# Supplementary material for: Single-cell RNA combined with Bulk RNA analysis to explore oxidative stress and energy metabolism factors and found a new prostatic cancer oncogene MXRA8
Source: publisher site journal article supplement (doi:10.18632/aging.205599), 2024-03-04
Supplement: Supplementary file [file aging-v16i5-205599-supplementary-material-SD12.pdf]

## SUPPLEMENTARY TABLES

**Supplementary Table 11. Clinical information table of TCGA PRAD cohort.**

| TCGA PRAD | Group information | Number of samples |
|-----------|-------------------|-------------------|
| PFS       | 0                 | 389               |
|           | 1                 | 89                |
| Age       | Age <60           | 316               |
|           | Age ≥60           | 162               |
| T_Stage   | T1/2              | 375               |
|           | T3/4              | 100               |
| N         | N0                | 335               |
|           | N1                | 74                |
| M         | M0                | 437               |
|           | M1                | 3                 |
| Race      | ASIAN             | 12                |
|           | INDIAN_AFRICAN    | 57                |
|           | WHITE             | 395               |

**Supplementary Table 12. Statistical of Oxidative Stress and Energy Metabolism Gene Set.**

| Related pathways                           | PathwayID     | Gene Count |
|--------------------------------------------|---------------|------------|
| Response to oxidative stress               | GO:0006979    | 444        |
| Cell death in response to oxidative stress | GO:0036473    | 89         |
| Cellular oxidant detoxification            | GO:0098869    | 102        |
| Biological oxidations                      | R-HSA-211859  | 221        |
| Metabolism of carbohydrates                | R-HSA-71387   | 292        |
| Mitochondrial Fatty Acid Beta-Oxidation    | R-HSA-77289   | 38         |
| Glycogen synthesis                         | R-HSA-3322077 | 16         |
| Glycogen metabolism                        | R-HSA-8982491 | 27         |
| Glucose metabolism                         | R-HSA-70326   | 92         |
| Glycogen breakdown glycogenolysis          | R-HSA-70221   | 15         |
| Glycolysis                                 | R-HSA-70171   | 72         |
| Pyruvate metabolism                        | R-HSA-70268   | 31         |
