# Supplementary material for: Single-cell RNA combined with bulk RNA analysis to explore oxidative stress and energy metabolism factors and found a new prostate cancer oncogene MXRA8
Source: Aging (Albany NY). 2024 Mar 4;16(5):4469–502. doi: 10.18632/aging.205599 (PMC10968713; doi:10.18632/aging.205599)
Supplement: Supplementary Table 1 [file aging-16-205599-s002.xlsx]

## Sheet: Meta_info
Supplementary Table 1. Single cell data analysis clustering and expression analysis results.
Cell	Patient	nCount_RNA	nFeature_RNA	percent.mito	percent.HB	seurat_clusters	Majortype
P1_AAACCTGAGAGCTATA.1	P1	8655	2333	0.0306181	0.00011554	2	Fibroblasts
P1_AAACCTGAGTGTTTGC.1	P1	11789	2754	0.0248537	8.48248e-05	6	Epithelial cells
P1_AAACCTGCAGTCAGCC.1	P1	32032.5	4917	0.0504175	3.12183e-05	9	Epithelial cells
P1_AAACCTGGTACATGTC.1	P1	13951	2692	0.0630779	0	0	Epithelial cells
P1_AAACCTGGTCGGCATC.1	P1	16081	3369	0.0266774	6.21852e-05	13	Epithelial cells
P1_AAACCTGGTGCAGACA.1	P1	13437.5	3006	0.0374326	0	13	Epithelial cells
P1_AAACCTGTCATTCACT.1	P1	23304	4419	0.0260899	0	6	Epithelial cells
P1_AAACCTGTCTTGAGGT.1	P1	18958.5	3153	0.0444128	0	12	Epithelial cells
P1_AAACGGGAGAGCCTAG.1	P1	22494	3798	0.0478794	0	12	Epithelial cells
P1_AAACGGGCAATAAGCA.1	P1	35217	4757	0.0577278	5.67908e-05	22	Epithelial cells
P1_AAACGGGGTAGGCATG.1	P1	12147.5	2695	0.0613295	8.23215e-05	6	Epithelial cells
P1_AAACGGGGTCGACTAT.1	P1	8315	2140	0.0444979	0	6	Epithelial cells
P1_AAACGGGGTCGATTGT.1	P1	7664	2254	0.0373173	0	5	Myofibroblasts
P1_AAACGGGTCAGCTTAG.1	P1	20331	2623	0.0483498	0	12	Epithelial cells
P1_AAAGATGAGACCTTTG.1	P1	18559.5	3741	0.0657345	0.000107762	15	Endothelial cells
P1_AAAGATGCACCAGATT.1	P1	12277	2284	0.0511526	0	0	Epithelial cells
P1_AAAGATGGTAGCGTGA.1	P1	13467.5	2770	0.040245	7.42528e-05	5	Myofibroblasts
P1_AAAGATGGTTACCAGT.1	P1	6599.5	1855	0.0322752	0	8	Macrophages
P1_AAAGATGTCGACCAGC.1	P1	6736	1927	0.0283551	0	13	Epithelial cells
P1_AAAGCAAAGACTACAA.1	P1	34220.5	4954	0.0201341	0.000789001	13	Epithelial cells
P1_AAAGCAAAGAGGTAGA.1	P1	10544	2513	0.0369879	0.000189681	31	Endothelial cells
P1_AAAGCAAAGCTATGCT.1	P1	8942	2076	0.0816372	0.000111832	4	CD8+ T-cells
P1_AAAGCAACACCGGAAA.1	P1	8523	2242	0.0524463	0.00011733	9	Epithelial cells
P1_AAAGCAATCGCTAGCG.1	P1	29558.5	4353	0.0416462	0	12	Epithelial cells
P1_AAAGCAATCTCAACTT.1	P1	24643	3941	0.0437041	4.05795e-05	9	Epithelial cells
P1_AAAGCAATCTCTTATG.1	P1	10791	2052	0.0552312	0	0	Epithelial cells
P1_AAAGTAGAGACTAGGC.1	P1	7480	2263	0.0298128	0	2	Fibroblasts
P1_AAAGTAGAGCTGAAAT.1	P1	8161	2340	0.0584487	0.000122534	9	Epithelial cells
P1_AAAGTAGAGCTGCCCA.1	P1	22061	3338	0.0617832	4.53289e-05	22	Epithelial cells
P1_AAAGTAGCATCTCGCT.1	P1	8053	2213	0.0550106	0	22	Epithelial cells
P1_AAAGTAGGTCACCCAG.1	P1	29023.5	4320	0.0566782	3.44548e-05	8	Monocytes
P1_AAAGTAGGTCCGTCAG.1	P1	6856.5	1744	0.0376285	0.000145847	12	Epithelial cells
P1_AAAGTAGTCATAGCAC.1	P1	26331.5	3810	0.0527885	0	22	Epithelial cells
P1_AAAGTAGTCCACGTTC.1	P1	18246	3111	0.0287186	0	10	Epithelial cells
P1_AAAGTAGTCGTTTATC.1	P1	12960	2869	0.0566358	0	0	Epithelial cells
P1_AAATGCCAGCCCAACC.1	P1	11416.5	2721	0.0346866	0	13	Epithelial cells
P1_AAATGCCAGGATCGCA.1	P1	14887	2995	0.0399678	0.000134345	10	Epithelial cells
P1_AAATGCCAGGCAGTCA.1	P1	8037.5	1907	0.0311042	0	5	Myofibroblasts
P1_AAATGCCCATCCGGGT.1	P1	6780	1230	0.020649	0	24	B-cells
P1_AAATGCCCATCGACGC.1	P1	17923	3466	0.0711376	0	9	Epithelial cells
P1_AAATGCCGTCCTAGCG.1	P1	10710.5	1943	0.0522851	0	0	Epithelial cells
P1_AAATGCCGTTCAGACT.1	P1	14754.5	3008	0.0691992	0	22	Epithelial cells
P1_AAATGCCTCGCTTAGA.1	P1	8997.5	1820	0.0541261	0	0	Epithelial cells
P1_AACACGTAGCAGACTG.1	P1	15165	2444	0.0488625	0	3	CD8+ T-cells
P1_AACACGTCAAGGGTCA.1	P1	12619	2605	0.0595134	7.92456e-05	4	CD8+ T-cells
P1_AACACGTCACACTGCG.1	P1	14260	2862	0.0524544	0	8	Monocytes
P1_AACACGTCAGATAATG.1	P1	11361	2465	0.06047	0.000176041	22	Epithelial cells
P1_AACACGTCAGTACACT.1	P1	24124	3571	0.0624689	0	0	Epithelial cells
P1_AACACGTTCACTATTC.1	P1	14545	3314	0.0283946	0	13	Epithelial cells
P1_AACACGTTCATTTGGG.1	P1	9921	2196	0.0526157	0	22	Epithelial cells
P1_AACACGTTCCTTTCGG.1	P1	8695	2328	0.0349626	0	6	Epithelial cells
P1_AACCATGAGAAACCTA.1	P1	39342	4774	0.0442021	0	12	Epithelial cells
P1_AACCATGAGTCACGCC.1	P1	6872.5	1784	0.0407421	0	6	Epithelial cells
P1_AACCATGCAATGGAAT.1	P1	14299	2680	0.0455976	0	0	Epithelial cells
P1_AACCATGGTCCCGACA.1	P1	31997	4773	0.0274088	0	13	Epithelial cells
P1_AACCGCGAGAACTGTA.1	P1	18244	3546	0.04385	5.48125e-05	12	Epithelial cells
P1_AACCGCGAGACTAGGC.1	P1	9890	2369	0.0270981	0	13	Epithelial cells
P1_AACCGCGAGCAATATG.1	P1	8227	2117	0.0234593	0	19	Epithelial cells
P1_AACCGCGCAAGCGATG.1	P1	7529	1943	0.013282	0	1	Epithelial cells
P1_AACCGCGCACGAAGCA.1	P1	8878.5	2375	0.0272569	0	31	Endothelial cells
P1_AACCGCGCATCGACGC.1	P1	7980	1892	0.0681704	0	12	Epithelial cells
P1_AACCGCGGTACCATCA.1	P1	12631.5	2611	0.0529628	0	3	CD8+ T-cells
P1_AACCGCGGTCGCGAAA.1	P1	9150.5	2129	0.0350801	0	2	Fibroblasts
P1_AACCGCGGTCGGCTCA.1	P1	34856.5	4341	0.0569478	2.86891e-05	0	Epithelial cells
P1_AACCGCGTCCAAACAC.1	P1	16848	2776	0.0438628	0	6	Epithelial cells
P1_AACCGCGTCCTTTCTC.1	P1	10047	2095	0.0750473	0	4	CD8+ T-cells
P1_AACGTTGAGTTAAGTG.1	P1	12406.5	2762	0.0494902	0	6	Epithelial cells
P1_AACGTTGCAAGACGTG.1	P1	36081	5225	0.0441784	0	9	Epithelial cells
P1_AACGTTGGTAGGACAC.1	P1	27033.5	4232	0.0350306	3.69911e-05	6	Epithelial cells
P1_AACGTTGTCGGATGGA.1	P1	7777.5	2295	0.0419158	0	21	Macrophages
P1_AACGTTGTCGGTGTCG.1	P1	12390.5	2851	0.0183205	8.0707e-05	2	Fibroblasts
P1_AACTCAGAGACGCACA.1	P1	23061.5	3794	0.0475685	0	12	Epithelial cells
P1_AACTCAGAGGACAGAA.1	P1	7414	2008	0.0281899	0	6	Epithelial cells
P1_AACTCAGAGTTGTCGT.1	P1	6684	1890	0.0272292	0	13	Epithelial cells
P1_AACTCAGCAAAGTCAA.1	P1	13383	2632	0.0490174	7.47217e-05	22	Epithelial cells
P1_AACTCAGCACGAAAGC.1	P1	19082.5	3633	0.0636709	0	9	Epithelial cells
P1_AACTCAGCAGATTGCT.1	P1	13810	2454	0.0517017	0	0	Epithelial cells
P1_AACTCAGCAGCCACCA.1	P1	26490.5	4154	0.0531134	0	9	Epithelial cells
P1_AACTCAGGTAAGTGGC.1	P1	11097.5	2471	0.0262221	0	12	Epithelial cells
P1_AACTCAGGTAGAGTGC.1	P1	18709.5	3543	0.0609851	5.34488e-05	9	Epithelial cells
P1_AACTCAGGTTGACGTT.1	P1	12614.5	2716	0.063102	7.92739e-05	6	Epithelial cells
P1_AACTCAGTCACCGTAA.1	P1	8333	1977	0.050522	0.0152406	19	Epithelial cells
P1_AACTCCCAGTACATGA.1	P1	12212	2390	0.0375041	8.18867e-05	19	Epithelial cells
P1_AACTCCCCAAGAGTCG.1	P1	15159	2691	0.0584471	0	0	Epithelial cells
P1_AACTCCCCAGGAACGT.1	P1	11003.5	2386	0.0467124	0	8	Monocytes
P1_AACTCCCCATTGGGCC.1	P1	11282.5	2755	0.0315533	8.86328e-05	13	Epithelial cells
P1_AACTCCCGTCGACTAT.1	P1	7548.5	1772	0.0306021	0	3	CD8+ T-cells
P1_AACTCCCGTCGCTTCT.1	P1	9110	2222	0.0758507	0	4	CD8+ T-cells
P1_AACTCCCGTCTGCGGT.1	P1	9444	2251	0.0276366	0	13	Epithelial cells
P1_AACTCCCGTTCTGTTT.1	P1	13751	3071	0.0253073	0	13	Epithelial cells
P1_AACTCCCTCAATCTCT.1	P1	11637	2470	0.056286	8.59328e-05	22	Epithelial cells
P1_AACTCTTAGACCACGA.1	P1	8978	2039	0.0539096	0	0	Epithelial cells
P1_AACTCTTAGCTGTTCA.1	P1	10722	1952	0.0355344	0	0	Epithelial cells
P1_AACTCTTCACAGGCCT.1	P1	10297.5	2340	0.0430202	0	3	CD8+ T-cells
P1_AACTCTTCACCAGGTC.1	P1	19841.5	3133	0.0439483	0	22	Epithelial cells
P1_AACTCTTCACCGATAT.1	P1	6590	1756	0.0582701	0	0	Epithelial cells
P1_AACTCTTCAGCCAATT.1	P1	12510	2399	0.0533973	0	0	Epithelial cells
P1_AACTGGTCACAAGTAA.1	P1	19217	3732	0.0666077	0	9	Epithelial cells
P1_AACTGGTCATTCACTT.1	P1	7302.5	2166	0.0603903	0.000136939	5	Myofibroblasts
P1_AACTGGTGTTAGATGA.1	P1	14132	2937	0.0335409	0.000849137	24	B-cells
P1_AACTGGTTCATGCTCC.1	P1	34835	4660	0.0549734	0	0	Epithelial cells
P1_AACTGGTTCCCAAGTA.1	P1	7054	1743	0.0433796	0	6	Epithelial cells
P1_AACTGGTTCCTCATTA.1	P1	10827	2414	0.0558788	0	3	CD8+ T-cells
P1_AACTGGTTCGATGAGG.1	P1	12157	2077	0.0616929	0	4	CD8+ T-cells
P1_AACTTTCAGAACTGTA.1	P1	16276.5	2559	0.0440512	0	4	CD8+ T-cells
P1_AACTTTCAGATAGCAT.1	P1	12988	2821	0.079073	0	22	Epithelial cells
P1_AACTTTCAGGTACTCT.1	P1	8628.5	1782	0.0263082	0	7	Mast
P1_AACTTTCAGTACGCGA.1	P1	7191.5	1707	0.0346242	0	15	Endothelial cells
P1_AACTTTCAGTCACGCC.1	P1	36513	4886	0.0350286	0	9	Epithelial cells
P1_AACTTTCAGTGGACGT.1	P1	11442	2136	0.0321622	0	0	Epithelial cells
P1_AACTTTCAGTGGGATC.1	P1	9088.5	2289	0.0217858	0	6	Epithelial cells
P1_AACTTTCCAAGAAAGG.1	P1	6479	1898	0.0375058	0	6	Epithelial cells
P1_AACTTTCCATGCAACT.1	P1	10525	2198	0.0584323	0	0	Epithelial cells
P1_AACTTTCGTCCCTACT.1	P1	7069	1685	0.0261706	0	10	Epithelial cells
P1_AACTTTCGTGTGAAAT.1	P1	10423	2732	0.054207	9.59417e-05	22	Epithelial cells
P1_AACTTTCTCACATACG.1	P1	20721.5	3801	0.0345052	4.82591e-05	10	Epithelial cells
P1_AAGACCTAGCTACCTA.1	P1	9113	2047	0.0438933	0	1	Epithelial cells
P1_AAGACCTCAATCACAC.1	P1	14976	2459	0.0383948	0	12	Epithelial cells
P1_AAGACCTCAATTCCTT.1	P1	12449.5	2953	0.0309249	8.03245e-05	6	Epithelial cells
P1_AAGACCTCACCGATAT.1	P1	14136	2770	0.0479626	0	0	Epithelial cells
P1_AAGACCTCATTACCTT.1	P1	33777.5	4352	0.0495004	5.9211e-05	0	Epithelial cells
P1_AAGACCTGTAAACACA.1	P1	21597	3950	0.0291244	0	13	Epithelial cells
P1_AAGACCTTCATTGCCC.1	P1	10693.5	2280	0.0591013	0	9	Epithelial cells
P1_AAGACCTTCTAAGCCA.1	P1	18255	3223	0.0574637	5.47795e-05	22	Epithelial cells
P1_AAGCCGCAGGAGTCTG.1	P1	15325	3644	0.0477651	6.52529e-05	9	Epithelial cells
P1_AAGCCGCAGTGACATA.1	P1	10147	2351	0.0362669	0	17	Endothelial cells
P1_AAGCCGCCAAGCCATT.1	P1	18938.5	3560	0.0653167	0.000158407	13	Epithelial cells
P1_AAGCCGCGTATCTGCA.1	P1	18216.5	2949	0.0615925	5.48953e-05	0	Epithelial cells
P1_AAGCCGCGTGCTTCTC.1	P1	10978.5	2651	0.0342488	0	6	Epithelial cells
P1_AAGCCGCGTGTGACCC.1	P1	12890	2565	0.0402638	0	5	Myofibroblasts
P1_AAGCCGCGTTTAAGCC.1	P1	6831	1762	0.0332309	0.000146391	8	Macrophages
P1_AAGCCGCTCAAGGCTT.1	P1	18401	3082	0.0347807	0.000163035	24	B-cells
P1_AAGCCGCTCACAAACC.1	P1	10878	1850	0.0382423	0	0	Epithelial cells
P1_AAGCCGCTCGCGGATC.1	P1	11027	2395	0.0562256	0	0	Epithelial cells
P1_AAGGAGCAGGCGACAT.1	P1	18278	3949	0.0881387	0	12	Epithelial cells
P1_AAGGAGCAGTTGTAGA.1	P1	7133.5	2025	0.039672	0.000140184	13	Epithelial cells
P1_AAGGAGCCAAGTCTGT.1	P1	24271	1229	0.00543859	8.24029e-05	24	B-cells
P1_AAGGAGCCACTACAGT.1	P1	17082	2671	0.0314951	0	0	Epithelial cells
P1_AAGGAGCGTATAGTAG.1	P1	32706	4807	0.021097	6.11509e-05	13	Epithelial cells
P1_AAGGAGCGTGTTGAGG.1	P1	10514	2434	0.0395663	0	13	Epithelial cells
P1_AAGGAGCGTTCGTGAT.1	P1	10904	2101	0.0659391	0	24	B-cells
P1_AAGGCAGAGGAATTAC.1	P1	7414.5	1846	0.0747185	0	4	CD8+ T-cells
P1_AAGGCAGCACATCTTT.1	P1	34310.5	4639	0.064849	0	0	Epithelial cells
P1_AAGGCAGCAGACTCGC.1	P1	20271	3871	0.0567806	0	0	Epithelial cells
P1_AAGGCAGCAGCTGTGC.1	P1	11702	2321	0.0364895	0	17	Endothelial cells
P1_AAGGCAGCATCACGAT.1	P1	16003	3074	0.0567394	0	22	Epithelial cells
P1_AAGGCAGGTTGCTCCT.1	P1	9735	2866	0.0472522	0	15	Endothelial cells
P1_AAGGCAGTCACAGGCC.1	P1	22949	3617	0.0381716	0	9	Epithelial cells
P1_AAGGCAGTCTCATTCA.1	P1	11649	2614	0.0470427	0	22	Epithelial cells
P1_AAGGTTCAGAACAATC.1	P1	14481.5	2928	0.0317647	0	6	Epithelial cells
P1_AAGGTTCAGAAGAAGC.1	P1	11221	2629	0.0264682	8.91186e-05	13	Epithelial cells
P1_AAGGTTCCAAGCTGAG.1	P1	7803	1860	0.0338331	0	6	Epithelial cells
P1_AAGGTTCCACATTAGC.1	P1	7864	1795	0.0527721	0	3	CD8+ T-cells
P1_AAGGTTCGTAATCGTC.1	P1	9052.5	2757	0.0246341	0	12	Epithelial cells
P1_AAGGTTCTCATGCTCC.1	P1	15894	3109	0.0373726	6.29168e-05	6	Epithelial cells
P1_AAGGTTCTCGCAAACT.1	P1	20594.5	3213	0.0403506	4.85567e-05	1	Epithelial cells
P1_AAGTCTGAGACAGACC.1	P1	10887.5	2602	0.040597	0	22	Epithelial cells
P1_AAGTCTGAGGAGTACC.1	P1	26343.5	4367	0.0242565	7.59201e-05	13	Epithelial cells
P1_AAGTCTGCATGAACCT.1	P1	16880	3627	0.0293839	5.92417e-05	13	Epithelial cells
P1_AAGTCTGGTCTAGTGT.1	P1	11013	2703	0.0371379	9.08018e-05	13	Epithelial cells
P1_AAGTCTGTCAGCGACC.1	P1	31385	4441	0.0617174	0	9	Epithelial cells
P1_AAGTCTGTCCACGTGG.1	P1	13114.5	2550	0.0886805	0	4	CD8+ T-cells
P1_AAGTCTGTCCAGTATG.1	P1	14715	2910	0.067686	0	22	Epithelial cells
P1_AATCCAGAGGCAGTCA.1	P1	8580	2276	0.0413753	0	21	Macrophages
P1_AATCCAGCAGCCTTGG.1	P1	7864	2135	0.0412004	0	21	Macrophages
P1_AATCCAGGTGCGATAG.1	P1	24635.5	4407	0.0252887	0	13	Epithelial cells
P1_AATCCAGTCTGAAAGA.1	P1	23605	3771	0.0327049	0	6	Epithelial cells
P1_AATCGGTAGATGGGTC.1	P1	37111	4564	0.057099	0	22	Epithelial cells
P1_AATCGGTCAAGAAGAG.1	P1	23557.5	3534	0.0507269	4.24493e-05	1	Epithelial cells
P1_AATCGGTCAGGCAGTA.1	P1	8352	2611	0.0897989	0	6	Epithelial cells
P1_AATCGGTCATGGAATA.1	P1	14581	2827	0.0637816	0	6	Epithelial cells
P1_AATCGGTGTAGCGTCC.1	P1	9871	1783	0.0701043	0	4	CD8+ T-cells
P1_AATCGGTGTCAAGCGA.1	P1	12032.5	2126	0.0373156	0.00864326	1	Epithelial cells
P1_AATCGGTGTCGGCACT.1	P1	10861.5	2793	0.0557934	9.20683e-05	5	Myofibroblasts
P1_AATCGGTGTCTGATCA.1	P1	9988	2281	0.0535643	0	3	CD8+ T-cells
P1_AATCGGTTCAGAGGTG.1	P1	8398	2011	0.061205	0	11	Epithelial cells
P1_AATCGGTTCCTTCAAT.1	P1	11973.5	2754	0.0408402	0	15	Endothelial cells
P1_AATCGGTTCTTTCCTC.1	P1	6947.5	1892	0.0495142	0	3	CD8+ T-cells
P1_ACACCAAAGACCGGAT.1	P1	7534	1928	0.0376958	0	32	Macrophages
P1_ACACCAAAGAGGGCTT.1	P1	10048	2404	0.0473726	9.95223e-05	6	Epithelial cells
P1_ACACCAAAGCGTAGTG.1	P1	12168	2873	0.0355851	0	6	Epithelial cells
P1_ACACCAAAGCTACCGC.1	P1	26060	3982	0.0612817	3.8373e-05	9	Epithelial cells
P1_ACACCAAAGCTTCGCG.1	P1	7403.5	1841	0.0520024	0.000135071	0	Epithelial cells
P1_ACACCAAAGTAGGTGC.1	P1	13710.5	3110	0.0625798	0	5	Myofibroblasts
P1_ACACCAAGTACATGTC.1	P1	20627.5	3240	0.0374742	0	6	Epithelial cells
P1_ACACCAAGTCTACCTC.1	P1	7987	1753	0.0656066	0	4	CD8+ T-cells
P1_ACACCAAGTGCAACGA.1	P1	16355.5	3143	0.065666	6.11415e-05	22	Epithelial cells
P1_ACACCAAGTTGATTCG.1	P1	7757	2158	0.0284904	0	12	Epithelial cells
P1_ACACCAAGTTGTGGCC.1	P1	13248	2437	0.0453653	0	1	Epithelial cells
P1_ACACCAATCTCATTCA.1	P1	12784.5	2580	0.0524072	0	8	Monocytes
P1_ACACCCTAGTGGCACA.1	P1	11280.5	2187	0.0695891	0	4	CD8+ T-cells
P1_ACACCCTCAAAGGCGT.1	P1	17313	3661	0.0426847	5.77601e-05	13	Epithelial cells
P1_ACACCCTCACACAGAG.1	P1	10415.5	2274	0.0603908	0	4	CD8+ T-cells
P1_ACACCCTCAGACGTAG.1	P1	11972	3075	0.0410124	0.00250585	5	Myofibroblasts
P1_ACACCGGAGATCCCGC.1	P1	26470.5	4054	0.0648647	3.77779e-05	0	Epithelial cells
P1_ACACCGGAGGGAACGG.1	P1	6778	1973	0.0495721	0	13	Epithelial cells
P1_ACACCGGCACATTTCT.1	P1	8604	2414	0.0252208	0	10	Epithelial cells
P1_ACACCGGGTCCGTCAG.1	P1	6714	1767	0.0291927	0.000148943	6	Epithelial cells
P1_ACACCGGGTGTAACGG.1	P1	7189	1734	0.0485464	0	12	Epithelial cells
P1_ACACCGGTCCACGCAG.1	P1	13550	3113	0.0577122	7.38007e-05	22	Epithelial cells
P1_ACACCGGTCGGCTACG.1	P1	20981	3841	0.0334112	0	13	Epithelial cells
P1_ACACCGGTCTGGGCCA.1	P1	7836	1653	0.0847371	0	14	CD8+ T-cells
P1_ACACTGAAGAATAGGG.1	P1	17920	2854	0.0626116	5.58036e-05	6	Epithelial cells
P1_ACACTGAAGCAGGTCA.1	P1	13258.5	2356	0.0576988	0	4	CD8+ T-cells
P1_ACACTGAAGCGCCTCA.1	P1	30914	4320	0.0681892	0	6	Epithelial cells
P1_ACACTGACAATGGACG.1	P1	15602.5	2583	0.0487101	0	12	Epithelial cells
P1_ACACTGACAATTGCTG.1	P1	11730	2272	0.0485934	0	0	Epithelial cells
P1_ACACTGACAGTTCATG.1	P1	7080.5	1780	0.0488666	0.000282466	10	Epithelial cells
P1_ACACTGAGTAAGTGTA.1	P1	28129	4258	0.0636709	3.55505e-05	9	Epithelial cells
P1_ACACTGAGTGTGAATA.1	P1	8091	2149	0.0291682	0	6	Epithelial cells
P1_ACACTGATCACAAACC.1	P1	7660.5	2005	0.0314601	0	2	Fibroblasts
P1_ACACTGATCGCAAGCC.1	P1	14751	2786	0.0846044	0	4	CD8+ T-cells
P1_ACACTGATCGCAGGCT.1	P1	7517	2583	0.0874019	0	15	Endothelial cells
P1_ACACTGATCTATGTGG.1	P1	26907.5	4257	0.0549661	3.71644e-05	12	Epithelial cells
P1_ACACTGATCTGTACGA.1	P1	11590.5	2313	0.0402053	0.000172555	1	Epithelial cells
P1_ACAGCCGAGACATAAC.1	P1	10413	2932	0.0649189	0	13	Epithelial cells
P1_ACAGCCGAGCCACGTC.1	P1	8762.5	2640	0.0333238	0	17	Endothelial cells
P1_ACAGCCGAGCTGCAAG.1	P1	12195	2170	0.0496925	8.20008e-05	22	Epithelial cells
P1_ACAGCCGGTATAGGGC.1	P1	9175.5	2401	0.0634298	0.000108986	0	Epithelial cells
P1_ACAGCCGTCGCCAGCA.1	P1	8123	1847	0.0342238	0.000123107	12	Epithelial cells
P1_ACAGCCGTCGCGCCAA.1	P1	11735.5	2589	0.0555579	0	13	Epithelial cells
P1_ACAGCTAAGGCACATG.1	P1	21061.5	3064	0.0163331	0	12	Epithelial cells
P1_ACAGCTACAGGACGTA.1	P1	20144	3261	0.044728	4.96426e-05	9	Epithelial cells
P1_ACAGCTACATGTAGTC.1	P1	19759.5	3724	0.0605785	0	6	Epithelial cells
P1_ACAGCTAGTCACTTCC.1	P1	9293	2186	0.0724201	0	4	CD8+ T-cells
P1_ACAGCTATCTTGTATC.1	P1	26957	3974	0.0303446	0	10	Epithelial cells
P1_ACATACGAGAGGTAGA.1	P1	8581	1787	0.0313483	0	1	Epithelial cells
P1_ACATACGAGATGCCTT.1	P1	7189.5	1924	0.0260102	0	3	CD8+ T-cells
P1_ACATACGAGCCAGTTT.1	P1	10333.5	2883	0.0551604	9.67726e-05	21	Macrophages
P1_ACATACGAGCTAACAA.1	P1	6724	1838	0.0416419	0	32	Macrophages
P1_ACATACGCAATCCGAT.1	P1	24153	3966	0.0254627	0	13	Epithelial cells
P1_ACATACGCATCACCCT.1	P1	6503	1393	0.0227587	0	8	Monocytes
P1_ACATACGTCCTGCAGG.1	P1	8076	1975	0.0380139	0	1	Epithelial cells
P1_ACATACGTCTGGAGCC.1	P1	12200.5	3183	0.0440966	8.19639e-05	17	Endothelial cells
P1_ACATCAGAGCAGCGTA.1	P1	9611	1856	0.0775153	0	4	CD8+ T-cells
P1_ACATCAGAGGGCTTGA.1	P1	15408.5	2488	0.0359542	0	6	Epithelial cells
P1_ACATCAGCAATGCCAT.1	P1	22177.5	4448	0.032781	0	5	Myofibroblasts
P1_ACATCAGGTCCAGTGC.1	P1	14783	3189	0.0779273	0.000135291	6	Epithelial cells
P1_ACATCAGGTGCAGACA.1	P1	12366.5	3136	0.0352565	0	13	Epithelial cells
P1_ACATCAGTCACTCTTA.1	P1	19704	3718	0.0500406	0.000101502	6	Epithelial cells
P1_ACATCAGTCATGTCTT.1	P1	30754	4810	0.054627	0	9	Epithelial cells
P1_ACATCAGTCCACTCCA.1	P1	19981.5	3483	0.0503466	0	12	Epithelial cells
P1_ACATCAGTCTAACCGA.1	P1	12893.5	2417	0.0748439	7.75585e-05	3	CD8+ T-cells
P1_ACATGGTAGGCCCTCA.1	P1	16316.5	2579	0.0482334	0	0	Epithelial cells
P1_ACATGGTAGTCATCCA.1	P1	23322	4154	0.0265843	4.2878e-05	13	Epithelial cells
P1_ACATGGTAGTCCATAC.1	P1	11207	1969	0.0637994	0	4	CD8+ T-cells
P1_ACATGGTCAACAACCT.1	P1	10508.5	2164	0.0426322	9.51611e-05	12	Epithelial cells
P1_ACATGGTGTAGCGCAA.1	P1	32525	4473	0.0491622	0	22	Epithelial cells
P1_ACATGGTTCACGATGT.1	P1	9663	2138	0.0466729	0	8	Macrophages
P1_ACCAGTAAGCTTATCG.1	P1	15873.5	2967	0.0492015	0.000125996	22	Epithelial cells
P1_ACCAGTAAGGACAGAA.1	P1	11928	2380	0.0610329	0	4	CD8+ T-cells
P1_ACCAGTACAATCCGAT.1	P1	8962	2015	0.0605892	0	0	Epithelial cells
P1_ACCAGTACACCTCGTT.1	P1	7546	1870	0.0451895	0	12	Epithelial cells
P1_ACCAGTACATCCGTGG.1	P1	11918	2006	0.0608324	0	0	Epithelial cells
P1_ACCAGTACATGGGACA.1	P1	20659	3946	0.0237669	0	13	Epithelial cells
P1_ACCAGTAGTGTGTGCC.1	P1	30441.5	4171	0.0500961	3.28499e-05	22	Epithelial cells
P1_ACCAGTATCAATAAGG.1	P1	26740.5	3876	0.0616668	0	24	B-cells
P1_ACCAGTATCTTCCTTC.1	P1	12749.5	2820	0.0567081	7.84344e-05	22	Epithelial cells
P1_ACCCACTAGGGTATCG.1	P1	13514	2545	0.0569779	0	22	Epithelial cells
P1_ACCCACTAGTCTTGCA.1	P1	19164.5	2936	0.0468575	0	0	Epithelial cells
P1_ACCCACTCAAAGAATC.1	P1	8038.5	1974	0.0288611	0.000124401	19	Epithelial cells
P1_ACCCACTCACGAAGCA.1	P1	7907	1826	0.0552675	0	0	Epithelial cells
P1_ACCCACTCACTCGACG.1	P1	8138	810	0.0202753	0.00012288	24	B-cells
P1_ACCCACTGTATTCGTG.1	P1	11195	2452	0.0647611	8.93256e-05	7	Mast
P1_ACCCACTGTGTATGGG.1	P1	18623	2954	0.0646512	0	4	CD8+ T-cells
P1_ACCCACTTCAACGAAA.1	P1	10405.5	2111	0.0414204	0	8	Monocytes
P1_ACCGTAACACAACGTT.1	P1	8034.5	2159	0.0294978	0	6	Epithelial cells
P1_ACCGTAACATTATCTC.1	P1	8626.5	2157	0.046021	0	2	Fibroblasts
P1_ACCGTAAGTCAAACTC.1	P1	6843	1667	0.0211895	0	2	Fibroblasts
P1_ACCGTAATCGCAAACT.1	P1	9834	2517	0.0398617	0	13	Epithelial cells
P1_ACCGTAATCTGTCCGT.1	P1	7641.5	1926	0.0639927	0	4	CD8+ T-cells
P1_ACCGTAATCTTCAACT.1	P1	8141	2134	0.0200221	0	10	Epithelial cells
P1_ACCGTAATCTTGCCGT.1	P1	13259	2677	0.0324308	0	6	Epithelial cells
P1_ACCTTTAAGGCTAGAC.1	P1	11647.5	2669	0.0330543	0	12	Epithelial cells
P1_ACCTTTACAAAGAATC.1	P1	18913.5	3179	0.0590583	0.000105745	0	Epithelial cells
P1_ACCTTTACACAACTGT.1	P1	6832	1890	0.0319087	0	8	Monocytes
P1_ACCTTTACACAGACAG.1	P1	12904	2502	0.0543242	7.74954e-05	22	Epithelial cells
P1_ACCTTTACAGTCGATT.1	P1	17045.5	3137	0.0526239	0	9	Epithelial cells
P1_ACCTTTACATTGTGCA.1	P1	16615	3250	0.0606681	6.01866e-05	0	Epithelial cells
P1_ACCTTTAGTATTACCG.1	P1	10974.5	2644	0.0483849	0	22	Epithelial cells
P1_ACCTTTAGTCACAAGG.1	P1	9275	2540	0.0483019	0	15	Endothelial cells
P1_ACCTTTAGTGGACGAT.1	P1	12129	2762	0.0502102	0	0	Epithelial cells
P1_ACCTTTATCAGTTCGA.1	P1	16700	3120	0.0637725	5.98802e-05	9	Epithelial cells
P1_ACGAGCCAGAAACGAG.1	P1	6546.5	1925	0.0252043	0	2	Fibroblasts
P1_ACGAGCCAGATGTCGG.1	P1	8391	1797	0.0234775	0	2	Fibroblasts
P1_ACGAGCCAGGTAAACT.1	P1	15012	3285	0.0556888	0	20	Fibroblasts
P1_ACGAGCCCAACACGCC.1	P1	14148.5	3038	0.0433261	0	12	Epithelial cells
P1_ACGAGCCCAATAGCAA.1	P1	11012	2744	0.0471304	0	6	Epithelial cells
P1_ACGAGCCCACAAGTAA.1	P1	14875.5	3120	0.0639978	6.72246e-05	22	Epithelial cells
P1_ACGAGCCGTCAAAGCG.1	P1	31043	4057	0.0614309	0	22	Epithelial cells
P1_ACGAGCCTCATGCTCC.1	P1	12129.5	2435	0.0267117	0	1	Epithelial cells
P1_ACGAGCCTCCAGAAGG.1	P1	20423.5	3419	0.0604696	0	19	Epithelial cells
P1_ACGAGGACACCCAGTG.1	P1	8027.5	2216	0.052071	0	22	Epithelial cells
P1_ACGAGGACACTCAGGC.1	P1	17118	3518	0.0245356	0	17	Endothelial cells
P1_ACGAGGACATATACCG.1	P1	15661	3473	0.0344806	0	13	Epithelial cells
P1_ACGAGGAGTAGCCTAT.1	P1	8320	1965	0.0466346	0	10	Epithelial cells
P1_ACGAGGAGTATATCCG.1	P1	7494	1588	0.0301575	0	1	Epithelial cells
P1_ACGAGGAGTATCAGTC.1	P1	7182.5	1879	0.0652976	0	4	CD8+ T-cells
P1_ACGAGGATCAAACGGG.1	P1	8468.5	2040	0.046053	0	22	Epithelial cells
P1_ACGAGGATCAATCTCT.1	P1	20983	3681	0.0590955	0	8	Monocytes
P1_ACGAGGATCAGTGTTG.1	P1	34096	4034	0.0511204	0	11	Epithelial cells
P1_ACGAGGATCATAGCAC.1	P1	26815	3606	0.0418423	3.72926e-05	9	Epithelial cells
P1_ACGAGGATCGCGTAGC.1	P1	13781.5	2392	0.0304756	0	19	Epithelial cells
P1_ACGAGGATCGTGTAGT.1	P1	8662	1990	0.0399446	0	1	Epithelial cells
P1_ACGAGGATCTGCGTAA.1	P1	14832	3247	0.0355987	0	13	Epithelial cells
P1_ACGAGGATCTGCTTGC.1	P1	23215	3488	0.0507	0	24	B-cells
P1_ACGATACAGCCGATTT.1	P1	14959	3064	0.0540143	0	22	Epithelial cells
P1_ACGATACAGGGATGGG.1	P1	36630	4722	0.0551188	0.0001092	6	Epithelial cells
P1_ACGATACCAATGTAAG.1	P1	17137	3451	0.0599872	0	22	Epithelial cells
P1_ACGATACCACGAGAGT.1	P1	16130	2387	0.0263484	0	12	Epithelial cells
P1_ACGATACCACGGTAAG.1	P1	7279	2117	0.0281632	0	15	Endothelial cells
P1_ACGATACCAGATGAGC.1	P1	8060.5	2280	0.0305192	0.000124062	5	Myofibroblasts
P1_ACGATACCATGTCGAT.1	P1	7024.5	1899	0.0465514	0	32	Macrophages
P1_ACGATACGTGATGTCT.1	P1	14399	2013	0.0299326	0	12	Epithelial cells
P1_ACGATACTCAAACGGG.1	P1	16159.5	2236	0.0461029	6.18831e-05	0	Epithelial cells
P1_ACGATACTCCAGTATG.1	P1	6789	1446	0.00633378	0.000441891	1	Epithelial cells
P1_ACGATACTCTTATCTG.1	P1	10440	2416	0.0670498	9.57854e-05	4	CD8+ T-cells
P1_ACGATGTAGCCTATGT.1	P1	7948.5	1932	0.0407624	0.00025162	10	Epithelial cells
P1_ACGATGTCAAGCTGTT.1	P1	10447	2453	0.0325452	0	1	Epithelial cells
P1_ACGATGTGTAAGTAGT.1	P1	16108	2828	0.082071	0	3	CD8+ T-cells
P1_ACGATGTGTAGCGTAG.1	P1	6891.5	1742	0.032794	0	6	Epithelial cells
P1_ACGATGTGTCGAATCT.1	P1	15460	3295	0.030401	6.46831e-05	13	Epithelial cells
P1_ACGATGTGTCTGCAAT.1	P1	33135	4298	0.0578542	0	22	Epithelial cells
P1_ACGATGTTCATACGGT.1	P1	9608	2345	0.0568276	0	3	CD8+ T-cells
P1_ACGCAGCAGGCTAGCA.1	P1	13981	2237	0.0550747	0.000143051	0	Epithelial cells
P1_ACGCAGCCAGCCTGTG.1	P1	18157	3235	0.0442804	0.00011015	9	Epithelial cells
P1_ACGCAGCCAGTCAGAG.1	P1	16146.5	3298	0.0675688	6.19329e-05	12	Epithelial cells
P1_ACGCAGCCATCACGTA.1	P1	7629.5	1940	0.04286	0.00013107	6	Epithelial cells
P1_ACGCAGCGTGTAAGTA.1	P1	11729.5	2103	0.0412635	0	12	Epithelial cells
P1_ACGCCAGAGCGCTTAT.1	P1	14679	3174	0.0730976	0	9	Epithelial cells
P1_ACGCCAGCACTGAAGG.1	P1	13443	2878	0.0540058	0	13	Epithelial cells
P1_ACGCCAGTCACTTCAT.1	P1	6973	2002	0.0438836	0	1	Epithelial cells
P1_ACGCCAGTCAGTGTTG.1	P1	7514	1796	0.0686718	0.000133085	0	Epithelial cells
P1_ACGCCAGTCCAAACTG.1	P1	17399	3548	0.0525318	0	15	Endothelial cells
P1_ACGCCAGTCCCACTTG.1	P1	13914	2032	0.0405347	0	12	Epithelial cells
P1_ACGCCGAAGAGTACCG.1	P1	12661	2440	0.0631072	0	0	Epithelial cells
P1_ACGCCGACAAATCCGT.1	P1	10781	2385	0.0424821	0	8	Macrophages
P1_ACGCCGACACATAACC.1	P1	11733	2191	0.0605131	0	0	Epithelial cells
P1_ACGCCGACAGGCGATA.1	P1	28095	4660	0.0427478	0	13	Epithelial cells
P1_ACGCCGACAGGTTTCA.1	P1	20684.5	3450	0.0402234	4.83454e-05	19	Epithelial cells
P1_ACGCCGACATACCATG.1	P1	14715.5	2592	0.0554517	0	0	Epithelial cells
P1_ACGCCGACATGTAGTC.1	P1	11653.5	2132	0.0719955	8.58111e-05	14	CD8+ T-cells
P1_ACGCCGAGTCGGCATC.1	P1	29742	4305	0.0452895	0	19	Epithelial cells
P1_ACGCCGAGTCTTGATG.1	P1	7007.5	1754	0.04538	0	6	Epithelial cells
P1_ACGCCGAGTTGATTGC.1	P1	15470.5	2628	0.02508	0	12	Epithelial cells
P1_ACGCCGATCATGGTCA.1	P1	8559	1978	0.0260544	0.000116836	15	Endothelial cells
P1_ACGCCGATCGTTGCCT.1	P1	14751.5	2663	0.0461648	6.77897e-05	0	Epithelial cells
P1_ACGCCGATCTGGCGAC.1	P1	9056	2468	0.0484761	0	0	Epithelial cells
P1_ACGGAGAAGCGATATA.1	P1	6499	1959	0.0615479	0	22	Epithelial cells
P1_ACGGAGAAGCTATGCT.1	P1	18386.5	3173	0.0732603	0	9	Epithelial cells
P1_ACGGAGAAGTGATCGG.1	P1	28643	4295	0.0718151	6.98251e-05	9	Epithelial cells
P1_ACGGAGACACAACTGT.1	P1	13381	2434	0.0356476	0.000149466	1	Epithelial cells
P1_ACGGAGACAGTTCATG.1	P1	9083	1790	0.0463503	0	0	Epithelial cells
P1_ACGGAGACATGACATC.1	P1	14095.5	3117	0.0449789	0	6	Epithelial cells
P1_ACGGAGAGTCAGAAGC.1	P1	13565.5	2800	0.0513066	0.0191663	0	Epithelial cells
P1_ACGGAGAGTCCGTGAC.1	P1	7926	1962	0.0546303	0.000126167	6	Epithelial cells
P1_ACGGAGATCACATAGC.1	P1	7830.5	2415	0.0630866	0	12	Epithelial cells
P1_ACGGAGATCATTATCC.1	P1	7771	2171	0.0387338	0	32	Macrophages
P1_ACGGAGATCCATTCTA.1	P1	15792	2583	0.0561677	0	4	CD8+ T-cells
P1_ACGGAGATCGGAATCT.1	P1	9036	2007	0.04139	0	33	Epithelial cells
P1_ACGGCCAAGGCTCTTA.1	P1	8888.5	2297	0.0643528	0.000112505	7	Mast
P1_ACGGCCACAACAACCT.1	P1	13779	2670	0.0512374	0	12	Epithelial cells
P1_ACGGCCACACAACGCC.1	P1	7796	2130	0.0319395	0	2	Fibroblasts
P1_ACGGCCACATGCCTTC.1	P1	20294	3324	0.0513452	0	22	Epithelial cells
P1_ACGGCCAGTACCGAGA.1	P1	8855	1493	0.0478826	0	4	CD8+ T-cells
P1_ACGGCCAGTTAAAGAC.1	P1	12438	2723	0.029426	0	6	Epithelial cells
P1_ACGGCCATCGGGAGTA.1	P1	12219	2641	0.0281529	0	13	Epithelial cells
P1_ACGGGCTAGTACGATA.1	P1	10471	2136	0.0710534	9.55019e-05	0	Epithelial cells
P1_ACGGGCTTCCGCAAGC.1	P1	10723	2462	0.0506388	0	3	CD8+ T-cells
P1_ACGGGTCCACGACTCG.1	P1	14788	2531	0.0489586	0	0	Epithelial cells
P1_ACGGGTCCACTCGACG.1	P1	10996	2356	0.039378	0	22	Epithelial cells
P1_ACGGGTCGTATGAAAC.1	P1	9534	2040	0.0457311	0.000104888	0	Epithelial cells
P1_ACGGGTCGTCTAAACC.1	P1	24035.5	4552	0.0378607	0	13	Epithelial cells
P1_ACGGGTCTCGAGCCCA.1	P1	25183	4176	0.0310527	0	13	Epithelial cells
P1_ACGTCAAAGTGAAGTT.1	P1	9039	1901	0.0750083	0	4	CD8+ T-cells
P1_ACGTCAACACACATGT.1	P1	38224	4893	0.0500209	2.61616e-05	22	Epithelial cells
P1_ACGTCAACACCGCTAG.1	P1	12166	2954	0.0614828	0	22	Epithelial cells
P1_ACGTCAATCCAGATCA.1	P1	9416.5	2246	0.049169	0	19	Epithelial cells
P1_ACGTCAATCCTCTAGC.1	P1	15438	2594	0.0509781	0	0	Epithelial cells
P1_ACGTCAATCTATGTGG.1	P1	12141	2584	0.0259451	8.23655e-05	6	Epithelial cells
P1_ACTATCTAGTATCGAA.1	P1	10751	2676	0.0536694	0	0	Epithelial cells
P1_ACTATCTAGTTACGGG.1	P1	8794	2410	0.0386627	0	6	Epithelial cells
P1_ACTATCTCAATGACCT.1	P1	21161.5	4034	0.0581717	0	11	Epithelial cells
P1_ACTATCTCAGGATCGA.1	P1	22134.5	3532	0.0651472	0	8	Monocytes
P1_ACTATCTGTCCGAGTC.1	P1	9089	3268	0.0269557	0.000110023	8	Monocytes
P1_ACTATCTGTCGGCACT.1	P1	9266.5	2446	0.0324826	0.000107916	20	Epithelial cells
P1_ACTATCTGTTCCATGA.1	P1	13736	2564	0.0466657	7.28014e-05	12	Epithelial cells
P1_ACTATCTTCAATCTCT.1	P1	14222	3395	0.0363521	0	20	Myofibroblasts
P1_ACTATCTTCCGCTGTT.1	P1	11737	2950	0.0468604	0	6	Epithelial cells
P1_ACTATCTTCGCCAAAT.1	P1	7448.5	2076	0.038397	0	32	Macrophages
P1_ACTATCTTCGTTGCCT.1	P1	6699	626	0.0123899	0	24	B-cells
P1_ACTGAACAGGTGCTTT.1	P1	13546	2798	0.045327	0	0	Epithelial cells
P1_ACTGAACAGTACATGA.1	P1	7002	1745	0.0482719	0.000142816	12	Epithelial cells
P1_ACTGAACGTGTGAAAT.1	P1	9333	2249	0.0412515	0	1	Epithelial cells
P1_ACTGAACTCCCATTTA.1	P1	8717	2222	0.0445107	0	1	Epithelial cells
P1_ACTGAACTCCTTCAAT.1	P1	9037	2416	0.0309837	0.000221312	13	Epithelial cells
P1_ACTGAACTCTACCAGA.1	P1	7844	1922	0.0603009	0	0	Epithelial cells
P1_ACTGAACTCTGCAGTA.1	P1	15359	2802	0.0830783	0.000130217	4	CD8+ T-cells
P1_ACTGAGTAGTAATCCC.1	P1	9815	2089	0.0680591	0.00020377	4	CD8+ T-cells
P1_ACTGAGTCACTGTCGG.1	P1	10547	2336	0.074808	9.48137e-05	22	Epithelial cells
P1_ACTGAGTGTCCGAACC.1	P1	10654	2467	0.0479632	0	13	Epithelial cells
P1_ACTGAGTGTGGTAACG.1	P1	25670	4439	0.0963381	0	9	Epithelial cells
P1_ACTGAGTGTTTACTCT.1	P1	29706.5	3472	0.0433912	3.36627e-05	1	Epithelial cells
P1_ACTGAGTTCAACGGCC.1	P1	10602.5	2353	0.0168828	0	6	Epithelial cells
P1_ACTGAGTTCACTTCAT.1	P1	14749	3253	0.0299681	0	22	Epithelial cells
P1_ACTGAGTTCTGCTGCT.1	P1	9652	2027	0.0498342	0.000103605	0	Epithelial cells
P1_ACTGATGAGAGAACAG.1	P1	8393.5	2171	0.0825639	0	23	B-cells
P1_ACTGATGCAAGTTAAG.1	P1	8745.5	2390	0.0927334	0	6	Epithelial cells
P1_ACTGATGCACATCTTT.1	P1	8804.5	2111	0.0927935	0	4	CD8+ T-cells
P1_ACTGATGTCCGAACGC.1	P1	11453.5	2497	0.0620771	0	0	Epithelial cells
P1_ACTGCTCAGATCTGAA.1	P1	15896	3056	0.0359839	0	15	Endothelial cells
P1_ACTGCTCAGCAACGGT.1	P1	13503.5	3059	0.0287333	0	13	Epithelial cells
P1_ACTGCTCAGGGTCGAT.1	P1	11344	1907	0.0336742	0	12	Epithelial cells
P1_ACTGCTCCAAGCCGTC.1	P1	24147.5	4153	0.0293612	0	9	Epithelial cells
P1_ACTGCTCGTACATCCA.1	P1	35416.5	4553	0.0648285	8.47063e-05	0	Epithelial cells
P1_ACTGCTCGTAGCGCTC.1	P1	13354.5	2474	0.0691153	0	24	B-cells
P1_ACTGCTCGTCTAGCGC.1	P1	33436	4620	0.0544623	0	9	Epithelial cells
P1_ACTGCTCTCGGCGCTA.1	P1	16603	3239	0.0306571	0.00018069	19	Epithelial cells
P1_ACTGCTCTCGTAGGTT.1	P1	10328	2686	0.0419249	9.68242e-05	3	CD8+ T-cells
P1_ACTGTCCCAAACCTAC.1	P1	8850	1846	0.06	0	0	Epithelial cells
P1_ACTGTCCCATGGTAGG.1	P1	13825	2277	0.0505606	0.000144665	0	Epithelial cells
P1_ACTGTCCTCGAGGTAG.1	P1	11490	2081	0.0625762	0	4	CD8+ T-cells
P1_ACTGTCCTCGGCATCG.1	P1	11860.5	1922	0.0477214	8.43135e-05	4	CD8+ T-cells
P1_ACTGTCCTCGGTTCGG.1	P1	25778.5	4556	0.044572	3.8792e-05	22	Epithelial cells
P1_ACTTACTAGCTAAACA.1	P1	9258	2084	0.0555196	0	0	Epithelial cells
P1_ACTTACTAGGACACCA.1	P1	12353	2509	0.0301951	0	1	Epithelial cells
P1_ACTTACTAGTGGTCCC.1	P1	9782.5	2285	0.0577562	0	12	Epithelial cells
P1_ACTTACTTCAACACAC.1	P1	14098.5	2795	0.0337625	0	1	Epithelial cells
P1_ACTTACTTCGCTTAGA.1	P1	9756	2246	0.0418204	0	1	Epithelial cells
P1_ACTTGTTAGAAGGTTT.1	P1	10685.5	2712	0.0705629	0	6	Epithelial cells
P1_ACTTGTTAGAGTACCG.1	P1	8647	1761	0.0448711	0	0	Epithelial cells
P1_ACTTGTTAGATACACA.1	P1	25974.5	3232	0.0669118	0	4	CD8+ T-cells
P1_ACTTGTTAGCGTCAAG.1	P1	27462	3971	0.0661277	3.6414e-05	22	Epithelial cells
P1_ACTTGTTAGGCGTACA.1	P1	28996.5	3397	0.0389357	0.000137948	1	Epithelial cells
P1_ACTTGTTAGTACGTAA.1	P1	12184.5	2378	0.0446469	0	0	Epithelial cells
P1_ACTTGTTCACACAGAG.1	P1	9654.5	2295	0.0331452	0	6	Epithelial cells
P1_ACTTGTTCACTAGTAC.1	P1	29345.5	4313	0.0671312	0	0	Epithelial cells
P1_ACTTGTTCAGTCTTCC.1	P1	14489	2621	0.0586652	0	0	Epithelial cells
P1_ACTTGTTGTAAATGAC.1	P1	16168.5	3266	0.0489841	0	12	Epithelial cells
P1_ACTTGTTGTATGCTTG.1	P1	22357	4272	0.0268372	4.47287e-05	13	Epithelial cells
P1_ACTTGTTGTCACTGGC.1	P1	13361.5	2327	0.0382442	0	1	Epithelial cells
P1_ACTTGTTGTCTAACGT.1	P1	6760	1191	0.0213018	0	6	Epithelial cells
P1_ACTTGTTGTTCGTCTC.1	P1	17182.5	3693	0.0385276	0	6	Epithelial cells
P1_ACTTGTTTCACTCCTG.1	P1	38939.5	5319	0.0508481	2.56809e-05	12	Epithelial cells
P1_ACTTGTTTCCGAGCCA.1	P1	16886.5	3749	0.0360051	0	12	Epithelial cells
P1_ACTTGTTTCTTGTTTG.1	P1	17301	3179	0.0321947	5.78001e-05	1	Epithelial cells
P1_ACTTTCACACAACGCC.1	P1	8355	2367	0.05386	0	0	Epithelial cells
P1_ACTTTCAGTAACGTTC.1	P1	7167	1947	0.0394865	0.000139528	13	Epithelial cells
P1_ACTTTCAGTCCCTTGT.1	P1	13272	2480	0.0572634	7.53466e-05	22	Epithelial cells
P1_ACTTTCATCAGAGCTT.1	P1	10196	2245	0.0370734	0	9	Epithelial cells
P1_ACTTTCATCCTTGCCA.1	P1	6746	1688	0.0160095	0	2	Fibroblasts
P1_ACTTTCATCGTGTAGT.1	P1	7264	1756	0.0697963	0	4	CD8+ T-cells
P1_AGAATAGAGAGGGCTT.1	P1	19434.5	3102	0.053616	5.14549e-05	9	Epithelial cells
P1_AGAATAGAGAGGTTAT.1	P1	13356	2856	0.077044	0	8	Monocytes
P1_AGAATAGCATATACGC.1	P1	10221	2006	0.0533216	0	0	Epithelial cells
P1_AGAATAGGTGGTTTCA.1	P1	8519	1803	0.0308722	0.000234769	2	Fibroblasts
P1_AGAATAGTCAGAGACG.1	P1	10700.5	2822	0.0653241	0.000841082	9	Epithelial cells
P1_AGACGTTAGCTACCTA.1	P1	12806	2857	0.0399813	0	5	Myofibroblasts
P1_AGACGTTAGGTAAACT.1	P1	27191	3830	0.0529587	0	0	Epithelial cells
P1_AGACGTTAGTCAATAG.1	P1	15743.5	3047	0.0662496	0	22	Epithelial cells
P1_AGACGTTGTGAGGGAG.1	P1	22980	3589	0.0769365	0	4	CD8+ T-cells
P1_AGACGTTGTTGTACAC.1	P1	9516.5	2255	0.0376189	0	1	Epithelial cells
P1_AGACGTTGTTTCCACC.1	P1	33486.5	4673	0.0586206	0	9	Epithelial cells
P1_AGACGTTTCACGCGGT.1	P1	9181.5	1392	0.0120895	0	8	Monocytes
P1_AGACGTTTCATCGATG.1	P1	8840	2271	0.0442308	0	10	Epithelial cells
P1_AGACGTTTCGGTTAAC.1	P1	12934	2553	0.0605381	0	22	Epithelial cells
P1_AGAGCGAAGCGCCTTG.1	P1	23333	4038	0.0480007	8.57155e-05	9	Epithelial cells
P1_AGAGCGACAATGAAAC.1	P1	14575.5	1854	0.0362938	0	24	B-cells
P1_AGAGCGACATCTGGTA.1	P1	9281	2117	0.0489171	0.000107747	0	Epithelial cells
P1_AGAGCGACATTTGCCC.1	P1	14610	2329	0.0696783	6.84463e-05	4	CD8+ T-cells
P1_AGAGCGAGTACTCTCC.1	P1	8013	2000	0.0401847	0	1	Epithelial cells
P1_AGAGCGAGTAGGCATG.1	P1	10773	2309	0.0487329	0	4	CD8+ T-cells
P1_AGAGCGAGTGGAAAGA.1	P1	15977	2729	0.0604619	0	0	Epithelial cells
P1_AGAGCTTAGTGCCATT.1	P1	7091	1804	0.0713581	0	4	CD8+ T-cells
P1_AGAGCTTAGTGTACGG.1	P1	12619	2176	0.0669625	0	22	Epithelial cells
P1_AGAGCTTCATTATCTC.1	P1	6623.5	1647	0.026723	0	2	Fibroblasts
P1_AGAGCTTGTCGGCTCA.1	P1	6572	1689	0.0415399	0	15	Endothelial cells
P1_AGAGCTTGTGCGAAAC.1	P1	9132	2184	0.0839904	0	4	CD8+ T-cells
P1_AGAGCTTTCTGCTGTC.1	P1	8821	2313	0.0252806	0	6	Epithelial cells
P1_AGAGTGGAGCGGATCA.1	P1	17310	3096	0.0589255	0	12	Epithelial cells
P1_AGAGTGGCACGGACAA.1	P1	7041	1637	0.0813805	0	4	CD8+ T-cells
P1_AGAGTGGCATCACCCT.1	P1	7308	1904	0.0321565	0	21	Macrophages
P1_AGAGTGGGTCATACTG.1	P1	9962	1711	0.0413572	0.000100381	12	Epithelial cells
P1_AGAGTGGGTCTTCGTC.1	P1	7664	1974	0.0330115	0	6	Epithelial cells
P1_AGAGTGGTCAACGAAA.1	P1	7359.5	1948	0.0421224	0	6	Epithelial cells
P1_AGAGTGGTCTGAGTGT.1	P1	17535.5	2955	0.0682045	0	4	CD8+ T-cells
P1_AGAGTGGTCTTGTATC.1	P1	14464	2450	0.0531665	6.91372e-05	23	B-cells
P1_AGATCTGAGTAGGCCA.1	P1	10928	2313	0.0761347	9.15081e-05	4	CD8+ T-cells
P1_AGATCTGCAGTCAGCC.1	P1	11882	1930	0.0427537	0	12	Epithelial cells
P1_AGATCTGCATAGAAAC.1	P1	6693	1458	0.0403407	0	12	Epithelial cells
P1_AGATCTGGTACAGCAG.1	P1	12263	2948	0.0300905	8.15461e-05	13	Epithelial cells
P1_AGATCTGGTCGGGTCT.1	P1	7956	1066	0.010181	0	24	B-cells
P1_AGATCTGGTCTCTTTA.1	P1	7860.5	2037	0.0295147	0.000254437	17	Endothelial cells
P1_AGATCTGGTGCACCAC.1	P1	15598	2425	0.0730222	0	4	CD8+ T-cells
P1_AGATCTGGTGGTTTCA.1	P1	13125	2833	0.0535619	0	9	Epithelial cells
P1_AGATCTGGTTTCGCTC.1	P1	7738	2041	0.0407082	0	22	Epithelial cells
P1_AGATCTGTCCTGCTTG.1	P1	10241.5	2175	0.0678612	0	4	CD8+ T-cells
P1_AGATCTGTCGGGAGTA.1	P1	14905.5	3024	0.0854718	0	8	Monocytes
P1_AGATCTGTCTTTCCTC.1	P1	14347.5	3476	0.0160307	0	13	Epithelial cells
P1_AGATTGCAGAGCTATA.1	P1	8638.5	782	0.0142386	0	24	B-cells
P1_AGATTGCAGCTAACTC.1	P1	21674.5	4123	0.0405546	4.61372e-05	6	Epithelial cells
P1_AGATTGCAGTTGCAGG.1	P1	9982	2137	0.0363655	0.00010018	0	Epithelial cells
P1_AGATTGCCACAGACAG.1	P1	11131	2746	0.0233582	0	10	Epithelial cells
P1_AGATTGCCATCATCCC.1	P1	6506	2048	0.068091	0	31	Endothelial cells
P1_AGATTGCCATCCGCGA.1	P1	9957	2210	0.0748217	0.000100432	4	CD8+ T-cells
P1_AGATTGCGTAGCTGCC.1	P1	15092.5	2525	0.0794434	6.62581e-05	4	CD8+ T-cells
P1_AGATTGCGTCCGAACC.1	P1	14934	2498	0.0615374	0	0	Epithelial cells
P1_AGATTGCTCAATCACG.1	P1	8736	1755	0.046131	0	0	Epithelial cells
P1_AGATTGCTCAGCTCGG.1	P1	17542	3069	0.0362558	5.7006e-05	12	Epithelial cells
P1_AGATTGCTCCCGACTT.1	P1	19222	3599	0.0354282	0	20	Fibroblasts
P1_AGATTGCTCCTTCAAT.1	P1	13624.5	2669	0.0593049	0	11	Epithelial cells
P1_AGATTGCTCTCGCTTG.1	P1	21151	3570	0.0698312	9.45582e-05	9	Epithelial cells
P1_AGATTGCTCTGATTCT.1	P1	9812	2569	0.0226254	0	2	Fibroblasts
P1_AGCAGCCAGGAGCGTT.1	P1	27401.5	3898	0.0605806	0.000109483	0	Epithelial cells
P1_AGCAGCCAGTTAGCGG.1	P1	14145	3167	0.0424178	0	5	Myofibroblasts
P1_AGCAGCCCAAACTGTC.1	P1	14674	2953	0.0535641	6.81477e-05	19	Epithelial cells
P1_AGCAGCCCAACGCACC.1	P1	14339	2916	0.0407281	0	6	Epithelial cells
P1_AGCAGCCCAGATGGCA.1	P1	7671	2000	0.0578803	0	9	Epithelial cells
P1_AGCAGCCCAGGTCCAC.1	P1	6946	1929	0.0607544	0	3	CD8+ T-cells
P1_AGCAGCCGTAAGCACG.1	P1	13666	2911	0.0510757	0	8	Monocytes
P1_AGCAGCCGTTGCGTTA.1	P1	9715	1935	0.0395265	0	10	Epithelial cells
P1_AGCAGCCTCAGTCAGT.1	P1	6854	1687	0.0304931	0	6	Epithelial cells
P1_AGCAGCCTCATACGGT.1	P1	7139	1600	0.0336182	0	20	Fibroblasts
P1_AGCAGCCTCCACTGGG.1	P1	20839.5	4179	0.0255284	4.79858e-05	13	Epithelial cells
P1_AGCAGCCTCCAGGGCT.1	P1	8685	2210	0.052274	0	6	Epithelial cells
P1_AGCAGCCTCGTAGGTT.1	P1	13128.5	2950	0.0380089	0	13	Epithelial cells
P1_AGCATACAGACCGGAT.1	P1	14676.5	2930	0.0819678	0	12	Epithelial cells
P1_AGCATACAGGAGCGAG.1	P1	10952	2274	0.0493974	0	15	Endothelial cells
P1_AGCATACAGGCATTGG.1	P1	22864	4056	0.044874	4.37369e-05	12	Epithelial cells
P1_AGCATACAGTTAGCGG.1	P1	7922	1942	0.0318101	0.000126231	13	Epithelial cells
P1_AGCATACCAGTATCTG.1	P1	12950.5	2755	0.0677966	0	8	Monocytes
P1_AGCATACCATCAGTCA.1	P1	17332	3767	0.0356566	0	13	Epithelial cells
P1_AGCATACGTAAGTGTA.1	P1	17222	3848	0.0342004	5.80653e-05	13	Epithelial cells
P1_AGCATACGTGGTCCGT.1	P1	9084	2167	0.0488771	0	15	Endothelial cells
P1_AGCATACGTTGACGTT.1	P1	10250.5	2339	0.0725818	0	22	Epithelial cells
P1_AGCATACGTTGATTGC.1	P1	11953	2868	0.0718648	0	0	Epithelial cells
P1_AGCATACTCAATCACG.1	P1	14212.5	2983	0.0538962	0	9	Epithelial cells
P1_AGCCTAAAGCTACCTA.1	P1	20617	3454	0.0358442	4.85037e-05	1	Epithelial cells
P1_AGCCTAAAGGGCATGT.1	P1	19429	3454	0.0522415	0	0	Epithelial cells
P1_AGCCTAAAGTCCAGGA.1	P1	10304.5	2221	0.0628851	0	4	CD8+ T-cells
P1_AGCCTAAAGTGGTAAT.1	P1	35625.5	4084	0.0475221	0	0	Epithelial cells
P1_AGCCTAACAATAGAGT.1	P1	7399	2072	0.0448709	0	12	Epithelial cells
P1_AGCCTAACACATCCGG.1	P1	11396	2414	0.0483503	0	3	CD8+ T-cells
P1_AGCCTAACACCACGTG.1	P1	13183.5	2471	0.0687223	0	4	CD8+ T-cells
P1_AGCCTAACATCAGTAC.1	P1	6553.5	1797	0.0299077	0	32	Macrophages
P1_AGCCTAACATGTTCCC.1	P1	11973.5	2534	0.0552888	0.000167036	10	Epithelial cells
P1_AGCCTAAGTGGGTCAA.1	P1	13173	2905	0.0534426	0	5	Myofibroblasts
P1_AGCCTAATCACGCGGT.1	P1	12483.5	2913	0.0761806	8.01057e-05	0	Epithelial cells
P1_AGCCTAATCATCATTC.1	P1	7992.5	2373	0.0399124	0	13	Epithelial cells
P1_AGCCTAATCGAGAGCA.1	P1	21926	3744	0.05514	0	32	Macrophages
P1_AGCCTAATCTTCCTTC.1	P1	13146	2672	0.0451088	0	1	Epithelial cells
P1_AGCGGTCAGATCCCAT.1	P1	16641	3071	0.0355147	0	0	Epithelial cells
P1_AGCGGTCAGCTGATAA.1	P1	7453.5	1059	0.013014	0	24	B-cells
P1_AGCGGTCAGGAGTACC.1	P1	22484.5	3272	0.0490115	0	9	Epithelial cells
P1_AGCGGTCAGGCTCAGA.1	P1	18669	3428	0.0448337	0	13	Epithelial cells
P1_AGCGGTCAGGGAGTAA.1	P1	16751	3097	0.0581458	0	12	Epithelial cells
P1_AGCGGTCAGTGAAGAG.1	P1	12108	2363	0.0740007	0	4	CD8+ T-cells
P1_AGCGGTCCAAAGCAAT.1	P1	11543	2297	0.0528459	8.66326e-05	7	Mast
P1_AGCGGTCTCACATACG.1	P1	13002.5	2871	0.0686791	0	19	Epithelial cells
P1_AGCGGTCTCACCCTCA.1	P1	7738	1942	0.0324373	0	19	Epithelial cells
P1_AGCGTATAGCCCAGCT.1	P1	26370	3557	0.0588927	0	8	Monocytes
P1_AGCGTATCACTTCTGC.1	P1	31217	4818	0.0550341	0	12	Epithelial cells
P1_AGCGTATGTGACGGTA.1	P1	6474	1764	0.0511276	0	32	Macrophages
P1_AGCGTATTCAGCGATT.1	P1	13921.5	2570	0.0567468	0	0	Epithelial cells
P1_AGCGTCGAGACTAAGT.1	P1	14257	2129	0.0573753	7.0141e-05	4	CD8+ T-cells
P1_AGCGTCGGTACCGTAT.1	P1	6784	1395	0.031987	0.000147406	12	Epithelial cells
P1_AGCGTCGTCGGTGTCG.1	P1	11218	2733	0.0509003	0.000178285	12	Epithelial cells
P1_AGCTCCTAGACCACGA.1	P1	12635.5	2645	0.048435	7.91421e-05	1	Epithelial cells
P1_AGCTCCTAGAGACGAA.1	P1	7485	1590	0.0495658	0	6	Epithelial cells
P1_AGCTCCTAGGCTCTTA.1	P1	14407	3101	0.0344277	0	22	Epithelial cells
P1_AGCTCCTAGTACGACG.1	P1	17041.5	3047	0.0810375	0	3	CD8+ T-cells
P1_AGCTCCTCAACTGGCC.1	P1	14985	3110	0.0211545	6.67334e-05	5	Myofibroblasts
P1_AGCTCCTTCACCTTAT.1	P1	8095	2126	0.0773317	0	4	CD8+ T-cells
P1_AGCTCCTTCTGAAAGA.1	P1	23959.5	4035	0.0592667	0	12	Epithelial cells
P1_AGCTCCTTCTGATTCT.1	P1	8353.5	2606	0.0811636	0	31	Endothelial cells
P1_AGCTCTCAGCAATATG.1	P1	12877.5	3019	0.0478354	0	22	Epithelial cells
P1_AGCTCTCCAAGGTGTG.1	P1	14155	3454	0.0438008	0.000211939	2	Fibroblasts
P1_AGCTCTCCACGGTGTC.1	P1	11208	2290	0.0521949	0	0	Epithelial cells
P1_AGCTCTCCATGGTTGT.1	P1	15069	3002	0.0237574	6.63614e-05	8	Macrophages
P1_AGCTCTCGTGGTAACG.1	P1	37262.5	4305	0.0629587	0	0	Epithelial cells
P1_AGCTCTCTCCAAATGC.1	P1	6968.5	1758	0.0555356	0	10	Epithelial cells
P1_AGCTCTCTCCCACTTG.1	P1	15486.5	2629	0.0434572	0.000129145	12	Epithelial cells
P1_AGCTCTCTCGTGGACC.1	P1	15175.5	2581	0.049883	0	3	CD8+ T-cells
P1_AGCTCTCTCTTGTACT.1	P1	10034.5	2196	0.0532164	9.96562e-05	12	Epithelial cells
P1_AGCTTGAAGCGTTCCG.1	P1	8029	2018	0.0485739	0	0	Epithelial cells
P1_AGCTTGAAGTGCGTGA.1	P1	10046	2235	0.0446944	0	0	Epithelial cells
P1_AGCTTGAGTCCCGACA.1	P1	28887.5	3599	0.0685418	6.92341e-05	4	CD8+ T-cells
P1_AGCTTGAGTGAGGCTA.1	P1	12418	2404	0.0564503	0	12	Epithelial cells
P1_AGCTTGAGTTCCGGCA.1	P1	12688	2882	0.0348361	0	6	Epithelial cells
P1_AGCTTGAGTTCTGTTT.1	P1	7512	1532	0.01877	0	2	Fibroblasts
P1_AGCTTGATCCTCAATT.1	P1	8759.5	2035	0.0512586	0	5	Myofibroblasts
P1_AGCTTGATCTTTCCTC.1	P1	14566.5	3201	0.0679642	0	9	Epithelial cells
P1_AGGCCACCAAGTTGTC.1	P1	12372	2865	0.047365	8.08277e-05	20	Fibroblasts
P1_AGGCCACCATGTAAGA.1	P1	9387	2031	0.066901	0	4	CD8+ T-cells
P1_AGGCCACGTCCCTTGT.1	P1	21450.5	3674	0.0503019	4.6619e-05	9	Epithelial cells
P1_AGGCCACGTCCGAATT.1	P1	12477.5	2428	0.0349429	0.000160289	1	Epithelial cells
P1_AGGCCACGTCGTGGCT.1	P1	7526	1726	0.0660377	0	0	Epithelial cells
P1_AGGCCACGTTCGCTAA.1	P1	17315.5	3056	0.0832202	0	4	CD8+ T-cells
P1_AGGCCACTCGTCGTTC.1	P1	22977	3864	0.0597554	4.35218e-05	22	Epithelial cells
P1_AGGCCACTCGTGGACC.1	P1	9548	2159	0.0369711	0.000104734	13	Epithelial cells
P1_AGGCCGTAGAGTAATC.1	P1	12271	2568	0.0585119	8.1493e-05	12	Epithelial cells
P1_AGGCCGTAGCCTTGAT.1	P1	13376.5	2949	0.0681045	0	12	Epithelial cells
P1_AGGCCGTAGGTGCTAG.1	P1	11182	2139	0.0607226	8.94294e-05	23	B-cells
P1_AGGCCGTGTACCGCTG.1	P1	8472	2026	0.0601983	0.000118036	3	CD8+ T-cells
P1_AGGCCGTTCAGGCAAG.1	P1	25865.5	4237	0.0416771	7.73231e-05	12	Epithelial cells
P1_AGGCCGTTCGTTACGA.1	P1	8397	2406	0.0533524	0	9	Epithelial cells
P1_AGGGAGTAGATCACGG.1	P1	9380	2142	0.0683369	0	12	Epithelial cells
P1_AGGGAGTAGCGGATCA.1	P1	13687	2492	0.0481479	0	1	Epithelial cells
P1_AGGGAGTAGGCTAGGT.1	P1	6518	1764	0.0573796	0.000153421	32	Macrophages
P1_AGGGAGTAGTCCCACG.1	P1	12972	2937	0.0514955	7.70891e-05	12	Epithelial cells
P1_AGGGAGTCACGGCTAC.1	P1	13918.5	2807	0.0740022	0	15	Endothelial cells
P1_AGGGAGTGTAGAAAGG.1	P1	14980	2894	0.050534	0	12	Epithelial cells
P1_AGGGAGTGTAGCGCTC.1	P1	7991.5	2165	0.0855909	0	20	Fibroblasts
P1_AGGGAGTGTGGAAAGA.1	P1	6488	1978	0.0379162	0.000308261	21	Macrophages
P1_AGGGAGTGTTACGTCA.1	P1	8131.5	2325	0.0319744	0	13	Epithelial cells
P1_AGGGAGTTCACGACTA.1	P1	7263	2633	0.0391023	0	17	Endothelial cells
P1_AGGGAGTTCAGTCCCT.1	P1	7382.5	1696	0.0709787	0	4	CD8+ T-cells
P1_AGGGAGTTCTGTTGAG.1	P1	15521	3066	0.0307326	0	6	Epithelial cells
P1_AGGGATGAGCCTCGTG.1	P1	8527	1944	0.0250968	0.000117275	17	Endothelial cells
P1_AGGGATGAGGTGACCA.1	P1	6568	1841	0.0280146	0	6	Epithelial cells
P1_AGGGATGCAAAGGAAG.1	P1	13175	2801	0.0811385	7.59013e-05	4	CD8+ T-cells
P1_AGGGATGCACATCCGG.1	P1	11290	2308	0.0480071	8.8574e-05	19	Epithelial cells
P1_AGGGATGCAGGTCGTC.1	P1	23263.5	4045	0.0795237	4.29858e-05	33	Epithelial cells
P1_AGGGATGCATGCCCGA.1	P1	27337	4012	0.0782822	0	9	Epithelial cells
P1_AGGGATGGTAAGTAGT.1	P1	23250	3422	0.0525161	4.30108e-05	8	Monocytes
P1_AGGGATGGTGATGTGG.1	P1	16523	3134	0.0390365	0	1	Epithelial cells
P1_AGGGATGTCAACGGGA.1	P1	11883	2356	0.0789363	0	4	CD8+ T-cells
P1_AGGGTGAAGGAGCGAG.1	P1	7508	1227	0.0249068	0.000133191	24	B-cells
P1_AGGGTGACATTGTGCA.1	P1	6665	1730	0.0295574	0	6	Epithelial cells
P1_AGGGTGAGTAGGGACT.1	P1	18797.5	3316	0.0568693	0	9	Epithelial cells
P1_AGGGTGAGTCGGCATC.1	P1	8377	2037	0.076519	0	6	Epithelial cells
P1_AGGGTGATCAACTCTT.1	P1	14304.5	2704	0.0537593	0	22	Epithelial cells
P1_AGGGTGATCGGTCTAA.1	P1	12678	2716	0.073592	7.88768e-05	9	Epithelial cells
P1_AGGTCATAGAATTCCC.1	P1	7870	2175	0.0377382	0	13	Epithelial cells
P1_AGGTCATAGAGGACGG.1	P1	12949	3161	0.0498108	0	12	Epithelial cells
P1_AGGTCATAGCGTTGCC.1	P1	7298.5	1687	0.0996095	0	3	CD8+ T-cells
P1_AGGTCATCAAGGCTCC.1	P1	10382	2319	0.0752264	0	4	CD8+ T-cells
P1_AGGTCATCAGCTTCGG.1	P1	11619	2563	0.0337378	0	13	Epithelial cells
P1_AGGTCATCAGGACCCT.1	P1	9684	2530	0.0486369	0.000103263	22	Epithelial cells
P1_AGGTCATGTGTGACCC.1	P1	7320.5	1736	0.0259545	0	24	B-cells
P1_AGGTCATGTTGTCGCG.1	P1	19976	3139	0.0473068	0	0	Epithelial cells
P1_AGGTCATTCAATCACG.1	P1	6490	1747	0.0751926	0	4	CD8+ T-cells
P1_AGGTCATTCTGCAAGT.1	P1	9196	2412	0.0748151	0	3	CD8+ T-cells
P1_AGGTCCGAGCAGGTCA.1	P1	17149.5	2995	0.075629	0	0	Epithelial cells
P1_AGGTCCGCACAGGTTT.1	P1	9776	2322	0.0763093	0	9	Epithelial cells
P1_AGGTCCGCACGTAAGG.1	P1	23170	3787	0.0458351	4.31593e-05	0	Epithelial cells
P1_AGGTCCGGTTTGGGCC.1	P1	7755.5	2050	0.0419057	0	6	Epithelial cells
P1_AGGTCCGTCAATACCG.1	P1	8948.5	2285	0.0558753	0.000111751	6	Epithelial cells
P1_AGGTCCGTCCTGCAGG.1	P1	17141	3002	0.0386209	0	19	Epithelial cells
P1_AGTAGTCAGTTTAGGA.1	P1	37925	4361	0.04588	0	12	Epithelial cells
P1_AGTAGTCCAAACTGTC.1	P1	13926.5	2697	0.0626862	7.18056e-05	3	CD8+ T-cells
P1_AGTAGTCGTAAGTAGT.1	P1	10200	2836	0.0502941	0	22	Epithelial cells
P1_AGTAGTCTCAACTCTT.1	P1	17867.5	3014	0.0560235	5.59675e-05	0	Epithelial cells
P1_AGTAGTCTCGCCTGAG.1	P1	13604	2707	0.0548368	7.35078e-05	15	Endothelial cells
P1_AGTAGTCTCTGTCCGT.1	P1	12299.5	2689	0.0563438	0	10	Epithelial cells
P1_AGTCTTTAGACTGGGT.1	P1	22764.5	3520	0.0431813	0	6	Epithelial cells
P1_AGTCTTTCAATCCAAC.1	P1	9461.5	2379	0.0579189	0.000105691	12	Epithelial cells
P1_AGTCTTTGTCCCGACA.1	P1	11023.5	2695	0.0314782	9.07153e-05	13	Epithelial cells
P1_AGTCTTTGTGAAAGAG.1	P1	14710	3048	0.0540449	0	22	Epithelial cells
P1_AGTCTTTTCCTGTACC.1	P1	8507	2051	0.018808	0.00011755	10	Epithelial cells
P1_AGTGAGGAGCGTCTAT.1	P1	17194	3191	0.0543794	5.81598e-05	12	Epithelial cells
P1_AGTGAGGAGCTGTCTA.1	P1	7918	1921	0.0255115	0	15	Endothelial cells
P1_AGTGAGGCACCTCGGA.1	P1	10396.5	2431	0.0663685	0	22	Epithelial cells
P1_AGTGAGGCAGTCAGAG.1	P1	17008.5	3214	0.0707293	0	9	Epithelial cells
P1_AGTGAGGGTTAAGGGC.1	P1	14228	2644	0.0736576	0.0271999	2	Fibroblasts
P1_AGTGAGGGTTATCCGA.1	P1	17534	3658	0.0620509	0	12	Epithelial cells
P1_AGTGAGGTCCGTAGTA.1	P1	15944.5	2862	0.0729405	0.000125435	3	CD8+ T-cells
P1_AGTGAGGTCCTTTCGG.1	P1	10237	2516	0.041223	0.00019537	6	Epithelial cells
P1_AGTGAGGTCGCCAAAT.1	P1	15489	2455	0.0493899	0	12	Epithelial cells
P1_AGTGGGAAGGGAAACA.1	P1	10232.5	2465	0.031957	0	6	Epithelial cells
P1_AGTGGGACAAAGTCAA.1	P1	10472.5	2577	0.0354261	0	32	Macrophages
P1_AGTGGGAGTAGCCTAT.1	P1	7033.5	2130	0.0339802	0	13	Epithelial cells
P1_AGTGGGAGTATAAACG.1	P1	33251.5	4119	0.0540427	6.01477e-05	12	Epithelial cells
P1_AGTGGGAGTCCTCCAT.1	P1	8757.5	2248	0.0380246	0	13	Epithelial cells
P1_AGTGGGAGTCTGCCAG.1	P1	18981.5	3565	0.052999	0	12	Epithelial cells
P1_AGTGGGATCAAAGTAG.1	P1	9849.5	2089	0.0538098	0	4	CD8+ T-cells
P1_AGTGTCAAGAATGTTG.1	P1	10647	2115	0.0313703	9.39232e-05	12	Epithelial cells
P1_AGTGTCACAAGGACTG.1	P1	6702	1573	0.055655	0	4	CD8+ T-cells
P1_AGTGTCACAATGAATG.1	P1	14097	3068	0.0677449	0	6	Epithelial cells
P1_AGTGTCACACACTGCG.1	P1	22685	3462	0.0540445	8.8164e-05	0	Epithelial cells
P1_AGTGTCACAGGACGTA.1	P1	19220	3769	0.0423517	0	13	Epithelial cells
P1_AGTGTCAGTAAGAGAG.1	P1	7975.5	1993	0.0406244	0	6	Epithelial cells
P1_AGTGTCAGTCGGCACT.1	P1	8174	1837	0.0681429	0	4	CD8+ T-cells
P1_AGTGTCAGTCTAGAGG.1	P1	8131	2197	0.0334522	0.000122986	32	Macrophages
P1_AGTGTCAGTTCAGACT.1	P1	15393.5	3098	0.0367038	0	10	Epithelial cells
P1_AGTGTCATCTACTATC.1	P1	6688	1395	0.0545754	0.0110646	12	Epithelial cells
P1_AGTTGGTAGGGTGTGT.1	P1	14063	2811	0.0618645	0	8	Monocytes
P1_AGTTGGTAGTAATCCC.1	P1	14100.5	2801	0.0657423	0	22	Epithelial cells
P1_AGTTGGTCAATACGCT.1	P1	10440	2514	0.0600575	0	4	CD8+ T-cells
P1_AGTTGGTGTCGAGATG.1	P1	6803	2099	0.0467441	0.000146994	13	Epithelial cells
P1_AGTTGGTGTTAGGGTG.1	P1	11657.5	2431	0.0434913	0	22	Epithelial cells
P1_AGTTGGTGTTCCATGA.1	P1	17464	2964	0.0767865	0	4	CD8+ T-cells
P1_ATAACGCAGGAATCGC.1	P1	11249.5	2286	0.072981	0	4	CD8+ T-cells
P1_ATAACGCAGTCCATAC.1	P1	33059	4265	0.0235034	0	6	Epithelial cells
P1_ATAACGCAGTGCAAGC.1	P1	15900	3216	0.0305031	0	22	Epithelial cells
P1_ATAACGCAGTGGTAAT.1	P1	6774	2075	0.0314438	0	32	Macrophages
P1_ATAACGCCACGAAACG.1	P1	16600	3420	0.0218072	0	12	Epithelial cells
P1_ATAACGCCACTGCCAG.1	P1	6521.5	1647	0.0368013	0	6	Epithelial cells
P1_ATAACGCGTATTCGTG.1	P1	9478.5	2640	0.0483199	0.000105502	32	Macrophages
P1_ATAACGCGTCATATCG.1	P1	11532	2533	0.0440513	0	6	Epithelial cells
P1_ATAACGCTCGATAGAA.1	P1	16117	3216	0.0620463	0	20	Fibroblasts
P1_ATAACGCTCTGGGCCA.1	P1	7873.5	2246	0.030609	0.000127008	13	Epithelial cells
P1_ATAAGAGAGCCAACAG.1	P1	12394.5	2191	0.0377587	8.06809e-05	12	Epithelial cells
P1_ATAAGAGAGGAATTAC.1	P1	6844	2196	0.0891292	0	2	Fibroblasts
P1_ATAAGAGCAACGATCT.1	P1	19008.5	3595	0.0447694	5.2608e-05	22	Epithelial cells
P1_ATAAGAGCATCGGGTC.1	P1	9485	2535	0.0681075	0.00010543	6	Epithelial cells
P1_ATAAGAGGTAAACACA.1	P1	6822	1920	0.0231604	0	13	Epithelial cells
P1_ATAAGAGTCCAGAGGA.1	P1	20679	3670	0.0486	0	6	Epithelial cells
P1_ATAAGAGTCCATTCTA.1	P1	10438	2549	0.0637095	0.000191608	0	Epithelial cells
P1_ATAAGAGTCGCCAAAT.1	P1	17995.5	2709	0.0519574	5.55694e-05	12	Epithelial cells
P1_ATAAGAGTCGCCGTGA.1	P1	36009	4116	0.0515982	0	0	Epithelial cells
P1_ATAGACCAGATGTGTA.1	P1	12118	2787	0.0561974	0	22	Epithelial cells
P1_ATAGACCAGATTACCC.1	P1	15868	3253	0.0620116	0	2	Fibroblasts
P1_ATAGACCAGGAGTTGC.1	P1	7535	1706	0.0571997	0.000132714	4	CD8+ T-cells
P1_ATAGACCCAATGGATA.1	P1	7507	2034	0.0484881	0	6	Epithelial cells
P1_ATAGACCCACCCTATC.1	P1	6997.5	1736	0.0341551	0	1	Epithelial cells
P1_ATAGACCCAGACACTT.1	P1	12617.5	2447	0.0389935	0.00015851	1	Epithelial cells
P1_ATAGACCCAGTATGCT.1	P1	7542	1802	0.061257	0	0	Epithelial cells
P1_ATAGACCCATGTAGTC.1	P1	14361.5	2469	0.0619016	0	4	CD8+ T-cells
P1_ATAGACCGTCCTGCTT.1	P1	9816	2193	0.0649959	0	4	CD8+ T-cells
P1_ATAGACCGTTAAGAAC.1	P1	7875.5	2614	0.0275538	0	17	Endothelial cells
P1_ATAGACCGTTCCGGCA.1	P1	14063.5	3149	0.0600846	7.11061e-05	0	Epithelial cells
P1_ATAGACCTCAGCTGGC.1	P1	12729.5	2364	0.0581327	0	0	Epithelial cells
P1_ATAGACCTCTGGCGTG.1	P1	9103	2399	0.0409755	0.000109854	8	Macrophages
P1_ATCACGAAGAAGAAGC.1	P1	14103.5	3253	0.0601978	0	20	Fibroblasts
P1_ATCACGAAGGTGATTA.1	P1	11503	2708	0.0310354	0.000173868	13	Epithelial cells
P1_ATCACGAAGTACGCCC.1	P1	13387	2812	0.042728	0	11	Epithelial cells
P1_ATCACGACAAGCCGCT.1	P1	13286	2835	0.0499022	0.000150534	9	Epithelial cells
P1_ATCACGACAGCTCGAC.1	P1	7282	2117	0.0462785	0	24	B-cells
P1_ATCACGACAGTGACAG.1	P1	22584.5	3828	0.0507428	0	22	Epithelial cells
P1_ATCACGAGTACATGTC.1	P1	10272.5	2335	0.0752495	0	24	B-cells
P1_ATCACGAGTGACAAAT.1	P1	7382	1675	0.028854	0.000135465	10	Epithelial cells
P1_ATCACGAGTGGTTTCA.1	P1	28444	4964	0.0348755	0	5	Myofibroblasts
P1_ATCACGATCCTAGAAC.1	P1	7456	2185	0.0316524	0	32	Macrophages
P1_ATCATCTAGTTACGGG.1	P1	11770.5	2021	0.030415	8.49582e-05	12	Epithelial cells
P1_ATCATCTCAGGTGGAT.1	P1	18982	4065	0.0539985	5.26815e-05	6	Epithelial cells
P1_ATCATCTCATAACCTG.1	P1	8030.5	2316	0.049561	0.0128261	3	CD8+ T-cells
P1_ATCATCTTCCTAAGTG.1	P1	10893	2541	0.0294685	0.000275406	13	Epithelial cells
P1_ATCATCTTCGGTGTCG.1	P1	6468.5	1023	0.0233439	0	24	B-cells
P1_ATCATGGAGTGGAGTC.1	P1	28240.5	4115	0.041182	3.54101e-05	19	Epithelial cells
P1_ATCATGGAGTTGAGTA.1	P1	6987	1944	0.0413625	0.000143123	2	Fibroblasts
P1_ATCATGGCACACATGT.1	P1	9771	2064	0.0709242	0	3	CD8+ T-cells
P1_ATCATGGCACACCGCA.1	P1	12531	2677	0.0644801	0	20	Fibroblasts
P1_ATCATGGGTGCGGTAA.1	P1	11272	2252	0.0555358	8.87154e-05	4	CD8+ T-cells
P1_ATCATGGTCGTTTAGG.1	P1	8931	2417	0.0565446	0	8	Monocytes
P1_ATCCACCAGAGTAAGG.1	P1	16610.5	2560	0.0254658	0	12	Epithelial cells
P1_ATCCACCAGGGTGTGT.1	P1	10870	2397	0.0668813	0	22	Epithelial cells
P1_ATCCACCAGGGTTTCT.1	P1	29466	3903	0.0399443	3.39374e-05	0	Epithelial cells
P1_ATCCACCAGTGGGCTA.1	P1	13425.5	2625	0.0536293	0	5	Myofibroblasts
P1_ATCCACCCAACACCTA.1	P1	13873.5	3020	0.0594659	0	20	Fibroblasts
P1_ATCCACCCACGAGGTA.1	P1	15828	2506	0.0757518	6.31792e-05	3	CD8+ T-cells
P1_ATCCACCGTTGAGTTC.1	P1	10815	2199	0.0447527	0	0	Epithelial cells
P1_ATCCACCTCAGCTGGC.1	P1	19345	3831	0.0530887	0	20	Fibroblasts
P1_ATCCACCTCCAATGGT.1	P1	7384.5	2005	0.0667615	0	4	CD8+ T-cells
P1_ATCCGAAAGATCCCGC.1	P1	12179	2191	0.0679038	0	4	CD8+ T-cells
P1_ATCCGAAAGCGTTCCG.1	P1	15272.5	3268	0.0371256	0	12	Epithelial cells
P1_ATCCGAAAGGGATGGG.1	P1	16648.5	2798	0.0457699	0	12	Epithelial cells
P1_ATCCGAACAAACGTGG.1	P1	7999	2022	0.0853857	0	4	CD8+ T-cells
P1_ATCCGAACAAAGGAAG.1	P1	28896.5	4096	0.0523939	0.000103819	15	Endothelial cells
P1_ATCCGAACATCACGAT.1	P1	8194	2165	0.0485721	0	0	Epithelial cells
P1_ATCCGAAGTGCCTGCA.1	P1	10628.5	2664	0.031519	0	13	Epithelial cells
P1_ATCCGAAGTTCCAACA.1	P1	15129	2647	0.0598189	0	22	Epithelial cells
P1_ATCCGAATCCAAAGTC.1	P1	22017.5	3522	0.0498694	4.54184e-05	1	Epithelial cells
P1_ATCCGAATCCCGGATG.1	P1	10449	2719	0.0199062	0	2	Fibroblasts
P1_ATCCGAATCGGAAACG.1	P1	20693	3456	0.0808969	0	4	CD8+ T-cells
P1_ATCCGAATCTGGTATG.1	P1	8536.5	1805	0.0475605	0	12	Epithelial cells
P1_ATCGAGTAGACTAGAT.1	P1	10942	1980	0.061232	0	4	CD8+ T-cells
P1_ATCGAGTAGATCGGGT.1	P1	10774	2164	0.0382402	0.000185632	1	Epithelial cells
P1_ATCGAGTAGGATGGAA.1	P1	20607	2820	0.0416849	4.85272e-05	12	Epithelial cells
P1_ATCGAGTCAAGCGATG.1	P1	7690.5	2075	0.0518822	0	12	Epithelial cells
P1_ATCGAGTGTCCAGTTA.1	P1	28170	4885	0.0410366	0	12	Epithelial cells
P1_ATCGAGTTCTGGAGCC.1	P1	11258.5	2427	0.0650175	0.000177644	22	Epithelial cells
P1_ATCTACTAGTCTTGCA.1	P1	12539	2328	0.0473722	0	12	Epithelial cells
P1_ATCTACTCAACCGCCA.1	P1	8754	2066	0.0772218	0.000114233	3	CD8+ T-cells
P1_ATCTACTCAGACAAGC.1	P1	20627.5	4157	0.0642346	0	12	Epithelial cells
P1_ATCTACTCAGGGTACA.1	P1	10744.5	2779	0.0309926	0	20	Epithelial cells
P1_ATCTACTCATAACCTG.1	P1	11706	2867	0.0335725	0.000170853	1	Epithelial cells
P1_ATCTACTCATGAACCT.1	P1	18900	3686	0.0527513	5.29101e-05	19	Epithelial cells
P1_ATCTACTGTAAAGTCA.1	P1	7129	2181	0.0315612	0	2	Fibroblasts
P1_ATCTACTTCCAAACAC.1	P1	6577.5	2058	0.0244774	0	2	Fibroblasts
P1_ATCTACTTCCAACCAA.1	P1	14859.5	3550	0.048723	0	20	Myofibroblasts
P1_ATCTACTTCTCCGGTT.1	P1	10273	2258	0.0560693	0	9	Epithelial cells
P1_ATCTGCCCACTTGGAT.1	P1	7351.5	2394	0.0546827	0	20	Fibroblasts
P1_ATCTGCCCAGACAGGT.1	P1	6638	1607	0.0334438	0	0	Epithelial cells
P1_ATCTGCCCAGTATGCT.1	P1	34555	4453	0.0275792	0	12	Epithelial cells
P1_ATCTGCCGTACTTCTT.1	P1	8241.5	2095	0.0487775	0.000121337	22	Epithelial cells
P1_ATCTGCCGTTCTGGTA.1	P1	14840	2818	0.0477089	6.73854e-05	22	Epithelial cells
P1_ATCTGCCTCAGTGTTG.1	P1	7823.5	2382	0.0449927	0.00012782	17	Endothelial cells
P1_ATCTGCCTCGCCATAA.1	P1	9435.5	1992	0.0483281	0.000105983	0	Epithelial cells
P1_ATGAGGGCACATTCGA.1	P1	6583.5	1904	0.0232399	0	13	Epithelial cells
P1_ATGAGGGGTAAATGTG.1	P1	14627.5	2278	0.0472398	0	0	Epithelial cells
P1_ATGCGATAGACTCGGA.1	P1	7384	1931	0.0358884	0.000135428	13	Epithelial cells
P1_ATGCGATAGAGCTATA.1	P1	20304	3307	0.0517632	0	22	Epithelial cells
P1_ATGCGATAGAGTACCG.1	P1	12436.5	2493	0.0753427	0	4	CD8+ T-cells
P1_ATGCGATCACCACCAG.1	P1	11618	2162	0.0349458	8.60733e-05	6	Epithelial cells
P1_ATGCGATGTCGACTGC.1	P1	10913	2269	0.0617612	9.16338e-05	4	CD8+ T-cells
P1_ATGCGATGTCTTGCGG.1	P1	27062.5	3621	0.0368406	7.3903e-05	0	Epithelial cells
P1_ATGCGATTCACCGGGT.1	P1	10808	2275	0.0593079	0	12	Epithelial cells
P1_ATGCGATTCTCAACTT.1	P1	22074	4147	0.0228323	0	13	Epithelial cells
P1_ATGCGATTCTGTTTGT.1	P1	10816	2400	0.0674926	9.24556e-05	4	CD8+ T-cells
P1_ATGCGATTCTTCGAGA.1	P1	6564	1902	0.0284887	0	2	Fibroblasts
P1_ATGGGAGAGTACGACG.1	P1	13975	2807	0.0827907	7.15564e-05	4	CD8+ T-cells
P1_ATGGGAGGTAAGCACG.1	P1	29672	3880	0.047924	3.37018e-05	0	Epithelial cells
P1_ATGGGAGGTGCTTCTC.1	P1	8171	2282	0.0357361	0	21	Macrophages
P1_ATGGGAGTCCTTTCTC.1	P1	28759.5	4137	0.0455154	0	12	Epithelial cells
P1_ATGGGAGTCTACCTGC.1	P1	13829	2516	0.0602357	7.23118e-05	0	Epithelial cells
P1_ATGGGAGTCTATCCTA.1	P1	11507	2825	0.0621361	8.69036e-05	5	Myofibroblasts
P1_ATGTGTGCAAGTTCTG.1	P1	10476	2724	0.0702558	9.54563e-05	8	Monocytes
P1_ATGTGTGCACACTGCG.1	P1	19543	3658	0.0572584	0	0	Epithelial cells
P1_ATGTGTGGTTAAGTAG.1	P1	13461.5	2770	0.061583	0.000148572	22	Epithelial cells
P1_ATGTGTGGTTCCACAA.1	P1	10209	2138	0.0366343	0	12	Epithelial cells
P1_ATTACTCCACATGGGA.1	P1	7089	1951	0.0380872	0	12	Epithelial cells
P1_ATTACTCCATGCTGGC.1	P1	39755.5	4021	0.0448743	5.03075e-05	0	Epithelial cells
P1_ATTACTCGTGAGCGAT.1	P1	13121.5	3162	0.0301033	7.62108e-05	13	Epithelial cells
P1_ATTACTCGTTACCGAT.1	P1	10068	1634	0.0150973	0	15	Endothelial cells
P1_ATTACTCTCCTAGGGC.1	P1	10113.5	2134	0.0544816	0	0	Epithelial cells
P1_ATTATCCAGCATCATC.1	P1	7123	1639	0.0470307	0	0	Epithelial cells
P1_ATTATCCAGGCATGGT.1	P1	24974.5	4091	0.0565377	0	10	Epithelial cells
P1_ATTATCCCACCAGCAC.1	P1	12640	2861	0.0517405	0	4	CD8+ T-cells
P1_ATTATCCCAGACGCCT.1	P1	7049	1703	0.0307845	0	12	Epithelial cells
P1_ATTATCCCAGGCAGTA.1	P1	16188	3209	0.074685	0	9	Epithelial cells
P1_ATTATCCGTGCACGAA.1	P1	23887.5	3533	0.0473888	0	0	Epithelial cells
P1_ATTATCCTCAATCTCT.1	P1	18998	3596	0.0334772	0.000105274	12	Epithelial cells
P1_ATTATCCTCACGCATA.1	P1	12824	3054	0.029242	7.79788e-05	20	Epithelial cells
P1_ATTATCCTCGGTGTTA.1	P1	11931	2079	0.0960523	0	3	CD8+ T-cells
P1_ATTCTACAGTGGACGT.1	P1	18482.5	2840	0.0587042	5.41052e-05	9	Epithelial cells
P1_ATTCTACGTCGGGTCT.1	P1	22702	3634	0.0518897	0	4	CD8+ T-cells
P1_ATTCTACTCCGTTGTC.1	P1	21797	2841	0.0542276	0	0	Epithelial cells
P1_ATTCTACTCGCAAGCC.1	P1	11669	2292	0.0456766	0	0	Epithelial cells
P1_ATTCTACTCGTGGACC.1	P1	15724	3301	0.0585729	0.000127194	22	Epithelial cells
P1_ATTGGACCAAGCCTAT.1	P1	11110.5	2419	0.0486027	0	3	CD8+ T-cells
P1_ATTGGACCAAGGACTG.1	P1	11237	2441	0.065053	0	6	Epithelial cells
P1_ATTGGACCAGACAAAT.1	P1	13735	2793	0.0449945	0	8	Monocytes
P1_ATTGGACGTGGTAACG.1	P1	14115	3276	0.0340064	7.08466e-05	13	Epithelial cells
P1_ATTGGACTCTAACTCT.1	P1	6955	1579	0.0339324	0.000143781	12	Epithelial cells
P1_ATTGGTGAGCGTTTAC.1	P1	10672.5	2567	0.059405	0.00121808	12	Epithelial cells
P1_ATTGGTGAGGCATTGG.1	P1	9856	2459	0.0499188	0	15	Endothelial cells
P1_ATTGGTGCACATCTTT.1	P1	22959.5	3284	0.0294867	0	9	Epithelial cells
P1_ATTGGTGCATTATCTC.1	P1	22630	4199	0.0454264	0	5	Myofibroblasts
P1_ATTGGTGGTTCAGGCC.1	P1	16198.5	2979	0.0449424	6.17341e-05	19	Epithelial cells
P1_ATTGGTGTCGGCATCG.1	P1	13231	2619	0.0470864	0	0	Epithelial cells
P1_ATTTCTGAGAATTCCC.1	P1	9410.5	2325	0.0347484	0.000106264	6	Epithelial cells
P1_ATTTCTGAGAGAACAG.1	P1	6616	2043	0.0344619	0	17	Endothelial cells
P1_ATTTCTGAGAGGTACC.1	P1	26637.5	4381	0.0609291	0	8	Monocytes
P1_ATTTCTGAGGACGAAA.1	P1	6877	2105	0.0554021	0	12	Epithelial cells
P1_ATTTCTGAGGAGTTGC.1	P1	13219.5	3025	0.0674761	0	3	CD8+ T-cells
P1_ATTTCTGAGGGTGTGT.1	P1	7335	1399	0.0362645	0	6	Epithelial cells
P1_ATTTCTGAGTCAAGGC.1	P1	22483.5	3423	0.0420753	0	0	Epithelial cells
P1_ATTTCTGCACGTCTCT.1	P1	7523	2130	0.0457264	0	9	Epithelial cells
P1_ATTTCTGGTCCCTACT.1	P1	8506	2359	0.0283329	0.000235128	32	Macrophages
P1_ATTTCTGGTGCGATAG.1	P1	7293	1925	0.0388043	0.000137118	15	Endothelial cells
P1_ATTTCTGGTTCTGTTT.1	P1	9841	2426	0.029875	0	20	Epithelial cells
P1_CAACCAAAGATCACGG.1	P1	24056.5	3599	0.0497579	0	20	Fibroblasts
P1_CAACCAAAGCGATGAC.1	P1	19376	3518	0.0621903	0	9	Epithelial cells
P1_CAACCAACATCGGTTA.1	P1	13015	2765	0.0443335	7.68344e-05	12	Epithelial cells
P1_CAACCAAGTTTGGGCC.1	P1	9005	2175	0.0420877	0	20	Fibroblasts
P1_CAACCAATCATGCATG.1	P1	6569.5	1907	0.0377502	0.000152219	19	Epithelial cells
P1_CAACCAATCCGCGCAA.1	P1	7749	2185	0.0338108	0	2	Fibroblasts
P1_CAACCAATCCTAAGTG.1	P1	23610	3343	0.080305	4.23549e-05	9	Epithelial cells
P1_CAACCAATCGCATGGC.1	P1	36257	4742	0.042116	0	22	Epithelial cells
P1_CAACCTCAGAAGATTC.1	P1	7239	2063	0.0227932	0	2	Fibroblasts
P1_CAACCTCAGAGCTTCT.1	P1	23404	3794	0.049436	4.27277e-05	9	Epithelial cells
P1_CAACCTCAGATACACA.1	P1	6843	1978	0.0508549	0	19	Epithelial cells
P1_CAACCTCAGGGTGTTG.1	P1	11072	2330	0.0450686	0	3	CD8+ T-cells
P1_CAACCTCCAAACGCGA.1	P1	22925	3714	0.0587132	0	8	Monocytes
P1_CAACCTCCAAGTCATC.1	P1	11988	2515	0.0195195	0	1	Epithelial cells
P1_CAACCTCCACGTCAGC.1	P1	6623	1809	0.0315567	0.000150989	8	Macrophages
P1_CAACCTCGTTCGCGAC.1	P1	17299.5	2819	0.0548571	0	0	Epithelial cells
P1_CAACCTCTCAATCACG.1	P1	13251.5	2605	0.025582	7.54632e-05	10	Epithelial cells
P1_CAACCTCTCCTTGCCA.1	P1	7834.5	2030	0.0541196	0.000127641	0	Epithelial cells
P1_CAACCTCTCTTCATGT.1	P1	12583	3008	0.0336963	0	13	Epithelial cells
P1_CAACTAGAGCCCAATT.1	P1	12361	2893	0.0438476	0	22	Epithelial cells
P1_CAACTAGCACCAGTTA.1	P1	16030	3247	0.0680599	0	0	Epithelial cells
P1_CAACTAGCAGCTGGCT.1	P1	7172.5	1336	0.0153364	0	8	Monocytes
P1_CAACTAGGTATTCGTG.1	P1	7995	2008	0.0474046	0	5	Myofibroblasts
P1_CAACTAGGTGTGCGTC.1	P1	7275	2058	0.0284536	0	10	Epithelial cells
P1_CAACTAGGTTCTGGTA.1	P1	35149.5	4453	0.0240686	2.84499e-05	1	Epithelial cells
P1_CAACTAGTCAAGCCTA.1	P1	24689.5	4008	0.0438648	0	19	Epithelial cells
P1_CAACTAGTCATTGCCC.1	P1	12224.5	2404	0.0557078	0	0	Epithelial cells
P1_CAAGAAAAGAATGTTG.1	P1	9071	2211	0.0541285	0	6	Epithelial cells
P1_CAAGAAAAGACGCACA.1	P1	9184	1823	0.0638066	0	4	CD8+ T-cells
P1_CAAGAAAAGAGGTTGC.1	P1	12326	2847	0.0552491	0	6	Epithelial cells
P1_CAAGAAAAGCTATGCT.1	P1	7355.5	1843	0.0485351	0	6	Epithelial cells
P1_CAAGAAACAAGCGTAG.1	P1	14797.5	2635	0.084744	0	4	CD8+ T-cells
P1_CAAGAAAGTGCACCAC.1	P1	13665	2884	0.0483718	0	5	Myofibroblasts
P1_CAAGATCAGAGTACAT.1	P1	9960	2467	0.0291165	0	6	Epithelial cells
P1_CAAGATCAGGATCGCA.1	P1	12189	2602	0.0488145	8.20412e-05	0	Epithelial cells
P1_CAAGATCAGGCATGGT.1	P1	9293	1838	0.0627354	0.000215216	22	Epithelial cells
P1_CAAGATCAGTGAATTG.1	P1	9761	2284	0.0969163	0	4	CD8+ T-cells
P1_CAAGATCAGTGGTAAT.1	P1	12334	2821	0.0735366	8.10767e-05	9	Epithelial cells
P1_CAAGATCCAACTGCTA.1	P1	15139	3143	0.0172402	0	12	Epithelial cells
P1_CAAGATCCAAGTAATG.1	P1	6662	1942	0.0363254	0	6	Epithelial cells
P1_CAAGATCCACCGGAAA.1	P1	14717	3289	0.0421961	0	13	Epithelial cells
P1_CAAGATCGTAAATACG.1	P1	17279.5	3424	0.0608814	5.7872e-05	22	Epithelial cells
P1_CAAGATCGTGCAACTT.1	P1	11290	2302	0.0446413	8.8574e-05	0	Epithelial cells
P1_CAAGGCCAGAGTAATC.1	P1	12332	3232	0.0303276	0	2	Fibroblasts
P1_CAAGGCCCAGCTGCTG.1	P1	20797.5	3973	0.0878952	0	0	Epithelial cells
P1_CAAGGCCTCATATCGG.1	P1	14239.5	3452	0.064609	7.02272e-05	10	Epithelial cells
P1_CAAGTTGAGAGGTTAT.1	P1	9944	2329	0.0580249	0	6	Epithelial cells
P1_CAAGTTGCAACTGCTA.1	P1	32665.5	4770	0.0254091	0.000673493	12	Epithelial cells
P1_CAAGTTGCATGCCCGA.1	P1	17410	3212	0.0725445	0	0	Epithelial cells
P1_CAAGTTGGTACCAGTT.1	P1	26793.5	3850	0.0422864	3.73225e-05	12	Epithelial cells
P1_CAAGTTGGTTGGTGGA.1	P1	12265	2422	0.0493274	8.15328e-05	8	Macrophages
P1_CAAGTTGGTTGGTTTG.1	P1	10513.5	2573	0.0856042	0	7	Mast
P1_CAAGTTGTCACATGCA.1	P1	10823	2605	0.0486002	0	22	Epithelial cells
P1_CAAGTTGTCACCTCGT.1	P1	19517	3189	0.0585131	5.12374e-05	12	Epithelial cells
P1_CACAAACCACATGACT.1	P1	11122.5	2178	0.0510677	8.99078e-05	28	Epithelial cells
P1_CACAAACGTAAGAGAG.1	P1	31808.5	4129	0.0315953	0	12	Epithelial cells
P1_CACAAACGTCTGATTG.1	P1	7516	1871	0.0230176	0.000266099	1	Epithelial cells
P1_CACAAACTCAGCTTAG.1	P1	23289.5	4258	0.0595118	0	12	Epithelial cells
P1_CACAAACTCTGCTTGC.1	P1	7942.5	1888	0.0401637	0.000125905	6	Epithelial cells
P1_CACAAACTCTGTGCAA.1	P1	14095	3140	0.0427102	0	6	Epithelial cells
P1_CACACAAAGCCCAATT.1	P1	7305	1617	0.0247775	0	6	Epithelial cells
P1_CACACAAAGGCTCAGA.1	P1	23300	4208	0.087897	0	9	Epithelial cells
P1_CACACAAAGGTCGGAT.1	P1	8874	2356	0.0416948	0	13	Epithelial cells
P1_CACACAAAGTGTTAGA.1	P1	23515	3651	0.0577504	4.2526e-05	0	Epithelial cells
P1_CACACAAAGTTCGATC.1	P1	17114	2985	0.0342994	5.84317e-05	19	Epithelial cells
P1_CACACAAGTTTAGGAA.1	P1	12754.5	2775	0.05943	0	22	Epithelial cells
P1_CACACAATCGGCGGTT.1	P1	15557	2879	0.0381822	0	1	Epithelial cells
P1_CACACCTCAGACACTT.1	P1	16318	2742	0.0421007	0	8	Monocytes
P1_CACACCTCAGCCAATT.1	P1	10802	2490	0.0274023	0	13	Epithelial cells
P1_CACACCTCAGGATTGG.1	P1	10942	2931	0.0632426	0	6	Epithelial cells
P1_CACACCTCAGGCTCAC.1	P1	11270	2473	0.0559894	8.87311e-05	4	CD8+ T-cells
P1_CACACCTCAGTGGAGT.1	P1	6733.5	1830	0.0487117	0.000148511	21	Macrophages
P1_CACACCTGTACCGTTA.1	P1	11346	2595	0.045743	0	1	Epithelial cells
P1_CACACCTGTAGAAGGA.1	P1	13543.5	2602	0.052719	0.000147672	0	Epithelial cells
P1_CACACCTTCAACACCA.1	P1	13675.5	2848	0.0531608	0	5	Myofibroblasts
P1_CACACCTTCGCCCTTA.1	P1	30103.5	4449	0.0483333	3.32187e-05	8	Monocytes
P1_CACACCTTCTGTCTCG.1	P1	10127	2422	0.0347586	0	20	Epithelial cells
P1_CACACTCAGTGGTCCC.1	P1	28761.5	4370	0.0648089	3.47687e-05	9	Epithelial cells
P1_CACACTCCACTATCTT.1	P1	17218.5	4037	0.0540698	0	9	Epithelial cells
P1_CACACTCTCACGACTA.1	P1	21130	3163	0.0527212	0	0	Epithelial cells
P1_CACACTCTCTTCAACT.1	P1	12451	2776	0.0440928	0	6	Epithelial cells
P1_CACAGGCAGACAGACC.1	P1	8336	2026	0.043906	0	10	Epithelial cells
P1_CACAGGCCAACACCTA.1	P1	25123.5	4176	0.0585906	0	9	Epithelial cells
P1_CACAGGCCAACTGCGC.1	P1	12674	2617	0.0501815	7.89017e-05	0	Epithelial cells
P1_CACAGGCCACCCATTC.1	P1	7742.5	2196	0.0289312	0	13	Epithelial cells
P1_CACAGGCCATCACGAT.1	P1	7341	771	0.0170277	0	24	B-cells
P1_CACAGGCCATCGGAAG.1	P1	25484	3531	0.02531	0	12	Epithelial cells
P1_CACAGGCGTACTTGAC.1	P1	14281	2536	0.0593796	7.00231e-05	0	Epithelial cells
P1_CACAGGCGTCCCTACT.1	P1	14417	2733	0.0855934	0	4	CD8+ T-cells
P1_CACAGTAAGAAGAAGC.1	P1	17073	2904	0.0210859	0	2	Fibroblasts
P1_CACAGTAAGATCTGCT.1	P1	38991	5005	0.0700162	0	0	Epithelial cells
P1_CACAGTAAGATGCCTT.1	P1	9665.5	2309	0.0333144	0.000103461	6	Epithelial cells
P1_CACAGTAAGCCGGTAA.1	P1	8388.5	2134	0.0309948	0.000238422	1	Epithelial cells
P1_CACAGTAAGGTGGGTT.1	P1	11761	2377	0.0564578	0	0	Epithelial cells
P1_CACAGTAAGTTATCGC.1	P1	14987.5	2646	0.0327606	6.67223e-05	19	Epithelial cells
P1_CACAGTACAAGACGTG.1	P1	14950	3404	0.0395318	0	12	Epithelial cells
P1_CACAGTATCAACTCTT.1	P1	10488.5	2334	0.0612099	0	0	Epithelial cells
P1_CACAGTATCCTTTCTC.1	P1	6666	1802	0.0309031	0.000150015	3	CD8+ T-cells
P1_CACAGTATCGGCGCAT.1	P1	9294.5	2066	0.0865028	0	14	CD8+ T-cells
P1_CACAGTATCGGTGTCG.1	P1	26571	4035	0.0430168	0	6	Epithelial cells
P1_CACATAGGTCCAACTA.1	P1	8319.5	2210	0.0241601	0	13	Epithelial cells
P1_CACATAGGTCCGTGAC.1	P1	12208	2615	0.0536533	0	22	Epithelial cells
P1_CACATAGTCATCACCC.1	P1	11785.5	2863	0.0252853	0	6	Epithelial cells
P1_CACATAGTCTCATTCA.1	P1	26084	3902	0.0607269	0	9	Epithelial cells
P1_CACATTTCACAGTCGC.1	P1	18289	3099	0.0340095	0	24	B-cells
P1_CACATTTTCAAACAAG.1	P1	8434	2027	0.0405502	0.000237135	15	Endothelial cells
P1_CACATTTTCAGTCCCT.1	P1	17551	2906	0.0429035	0	0	Epithelial cells
P1_CACATTTTCTCTTATG.1	P1	6530	2070	0.0301685	0	6	Endothelial cells
P1_CACCACTCAAGGGTCA.1	P1	12677.5	2887	0.0514297	0	22	Epithelial cells
P1_CACCACTGTCCTGCTT.1	P1	7768	2048	0.0409372	0	12	Epithelial cells
P1_CACCACTGTGCATCTA.1	P1	10323	2222	0.0483387	9.68711e-05	12	Epithelial cells
P1_CACCACTGTTTGACAC.1	P1	6607	1062	0.0517633	0.000302709	4	CD8+ T-cells
P1_CACCACTTCCCAACGG.1	P1	13657.5	2588	0.0383672	0	1	Epithelial cells
P1_CACCAGGAGCGTTGCC.1	P1	9537.5	1859	0.0500131	0	12	Epithelial cells
P1_CACCAGGCATGTTCCC.1	P1	19143.5	3301	0.0693186	0	9	Epithelial cells
P1_CACCAGGGTCCGCTGA.1	P1	8969	1775	0.035121	0.000111495	12	Epithelial cells
P1_CACCAGGGTCTAGAGG.1	P1	12116	2907	0.0608287	0	12	Epithelial cells
P1_CACCAGGTCTTAACCT.1	P1	7709	2134	0.051628	0	1	Epithelial cells
P1_CACCAGGTCTTGCAAG.1	P1	20122	3167	0.0617732	4.96968e-05	0	Epithelial cells
P1_CACCAGGTCTTGTACT.1	P1	11671	2736	0.0676891	8.56825e-05	6	Epithelial cells
P1_CACCAGGTCTTGTATC.1	P1	14838.5	2682	0.0502072	0	22	Epithelial cells
P1_CACCTTGAGACCGGAT.1	P1	9016	1751	0.0523514	0	0	Epithelial cells
P1_CACCTTGAGCTGGAAC.1	P1	24006.5	3632	0.0314498	0	12	Epithelial cells
P1_CACCTTGAGGATATAC.1	P1	10514.5	2551	0.0328118	0	6	Epithelial cells
P1_CACCTTGCACTCGACG.1	P1	12105	2397	0.0611318	0	0	Epithelial cells
P1_CACCTTGCAGACGCCT.1	P1	13194	2498	0.0344096	7.5792e-05	1	Epithelial cells
P1_CACCTTGCAGGATTGG.1	P1	6686	1982	0.0435238	0.000299133	18	Epithelial cells
P1_CACCTTGCAGTTAACC.1	P1	7083.5	1744	0.0354345	0.000141173	0	Epithelial cells
P1_CACCTTGGTAGCGTGA.1	P1	11746.5	2410	0.0422253	0	12	Epithelial cells
P1_CACCTTGGTGTAAGTA.1	P1	8834.5	2102	0.0502575	0	12	Epithelial cells
P1_CACCTTGGTTTGTTTC.1	P1	23421.5	3695	0.0566146	4.26958e-05	22	Epithelial cells
P1_CACCTTGTCCCGGATG.1	P1	8841	1948	0.0580251	0.000452438	4	CD8+ T-cells
P1_CACCTTGTCGCGCCAA.1	P1	7584.5	2236	0.0370492	0	2	Fibroblasts
P1_CACCTTGTCTCCAGGG.1	P1	17582	3103	0.0717211	5.68764e-05	12	Epithelial cells
P1_CACTCCAAGCCTTGAT.1	P1	11900.5	2630	0.0794084	8.40301e-05	3	CD8+ T-cells
P1_CACTCCACAAAGTGCG.1	P1	32610	4731	0.0579883	3.06654e-05	9	Epithelial cells
P1_CACTCCACACCAACCG.1	P1	9229	2383	0.0534186	0	12	Epithelial cells
P1_CACTCCACATCCCATC.1	P1	35096.5	4514	0.0489223	2.84929e-05	12	Epithelial cells
P1_CACTCCAGTTCCACTC.1	P1	9847	1992	0.0366609	0	20	Fibroblasts
P1_CACTCCATCTGTGCAA.1	P1	25896	4916	0.0251776	0	6	Epithelial cells
P1_CAGAATCAGAACTCGG.1	P1	13202.5	3010	0.0740011	7.57432e-05	0	Epithelial cells
P1_CAGAATCAGAGTACAT.1	P1	28232	3833	0.0511122	0	0	Epithelial cells
P1_CAGAATCAGAGTCGGT.1	P1	10797	2397	0.0396406	9.26183e-05	6	Epithelial cells
P1_CAGAATCAGGGATACC.1	P1	8129	2025	0.0669209	0	12	Epithelial cells
P1_CAGAATCAGTGGGTTG.1	P1	8125	1912	0.0307692	0	13	Epithelial cells
P1_CAGAATCCATTGGCGC.1	P1	6802	1754	0.0901206	0	6	Epithelial cells
P1_CAGAATCGTTCAGTAC.1	P1	11202	2617	0.0412426	8.92698e-05	0	Epithelial cells
P1_CAGAATCTCACTATTC.1	P1	13628	2693	0.0442471	0	12	Epithelial cells
P1_CAGAATCTCCTCAACC.1	P1	7242	2248	0.0335543	0	32	Macrophages
P1_CAGAATCTCGAGGTAG.1	P1	8697.5	2505	0.0379419	0	2	Fibroblasts
P1_CAGAGAGGTTCGAATC.1	P1	12535	3156	0.0344635	0	8	Monocytes
P1_CAGATCAAGAAGAAGC.1	P1	7742	2072	0.0320331	0	6	Epithelial cells
P1_CAGATCAAGACACGAC.1	P1	16435	2948	0.0613325	0	22	Epithelial cells
P1_CAGATCAAGAGTAATC.1	P1	7266	2081	0.061657	0.000137627	0	Epithelial cells
P1_CAGATCAAGATGTGTA.1	P1	25036	3406	0.0488497	3.99425e-05	12	Epithelial cells
P1_CAGATCAAGCTCAACT.1	P1	30842	5018	0.0536606	0	6	Epithelial cells
P1_CAGATCAAGGCATGTG.1	P1	19221	3277	0.0903179	0	9	Epithelial cells
P1_CAGATCACAACACGCC.1	P1	14081.5	2939	0.0832298	0	9	Epithelial cells
P1_CAGATCACACTCGACG.1	P1	11990.5	2778	0.0483716	0	10	Epithelial cells
P1_CAGATCACAGGGCATA.1	P1	9417.5	1874	0.0579772	0.000318556	4	CD8+ T-cells
P1_CAGATCACAGTTTACG.1	P1	10597	2400	0.0478437	0	22	Epithelial cells
P1_CAGATCACATCCGTGG.1	P1	18560	2744	0.0423491	5.38793e-05	24	B-cells
P1_CAGATCAGTTTGACAC.1	P1	28823.5	3521	0.0538103	0	0	Epithelial cells
P1_CAGATCATCCTCATTA.1	P1	13995.5	2911	0.0430853	0	12	Epithelial cells
P1_CAGCAGCAGAAGGGTA.1	P1	11588.5	2576	0.0674807	0	4	CD8+ T-cells
P1_CAGCAGCAGCCGGTAA.1	P1	15096.5	2671	0.0502103	0	0	Epithelial cells
P1_CAGCAGCAGGCAAAGA.1	P1	19265.5	3390	0.0662843	0	9	Epithelial cells
P1_CAGCAGCAGGTGCACA.1	P1	11388	2479	0.0518089	0	8	Monocytes
P1_CAGCAGCCAAACCTAC.1	P1	16472.5	2453	0.0487479	0	3	CD8+ T-cells
P1_CAGCAGCCACGCTTTC.1	P1	12543	2892	0.0568445	0	2	Fibroblasts
P1_CAGCAGCCACGTAAGG.1	P1	9353	1693	0.0563456	0.000106918	4	CD8+ T-cells
P1_CAGCAGCCAGTATCTG.1	P1	19263.5	3368	0.0513406	0	0	Epithelial cells
P1_CAGCAGCGTCAGAGGT.1	P1	18054	3038	0.0869613	0	9	Epithelial cells
P1_CAGCAGCGTCGCTTCT.1	P1	11440	2685	0.0597028	8.74126e-05	9	Epithelial cells
P1_CAGCAGCGTCTCGTTC.1	P1	15706	2706	0.0527824	0	12	Epithelial cells
P1_CAGCAGCTCACCCTCA.1	P1	15625	2728	0.035648	0	12	Epithelial cells
P1_CAGCAGCTCTGTACGA.1	P1	6899	1565	0.0172489	0	2	Fibroblasts
P1_CAGCATAAGTTGAGTA.1	P1	26500.5	4017	0.0650554	3.77351e-05	9	Epithelial cells
P1_CAGCATACAAACAACA.1	P1	7066.5	1892	0.0408972	0	8	Macrophages
P1_CAGCATACAGAGTGTG.1	P1	7459	1884	0.036466	0.000134066	10	Epithelial cells
P1_CAGCATAGTACCCAAT.1	P1	11945	2792	0.0452072	0	9	Epithelial cells
P1_CAGCATATCCACGTTC.1	P1	15256.5	2676	0.0290368	0	12	Epithelial cells
P1_CAGCATATCGGCGCTA.1	P1	31045	4258	0.0493155	3.22113e-05	1	Epithelial cells
P1_CAGCCGAAGAACTCGG.1	P1	29623.5	4296	0.0538761	0.000168785	9	Epithelial cells
P1_CAGCCGAAGAACTGTA.1	P1	11982	2570	0.0464864	0	1	Epithelial cells
P1_CAGCCGAAGGTGTTAA.1	P1	11341.5	2698	0.0335053	0	20	Myofibroblasts
P1_CAGCCGACAATAGAGT.1	P1	7543.5	1953	0.0628356	0	3	CD8+ T-cells
P1_CAGCCGACATAAGACA.1	P1	31326.5	4438	0.0220261	0	13	Epithelial cells
P1_CAGCCGAGTCAAACTC.1	P1	8832	1885	0.048913	0	8	Macrophages
P1_CAGCCGAGTGCAGTAG.1	P1	7225.5	2178	0.0441492	0	6	Epithelial cells
P1_CAGCCGAGTGGGTATG.1	P1	13187.5	2706	0.0548246	0	12	Epithelial cells
P1_CAGCCGATCCCTCTTT.1	P1	12795	2798	0.0382962	0	9	Epithelial cells
P1_CAGCCGATCTTCGAGA.1	P1	8754.5	2463	0.0400937	0	12	Epithelial cells
P1_CAGCGACAGAGCTGGT.1	P1	18457.5	3326	0.0563457	0	22	Epithelial cells
P1_CAGCGACAGTACACCT.1	P1	13575	2744	0.0743278	0	22	Epithelial cells
P1_CAGCGACCAAACGTGG.1	P1	15807	2644	0.0659202	0	4	CD8+ T-cells
P1_CAGCGACCACATTCGA.1	P1	11138	2694	0.064464	0	4	CD8+ T-cells
P1_CAGCGACCATAGAAAC.1	P1	7521	2165	0.0247308	0	2	Fibroblasts
P1_CAGCGACGTGATAAAC.1	P1	13500	2468	0.0602963	0.000148148	9	Epithelial cells
P1_CAGCGACGTTCGCGAC.1	P1	14149	2317	0.0298961	0.000141353	12	Epithelial cells
P1_CAGCGACTCCTCAATT.1	P1	7947.5	1931	0.0333438	0	32	Macrophages
P1_CAGCGACTCGTATCAG.1	P1	7644.5	1856	0.0401596	0	1	Epithelial cells
P1_CAGCGACTCTACTATC.1	P1	12463	2381	0.03041	0	12	Epithelial cells
P1_CAGCTAAAGATCGGGT.1	P1	24008.5	4079	0.0618947	0	22	Epithelial cells
P1_CAGCTAAAGCGCTTAT.1	P1	14745	2480	0.0460495	6.78196e-05	22	Epithelial cells
P1_CAGCTAAAGGTCATCT.1	P1	13945.5	2507	0.0523466	0	0	Epithelial cells
P1_CAGCTAACACTGCCAG.1	P1	30969.5	3868	0.0508565	0	0	Epithelial cells
P1_CAGCTAACAGTGAGTG.1	P1	25150.5	4097	0.0451283	3.97606e-05	12	Epithelial cells
P1_CAGCTAACATACCATG.1	P1	10256	2152	0.0227184	0.000195008	6	Epithelial cells
P1_CAGCTAACATGGTCTA.1	P1	26781.5	4352	0.0272576	3.73392e-05	10	Epithelial cells
P1_CAGCTAAGTCATTAGC.1	P1	10583	2759	0.0447888	0	12	Epithelial cells
P1_CAGCTAAGTTGAGTTC.1	P1	9665	1961	0.0359027	0.000103466	0	Epithelial cells
P1_CAGCTAATCAGGTTCA.1	P1	7379	677	0.00745358	0	24	B-cells
P1_CAGCTAATCGTGTAGT.1	P1	7588	2099	0.0312335	0	32	Macrophages
P1_CAGCTGGAGAAACCAT.1	P1	13933	2619	0.0753607	7.17721e-05	4	CD8+ T-cells
P1_CAGCTGGAGACCACGA.1	P1	17956	3011	0.0447204	5.56917e-05	1	Epithelial cells
P1_CAGCTGGAGCGCCTCA.1	P1	9940.5	2453	0.0525124	0.000100599	3	CD8+ T-cells
P1_CAGCTGGAGCGCTTAT.1	P1	14876.5	2825	0.0713205	0	3	CD8+ T-cells
P1_CAGCTGGAGTACTTGC.1	P1	6723.5	1944	0.0630624	0	17	Endothelial cells
P1_CAGCTGGCAGCGATCC.1	P1	12039.5	2185	0.0365464	0	0	Epithelial cells
P1_CAGCTGGGTACGCACC.1	P1	15240.5	2906	0.0659427	0	0	Epithelial cells
P1_CAGCTGGGTGAGGGTT.1	P1	13312	3138	0.0551382	0	0	Epithelial cells
P1_CAGCTGGTCAGGTAAA.1	P1	11787	2903	0.0436074	8.48392e-05	22	Epithelial cells
P1_CAGCTGGTCTGCGTAA.1	P1	12458	2843	0.0511318	0	6	Epithelial cells
P1_CAGGTGCAGAGTGAGA.1	P1	7568	2145	0.0379228	0	13	Epithelial cells
P1_CAGGTGCAGATATACG.1	P1	13080	2856	0.0574159	0	22	Epithelial cells
P1_CAGGTGCCAGGTCGTC.1	P1	8531	1964	0.0464189	0.00011722	0	Epithelial cells
P1_CAGGTGCGTCCGAACC.1	P1	19882	3604	0.0228347	0	17	Endothelial cells
P1_CAGGTGCGTTGTCTTT.1	P1	13651	2694	0.0716431	0	6	Epithelial cells
P1_CAGGTGCTCGCATGAT.1	P1	30715.5	5005	0.0252641	3.25569e-05	13	Epithelial cells
P1_CAGTAACAGAAACCTA.1	P1	11078.5	2520	0.0741978	0	0	Epithelial cells
P1_CAGTAACAGAAGGTGA.1	P1	6511	1653	0.024881	0	6	Epithelial cells
P1_CAGTAACAGAATCTCC.1	P1	20332	3932	0.0687094	0	9	Epithelial cells
P1_CAGTAACAGCCCTAAT.1	P1	6910	2172	0.046165	0	13	Epithelial cells
P1_CAGTAACAGCTTCGCG.1	P1	9714	1438	0.0191476	0	8	Monocytes
P1_CAGTAACAGTCTCCTC.1	P1	17028	3195	0.0506225	0	0	Epithelial cells
P1_CAGTAACGTACAGTGG.1	P1	14122.5	2840	0.051903	0	6	Epithelial cells
P1_CAGTAACGTAGCGTCC.1	P1	9973	1995	0.0780106	0.000100271	4	CD8+ T-cells
P1_CAGTAACGTCTAAAGA.1	P1	18662	3185	0.0379916	5.35848e-05	15	Endothelial cells
P1_CAGTAACGTTGGTTTG.1	P1	16251	3081	0.046151	0	0	Epithelial cells
P1_CAGTAACTCACTGGGC.1	P1	13543.5	2272	0.0580352	7.38362e-05	0	Epithelial cells
P1_CAGTAACTCACTTCAT.1	P1	11093.5	2969	0.0442602	9.01429e-05	13	Epithelial cells
P1_CAGTAACTCCGAGCCA.1	P1	12417	2728	0.0600789	0	0	Epithelial cells
P1_CAGTAACTCTAGCACA.1	P1	26324	3673	0.0413691	3.79881e-05	0	Epithelial cells
P1_CAGTAACTCTCCGGTT.1	P1	13143	2952	0.0401735	7.60861e-05	6	Epithelial cells
P1_CAGTCCTAGAAACCGC.1	P1	11798	2351	0.058654	0	0	Epithelial cells
P1_CATATGGAGAATCTCC.1	P1	19442	2918	0.0408394	0	0	Epithelial cells
P1_CATATGGAGAGGTACC.1	P1	14166	2443	0.0432726	0.00529437	12	Epithelial cells
P1_CATATGGAGCCCAATT.1	P1	38331	5403	0.0558295	5.21771e-05	12	Epithelial cells
P1_CATATGGAGGCAATTA.1	P1	10912.5	2820	0.0661627	9.1638e-05	19	Epithelial cells
P1_CATATGGCACAGACAG.1	P1	9649	2461	0.053788	0	12	Epithelial cells
P1_CATATGGCACCGATAT.1	P1	11542	2608	0.0326633	0.00017328	1	Epithelial cells
P1_CATATGGGTCGTTGTA.1	P1	19259.5	3959	0.0576339	0	22	Epithelial cells
P1_CATATGGTCAGTTAGC.1	P1	10510	2475	0.0446242	0	22	Epithelial cells
P1_CATATGGTCCCAGGTG.1	P1	8629.5	2094	0.0462367	0.000115882	22	Epithelial cells
P1_CATATGGTCTGATTCT.1	P1	10248	2325	0.0458626	0	0	Epithelial cells
P1_CATATTCAGATAGTCA.1	P1	8870	2203	0.0534386	0	1	Epithelial cells
P1_CATATTCCAGGATCGA.1	P1	6502	1728	0.0455245	0	22	Epithelial cells
P1_CATATTCCATCACGAT.1	P1	10574	2646	0.0394364	0	6	Epithelial cells
P1_CATATTCGTACACCGC.1	P1	24981.5	3558	0.0622461	0	19	Epithelial cells
P1_CATATTCGTCCATCCT.1	P1	14942	3030	0.0683978	0	0	Epithelial cells
P1_CATATTCGTCTTCTCG.1	P1	13064.5	2723	0.0451605	0	0	Epithelial cells
P1_CATATTCGTGATGTCT.1	P1	18029	3375	0.058295	0.00277331	22	Epithelial cells
P1_CATATTCTCAAGCCTA.1	P1	11837	2473	0.07485	0	11	Epithelial cells
P1_CATCAAGAGCCCAACC.1	P1	10867	2420	0.0660716	9.20217e-05	22	Epithelial cells
P1_CATCAAGCAAACAACA.1	P1	19958.5	3732	0.0703961	0	9	Epithelial cells
P1_CATCAAGCAACTGCTA.1	P1	14147	3017	0.0366155	7.06864e-05	1	Epithelial cells
P1_CATCAAGGTAGAAAGG.1	P1	15076	2664	0.0626824	0	0	Epithelial cells
P1_CATCAAGGTGATAAAC.1	P1	34295.5	4355	0.0535639	2.91583e-05	0	Epithelial cells
P1_CATCAAGTCAAGGCTT.1	P1	23129.5	4079	0.0629067	0	22	Epithelial cells
P1_CATCAAGTCAAGGTAA.1	P1	12421	2285	0.0545045	0.000161018	0	Epithelial cells
P1_CATCAAGTCGTCTGCT.1	P1	15207	2613	0.0491879	0	0	Epithelial cells
P1_CATCAAGTCTTGAGAC.1	P1	12749.5	2581	0.0235303	7.84344e-05	17	Endothelial cells
P1_CATCAGAAGCGCCTTG.1	P1	10546	2232	0.0610658	0	22	Epithelial cells
P1_CATCAGAAGGCTAGGT.1	P1	9016	2164	0.0662156	0	22	Epithelial cells
P1_CATCAGAAGGTGCAAC.1	P1	27970	3796	0.045513	0	0	Epithelial cells
P1_CATCAGACACTTACGA.1	P1	26215.5	4026	0.0548149	0	22	Epithelial cells
P1_CATCAGATCTGCCCTA.1	P1	12311	3151	0.0432134	8.12282e-05	8	Macrophages
P1_CATCAGATCTTAGAGC.1	P1	17778	3791	0.0372933	5.62493e-05	13	Epithelial cells
P1_CATCCACAGGCTAGAC.1	P1	7677	1946	0.0360818	0	6	Epithelial cells
P1_CATCCACAGGCTAGGT.1	P1	10408.5	2339	0.0814719	0	4	CD8+ T-cells
P1_CATCCACCAAAGCGGT.1	P1	13435.5	3074	0.0454021	0	9	Epithelial cells
P1_CATCCACTCACTTCAT.1	P1	9118	2350	0.0290634	0.000109673	13	Epithelial cells
P1_CATCCACTCTCCTATA.1	P1	14891	3015	0.0281378	0	10	Epithelial cells
P1_CATCGAAAGCCCAGCT.1	P1	7510	2113	0.0496671	0	2	Fibroblasts
P1_CATCGAACATGATCCA.1	P1	7590	1899	0.030303	0	6	Epithelial cells
P1_CATCGAACATGGATGG.1	P1	6825	1835	0.0950916	0	4	CD8+ T-cells
P1_CATCGAACATTCTTAC.1	P1	7164.5	2147	0.00767674	0	1	Epithelial cells
P1_CATCGAAGTATCGCAT.1	P1	29547.5	4360	0.0561469	0	20	Fibroblasts
P1_CATCGAAGTCATTAGC.1	P1	10795.5	2736	0.0353851	0.0282525	13	Epithelial cells
P1_CATCGAAGTGTGTGCC.1	P1	7246	2258	0.0441623	0	1	Epithelial cells
P1_CATCGAATCAACCAAC.1	P1	7778	1900	0.0249421	0	12	Epithelial cells
P1_CATCGAATCACGACTA.1	P1	35075.5	4755	0.0639193	0	9	Epithelial cells
P1_CATCGAATCGCCCTTA.1	P1	11136	2444	0.0559447	0	5	Myofibroblasts
P1_CATCGAATCTTGGGTA.1	P1	18216	3256	0.0600022	5.48968e-05	9	Epithelial cells
P1_CATCGGGAGCACCGCT.1	P1	15528	2463	0.071355	6.43998e-05	4	CD8+ T-cells
P1_CATCGGGAGCTCTCGG.1	P1	14696.5	2401	0.0779777	0	4	CD8+ T-cells
P1_CATCGGGCAATGGAGC.1	P1	26374	4456	0.0299917	0	13	Epithelial cells
P1_CATCGGGCACATCCGG.1	P1	12665	3188	0.0157126	0	12	Epithelial cells
P1_CATCGGGCAGCTTAAC.1	P1	11915	2601	0.0223248	0	6	Epithelial cells
P1_CATGACAAGTGGAGTC.1	P1	16231.5	2649	0.0362259	0	24	B-cells
P1_CATGACAAGTTTCCTT.1	P1	8132	2460	0.0290212	0	13	Epithelial cells
P1_CATGACACAACTGCGC.1	P1	7080	1791	0.0443503	0	8	Monocytes
P1_CATGACACACACGCTG.1	P1	11232	2197	0.045317	0	0	Epithelial cells
P1_CATGACAGTATAAACG.1	P1	13653	3066	0.0853292	0	2	Fibroblasts
P1_CATGACAGTCGGCATC.1	P1	14195.5	2709	0.0603712	0	33	Epithelial cells
P1_CATGACATCAGAAATG.1	P1	8168	2449	0.0215475	0	13	Epithelial cells
P1_CATGCCTAGACACTAA.1	P1	25531	4235	0.0520544	7.83361e-05	9	Epithelial cells
P1_CATGCCTAGAGACTAT.1	P1	9259	1975	0.0416892	0	12	Epithelial cells
P1_CATGCCTAGATATGCA.1	P1	7803.5	1932	0.0498494	0.00256295	4	CD8+ T-cells
P1_CATGCCTAGCGAGAAA.1	P1	13212	2274	0.0526794	7.56888e-05	0	Epithelial cells
P1_CATGCCTAGCTCCCAG.1	P1	33841	4843	0.0330664	0	6	Epithelial cells
P1_CATGCCTAGGATGGTC.1	P1	24223.5	4125	0.0272876	4.12822e-05	6	Epithelial cells
P1_CATGCCTCAAGAGTCG.1	P1	19522	3110	0.0478947	0	0	Epithelial cells
P1_CATGCCTGTGCACCAC.1	P1	18380	2967	0.0413493	0	8	Monocytes
P1_CATGCCTGTTGGAGGT.1	P1	13204	2983	0.0611936	0	22	Epithelial cells
P1_CATGCCTTCCCTCAGT.1	P1	12169.5	2290	0.048564	8.21726e-05	12	Epithelial cells
P1_CATGCCTTCCTGCAGG.1	P1	9867.5	2086	0.0510768	0	0	Epithelial cells
P1_CATGCCTTCCTTGGTC.1	P1	30762	4955	0.0604642	3.25076e-05	9	Epithelial cells
P1_CATGGCGAGGAGTTTA.1	P1	26677	4622	0.0510552	0	9	Epithelial cells
P1_CATGGCGAGGTGATAT.1	P1	6550	2461	0.0227481	0	22	Epithelial cells
P1_CATGGCGCAGCTCCGA.1	P1	14188	2596	0.0639977	0	0	Epithelial cells
P1_CATGGCGGTTTCGCTC.1	P1	21364	3563	0.0434376	0	9	Epithelial cells
P1_CATGGCGTCTGCGTAA.1	P1	10478.5	2388	0.0732929	9.54335e-05	12	Epithelial cells
P1_CATTATCAGAGCTGCA.1	P1	15306.5	2727	0.0477575	6.53317e-05	24	B-cells
P1_CATTATCCAACGCACC.1	P1	14598.5	3306	0.0274001	0	13	Epithelial cells
P1_CATTATCCACCAGATT.1	P1	14223.5	3330	0.0487925	0	22	Epithelial cells
P1_CATTATCCATAGAAAC.1	P1	9579	2402	0.0578348	0	15	Endothelial cells
P1_CATTATCGTAAGTGTA.1	P1	15771	2956	0.035635	0	5	Myofibroblasts
P1_CATTATCGTATCGCAT.1	P1	7969.5	2070	0.049313	0.000125478	0	Epithelial cells
P1_CATTATCGTTAGATGA.1	P1	20441	3473	0.0485299	9.78426e-05	22	Epithelial cells
P1_CATTATCTCTATGTGG.1	P1	39314.5	4853	0.0315405	5.08718e-05	1	Epithelial cells
P1_CATTCGCAGAGTGAGA.1	P1	11569	2899	0.025067	0	1	Epithelial cells
P1_CATTCGCAGATGCCTT.1	P1	10176	2434	0.0405857	0	6	Epithelial cells
P1_CATTCGCAGTACGACG.1	P1	11682	2436	0.0463962	0	0	Epithelial cells
P1_CATTCGCCAACTGCTA.1	P1	12622	3015	0.0437332	0	32	Macrophages
P1_CATTCGCCACCAGTTA.1	P1	20135.5	3922	0.0444489	0	22	Epithelial cells
P1_CATTCGCCACGGACAA.1	P1	11968.5	2277	0.050048	0	0	Epithelial cells
P1_CATTCGCCAGGAATCG.1	P1	8558	1840	0.0541014	0.00011685	4	CD8+ T-cells
P1_CATTCGCCAGTCTTCC.1	P1	11820	2264	0.057022	0.021912	0	Epithelial cells
P1_CATTCGCGTTACTGAC.1	P1	12529.5	2950	0.0438964	7.98116e-05	5	Myofibroblasts
P1_CCAATCCAGATCCCAT.1	P1	7890	1820	0.0401774	0	6	Epithelial cells
P1_CCAATCCCATCGATGT.1	P1	8053	1821	0.0481808	0	8	Monocytes
P1_CCAATCCCATTAACCG.1	P1	12653	2698	0.0590374	0	8	Monocytes
P1_CCAATCCGTCTGCCAG.1	P1	8969	1981	0.0599844	0	4	CD8+ T-cells
P1_CCAATCCGTGATAAGT.1	P1	30403.5	5084	0.0366076	0	6	Epithelial cells
P1_CCACCTAAGAGGTACC.1	P1	7065.5	1767	0.0655297	0	0	Epithelial cells
P1_CCACCTAAGCCCAATT.1	P1	13111.5	2649	0.0497273	7.62689e-05	0	Epithelial cells
P1_CCACCTAGTAGCGTCC.1	P1	16817	2954	0.0502468	0	12	Epithelial cells
P1_CCACCTAGTAGTACCT.1	P1	11776	2563	0.010445	0	9	Epithelial cells
P1_CCACCTAGTCTGGTCG.1	P1	11000.5	2131	0.0405436	0	0	Epithelial cells
P1_CCACCTAGTTTACTCT.1	P1	35067.5	4187	0.0452271	0	0	Epithelial cells
P1_CCACCTATCCGCAGTG.1	P1	7204	1804	0.04206	0.000138812	12	Epithelial cells
P1_CCACCTATCCTTGGTC.1	P1	7142	1898	0.0485858	0	1	Epithelial cells
P1_CCACCTATCGGACAAG.1	P1	7776	1865	0.0874486	0	4	CD8+ T-cells
P1_CCACGGAAGCTAGCCC.1	P1	9597.5	2144	0.0629331	0	0	Epithelial cells
P1_CCACGGACACAACGCC.1	P1	8907	2144	0.0487257	0	0	Epithelial cells
P1_CCACGGACAGGATCGA.1	P1	15920.5	2637	0.0867435	0.00150749	4	CD8+ T-cells
P1_CCACGGAGTTCCTCCA.1	P1	12246	2738	0.0337253	0	6	Epithelial cells
P1_CCACGGATCACAACGT.1	P1	18864	3451	0.0437871	5.3011e-05	19	Epithelial cells
P1_CCACGGATCCGAACGC.1	P1	9310.5	2247	0.0492992	0	18	Epithelial cells
P1_CCACGGATCTTACCGC.1	P1	35627	4501	0.0433379	0	1	Epithelial cells
P1_CCACTACAGACTGGGT.1	P1	7937.5	1387	0.0291024	0	24	B-cells
P1_CCACTACAGCTAGTCT.1	P1	7603	2174	0.0082862	0	1	Epithelial cells
P1_CCACTACAGGCGACAT.1	P1	17719.5	3403	0.0478004	0.00011287	10	Epithelial cells
P1_CCACTACAGGGCTCTC.1	P1	14130.5	2691	0.0365875	7.07689e-05	8	Monocytes
P1_CCACTACCAAGCGTAG.1	P1	15070	2597	0.0536165	6.6357e-05	3	CD8+ T-cells
P1_CCACTACCAGCGATCC.1	P1	11162.5	2793	0.0516013	8.95857e-05	12	Epithelial cells
P1_CCACTACGTACCGCTG.1	P1	11806.5	2321	0.0448058	0	22	Epithelial cells
P1_CCACTACGTATTACCG.1	P1	7895	1962	0.048765	0	0	Epithelial cells
P1_CCACTACTCACCCTCA.1	P1	14660.5	2904	0.0368337	0	22	Epithelial cells
P1_CCAGCGAAGGGCTTCC.1	P1	8832	2467	0.0192482	0	13	Epithelial cells
P1_CCAGCGAAGTTCCACA.1	P1	24002	3726	0.052204	0	4	CD8+ T-cells
P1_CCAGCGACAGACGCTC.1	P1	32195.5	4474	0.0487335	6.21205e-05	22	Epithelial cells
P1_CCAGCGAGTCGGCATC.1	P1	9595	2392	0.0379364	0.000104221	6	Epithelial cells
P1_CCAGCGATCAGGCGAA.1	P1	10097	2507	0.0409032	9.90393e-05	8	Monocytes
P1_CCATGTCCAAGAGTCG.1	P1	15645	3677	0.053116	0.000127836	22	Epithelial cells
P1_CCATGTCCACAAGCCC.1	P1	18445.5	3176	0.051232	5.42138e-05	22	Epithelial cells
P1_CCATGTCCACTTACGA.1	P1	6987.5	2062	0.0374955	0.000286225	13	Epithelial cells
P1_CCATGTCCAGCCTATA.1	P1	9502	2161	0.0326247	0	8	Macrophages
P1_CCATGTCGTCCGACGT.1	P1	11313	2272	0.0511801	0	22	Epithelial cells
P1_CCATGTCGTCTTCTCG.1	P1	9891	2433	0.0665251	0.000101102	13	Epithelial cells
P1_CCATGTCGTGGTCTCG.1	P1	9038.5	2039	0.0403828	0	33	Epithelial cells
P1_CCATGTCGTTACCAGT.1	P1	13146	2569	0.0621482	0	0	Epithelial cells
P1_CCATGTCGTTGGTAAA.1	P1	17492	3022	0.0447062	0	12	Epithelial cells
P1_CCATGTCTCCAATGGT.1	P1	17029.5	2888	0.0520861	0.000117443	0	Epithelial cells
P1_CCATGTCTCCCAAGAT.1	P1	18717	3399	0.0595715	0	0	Epithelial cells
P1_CCATGTCTCTAACTGG.1	P1	10548	2240	0.0582101	0	0	Epithelial cells
P1_CCATTCGAGACACGAC.1	P1	14174	2880	0.0407083	0	0	Epithelial cells
P1_CCATTCGAGACGCAAC.1	P1	19174.5	3110	0.0414613	0	9	Epithelial cells
P1_CCATTCGAGATGGCGT.1	P1	31483	4029	0.0599689	0	6	Epithelial cells
P1_CCATTCGAGTATCGAA.1	P1	14026.5	2633	0.0430613	0	9	Epithelial cells
P1_CCATTCGAGTCACGCC.1	P1	26791.5	4316	0.02777	0	13	Epithelial cells
P1_CCATTCGCACGAAAGC.1	P1	6845.5	1833	0.0501059	0	6	Epithelial cells
P1_CCATTCGCAGTCACTA.1	P1	26751	4706	0.0297559	0	5	Myofibroblasts
P1_CCATTCGCATGATCCA.1	P1	10120	2531	0.0335968	0	12	Epithelial cells
P1_CCATTCGCATGCCACG.1	P1	6484	1763	0.0305367	0	6	Epithelial cells
P1_CCATTCGGTGCCTGTG.1	P1	11339	2259	0.0238116	8.81912e-05	12	Epithelial cells
P1_CCATTCGGTTCAGCGC.1	P1	18135.5	3590	0.0873976	0	6	Epithelial cells
P1_CCATTCGTCCAAAGTC.1	P1	32727.5	4584	0.0476663	0	8	Monocytes
P1_CCATTCGTCGAACGGA.1	P1	9638	2174	0.052293	0.000207512	22	Epithelial cells
P1_CCCAATCAGAATCTCC.1	P1	9114	2228	0.0545315	0.000109721	12	Epithelial cells
P1_CCCAATCAGACTCGGA.1	P1	8802	2408	0.027721	0	13	Epithelial cells
P1_CCCAATCAGGTGTGGT.1	P1	19651	3026	0.044985	0	0	Epithelial cells
P1_CCCAATCCAACTTGAC.1	P1	16966	2634	0.0507486	0	12	Epithelial cells
P1_CCCAATCGTTCGGCAC.1	P1	7248	1760	0.0315949	0	12	Epithelial cells
P1_CCCAATCTCAACACGT.1	P1	6525	2049	0.0412261	0.000153257	5	Myofibroblasts
P1_CCCAATCTCCACGACG.1	P1	7753	2055	0.0368889	0	20	Fibroblasts
P1_CCCAGTTAGAATGTTG.1	P1	17941	2506	0.0434201	5.57383e-05	0	Epithelial cells
P1_CCCAGTTCAGGGTATG.1	P1	8572.5	2075	0.0313794	0.000116652	1	Epithelial cells
P1_CCCAGTTCATCCCATC.1	P1	14477	2923	0.0447607	0	12	Epithelial cells
P1_CCCAGTTCATGTAGTC.1	P1	6573	1620	0.0721132	0	6	Epithelial cells
P1_CCCAGTTCATTGAGCT.1	P1	22760.5	3419	0.0566771	0	12	Epithelial cells
P1_CCCAGTTGTCAGAAGC.1	P1	12185	2437	0.0461223	0	19	Epithelial cells
P1_CCCAGTTTCAGCAACT.1	P1	11810.5	2594	0.0524957	0	0	Epithelial cells
P1_CCCATACAGACTTTCG.1	P1	11647	2721	0.0546922	0	22	Epithelial cells
P1_CCCATACAGAGACGAA.1	P1	14037	2563	0.0326993	0	6	Epithelial cells
P1_CCCATACAGCCAACAG.1	P1	30397.5	4258	0.052274	0	9	Epithelial cells
P1_CCCATACAGCCCAGCT.1	P1	10052.5	2491	0.0600846	9.94777e-05	11	Epithelial cells
P1_CCCATACAGTGAACGC.1	P1	22039	3414	0.0681973	0	0	Epithelial cells
P1_CCCATACAGTTGTAGA.1	P1	7561	2067	0.039016	0	2	Fibroblasts
P1_CCCATACCAAGAAGAG.1	P1	21556.5	3758	0.0915269	0	6	Epithelial cells
P1_CCCATACCAAGCGATG.1	P1	7781	1727	0.0663154	0.000128518	4	CD8+ T-cells
P1_CCCATACCACCGGAAA.1	P1	23248	4079	0.0311425	0	13	Epithelial cells
P1_CCCATACCAGTGGGAT.1	P1	10649.5	2386	0.0441335	0	12	Epithelial cells
P1_CCCATACCATACAGCT.1	P1	8558.5	2269	0.0373897	0.000116843	10	Epithelial cells
P1_CCCTCCTAGATCGATA.1	P1	31076.5	4409	0.0683475	0	22	Epithelial cells
P1_CCCTCCTAGTATTGGA.1	P1	35732	4400	0.0608138	8.39584e-05	0	Epithelial cells
P1_CCCTCCTCAATGGACG.1	P1	7898.5	2084	0.0316516	0	6	Epithelial cells
P1_CCCTCCTCAGACAAGC.1	P1	7041.5	2073	0.0501314	0.000142015	10	Epithelial cells
P1_CCCTCCTCAGTATGCT.1	P1	27023	3882	0.0488473	7.4011e-05	9	Epithelial cells
P1_CCCTCCTCATAGACTC.1	P1	21284	3892	0.0772411	4.69836e-05	22	Epithelial cells
P1_CCCTCCTGTCTAGCCG.1	P1	12051.5	2543	0.0418205	8.29772e-05	0	Epithelial cells
P1_CCCTCCTGTCTCAACA.1	P1	11178	2560	0.0381106	0	22	Epithelial cells
P1_CCCTCCTTCGCTAGCG.1	P1	20284	3289	0.0612798	0.0001479	0	Epithelial cells
P1_CCCTCCTTCTCGAGTA.1	P1	14919	2366	0.0534888	0	0	Epithelial cells
P1_CCCTCCTTCTGGAGCC.1	P1	12145.5	2897	0.0672677	0	6	Epithelial cells
P1_CCGGGATAGCGTGAAC.1	P1	31584	4415	0.0575608	0	0	Epithelial cells
P1_CCGGGATCAAGCGCTC.1	P1	15889	2903	0.0473283	0	12	Epithelial cells
P1_CCGGGATCAAGTCTAC.1	P1	24661.5	4285	0.0461448	0	6	Epithelial cells
P1_CCGGGATGTATGAATG.1	P1	28724	3319	0.0250661	6.96282e-05	12	Epithelial cells
P1_CCGGGATTCCGCGGTA.1	P1	14674.5	2409	0.0638523	6.81454e-05	0	Epithelial cells
P1_CCGGTAGAGACTTTCG.1	P1	24361.5	3857	0.0581245	0	9	Epithelial cells
P1_CCGGTAGAGCTCCTTC.1	P1	10679	2638	0.0495365	9.36417e-05	22	Epithelial cells
P1_CCGGTAGAGGCCCGTT.1	P1	31072.5	4405	0.0472122	0	6	Epithelial cells
P1_CCGGTAGAGGTCGGAT.1	P1	16342	3115	0.0597234	0	5	Myofibroblasts
P1_CCGGTAGCACTATCTT.1	P1	13388	3008	0.043173	0	12	Epithelial cells
P1_CCGGTAGCATGGATGG.1	P1	15901.5	3140	0.049052	0	0	Epithelial cells
P1_CCGGTAGGTCCAGTAT.1	P1	15316	2790	0.0518412	0	11	Epithelial cells
P1_CCGGTAGTCGGAGCAA.1	P1	13051.5	2403	0.0426771	0	1	Epithelial cells
P1_CCGGTAGTCGTTTGCC.1	P1	13526	3276	0.0403667	0	20	Epithelial cells
P1_CCGTACTAGAATCTCC.1	P1	26054	3577	0.0508943	0	0	Epithelial cells
P1_CCGTACTAGGACAGAA.1	P1	10593.5	2136	0.0408741	0	22	Epithelial cells
P1_CCGTACTAGTCATCCA.1	P1	11958.5	2778	0.0650583	0	9	Epithelial cells
P1_CCGTACTCACACCGAC.1	P1	14862	2558	0.0327681	0	0	Epithelial cells
P1_CCGTACTCACATCCAA.1	P1	12506	2539	0.0595714	0	22	Epithelial cells
P1_CCGTACTCAGCTCCGA.1	P1	26304	3656	0.040108	7.60341e-05	6	Epithelial cells
P1_CCGTACTCATTTGCTT.1	P1	11830	2680	0.0573964	8.45309e-05	32	Macrophages
P1_CCGTACTTCAAGCCTA.1	P1	9476	2067	0.0633179	0	4	CD8+ T-cells
P1_CCGTGGACAAAGGTGC.1	P1	24528	4257	0.0432159	0	22	Epithelial cells
P1_CCGTGGACAATAGCAA.1	P1	7410	1976	0.0310391	0.000134953	6	Epithelial cells
P1_CCGTGGAGTAACGACG.1	P1	15118.5	2707	0.0452426	0	13	Epithelial cells
P1_CCGTGGATCGTTTAGG.1	P1	10415.5	2436	0.0702799	0	12	Epithelial cells
P1_CCGTTCAAGAAACCTA.1	P1	6966.5	1771	0.0521065	0	2	Fibroblasts
P1_CCGTTCAAGCGTTTAC.1	P1	33142.5	4635	0.0486385	3.01727e-05	9	Epithelial cells
P1_CCGTTCAAGCTAGTCT.1	P1	8693	1890	0.0682158	0	4	CD8+ T-cells
P1_CCGTTCACATTAGCCA.1	P1	15423	2447	0.0466187	6.48382e-05	0	Epithelial cells
P1_CCGTTCAGTAGAGCTG.1	P1	9596	2150	0.0570029	0	22	Epithelial cells
P1_CCGTTCAGTATGAAAC.1	P1	14613	2958	0.0566619	6.84322e-05	22	Epithelial cells
P1_CCGTTCAGTCCGACGT.1	P1	6508	1610	0.037185	0	8	Monocytes
P1_CCGTTCAGTCCTCTTG.1	P1	25483.5	4085	0.0375145	0	12	Epithelial cells
P1_CCGTTCAGTGGTACAG.1	P1	14698.5	2624	0.0246284	0	15	Endothelial cells
P1_CCTAAAGAGTGGAGTC.1	P1	14890	2761	0.04137	0	12	Epithelial cells
P1_CCTAAAGCACAAGACG.1	P1	13410	3078	0.0507084	0	20	Fibroblasts
P1_CCTAAAGCAGTTCATG.1	P1	14714	2933	0.0576322	6.79625e-05	12	Epithelial cells
P1_CCTAAAGGTAGCGCAA.1	P1	13509	2649	0.0537419	7.40247e-05	0	Epithelial cells
P1_CCTAAAGGTTGCGTTA.1	P1	6576	1980	0.0328467	0	6	Epithelial cells
P1_CCTACACAGGTGATTA.1	P1	19913	3710	0.08045	0	9	Epithelial cells
P1_CCTACACCAAGGACAC.1	P1	6560	2003	0.0407012	0	32	Macrophages
P1_CCTACACCACATGTGT.1	P1	21667.5	3437	0.061013	4.61521e-05	24	B-cells
P1_CCTACACGTAAAGGAG.1	P1	12380.5	2420	0.0430516	0	19	Epithelial cells
P1_CCTACACTCCAAACTG.1	P1	7023	1917	0.0461341	0.000284779	1	Epithelial cells
P1_CCTACACTCGCCATAA.1	P1	24952	4596	0.0318612	0	13	Epithelial cells
P1_CCTACCAAGAATGTTG.1	P1	14355	2519	0.076489	0	4	CD8+ T-cells
P1_CCTACCAAGCTAAACA.1	P1	6881.5	1846	0.0773087	0	3	CD8+ T-cells
P1_CCTACCAAGTTCGCGC.1	P1	11614	2868	0.0532116	8.6103e-05	22	Epithelial cells
P1_CCTACCACAAGACGTG.1	P1	24228	3736	0.0352485	0	9	Epithelial cells
P1_CCTACCACACATCCAA.1	P1	15502.5	3295	0.0393485	0	13	Epithelial cells
P1_CCTACCACACGAGAGT.1	P1	7612	2212	0.0224645	0.000131372	17	Endothelial cells
P1_CCTACCACATCCTAGA.1	P1	7237	1857	0.0526461	0	0	Epithelial cells
P1_CCTACCAGTCCATCCT.1	P1	10270	2523	0.0518014	0	22	Epithelial cells
P1_CCTACCAGTGCAGTAG.1	P1	10093.5	2161	0.0641997	0	4	CD8+ T-cells
P1_CCTACCAGTTCGTTGA.1	P1	8569	1811	0.0452795	0	0	Epithelial cells
P1_CCTACCAGTTTCCACC.1	P1	7781	2008	0.0475517	0	6	Epithelial cells
P1_CCTACCATCCAAGCCG.1	P1	14411	3382	0.0259524	6.93914e-05	20	Epithelial cells
P1_CCTAGCTAGGCCCTTG.1	P1	17097	3384	0.0231035	0	13	Epithelial cells
P1_CCTAGCTGTCAGAAGC.1	P1	9927.5	1132	0.00916646	0.00010073	23	B-cells
P1_CCTAGCTGTGTGCGTC.1	P1	11874	2741	0.0455617	8.42176e-05	1	Epithelial cells
P1_CCTAGCTGTTTACTCT.1	P1	11533	2193	0.0559265	0	12	Epithelial cells
P1_CCTAGCTTCACCTTAT.1	P1	13528	2675	0.0381431	0	3	CD8+ T-cells
P1_CCTAGCTTCATTGCCC.1	P1	7419	1708	0.026823	0	2	Fibroblasts
P1_CCTAGCTTCCGTACAA.1	P1	10608	2322	0.0689103	0	6	Epithelial cells
P1_CCTATTAAGCGTGAAC.1	P1	18189.5	3646	0.030732	0	13	Epithelial cells
P1_CCTATTATCAGCTTAG.1	P1	22637.5	3558	0.0527002	0	24	B-cells
P1_CCTATTATCTAACGGT.1	P1	15228.5	3427	0.0501034	0	6	Epithelial cells
P1_CCTATTATCTTGGGTA.1	P1	9188	2066	0.0557249	0	22	Epithelial cells
P1_CCTCAGTAGACCTTTG.1	P1	9206	1959	0.0404084	0	0	Epithelial cells
P1_CCTCAGTAGACGCACA.1	P1	13040.5	2705	0.0486945	0	3	CD8+ T-cells
P1_CCTCAGTAGACTAAGT.1	P1	21475	3399	0.0475902	0	8	Monocytes
P1_CCTCAGTAGTTGTAGA.1	P1	21523	3275	0.0393997	0	8	Monocytes
P1_CCTCAGTCATTAACCG.1	P1	15392	3307	0.0597063	0.000129938	12	Epithelial cells
P1_CCTCAGTGTCGGATCC.1	P1	12264	2271	0.0458252	0	1	Epithelial cells
P1_CCTCAGTGTCTCCACT.1	P1	10641	2058	0.086552	0	4	CD8+ T-cells
P1_CCTCAGTGTCTCTCGT.1	P1	14809.5	3513	0.0538843	0	9	Epithelial cells
P1_CCTCAGTGTTCGGGCT.1	P1	6915.5	1751	0.0571181	0	5	Myofibroblasts
P1_CCTCAGTTCACCATAG.1	P1	9780.5	2620	0.0713665	0	12	Epithelial cells
P1_CCTCTGAAGATCTGCT.1	P1	19500	2976	0.0534872	0	0	Epithelial cells
P1_CCTCTGACACTTGGAT.1	P1	13993	2444	0.0501679	0	0	Epithelial cells
P1_CCTCTGAGTGAACCTT.1	P1	7334.5	2179	0.0317677	0	17	Endothelial cells
P1_CCTCTGATCTCCAACC.1	P1	7287	1963	0.0905723	0	3	CD8+ T-cells
P1_CCTTACGAGAAACCGC.1	P1	21471.5	3051	0.059381	4.65734e-05	0	Epithelial cells
P1_CCTTACGCACGACGAA.1	P1	25594.5	4204	0.0765399	0	0	Epithelial cells
P1_CCTTACGCACTGTCGG.1	P1	16238	2526	0.0516073	0	24	B-cells
P1_CCTTACGCAGTATCTG.1	P1	9840	2323	0.0615854	0.000203252	2	Fibroblasts
P1_CCTTACGGTATATGGA.1	P1	7903.5	2111	0.0700955	0	12	Epithelial cells
P1_CCTTACGTCCAAAGTC.1	P1	23660	3631	0.0456467	0	1	Epithelial cells
P1_CCTTCCCAGTCGTACT.1	P1	9996	2113	0.0567227	0	0	Epithelial cells
P1_CCTTCCCCAACTGGCC.1	P1	7772.5	2265	0.0467031	0	6	Epithelial cells
P1_CCTTCCCCAAGTTAAG.1	P1	24461.5	4224	0.0425567	0	9	Epithelial cells
P1_CCTTCCCCACCTCGGA.1	P1	16219.5	3251	0.054564	0	8	Monocytes
P1_CCTTCCCCACGGTAAG.1	P1	27799	4617	0.0348933	0	13	Epithelial cells
P1_CCTTCCCCATGACGGA.1	P1	11158	3099	0.0510844	0	20	Fibroblasts
P1_CCTTCCCGTACAGACG.1	P1	25649	3103	0.0374284	3.89879e-05	1	Epithelial cells
P1_CCTTCCCTCCTTGCCA.1	P1	7852	1624	0.0398625	0	12	Epithelial cells
P1_CCTTCCCTCGCTTGTC.1	P1	7469	1629	0.054358	0	6	Epithelial cells
P1_CCTTCGAAGCTAAGAT.1	P1	7443	1964	0.029558	0	32	Macrophages
P1_CCTTCGAAGGCAGTCA.1	P1	9039	2213	0.0635026	0	4	CD8+ T-cells
P1_CCTTCGAAGGGTTCCC.1	P1	9674	1675	0.0220178	0	10	Epithelial cells
P1_CCTTCGAAGTCGATAA.1	P1	23411.5	4289	0.0330607	4.27141e-05	6	Epithelial cells
P1_CCTTCGAGTATCGCAT.1	P1	10784	2356	0.0365356	0	6	Epithelial cells
P1_CCTTCGAGTGATGATA.1	P1	10916.5	2380	0.0823524	0	4	CD8+ T-cells
P1_CCTTCGAGTGGCTCCA.1	P1	8172	1894	0.0430739	0	1	Epithelial cells
P1_CCTTCGAGTGTTAAGA.1	P1	7140.5	1636	0.0547581	0	0	Epithelial cells
P1_CCTTTCTAGTCGTACT.1	P1	27560	4355	0.0373367	0	22	Epithelial cells
P1_CCTTTCTCAAGTCTAC.1	P1	17422	3157	0.0578579	0.000114797	0	Epithelial cells
P1_CCTTTCTCACAAGCCC.1	P1	17310	3206	0.060543	0	12	Epithelial cells
P1_CCTTTCTCACAGAGGT.1	P1	19396	2966	0.00783667	5.1557e-05	1	Epithelial cells
P1_CCTTTCTCAGAAGCAC.1	P1	26650	3918	0.0431144	0	1	Epithelial cells
P1_CCTTTCTGTGAAAGAG.1	P1	11246	2100	0.0516628	0	22	Epithelial cells
P1_CGAACATAGTCCAGGA.1	P1	12406	2766	0.0514267	8.06062e-05	20	Fibroblasts
P1_CGAACATCAAGTACCT.1	P1	14812	2806	0.0609641	6.75128e-05	6	Epithelial cells
P1_CGAACATGTTTGTGTG.1	P1	7665.5	1924	0.0328746	0.000260909	6	Epithelial cells
P1_CGAACATTCTTAGAGC.1	P1	11617	2442	0.0534561	8.60807e-05	3	CD8+ T-cells
P1_CGAACATTCTTGTATC.1	P1	19114	2895	0.0458303	5.23177e-05	0	Epithelial cells
P1_CGAATGTAGAGATGAG.1	P1	11896	2001	0.0351379	0.000504371	12	Epithelial cells
P1_CGAATGTCAATAGCGG.1	P1	9813	2118	0.0530928	0.000305717	0	Epithelial cells
P1_CGAATGTCATACTACG.1	P1	26202.5	4428	0.0258372	7.63286e-05	13	Epithelial cells
P1_CGAATGTTCTAACTGG.1	P1	31508.5	3393	0.030468	0	1	Epithelial cells
P1_CGAATGTTCTTTAGGG.1	P1	9185	2501	0.0271094	0.000108873	9	Epithelial cells
P1_CGACCTTGTCACAAGG.1	P1	12718	2287	0.0462337	0	0	Epithelial cells
P1_CGACCTTGTGGACGAT.1	P1	17240	3853	0.0585847	0	2	Fibroblasts
P1_CGACCTTGTTCCACGG.1	P1	20246	3806	0.0370937	0	6	Epithelial cells
P1_CGACTTCAGCACCGCT.1	P1	6549.5	2093	0.0313001	0.000152683	13	Epithelial cells
P1_CGACTTCAGCCTCGTG.1	P1	8285	2275	0.055522	0	13	Epithelial cells
P1_CGACTTCAGCTGAAAT.1	P1	8247	2005	0.029344	0	6	Epithelial cells
P1_CGACTTCCAAGTCTGT.1	P1	18842	3074	0.0743021	0.000159219	3	CD8+ T-cells
P1_CGACTTCCACAACGCC.1	P1	18293	3768	0.0321981	0	13	Epithelial cells
P1_CGACTTCGTATATGGA.1	P1	8897	2470	0.0315837	0.000112397	17	Endothelial cells
P1_CGACTTCGTCATATCG.1	P1	7571	1982	0.0529653	0	22	Epithelial cells
P1_CGACTTCTCCTATTCA.1	P1	25402.5	4150	0.0692845	0	9	Epithelial cells
P1_CGACTTCTCTCTAAGG.1	P1	6934	1971	0.0514854	0.000144217	21	Macrophages
P1_CGAGAAGAGACTACAA.1	P1	8577	2299	0.0940888	0	4	CD8+ T-cells
P1_CGAGAAGAGTCTCGGC.1	P1	17043.5	2997	0.0630739	5.86734e-05	0	Epithelial cells
P1_CGAGAAGCACGGTAGA.1	P1	11253	2341	0.0671821	8.88652e-05	3	CD8+ T-cells
P1_CGAGAAGGTGTCGCTG.1	P1	10038.5	2156	0.0829805	9.96165e-05	4	CD8+ T-cells
P1_CGAGAAGTCAGAGCTT.1	P1	12445.5	2481	0.0703065	0	22	Epithelial cells
P1_CGAGAAGTCAGCTCTC.1	P1	20226	3185	0.0575497	0	0	Epithelial cells
P1_CGAGAAGTCCTGTAGA.1	P1	7823	2204	0.0366867	0	12	Epithelial cells
P1_CGAGAAGTCGCCAAAT.1	P1	9417	1931	0.0964214	0	3	CD8+ T-cells
P1_CGAGAAGTCGTAGGTT.1	P1	16348.5	3532	0.0348656	6.11677e-05	6	Endothelial cells
P1_CGAGAAGTCTGCCAGG.1	P1	27259.5	3960	0.0632073	3.66845e-05	11	Epithelial cells
P1_CGAGAAGTCTTGAGGT.1	P1	9905	2091	0.0604745	0	0	Epithelial cells
P1_CGAGCACCAAGTAGTA.1	P1	10524.5	2222	0.0726875	0	11	Epithelial cells
P1_CGAGCACCATATGGTC.1	P1	11186	2226	0.0489004	8.93975e-05	0	Epithelial cells
P1_CGAGCACGTTAAGACA.1	P1	8723	604	0.0032099	0	24	B-cells
P1_CGAGCACTCCCTGACT.1	P1	9964	2200	0.0631273	0	12	Epithelial cells
P1_CGAGCCAAGGTCATCT.1	P1	12409.5	2248	0.0440791	0	0	Epithelial cells
P1_CGAGCCACAAACCCAT.1	P1	13623	3024	0.0405197	0.00161492	6	Epithelial cells
P1_CGAGCCACAAGAAGAG.1	P1	20759	3310	0.0437401	0	9	Epithelial cells
P1_CGAGCCACACGGCCAT.1	P1	14237.5	2399	0.0498683	7.02371e-05	0	Epithelial cells
P1_CGAGCCAGTCATTAGC.1	P1	8505.5	1563	0.0493798	0	4	CD8+ T-cells
P1_CGAGCCAGTCCTAGCG.1	P1	16140	3046	0.0434325	0	6	Epithelial cells
P1_CGAGCCATCAACACAC.1	P1	26426	4764	0.0387497	0	12	Epithelial cells
P1_CGAGCCATCAGCTCGG.1	P1	12671	2352	0.0468787	0	0	Epithelial cells
P1_CGATCGGAGACAATAC.1	P1	9387.5	2090	0.0468708	0	12	Epithelial cells
P1_CGATCGGCAGCATACT.1	P1	6562	1980	0.0259067	0.000152393	6	Epithelial cells
P1_CGATCGGCAGGTGGAT.1	P1	19122.5	3566	0.0312721	0	22	Epithelial cells
P1_CGATCGGCATCGTCGG.1	P1	8311	2303	0.073517	0	8	Monocytes
P1_CGATCGGCATGGGAAC.1	P1	9820	1833	0.0691446	0.000101833	4	CD8+ T-cells
P1_CGATCGGGTACCGTTA.1	P1	6661	1496	0.0387329	0	12	Epithelial cells
P1_CGATCGGTCACCCTCA.1	P1	24153	4278	0.0279882	0	13	Epithelial cells
P1_CGATCGGTCCCTGACT.1	P1	10415.5	2406	0.0251548	0	17	Endothelial cells
P1_CGATCGGTCCTTGCCA.1	P1	7556.5	2186	0.0410243	0	32	Macrophages
P1_CGATGGCAGGAGCGTT.1	P1	23559	3652	0.0626937	0	9	Epithelial cells
P1_CGATGGCGTAGTACCT.1	P1	12187	2516	0.0580126	8.20546e-05	4	CD8+ T-cells
P1_CGATGGCGTCATTAGC.1	P1	7534.5	1946	0.0323844	0	2	Fibroblasts
P1_CGATGGCGTCTAGGTT.1	P1	11581	2321	0.0379933	0	6	Epithelial cells
P1_CGATGGCGTGGCGAAT.1	P1	8494	2110	0.0603956	0.00011773	6	Epithelial cells
P1_CGATGGCGTTGCCTCT.1	P1	7968.5	2248	0.0340089	0	8	Macrophages
P1_CGATGGCGTTGGAGGT.1	P1	11221	2203	0.0649675	0	0	Epithelial cells
P1_CGATGTAAGACACTAA.1	P1	8292	2243	0.0758562	0	10	Epithelial cells
P1_CGATGTAAGCCACTAT.1	P1	19562	2932	0.0396176	0	0	Epithelial cells
P1_CGATGTAAGCGATGAC.1	P1	8642	1864	0.0266142	0	6	Epithelial cells
P1_CGATGTACATGGATGG.1	P1	35599.5	4914	0.0698044	2.80903e-05	0	Epithelial cells
P1_CGATGTACATTACGAC.1	P1	13068	2452	0.0458372	0	0	Epithelial cells
P1_CGATGTACATTGGCGC.1	P1	7774	2025	0.039362	0.000257268	13	Epithelial cells
P1_CGATGTAGTTTACTCT.1	P1	8799.5	2161	0.0613671	0	12	Epithelial cells
P1_CGATGTATCACGAAGG.1	P1	18644.5	3333	0.0418354	0	19	Epithelial cells
P1_CGATGTATCGACAGCC.1	P1	25628	3561	0.0621196	0.000117059	22	Epithelial cells
P1_CGATGTATCTCTAAGG.1	P1	14549.5	2777	0.0384206	6.87309e-05	12	Epithelial cells
P1_CGATTGAAGCTGGAAC.1	P1	18262.5	3402	0.0518549	0	22	Epithelial cells
P1_CGATTGAAGGCAAAGA.1	P1	7257	1685	0.0281108	0	7	Mast
P1_CGATTGACAACTTGAC.1	P1	17180.5	3293	0.0797998	5.82055e-05	22	Epithelial cells
P1_CGATTGACAGCTGTGC.1	P1	15983.5	2815	0.0757656	0	4	CD8+ T-cells
P1_CGATTGAGTCAATACC.1	P1	10382	2080	0.0398767	0.000192641	12	Epithelial cells
P1_CGATTGAGTCAATGTC.1	P1	7504	2007	0.0549041	0	0	Epithelial cells
P1_CGATTGATCATATCGG.1	P1	7453	1873	0.042399	0	0	Epithelial cells
P1_CGATTGATCTACCAGA.1	P1	7241.5	2183	0.0240282	0	6	Epithelial cells
P1_CGATTGATCTTCATGT.1	P1	14816	3376	0.0194384	0	31	Endothelial cells
P1_CGCCAAGAGAAGAAGC.1	P1	15165	2745	0.0307946	0	10	Epithelial cells
P1_CGCCAAGAGCGATGAC.1	P1	16028	2906	0.0626404	0	22	Epithelial cells
P1_CGCCAAGAGGACTGGT.1	P1	10857.5	2461	0.0419065	0	6	Epithelial cells
P1_CGCCAAGCATATGGTC.1	P1	19651	3431	0.0429495	0	12	Epithelial cells
P1_CGCCAAGCATCTGGTA.1	P1	12971	2554	0.0494179	7.70951e-05	0	Epithelial cells
P1_CGCCAAGCATGACATC.1	P1	7251.5	1930	0.0453699	0	21	Macrophages
P1_CGCCAAGGTAGGACAC.1	P1	11012.5	2148	0.0559364	0	0	Epithelial cells
P1_CGCCAAGGTGGTACAG.1	P1	6976.5	1867	0.0366946	0	20	Epithelial cells
P1_CGCCAAGGTTGTCTTT.1	P1	12202	2502	0.0560564	0	0	Epithelial cells
P1_CGCCAAGTCCGAAGAG.1	P1	11290	1772	0.0341895	0	12	Epithelial cells
P1_CGCGGTAAGAGAACAG.1	P1	18161	3247	0.0809427	0	4	CD8+ T-cells
P1_CGCGGTAAGGCAGGTT.1	P1	9249.5	1958	0.0516785	0.000108114	0	Epithelial cells
P1_CGCGGTAAGGTGTGGT.1	P1	15128	2795	0.0485854	0	0	Epithelial cells
P1_CGCGGTACAAGGTTTC.1	P1	9416	1982	0.0832625	0.000212404	4	CD8+ T-cells
P1_CGCGGTACACTAGTAC.1	P1	10293.5	2462	0.0648953	0	6	Epithelial cells
P1_CGCGGTACAGTAACGG.1	P1	7089	1845	0.0736352	0	4	CD8+ T-cells
P1_CGCGGTACATGCCCGA.1	P1	18744	3288	0.0493491	5.33504e-05	20	Fibroblasts
P1_CGCGGTACATGGGACA.1	P1	11955.5	2889	0.0562084	0	22	Epithelial cells
P1_CGCGGTAGTAGCACGA.1	P1	11054	2333	0.0763525	0	4	CD8+ T-cells
P1_CGCGGTAGTGAGTATA.1	P1	6575	1918	0.0509506	0	1	Epithelial cells
P1_CGCGGTAGTGGCCCTA.1	P1	19104	3604	0.049309	0	22	Epithelial cells
P1_CGCGGTATCACATAGC.1	P1	12555	2616	0.0442851	0	19	Epithelial cells
P1_CGCGGTATCTCCAGGG.1	P1	9359.5	1944	0.0581228	0	22	Epithelial cells
P1_CGCGTTTAGTGCCAGA.1	P1	21855.5	3388	0.0409965	0	1	Epithelial cells
P1_CGCGTTTCAAGAAAGG.1	P1	9715	2316	0.0212043	0	2	Fibroblasts
P1_CGCGTTTCAGATGGCA.1	P1	9949	2529	0.0257312	0	21	Macrophages
P1_CGCGTTTCAGATTGCT.1	P1	15854.5	2853	0.0956826	6.30736e-05	8	Monocytes
P1_CGCGTTTCAGCTTAAC.1	P1	15268	2626	0.0434897	0	22	Epithelial cells
P1_CGCGTTTCAGGTGCCT.1	P1	7119	1888	0.0304818	0	6	Epithelial cells
P1_CGCGTTTGTATGGTTC.1	P1	8623	2279	0.0477792	0	13	Epithelial cells
P1_CGCGTTTGTGATAAAC.1	P1	8002.5	1774	0.0684786	0	3	CD8+ T-cells
P1_CGCGTTTGTGATGTCT.1	P1	18242	3136	0.0379893	0	20	Fibroblasts
P1_CGCGTTTTCTACGAGT.1	P1	10916	1848	0.0322462	0	1	Epithelial cells
P1_CGCGTTTTCTTGTCAT.1	P1	8153	2492	0.0869619	0	20	Fibroblasts
P1_CGCTATCAGCAGACTG.1	P1	17647	2624	0.0595569	0	4	CD8+ T-cells
P1_CGCTATCAGCTGCCCA.1	P1	19683	3490	0.056343	0	0	Epithelial cells
P1_CGCTATCCAAGCTGAG.1	P1	12638.5	2483	0.0587886	0	22	Epithelial cells
P1_CGCTATCCAGCCTTTC.1	P1	18192	3053	0.0559587	0	0	Epithelial cells
P1_CGCTATCCATGGATGG.1	P1	10276	2130	0.0475866	0	12	Epithelial cells
P1_CGCTATCGTAATCGTC.1	P1	21838.5	3398	0.020789	0	6	Epithelial cells
P1_CGCTATCGTACCGGCT.1	P1	10405.5	2633	0.0422853	0	13	Epithelial cells
P1_CGCTATCGTCGAACAG.1	P1	8690	1949	0.058458	0	4	CD8+ T-cells
P1_CGCTATCTCGTCTGAA.1	P1	26806.5	4315	0.0612165	0.000111913	5	Myofibroblasts
P1_CGCTATCTCTAACCGA.1	P1	6995	2041	0.0406004	0	12	Epithelial cells
P1_CGCTATCTCTGCTGCT.1	P1	10280.5	2308	0.0720782	9.72715e-05	4	CD8+ T-cells
P1_CGCTGGAAGCTAGCCC.1	P1	8528	1940	0.0372889	0.000117261	13	Epithelial cells
P1_CGCTGGAAGTCAAGGC.1	P1	13732.5	2245	0.0476971	0.00014564	0	Epithelial cells
P1_CGCTGGACAACAACCT.1	P1	7787	2052	0.0565044	0.000128419	3	CD8+ T-cells
P1_CGCTGGATCAAGGTAA.1	P1	12288	2596	0.0593262	8.13802e-05	3	CD8+ T-cells
P1_CGCTGGATCCGATATG.1	P1	14358	1980	0.0188048	6.96476e-05	12	Epithelial cells
P1_CGCTGGATCTGCTGCT.1	P1	20707.5	3686	0.0505614	0	0	Epithelial cells
P1_CGCTTCAAGAAGATTC.1	P1	7648	2036	0.0485094	0	12	Epithelial cells
P1_CGCTTCAAGCTGTTCA.1	P1	28536.5	3872	0.0692797	7.00857e-05	9	Epithelial cells
P1_CGCTTCAGTCCGACGT.1	P1	6467	947	0.0225762	0.000154631	24	B-cells
P1_CGCTTCAGTGCACTTA.1	P1	21818.5	3528	0.0450077	4.58327e-05	6	Epithelial cells
P1_CGCTTCAGTTACCGAT.1	P1	22995	3909	0.0377473	0	6	Epithelial cells
P1_CGCTTCATCAGAGACG.1	P1	9139.5	2129	0.0471579	0	0	Epithelial cells
P1_CGCTTCATCAGGCCCA.1	P1	7780	2071	0.0231362	0	12	Epithelial cells
P1_CGGACACAGACTAGGC.1	P1	21916	3041	0.0616445	4.56288e-05	4	CD8+ T-cells
P1_CGGACACAGTCTCGGC.1	P1	22134.5	4428	0.0456301	4.51783e-05	32	Macrophages
P1_CGGACACCACCTTGTC.1	P1	14945.5	2477	0.0416179	6.69098e-05	12	Epithelial cells
P1_CGGACACGTGCGAAAC.1	P1	36498	5393	0.049674	0	12	Epithelial cells
P1_CGGACACTCAAACAAG.1	P1	12249	2676	0.0510246	0	15	Endothelial cells
P1_CGGACACTCCGTAGGC.1	P1	15761	2908	0.0501872	0	3	CD8+ T-cells
P1_CGGACACTCCTCAATT.1	P1	9486	1373	0.0146532	0.000105419	24	B-cells
P1_CGGACACTCGAGCCCA.1	P1	8802.5	1901	0.0531667	0	0	Epithelial cells
P1_CGGACACTCTCCAACC.1	P1	13497	2992	0.036823	0	5	Myofibroblasts
P1_CGGACGTCACCGAATT.1	P1	12897	1937	0.0461348	7.75374e-05	0	Epithelial cells
P1_CGGACGTGTCTGGTCG.1	P1	12158	3428	0.0299391	0	13	Epithelial cells
P1_CGGACGTTCACTCCTG.1	P1	15155	2648	0.0586605	0	0	Epithelial cells
P1_CGGACGTTCCACTCCA.1	P1	6471	1850	0.0380158	0	6	Epithelial cells
P1_CGGACGTTCGTAGGTT.1	P1	12697.5	2521	0.0535538	0	0	Epithelial cells
P1_CGGACGTTCTGGTATG.1	P1	17194.5	3398	0.0418739	5.81581e-05	33	Epithelial cells
P1_CGGACGTTCTTGTACT.1	P1	10926	2303	0.0529013	0.00018305	22	Epithelial cells
P1_CGGACTGAGCTGCGAA.1	P1	6656	743	0.0208834	0	24	B-cells
P1_CGGACTGAGGTGCACA.1	P1	15959.5	3214	0.0342743	6.26586e-05	13	Epithelial cells
P1_CGGACTGCAGGGTACA.1	P1	11872.5	2584	0.0300695	0.000168457	13	Epithelial cells
P1_CGGACTGCATTCGACA.1	P1	7035	1932	0.0392324	0.000142146	6	Epithelial cells
P1_CGGACTGGTCGAACAG.1	P1	14740	3325	0.0348033	0	22	Epithelial cells
P1_CGGACTGTCGGATGTT.1	P1	22552.5	3749	0.0597716	8.8682e-05	0	Epithelial cells
P1_CGGAGCTAGAGTCTGG.1	P1	22058.5	4029	0.0334565	0	13	Epithelial cells
P1_CGGAGCTAGTCTCAAC.1	P1	11696	2233	0.0741279	0	4	CD8+ T-cells
P1_CGGAGCTCAACTGGCC.1	P1	11880.5	2629	0.0545432	0	22	Epithelial cells
P1_CGGAGCTCATTAGCCA.1	P1	6767	1688	0.041525	0	6	Epithelial cells
P1_CGGAGCTGTTAAGACA.1	P1	10073.5	2154	0.0464585	0	22	Epithelial cells
P1_CGGAGCTTCAGCTCTC.1	P1	11909	2735	0.0672601	0	20	Fibroblasts
P1_CGGAGTCAGCTTTGGT.1	P1	10525	2123	0.0456057	0	0	Epithelial cells
P1_CGGAGTCAGGAGTACC.1	P1	10659	2432	0.059105	0	0	Epithelial cells
P1_CGGAGTCAGTTACCCA.1	P1	16726	2584	0.0413129	0	1	Epithelial cells
P1_CGGAGTCCACACAGAG.1	P1	7917	1908	0.0723759	0	3	CD8+ T-cells
P1_CGGAGTCCAGGACGTA.1	P1	20223.5	3670	0.0526615	4.94474e-05	5	Myofibroblasts
P1_CGGAGTCGTCGAATCT.1	P1	10163	2234	0.0476237	0	5	Myofibroblasts
P1_CGGAGTCGTGAGGGAG.1	P1	7956	1553	0.0690045	0	4	CD8+ T-cells
P1_CGGAGTCGTGCAGTAG.1	P1	9806	2094	0.0465021	0	22	Epithelial cells
P1_CGGAGTCTCATGCTCC.1	P1	12849	2254	0.0730796	0	4	CD8+ T-cells
P1_CGGCTAGAGAGCAATT.1	P1	7074.5	1762	0.0207789	0	32	Macrophages
P1_CGGCTAGCACCTCGGA.1	P1	8546	2269	0.0349871	0	17	Endothelial cells
P1_CGGCTAGCACTGAAGG.1	P1	9347	2187	0.0393709	0	22	Epithelial cells
P1_CGGCTAGCAGTCAGAG.1	P1	12290.5	2273	0.0780277	0	4	CD8+ T-cells
P1_CGGCTAGGTAGCGCTC.1	P1	22086	3678	0.0481753	0	12	Epithelial cells
P1_CGGCTAGTCAGGTTCA.1	P1	7555	2004	0.0401059	0	0	Epithelial cells
P1_CGGCTAGTCAGTTTGG.1	P1	7784	1868	0.0427801	0	22	Epithelial cells
P1_CGGCTAGTCATAAAGG.1	P1	38337	4861	0.0455696	0	8	Monocytes
P1_CGGCTAGTCGCGGATC.1	P1	6984	1838	0.0322165	0.000143184	13	Epithelial cells
P1_CGGGTCAAGACATAAC.1	P1	9119	2394	0.0296085	0	6	Epithelial cells
P1_CGGGTCAAGCTACCTA.1	P1	8509	2147	0.0408979	0	6	Epithelial cells
P1_CGGGTCAAGCTGCCCA.1	P1	19414.5	3154	0.055371	0	9	Epithelial cells
P1_CGGGTCACAAACTGTC.1	P1	31446.5	4740	0.0359022	3.18e-05	22	Epithelial cells
P1_CGGGTCACACTGTTAG.1	P1	9381	1387	0.0212131	0.000106598	24	B-cells
P1_CGGGTCACAGACACTT.1	P1	25397.5	3656	0.0626046	0	0	Epithelial cells
P1_CGGGTCAGTAAATGTG.1	P1	12976	3229	0.034217	0	22	Epithelial cells
P1_CGGGTCAGTCTGATTG.1	P1	11864.5	2449	0.0708837	0	8	Monocytes
P1_CGGGTCATCAGCGACC.1	P1	7490.5	654	0.00760964	0	24	B-cells
P1_CGGGTCATCCTATGTT.1	P1	12472	2508	0.0607761	0	0	Epithelial cells
P1_CGGGTCATCCTGTACC.1	P1	9465	2224	0.0331749	0	8	Monocytes
P1_CGGTTAACAAGGGTCA.1	P1	9682	1970	0.0474076	0.000103284	24	B-cells
P1_CGGTTAACACGTGAGA.1	P1	8638.5	2140	0.0333391	0.000115761	6	Epithelial cells
P1_CGGTTAACACTAAGTC.1	P1	7918	1979	0.0666835	0	22	Epithelial cells
P1_CGGTTAACAGTATCTG.1	P1	6628	1794	0.0416415	0	6	Epithelial cells
P1_CGGTTAACATCTATGG.1	P1	33054	4684	0.0466207	0	22	Epithelial cells
P1_CGGTTAACATTGAGCT.1	P1	23083	3739	0.0588745	4.33219e-05	9	Epithelial cells
P1_CGGTTAAGTAGCGTCC.1	P1	6486.5	1558	0.0294458	0.000154166	6	Epithelial cells
P1_CGGTTAAGTCTCTCTG.1	P1	18523.5	3388	0.029746	0.000161956	13	Epithelial cells
P1_CGGTTAAGTTCCCGAG.1	P1	8889	2216	0.0631117	0	6	Epithelial cells
P1_CGGTTAATCGCTTAGA.1	P1	10972	2559	0.0410135	0	1	Epithelial cells
P1_CGGTTAATCTGGTGTA.1	P1	9426.5	2354	0.0757439	0.000106084	12	Epithelial cells
P1_CGTAGCGAGCAACGGT.1	P1	9032	2266	0.0455049	0.000110717	6	Epithelial cells
P1_CGTAGCGAGGACAGAA.1	P1	28654.5	4195	0.0641435	0	22	Epithelial cells
P1_CGTAGCGCAGCCAGAA.1	P1	19525.5	3818	0.0427646	0	5	Myofibroblasts
P1_CGTAGCGGTAGAGTGC.1	P1	13368.5	2596	0.0670232	0.000224408	22	Epithelial cells
P1_CGTAGCGGTGACTACT.1	P1	11016	2463	0.046841	9.07771e-05	5	Myofibroblasts
P1_CGTAGCGGTGCCTGGT.1	P1	8134	1948	0.033194	0	0	Epithelial cells
P1_CGTAGGCAGAGCAATT.1	P1	13952.5	2513	0.060491	7.16717e-05	3	CD8+ T-cells
P1_CGTAGGCAGAGCTGGT.1	P1	12009	2231	0.0536264	0	0	Epithelial cells
P1_CGTAGGCAGCCTTGAT.1	P1	7244	1902	0.0318885	0.000138045	3	CD8+ T-cells
P1_CGTAGGCCACAGATTC.1	P1	11671	2662	0.0532088	0	12	Epithelial cells
P1_CGTAGGCGTCTAGCGC.1	P1	12907.5	2419	0.0506682	7.74743e-05	0	Epithelial cells
P1_CGTAGGCGTGCAGACA.1	P1	7374.5	1900	0.0440708	0.00420367	32	Macrophages
P1_CGTAGGCGTTACGGAG.1	P1	15511	3288	0.0310103	0	13	Epithelial cells
P1_CGTAGGCTCCCTAACC.1	P1	13340.5	3006	0.0236123	0	20	Epithelial cells
P1_CGTCACTAGGGAAACA.1	P1	11300	2286	0.0617699	0	0	Epithelial cells
P1_CGTCACTCAAACTGCT.1	P1	9809	2241	0.0542359	0	0	Epithelial cells
P1_CGTCACTCACTCGACG.1	P1	15755.5	3237	0.045381	0	12	Epithelial cells
P1_CGTCACTCAGTCGTGC.1	P1	18677	3375	0.0722279	0	12	Epithelial cells
P1_CGTCACTGTGAAGGCT.1	P1	15433	2720	0.0358323	6.47962e-05	0	Epithelial cells
P1_CGTCACTGTTTACTCT.1	P1	10941	2615	0.0388447	0.000274198	12	Epithelial cells
P1_CGTCACTTCAGCTGGC.1	P1	15746.5	2715	0.0745563	0	4	CD8+ T-cells
P1_CGTCACTTCCAGTATG.1	P1	11015	2939	0.0743532	9.07853e-05	0	Epithelial cells
P1_CGTCAGGCAACGCACC.1	P1	10445	2632	0.046338	0	6	Epithelial cells
P1_CGTCAGGCAAGGTTTC.1	P1	11411.5	2335	0.0424134	0	0	Epithelial cells
P1_CGTCAGGGTGGTACAG.1	P1	6586	1972	0.0303674	0	17	Endothelial cells
P1_CGTCAGGTCGAATGGG.1	P1	6506.5	1463	0.0493353	0	7	Mast
P1_CGTCAGGTCGCCTGTT.1	P1	10234	2160	0.0458276	0	0	Epithelial cells
P1_CGTCCATAGCCCTAAT.1	P1	14318	2422	0.0233971	0	2	Fibroblasts
P1_CGTCCATAGGGATCTG.1	P1	6578	1697	0.0582244	0	22	Epithelial cells
P1_CGTCCATAGTACGTTC.1	P1	16900	2563	0.0447929	5.91716e-05	4	CD8+ T-cells
P1_CGTCCATCACGCTTTC.1	P1	8069.5	2120	0.0285024	0	13	Epithelial cells
P1_CGTCCATCACTGAAGG.1	P1	18889.5	3237	0.041081	5.29395e-05	6	Epithelial cells
P1_CGTCCATCACTTAAGC.1	P1	18581.5	3729	0.0300299	0	6	Epithelial cells
P1_CGTCCATCAGTAAGCG.1	P1	16255	3543	0.0285451	0	10	Epithelial cells
P1_CGTCCATGTAATTGGA.1	P1	18547	3478	0.0517604	5.39171e-05	0	Epithelial cells
P1_CGTCCATGTGTTCTTT.1	P1	18883	3318	0.0680506	0	9	Epithelial cells
P1_CGTCCATTCACTGGGC.1	P1	17096.5	2958	0.0517065	0	8	Monocytes
P1_CGTCCATTCTACTATC.1	P1	17339.5	3685	0.049194	0	12	Epithelial cells
P1_CGTCTACAGGCCCTCA.1	P1	7600.5	2133	0.0432866	0.00013157	13	Epithelial cells
P1_CGTCTACGTATGAAAC.1	P1	11932	2654	0.0780255	8.38082e-05	12	Epithelial cells
P1_CGTGAGCAGATATGCA.1	P1	9544	2619	0.0613998	0	0	Epithelial cells
P1_CGTGAGCGTATAGGGC.1	P1	13945	2505	0.0375045	0	18	Epithelial cells
P1_CGTGAGCGTGCAACGA.1	P1	8351	1782	0.0762783	0.000119746	4	CD8+ T-cells
P1_CGTGAGCGTGCAGGTA.1	P1	12481	2701	0.0334909	8.01218e-05	6	Epithelial cells
P1_CGTGAGCTCGGCGCAT.1	P1	9691	1846	0.0778041	0.000103189	4	CD8+ T-cells
P1_CGTGTAAGTTTGCATG.1	P1	14733	2532	0.0462906	0.00013575	9	Epithelial cells
P1_CGTGTCTAGACCGGAT.1	P1	24039.5	3391	0.0284532	4.15982e-05	12	Epithelial cells
P1_CGTGTCTAGGTGATAT.1	P1	12966	2249	0.0676384	0	4	CD8+ T-cells
P1_CGTGTCTCAACACCTA.1	P1	20635	3582	0.065859	4.84614e-05	22	Epithelial cells
P1_CGTGTCTGTCATGCAT.1	P1	12065	2313	0.040116	0	0	Epithelial cells
P1_CGTGTCTGTTTGACAC.1	P1	6760	1871	0.0523669	0	1	Epithelial cells
P1_CGTTAGAAGAGTCTGG.1	P1	12127	2002	0.0493939	0	12	Epithelial cells
P1_CGTTAGAAGGCGATAC.1	P1	16137.5	2486	0.0656235	6.19675e-05	24	B-cells
P1_CGTTAGACACATCTTT.1	P1	9671	1750	0.0282287	0	12	Epithelial cells
P1_CGTTAGAGTACCTACA.1	P1	6462.5	1740	0.0297099	0	6	Epithelial cells
P1_CGTTAGAGTAGAAAGG.1	P1	12901.5	2216	0.0456536	0	11	Epithelial cells
P1_CGTTAGAGTCATATGC.1	P1	12124	2393	0.0625206	0	9	Epithelial cells
P1_CGTTAGATCAGTCAGT.1	P1	12566	2668	0.044326	0	12	Epithelial cells
P1_CGTTAGATCGTTGCCT.1	P1	27427	3827	0.0348197	0	1	Epithelial cells
P1_CGTTCTGAGTGGGCTA.1	P1	8397	2030	0.0346552	0	12	Epithelial cells
P1_CGTTCTGAGTGGGTTG.1	P1	8070	2026	0.085254	0	4	CD8+ T-cells
P1_CGTTCTGCAAGCCCAC.1	P1	18882	3304	0.04025	0	1	Epithelial cells
P1_CGTTCTGCAGCCTTGG.1	P1	13972.5	3524	0.0679191	0	15	Endothelial cells
P1_CGTTCTGCATTTCAGG.1	P1	6866.5	2070	0.0313114	0.000291269	31	Endothelial cells
P1_CGTTCTGGTGATGTCT.1	P1	8910	1966	0.0565657	0	7	Mast
P1_CGTTCTGGTGTGCCTG.1	P1	7102.5	1743	0.0408307	0	7	Mast
P1_CGTTCTGGTTCGTCTC.1	P1	37057	4863	0.0245298	2.69855e-05	12	Epithelial cells
P1_CGTTCTGTCAACTCTT.1	P1	10216.5	2460	0.0522684	0	1	Epithelial cells
P1_CGTTCTGTCCACGAAT.1	P1	14817	2908	0.0491328	6.749e-05	22	Epithelial cells
P1_CGTTCTGTCCAGTATG.1	P1	7167	1332	0.0531603	0.000139528	4	CD8+ T-cells
P1_CGTTGGGAGTAAGTAC.1	P1	12553.5	2643	0.0501852	0	0	Epithelial cells
P1_CGTTGGGCACCCATGG.1	P1	9052.5	2294	0.0435239	0.000220933	6	Epithelial cells
P1_CGTTGGGCATATGCTG.1	P1	9421	2290	0.0541344	0	0	Epithelial cells
P1_CGTTGGGGTAAGGGAA.1	P1	11443	2334	0.0335576	0	1	Epithelial cells
P1_CTAACTTAGGACAGAA.1	P1	9862	2317	0.0592172	0	9	Epithelial cells
P1_CTAACTTAGGCATGTG.1	P1	11334.5	1958	0.0458776	0	4	CD8+ T-cells
P1_CTAACTTCAAGAGTCG.1	P1	13962.5	3328	0.0390331	0	12	Epithelial cells
P1_CTAACTTCAAGCCTAT.1	P1	36661.5	5204	0.0543622	2.72766e-05	8	Monocytes
P1_CTAACTTGTAGGCTGA.1	P1	6603	1563	0.0271089	0	8	Monocytes
P1_CTAACTTGTCTAAACC.1	P1	18393	3467	0.0330561	0	8	Monocytes
P1_CTAACTTGTTGTTTGG.1	P1	10330.5	2257	0.0675669	0	0	Epithelial cells
P1_CTAACTTGTTTGTTTC.1	P1	18051.5	3439	0.0306346	0	12	Epithelial cells
P1_CTAACTTTCCTCCTAG.1	P1	8737.5	1854	0.0805722	0.000114449	3	CD8+ T-cells
P1_CTAACTTTCTTATCTG.1	P1	8494.5	2222	0.0288422	0	23	B-cells
P1_CTAAGACAGACTACAA.1	P1	7182	1718	0.0277082	0	1	Epithelial cells
P1_CTAAGACAGCGTTCCG.1	P1	10233.5	2670	0.0434846	0	20	Epithelial cells
P1_CTAAGACCACCGAATT.1	P1	18380.5	3794	0.0415658	0	13	Epithelial cells
P1_CTAAGACCACCGCTAG.1	P1	33407.5	3947	0.0597171	0	0	Epithelial cells
P1_CTAAGACGTCCTGCTT.1	P1	24997	4038	0.0597272	0	0	Epithelial cells
P1_CTAAGACGTGTGACGA.1	P1	6943	2146	0.0388881	0	2	Fibroblasts
P1_CTAAGACGTTAAGTAG.1	P1	13936	3309	0.0478617	7.17566e-05	8	Monocytes
P1_CTAAGACGTTCAGACT.1	P1	11111	2799	0.0555306	0	6	Epithelial cells
P1_CTAAGACGTTCGGCAC.1	P1	24434.5	3801	0.0377745	8.18515e-05	12	Epithelial cells
P1_CTAAGACGTTGAGGTG.1	P1	17902.5	3120	0.0451892	0	12	Epithelial cells
P1_CTAAGACTCGGCGCAT.1	P1	16875.5	3142	0.0381026	0	19	Epithelial cells
P1_CTAATGGCAAGTAGTA.1	P1	15738.5	2952	0.0326588	6.35385e-05	11	Epithelial cells
P1_CTAATGGCAGTCAGAG.1	P1	7103	1727	0.0408278	0	12	Epithelial cells
P1_CTAATGGGTAGCGTCC.1	P1	11595	2437	0.051574	0	22	Epithelial cells
P1_CTAATGGGTCAGAGGT.1	P1	12215.5	2830	0.0493635	0	12	Epithelial cells
P1_CTAATGGGTGATGATA.1	P1	6481	2014	0.0339454	0.000154297	13	Epithelial cells
P1_CTAATGGTCCATTCTA.1	P1	17932	3260	0.0422708	0	15	Endothelial cells
P1_CTAATGGTCGTAGATC.1	P1	7727	1694	0.047884	0.000129416	0	Epithelial cells
P1_CTACACCAGAGGGCTT.1	P1	7888	1980	0.071501	0	22	Epithelial cells
P1_CTACACCAGGCCGAAT.1	P1	11308	2631	0.077202	0	22	Epithelial cells
P1_CTACACCCAATGAAAC.1	P1	34341.5	4724	0.0525021	2.91193e-05	9	Epithelial cells
P1_CTACACCCATCGTCGG.1	P1	16597	3096	0.0110863	0	12	Epithelial cells
P1_CTACACCGTCTGGAGA.1	P1	29096.5	4578	0.0206554	0	13	Epithelial cells
P1_CTACACCGTTTGTTTC.1	P1	6947	1753	0.0509572	0.000143947	0	Epithelial cells
P1_CTACACCTCATTGCCC.1	P1	23070	3390	0.0496316	0	3	CD8+ T-cells
P1_CTACACCTCCAGGGCT.1	P1	18048	2745	0.0574025	0	0	Epithelial cells
P1_CTACACCTCGTCGTTC.1	P1	9566	2150	0.049655	0.000104537	19	Epithelial cells
P1_CTACATTAGATAGGAG.1	P1	8041	2290	0.0330805	0	8	Macrophages
P1_CTACATTCAACTGCGC.1	P1	11662	2265	0.0342137	0.000171497	10	Epithelial cells
P1_CTACATTCAAGAAGAG.1	P1	10505	2108	0.0258924	0	8	Monocytes
P1_CTACATTCAAGCGCTC.1	P1	19022.5	2921	0.0356946	0	0	Epithelial cells
P1_CTACATTCAGATCCAT.1	P1	7038	1709	0.0336743	0	1	Epithelial cells
P1_CTACATTGTCGAAAGC.1	P1	13813	2950	0.0566133	7.23956e-05	5	Myofibroblasts
P1_CTACATTGTTAGGGTG.1	P1	7596	769	0.0138231	0.000131648	24	B-cells
P1_CTACCCAAGTGGGCTA.1	P1	6506	1776	0.0430372	0	2	Fibroblasts
P1_CTACCCACAAACAACA.1	P1	19710	3541	0.05931	0	5	Myofibroblasts
P1_CTACCCACAAATCCGT.1	P1	23201.5	3569	0.0375838	4.31007e-05	12	Epithelial cells
P1_CTACCCACACCAGGTC.1	P1	21605.5	4006	0.0243457	0	13	Epithelial cells
P1_CTACCCACATCCGCGA.1	P1	9759	2300	0.0577928	0.000204939	3	CD8+ T-cells
P1_CTACCCACATGAGCGA.1	P1	9629	2644	0.085471	0	8	Macrophages
P1_CTACCCATCAAGGTAA.1	P1	12284	2585	0.038424	0	10	Epithelial cells
P1_CTACCCATCCGCGTTT.1	P1	20404	3555	0.0645462	4.901e-05	23	B-cells
P1_CTACCCATCGTGGTCG.1	P1	10259.5	2190	0.0388908	9.74706e-05	24	B-cells
P1_CTACGTCAGACTAGAT.1	P1	13511	2576	0.0628377	7.40138e-05	4	CD8+ T-cells
P1_CTACGTCAGCATCATC.1	P1	8678.5	2284	0.0270784	0.000115227	13	Epithelial cells
P1_CTACGTCAGTATGACA.1	P1	15283.5	3546	0.0468479	0	8	Monocytes
P1_CTACGTCAGTCATCCA.1	P1	6777	2201	0.0374797	0	17	Endothelial cells
P1_CTACGTCCACCGGAAA.1	P1	6719.5	1746	0.0534266	0.000148821	6	Epithelial cells
P1_CTACGTCCAGCCAATT.1	P1	9646	1947	0.0490359	0	0	Epithelial cells
P1_CTACGTCCAGCGTTCG.1	P1	9725	2094	0.031671	0	6	Epithelial cells
P1_CTACGTCGTACCGCTG.1	P1	27526.5	4430	0.0320782	3.63286e-05	13	Epithelial cells
P1_CTACGTCGTGGCTCCA.1	P1	12475.5	2625	0.0696565	0	20	Fibroblasts
P1_CTACGTCGTTCCACGG.1	P1	20685.5	3166	0.0623142	0	0	Epithelial cells
P1_CTACGTCTCGCCTGAG.1	P1	7799	1952	0.0466727	0	6	Epithelial cells
P1_CTAGAGTAGCACCGTC.1	P1	10530.5	2285	0.042828	0	3	CD8+ T-cells
P1_CTAGAGTAGCGAAGGG.1	P1	6967.5	1891	0.0409042	0	6	Epithelial cells
P1_CTAGAGTAGGAATGGA.1	P1	10888	2323	0.056576	0	0	Epithelial cells
P1_CTAGAGTCAAGACACG.1	P1	7615.5	2074	0.0770796	0	6	Epithelial cells
P1_CTAGAGTCAATGACCT.1	P1	29788.5	4533	0.0372291	0.00010071	9	Epithelial cells
P1_CTAGAGTCAGCCTTGG.1	P1	7482	2351	0.0231222	0	16	Epithelial cells
P1_CTAGAGTCAGCTGGCT.1	P1	11784	2214	0.0434487	0	0	Epithelial cells
P1_CTAGAGTGTAAGAGAG.1	P1	8614	2119	0.0646622	0.00011609	22	Epithelial cells
P1_CTAGAGTGTCAGAATA.1	P1	9351	1763	0.0295156	0	0	Epithelial cells
P1_CTAGAGTGTTGCTCCT.1	P1	9498	1786	0.038745	0	12	Epithelial cells
P1_CTAGAGTTCACTTCAT.1	P1	14974	2542	0.0649125	0	4	CD8+ T-cells
P1_CTAGAGTTCTAACCGA.1	P1	25629.5	4374	0.091301	0	9	Epithelial cells
P1_CTAGAGTTCTAGAGTC.1	P1	16758.5	3087	0.047916	0	22	Epithelial cells
P1_CTAGCCTAGACCGGAT.1	P1	28839	3643	0.0433441	3.46753e-05	1	Epithelial cells
P1_CTAGCCTAGCCAACAG.1	P1	7812	2189	0.0574757	0	4	CD8+ T-cells
P1_CTAGCCTAGCTCTCGG.1	P1	14101	2701	0.0593575	0	3	CD8+ T-cells
P1_CTAGCCTAGTCATCCA.1	P1	25829.5	4212	0.0560599	0	22	Epithelial cells
P1_CTAGCCTAGTGGGCTA.1	P1	8498	2108	0.0210638	0.000117675	12	Epithelial cells
P1_CTAGCCTCACAGTCGC.1	P1	19989.5	2686	0.0560294	0	24	B-cells
P1_CTAGCCTGTCATCCCT.1	P1	7003	1744	0.0284164	0	6	Epithelial cells
P1_CTAGCCTGTCGGCATC.1	P1	28238.5	4078	0.0619721	0	24	B-cells
P1_CTAGCCTGTGAAAGAG.1	P1	7724.5	1939	0.0424623	0	12	Epithelial cells
P1_CTAGCCTTCGGCTACG.1	P1	23482.5	3315	0.0478228	0	0	Epithelial cells
P1_CTAGTGAAGTGGGCTA.1	P1	19339.5	3568	0.0711497	0	0	Epithelial cells
P1_CTAGTGAAGTTAACGA.1	P1	7771	1844	0.0782396	0	6	Epithelial cells
P1_CTAGTGACAAGCGAGT.1	P1	17978	3043	0.0605184	0	3	CD8+ T-cells
P1_CTAGTGACAATAGCAA.1	P1	24297.5	4115	0.0644511	4.11565e-05	9	Epithelial cells
P1_CTAGTGAGTATAGTAG.1	P1	8088	2042	0.0429031	0	12	Epithelial cells
P1_CTAGTGATCGAACTGT.1	P1	19026	3162	0.0336907	0	13	Epithelial cells
P1_CTCACACAGACTCGGA.1	P1	10201	2381	0.036565	0.000980296	6	Epithelial cells
P1_CTCACACAGGCAGGTT.1	P1	13291	2484	0.0597397	0	22	Epithelial cells
P1_CTCACACAGTACGATA.1	P1	17275.5	3175	0.0361205	0	9	Epithelial cells
P1_CTCACACAGTCTCCTC.1	P1	10990	2729	0.0419472	9.09918e-05	1	Epithelial cells
P1_CTCACACCAAGCGATG.1	P1	13776	2880	0.0493612	0	8	Macrophages
P1_CTCACACCACATTTCT.1	P1	8725	2702	0.0361032	0.000229226	17	Endothelial cells
P1_CTCACACCATCCGCGA.1	P1	10389.5	2483	0.0596756	0	12	Epithelial cells
P1_CTCACACCATCGGGTC.1	P1	13118	2506	0.0532856	7.62311e-05	22	Epithelial cells
P1_CTCACACGTGTGGTTT.1	P1	7817	1988	0.0440067	0	12	Epithelial cells
P1_CTCACACGTTGATTCG.1	P1	14102.5	2722	0.0482893	0	3	CD8+ T-cells
P1_CTCAGAAAGGGCTTGA.1	P1	8625	2696	0.0445217	0	21	Macrophages
P1_CTCAGAACAGCTCCGA.1	P1	6614.5	676	0.00695442	0.000302366	24	B-cells
P1_CTCAGAAGTACTCTCC.1	P1	14869	2637	0.0525254	0	0	Epithelial cells
P1_CTCAGAAGTCGCGAAA.1	P1	10318	2312	0.0499128	9.6918e-05	0	Epithelial cells
P1_CTCAGAAGTCGCTTTC.1	P1	26066	3297	0.0341825	3.83642e-05	1	Epithelial cells
P1_CTCAGAAGTTGTACAC.1	P1	13552	2725	0.0447904	0	1	Epithelial cells
P1_CTCAGAATCAACTCTT.1	P1	12376.5	2831	0.045651	0	22	Epithelial cells
P1_CTCAGAATCCAAAGTC.1	P1	6480	1822	0.0419753	0	6	Epithelial cells
P1_CTCAGAATCCCTAATT.1	P1	10186.5	2098	0.0485937	0	0	Epithelial cells
P1_CTCAGAATCTGCGTAA.1	P1	13782	2563	0.0470178	0	0	Epithelial cells
P1_CTCATTAAGATCTGAA.1	P1	16582	3069	0.0557834	6.03064e-05	12	Epithelial cells
P1_CTCATTAAGTAGGTGC.1	P1	15271.5	3241	0.061618	6.54815e-05	8	Monocytes
P1_CTCATTACATCCTTGC.1	P1	22046.5	3888	0.0551108	4.53587e-05	12	Epithelial cells
P1_CTCATTACATGCCCGA.1	P1	9831	2035	0.0793409	0	4	CD8+ T-cells
P1_CTCATTAGTCCGAGTC.1	P1	9271	2263	0.0595405	0.000215726	0	Epithelial cells
P1_CTCATTAGTGTGCCTG.1	P1	10775	2532	0.0515081	9.28074e-05	6	Epithelial cells
P1_CTCATTATCAAACCAC.1	P1	19256	3236	0.0634607	0	12	Epithelial cells
P1_CTCATTATCAACCAAC.1	P1	8022	1992	0.0522314	0	0	Epithelial cells
P1_CTCCTAGAGTTAACGA.1	P1	37667.5	4488	0.0394505	0	1	Epithelial cells
P1_CTCCTAGGTCTTGTCC.1	P1	10047.5	1768	0.0376213	9.95272e-05	12	Epithelial cells
P1_CTCCTAGGTTGATTCG.1	P1	9582	2049	0.0219161	0.000104362	2	Fibroblasts
P1_CTCCTAGTCCCAACGG.1	P1	6997	1854	0.0341575	0	22	Epithelial cells
P1_CTCCTAGTCGTACCGG.1	P1	13149	2942	0.0789414	0	9	Epithelial cells
P1_CTCGAAAAGCCGCCTA.1	P1	7228	2353	0.0742944	0	20	Fibroblasts
P1_CTCGAAAAGTGCGTGA.1	P1	13763	2653	0.0279009	0	22	Epithelial cells
P1_CTCGAAACAACTTGAC.1	P1	7165	2114	0.0414515	0.000279135	17	Endothelial cells
P1_CTCGAAACAAGCGTAG.1	P1	9401	2431	0.0212743	0	12	Epithelial cells
P1_CTCGAAACACATAACC.1	P1	14893	2595	0.0509635	6.71456e-05	0	Epithelial cells
P1_CTCGAAACACTGAAGG.1	P1	25691	4602	0.0414153	0	15	Endothelial cells
P1_CTCGAAATCATCGGAT.1	P1	14689	2874	0.0460208	6.80782e-05	9	Epithelial cells
P1_CTCGAAATCCAAGCCG.1	P1	8181	2159	0.0356925	0.000244469	2	Fibroblasts
P1_CTCGAGGAGCTGCAAG.1	P1	11875.5	2708	0.0360406	0	13	Epithelial cells
P1_CTCGAGGAGGCAGTCA.1	P1	38410.5	4950	0.0480598	0	12	Epithelial cells
P1_CTCGAGGAGGGTTTCT.1	P1	13691.5	2735	0.0331593	0	1	Epithelial cells
P1_CTCGAGGCACGAAACG.1	P1	12615.5	2934	0.0329753	7.92676e-05	13	Epithelial cells
P1_CTCGAGGCAGCTGCAC.1	P1	8847.5	2386	0.0328906	0	5	Myofibroblasts
P1_CTCGAGGCAGGATCGA.1	P1	23650.5	4119	0.0699774	0	22	Epithelial cells
P1_CTCGAGGTCAAACAAG.1	P1	13787	2803	0.0746355	0	9	Epithelial cells
P1_CTCGAGGTCACTGGGC.1	P1	37276.5	4650	0.0572747	2.68266e-05	9	Epithelial cells
P1_CTCGGAGGTAGCGCAA.1	P1	10747.5	2292	0.0806699	0	9	Epithelial cells
P1_CTCGGAGGTCACACGC.1	P1	13570	3049	0.0327192	7.3692e-05	13	Epithelial cells
P1_CTCGGAGGTGAGTGAC.1	P1	7458	2527	0.0281577	0	6	Epithelial cells
P1_CTCGGAGTCGACCAGC.1	P1	8877	2452	0.065788	0	20	Myofibroblasts
P1_CTCGGAGTCGGATGGA.1	P1	15346.5	3448	0.0614472	0	15	Endothelial cells
P1_CTCGGGAAGCAGGCTA.1	P1	13230	2893	0.048904	7.55858e-05	13	Epithelial cells
P1_CTCGGGAAGTACGTAA.1	P1	17263.5	3015	0.0421699	5.79257e-05	11	Epithelial cells
P1_CTCGGGACAGTGGGAT.1	P1	12213.5	2283	0.0636181	0	4	CD8+ T-cells
P1_CTCGGGACATGGTCAT.1	P1	12196	2436	0.0627255	0	0	Epithelial cells
P1_CTCGGGATCACCATAG.1	P1	11657	2582	0.027966	0	6	Epithelial cells
P1_CTCGGGATCGGAATCT.1	P1	30190	3698	0.0544882	0	0	Epithelial cells
P1_CTCGGGATCTTTACGT.1	P1	14160	3033	0.0389124	0	13	Epithelial cells
P1_CTCGTACAGAGTAATC.1	P1	11870.5	3150	0.0405206	0	9	Epithelial cells
P1_CTCGTACCACAGTCGC.1	P1	15916.5	3488	0.0515189	0	8	Macrophages
P1_CTCGTACCATAGTAAG.1	P1	11756.5	2474	0.0801259	8.50593e-05	4	CD8+ T-cells
P1_CTCGTACGTGCGGTAA.1	P1	7044.5	2323	0.0806303	0	6	Epithelial cells
P1_CTCGTACGTGCTCTTC.1	P1	19589.5	3505	0.0349167	0	22	Epithelial cells
P1_CTCGTACGTTTGTTTC.1	P1	7160	1626	0.0425978	0	0	Epithelial cells
P1_CTCGTACTCCCTTGCA.1	P1	6514	1460	0.0405281	0.000153516	9	Epithelial cells
P1_CTCGTACTCCGCGGTA.1	P1	13351	2292	0.0494345	0	22	Epithelial cells
P1_CTCGTACTCTAAGCCA.1	P1	9218	2280	0.0366674	0	6	Epithelial cells
P1_CTCGTACTCTGCCCTA.1	P1	36836.5	4265	0.0382501	0	1	Epithelial cells
P1_CTCGTCACAAGTCATC.1	P1	13742	2617	0.0408965	7.27696e-05	19	Epithelial cells
P1_CTCGTCACATGCTAGT.1	P1	20597.5	3362	0.0407816	0	1	Epithelial cells
P1_CTCGTCAGTAGTACCT.1	P1	24425	4455	0.0259161	4.09417e-05	13	Epithelial cells
P1_CTCGTCATCCAAACAC.1	P1	11899.5	2758	0.0365562	0	13	Epithelial cells
P1_CTCGTCATCCAAATGC.1	P1	9659.5	2266	0.0476215	0	28	Epithelial cells
P1_CTCGTCATCGAATCCA.1	P1	11798.5	2297	0.0493283	0	12	Epithelial cells
P1_CTCTAATAGAAACCGC.1	P1	12054	2807	0.0534262	0	6	Epithelial cells
P1_CTCTAATAGTTAGGTA.1	P1	18676	3275	0.062915	0	0	Epithelial cells
P1_CTCTAATCACGAAGCA.1	P1	11122.5	1799	0.0614071	0	4	CD8+ T-cells
P1_CTCTAATCACTCTGTC.1	P1	12069.5	2712	0.0431667	8.28535e-05	6	Epithelial cells
P1_CTCTAATCAGGAATCG.1	P1	9658	1978	0.085732	0	23	B-cells
P1_CTCTAATGTACAGTGG.1	P1	8678	2361	0.0469002	0	6	Epithelial cells
P1_CTCTAATTCTGCAAGT.1	P1	7475.5	1934	0.0643435	0	0	Epithelial cells
P1_CTCTACGAGAATCTCC.1	P1	6967	1921	0.0292809	0	13	Epithelial cells
P1_CTCTACGAGACAGACC.1	P1	7046	1884	0.0239852	0.000141924	2	Fibroblasts
P1_CTCTACGAGAGCCTAG.1	P1	22367.5	3343	0.0505644	0	0	Epithelial cells
P1_CTCTACGAGGCAAAGA.1	P1	9764	2227	0.0535641	0.000204834	11	Epithelial cells
P1_CTCTACGCAGTGGAGT.1	P1	8159	2417	0.0546636	0.000122564	20	Epithelial cells
P1_CTCTACGGTGAGTGAC.1	P1	11642	2325	0.0391685	8.58959e-05	9	Epithelial cells
P1_CTCTACGGTTCAACCA.1	P1	14196.5	2934	0.0274011	0	5	Myofibroblasts
P1_CTCTACGTCAGAGACG.1	P1	19771	3746	0.0351019	0	9	Epithelial cells
P1_CTCTACGTCCAAATGC.1	P1	11607	2426	0.042819	0	8	Monocytes
P1_CTCTGGTAGATCGATA.1	P1	34291	5175	0.0396897	0	13	Epithelial cells
P1_CTCTGGTCAAACCTAC.1	P1	14643	2437	0.0317558	0.000887796	1	Epithelial cells
P1_CTCTGGTCACGGCTAC.1	P1	13024	2203	0.0621929	7.67813e-05	4	CD8+ T-cells
P1_CTCTGGTCATAGTAAG.1	P1	12450.5	2778	0.0551785	8.03181e-05	6	Epithelial cells
P1_CTCTGGTCATGCATGT.1	P1	11306.5	2260	0.0341397	0	24	B-cells
P1_CTCTGGTGTAGCCTCG.1	P1	11974	2385	0.0419242	8.35143e-05	0	Epithelial cells
P1_CTCTGGTGTGTTTGGT.1	P1	17567	3431	0.0531109	5.69249e-05	22	Epithelial cells
P1_CTCTGGTTCATTGCGA.1	P1	7584	1920	0.0353376	0	6	Epithelial cells
P1_CTCTGGTTCCGCGCAA.1	P1	6593	1464	0.027605	0	2	Fibroblasts
P1_CTGAAACAGATGCCTT.1	P1	15763	3149	0.0439003	6.34397e-05	12	Epithelial cells
P1_CTGAAACAGCGAAGGG.1	P1	21091	4243	0.04253	0	20	Fibroblasts
P1_CTGAAACCACTTCTGC.1	P1	25581.5	3899	0.0595743	3.90907e-05	0	Epithelial cells
P1_CTGAAACCATATACCG.1	P1	9350.5	2364	0.0273782	0	5	Myofibroblasts
P1_CTGAAACGTAGAAAGG.1	P1	21314.5	2766	0.0421779	0	12	Epithelial cells
P1_CTGAAACGTTCCACTC.1	P1	28065	3994	0.0622127	3.56316e-05	22	Epithelial cells
P1_CTGAAACGTTCTGAAC.1	P1	21256	3765	0.0641231	4.70455e-05	12	Epithelial cells
P1_CTGAAACTCCTCCTAG.1	P1	30412	4651	0.0634289	0	9	Epithelial cells
P1_CTGAAACTCTCAACTT.1	P1	12342.5	2687	0.0476403	0	22	Epithelial cells
P1_CTGAAACTCTGTTTGT.1	P1	22065	3634	0.0505778	4.53206e-05	0	Epithelial cells
P1_CTGAAACTCTTAGCCC.1	P1	24564.5	3957	0.0720959	0	0	Epithelial cells
P1_CTGAAGTAGACAGACC.1	P1	35843	4421	0.0456156	5.57989e-05	1	Epithelial cells
P1_CTGAAGTCAGGAACGT.1	P1	13444	2963	0.0611425	7.43826e-05	5	Myofibroblasts
P1_CTGAAGTCAGTGAGTG.1	P1	25990.5	3919	0.0739501	0	22	Epithelial cells
P1_CTGAAGTGTATTCTCT.1	P1	26274.5	4384	0.0400769	7.61194e-05	20	Fibroblasts
P1_CTGAAGTGTCACAAGG.1	P1	6862	1747	0.0648499	0	0	Epithelial cells
P1_CTGAAGTGTTCCCTTG.1	P1	8177	2020	0.0604134	0	0	Epithelial cells
P1_CTGAAGTTCGACAGCC.1	P1	17481.5	3237	0.0407288	0.000114407	22	Epithelial cells
P1_CTGAAGTTCTCTTATG.1	P1	14479.5	3410	0.0495183	0.000138126	9	Epithelial cells
P1_CTGATAGAGACTAGGC.1	P1	19021.5	3418	0.0588807	0	22	Epithelial cells
P1_CTGATAGAGCGTTTAC.1	P1	20407	3272	0.0628216	4.90028e-05	4	CD8+ T-cells
P1_CTGATAGAGGCTCAGA.1	P1	25898	4242	0.0667233	0	12	Epithelial cells
P1_CTGATAGGTCTCTTAT.1	P1	11699	2328	0.0343619	0	10	Epithelial cells
P1_CTGATAGGTGTAACGG.1	P1	11896	2303	0.0510256	0	0	Epithelial cells
P1_CTGATAGTCCTAGAAC.1	P1	7683.5	1770	0.0248585	0.000260298	17	Endothelial cells
P1_CTGATAGTCGATCCCT.1	P1	9469	2545	0.0369627	0	20	Fibroblasts
P1_CTGATAGTCTGTACGA.1	P1	11475	2354	0.0591721	0	0	Epithelial cells
P1_CTGATCCAGAAAGTGG.1	P1	6785.5	1864	0.0361064	0.000147373	6	Epithelial cells
P1_CTGATCCAGAGCAATT.1	P1	17944	3017	0.050992	0.000111458	0	Epithelial cells
P1_CTGATCCAGGGCATGT.1	P1	6673	1957	0.0323692	0	6	Epithelial cells
P1_CTGATCCAGGTGACCA.1	P1	24177	3983	0.0290359	0.000124085	1	Epithelial cells
P1_CTGATCCAGTTAAGTG.1	P1	38451	4957	0.043666	2.60071e-05	12	Epithelial cells
P1_CTGATCCCACCGCTAG.1	P1	19878.5	3665	0.0593606	5.03056e-05	11	Epithelial cells
P1_CTGATCCCATCGGACC.1	P1	11308	2430	0.0665016	8.8433e-05	8	Monocytes
P1_CTGATCCGTACATCCA.1	P1	15135	2722	0.0435415	0.000132144	15	Endothelial cells
P1_CTGATCCGTAGCGCTC.1	P1	11709	2133	0.0550858	0	4	CD8+ T-cells
P1_CTGATCCTCATGGTCA.1	P1	12714	2892	0.0482932	0	0	Epithelial cells
P1_CTGATCCTCTCGAGTA.1	P1	13349	3081	0.0783579	0	12	Epithelial cells
P1_CTGCCTAAGGCATTGG.1	P1	8449	2037	0.0487632	0	8	Monocytes
P1_CTGCCTAAGTAGGTGC.1	P1	16443	2598	0.071459	0.000121632	4	CD8+ T-cells
P1_CTGCCTAAGTCATGCT.1	P1	11894	2480	0.0718009	0	4	CD8+ T-cells
P1_CTGCCTACACTGAAGG.1	P1	10587	2392	0.0394824	0.0204024	20	Fibroblasts
P1_CTGCCTACAGACGCCT.1	P1	15205	3248	0.0430122	0.000131536	6	Epithelial cells
P1_CTGCCTAGTAACGCGA.1	P1	9044	1947	0.0973021	0	3	CD8+ T-cells
P1_CTGCCTAGTAAGCACG.1	P1	35483.5	5183	0.0575479	2.81821e-05	12	Epithelial cells
P1_CTGCCTAGTACGCTGC.1	P1	17069.5	2769	0.0844196	5.8584e-05	4	CD8+ T-cells
P1_CTGCCTAGTCCAAGTT.1	P1	12041.5	2920	0.0303949	8.30461e-05	12	Epithelial cells
P1_CTGCCTAGTCTGCGGT.1	P1	10328	2603	0.0299187	9.68242e-05	13	Epithelial cells
P1_CTGCCTATCACGCGGT.1	P1	11548	2668	0.0572393	0	5	Myofibroblasts
P1_CTGCCTATCACTGGGC.1	P1	12979	2298	0.0806688	7.70475e-05	4	CD8+ T-cells
P1_CTGCCTATCAGCTCTC.1	P1	18076	3565	0.0333592	0	15	Endothelial cells
P1_CTGCCTATCTGGTATG.1	P1	13000	3054	0.0420769	0	15	Endothelial cells
P1_CTGCCTATCTTCGGTC.1	P1	9793.5	2111	0.0561597	0	0	Epithelial cells
P1_CTGCGGAAGACTACAA.1	P1	12577.5	2775	0.0654343	0	0	Epithelial cells
P1_CTGCGGAAGAGGGCTT.1	P1	7341.5	1821	0.0284683	0	6	Epithelial cells
P1_CTGCGGAAGAGGTAGA.1	P1	26278	3504	0.0881346	3.80546e-05	6	Epithelial cells
P1_CTGCGGACAACACCCG.1	P1	9704	1988	0.0424567	0	12	Epithelial cells
P1_CTGCGGACACTTACGA.1	P1	12102	2126	0.0483391	0	0	Epithelial cells
P1_CTGCGGACAGCTGTGC.1	P1	13242	2534	0.0604894	0	23	B-cells
P1_CTGCGGAGTCTAACGT.1	P1	36978	4069	0.0521121	0	0	Epithelial cells
P1_CTGCGGATCCTCCTAG.1	P1	18493	3323	0.026875	0	9	Epithelial cells
P1_CTGCGGATCGTTACGA.1	P1	11139.5	2266	0.0777414	0	4	CD8+ T-cells
P1_CTGCTGTAGCCCGAAA.1	P1	19576	2800	0.0593073	0	4	CD8+ T-cells
P1_CTGCTGTAGTACGTAA.1	P1	10338	2114	0.0522345	0	3	CD8+ T-cells
P1_CTGCTGTCATGAGCGA.1	P1	8006	1751	0.0604547	0.000124906	4	CD8+ T-cells
P1_CTGCTGTGTTACAGAA.1	P1	12487	2217	0.0411628	0	0	Epithelial cells
P1_CTGCTGTTCACTTCAT.1	P1	16252.5	3510	0.0320566	6.1529e-05	13	Epithelial cells
P1_CTGGTCTAGATCCTGT.1	P1	13623	2358	0.0160023	0	24	B-cells
P1_CTGGTCTCAGCCTTTC.1	P1	9692.5	2496	0.037658	0	11	Epithelial cells
P1_CTGGTCTCAGGGATTG.1	P1	10675.5	2630	0.081214	0.000187345	4	CD8+ T-cells
P1_CTGGTCTCAGTAGAGC.1	P1	9605.5	2055	0.0736037	0	3	CD8+ T-cells
P1_CTGGTCTCATATACCG.1	P1	11465	2945	0.0287833	0	6	Epithelial cells
P1_CTGGTCTGTGGCGAAT.1	P1	18683	2716	0.0475834	0	24	B-cells
P1_CTGGTCTTCCGCAAGC.1	P1	17530	3399	0.0462065	5.70451e-05	8	Monocytes
P1_CTGGTCTTCTTCTGGC.1	P1	9910	2123	0.0408678	0.0370333	12	Epithelial cells
P1_CTGTGCTAGGACTGGT.1	P1	14406	2816	0.0690684	6.94155e-05	8	Monocytes
P1_CTGTGCTCAACTGGCC.1	P1	8951.5	2239	0.0532872	0	5	Myofibroblasts
P1_CTGTGCTCACTCGACG.1	P1	11620	2283	0.0569707	0.000172117	3	CD8+ T-cells
P1_CTGTGCTCAGGGTTAG.1	P1	11041	2149	0.0655738	0	4	CD8+ T-cells
P1_CTGTGCTCAGTCCTTC.1	P1	10994	2634	0.0457522	9.09587e-05	6	Epithelial cells
P1_CTGTGCTGTATTACCG.1	P1	14965.5	2422	0.045371	0	0	Epithelial cells
P1_CTGTGCTGTCATCGGC.1	P1	8010	1920	0.0478152	0	24	B-cells
P1_CTGTGCTGTTTCGCTC.1	P1	16837	3270	0.0404466	0	6	Epithelial cells
P1_CTGTGCTTCTACTCAT.1	P1	6995	2196	0.0395997	0	2	Fibroblasts
P1_CTGTGCTTCTGCGGCA.1	P1	17596.5	3432	0.0600688	5.68295e-05	0	Epithelial cells
P1_CTGTTTAAGAATTGTG.1	P1	8753	2580	0.0380441	0	32	Macrophages
P1_CTGTTTAAGGCTAGGT.1	P1	13618	2497	0.0944338	0	6	Epithelial cells
P1_CTGTTTAAGTTTAGGA.1	P1	7885	1998	0.0328472	0	9	Epithelial cells
P1_CTGTTTATCCAAAGTC.1	P1	8090	2074	0.0315204	0.000370828	6	Epithelial cells
P1_CTTAACTAGAAAGTGG.1	P1	6950	859	0.0145324	0.0309353	23	B-cells
P1_CTTAACTAGGGATACC.1	P1	11373	2265	0.0677921	0	24	B-cells
P1_CTTAACTCAAGCGTAG.1	P1	13591	2327	0.0486351	7.35781e-05	0	Epithelial cells
P1_CTTAACTCAAGTACCT.1	P1	18889.5	2857	0.0492866	0	0	Epithelial cells
P1_CTTAACTCACATCCAA.1	P1	20827.5	4073	0.0598728	0	9	Epithelial cells
P1_CTTAACTGTACCGTTA.1	P1	8690	1930	0.0445339	0	1	Epithelial cells
P1_CTTAACTTCTACTCAT.1	P1	21989	3415	0.0545727	0	12	Epithelial cells
P1_CTTACCGCACCGAAAG.1	P1	16162	3246	0.0407128	0	10	Epithelial cells
P1_CTTACCGCATTTGCTT.1	P1	8326	1569	0.0456402	0	12	Epithelial cells
P1_CTTACCGGTTCCATGA.1	P1	16304	2929	0.0693695	0	9	Epithelial cells
P1_CTTACCGTCAATAAGG.1	P1	8385.5	2143	0.0589112	0	0	Epithelial cells
P1_CTTACCGTCAGTCCCT.1	P1	6931	1893	0.0549704	0	0	Epithelial cells
P1_CTTACCGTCCTCAATT.1	P1	8207	1876	0.0308273	0	21	Macrophages
P1_CTTACCGTCCTTTCTC.1	P1	7121.5	2177	0.0338412	0.00014042	5	Myofibroblasts
P1_CTTACCGTCGGCGCAT.1	P1	19188	3802	0.0515426	0	19	Epithelial cells
P1_CTTACCGTCTTTACGT.1	P1	12097.5	2683	0.0540608	0	0	Epithelial cells
P1_CTTAGGAAGGGTTTCT.1	P1	14348	2387	0.0588235	0	4	CD8+ T-cells
P1_CTTAGGACACCGCTAG.1	P1	26155	3718	0.0235137	0	1	Epithelial cells
P1_CTTAGGACAGGACCCT.1	P1	13303.5	2271	0.04247	0	23	B-cells
P1_CTTAGGACATATGCTG.1	P1	32106	4403	0.0256961	3.11468e-05	13	Epithelial cells
P1_CTTAGGATCCAAACTG.1	P1	11642.5	2250	0.0462959	0	8	Monocytes
P1_CTTAGGATCGGGAGTA.1	P1	6684	1852	0.05386	0	32	Macrophages
P1_CTTCTCTAGCTAGCCC.1	P1	7645	1791	0.0351864	0.000130804	12	Epithelial cells
P1_CTTCTCTAGTAGCGGT.1	P1	10298	2392	0.0497184	9.71062e-05	9	Epithelial cells
P1_CTTCTCTCAACAACCT.1	P1	16929.5	3726	0.0849996	0	8	Monocytes
P1_CTTCTCTCAATTCCTT.1	P1	10013.5	2564	0.0343536	0	10	Epithelial cells
P1_CTTCTCTCACTCGACG.1	P1	13206	3079	0.0268817	0	13	Epithelial cells
P1_CTTCTCTGTAATCACC.1	P1	8215	2086	0.0287279	0	17	Endothelial cells
P1_CTTCTCTGTATGCTTG.1	P1	8849	2178	0.0579727	0	22	Epithelial cells
P1_CTTCTCTGTCCATCCT.1	P1	6783	1982	0.0572018	0	6	Epithelial cells
P1_CTTCTCTGTCCGTTAA.1	P1	9508.5	2443	0.0568965	0	8	Macrophages
P1_CTTCTCTGTCTAAAGA.1	P1	22417.5	4127	0.022527	0	20	Epithelial cells
P1_CTTCTCTTCTGGTATG.1	P1	6644.5	1825	0.0382271	0	2	Fibroblasts
[truncated: 20,796 more rows]

## Sheet: Marker_table
gene	p_val	avg_log2FC	pct.1	pct.2	p_val_adj	cluster
APOD	0	5.92614	0.751	0.257	0	Fibroblasts
COL1A1	0	4.35103	0.889	0.151	0	Fibroblasts
MGP	0	4.22402	0.968	0.56	0	Fibroblasts
DCN	0	4.18192	0.904	0.108	0	Fibroblasts
TIMP1	0	4.16967	0.984	0.551	0	Fibroblasts
COL1A2	0	3.97911	0.932	0.131	0	Fibroblasts
CXCL14	0	3.96718	0.51	0.05	0	Fibroblasts
LUM	0	3.7918	0.866	0.081	0	Fibroblasts
IGFBP6	0	3.63657	0.825	0.121	0	Fibroblasts
COL3A1	0	3.59816	0.852	0.109	0	Fibroblasts
IGFBP5	0	3.5564	0.819	0.146	0	Fibroblasts
IGFBP7	0	3.34894	0.975	0.429	0	Fibroblasts
SFRP4	0	3.17448	0.615	0.038	0	Fibroblasts
GSN	0	3.11947	0.913	0.368	0	Fibroblasts
SFRP2	0	3.0898	0.538	0.031	0	Fibroblasts
FBLN1	0	3.04626	0.773	0.18	0	Fibroblasts
RARRES2	0	3.0248	0.885	0.159	0	Fibroblasts
BGN	0	3.00522	0.873	0.164	0	Fibroblasts
LGALS1	0	2.75456	0.986	0.604	0	Fibroblasts
CTGF	0	2.58876	0.708	0.126	0	Fibroblasts
SERPINF1	0	2.50984	0.753	0.119	0	Fibroblasts
SPARC	0	2.44518	0.887	0.204	0	Fibroblasts
C1S	0	2.44479	0.858	0.087	0	Fibroblasts
CTHRC1	0	2.38616	0.687	0.117	0	Fibroblasts
C1R	0	2.37543	0.844	0.125	0	Fibroblasts
FN1	0	2.35553	0.804	0.229	0	Fibroblasts
CCDC80	0	2.348	0.666	0.078	0	Fibroblasts
COL6A2	0	2.32773	0.87	0.168	0	Fibroblasts
IGFBP4	0	2.28721	0.896	0.213	0	Fibroblasts
AEBP1	0	2.23936	0.768	0.092	0	Fibroblasts
POSTN	0	2.22278	0.471	0.039	0	Fibroblasts
PTN	0	2.20186	0.549	0.049	0	Fibroblasts
COL6A3	0	2.12434	0.714	0.049	0	Fibroblasts
PCOLCE	0	2.09175	0.78	0.119	0	Fibroblasts
COMP	0	2.08746	0.319	0.021	0	Fibroblasts
CALD1	0	2.01907	0.943	0.485	0	Fibroblasts
FSTL1	0	2.0115	0.778	0.144	0	Fibroblasts
VCAN	0	1.99155	0.695	0.049	0	Fibroblasts
PLAC9	0	1.98099	0.72	0.121	0	Fibroblasts
SERPING1	0	1.97398	0.879	0.207	0	Fibroblasts
ISLR	0	1.96305	0.675	0.031	0	Fibroblasts
LTBP4	0	1.9525	0.751	0.132	0	Fibroblasts
COL8A1	0	1.87186	0.662	0.03	0	Fibroblasts
NNMT	0	1.85427	0.784	0.157	0	Fibroblasts
INHBA	0	1.83945	0.593	0.071	0	Fibroblasts
GEM	0	1.83589	0.621	0.152	0	Fibroblasts
SELENOM	0	1.82896	0.768	0.293	0	Fibroblasts
IFITM3	0	1.81414	0.977	0.556	0	Fibroblasts
MFAP4	0	1.80879	0.606	0.061	0	Fibroblasts
CTSK	0	1.80006	0.697	0.048	0	Fibroblasts
COL6A1	0	1.79275	0.741	0.146	0	Fibroblasts
SULF1	0	1.78433	0.597	0.059	0	Fibroblasts
CST3	0	1.77374	0.991	0.813	0	Fibroblasts
CRYAB	0	1.73776	0.64	0.175	0	Fibroblasts
MXRA8	0	1.73382	0.736	0.073	0	Fibroblasts
THY1	0	1.69855	0.685	0.069	0	Fibroblasts
TIMP3	0	1.68501	0.602	0.186	0	Fibroblasts
TIMP2	0	1.68225	0.836	0.299	0	Fibroblasts
MFAP5	0	1.65008	0.3	0.015	0	Fibroblasts
C3	0	1.62775	0.352	0.082	0	Fibroblasts
TPM2	0	1.61934	0.833	0.196	0	Fibroblasts
MEG3	0	1.6019	0.644	0.065	0	Fibroblasts
SOD3	0	1.6017	0.67	0.124	0	Fibroblasts
PRELP	0	1.57961	0.537	0.035	0	Fibroblasts
TAGLN	0	1.56642	0.816	0.222	0	Fibroblasts
THBS2	0	1.55016	0.544	0.027	0	Fibroblasts
THBS4	0	1.54541	0.27	0.025	0	Fibroblasts
NR2F1	0	1.52258	0.571	0.067	0	Fibroblasts
LRP1	0	1.49193	0.697	0.11	0	Fibroblasts
MMP2	0	1.47636	0.519	0.07	0	Fibroblasts
CYGB	0	1.47159	0.591	0.044	0	Fibroblasts
DIO2	0	1.46939	0.462	0.045	0	Fibroblasts
AGT	0	1.46515	0.357	0.055	0	Fibroblasts
C11orf96	0	1.43426	0.711	0.267	0	Fibroblasts
COX7A1	0	1.40004	0.741	0.124	0	Fibroblasts
PRRX1	0	1.38213	0.637	0.049	0	Fibroblasts
VIM	0	1.37911	0.989	0.567	0	Fibroblasts
COL5A1	0	1.37797	0.545	0.038	0	Fibroblasts
SERPINE2	0	1.36994	0.507	0.054	0	Fibroblasts
PMP22	0	1.36815	0.674	0.149	0	Fibroblasts
MFGE8	0	1.36474	0.731	0.197	0	Fibroblasts
MYL9	0	1.34371	0.828	0.237	0	Fibroblasts
HCFC1R1	0	1.33229	0.767	0.438	0	Fibroblasts
EFEMP2	0	1.32998	0.669	0.102	0	Fibroblasts
LGALS3BP	0	1.31883	0.766	0.282	0	Fibroblasts
EFEMP1	0	1.31232	0.432	0.033	0	Fibroblasts
SERPINH1	0	1.31119	0.753	0.359	0	Fibroblasts
GGT5	0	1.30385	0.518	0.057	0	Fibroblasts
ITM2B	0	1.30073	0.965	0.8	0	Fibroblasts
FXYD1	0	1.29793	0.456	0.105	0	Fibroblasts
DKK3	0	1.28383	0.614	0.069	0	Fibroblasts
CD99	0	1.2813	0.918	0.696	0	Fibroblasts
CD63	0	1.27815	0.984	0.893	0	Fibroblasts
ASPN	0	1.26876	0.434	0.027	0	Fibroblasts
COL14A1	0	1.26522	0.364	0.041	0	Fibroblasts
PPIC	0	1.25363	0.663	0.226	0	Fibroblasts
HTRA3	0	1.25084	0.416	0.022	0	Fibroblasts
FHL2	0	1.24789	0.583	0.158	0	Fibroblasts
COL5A2	0	1.22656	0.536	0.051	0	Fibroblasts
ITGBL1	0	1.21619	0.343	0.007	0	Fibroblasts
TGFBI	0	1.20511	0.509	0.098	0	Fibroblasts
CAVIN3	0	1.20437	0.612	0.096	0	Fibroblasts
F2R	0	1.20278	0.45	0.074	0	Fibroblasts
CFH	0	1.20075	0.421	0.058	0	Fibroblasts
SSPN	0	1.19439	0.576	0.078	0	Fibroblasts
FBN1	0	1.19361	0.483	0.052	0	Fibroblasts
LTBP2	0	1.18461	0.498	0.034	0	Fibroblasts
CYR61	0	1.17215	0.564	0.199	0	Fibroblasts
ANXA5	0	1.17202	0.844	0.501	0	Fibroblasts
COL4A2	0	1.17029	0.644	0.134	0	Fibroblasts
S100A13	0	1.15336	0.824	0.479	0	Fibroblasts
S100A6	0	1.14441	0.989	0.738	0	Fibroblasts
CDH11	0	1.13473	0.523	0.031	0	Fibroblasts
PDLIM7	0	1.13468	0.624	0.194	0	Fibroblasts
CYBRD1	0	1.13333	0.578	0.117	0	Fibroblasts
C2orf40	0	1.12581	0.288	0.042	0	Fibroblasts
OLFML3	0	1.10595	0.505	0.041	0	Fibroblasts
CNN3	0	1.10519	0.743	0.33	0	Fibroblasts
ELN	0	1.10463	0.479	0.05	0	Fibroblasts
PALLD	0	1.09884	0.579	0.157	0	Fibroblasts
EMILIN1	0	1.09181	0.483	0.031	0	Fibroblasts
ANXA2	0	1.08409	0.878	0.485	0	Fibroblasts
PDLIM2	0	1.07908	0.741	0.377	0	Fibroblasts
PDGFRB	0	1.05245	0.576	0.061	0	Fibroblasts
CTSC	0	1.04743	0.543	0.176	0	Fibroblasts
LGALS3	0	1.03258	0.835	0.377	0	Fibroblasts
PDLIM3	0	1.02983	0.489	0.071	0	Fibroblasts
MRC2	0	1.02106	0.497	0.041	0	Fibroblasts
TSPAN4	0	1.0196	0.59	0.201	0	Fibroblasts
RAB34	0	1.00963	0.675	0.242	0	Fibroblasts
AKAP12	0	1.0082	0.523	0.123	0	Fibroblasts
PDLIM4	0	1.00375	0.56	0.185	0	Fibroblasts
TPM4	0	0.995914	0.821	0.469	0	Fibroblasts
EMP1	0	0.995825	0.638	0.166	0	Fibroblasts
EMP3	0	0.994501	0.734	0.325	0	Fibroblasts
GAS6	0	0.989453	0.553	0.2	0	Fibroblasts
CAVIN1	0	0.984488	0.611	0.157	0	Fibroblasts
ACTA2	0	0.981568	0.599	0.147	0	Fibroblasts
RCN3	0	0.973736	0.468	0.043	0	Fibroblasts
COL10A1	0	0.973651	0.309	0.005	0	Fibroblasts
FBLN2	0	0.962323	0.373	0.05	0	Fibroblasts
CST2	0	0.959681	0.27	0.007	0	Fibroblasts
TSHZ2	0	0.958771	0.565	0.184	0	Fibroblasts
RARRES1	0	0.958558	0.508	0.156	0	Fibroblasts
COL4A1	0	0.943507	0.549	0.119	0	Fibroblasts
MMP14	0	0.925938	0.446	0.095	0	Fibroblasts
HTRA1	0	0.922196	0.526	0.11	0	Fibroblasts
COL12A1	0	0.911261	0.382	0.033	0	Fibroblasts
FILIP1L	0	0.907066	0.518	0.112	0	Fibroblasts
INAFM1	0	0.895095	0.563	0.204	0	Fibroblasts
FMOD	0	0.894527	0.449	0.041	0	Fibroblasts
MMP23B	0	0.889008	0.311	0.031	0	Fibroblasts
FBLN5	0	0.88617	0.412	0.027	0	Fibroblasts
CRISPLD2	0	0.88265	0.442	0.078	0	Fibroblasts
ANTXR1	0	0.882124	0.458	0.104	0	Fibroblasts
SDC2	0	0.881172	0.586	0.227	0	Fibroblasts
CYP1B1	0	0.876928	0.498	0.117	0	Fibroblasts
TCF4	0	0.862203	0.645	0.25	0	Fibroblasts
COL16A1	0	0.84936	0.402	0.067	0	Fibroblasts
OAF	0	0.834965	0.435	0.101	0	Fibroblasts
MXRA5	0	0.834223	0.417	0.021	0	Fibroblasts
WWTR1	0	0.832235	0.516	0.166	0	Fibroblasts
FRZB	0	0.826367	0.388	0.055	0	Fibroblasts
GPX8	0	0.813621	0.424	0.043	0	Fibroblasts
IL32	0	0.812112	0.724	0.311	0	Fibroblasts
RRAS	0	0.807336	0.515	0.169	0	Fibroblasts
SPARCL1	0	0.798778	0.665	0.172	0	Fibroblasts
CERCAM	0	0.784222	0.424	0.072	0	Fibroblasts
ABCA8	0	0.782738	0.288	0.01	0	Fibroblasts
PLXDC2	0	0.782366	0.436	0.079	0	Fibroblasts
FAP	0	0.781394	0.393	0.018	0	Fibroblasts
LHFPL6	0	0.763906	0.394	0.098	0	Fibroblasts
TCF21	0	0.76375	0.338	0.012	0	Fibroblasts
LAMA4	0	0.763328	0.475	0.08	0	Fibroblasts
MFAP2	0	0.763015	0.396	0.103	0	Fibroblasts
LTBP1	0	0.75688	0.459	0.128	0	Fibroblasts
RAB31	0	0.749027	0.47	0.123	0	Fibroblasts
HSPB6	0	0.738401	0.341	0.064	0	Fibroblasts
A2M	0	0.736287	0.636	0.206	0	Fibroblasts
PODN	0	0.736016	0.361	0.013	0	Fibroblasts
WNT2	0	0.722766	0.308	0.008	0	Fibroblasts
ENG	0	0.71998	0.476	0.12	0	Fibroblasts
MIR99AHG	0	0.717263	0.443	0.13	0	Fibroblasts
VAMP5	0	0.714822	0.692	0.266	0	Fibroblasts
PDGFRL	0	0.712074	0.254	0.014	0	Fibroblasts
GNG11	0	0.711408	0.63	0.141	0	Fibroblasts
TMEM119	0	0.711248	0.276	0.009	0	Fibroblasts
AXL	0	0.70388	0.402	0.074	0	Fibroblasts
FIBIN	0	0.696656	0.273	0.017	0	Fibroblasts
CXCL12	0	0.691017	0.288	0.047	0	Fibroblasts
TGFB1I1	0	0.689785	0.458	0.093	0	Fibroblasts
TNFAIP6	0	0.689632	0.297	0.017	0	Fibroblasts
OLFML2B	0	0.68301	0.284	0.034	0	Fibroblasts
DDR2	0	0.665686	0.385	0.038	0	Fibroblasts
EPB41L2	0	0.660912	0.436	0.122	0	Fibroblasts
GPNMB	0	0.659371	0.408	0.074	0	Fibroblasts
MATN2	0	0.658701	0.307	0.045	0	Fibroblasts
INMT	0	0.628502	0.274	0.021	0	Fibroblasts
COL15A1	0	0.627706	0.337	0.054	0	Fibroblasts
PDPN	0	0.620932	0.298	0.019	0	Fibroblasts
CD248	0	0.612349	0.286	0.022	0	Fibroblasts
PDGFRA	0	0.606325	0.3	0.01	0	Fibroblasts
ECM1	0	0.603961	0.332	0.044	0	Fibroblasts
MAP1A	0	0.599912	0.372	0.078	0	Fibroblasts
DAB2	0	0.591018	0.432	0.102	0	Fibroblasts
ZEB1	0	0.578407	0.37	0.07	0	Fibroblasts
BOC	0	0.578294	0.275	0.022	0	Fibroblasts
PRRX2	0	0.56983	0.329	0.034	0	Fibroblasts
GLT8D2	0	0.565104	0.323	0.017	0	Fibroblasts
BICC1	0	0.565079	0.32	0.039	0	Fibroblasts
C1QTNF4	0	0.558331	0.267	0.016	0	Fibroblasts
TMEM204	0	0.557733	0.344	0.054	0	Fibroblasts
SRPX2	0	0.554985	0.271	0.007	0	Fibroblasts
ZCCHC24	0	0.553562	0.333	0.039	0	Fibroblasts
TCEAL7	0	0.551178	0.255	0.022	0	Fibroblasts
NEXN	0	0.549997	0.297	0.035	0	Fibroblasts
BHLHE41	0	0.544017	0.307	0.061	0	Fibroblasts
HIC1	0	0.525686	0.297	0.041	0	Fibroblasts
MSC	0	0.525	0.291	0.027	0	Fibroblasts
MOXD1	0	0.520273	0.264	0.031	0	Fibroblasts
SGIP1	0	0.516098	0.287	0.029	0	Fibroblasts
NR2F1-AS1	0	0.515052	0.292	0.028	0	Fibroblasts
SNAI2	0	0.513496	0.284	0.053	0	Fibroblasts
ADGRA2	0	0.512007	0.322	0.043	0	Fibroblasts
PLXDC1	0	0.503435	0.285	0.049	0	Fibroblasts
LAMB2	3.39676e-305	0.681036	0.451	0.137	1.02154e-300	Fibroblasts
MXRA7	7.68876e-305	0.909623	0.584	0.252	2.31232e-300	Fibroblasts
UACA	7.00079e-304	0.688362	0.411	0.117	2.10542e-299	Fibroblasts
KANK2	1.31769e-303	0.603753	0.427	0.127	3.96283e-299	Fibroblasts
CPQ	1.68835e-300	0.689352	0.451	0.142	5.07755e-296	Fibroblasts
CSRP1	6.75358e-300	1.02839	0.649	0.318	2.03107e-295	Fibroblasts
TFPI	7.40047e-297	0.52155	0.328	0.073	2.22562e-292	Fibroblasts
TCEAL9	1.50125e-295	1.01039	0.625	0.286	4.51487e-291	Fibroblasts
COPZ2	8.641e-295	0.679371	0.385	0.107	2.5987e-290	Fibroblasts
MT2A	9.16585e-295	1.28786	0.944	0.772	2.75654e-290	Fibroblasts
PPP1R14A	3.72714e-292	0.634901	0.357	0.084	1.1209e-287	Fibroblasts
NBL1	2.85762e-291	1.0573	0.724	0.363	8.59401e-287	Fibroblasts
PLTP	8.5403e-290	0.690214	0.415	0.122	2.56841e-285	Fibroblasts
CYTOR	2.06929e-288	0.831908	0.562	0.201	6.22319e-284	Fibroblasts
PHLDB1	8.94267e-287	0.62364	0.379	0.107	2.68942e-282	Fibroblasts
PHLDA3	2.25592e-286	0.907539	0.491	0.185	6.78444e-282	Fibroblasts
MYLK	7.24487e-286	0.522653	0.372	0.095	2.17882e-281	Fibroblasts
DPYSL3	3.87483e-285	0.593067	0.468	0.145	1.16532e-280	Fibroblasts
CST1	3.45635e-283	2.82548	0.372	0.105	1.03946e-278	Fibroblasts
IFITM2	1.75587e-280	0.758917	0.888	0.492	5.2806e-276	Fibroblasts
IFI16	4.5362e-280	0.614625	0.52	0.173	1.36422e-275	Fibroblasts
C12orf57	5.34325e-280	0.773594	0.929	0.842	1.60693e-275	Fibroblasts
CLDN11	1.84368e-279	0.564301	0.29	0.064	5.5447e-275	Fibroblasts
MTRNR2L8	2.73416e-279	1.26856	0.77	0.499	8.22271e-275	Fibroblasts
ITGB1	2.32723e-277	0.915136	0.806	0.574	6.9989e-273	Fibroblasts
LOXL1	3.17317e-277	0.621115	0.351	0.095	9.54298e-273	Fibroblasts
IFI27L2	4.32089e-276	0.812127	0.739	0.398	1.29946e-271	Fibroblasts
CD59	1.88272e-275	0.876887	0.788	0.472	5.66208e-271	Fibroblasts
MT1E	2.69285e-275	0.925285	0.687	0.304	8.09849e-271	Fibroblasts
CCND2	5.88133e-273	0.506959	0.403	0.112	1.76875e-268	Fibroblasts
SERPINE1	8.05535e-272	0.712412	0.332	0.082	2.42257e-267	Fibroblasts
THBS1	9.61074e-271	0.816061	0.459	0.154	2.89033e-266	Fibroblasts
TUBB6	3.91974e-268	0.552784	0.414	0.127	1.17882e-263	Fibroblasts
SPHK1	2.9817e-267	0.584383	0.373	0.105	8.96718e-263	Fibroblasts
SMIM3	7.37684e-267	0.6229	0.415	0.13	2.21851e-262	Fibroblasts
FSTL3	1.28103e-266	0.792941	0.376	0.112	3.85257e-262	Fibroblasts
FGFR1	2.45855e-264	0.75559	0.538	0.227	7.39385e-260	Fibroblasts
REX1BD	1.85822e-262	0.714216	0.578	0.226	5.58841e-258	Fibroblasts
LAPTM4A	7.13571e-262	0.897597	0.87	0.656	2.14599e-257	Fibroblasts
SPATS2L	1.58314e-260	0.866137	0.718	0.413	4.76112e-256	Fibroblasts
NUPR1	3.72433e-260	0.8212	0.875	0.566	1.12006e-255	Fibroblasts
SYNE1	4.45262e-257	0.532303	0.303	0.072	1.33908e-252	Fibroblasts
FXYD6	7.42606e-257	0.652813	0.438	0.143	2.23331e-252	Fibroblasts
EID1	7.61373e-256	0.799619	0.87	0.71	2.28975e-251	Fibroblasts
GYPC	6.09889e-254	0.572522	0.554	0.205	1.83418e-249	Fibroblasts
SEMA3C	3.82159e-253	0.688827	0.29	0.07	1.1493e-248	Fibroblasts
RPS27L	5.01196e-253	0.912215	0.902	0.795	1.5073e-248	Fibroblasts
FLNA	4.67866e-252	0.828725	0.687	0.378	1.40706e-247	Fibroblasts
FAM114A1	6.62059e-249	0.642609	0.468	0.183	1.99108e-244	Fibroblasts
TMEM176B	5.11937e-248	0.904331	0.503	0.195	1.5396e-243	Fibroblasts
SFRP1	7.00746e-248	1.3408	0.261	0.059	2.10742e-243	Fibroblasts
SPTBN1	2.4389e-233	0.771945	0.646	0.35	7.33476e-229	Fibroblasts
CALU	1.43082e-231	0.803251	0.63	0.363	4.30305e-227	Fibroblasts
FHL1	3.30001e-230	0.61033	0.405	0.128	9.92444e-226	Fibroblasts
TMEM98	1.54381e-229	0.783307	0.605	0.333	4.64285e-225	Fibroblasts
CLIC4	2.18881e-229	0.638396	0.504	0.211	6.58263e-225	Fibroblasts
CCL2	8.51391e-227	1.73037	0.601	0.297	2.56047e-222	Fibroblasts
RND3	9.09335e-225	0.866779	0.567	0.272	2.73473e-220	Fibroblasts
CDC42EP5	2.01636e-224	0.511565	0.328	0.092	6.06401e-220	Fibroblasts
PARVA	3.2899e-224	0.553787	0.392	0.138	9.89403e-220	Fibroblasts
SEPT11	5.50513e-222	0.826964	0.539	0.253	1.65561e-217	Fibroblasts
TAX1BP3	1.43235e-220	0.774056	0.595	0.318	4.30766e-216	Fibroblasts
DNAJC15	4.23755e-220	0.554862	0.514	0.206	1.2744e-215	Fibroblasts
CYB5R3	1.21148e-219	0.758506	0.716	0.476	3.64341e-215	Fibroblasts
TGFB1	9.41583e-219	0.633486	0.502	0.195	2.83172e-214	Fibroblasts
SH3BGRL	6.31659e-218	0.606039	0.668	0.321	1.89965e-213	Fibroblasts
PROCR	1.76041e-217	0.506182	0.286	0.074	5.29424e-213	Fibroblasts
COL18A1	1.05037e-214	0.593346	0.562	0.246	3.15888e-210	Fibroblasts
LMNA	3.70092e-213	0.632276	0.892	0.656	1.11302e-208	Fibroblasts
PKIG	5.7817e-213	0.770216	0.576	0.3	1.73879e-208	Fibroblasts
RTL8C	6.41485e-213	0.65323	0.464	0.194	1.9292e-208	Fibroblasts
AHNAK	2.8547e-211	0.785376	0.666	0.356	8.58524e-207	Fibroblasts
RABAC1	4.35065e-205	0.711228	0.885	0.73	1.30841e-200	Fibroblasts
NDN	5.14563e-205	0.543898	0.355	0.12	1.5475e-200	Fibroblasts
HSPA1A	3.96622e-204	0.872326	0.948	0.77	1.1928e-199	Fibroblasts
TPM1	1.63439e-203	1.16316	0.797	0.631	4.91528e-199	Fibroblasts
CRTAP	5.9189e-198	0.672748	0.582	0.319	1.78005e-193	Fibroblasts
LXN	2.76108e-197	0.70725	0.39	0.144	8.30367e-193	Fibroblasts
SH3PXD2A	5.35278e-196	0.533969	0.344	0.118	1.6098e-191	Fibroblasts
UNC5B	6.23586e-196	0.518158	0.34	0.112	1.87537e-191	Fibroblasts
S100A11	2.39089e-193	0.591262	0.955	0.709	7.19036e-189	Fibroblasts
IGF1	3.35594e-189	0.879318	0.306	0.093	1.00926e-184	Fibroblasts
TPT1	4.40833e-189	0.525727	0.998	0.998	1.32576e-184	Fibroblasts
PLAT	6.82641e-188	0.60558	0.385	0.137	2.05298e-183	Fibroblasts
YBX3	7.81335e-188	0.649452	0.703	0.419	2.34979e-183	Fibroblasts
FKBP10	2.37244e-186	0.619468	0.46	0.211	7.13487e-182	Fibroblasts
PAM	1.13533e-185	0.509142	0.388	0.144	3.4144e-181	Fibroblasts
NPC2	3.22894e-181	0.611177	0.844	0.667	9.71073e-177	Fibroblasts
TMSB10	1.24387e-174	0.545959	0.999	0.997	3.74081e-170	Fibroblasts
HSPB1	1.01299e-173	0.759069	0.98	0.947	3.04646e-169	Fibroblasts
PLD3	6.18539e-171	0.636954	0.672	0.446	1.86019e-166	Fibroblasts
ALDH1A3	1.08968e-165	0.525135	0.304	0.104	3.27709e-161	Fibroblasts
CLEC11A	6.61001e-165	0.894865	0.637	0.415	1.9879e-160	Fibroblasts
VKORC1	9.7072e-165	0.674599	0.777	0.614	2.91934e-160	Fibroblasts
ID4	1.07579e-164	0.607506	0.38	0.151	3.23534e-160	Fibroblasts
MTRNR2L12	2.2792e-164	0.942398	0.79	0.63	6.85446e-160	Fibroblasts
SELENOF	3.28877e-162	0.604194	0.518	0.261	9.89064e-158	Fibroblasts
TCIM	3.43319e-156	0.542322	0.281	0.09	1.0325e-151	Fibroblasts
NR2F2	1.21314e-155	0.728434	0.589	0.335	3.6484e-151	Fibroblasts
SVIL	1.23426e-154	0.578696	0.423	0.197	3.7119e-150	Fibroblasts
ILK	3.05888e-154	0.576678	0.509	0.273	9.19928e-150	Fibroblasts
ACTN1	4.19356e-154	0.649292	0.519	0.284	1.26117e-149	Fibroblasts
HOPX	2.02171e-153	0.815474	0.344	0.135	6.0801e-149	Fibroblasts
ABL2	5.24145e-152	0.684792	0.487	0.255	1.57631e-147	Fibroblasts
NFIA	5.07798e-150	0.630608	0.499	0.258	1.52715e-145	Fibroblasts
RHOC	4.52086e-148	0.618264	0.756	0.552	1.3596e-143	Fibroblasts
RRBP1	1.08831e-147	0.673413	0.615	0.401	3.27299e-143	Fibroblasts
RHOA	4.01484e-147	0.575293	0.865	0.763	1.20742e-142	Fibroblasts
SPOCK1	4.06836e-146	0.648008	0.398	0.181	1.22352e-141	Fibroblasts
C6orf48	2.44463e-145	0.666023	0.796	0.674	7.35198e-141	Fibroblasts
MORF4L1	3.31452e-142	0.581824	0.838	0.728	9.96809e-138	Fibroblasts
TNFRSF12A	4.41003e-142	0.781196	0.585	0.361	1.32627e-137	Fibroblasts
DNAJB4	2.07994e-140	0.6029	0.484	0.245	6.2552e-136	Fibroblasts
ATP6V0E1	4.20669e-137	0.556158	0.865	0.774	1.26512e-132	Fibroblasts
ARID5B	1.94332e-136	0.722148	0.715	0.53	5.84434e-132	Fibroblasts
LIMA1	2.09452e-136	0.656646	0.552	0.328	6.29906e-132	Fibroblasts
ZBTB20	1.11102e-134	0.680547	0.642	0.419	3.34128e-130	Fibroblasts
ZMAT3	1.50152e-134	0.517428	0.358	0.159	4.51566e-130	Fibroblasts
TAGLN2	1.15477e-133	0.534916	0.851	0.623	3.47286e-129	Fibroblasts
HDLBP	2.39639e-133	0.550093	0.608	0.401	7.20689e-129	Fibroblasts
ENC1	3.60772e-130	0.553428	0.352	0.156	1.08499e-125	Fibroblasts
CHPF	4.68331e-130	0.617223	0.435	0.234	1.40846e-125	Fibroblasts
ID3	3.1002e-128	0.531061	0.885	0.661	9.32353e-124	Fibroblasts
ZFP36L1	1.1011e-125	0.503101	0.801	0.549	3.31145e-121	Fibroblasts
C4orf3	7.70559e-123	0.569725	0.823	0.72	2.31738e-118	Fibroblasts
HSPA1B	3.06648e-118	0.737118	0.857	0.787	9.22212e-114	Fibroblasts
IGFBP3	4.34628e-118	0.599253	0.34	0.146	1.3071e-113	Fibroblasts
FOSB	3.92918e-117	0.705038	0.869	0.81	1.18166e-112	Fibroblasts
EGR1	3.95748e-115	0.796975	0.767	0.604	1.19017e-110	Fibroblasts
SQSTM1	2.12545e-114	0.54701	0.861	0.767	6.39207e-110	Fibroblasts
PHLDA1	1.66643e-113	0.70155	0.638	0.411	5.01163e-109	Fibroblasts
MYL12B	6.43038e-112	0.522954	0.9	0.848	1.93387e-107	Fibroblasts
SELENOW	4.92219e-111	0.529577	0.753	0.517	1.4803e-106	Fibroblasts
ARF4	1.36049e-106	0.553988	0.71	0.578	4.09153e-102	Fibroblasts
TUBA1A	4.87394e-106	0.619902	0.79	0.605	1.46579e-101	Fibroblasts
ESD	1.44288e-104	0.515162	0.574	0.393	4.33933e-100	Fibroblasts
ARL6IP5	1.87046e-104	0.509278	0.611	0.41	5.62523e-100	Fibroblasts
NFIC	1.438e-103	0.517425	0.683	0.507	4.32463e-99	Fibroblasts
ANKH	2.50135e-100	0.707368	0.519	0.347	7.52255e-96	Fibroblasts
PRSS23	4.44071e-97	0.731384	0.456	0.27	1.3355e-92	Fibroblasts
BST2	6.73018e-97	0.686093	0.558	0.344	2.02403e-92	Fibroblasts
APP	9.06796e-97	0.515478	0.665	0.507	2.7271e-92	Fibroblasts
NFIX	2.68496e-96	0.516914	0.46	0.279	8.07475e-92	Fibroblasts
CFD	4.15502e-96	2.88264	0.398	0.233	1.24958e-91	Fibroblasts
CYSTM1	1.68788e-95	0.5028	0.608	0.422	5.07613e-91	Fibroblasts
ARL2	8.04855e-95	0.52039	0.658	0.521	2.42052e-90	Fibroblasts
RNH1	6.0326e-90	0.520632	0.641	0.49	1.81424e-85	Fibroblasts
DHRS3	1.25825e-87	0.639461	0.385	0.211	3.78407e-83	Fibroblasts
MAGED2	5.23522e-85	0.555805	0.545	0.381	1.57444e-80	Fibroblasts
TSC22D1	3.25531e-81	0.508704	0.717	0.577	9.79003e-77	Fibroblasts
CEBPD	2.20493e-79	0.510557	0.67	0.513	6.63112e-75	Fibroblasts
NREP	2.9507e-79	0.516605	0.385	0.226	8.87394e-75	Fibroblasts
LMO4	6.62575e-72	0.517781	0.695	0.543	1.99263e-67	Fibroblasts
HSPA6	6.83667e-70	0.672968	0.495	0.325	2.05606e-65	Fibroblasts
NR4A1	1.55628e-69	0.733048	0.701	0.623	4.68035e-65	Fibroblasts
RAMP1	5.12173e-67	0.873712	0.54	0.408	1.54031e-62	Fibroblasts
VEGFB	1.56091e-66	0.531682	0.412	0.259	4.69428e-62	Fibroblasts
LTBP3	2.35087e-65	0.500698	0.527	0.383	7.06999e-61	Fibroblasts
CTSF	5.49405e-63	0.531679	0.445	0.317	1.65228e-58	Fibroblasts
CD81	2.74085e-43	0.641701	0.757	0.63	8.24283e-39	Fibroblasts
CXCL2	7.56851e-33	0.669937	0.431	0.326	2.27615e-28	Fibroblasts
FOS	2.71083e-27	0.569925	0.791	0.771	8.15254e-23	Fibroblasts
CLU	4.49955e-23	0.799959	0.509	0.427	1.3532e-18	Fibroblasts
S100A10	2.00506e-21	0.561007	0.768	0.734	6.03002e-17	Fibroblasts
KLK3	0	2.03064	0.6	0.196	0	Epithelial cells
KRT18	0	1.96766	0.964	0.316	0	Epithelial cells
TFF3	0	1.94646	0.618	0.288	0	Epithelial cells
CLDN4	0	1.85223	0.898	0.264	0	Epithelial cells
KRT8	0	1.82792	0.954	0.321	0	Epithelial cells
AR	0	1.76183	0.654	0.267	0	Epithelial cells
CKB	0	1.73781	0.743	0.272	0	Epithelial cells
KRT19	0	1.7182	0.477	0.184	0	Epithelial cells
AGR2	0	1.67302	0.344	0.065	0	Epithelial cells
ELF3	0	1.61334	0.882	0.217	0	Epithelial cells
SOX4	0	1.59803	0.917	0.499	0	Epithelial cells
KLK2	0	1.59233	0.529	0.158	0	Epithelial cells
CLDN3	0	1.51544	0.825	0.183	0	Epithelial cells
CD24	0	1.50812	0.794	0.224	0	Epithelial cells
FXYD3	0	1.49894	0.723	0.179	0	Epithelial cells
PCSK1N	0	1.49758	0.783	0.224	0	Epithelial cells
EPCAM	0	1.46028	0.861	0.182	0	Epithelial cells
PRAC1	0	1.41223	0.695	0.169	0	Epithelial cells
STMN1	0	1.41165	0.811	0.363	0	Epithelial cells
RORB	0	1.39288	0.361	0.108	0	Epithelial cells
TACSTD2	0	1.35785	0.446	0.161	0	Epithelial cells
WFDC2	0	1.35226	0.328	0.091	0	Epithelial cells
MDK	0	1.34115	0.926	0.477	0	Epithelial cells
GDF15	0	1.32023	0.544	0.139	0	Epithelial cells
CLDN7	0	1.28686	0.842	0.179	0	Epithelial cells
MARCKSL1	0	1.26693	0.962	0.497	0	Epithelial cells
PERP	0	1.25842	0.756	0.276	0	Epithelial cells
NGFRAP1	0	1.23942	0.446	0.171	0	Epithelial cells
SPINT2	0	1.21216	0.806	0.339	0	Epithelial cells
PDLIM5	0	1.20638	0.717	0.378	0	Epithelial cells
C19orf48	0	1.19938	0.801	0.277	0	Epithelial cells
UBE2S	0	1.18992	0.85	0.471	0	Epithelial cells
TMEM238	0	1.12732	0.449	0.106	0	Epithelial cells
PRDX2	0	1.12687	0.926	0.544	0	Epithelial cells
GNB2L1	0	1.1218	0.47	0.198	0	Epithelial cells
ATP5I	0	1.12075	0.466	0.193	0	Epithelial cells
TSPAN8	0	1.11728	0.495	0.113	0	Epithelial cells
FAM110B	0	1.11202	0.536	0.157	0	Epithelial cells
TSTD1	0	1.10473	0.952	0.414	0	Epithelial cells
ODC1	0	1.09721	0.827	0.446	0	Epithelial cells
TIMM13	0	1.08904	0.931	0.535	0	Epithelial cells
ATP5E	0	1.08001	0.469	0.198	0	Epithelial cells
PPDPF	0	1.06432	0.988	0.802	0	Epithelial cells
CAMK2N1	0	1.05633	0.646	0.251	0	Epithelial cells
SNHG19	0	1.05493	0.808	0.301	0	Epithelial cells
TMEFF2	0	1.04934	0.391	0.077	0	Epithelial cells
ACPP	0	1.03025	0.314	0.057	0	Epithelial cells
SHFM1	0	1.02786	0.457	0.183	0	Epithelial cells
SLC38A11	0	0.996242	0.481	0.123	0	Epithelial cells
SMS	0	0.989488	0.784	0.373	0	Epithelial cells
CDKN2A	0	0.98308	0.495	0.133	0	Epithelial cells
SFN	0	0.975047	0.339	0.087	0	Epithelial cells
SMIM22	0	0.972237	0.549	0.119	0	Epithelial cells
EEF1A2	0	0.968676	0.524	0.107	0	Epithelial cells
ANAPC11	0	0.963715	0.962	0.652	0	Epithelial cells
USMG5	0	0.95007	0.462	0.188	0	Epithelial cells
TSPAN13	0	0.948416	0.715	0.197	0	Epithelial cells
ATP5G2	0	0.941983	0.468	0.194	0	Epithelial cells
AC090498.1	0	0.937068	0.439	0.174	0	Epithelial cells
RPN2	0	0.936041	0.664	0.349	0	Epithelial cells
ATP5J2	0	0.935108	0.442	0.164	0	Epithelial cells
TCEB2	0	0.933027	0.468	0.193	0	Epithelial cells
NKX3-1	0	0.929896	0.48	0.115	0	Epithelial cells
MYO6	0	0.92809	0.564	0.163	0	Epithelial cells
MZT2A	0	0.921013	0.925	0.538	0	Epithelial cells
HEBP2	0	0.916269	0.89	0.38	0	Epithelial cells
SEZ6L2	0	0.908232	0.627	0.139	0	Epithelial cells
RAB25	0	0.904331	0.787	0.17	0	Epithelial cells
ATP1B1	0	0.899714	0.637	0.187	0	Epithelial cells
NDUFV3	0	0.885373	0.79	0.295	0	Epithelial cells
ACTG1	0	0.883635	0.998	0.945	0	Epithelial cells
SNRPE	0	0.877711	0.947	0.609	0	Epithelial cells
FOXA1	0	0.875702	0.628	0.119	0	Epithelial cells
PPP1R14B	0	0.875422	0.84	0.412	0	Epithelial cells
TM7SF2	0	0.850341	0.676	0.145	0	Epithelial cells
LSM7	0	0.847349	0.944	0.629	0	Epithelial cells
RPS5	0	0.845261	0.999	0.994	0	Epithelial cells
FOLH1	0	0.841462	0.4	0.084	0	Epithelial cells
PPP3CA	0	0.834119	0.565	0.264	0	Epithelial cells
MPC2	0	0.829202	0.891	0.479	0	Epithelial cells
MEST	0	0.827473	0.383	0.12	0	Epithelial cells
MZT2B	0	0.826422	0.953	0.645	0	Epithelial cells
CRABP2	0	0.82557	0.448	0.168	0	Epithelial cells
TBX3	0	0.822561	0.653	0.208	0	Epithelial cells
RPS2	0	0.822185	1	0.995	0	Epithelial cells
TRGC1	0	0.819059	0.31	0.08	0	Epithelial cells
EEF2	0	0.818934	0.989	0.934	0	Epithelial cells
ATP5L	0	0.817513	0.467	0.195	0	Epithelial cells
PEG10	0	0.813765	0.365	0.078	0	Epithelial cells
ZG16B	0	0.813511	0.493	0.091	0	Epithelial cells
PLPP2	0	0.812446	0.676	0.154	0	Epithelial cells
UBE2M	0	0.809119	0.708	0.279	0	Epithelial cells
HN1	0	0.809104	0.4	0.133	0	Epithelial cells
SNHG7	0	0.798919	0.892	0.433	0	Epithelial cells
GPM6A	0	0.798163	0.322	0.087	0	Epithelial cells
EGR4	0	0.792723	0.356	0.074	0	Epithelial cells
CUTA	0	0.790081	0.952	0.691	0	Epithelial cells
SRSF9	0	0.78697	0.872	0.439	0	Epithelial cells
PFN2	0	0.785473	0.646	0.212	0	Epithelial cells
H3F3A	0	0.781454	0.999	0.972	0	Epithelial cells
ATP5G3	0	0.780784	0.435	0.16	0	Epithelial cells
RPLP0	0	0.780563	0.999	0.981	0	Epithelial cells
PEBP1	0	0.780399	0.953	0.703	0	Epithelial cells
COX6A1	0	0.766029	0.98	0.808	0	Epithelial cells
HMGN1	0	0.762329	0.966	0.711	0	Epithelial cells
ALDOA	0	0.756937	0.602	0.27	0	Epithelial cells
MESP1	0	0.755207	0.543	0.108	0	Epithelial cells
DCXR	0	0.752999	0.863	0.417	0	Epithelial cells
LAGE3	0	0.745902	0.799	0.399	0	Epithelial cells
ADI1	0	0.742217	0.815	0.403	0	Epithelial cells
GADD45G	0	0.741488	0.498	0.176	0	Epithelial cells
PABPC1	0	0.741393	0.973	0.845	0	Epithelial cells
TSPAN1	0	0.737004	0.374	0.068	0	Epithelial cells
ATP5J	0	0.736832	0.45	0.184	0	Epithelial cells
UQCRQ	0	0.734102	0.963	0.777	0	Epithelial cells
ATP5G1	0	0.733554	0.427	0.156	0	Epithelial cells
GTF2H5	0	0.729837	0.837	0.37	0	Epithelial cells
YIPF6	0	0.726532	0.517	0.201	0	Epithelial cells
PCBD1	0	0.725762	0.904	0.477	0	Epithelial cells
PHLDA2	0	0.722083	0.745	0.446	0	Epithelial cells
NENF	0	0.721516	0.918	0.542	0	Epithelial cells
C11orf31	0	0.719509	0.447	0.176	0	Epithelial cells
TMEM141	0	0.717391	0.813	0.368	0	Epithelial cells
MAL2	0	0.716361	0.587	0.113	0	Epithelial cells
SNHG25	0	0.715678	0.886	0.545	0	Epithelial cells
C14orf2	0	0.713548	0.46	0.189	0	Epithelial cells
COX6C	0	0.712205	0.981	0.849	0	Epithelial cells
PDCD5	0	0.709883	0.862	0.464	0	Epithelial cells
SRP9	0	0.708425	0.864	0.494	0	Epithelial cells
PAFAH1B3	0	0.708009	0.684	0.244	0	Epithelial cells
PPP1R1B	0	0.706183	0.447	0.095	0	Epithelial cells
POLR2I	0	0.706071	0.891	0.523	0	Epithelial cells
ATP5D	0	0.706012	0.456	0.186	0	Epithelial cells
C7orf73	0	0.705471	0.411	0.135	0	Epithelial cells
BAMBI	0	0.704635	0.441	0.149	0	Epithelial cells
TUBB4B	0	0.704614	0.872	0.62	0	Epithelial cells
SEC11C	0	0.703233	0.731	0.387	0	Epithelial cells
CENPX	0	0.701833	0.46	0.234	0	Epithelial cells
COX20	0	0.701031	0.814	0.454	0	Epithelial cells
HMGN2	0	0.698525	0.94	0.748	0	Epithelial cells
WBP5	0	0.69723	0.364	0.128	0	Epithelial cells
HIST3H2A	0	0.697221	0.681	0.232	0	Epithelial cells
C19orf43	0	0.696756	0.436	0.176	0	Epithelial cells
PRMT1	0	0.689728	0.758	0.395	0	Epithelial cells
GAMT	0	0.687265	0.637	0.245	0	Epithelial cells
SET	0	0.68514	0.916	0.587	0	Epithelial cells
SNRPD1	0	0.684672	0.887	0.522	0	Epithelial cells
CNPY2	0	0.684254	0.888	0.468	0	Epithelial cells
CXADR	0	0.683761	0.559	0.085	0	Epithelial cells
PPA1	0	0.682023	0.877	0.51	0	Epithelial cells
PAPSS1	0	0.680906	0.499	0.169	0	Epithelial cells
TPD52	0	0.679446	0.7	0.189	0	Epithelial cells
CNFN	0	0.679407	0.404	0.085	0	Epithelial cells
MRPL12	0	0.679051	0.776	0.328	0	Epithelial cells
ATF3	0	0.678714	0.849	0.509	0	Epithelial cells
HOXB13	0	0.676739	0.592	0.123	0	Epithelial cells
CBX3	0	0.675692	0.884	0.531	0	Epithelial cells
LSM4	0	0.672204	0.834	0.443	0	Epithelial cells
H1FX	0	0.67158	0.804	0.41	0	Epithelial cells
MRPS26	0	0.670436	0.794	0.326	0	Epithelial cells
SPDEF	0	0.667191	0.458	0.096	0	Epithelial cells
ATP5O	0	0.665999	0.435	0.167	0	Epithelial cells
ATP5B	0	0.664003	0.398	0.141	0	Epithelial cells
NUCKS1	0	0.660394	0.908	0.568	0	Epithelial cells
HMGB3	0	0.658468	0.52	0.13	0	Epithelial cells
NME1	0	0.65699	0.813	0.409	0	Epithelial cells
ENSA	0	0.655965	0.877	0.5	0	Epithelial cells
DDT	0	0.655755	0.912	0.619	0	Epithelial cells
RANBP1	0	0.654267	0.839	0.47	0	Epithelial cells
DSP	0	0.65208	0.524	0.116	0	Epithelial cells
UQCR10	0	0.651718	0.973	0.729	0	Epithelial cells
ERRFI1	0	0.650628	0.6	0.225	0	Epithelial cells
DEK	0	0.650566	0.838	0.524	0	Epithelial cells
KRTCAP3	0	0.649971	0.607	0.109	0	Epithelial cells
STEAP1	0	0.649634	0.399	0.1	0	Epithelial cells
PODXL2	0	0.647183	0.582	0.133	0	Epithelial cells
RPS10	0	0.642587	0.996	0.963	0	Epithelial cells
IDH2	0	0.641098	0.719	0.315	0	Epithelial cells
RPS18	0	0.640121	1	0.999	0	Epithelial cells
MIEN1	0	0.639449	0.824	0.406	0	Epithelial cells
GLTSCR2	0	0.638943	0.461	0.191	0	Epithelial cells
SNRPF	0	0.638384	0.914	0.591	0	Epithelial cells
IGFBP2	0	0.631768	0.621	0.322	0	Epithelial cells
RAB4A	0	0.628161	0.79	0.352	0	Epithelial cells
CRNDE	0	0.628006	0.642	0.165	0	Epithelial cells
BEX2	0	0.626147	0.615	0.157	0	Epithelial cells
SLC45A3	0	0.624727	0.323	0.087	0	Epithelial cells
TBCA	0	0.622558	0.957	0.717	0	Epithelial cells
CCDC167	0	0.620674	0.71	0.288	0	Epithelial cells
POLD2	0	0.618508	0.72	0.274	0	Epithelial cells
UQCR11	0	0.618329	0.984	0.857	0	Epithelial cells
RHOB	0	0.617053	0.814	0.438	0	Epithelial cells
SERINC2	0	0.616622	0.505	0.118	0	Epithelial cells
UQCC2	0	0.616611	0.811	0.399	0	Epithelial cells
C17orf89	0	0.61235	0.41	0.146	0	Epithelial cells
TMPRSS2	0	0.612099	0.359	0.073	0	Epithelial cells
MAP2K2	0	0.611056	0.735	0.357	0	Epithelial cells
MPP6	0	0.610898	0.418	0.098	0	Epithelial cells
C4orf48	0	0.610725	0.796	0.581	0	Epithelial cells
CDK4	0	0.607671	0.766	0.341	0	Epithelial cells
ALKBH7	0	0.607081	0.893	0.526	0	Epithelial cells
KLF5	0	0.605895	0.438	0.105	0	Epithelial cells
PCDH7	0	0.605558	0.276	0.062	0	Epithelial cells
ATP6V0E2	0	0.603689	0.593	0.152	0	Epithelial cells
AC010642.2	0	0.603582	0.451	0.202	0	Epithelial cells
MRPL57	0	0.603373	0.89	0.51	0	Epithelial cells
DPM3	0	0.60236	0.848	0.446	0	Epithelial cells
LSM5	0	0.60232	0.841	0.451	0	Epithelial cells
MIF	0	0.600969	0.936	0.737	0	Epithelial cells
ZNF385B	0	0.598038	0.414	0.07	0	Epithelial cells
NDUFB2	0	0.596052	0.974	0.8	0	Epithelial cells
MRPL14	0	0.595835	0.846	0.432	0	Epithelial cells
C19orf81	0	0.595227	0.355	0.085	0	Epithelial cells
TMEM54	0	0.594071	0.615	0.182	0	Epithelial cells
PTOV1	0	0.59381	0.692	0.259	0	Epithelial cells
PLEKHJ1	0	0.593781	0.714	0.279	0	Epithelial cells
HNRNPAB	0	0.593645	0.795	0.413	0	Epithelial cells
SELK	0	0.593318	0.42	0.17	0	Epithelial cells
STRA13	0	0.592736	0.384	0.125	0	Epithelial cells
HES6	0	0.592646	0.294	0.051	0	Epithelial cells
MLEC	0	0.590327	0.808	0.411	0	Epithelial cells
ATXN7L3B	0	0.589949	0.6	0.194	0	Epithelial cells
TMEM147	0	0.588718	0.877	0.529	0	Epithelial cells
PSMB5	0	0.586074	0.855	0.469	0	Epithelial cells
MAP3K13	0	0.584668	0.787	0.34	0	Epithelial cells
SMC2	0	0.583757	0.257	0.068	0	Epithelial cells
TUBB	0	0.581509	0.899	0.636	0	Epithelial cells
ATP6V0B	0	0.581491	0.889	0.606	0	Epithelial cells
NHP2	0	0.581456	0.879	0.52	0	Epithelial cells
ALCAM	0	0.581018	0.459	0.124	0	Epithelial cells
HPN	0	0.579436	0.5	0.098	0	Epithelial cells
UQCC3	0	0.578688	0.743	0.291	0	Epithelial cells
SF3B6	0	0.577075	0.928	0.611	0	Epithelial cells
MRPS33	0	0.575382	0.8	0.363	0	Epithelial cells
APOA1BP	0	0.574131	0.376	0.124	0	Epithelial cells
RAN	0	0.572312	0.952	0.783	0	Epithelial cells
AURKAIP1	0	0.572213	0.921	0.576	0	Epithelial cells
MRPL41	0	0.570965	0.905	0.604	0	Epithelial cells
ENAH	0	0.57095	0.673	0.247	0	Epithelial cells
H2AFY	0	0.570353	0.727	0.387	0	Epithelial cells
RHOU	0	0.569932	0.374	0.107	0	Epithelial cells
RPA3	0	0.568516	0.612	0.264	0	Epithelial cells
HOOK2	0	0.56777	0.663	0.185	0	Epithelial cells
SPINT1	0	0.567587	0.55	0.103	0	Epithelial cells
TRIB1	0	0.566985	0.707	0.347	0	Epithelial cells
C19orf70	0	0.566324	0.881	0.588	0	Epithelial cells
YWHAE	0	0.565884	0.938	0.627	0	Epithelial cells
KIF5C	0	0.565884	0.409	0.072	0	Epithelial cells
PYCR1	0	0.563749	0.594	0.168	0	Epithelial cells
ACP1	0	0.562039	0.804	0.386	0	Epithelial cells
NME4	0	0.561533	0.787	0.448	0	Epithelial cells
RASD1	0	0.561418	0.439	0.144	0	Epithelial cells
FAM84A	0	0.559785	0.365	0.091	0	Epithelial cells
DUS1L	0	0.559723	0.671	0.229	0	Epithelial cells
GGCT	0	0.558015	0.692	0.279	0	Epithelial cells
YWHAQ	0	0.557841	0.888	0.556	0	Epithelial cells
C8orf82	0	0.55775	0.604	0.16	0	Epithelial cells
CISD3	0	0.556964	0.752	0.325	0	Epithelial cells
PHF6	0	0.555784	0.458	0.143	0	Epithelial cells
RAB3IP	0	0.555676	0.542	0.109	0	Epithelial cells
CBLN2	0	0.555597	0.294	0.04	0	Epithelial cells
MRPL55	0	0.555087	0.832	0.414	0	Epithelial cells
LAMTOR2	0	0.554789	0.887	0.537	0	Epithelial cells
RPS15	0	0.55338	1	0.999	0	Epithelial cells
SIVA1	0	0.552357	0.882	0.611	0	Epithelial cells
OCIAD2	0	0.550531	0.796	0.362	0	Epithelial cells
PSMB1	0	0.550363	0.89	0.648	0	Epithelial cells
TMEM134	0	0.548931	0.769	0.355	0	Epithelial cells
ZNF593	0	0.547939	0.727	0.316	0	Epithelial cells
CTXN1	0	0.54793	0.438	0.098	0	Epithelial cells
BRINP3	0	0.547328	0.272	0.039	0	Epithelial cells
TMC5	0	0.547244	0.389	0.079	0	Epithelial cells
GMNN	0	0.547237	0.5	0.116	0	Epithelial cells
ATPIF1	0	0.547081	0.397	0.143	0	Epithelial cells
MARCKS	0	0.546275	0.799	0.457	0	Epithelial cells
SYT1	0	0.544732	0.25	0.05	0	Epithelial cells
FAM89B	0	0.544272	0.716	0.344	0	Epithelial cells
NDUFS6	0	0.544227	0.918	0.656	0	Epithelial cells
DNAJC12	0	0.54413	0.353	0.069	0	Epithelial cells
ZFAS1	0	0.544106	0.977	0.808	0	Epithelial cells
SLC25A39	0	0.543991	0.797	0.403	0	Epithelial cells
MRPS21	0	0.543436	0.944	0.677	0	Epithelial cells
COX5A	0	0.543275	0.895	0.601	0	Epithelial cells
LSR	0	0.541924	0.535	0.141	0	Epithelial cells
TSEN34	0	0.538901	0.718	0.284	0	Epithelial cells
COX8A	0	0.538285	0.977	0.813	0	Epithelial cells
MINOS1	0	0.536926	0.92	0.616	0	Epithelial cells
DYNLT1	0	0.536371	0.871	0.526	0	Epithelial cells
ETFB	0	0.53385	0.761	0.424	0	Epithelial cells
RCN2	0	0.533649	0.688	0.336	0	Epithelial cells
RPL12	0	0.533578	1	0.998	0	Epithelial cells
EI24	0	0.533542	0.775	0.333	0	Epithelial cells
RETREG1	0	0.533257	0.297	0.058	0	Epithelial cells
NDUFB9	0	0.532898	0.911	0.612	0	Epithelial cells
MDH2	0	0.532718	0.827	0.471	0	Epithelial cells
TCEB1	0	0.531639	0.404	0.154	0	Epithelial cells
AP1S1	0	0.531258	0.638	0.239	0	Epithelial cells
MBOAT2	0	0.531253	0.488	0.111	0	Epithelial cells
TMC4	0	0.530558	0.464	0.083	0	Epithelial cells
ARFGEF3	0	0.530431	0.435	0.085	0	Epithelial cells
PXMP2	0	0.529701	0.54	0.128	0	Epithelial cells
ATP5H	0	0.529554	0.407	0.15	0	Epithelial cells
UQCRH	0	0.529263	0.985	0.844	0	Epithelial cells
SLIRP	0	0.529118	0.86	0.563	0	Epithelial cells
MYL6B	0	0.528899	0.766	0.374	0	Epithelial cells
GLO1	0	0.528765	0.735	0.297	0	Epithelial cells
AFF3	0	0.528703	0.331	0.084	0	Epithelial cells
AP001816.1	0	0.527621	0.307	0.093	0	Epithelial cells
AP1M2	0	0.526718	0.514	0.078	0	Epithelial cells
BMPR1B	0	0.5261	0.395	0.085	0	Epithelial cells
CENPV	0	0.525832	0.508	0.128	0	Epithelial cells
HINT1	0	0.524979	0.993	0.879	0	Epithelial cells
STOML2	0	0.524004	0.831	0.431	0	Epithelial cells
RPS4X	0	0.523246	0.999	0.996	0	Epithelial cells
SNHG9	0	0.522326	0.758	0.392	0	Epithelial cells
MEA1	0	0.521232	0.784	0.372	0	Epithelial cells
CCT3	0	0.520608	0.872	0.575	0	Epithelial cells
POLR2H	0	0.520349	0.726	0.302	0	Epithelial cells
NDUFB11	0	0.519729	0.93	0.712	0	Epithelial cells
CBX1	0	0.5174	0.659	0.248	0	Epithelial cells
SLC25A4	0	0.517303	0.565	0.192	0	Epithelial cells
ERH	0	0.515737	0.868	0.585	0	Epithelial cells
DPY30	0	0.515551	0.723	0.354	0	Epithelial cells
TRAF4	0	0.514579	0.676	0.231	0	Epithelial cells
PARP1	0	0.513719	0.69	0.277	0	Epithelial cells
SYNE4	0	0.513675	0.537	0.1	0	Epithelial cells
LINC00493	0	0.513328	0.421	0.159	0	Epithelial cells
SOX9	0	0.512243	0.336	0.07	0	Epithelial cells
COMTD1	0	0.511453	0.557	0.178	0	Epithelial cells
FAM213A	0	0.510132	0.719	0.298	0	Epithelial cells
PA2G4	0	0.509528	0.803	0.452	0	Epithelial cells
FASN	0	0.509022	0.512	0.149	0	Epithelial cells
FAM60A	0	0.50863	0.262	0.063	0	Epithelial cells
UQCRFS1	0	0.507953	0.823	0.447	0	Epithelial cells
SNRPB	0	0.50773	0.859	0.603	0	Epithelial cells
P4HB	0	0.50716	0.878	0.58	0	Epithelial cells
CBX4	0	0.507132	0.551	0.165	0	Epithelial cells
RPL36	0	0.505996	1	0.998	0	Epithelial cells
COPRS	0	0.505147	0.693	0.269	0	Epithelial cells
LSM3	0	0.503803	0.857	0.521	0	Epithelial cells
NDUFB4	0	0.50348	0.945	0.7	0	Epithelial cells
CAMK2B	0	0.503177	0.319	0.061	0	Epithelial cells
ABHD2	0	0.5023	0.551	0.201	0	Epithelial cells
STEAP2	0	0.501339	0.36	0.089	0	Epithelial cells
MAGEF1	0	0.500842	0.593	0.156	0	Epithelial cells
CYC1	0	0.500186	0.779	0.405	0	Epithelial cells
IER2	1.33705e-288	0.577089	0.909	0.659	4.02103e-284	Epithelial cells
SSR4	3.05005e-280	0.686283	0.976	0.863	9.17273e-276	Epithelial cells
DSEL	9.23211e-280	0.725196	0.298	0.111	2.77647e-275	Epithelial cells
CPE	8.05175e-264	0.754218	0.481	0.222	2.42148e-259	Epithelial cells
TP53I3	2.06254e-257	0.535681	0.338	0.144	6.2029e-253	Epithelial cells
PMEPA1	5.58479e-251	0.617767	0.606	0.382	1.67957e-246	Epithelial cells
MMP7	1.24566e-247	1.51918	0.277	0.106	3.74619e-243	Epithelial cells
SLPI	7.29873e-229	1.23326	0.262	0.1	2.19502e-224	Epithelial cells
C8orf4	1.06374e-218	0.567202	0.257	0.098	3.19909e-214	Epithelial cells
SPON2	2.45296e-212	1.38371	0.477	0.321	7.37704e-208	Epithelial cells
FABP5	4.66214e-187	0.721588	0.549	0.324	1.40209e-182	Epithelial cells
C6orf15	5.28531e-181	2.61967	0.16	0.377	1.5895e-176	Epithelial cells
ID3	7.02942e-143	0.560085	0.769	0.589	2.11403e-138	Epithelial cells
TPD52L1	1.86722e-133	0.758938	0.265	0.137	5.61549e-129	Epithelial cells
JPT1	2.97749e-133	0.678371	0.498	0.407	8.9545e-129	Epithelial cells
HIST1H1C	8.54719e-129	0.845402	0.323	0.173	2.57048e-124	Epithelial cells
BEX3	5.43347e-106	0.537565	0.492	0.389	1.63406e-101	Epithelial cells
RPS17	2.88681e-101	0.63728	0.874	0.796	8.68179e-97	Epithelial cells
CXCL1	4.84419e-65	0.775816	0.298	0.198	1.45684e-60	Epithelial cells
RBP1	4.13461e-38	1.57376	0.382	0.346	1.24344e-33	Epithelial cells
ASPSCR1	6.19204e-06	2.32882	0.52	0.441	0.186219	Epithelial cells
TAGLN	0	4.90612	0.949	0.231	0	Myofibroblasts
ACTA2	0	4.73023	0.889	0.142	0	Myofibroblasts
MYL9	0	4.03765	0.963	0.245	0	Myofibroblasts
C11orf96	0	4.01573	0.959	0.265	0	Myofibroblasts
TPM2	0	3.96756	0.964	0.206	0	Myofibroblasts
ADIRF	0	3.87969	0.965	0.331	0	Myofibroblasts
NDUFA4L2	0	3.40614	0.706	0.082	0	Myofibroblasts
RGS5	0	3.2773	0.798	0.114	0	Myofibroblasts
CALD1	0	3.14869	0.985	0.495	0	Myofibroblasts
MYH11	0	3.11417	0.741	0.037	0	Myofibroblasts
SPARCL1	0	3.07868	0.905	0.171	0	Myofibroblasts
PPP1R14A	0	3.01221	0.792	0.065	0	Myofibroblasts
CRYAB	0	2.62662	0.729	0.182	0	Myofibroblasts
SOD3	0	2.60049	0.87	0.128	0	Myofibroblasts
IGFBP7	0	2.57836	1	0.443	0	Myofibroblasts
HIGD1B	0	2.5695	0.437	0.022	0	Myofibroblasts
COL18A1	0	2.50701	0.787	0.241	0	Myofibroblasts
TPM1	0	2.43872	0.9	0.63	0	Myofibroblasts
NOTCH3	0	2.38545	0.802	0.117	0	Myofibroblasts
BGN	0	2.37796	0.92	0.182	0	Myofibroblasts
ACTG2	0	2.34679	0.439	0.021	0	Myofibroblasts
CAV1	0	2.27804	0.822	0.135	0	Myofibroblasts
PLAC9	0	2.26513	0.837	0.13	0	Myofibroblasts
MFGE8	0	2.26108	0.822	0.207	0	Myofibroblasts
SELENOM	0	2.21419	0.837	0.303	0	Myofibroblasts
FLNA	0	2.1805	0.81	0.379	0	Myofibroblasts
CAVIN3	0	2.15791	0.741	0.103	0	Myofibroblasts
MYLK	0	2.13306	0.674	0.084	0	Myofibroblasts
CSRP2	0	2.13301	0.736	0.22	0	Myofibroblasts
COL6A2	0	2.13265	0.839	0.19	0	Myofibroblasts
DSTN	0	2.11406	0.974	0.843	0	Myofibroblasts
VIM	0	2.10377	0.994	0.579	0	Myofibroblasts
MCAM	0	2.07352	0.652	0.072	0	Myofibroblasts
CNN1	0	2.02846	0.513	0.031	0	Myofibroblasts
COL4A2	0	2.02811	0.669	0.147	0	Myofibroblasts
GJA4	0	2.0201	0.575	0.022	0	Myofibroblasts
FILIP1L	0	2.00971	0.691	0.113	0	Myofibroblasts
IFITM3	0	1.96875	0.988	0.567	0	Myofibroblasts
CSRP1	0	1.95589	0.685	0.325	0	Myofibroblasts
LGALS1	0	1.91546	0.996	0.614	0	Myofibroblasts
CYTOR	0	1.85793	0.609	0.208	0	Myofibroblasts
IGFBP5	0	1.83671	0.633	0.176	0	Myofibroblasts
PDGFRB	0	1.82876	0.641	0.072	0	Myofibroblasts
TGFB1I1	0	1.82757	0.65	0.091	0	Myofibroblasts
LHFPL6	0	1.81763	0.632	0.092	0	Myofibroblasts
MT1M	0	1.79791	0.406	0.08	0	Myofibroblasts
RERGL	0	1.79131	0.288	0.011	0	Myofibroblasts
COX4I2	0	1.75735	0.444	0.011	0	Myofibroblasts
A2M	0	1.72804	0.864	0.205	0	Myofibroblasts
COL4A1	0	1.71345	0.579	0.129	0	Myofibroblasts
FXYD1	0	1.66945	0.629	0.105	0	Myofibroblasts
COL6A1	0	1.667	0.687	0.166	0	Myofibroblasts
NNMT	0	1.64329	0.594	0.187	0	Myofibroblasts
COX7A1	0	1.63982	0.725	0.142	0	Myofibroblasts
SERPING1	0	1.63203	0.741	0.234	0	Myofibroblasts
SPARC	0	1.61664	0.725	0.233	0	Myofibroblasts
RRAS	0	1.60401	0.611	0.173	0	Myofibroblasts
MEF2C	0	1.60152	0.614	0.119	0	Myofibroblasts
TPM4	0	1.59369	0.84	0.478	0	Myofibroblasts
CAVIN1	0	1.5895	0.663	0.167	0	Myofibroblasts
FRZB	0	1.57794	0.518	0.056	0	Myofibroblasts
PLN	0	1.56438	0.418	0.013	0	Myofibroblasts
RRAD	0	1.5628	0.392	0.081	0	Myofibroblasts
TINAGL1	0	1.56046	0.613	0.135	0	Myofibroblasts
MYL6	0	1.54773	0.999	0.979	0	Myofibroblasts
CRIP2	0	1.50768	0.783	0.414	0	Myofibroblasts
IFITM2	0	1.49862	0.928	0.501	0	Myofibroblasts
ID4	0	1.48855	0.527	0.149	0	Myofibroblasts
MGP	0	1.43463	0.981	0.571	0	Myofibroblasts
LMOD1	0	1.42212	0.457	0.019	0	Myofibroblasts
AEBP1	0	1.41162	0.612	0.121	0	Myofibroblasts
PGF	0	1.40716	0.558	0.135	0	Myofibroblasts
LMNA	0	1.40036	0.926	0.661	0	Myofibroblasts
TIMP1	0	1.39589	0.955	0.565	0	Myofibroblasts
SYNPO2	0	1.38516	0.476	0.054	0	Myofibroblasts
MAP3K20	0	1.37829	0.498	0.067	0	Myofibroblasts
PDLIM7	0	1.34743	0.588	0.209	0	Myofibroblasts
WFDC1	0	1.32495	0.371	0.019	0	Myofibroblasts
SH3BGRL	0	1.26742	0.761	0.325	0	Myofibroblasts
PLXDC1	0	1.26233	0.361	0.051	0	Myofibroblasts
EHD2	0	1.26084	0.522	0.077	0	Myofibroblasts
EPS8	0	1.23746	0.538	0.171	0	Myofibroblasts
ADAMTS4	0	1.21868	0.354	0.049	0	Myofibroblasts
RCAN2	0	1.21185	0.456	0.083	0	Myofibroblasts
TIMP3	0	1.1973	0.6	0.198	0	Myofibroblasts
KANK2	0	1.19369	0.489	0.131	0	Myofibroblasts
EPAS1	0	1.18806	0.605	0.191	0	Myofibroblasts
C2orf40	0	1.1868	0.362	0.045	0	Myofibroblasts
PDLIM3	0	1.18261	0.473	0.084	0	Myofibroblasts
PRRX1	0	1.17343	0.493	0.075	0	Myofibroblasts
PLS3	0	1.16427	0.472	0.104	0	Myofibroblasts
COL3A1	0	1.15831	0.578	0.147	0	Myofibroblasts
RBPMS	0	1.14719	0.534	0.164	0	Myofibroblasts
COL14A1	0	1.14409	0.444	0.045	0	Myofibroblasts
C1QTNF1	0	1.13088	0.404	0.033	0	Myofibroblasts
MAP3K7CL	0	1.09544	0.327	0.024	0	Myofibroblasts
IGFBP4	0	1.08602	0.726	0.243	0	Myofibroblasts
KCNE4	0	1.07319	0.329	0.02	0	Myofibroblasts
EFHD1	0	1.07301	0.43	0.037	0	Myofibroblasts
TNS1	0	1.0591	0.475	0.107	0	Myofibroblasts
COL1A2	0	1.04429	0.657	0.171	0	Myofibroblasts
CCDC3	0	1.02298	0.378	0.058	0	Myofibroblasts
CAV2	0	1.02296	0.475	0.101	0	Myofibroblasts
GGT5	0	1.01927	0.407	0.077	0	Myofibroblasts
CRISPLD2	0	1.01419	0.411	0.09	0	Myofibroblasts
NTRK2	0	1.01115	0.361	0.036	0	Myofibroblasts
DKK3	0	1.00993	0.471	0.093	0	Myofibroblasts
SLIT3	0	0.989734	0.365	0.026	0	Myofibroblasts
ANGPT2	0	0.985924	0.449	0.083	0	Myofibroblasts
ARHGEF17	0	0.977235	0.401	0.08	0	Myofibroblasts
CARMN	0	0.960602	0.306	0.013	0	Myofibroblasts
ITGA1	0	0.944816	0.388	0.075	0	Myofibroblasts
SEPT4	0	0.938706	0.359	0.051	0	Myofibroblasts
ITGA7	0	0.920742	0.339	0.015	0	Myofibroblasts
ITIH5	0	0.916485	0.271	0.026	0	Myofibroblasts
SGCA	0	0.914766	0.289	0.007	0	Myofibroblasts
LGI4	0	0.912462	0.307	0.018	0	Myofibroblasts
CSPG4	0	0.910472	0.321	0.01	0	Myofibroblasts
COL1A1	0	0.880839	0.629	0.188	0	Myofibroblasts
NEXN	0	0.869954	0.318	0.041	0	Myofibroblasts
GUCY1B1	0	0.868854	0.315	0.031	0	Myofibroblasts
PTMA	0	0.847572	1	0.998	0	Myofibroblasts
MRVI1	0	0.842319	0.301	0.015	0	Myofibroblasts
ESAM	0	0.82818	0.4	0.065	0	Myofibroblasts
EBF1	0	0.809238	0.361	0.053	0	Myofibroblasts
PDE5A	0	0.808667	0.312	0.05	0	Myofibroblasts
KCNMB1	0	0.777495	0.294	0.029	0	Myofibroblasts
EDNRA	0	0.768225	0.309	0.047	0	Myofibroblasts
FOXC2	0	0.758828	0.267	0.019	0	Myofibroblasts
PRKG1	0	0.726822	0.273	0.038	0	Myofibroblasts
FILIP1	0	0.723268	0.273	0.03	0	Myofibroblasts
GSN	0	0.717695	0.836	0.388	0	Myofibroblasts
AOC3	0	0.714851	0.263	0.023	0	Myofibroblasts
RASL12	0	0.698	0.271	0.017	0	Myofibroblasts
FOXS1	0	0.687074	0.269	0.029	0	Myofibroblasts
HEYL	0	0.667495	0.273	0.026	0	Myofibroblasts
HEY2	6.19853e-303	0.668122	0.259	0.037	1.86415e-298	Myofibroblasts
ADAMTS1	2.07112e-300	1.35498	0.487	0.139	6.22867e-296	Myofibroblasts
TBX2	4.2933e-292	1.01378	0.405	0.096	1.29117e-287	Myofibroblasts
PALLD	6.96492e-282	1.15928	0.525	0.172	2.09463e-277	Myofibroblasts
CPE	4.82754e-281	1.09231	0.697	0.332	1.45183e-276	Myofibroblasts
THY1	3.05978e-279	2.04135	0.412	0.103	9.20198e-275	Myofibroblasts
RASGRP2	1.28572e-276	0.635219	0.266	0.042	3.86668e-272	Myofibroblasts
PDLIM1	5.30394e-276	1.31455	0.701	0.335	1.59511e-271	Myofibroblasts
CD63	1.4173e-275	1.03597	0.991	0.895	4.26238e-271	Myofibroblasts
NR2F2	1.65534e-273	1.54207	0.686	0.336	4.97827e-269	Myofibroblasts
LPP	2.23956e-271	1.55558	0.692	0.381	6.73524e-267	Myofibroblasts
IER3	2.20092e-269	2.76173	0.778	0.45	6.61905e-265	Myofibroblasts
HSPB6	5.40779e-266	0.972936	0.339	0.072	1.62634e-261	Myofibroblasts
SGIP1	6.90185e-265	0.617161	0.252	0.039	2.07566e-260	Myofibroblasts
ITGB1	1.4113e-259	1.29307	0.806	0.58	4.24434e-255	Myofibroblasts
MGST3	1.70203e-258	1.30768	0.841	0.665	5.11869e-254	Myofibroblasts
FN1	1.28507e-257	1.38828	0.625	0.257	3.86473e-253	Myofibroblasts
MT2A	2.23398e-252	1.51645	0.95	0.777	6.71846e-248	Myofibroblasts
ACTN1	1.41826e-251	1.31584	0.61	0.285	4.26527e-247	Myofibroblasts
HES4	4.63301e-250	1.39616	0.742	0.441	1.39333e-245	Myofibroblasts
PTN	8.34182e-250	0.940155	0.348	0.076	2.50872e-245	Myofibroblasts
RERG	3.24531e-249	0.563954	0.25	0.041	9.75994e-245	Myofibroblasts
TBX2-AS1	1.87648e-246	1.03775	0.393	0.11	5.64332e-242	Myofibroblasts
C1R	8.17988e-244	1.09927	0.511	0.166	2.46002e-239	Myofibroblasts
ZEB2	1.68881e-243	0.855459	0.433	0.122	5.07892e-239	Myofibroblasts
MSRB3	1.33974e-239	0.921088	0.429	0.129	4.02913e-235	Myofibroblasts
PPP1R12B	6.20248e-237	0.980587	0.384	0.108	1.86533e-232	Myofibroblasts
PCOLCE	2.73391e-236	1.0073	0.483	0.156	8.22195e-232	Myofibroblasts
C12orf57	8.23463e-235	0.96708	0.945	0.844	2.47648e-230	Myofibroblasts
LTBP1	2.17291e-229	1.04875	0.434	0.139	6.5348e-225	Myofibroblasts
FOXC1	6.74555e-229	0.894522	0.332	0.079	2.02866e-224	Myofibroblasts
PDGFA	7.90068e-227	1.21222	0.47	0.171	2.37605e-222	Myofibroblasts
INAFM1	2.48785e-225	1.11648	0.531	0.216	7.48195e-221	Myofibroblasts
TLN1	8.36701e-223	1.37196	0.645	0.361	2.5163e-218	Myofibroblasts
GEM	3.31658e-217	1.53305	0.492	0.173	9.97429e-213	Myofibroblasts
DLC1	5.19375e-216	0.741636	0.328	0.079	1.56197e-211	Myofibroblasts
LRRC32	6.92639e-213	0.663729	0.29	0.063	2.08304e-208	Myofibroblasts
TPPP3	1.05104e-212	1.33694	0.523	0.208	3.1609e-208	Myofibroblasts
MAP1B	1.02261e-211	1.0899	0.663	0.327	3.07538e-207	Myofibroblasts
SEPT7	2.65706e-211	1.36264	0.788	0.612	7.99084e-207	Myofibroblasts
LAMA4	2.20414e-209	0.731393	0.368	0.098	6.62872e-205	Myofibroblasts
WTIP	1.94075e-208	0.751848	0.253	0.051	5.83662e-204	Myofibroblasts
LAMB2	3.8777e-208	0.901224	0.435	0.147	1.16618e-203	Myofibroblasts
SELENOW	7.01096e-207	1.10418	0.822	0.52	2.10848e-202	Myofibroblasts
TSC22D1	2.80659e-206	1.36148	0.8	0.576	8.44054e-202	Myofibroblasts
AXL	5.62258e-201	0.664941	0.337	0.087	1.69094e-196	Myofibroblasts
CD151	1.21115e-198	1.34456	0.767	0.573	3.64241e-194	Myofibroblasts
DDR2	3.73637e-196	0.555616	0.262	0.055	1.12368e-191	Myofibroblasts
ADGRA2	9.14185e-196	0.562003	0.259	0.054	2.74932e-191	Myofibroblasts
DEPP1	1.1146e-195	1.17486	0.252	0.052	3.35206e-191	Myofibroblasts
TMEM47	1.09812e-189	0.576802	0.274	0.063	3.30249e-185	Myofibroblasts
JAG1	4.56682e-189	0.835676	0.409	0.14	1.37343e-184	Myofibroblasts
HSPB1	1.96502e-186	1.24808	0.989	0.947	5.90961e-182	Myofibroblasts
ACTB	1.51642e-185	0.934782	0.987	0.981	4.56048e-181	Myofibroblasts
CYB5R3	1.74678e-185	1.06754	0.705	0.483	5.25325e-181	Myofibroblasts
ANXA6	1.86846e-183	0.938576	0.453	0.175	5.61921e-179	Myofibroblasts
MIR4435-2HG	9.596e-182	1.37027	0.513	0.226	2.8859e-177	Myofibroblasts
SMTN	2.15925e-180	0.837763	0.381	0.129	6.49372e-176	Myofibroblasts
KLF9	6.4005e-175	0.915164	0.45	0.178	1.92489e-170	Myofibroblasts
MT1E	1.94221e-174	1.29638	0.646	0.317	5.84099e-170	Myofibroblasts
ACTN4	5.04497e-173	1.44745	0.667	0.455	1.51722e-168	Myofibroblasts
EMILIN1	3.06264e-172	0.502248	0.256	0.058	9.21057e-168	Myofibroblasts
FHL1	4.90532e-172	0.937048	0.4	0.137	1.47523e-167	Myofibroblasts
GUCY1A1	9.63238e-171	0.854111	0.387	0.134	2.89684e-166	Myofibroblasts
MT-ATP6	1.54204e-169	1.00903	1	0.997	4.63753e-165	Myofibroblasts
COL5A2	4.29814e-169	0.644486	0.301	0.08	1.29262e-164	Myofibroblasts
MYH9	5.89288e-169	1.06274	0.646	0.391	1.77222e-164	Myofibroblasts
MFAP4	8.18678e-168	1.26487	0.324	0.093	2.46209e-163	Myofibroblasts
PTP4A3	4.17222e-167	1.33793	0.525	0.273	1.25475e-162	Myofibroblasts
S1PR3	5.56341e-167	0.541944	0.253	0.061	1.67314e-162	Myofibroblasts
YBX3	2.79047e-163	1.08824	0.679	0.428	8.39205e-159	Myofibroblasts
CCDC80	3.71581e-160	0.557997	0.362	0.113	1.11749e-155	Myofibroblasts
LBH	5.06311e-160	1.14766	0.528	0.257	1.52268e-155	Myofibroblasts
PTMS	5.46779e-159	0.912402	0.942	0.796	1.64438e-154	Myofibroblasts
GADD45B	1.30634e-158	1.79032	0.818	0.66	3.9287e-154	Myofibroblasts
RABAC1	4.32932e-157	0.788726	0.86	0.736	1.302e-152	Myofibroblasts
HSPA1A	1.72702e-156	1.18814	0.936	0.776	5.19384e-152	Myofibroblasts
ILK	5.67189e-156	1.0191	0.53	0.279	1.70576e-151	Myofibroblasts
SORBS2	9.53659e-155	1.16613	0.374	0.14	2.86803e-150	Myofibroblasts
PKIG	2.95553e-154	0.919381	0.563	0.308	8.88845e-150	Myofibroblasts
NDRG2	1.33356e-153	0.790246	0.347	0.118	4.01054e-149	Myofibroblasts
KIAA0040	1.55217e-151	0.731313	0.32	0.102	4.66801e-147	Myofibroblasts
PRELP	7.77499e-151	0.525586	0.264	0.066	2.33825e-146	Myofibroblasts
AGT	7.65144e-150	0.579847	0.27	0.069	2.30109e-145	Myofibroblasts
TGFBI	1.03337e-149	0.656503	0.364	0.119	3.10777e-145	Myofibroblasts
FOSB	6.24703e-149	1.23694	0.886	0.81	1.87873e-144	Myofibroblasts
RARRES2	4.67318e-148	0.54131	0.499	0.203	1.40541e-143	Myofibroblasts
MSN	8.56171e-148	0.782028	0.572	0.286	2.57485e-143	Myofibroblasts
TFPI	1.36438e-146	0.595617	0.287	0.082	4.10324e-142	Myofibroblasts
CEBPD	6.40275e-146	1.49809	0.714	0.515	1.92556e-141	Myofibroblasts
ITM2B	3.78162e-144	0.684671	0.917	0.808	1.13729e-139	Myofibroblasts
AKAP12	6.61412e-144	0.752957	0.383	0.143	1.98913e-139	Myofibroblasts
RAB34	6.29367e-142	0.758744	0.531	0.263	1.89276e-137	Myofibroblasts
CRIP1	4.31666e-141	1.09508	0.623	0.343	1.29819e-136	Myofibroblasts
MXRA8	6.86839e-140	0.627136	0.346	0.116	2.0656e-135	Myofibroblasts
STOM	3.25274e-139	0.693534	0.491	0.218	9.7823e-135	Myofibroblasts
VCL	3.86839e-137	1.03059	0.454	0.225	1.16338e-132	Myofibroblasts
CALM1	2.0081e-136	0.743266	0.933	0.881	6.03917e-132	Myofibroblasts
SDC2	5.88536e-134	0.830821	0.495	0.243	1.76996e-129	Myofibroblasts
RHOC	5.53853e-132	0.815062	0.736	0.559	1.66566e-127	Myofibroblasts
H2AFJ	5.36687e-131	0.77772	0.749	0.507	1.61403e-126	Myofibroblasts
RGS16	9.32008e-130	1.23269	0.46	0.213	2.80292e-125	Myofibroblasts
SNCG	1.47618e-129	1.41196	0.375	0.149	4.43946e-125	Myofibroblasts
TAGLN2	7.81618e-129	0.694992	0.839	0.631	2.35064e-124	Myofibroblasts
PTK2	1.33575e-128	0.913786	0.46	0.244	4.01714e-124	Myofibroblasts
TUBA1A	2.02832e-128	0.88084	0.809	0.609	6.09997e-124	Myofibroblasts
SERPINH1	1.72439e-127	0.930774	0.611	0.379	5.18592e-123	Myofibroblasts
SERTAD1	3.48607e-127	1.22172	0.767	0.632	1.0484e-122	Myofibroblasts
HCFC1R1	1.03265e-125	1.07666	0.624	0.456	3.10558e-121	Myofibroblasts
S100A6	6.3649e-125	0.702417	0.952	0.747	1.91418e-120	Myofibroblasts
MTRNR2L12	7.43536e-125	0.84895	0.81	0.633	2.23611e-120	Myofibroblasts
CD59	1.72111e-124	0.788805	0.691	0.487	5.17608e-120	Myofibroblasts
SYNE1	4.82607e-124	0.560816	0.265	0.081	1.45139e-119	Myofibroblasts
UBB	6.23186e-124	0.566744	0.976	0.977	1.87417e-119	Myofibroblasts
FSTL1	1.12718e-121	0.617932	0.435	0.183	3.38989e-117	Myofibroblasts
CD81	5.54487e-121	1.07984	0.788	0.631	1.66756e-116	Myofibroblasts
RAB31	4.09134e-120	0.575788	0.362	0.14	1.23043e-115	Myofibroblasts
CCND2	6.27708e-119	0.596861	0.34	0.124	1.88777e-114	Myofibroblasts
LGALS3BP	9.99391e-119	0.862108	0.552	0.308	3.00557e-114	Myofibroblasts
FXYD6	7.31511e-118	0.717442	0.378	0.155	2.19995e-113	Myofibroblasts
MPRIP	2.1989e-117	0.850225	0.443	0.229	6.61296e-113	Myofibroblasts
MT-ND3	5.84411e-117	0.533729	1	0.996	1.75756e-112	Myofibroblasts
JUNB	1.01355e-115	1.07919	0.906	0.879	3.04814e-111	Myofibroblasts
GBP2	5.75133e-115	0.835317	0.393	0.169	1.72966e-110	Myofibroblasts
MAGED2	3.16074e-113	0.93653	0.575	0.384	9.50562e-109	Myofibroblasts
UACA	3.39032e-112	0.835283	0.328	0.131	1.0196e-107	Myofibroblasts
SORT1	9.30329e-110	0.595425	0.274	0.097	2.79787e-105	Myofibroblasts
ARID5B	5.02017e-109	0.969243	0.684	0.537	1.50977e-104	Myofibroblasts
S100A4	5.0396e-109	1.16723	0.702	0.464	1.51561e-104	Myofibroblasts
ETS1	8.01019e-109	0.643747	0.372	0.152	2.40898e-104	Myofibroblasts
LDHA	1.49014e-108	0.841292	0.8	0.726	4.48145e-104	Myofibroblasts
CNN3	3.4761e-107	0.742923	0.589	0.351	1.0454e-102	Myofibroblasts
CLMN	6.99626e-107	0.601038	0.254	0.086	2.10405e-102	Myofibroblasts
PPP1R12A	7.45776e-107	0.960939	0.532	0.35	2.24285e-102	Myofibroblasts
TIMP2	1.57739e-106	0.700411	0.563	0.331	4.74385e-102	Myofibroblasts
SORBS3	2.60951e-106	0.80795	0.439	0.235	7.84785e-102	Myofibroblasts
ZFHX3	2.95582e-105	0.96657	0.491	0.308	8.88933e-101	Myofibroblasts
INHBA	1.72196e-102	0.725623	0.298	0.104	5.17861e-98	Myofibroblasts
MTRNR2L1	1.75938e-98	0.996072	0.391	0.193	5.29116e-94	Myofibroblasts
GPX3	1.14447e-96	0.768326	0.37	0.172	3.44187e-92	Myofibroblasts
ATP2B4	1.31913e-96	0.577352	0.303	0.122	3.96715e-92	Myofibroblasts
MGLL	1.57997e-95	0.801638	0.416	0.216	4.7516e-91	Myofibroblasts
GPRC5C	7.08976e-95	0.856748	0.368	0.186	2.13217e-90	Myofibroblasts
NOP53	8.59844e-94	0.607659	0.788	0.567	2.58589e-89	Myofibroblasts
C1S	1.18523e-93	0.625462	0.345	0.141	3.56445e-89	Myofibroblasts
CTGF	1.02232e-92	0.56702	0.376	0.163	3.07451e-88	Myofibroblasts
PHLDA1	2.9939e-92	0.883169	0.63	0.418	9.00386e-88	Myofibroblasts
TRIP6	1.41595e-91	0.602441	0.34	0.156	4.25834e-87	Myofibroblasts
ISYNA1	1.54763e-91	0.872106	0.397	0.214	4.65435e-87	Myofibroblasts
RSU1	4.95388e-91	0.619012	0.379	0.189	1.48983e-86	Myofibroblasts
RAB13	1.15426e-90	0.672064	0.727	0.629	3.47133e-86	Myofibroblasts
CALM2	1.81831e-90	0.517761	0.927	0.906	5.46839e-86	Myofibroblasts
CDKN1A	4.49293e-90	1.16696	0.748	0.628	1.3512e-85	Myofibroblasts
THBS1	1.5335e-89	0.763391	0.364	0.169	4.61186e-85	Myofibroblasts
EVA1B	2.76064e-88	0.642528	0.489	0.263	8.30234e-84	Myofibroblasts
EID1	4.59585e-88	0.668475	0.771	0.721	1.38216e-83	Myofibroblasts
SKP1	2.34116e-86	0.530685	0.886	0.852	7.04079e-82	Myofibroblasts
IFI27L2	9.56478e-85	0.72336	0.592	0.417	2.87651e-80	Myofibroblasts
HLA-C	7.47391e-84	0.513187	0.911	0.747	2.2477e-79	Myofibroblasts
TRIR	1.49685e-83	0.603739	0.738	0.527	4.50162e-79	Myofibroblasts
CCL2	1.0656e-82	1.72348	0.509	0.311	3.2047e-78	Myofibroblasts
SLCO3A1	1.19071e-82	0.640941	0.299	0.13	3.58093e-78	Myofibroblasts
BCAM	1.90257e-82	0.987367	0.572	0.423	5.72179e-78	Myofibroblasts
FBLIM1	2.24365e-82	0.649492	0.32	0.152	6.74756e-78	Myofibroblasts
ANXA5	5.7527e-82	0.668758	0.655	0.523	1.73007e-77	Myofibroblasts
HLA-B	1.07567e-80	0.510722	0.911	0.731	3.23496e-76	Myofibroblasts
ESD	1.35451e-79	0.709083	0.541	0.4	4.07355e-75	Myofibroblasts
DNAJB4	2.23231e-78	0.662516	0.445	0.255	6.71346e-74	Myofibroblasts
AHNAK	3.00896e-78	0.700096	0.56	0.372	9.04914e-74	Myofibroblasts
JUND	5.44526e-78	0.823066	0.886	0.816	1.63761e-73	Myofibroblasts
EIF3G	2.40559e-77	0.578782	0.816	0.783	7.23456e-73	Myofibroblasts
TCEAL9	3.57606e-77	0.709208	0.487	0.304	1.07547e-72	Myofibroblasts
CEBPB	1.39277e-76	0.754384	0.65	0.531	4.18862e-72	Myofibroblasts
ATF3	4.05164e-76	1.11535	0.776	0.675	1.21849e-71	Myofibroblasts
MTRNR2L8	2.07993e-74	0.812523	0.652	0.514	6.25518e-70	Myofibroblasts
TBC1D1	3.74684e-74	0.619995	0.311	0.149	1.12683e-69	Myofibroblasts
CHCHD10	1.82507e-73	0.692425	0.757	0.7	5.48873e-69	Myofibroblasts
HSP90AB1	4.40856e-73	0.589288	0.973	0.977	1.32583e-68	Myofibroblasts
PPP1R15A	7.9593e-73	0.639739	0.839	0.795	2.39368e-68	Myofibroblasts
FERMT2	5.83173e-72	0.582454	0.353	0.189	1.75383e-67	Myofibroblasts
AC020916.1	9.42599e-71	0.764058	0.342	0.174	2.83477e-66	Myofibroblasts
DNAJA1	8.87033e-70	0.661266	0.889	0.907	2.66766e-65	Myofibroblasts
FBXO32	1.77034e-69	0.553826	0.296	0.14	5.32411e-65	Myofibroblasts
RHOQ	5.4103e-69	0.554879	0.293	0.142	1.62709e-64	Myofibroblasts
PNRC1	3.55959e-65	0.676127	0.757	0.698	1.07051e-60	Myofibroblasts
ATP5PF	7.8326e-65	0.510809	0.704	0.513	2.35558e-60	Myofibroblasts
IER5L	8.49106e-64	0.985147	0.378	0.23	2.5536e-59	Myofibroblasts
UTRN	7.86522e-63	0.770747	0.434	0.279	2.36538e-58	Myofibroblasts
MYO1C	6.85745e-62	0.693822	0.381	0.233	2.06231e-57	Myofibroblasts
ARHGAP1	7.59825e-62	0.549819	0.297	0.153	2.2851e-57	Myofibroblasts
JUN	2.20248e-60	1.08224	0.871	0.828	6.62373e-56	Myofibroblasts
OPTN	4.46866e-60	0.565907	0.422	0.268	1.3439e-55	Myofibroblasts
ZBTB38	5.15789e-59	0.580112	0.372	0.222	1.55118e-54	Myofibroblasts
CCDC107	8.55706e-59	0.843739	0.511	0.414	2.57345e-54	Myofibroblasts
FADS3	4.23767e-58	0.630803	0.279	0.144	1.27444e-53	Myofibroblasts
LEPROT	1.1267e-57	0.674965	0.495	0.377	3.38843e-53	Myofibroblasts
EGR1	1.13205e-56	0.882894	0.702	0.613	3.40454e-52	Myofibroblasts
ITGAV	1.50415e-55	0.508612	0.346	0.2	4.52357e-51	Myofibroblasts
CLIC4	5.66204e-55	0.508203	0.376	0.227	1.7028e-50	Myofibroblasts
PDLIM2	2.97823e-53	0.568771	0.536	0.4	8.95672e-49	Myofibroblasts
ID1	1.63416e-52	0.817464	0.566	0.433	4.91457e-48	Myofibroblasts
RNASEH2C	3.16552e-52	0.578243	0.679	0.642	9.51997e-48	Myofibroblasts
ZNF703	9.71323e-52	0.620458	0.39	0.259	2.92116e-47	Myofibroblasts
BAG3	2.08937e-51	0.654908	0.53	0.379	6.28357e-47	Myofibroblasts
MYC	1.5555e-48	0.908752	0.451	0.32	4.67801e-44	Myofibroblasts
BST2	2.48317e-48	0.680502	0.513	0.353	7.4679e-44	Myofibroblasts
MCRIP1	9.05868e-48	0.513896	0.509	0.368	2.72431e-43	Myofibroblasts
DNAJB1	9.86331e-48	0.512039	0.909	0.929	2.96629e-43	Myofibroblasts
ARPC5	2.91902e-47	0.642192	0.652	0.641	8.77865e-43	Myofibroblasts
FOS	4.35418e-47	1.02234	0.796	0.772	1.30948e-42	Myofibroblasts
JAK1	1.47434e-44	0.578601	0.473	0.363	4.43394e-40	Myofibroblasts
CYR61	1.79688e-44	0.7638	0.361	0.221	5.40393e-40	Myofibroblasts
ARHGEF7	3.49832e-44	0.525002	0.258	0.142	1.05208e-39	Myofibroblasts
TACC1	5.19539e-44	0.523065	0.417	0.284	1.56246e-39	Myofibroblasts
MYADM	6.21173e-43	0.542775	0.554	0.468	1.86812e-38	Myofibroblasts
HOPX	1.64332e-42	0.527873	0.27	0.145	4.94211e-38	Myofibroblasts
NFIL3	4.59594e-42	0.640734	0.337	0.215	1.38218e-37	Myofibroblasts
WDR1	3.06334e-40	0.594676	0.498	0.427	9.2127e-36	Myofibroblasts
CRTAP	4.91125e-40	0.505803	0.44	0.336	1.47701e-35	Myofibroblasts
MAP4	1.19296e-39	0.589168	0.397	0.294	3.5877e-35	Myofibroblasts
LMO4	1.70564e-39	0.620004	0.628	0.551	5.12954e-35	Myofibroblasts
TENT5A	1.61625e-38	0.510028	0.303	0.178	4.86071e-34	Myofibroblasts
RNH1	6.8522e-38	0.595756	0.551	0.5	2.06073e-33	Myofibroblasts
NR4A1	1.69058e-37	0.794046	0.652	0.629	5.08425e-33	Myofibroblasts
ZYX	5.01946e-37	0.508627	0.399	0.293	1.50955e-32	Myofibroblasts
MAFF	5.86621e-35	0.619109	0.52	0.45	1.7642e-30	Myofibroblasts
CALU	2.82169e-32	0.528519	0.449	0.382	8.48596e-28	Myofibroblasts
OAZ2	1.26756e-30	0.621612	0.553	0.548	3.81207e-26	Myofibroblasts
C12orf75	3.4896e-30	1.04837	0.393	0.315	1.04946e-25	Myofibroblasts
MIR22HG	3.71146e-30	0.509886	0.33	0.229	1.11618e-25	Myofibroblasts
MXRA7	6.77829e-30	0.530457	0.367	0.275	2.0385e-25	Myofibroblasts
OSBPL1A	4.22159e-29	0.551808	0.284	0.195	1.2696e-24	Myofibroblasts
RND3	1.40591e-28	0.523394	0.387	0.291	4.22815e-24	Myofibroblasts
MYO1B	2.15118e-27	0.545211	0.293	0.203	6.46946e-23	Myofibroblasts
PRSS23	1.675e-26	0.573189	0.373	0.281	5.03738e-22	Myofibroblasts
PTEN	3.74247e-26	0.524652	0.379	0.306	1.12551e-21	Myofibroblasts
SBDS	2.1329e-24	0.509433	0.493	0.457	6.41449e-20	Myofibroblasts
ROCK1	4.29113e-23	0.540653	0.427	0.384	1.29052e-18	Myofibroblasts
MACF1	5.59494e-23	0.513435	0.386	0.319	1.68262e-18	Myofibroblasts
CHURC1	1.26045e-22	0.525204	0.506	0.489	3.79069e-18	Myofibroblasts
NT5DC2	1.02106e-21	0.609852	0.367	0.317	3.07074e-17	Myofibroblasts
TUBA1C	2.67394e-21	0.510405	0.46	0.424	8.04162e-17	Myofibroblasts
KLF2	4.57151e-21	0.610717	0.377	0.302	1.37484e-16	Myofibroblasts
HSPA1B	4.1584e-20	0.853941	0.725	0.797	1.2506e-15	Myofibroblasts
DUSP14	7.5907e-19	0.597773	0.338	0.283	2.28283e-14	Myofibroblasts
CCND1	9.88514e-18	0.509803	0.338	0.269	2.97286e-13	Myofibroblasts
HSPA6	9.75302e-15	1.06957	0.39	0.336	2.93312e-10	Myofibroblasts
CLU	4.09117e-09	1.2739	0.433	0.434	0.000123038	Myofibroblasts
ZNF331	6.68429e-06	0.632273	0.309	0.291	0.201023	Myofibroblasts
CXCL2	0.000398557	0.923233	0.349	0.334	1	Myofibroblasts
VWF	0	3.5721	0.901	0.05	0	Endothelial cells
HSPG2	0	3.35267	0.89	0.128	0	Endothelial cells
STC1	0	3.35235	0.514	0.032	0	Endothelial cells
SELE	0	3.12974	0.569	0.035	0	Endothelial cells
CLDN5	0	3.10075	0.761	0.016	0	Endothelial cells
PLVAP	0	3.0628	0.83	0.024	0	Endothelial cells
RAMP2	0	2.99903	0.949	0.18	0	Endothelial cells
A2M	0	2.93143	0.923	0.201	0	Endothelial cells
AQP1	0	2.87189	0.814	0.041	0	Endothelial cells
GNG11	0	2.84092	0.956	0.135	0	Endothelial cells
ACKR1	0	2.83225	0.53	0.025	0	Endothelial cells
PECAM1	0	2.69144	0.896	0.048	0	Endothelial cells
IFI27	0	2.65445	0.992	0.329	0	Endothelial cells
PCAT19	0	2.58514	0.859	0.036	0	Endothelial cells
FLT1	0	2.47262	0.741	0.016	0	Endothelial cells
SPARCL1	0	2.47199	0.944	0.169	0	Endothelial cells
SPARC	0	2.43884	0.902	0.223	0	Endothelial cells
ENG	0	2.42713	0.85	0.107	0	Endothelial cells
RNASE1	0	2.4155	0.925	0.074	0	Endothelial cells
SLC9A3R2	0	2.41487	0.808	0.311	0	Endothelial cells
TM4SF1	0	2.32722	0.958	0.344	0	Endothelial cells
RAMP3	0	2.25478	0.745	0.019	0	Endothelial cells
EMP1	0	2.24297	0.852	0.167	0	Endothelial cells
COL4A1	0	2.22484	0.627	0.127	0	Endothelial cells
IGFBP4	0	2.18769	0.93	0.231	0	Endothelial cells
CD93	0	2.18768	0.791	0.038	0	Endothelial cells
INSR	0	2.16931	0.66	0.221	0	Endothelial cells
CRIP2	0	2.15698	0.946	0.405	0	Endothelial cells
ECSCR	0	2.14234	0.871	0.012	0	Endothelial cells
ESM1	0	2.13348	0.287	0.026	0	Endothelial cells
SOCS3	0	2.07932	0.801	0.334	0	Endothelial cells
COL4A2	0	2.03684	0.647	0.149	0	Endothelial cells
HLA-E	0	2.0263	0.988	0.592	0	Endothelial cells
C2CD4B	0	1.99325	0.62	0.019	0	Endothelial cells
ANGPT2	0	1.99083	0.442	0.084	0	Endothelial cells
ICAM1	0	1.95335	0.794	0.175	0	Endothelial cells
CAV1	0	1.94369	0.82	0.136	0	Endothelial cells
ESAM	0	1.9334	0.761	0.043	0	Endothelial cells
ADGRL4	0	1.92652	0.784	0.008	0	Endothelial cells
VWA1	0	1.89585	0.631	0.214	0	Endothelial cells
FKBP1A	0	1.8927	0.973	0.754	0	Endothelial cells
EPAS1	0	1.89149	0.842	0.177	0	Endothelial cells
TGFBR2	0	1.85504	0.827	0.117	0	Endothelial cells
EMCN	0	1.85217	0.769	0.01	0	Endothelial cells
PODXL	0	1.8404	0.642	0.091	0	Endothelial cells
ENPP2	0	1.82001	0.343	0.026	0	Endothelial cells
VAMP5	0	1.81909	0.892	0.266	0	Endothelial cells
CD34	0	1.81176	0.711	0.02	0	Endothelial cells
SPRY1	0	1.80666	0.736	0.165	0	Endothelial cells
TCF4	0	1.80408	0.873	0.248	0	Endothelial cells
HTRA1	0	1.79454	0.691	0.112	0	Endothelial cells
CALCRL	0	1.77951	0.738	0.019	0	Endothelial cells
VIM	0	1.76769	0.995	0.579	0	Endothelial cells
GJA1	0	1.71816	0.715	0.137	0	Endothelial cells
SPTBN1	0	1.70155	0.847	0.346	0	Endothelial cells
COL15A1	0	1.67553	0.566	0.048	0	Endothelial cells
FAM167B	0	1.67339	0.605	0.017	0	Endothelial cells
IFITM3	0	1.66369	0.996	0.567	0	Endothelial cells
THBD	0	1.65959	0.672	0.059	0	Endothelial cells
BCAM	0	1.65603	0.848	0.406	0	Endothelial cells
TSC22D1	0	1.64461	0.9	0.57	0	Endothelial cells
STOM	0	1.62834	0.812	0.198	0	Endothelial cells
EGFL7	0	1.62637	0.79	0.245	0	Endothelial cells
SERPINE1	0	1.62387	0.465	0.082	0	Endothelial cells
CLEC14A	0	1.60157	0.646	0.005	0	Endothelial cells
RBP7	0	1.56584	0.495	0.035	0	Endothelial cells
PCDH17	0	1.5637	0.623	0.011	0	Endothelial cells
GNAI2	0	1.56363	0.871	0.395	0	Endothelial cells
RCAN1	0	1.55701	0.542	0.127	0	Endothelial cells
NPDC1	0	1.5447	0.935	0.577	0	Endothelial cells
IFITM2	0	1.51742	0.981	0.498	0	Endothelial cells
APP	0	1.51014	0.9	0.498	0	Endothelial cells
EFNB2	0	1.49688	0.633	0.207	0	Endothelial cells
CYYR1	0	1.47112	0.679	0.008	0	Endothelial cells
PTPRB	0	1.46332	0.644	0.018	0	Endothelial cells
ITGA6	0	1.45804	0.673	0.092	0	Endothelial cells
LDB2	0	1.44805	0.679	0.031	0	Endothelial cells
TIMP3	0	1.43429	0.734	0.19	0	Endothelial cells
ADAM15	0	1.43144	0.71	0.282	0	Endothelial cells
CD59	0	1.42638	0.894	0.475	0	Endothelial cells
KCTD12	0	1.4172	0.604	0.102	0	Endothelial cells
PDLIM1	0	1.41241	0.857	0.326	0	Endothelial cells
PRCP	0	1.40981	0.619	0.214	0	Endothelial cells
HEG1	0	1.36876	0.635	0.057	0	Endothelial cells
CXorf36	0	1.36126	0.65	0.007	0	Endothelial cells
MMRN2	0	1.35097	0.597	0.007	0	Endothelial cells
ELK3	0	1.3349	0.676	0.076	0	Endothelial cells
RND1	0	1.33436	0.538	0.048	0	Endothelial cells
YBX3	0	1.33288	0.866	0.417	0	Endothelial cells
SLC2A3	0	1.33238	0.712	0.186	0	Endothelial cells
LIFR	0	1.33062	0.486	0.079	0	Endothelial cells
LAMA4	0	1.32884	0.483	0.091	0	Endothelial cells
PLPP3	0	1.32584	0.578	0.107	0	Endothelial cells
BST2	0	1.3218	0.831	0.334	0	Endothelial cells
ACVRL1	0	1.3199	0.6	0.029	0	Endothelial cells
LMCD1	0	1.31446	0.648	0.106	0	Endothelial cells
CDH5	0	1.30564	0.571	0.004	0	Endothelial cells
ITGA5	0	1.30246	0.54	0.061	0	Endothelial cells
HLA-B	0	1.28843	0.998	0.725	0	Endothelial cells
WWTR1	0	1.28614	0.717	0.164	0	Endothelial cells
ICAM2	0	1.28572	0.535	0.045	0	Endothelial cells
APOLD1	0	1.28339	0.551	0.129	0	Endothelial cells
JAM2	0	1.28071	0.606	0.023	0	Endothelial cells
MSN	0	1.27909	0.753	0.275	0	Endothelial cells
IGFBP7	0	1.27305	0.982	0.444	0	Endothelial cells
SYNPO	0	1.26994	0.563	0.062	0	Endothelial cells
NOTCH4	0	1.26949	0.458	0.042	0	Endothelial cells
HYAL2	0	1.26772	0.6	0.157	0	Endothelial cells
IL6ST	0	1.26606	0.769	0.261	0	Endothelial cells
SLCO2A1	0	1.26001	0.429	0.035	0	Endothelial cells
TMEM88	0	1.25396	0.542	0.061	0	Endothelial cells
SNCG	0	1.23959	0.679	0.131	0	Endothelial cells
MEF2C	0	1.2357	0.719	0.113	0	Endothelial cells
KLF2	0	1.23436	0.715	0.282	0	Endothelial cells
GSN	0	1.22929	0.916	0.384	0	Endothelial cells
PLXND1	0	1.22456	0.617	0.081	0	Endothelial cells
TGM2	0	1.2176	0.664	0.139	0	Endothelial cells
ADAMTS1	0	1.21457	0.567	0.134	0	Endothelial cells
TMSB10	0	1.21436	1	0.997	0	Endothelial cells
ADGRF5	0	1.20771	0.502	0.051	0	Endothelial cells
MCAM	0	1.19999	0.517	0.081	0	Endothelial cells
ADAMTS9	0	1.19754	0.501	0.026	0	Endothelial cells
BMPR2	0	1.19683	0.665	0.172	0	Endothelial cells
MYH9	0	1.19634	0.817	0.381	0	Endothelial cells
LMO2	0	1.1924	0.62	0.033	0	Endothelial cells
VCAM1	0	1.19207	0.363	0.043	0	Endothelial cells
SOX7	0	1.19018	0.515	0.037	0	Endothelial cells
ETS2	0	1.18089	0.738	0.3	0	Endothelial cells
THSD7A	0	1.18051	0.528	0.09	0	Endothelial cells
IL3RA	0	1.18	0.51	0.016	0	Endothelial cells
S100A16	0	1.16035	0.797	0.32	0	Endothelial cells
PALMD	0	1.16024	0.558	0.027	0	Endothelial cells
TIE1	0	1.15237	0.533	0.01	0	Endothelial cells
PTRF	0	1.13942	0.384	0.056	0	Endothelial cells
MMP2	0	1.13514	0.427	0.089	0	Endothelial cells
SWAP70	0	1.12799	0.609	0.112	0	Endothelial cells
LIMS2	0	1.12556	0.562	0.036	0	Endothelial cells
ANXA2	0	1.12394	0.947	0.492	0	Endothelial cells
KDR	0	1.12184	0.47	0.005	0	Endothelial cells
SH3BP5	0	1.10683	0.622	0.129	0	Endothelial cells
ARHGAP29	0	1.08991	0.684	0.227	0	Endothelial cells
TSPAN7	0	1.08242	0.521	0.022	0	Endothelial cells
CCL14	0	1.07766	0.372	0.003	0	Endothelial cells
ICAM4	0	1.07567	0.492	0.032	0	Endothelial cells
NRP1	0	1.06552	0.561	0.109	0	Endothelial cells
NUAK1	0	1.05857	0.548	0.123	0	Endothelial cells
NFIB	0	1.04892	0.786	0.357	0	Endothelial cells
DPYSL2	0	1.03445	0.673	0.203	0	Endothelial cells
TM4SF18	0	1.02638	0.437	0.01	0	Endothelial cells
ECE1	0	1.02547	0.637	0.232	0	Endothelial cells
MTUS1	0	1.02085	0.55	0.106	0	Endothelial cells
ITM2A	0	1.01986	0.618	0.102	0	Endothelial cells
TMEM255B	0	1.016	0.557	0.066	0	Endothelial cells
IL33	0	1.00619	0.451	0.02	0	Endothelial cells
DLC1	0	1.006	0.532	0.066	0	Endothelial cells
TNFRSF10D	0	0.995698	0.513	0.041	0	Endothelial cells
ROBO4	0	0.991471	0.466	0.003	0	Endothelial cells
GUK1	0	0.977599	0.972	0.887	0	Endothelial cells
COX7A1	0	0.97642	0.696	0.144	0	Endothelial cells
SOX17	0	0.974756	0.41	0.003	0	Endothelial cells
ETS1	0	0.959197	0.615	0.137	0	Endothelial cells
SELP	0	0.958786	0.378	0.008	0	Endothelial cells
GIMAP4	0	0.943485	0.534	0.051	0	Endothelial cells
SEMA3F	0	0.934023	0.383	0.062	0	Endothelial cells
ADAMTS4	0	0.932679	0.409	0.046	0	Endothelial cells
FZD4	0	0.926611	0.476	0.028	0	Endothelial cells
GRASP	0	0.920732	0.449	0.058	0	Endothelial cells
NRN1	0	0.916724	0.504	0.129	0	Endothelial cells
JAG2	0	0.911902	0.365	0.072	0	Endothelial cells
CRIM1	0	0.911637	0.512	0.09	0	Endothelial cells
FAM107A	0	0.904457	0.442	0.03	0	Endothelial cells
CLIC4	0	0.895066	0.615	0.213	0	Endothelial cells
NNMT	0	0.885888	0.652	0.184	0	Endothelial cells
ERG	0	0.88501	0.485	0.021	0	Endothelial cells
GRB10	0	0.87897	0.43	0.08	0	Endothelial cells
PREX2	0	0.873171	0.39	0.013	0	Endothelial cells
CLEC2B	0	0.870952	0.665	0.166	0	Endothelial cells
CDA	0	0.868085	0.45	0.015	0	Endothelial cells
IFI44L	0	0.859343	0.478	0.11	0	Endothelial cells
RASIP1	0	0.856631	0.396	0.01	0	Endothelial cells
CD200	0	0.856021	0.436	0.024	0	Endothelial cells
NOSTRIN	0	0.855789	0.417	0.017	0	Endothelial cells
GIMAP7	0	0.845568	0.462	0.048	0	Endothelial cells
MALL	0	0.843141	0.479	0.048	0	Endothelial cells
TGFBR3	0	0.840443	0.456	0.06	0	Endothelial cells
CAV2	0	0.83792	0.539	0.098	0	Endothelial cells
RAPGEF5	0	0.837186	0.395	0.049	0	Endothelial cells
ENTPD1	0	0.836239	0.472	0.055	0	Endothelial cells
TMEM204	0	0.834217	0.442	0.057	0	Endothelial cells
ACKR3	0	0.833893	0.307	0.029	0	Endothelial cells
ABCG2	0	0.829321	0.347	0.007	0	Endothelial cells
SDPR	0	0.829155	0.299	0.007	0	Endothelial cells
F2R	0	0.827212	0.459	0.085	0	Endothelial cells
LRRC32	0	0.825997	0.458	0.053	0	Endothelial cells
ABLIM1	0	0.824384	0.492	0.092	0	Endothelial cells
PTPRM	0	0.82369	0.463	0.042	0	Endothelial cells
TFPI	0	0.818897	0.464	0.072	0	Endothelial cells
KLF9	0	0.809885	0.572	0.171	0	Endothelial cells
GFOD1	0	0.809318	0.485	0.077	0	Endothelial cells
CDC42EP5	0	0.803391	0.485	0.09	0	Endothelial cells
RPS6KA2	0	0.798364	0.446	0.07	0	Endothelial cells
ADCY4	0	0.797951	0.431	0.009	0	Endothelial cells
KANK3	0	0.791948	0.399	0.01	0	Endothelial cells
HDAC7	0	0.791057	0.529	0.152	0	Endothelial cells
NES	0	0.789943	0.403	0.06	0	Endothelial cells
GIMAP6	0	0.789458	0.442	0.015	0	Endothelial cells
IFI16	0	0.789354	0.61	0.178	0	Endothelial cells
RHOJ	0	0.787683	0.415	0.02	0	Endothelial cells
ZEB1	0	0.787227	0.472	0.072	0	Endothelial cells
GIMAP1	0	0.782588	0.466	0.04	0	Endothelial cells
MYCT1	0	0.78027	0.429	0.003	0	Endothelial cells
FILIP1	0	0.778696	0.3	0.029	0	Endothelial cells
STAB1	0	0.77423	0.398	0.047	0	Endothelial cells
FOXC1	0	0.771719	0.457	0.072	0	Endothelial cells
S1PR1	0	0.76864	0.417	0.015	0	Endothelial cells
VASH1	0	0.766881	0.342	0.052	0	Endothelial cells
SULF2	0	0.763022	0.437	0.076	0	Endothelial cells
SEMA6B	0	0.761369	0.361	0.048	0	Endothelial cells
ACE	0	0.760339	0.27	0.034	0	Endothelial cells
EDNRB	0	0.758564	0.253	0.02	0	Endothelial cells
DOCK9	0	0.750197	0.431	0.052	0	Endothelial cells
TSPAN18	0	0.749101	0.365	0.006	0	Endothelial cells
KCNN3	0	0.745496	0.289	0.017	0	Endothelial cells
ZNF385D	0	0.736458	0.347	0.014	0	Endothelial cells
CDH13	0	0.735015	0.283	0.023	0	Endothelial cells
MECOM	0	0.725895	0.351	0.031	0	Endothelial cells
IPO11	0	0.719942	0.403	0.043	0	Endothelial cells
GBP4	0	0.707891	0.428	0.074	0	Endothelial cells
BCL6B	0	0.703001	0.334	0.003	0	Endothelial cells
FGD5	0	0.6921	0.405	0.015	0	Endothelial cells
DCHS1	0	0.691043	0.36	0.017	0	Endothelial cells
ITGB4	0	0.689738	0.388	0.066	0	Endothelial cells
LEPR	0	0.686018	0.357	0.038	0	Endothelial cells
CCDC69	0	0.685467	0.41	0.048	0	Endothelial cells
ARL15	0	0.685033	0.298	0.045	0	Endothelial cells
TMTC1	0	0.68156	0.369	0.028	0	Endothelial cells
PPM1F	0	0.680056	0.408	0.061	0	Endothelial cells
MCTP1	0	0.678095	0.345	0.034	0	Endothelial cells
DOCK6	0	0.674779	0.353	0.053	0	Endothelial cells
INHBB	0	0.661168	0.278	0.04	0	Endothelial cells
EHD2	0	0.659207	0.439	0.082	0	Endothelial cells
DYSF	0	0.655359	0.294	0.011	0	Endothelial cells
JCAD	0	0.644796	0.264	0.019	0	Endothelial cells
PTPRG	0	0.642892	0.348	0.059	0	Endothelial cells
NDST1	0	0.640566	0.378	0.075	0	Endothelial cells
SHANK3	0	0.638964	0.357	0.009	0	Endothelial cells
F8	0	0.63436	0.31	0.051	0	Endothelial cells
VEGFC	0	0.625445	0.275	0.013	0	Endothelial cells
HHEX	0	0.621197	0.345	0.037	0	Endothelial cells
DAB2	0	0.619789	0.475	0.109	0	Endothelial cells
PRKCH	0	0.617113	0.456	0.085	0	Endothelial cells
RBP5	0	0.610807	0.308	0.01	0	Endothelial cells
SOX18	0	0.600792	0.294	0.015	0	Endothelial cells
NID1	0	0.592675	0.317	0.051	0	Endothelial cells
TEK	0	0.587607	0.332	0.003	0	Endothelial cells
HOXD9	0	0.586876	0.278	0.014	0	Endothelial cells
AKR1C3	0	0.579131	0.336	0.043	0	Endothelial cells
TNS2	0	0.572764	0.38	0.066	0	Endothelial cells
AFAP1L1	0	0.569957	0.258	0.004	0	Endothelial cells
HSPA12B	0	0.568461	0.292	0.01	0	Endothelial cells
FLT4	0	0.56425	0.263	0.003	0	Endothelial cells
ARHGEF15	0	0.556475	0.287	0.003	0	Endothelial cells
TCF7L1	0	0.542634	0.312	0.044	0	Endothelial cells
SHE	0	0.530741	0.315	0.008	0	Endothelial cells
ARHGAP31	0	0.530204	0.302	0.018	0	Endothelial cells
TMCC3	0	0.52692	0.319	0.038	0	Endothelial cells
FLI1	0	0.525628	0.337	0.027	0	Endothelial cells
PLEKHG1	0	0.525554	0.318	0.027	0	Endothelial cells
SHROOM4	0	0.525379	0.28	0.008	0	Endothelial cells
ZNF521	0	0.522228	0.317	0.015	0	Endothelial cells
FAM110D	0	0.508969	0.253	0.006	0	Endothelial cells
HLA-DRB1	6.43455e-308	0.67246	0.719	0.264	1.93513e-303	Endothelial cells
CSGALNACT1	4.87524e-306	0.570648	0.315	0.053	1.46618e-301	Endothelial cells
EHD4	5.00715e-305	0.790447	0.483	0.132	1.50585e-300	Endothelial cells
RASGRP3	1.31263e-304	0.503465	0.258	0.035	3.9476e-300	Endothelial cells
KLF7	1.98012e-302	0.687187	0.469	0.123	5.95501e-298	Endothelial cells
NOTCH1	3.31266e-302	0.704313	0.411	0.094	9.96248e-298	Endothelial cells
CCDC85B	1.58173e-301	1.22715	0.954	0.73	4.75688e-297	Endothelial cells
HLA-C	9.22901e-301	1.0677	0.996	0.742	2.77553e-296	Endothelial cells
PKP4	6.30801e-296	0.811568	0.517	0.162	1.89707e-291	Endothelial cells
TNFSF10	3.23185e-290	0.848062	0.603	0.199	9.71947e-286	Endothelial cells
SHC1	8.34503e-290	0.870918	0.592	0.216	2.50968e-285	Endothelial cells
SEC14L1	8.33055e-289	1.15821	0.637	0.264	2.50533e-284	Endothelial cells
DUSP6	2.05963e-286	0.966303	0.568	0.187	6.19413e-282	Endothelial cells
TRIOBP	1.84151e-285	0.852985	0.602	0.227	5.53817e-281	Endothelial cells
ITPRIP	2.51502e-284	0.68772	0.352	0.071	7.56368e-280	Endothelial cells
SERTAD4-AS1	1.01254e-281	0.552689	0.377	0.079	3.04512e-277	Endothelial cells
SNTB2	1.99466e-280	0.682557	0.47	0.133	5.99874e-276	Endothelial cells
PLCB1	9.28893e-279	0.533276	0.309	0.057	2.79355e-274	Endothelial cells
LAMB2	2.08045e-278	0.739221	0.499	0.143	6.25674e-274	Endothelial cells
PXN	5.50325e-278	0.662234	0.449	0.122	1.65505e-273	Endothelial cells
MGST2	1.50983e-277	1.01236	0.731	0.372	4.54067e-273	Endothelial cells
FSTL1	1.17971e-276	0.740602	0.579	0.174	3.54786e-272	Endothelial cells
SLFN5	9.6967e-276	0.684142	0.465	0.127	2.91619e-271	Endothelial cells
PHACTR2	1.52612e-275	0.76871	0.551	0.184	4.58965e-271	Endothelial cells
RGS3	4.947e-275	1.22717	0.395	0.096	1.48776e-270	Endothelial cells
FRMD4B	3.21927e-274	0.576447	0.433	0.109	9.68162e-270	Endothelial cells
CMIP	6.64173e-274	0.706684	0.511	0.162	1.99743e-269	Endothelial cells
RAI14	1.13656e-270	0.610514	0.363	0.081	3.41809e-266	Endothelial cells
EPHB4	1.29098e-270	0.619131	0.387	0.093	3.8825e-266	Endothelial cells
ANGPTL2	1.34579e-270	0.673796	0.259	0.04	4.04733e-266	Endothelial cells
S100A13	2.72541e-267	0.91739	0.886	0.486	8.19641e-263	Endothelial cells
ABL2	1.26927e-266	1.16776	0.623	0.253	3.81719e-262	Endothelial cells
PLK2	1.45011e-266	0.883955	0.543	0.182	4.36105e-262	Endothelial cells
ITGA1	7.54473e-266	0.766128	0.36	0.077	2.269e-261	Endothelial cells
PTPN14	1.71517e-265	0.640823	0.4	0.099	5.15819e-261	Endothelial cells
TSHZ2	2.73519e-264	0.85586	0.568	0.195	8.22581e-260	Endothelial cells
CDKN1A	4.32468e-264	1.39498	0.885	0.619	1.3006e-259	Endothelial cells
FXYD5	5.25191e-264	0.774742	0.887	0.452	1.57946e-259	Endothelial cells
RBMS2	6.28158e-263	0.546931	0.383	0.091	1.88912e-258	Endothelial cells
LY96	2.54417e-261	0.596011	0.456	0.119	7.65135e-257	Endothelial cells
TAGLN2	1.1914e-260	0.993404	0.95	0.624	3.58301e-256	Endothelial cells
FAM198B	2.00601e-260	0.861571	0.562	0.203	6.03287e-256	Endothelial cells
PRSS23	6.90555e-258	1.05244	0.653	0.264	2.07678e-253	Endothelial cells
NFKBIA	1.14291e-256	0.907794	0.952	0.77	3.43719e-252	Endothelial cells
PLEC	4.39428e-256	0.925291	0.619	0.253	1.32153e-251	Endothelial cells
HLA-DRB5	2.01272e-255	0.72592	0.574	0.187	6.05305e-251	Endothelial cells
TINAGL1	7.10454e-253	0.644285	0.486	0.143	2.13662e-248	Endothelial cells
KIAA0355	7.44856e-253	0.789584	0.558	0.212	2.24008e-248	Endothelial cells
PIK3R3	1.82965e-252	0.720624	0.428	0.123	5.5025e-248	Endothelial cells
RALB	5.27022e-252	0.614935	0.445	0.125	1.58497e-247	Endothelial cells
RHOC	1.34015e-248	1.07015	0.872	0.551	4.03036e-244	Endothelial cells
DGKH	1.49603e-248	0.515875	0.296	0.057	4.49915e-244	Endothelial cells
LAMB1	3.16633e-248	0.709102	0.337	0.074	9.52243e-244	Endothelial cells
ADGRG1	5.53147e-248	0.690946	0.431	0.123	1.66353e-243	Endothelial cells
TMEM173	6.53347e-248	0.681268	0.544	0.18	1.96488e-243	Endothelial cells
ITM2B	1.27842e-247	0.922232	0.967	0.805	3.84472e-243	Endothelial cells
AHNAK	8.4808e-247	0.92586	0.745	0.36	2.55052e-242	Endothelial cells
ADIRF	8.31959e-246	1.26453	0.72	0.346	2.50203e-241	Endothelial cells
CD74	1.98866e-243	0.978562	0.838	0.545	5.98071e-239	Endothelial cells
HAPLN3	7.31546e-242	0.54106	0.327	0.068	2.20005e-237	Endothelial cells
CAVIN1	3.4004e-241	1.31765	0.507	0.176	1.02264e-236	Endothelial cells
UPP1	9.57831e-241	0.862105	0.584	0.224	2.88058e-236	Endothelial cells
MKL2	2.12272e-240	0.575323	0.389	0.102	6.38387e-236	Endothelial cells
ITGB1	2.58168e-240	1.24855	0.852	0.578	7.76415e-236	Endothelial cells
AP1S2	7.29556e-240	0.780701	0.617	0.255	2.19407e-235	Endothelial cells
FBN1	7.21941e-239	0.531604	0.34	0.073	2.17117e-234	Endothelial cells
FOSB	5.95545e-238	1.15431	0.942	0.807	1.79104e-233	Endothelial cells
NCOA7	3.42133e-237	1.0243	0.679	0.319	1.02893e-232	Endothelial cells
ZFP36L1	1.26082e-236	1.08421	0.877	0.552	3.79179e-232	Endothelial cells
IFITM1	8.4438e-234	0.698959	0.498	0.155	2.53939e-229	Endothelial cells
BAG3	1.0496e-233	0.973628	0.755	0.365	3.15658e-229	Endothelial cells
LGALS9	2.4384e-233	0.563939	0.446	0.123	7.33324e-229	Endothelial cells
LPAR6	3.21731e-230	0.642296	0.448	0.135	9.67573e-226	Endothelial cells
ARPC1B	4.45642e-229	0.874225	0.778	0.414	1.34022e-224	Endothelial cells
IRF1	3.33643e-227	1.29045	0.766	0.446	1.0034e-222	Endothelial cells
LMNA	5.13036e-227	1.03198	0.924	0.661	1.54291e-222	Endothelial cells
COL18A1	1.45189e-226	1.07083	0.623	0.252	4.36643e-222	Endothelial cells
PLS3	3.79574e-226	0.568849	0.403	0.108	1.14153e-221	Endothelial cells
QKI	9.45596e-226	0.714737	0.582	0.231	2.84378e-221	Endothelial cells
SSFA2	5.44149e-225	0.71476	0.507	0.183	1.63647e-220	Endothelial cells
MSX1	1.422e-224	0.925748	0.446	0.144	4.27653e-220	Endothelial cells
SNRK	3.44202e-224	0.587406	0.393	0.109	1.03515e-219	Endothelial cells
GNAQ	7.34715e-223	0.84087	0.655	0.322	2.20958e-218	Endothelial cells
IGFBP3	2.30808e-222	2.67922	0.442	0.145	6.94131e-218	Endothelial cells
CDC37	1.53768e-221	0.930148	0.828	0.574	4.62442e-217	Endothelial cells
AGRN	2.01757e-221	0.793706	0.436	0.139	6.06765e-217	Endothelial cells
SPRY4	2.16539e-220	0.58473	0.305	0.068	6.51219e-216	Endothelial cells
PIK3C2A	7.37336e-220	0.681755	0.477	0.167	2.21746e-215	Endothelial cells
NDRG1	1.34859e-219	0.90859	0.742	0.398	4.05576e-215	Endothelial cells
MIDN	7.9594e-219	1.10233	0.804	0.547	2.39371e-214	Endothelial cells
FKBP9	9.38559e-219	0.711719	0.487	0.171	2.82262e-214	Endothelial cells
PTGDS	1.05821e-218	0.748658	0.291	0.06	3.18246e-214	Endothelial cells
FAM171A1	7.98778e-216	0.512353	0.318	0.076	2.40225e-211	Endothelial cells
HLA-DMA	3.82334e-215	0.646184	0.554	0.198	1.14983e-210	Endothelial cells
TACC1	1.14897e-214	0.759388	0.626	0.272	3.4554e-210	Endothelial cells
TJP1	3.68989e-214	0.777225	0.584	0.26	1.1097e-209	Endothelial cells
CARD8	5.9141e-214	0.575813	0.405	0.119	1.77861e-209	Endothelial cells
PLXNA2	8.72929e-214	0.506242	0.278	0.058	2.62525e-209	Endothelial cells
TPM4	9.27929e-214	0.796456	0.848	0.478	2.79065e-209	Endothelial cells
CFLAR	1.1503e-213	0.766594	0.69	0.343	3.4594e-209	Endothelial cells
TIFA	3.79987e-213	0.553889	0.403	0.118	1.14277e-208	Endothelial cells
CAVIN3	1.95378e-212	0.898147	0.428	0.122	5.87579e-208	Endothelial cells
PPFIBP1	4.65975e-212	0.589418	0.434	0.136	1.40137e-207	Endothelial cells
UACA	2.58841e-211	0.696452	0.419	0.125	7.78438e-207	Endothelial cells
FYN	2.89851e-211	0.574158	0.472	0.149	8.71699e-207	Endothelial cells
ARRDC3	1.74763e-209	0.77767	0.571	0.233	5.25583e-205	Endothelial cells
MIR222HG	7.03595e-208	0.536421	0.4	0.111	2.11599e-203	Endothelial cells
PNP	7.75367e-208	0.989561	0.567	0.248	2.33184e-203	Endothelial cells
DDX3X	5.08591e-207	0.934527	0.784	0.509	1.52954e-202	Endothelial cells
ID1	7.62877e-205	1.25093	0.762	0.422	2.29427e-200	Endothelial cells
UTRN	2.45254e-203	0.879254	0.61	0.268	7.37577e-199	Endothelial cells
MEIS2	8.25291e-203	0.539697	0.373	0.1	2.48198e-198	Endothelial cells
HIPK3	2.98644e-201	0.575346	0.448	0.15	8.98141e-197	Endothelial cells
TCN2	3.89646e-200	0.549944	0.367	0.103	1.17182e-195	Endothelial cells
LAMA5	8.31886e-200	0.574529	0.38	0.112	2.50181e-195	Endothelial cells
RBPMS	1.58149e-198	0.524002	0.488	0.167	4.75617e-194	Endothelial cells
ATP1A1	3.45015e-197	0.905748	0.794	0.509	1.0376e-192	Endothelial cells
NFIA	1.45788e-196	0.684225	0.599	0.259	4.38444e-192	Endothelial cells
PARP14	4.20751e-195	0.66348	0.485	0.174	1.26537e-190	Endothelial cells
ACTN4	9.39628e-195	0.942988	0.753	0.45	2.82584e-190	Endothelial cells
HLA-A	1.11853e-194	0.705573	0.995	0.733	3.36386e-190	Endothelial cells
C4orf32	2.8014e-194	0.5192	0.262	0.057	8.42492e-190	Endothelial cells
DNAJB4	2.16719e-192	0.713725	0.596	0.246	6.51762e-188	Endothelial cells
XAF1	2.8691e-192	0.524901	0.345	0.091	8.62855e-188	Endothelial cells
GAS6	8.33978e-191	0.67168	0.538	0.211	2.50811e-186	Endothelial cells
CAVIN2	5.83364e-190	0.820883	0.294	0.07	1.75441e-185	Endothelial cells
CD99	1.15514e-188	0.731926	0.916	0.702	3.47396e-184	Endothelial cells
TPM3	1.77363e-186	0.799246	0.865	0.657	5.33403e-182	Endothelial cells
JUNB	3.62827e-186	0.987889	0.951	0.876	1.09117e-181	Endothelial cells
TIMP2	5.06231e-186	0.600562	0.689	0.324	1.52244e-181	Endothelial cells
ANKRD28	8.46974e-186	0.627338	0.429	0.147	2.54719e-181	Endothelial cells
IER3	4.47014e-185	0.59298	0.811	0.448	1.34435e-180	Endothelial cells
MAP3K11	2.93352e-184	0.702043	0.542	0.246	8.82226e-180	Endothelial cells
TCIM	4.64533e-184	0.993409	0.333	0.092	1.39704e-179	Endothelial cells
DUSP23	1.579e-182	1.1372	0.689	0.424	4.74868e-178	Endothelial cells
CNN3	3.7342e-181	0.757293	0.699	0.344	1.12302e-176	Endothelial cells
MAPK3	1.00836e-180	0.672265	0.472	0.186	3.03255e-176	Endothelial cells
RDX	3.72991e-180	0.907885	0.719	0.447	1.12173e-175	Endothelial cells
RBMS1	6.04013e-180	0.592998	0.549	0.228	1.81651e-175	Endothelial cells
JAG1	1.06649e-179	0.633494	0.419	0.139	3.20737e-175	Endothelial cells
ATP2B4	4.87131e-179	0.523094	0.382	0.117	1.465e-174	Endothelial cells
MYL12A	1.14868e-176	0.758356	0.91	0.765	3.45453e-172	Endothelial cells
MTRNR2L8	1.08328e-174	0.998394	0.797	0.505	3.25784e-170	Endothelial cells
SLC44A2	1.17026e-174	0.683997	0.468	0.185	3.51943e-170	Endothelial cells
B2M	4.60967e-174	0.553358	0.999	0.949	1.38631e-169	Endothelial cells
CXCL2	1.2356e-173	0.876822	0.656	0.315	3.71595e-169	Endothelial cells
CX3CL1	1.61272e-172	0.621095	0.39	0.126	4.8501e-168	Endothelial cells
C1orf54	2.24511e-172	0.631774	0.479	0.17	6.75196e-168	Endothelial cells
MACF1	6.01715e-172	0.847805	0.6	0.306	1.8096e-167	Endothelial cells
ASAP1	1.59508e-171	0.619493	0.475	0.194	4.79705e-167	Endothelial cells
TGFB1	3.04481e-171	0.77807	0.521	0.203	9.15697e-167	Endothelial cells
SASH1	3.36139e-171	0.575615	0.408	0.143	1.0109e-166	Endothelial cells
NFAT5	6.53399e-170	0.595155	0.518	0.218	1.96503e-165	Endothelial cells
RAB13	1.13404e-169	0.86226	0.86	0.621	3.41052e-165	Endothelial cells
PTPN12	6.27712e-169	0.673736	0.524	0.235	1.88778e-164	Endothelial cells
PICALM	2.65713e-168	0.6189	0.5	0.212	7.99105e-164	Endothelial cells
MBNL2	8.30765e-168	0.565242	0.427	0.151	2.49844e-163	Endothelial cells
PRDM1	1.27394e-165	0.60995	0.329	0.094	3.83124e-161	Endothelial cells
KLF4	1.89322e-165	1.21033	0.654	0.391	5.69367e-161	Endothelial cells
OLFM1	3.29549e-164	0.600527	0.337	0.105	9.91087e-160	Endothelial cells
S100A10	3.56669e-164	0.742377	0.946	0.725	1.07265e-159	Endothelial cells
NRP2	3.81428e-164	0.605773	0.393	0.127	1.14711e-159	Endothelial cells
MAGI1	8.1597e-163	0.533761	0.363	0.12	2.45395e-158	Endothelial cells
CTNNA1	1.40829e-162	0.718261	0.575	0.285	4.23528e-158	Endothelial cells
RAPGEF1	2.11677e-162	0.605943	0.357	0.115	6.36598e-158	Endothelial cells
TPST2	4.26516e-162	0.505175	0.406	0.142	1.2827e-157	Endothelial cells
FSCN1	9.19084e-162	0.84271	0.576	0.267	2.76405e-157	Endothelial cells
WASF2	3.7005e-158	0.735846	0.782	0.561	1.11289e-153	Endothelial cells
DUSP5	2.06901e-157	0.55145	0.49	0.201	6.22234e-153	Endothelial cells
MGLL	5.7816e-156	0.682391	0.5	0.211	1.73876e-151	Endothelial cells
PEA15	4.72766e-154	0.765961	0.684	0.412	1.4218e-149	Endothelial cells
TMSB4X	1.81616e-152	0.678249	0.998	0.956	5.46193e-148	Endothelial cells
TXNIP	6.34729e-152	1.11111	0.673	0.41	1.90888e-147	Endothelial cells
FCGRT	1.49678e-151	0.608445	0.82	0.56	4.50143e-147	Endothelial cells
CCL2	1.85568e-150	0.644321	0.621	0.304	5.58076e-146	Endothelial cells
HEY1	3.71103e-150	1.13105	0.306	0.095	1.11605e-145	Endothelial cells
MBNL1	3.8138e-149	0.632085	0.643	0.358	1.14696e-144	Endothelial cells
PDK4	1.15052e-148	0.508778	0.361	0.119	3.46007e-144	Endothelial cells
HES1	2.17025e-147	0.81131	0.794	0.467	6.5268e-143	Endothelial cells
HSPA1A	3.38693e-147	0.767484	0.979	0.774	1.01859e-142	Endothelial cells
TMEM109	3.55435e-147	0.574792	0.51	0.232	1.06894e-142	Endothelial cells
PINK1	6.87676e-147	0.795538	0.476	0.217	2.06812e-142	Endothelial cells
YPEL2	3.67107e-146	0.654291	0.446	0.186	1.10404e-141	Endothelial cells
CTNNB1	4.28128e-146	0.787183	0.704	0.424	1.28755e-141	Endothelial cells
ZC3HAV1	7.07865e-145	0.659975	0.602	0.313	2.12883e-140	Endothelial cells
CYB5R3	2.4207e-144	0.7628	0.73	0.482	7.28002e-140	Endothelial cells
PPP1R15A	2.04325e-141	0.660722	0.914	0.791	6.14487e-137	Endothelial cells
EIF4G2	5.60581e-141	0.791869	0.864	0.708	1.68589e-136	Endothelial cells
CALM1	2.08851e-140	0.940892	0.961	0.88	6.28098e-136	Endothelial cells
SAV1	4.48545e-140	0.668741	0.505	0.24	1.34895e-135	Endothelial cells
RHOA	7.15484e-140	0.615746	0.9	0.764	2.15175e-135	Endothelial cells
SHISA5	1.18071e-139	0.653909	0.605	0.341	3.55088e-135	Endothelial cells
IER5	1.52138e-139	0.7144	0.648	0.381	4.5754e-135	Endothelial cells
BHLHE40	2.01863e-139	0.536726	0.559	0.255	6.07084e-135	Endothelial cells
LEPROT	2.36906e-139	0.633422	0.632	0.369	7.12471e-135	Endothelial cells
SERPINH1	6.16887e-139	0.621062	0.678	0.375	1.85523e-134	Endothelial cells
PSMB8	2.2221e-138	0.595848	0.653	0.344	6.68274e-134	Endothelial cells
MAST4	9.26891e-138	0.617044	0.477	0.202	2.78753e-133	Endothelial cells
SERINC3	3.69692e-137	0.624873	0.581	0.318	1.11181e-132	Endothelial cells
INSIG1	3.76969e-137	0.593352	0.646	0.367	1.1337e-132	Endothelial cells
PLEKHA1	1.02837e-136	0.534892	0.396	0.156	3.09273e-132	Endothelial cells
TMOD3	8.27777e-136	0.61045	0.529	0.265	2.48946e-131	Endothelial cells
ARL2	4.61622e-135	0.649851	0.747	0.519	1.38828e-130	Endothelial cells
FLNB	4.9214e-135	0.66928	0.504	0.247	1.48006e-130	Endothelial cells
FEZ2	2.28702e-134	0.517186	0.451	0.195	6.87798e-130	Endothelial cells
PXDN	2.44223e-133	0.759705	0.333	0.117	7.34477e-129	Endothelial cells
RPS6KA3	1.52437e-132	0.507673	0.407	0.165	4.58438e-128	Endothelial cells
SRP14	5.45167e-132	0.820324	0.988	0.961	1.63954e-127	Endothelial cells
GRN	6.78038e-132	0.700428	0.734	0.489	2.03913e-127	Endothelial cells
LUZP1	9.17857e-132	0.623446	0.581	0.313	2.76036e-127	Endothelial cells
SYNE2	4.12537e-131	0.639903	0.515	0.245	1.24066e-126	Endothelial cells
MEF2A	5.24148e-131	0.560227	0.426	0.181	1.57632e-126	Endothelial cells
THBS1	3.43395e-130	0.544828	0.426	0.165	1.03273e-125	Endothelial cells
PLAT	4.34986e-130	0.619536	0.39	0.144	1.30818e-125	Endothelial cells
ARL5B	1.44977e-129	0.535847	0.465	0.21	4.36003e-125	Endothelial cells
FOSL2	3.39412e-129	0.609335	0.648	0.371	1.02075e-124	Endothelial cells
MYO1C	4.45415e-129	0.629495	0.482	0.227	1.33954e-124	Endothelial cells
LRRFIP1	6.48063e-129	0.609078	0.703	0.445	1.94898e-124	Endothelial cells
SELENON	2.38167e-128	0.780255	0.354	0.138	7.16263e-124	Endothelial cells
FRYL	1.44325e-127	0.538449	0.416	0.177	4.34043e-123	Endothelial cells
CSRNP1	9.31354e-127	0.604487	0.591	0.326	2.80095e-122	Endothelial cells
SERTAD1	1.27529e-126	0.889648	0.816	0.629	3.83531e-122	Endothelial cells
CREBRF	3.26091e-126	0.519568	0.48	0.221	9.80687e-122	Endothelial cells
ARGLU1	2.01797e-125	0.712259	0.778	0.561	6.06884e-121	Endothelial cells
CAPNS1	3.75707e-125	0.663995	0.706	0.49	1.1299e-120	Endothelial cells
FAM43A	1.43312e-124	0.550392	0.505	0.226	4.30997e-120	Endothelial cells
TNFRSF4	6.41754e-124	0.81926	0.32	0.109	1.93001e-119	Endothelial cells
TNFAIP3	4.13038e-123	0.711371	0.646	0.35	1.24217e-118	Endothelial cells
EFCAB14	4.42402e-123	0.679355	0.472	0.227	1.33048e-118	Endothelial cells
FLNA	1.23602e-121	0.65789	0.654	0.389	3.71722e-117	Endothelial cells
MAP4	4.21891e-121	0.679987	0.531	0.286	1.26879e-116	Endothelial cells
HBEGF	2.18838e-120	0.759746	0.538	0.284	6.58132e-116	Endothelial cells
NUCB1	2.88038e-120	0.58745	0.675	0.436	8.66244e-116	Endothelial cells
NEDD9	5.65884e-120	0.619973	0.586	0.319	1.70184e-115	Endothelial cells
LRRC8A	2.74578e-118	0.516183	0.419	0.186	8.25766e-114	Endothelial cells
SDCBP	5.29607e-118	0.625185	0.79	0.6	1.59274e-113	Endothelial cells
DDX17	1.88607e-117	0.638694	0.798	0.623	5.67217e-113	Endothelial cells
PTPRE	7.87979e-117	0.553637	0.373	0.146	2.36977e-112	Endothelial cells
RILPL2	1.9553e-116	0.554885	0.484	0.225	5.88036e-112	Endothelial cells
APLP2	2.77774e-116	0.83292	0.726	0.521	8.35377e-112	Endothelial cells
ITPKC	4.40227e-116	0.515363	0.346	0.133	1.32394e-111	Endothelial cells
CNKSR3	7.65899e-115	0.508075	0.408	0.176	2.30337e-110	Endothelial cells
BCL3	8.67732e-114	0.591493	0.507	0.254	2.60962e-109	Endothelial cells
YES1	2.85423e-113	0.523941	0.383	0.167	8.58381e-109	Endothelial cells
JMJD1C	6.9245e-113	0.819849	0.643	0.428	2.08247e-108	Endothelial cells
WSB1	1.79326e-112	0.608782	0.729	0.517	5.39306e-108	Endothelial cells
UGCG	1.26174e-111	0.587027	0.456	0.222	3.79455e-107	Endothelial cells
TRIM56	1.5599e-111	0.51618	0.485	0.248	4.69123e-107	Endothelial cells
CLU	3.41722e-111	1.41696	0.637	0.422	1.0277e-106	Endothelial cells
EFNA1	1.13034e-109	1.25122	0.549	0.33	3.3994e-105	Endothelial cells
THY1	1.97143e-108	0.558511	0.317	0.109	5.92888e-104	Endothelial cells
SNX3	6.36088e-108	0.558065	0.857	0.696	1.91297e-103	Endothelial cells
LIMS1	6.41354e-108	0.599088	0.595	0.356	1.92881e-103	Endothelial cells
MIR4435-2HG	2.60995e-107	1.10434	0.455	0.23	7.84918e-103	Endothelial cells
LAMC1	1.03603e-106	0.612488	0.461	0.232	3.11576e-102	Endothelial cells
PKIG	1.30538e-106	0.626552	0.551	0.309	3.92581e-102	Endothelial cells
EMP2	4.44188e-105	0.501033	0.607	0.345	1.33585e-100	Endothelial cells
PCGF2	6.48843e-105	0.52923	0.479	0.25	1.95133e-100	Endothelial cells
CRK	8.49646e-105	0.547743	0.539	0.317	2.55522e-100	Endothelial cells
JAK1	2.78923e-104	0.608771	0.596	0.356	8.38832e-100	Endothelial cells
LDLR	4.30446e-104	0.51904	0.387	0.17	1.29452e-99	Endothelial cells
LIMCH1	4.60214e-104	0.589829	0.465	0.236	1.38405e-99	Endothelial cells
MYO10	8.15049e-104	0.577205	0.324	0.13	2.45118e-99	Endothelial cells
NEAT1	2.45224e-103	0.659828	0.979	0.866	7.37487e-99	Endothelial cells
ARID5A	1.18204e-102	0.60779	0.512	0.266	3.55487e-98	Endothelial cells
KMT2E	1.45359e-102	0.577948	0.699	0.499	4.37153e-98	Endothelial cells
GNAS	2.07062e-102	0.840071	0.913	0.79	6.22719e-98	Endothelial cells
GADD45B	3.77614e-102	0.640029	0.835	0.659	1.13564e-97	Endothelial cells
RGL2	1.1299e-101	0.510531	0.515	0.29	3.39806e-97	Endothelial cells
CYR61	3.50848e-101	0.604636	0.456	0.216	1.05514e-96	Endothelial cells
PTTG1IP	2.70963e-100	0.58424	0.726	0.512	8.14894e-96	Endothelial cells
CAST	2.99452e-99	0.529761	0.724	0.489	9.0057e-95	Endothelial cells
KTN1	4.39215e-98	0.551051	0.865	0.726	1.32089e-93	Endothelial cells
GNG5	2.46939e-97	0.504191	0.882	0.756	7.42644e-93	Endothelial cells
CD81	8.62114e-97	0.874606	0.843	0.628	2.59272e-92	Endothelial cells
BRI3	4.76879e-96	0.541779	0.836	0.673	1.43417e-91	Endothelial cells
VAT1	1.10235e-95	0.60299	0.531	0.312	3.31521e-91	Endothelial cells
GNB1	4.10821e-95	0.625861	0.666	0.484	1.2355e-90	Endothelial cells
IL1R1	6.97543e-95	0.540745	0.387	0.184	2.09779e-90	Endothelial cells
CEBPD	4.55777e-94	0.824526	0.688	0.516	1.3707e-89	Endothelial cells
NCKAP1	5.85161e-94	0.512265	0.459	0.249	1.75981e-89	Endothelial cells
CD151	1.09402e-93	0.558035	0.764	0.573	3.29017e-89	Endothelial cells
SLC38A2	2.40798e-93	0.658926	0.745	0.577	7.24175e-89	Endothelial cells
TAPBP	8.90085e-92	0.574647	0.658	0.438	2.67684e-87	Endothelial cells
CYTOR	2.10169e-91	1.14269	0.435	0.219	6.32064e-87	Endothelial cells
ARHGEF12	6.00589e-91	0.510941	0.457	0.246	1.80621e-86	Endothelial cells
ADD1	6.65272e-90	0.556664	0.471	0.264	2.00074e-85	Endothelial cells
SPTAN1	1.15428e-89	0.580239	0.577	0.368	3.47137e-85	Endothelial cells
UBE2J1	2.22649e-89	0.689105	0.512	0.312	6.69594e-85	Endothelial cells
ZFP36	4.2432e-88	0.703687	0.821	0.688	1.2761e-83	Endothelial cells
MYL12B	4.32522e-88	0.606083	0.919	0.848	1.30077e-83	Endothelial cells
MTRNR2L12	1.78536e-87	0.742146	0.814	0.633	5.3693e-83	Endothelial cells
RAB11A	3.60129e-86	0.54738	0.705	0.533	1.08305e-81	Endothelial cells
CTNNAL1	2.71872e-85	0.570035	0.469	0.272	8.17629e-81	Endothelial cells
IQGAP1	6.93366e-83	0.539275	0.637	0.448	2.08523e-78	Endothelial cells
ARL4A	3.39003e-81	0.58111	0.622	0.412	1.01952e-76	Endothelial cells
SH3GLB1	1.20393e-80	0.543397	0.616	0.43	3.62069e-76	Endothelial cells
PLPP1	6.16836e-80	0.770012	0.455	0.248	1.85507e-75	Endothelial cells
CDC42EP3	2.1016e-79	0.535614	0.576	0.365	6.32035e-75	Endothelial cells
SQSTM1	2.72563e-79	0.595219	0.884	0.768	8.19705e-75	Endothelial cells
KDM6B	7.58695e-79	0.575467	0.665	0.479	2.2817e-74	Endothelial cells
RGCC	1.99772e-77	0.6188	0.513	0.275	6.00794e-73	Endothelial cells
UNC5B	2.00765e-77	0.642769	0.285	0.122	6.03781e-73	Endothelial cells
AC020916.1	8.35097e-77	0.810968	0.353	0.174	2.51147e-72	Endothelial cells
NFKBIZ	2.70581e-75	0.610546	0.547	0.361	8.13745e-71	Endothelial cells
PCMTD1	1.17945e-74	0.517466	0.485	0.294	3.54709e-70	Endothelial cells
MYLIP	4.59248e-74	0.506019	0.602	0.41	1.38114e-69	Endothelial cells
KLF6	1.18602e-73	0.679251	0.841	0.723	3.56683e-69	Endothelial cells
AKAP13	1.61722e-73	0.57644	0.573	0.37	4.86363e-69	Endothelial cells
HSPH1	1.62198e-73	0.505073	0.881	0.793	4.87793e-69	Endothelial cells
WARS	4.38371e-73	0.504724	0.385	0.203	1.31836e-68	Endothelial cells
MAP4K4	2.38416e-72	0.572723	0.476	0.296	7.17013e-68	Endothelial cells
HEXIM1	7.952e-72	0.591564	0.495	0.31	2.39148e-67	Endothelial cells
NR2F2	1.00964e-69	0.522697	0.535	0.346	3.03639e-65	Endothelial cells
SYNJ2	1.07241e-67	0.561937	0.288	0.135	3.22517e-63	Endothelial cells
ABHD17A	1.26792e-67	0.556633	0.533	0.361	3.81314e-63	Endothelial cells
SERPINB6	6.38896e-63	0.503738	0.72	0.541	1.92141e-58	Endothelial cells
NECTIN2	1.85383e-62	0.658195	0.388	0.231	5.57522e-58	Endothelial cells
SAT1	7.19342e-61	0.970118	0.962	0.889	2.16335e-56	Endothelial cells
YWHAH	2.41424e-57	0.633029	0.635	0.485	7.26058e-53	Endothelial cells
PTP4A3	1.38396e-54	0.763678	0.423	0.279	4.16213e-50	Endothelial cells
SEPW1	1.19259e-49	0.987355	0.423	0.301	3.5866e-45	Endothelial cells
CITED4	8.95988e-40	0.605223	0.297	0.177	2.69459e-35	Endothelial cells
IVNS1ABP	1.35621e-38	0.616428	0.502	0.37	4.07867e-34	Endothelial cells
GLTSCR2	1.6642e-38	0.827185	0.427	0.321	5.00491e-34	Endothelial cells
OAZ2	4.26549e-35	0.595266	0.63	0.543	1.2828e-30	Endothelial cells
SELENOW	1.75007e-25	0.774053	0.549	0.537	5.26316e-21	Endothelial cells
MTRNR2L1	1.42604e-20	0.657324	0.281	0.2	4.28868e-16	Endothelial cells
NBEAL1	1.96101e-18	0.593669	0.505	0.477	5.89754e-14	Endothelial cells
TP53I11	1.39065e-14	0.548977	0.289	0.233	4.18225e-10	Endothelial cells
HES4	5.5007e-10	0.589131	0.475	0.457	1.65428e-05	Endothelial cells
CCL3	0	5.25582	0.869	0.155	0	Macrophages
APOE	0	5.05249	0.842	0.227	0	Macrophages
APOC1	0	4.93505	0.859	0.201	0	Macrophages
C1QB	0	4.91071	0.914	0.08	0	Macrophages
C1QA	0	4.86099	0.927	0.083	0	Macrophages
C1QC	0	4.24473	0.899	0.05	0	Macrophages
LYZ	0	4.23974	0.95	0.104	0	Macrophages
HLA-DRA	0	4.15715	0.998	0.367	0	Macrophages
CCL3L1	0	4.14289	0.53	0.027	0	Macrophages
CCL4L2	0	3.94494	0.698	0.112	0	Macrophages
CCL4	0	3.91111	0.838	0.211	0	Macrophages
TYROBP	0	3.86677	1	0.182	0	Macrophages
CD74	0	3.84388	1	0.544	0	Macrophages
HLA-DPA1	0	3.82373	0.99	0.266	0	Macrophages
HLA-DRB1	0	3.78245	0.979	0.263	0	Macrophages
IL1B	0	3.75213	0.746	0.071	0	Macrophages
HLA-DPB1	0	3.65168	0.992	0.322	0	Macrophages
AIF1	0	3.48103	0.983	0.085	0	Macrophages
FTL	0	3.45134	1	0.997	0	Macrophages
HLA-DQA1	0	3.29045	0.933	0.114	0	Macrophages
CTSB	0	3.25399	0.984	0.403	0	Macrophages
CTSD	0	3.18742	0.956	0.562	0	Macrophages
PSAP	0	3.06949	0.998	0.733	0	Macrophages
HLA-DQB1	0	3.03015	0.939	0.153	0	Macrophages
FCER1G	0	3.01554	0.984	0.137	0	Macrophages
CXCL8	0	2.96657	0.903	0.346	0	Macrophages
CD68	0	2.92094	0.951	0.111	0	Macrophages
HLA-DRB5	0	2.91929	0.943	0.181	0	Macrophages
MS4A6A	0	2.91078	0.925	0.042	0	Macrophages
MS4A7	0	2.79656	0.892	0.047	0	Macrophages
CXCL3	0	2.7467	0.754	0.208	0	Macrophages
CD14	0	2.62868	0.795	0.034	0	Macrophages
FCGR2A	0	2.61613	0.892	0.054	0	Macrophages
FCGR3A	0	2.60808	0.827	0.028	0	Macrophages
PLAUR	0	2.57748	0.875	0.207	0	Macrophages
CTSZ	0	2.54352	0.947	0.419	0	Macrophages
HLA-DMA	0	2.54187	0.939	0.19	0	Macrophages
CTSS	0	2.52571	0.937	0.149	0	Macrophages
RNASE1	0	2.50398	0.52	0.107	0	Macrophages
BCL2A1	0	2.47827	0.783	0.106	0	Macrophages
LST1	0	2.4721	0.932	0.076	0	Macrophages
GPR183	0	2.39987	0.81	0.11	0	Macrophages
GRN	0	2.38469	0.952	0.485	0	Macrophages
LAPTM5	0	2.37244	0.979	0.244	0	Macrophages
CXCL2	0	2.33061	0.833	0.315	0	Macrophages
HLA-DMB	0	2.31827	0.853	0.067	0	Macrophages
C15orf48	0	2.30733	0.735	0.083	0	Macrophages
SOD2	0	2.29532	0.943	0.48	0	Macrophages
NPC2	0	2.26892	0.995	0.67	0	Macrophages
HMOX1	0	2.2558	0.74	0.097	0	Macrophages
CST3	0	2.2515	0.998	0.822	0	Macrophages
CYBA	0	2.2451	0.983	0.449	0	Macrophages
CTSL	0	2.22545	0.853	0.29	0	Macrophages
IER3	0	2.20259	0.957	0.449	0	Macrophages
PLEK	0	2.19822	0.805	0.037	0	Macrophages
LGMN	0	2.17053	0.723	0.193	0	Macrophages
TMEM176B	0	2.16636	0.855	0.196	0	Macrophages
GPNMB	0	2.16535	0.627	0.082	0	Macrophages
C5AR1	0	2.15184	0.796	0.039	0	Macrophages
CCL20	0	2.12275	0.385	0.055	0	Macrophages
CD83	0	2.05924	0.89	0.244	0	Macrophages
S100A9	0	2.05314	0.513	0.068	0	Macrophages
TYMP	0	2.03343	0.924	0.354	0	Macrophages
CTSC	0	2.00477	0.834	0.182	0	Macrophages
FCGRT	0	1.98676	0.949	0.56	0	Macrophages
CAPG	0	1.96941	0.813	0.184	0	Macrophages
ITGB2	0	1.95618	0.874	0.099	0	Macrophages
SAT1	0	1.9165	0.998	0.889	0	Macrophages
LITAF	0	1.87537	0.937	0.514	0	Macrophages
NAMPT	0	1.82864	0.896	0.416	0	Macrophages
SRGN	0	1.7966	0.993	0.403	0	Macrophages
FOLR2	0	1.76991	0.497	0.014	0	Macrophages
SPI1	0	1.75542	0.795	0.055	0	Macrophages
SDS	0	1.74083	0.488	0.016	0	Macrophages
MSR1	0	1.73593	0.686	0.012	0	Macrophages
CSF1R	0	1.73391	0.742	0.022	0	Macrophages
MS4A4A	0	1.73192	0.721	0.015	0	Macrophages
EREG	0	1.72987	0.304	0.025	0	Macrophages
SERPINA1	0	1.72968	0.716	0.045	0	Macrophages
FGL2	0	1.68865	0.745	0.055	0	Macrophages
HLA-DQA2	0	1.68539	0.641	0.056	0	Macrophages
MMP9	0	1.67424	0.527	0.069	0	Macrophages
NINJ1	0	1.65098	0.874	0.453	0	Macrophages
CD163	0	1.6481	0.623	0.014	0	Macrophages
F13A1	0	1.63984	0.447	0.023	0	Macrophages
RNASE6	0	1.6183	0.729	0.029	0	Macrophages
RNASET2	0	1.61384	0.895	0.488	0	Macrophages
FTH1	0	1.61355	1	0.999	0	Macrophages
PLTP	0	1.61209	0.606	0.129	0	Macrophages
CYBB	0	1.60682	0.72	0.02	0	Macrophages
CFLAR	0	1.57488	0.833	0.345	0	Macrophages
LIPA	0	1.57211	0.655	0.124	0	Macrophages
TNFSF13B	0	1.57185	0.737	0.064	0	Macrophages
SLCO2B1	0	1.56831	0.645	0.019	0	Macrophages
TMSB4X	0	1.56237	0.999	0.957	0	Macrophages
VAMP8	0	1.53507	0.935	0.462	0	Macrophages
RGS1	0	1.52373	0.835	0.237	0	Macrophages
LILRB4	0	1.52341	0.67	0.017	0	Macrophages
C1orf162	0	1.52326	0.725	0.064	0	Macrophages
DAB2	0	1.51031	0.678	0.108	0	Macrophages
KCTD12	0	1.49581	0.747	0.107	0	Macrophages
TREM2	0	1.49353	0.554	0.01	0	Macrophages
LY96	0	1.46678	0.784	0.113	0	Macrophages
CD4	0	1.46421	0.721	0.045	0	Macrophages
IGSF6	0	1.44699	0.564	0.014	0	Macrophages
RNF130	0	1.44571	0.822	0.349	0	Macrophages
VSIG4	0	1.41318	0.541	0.009	0	Macrophages
LAIR1	0	1.41214	0.686	0.036	0	Macrophages
CXCL16	0	1.37653	0.781	0.215	0	Macrophages
OLR1	0	1.35485	0.463	0.017	0	Macrophages
ACP5	0	1.34957	0.564	0.085	0	Macrophages
FYB1	0	1.34892	0.637	0.07	0	Macrophages
TPP1	0	1.34821	0.793	0.238	0	Macrophages
STAB1	0	1.32056	0.531	0.049	0	Macrophages
MGAT1	0	1.31695	0.797	0.312	0	Macrophages
RASSF4	0	1.31243	0.632	0.077	0	Macrophages
AC020656.1	0	1.30983	0.431	0.015	0	Macrophages
FPR3	0	1.29306	0.601	0.011	0	Macrophages
MFSD1	0	1.28847	0.713	0.177	0	Macrophages
PYCARD	0	1.2663	0.823	0.297	0	Macrophages
ADA2	0	1.24432	0.57	0.021	0	Macrophages
TGFBI	0	1.24342	0.699	0.111	0	Macrophages
AKR1B1	0	1.23811	0.662	0.144	0	Macrophages
TMEM176A	0	1.23006	0.786	0.197	0	Macrophages
MAP3K8	0	1.19246	0.686	0.185	0	Macrophages
MMP19	0	1.18603	0.416	0.03	0	Macrophages
CLEC7A	0	1.18078	0.641	0.018	0	Macrophages
FCGR1A	0	1.17142	0.533	0.011	0	Macrophages
TNFRSF1B	0	1.15908	0.637	0.09	0	Macrophages
MPEG1	0	1.15782	0.556	0.014	0	Macrophages
GM2A	0	1.14256	0.56	0.074	0	Macrophages
CSTA	0	1.13308	0.567	0.067	0	Macrophages
PHACTR1	0	1.11864	0.574	0.074	0	Macrophages
LY86	0	1.11674	0.589	0.021	0	Macrophages
CPVL	0	1.11213	0.535	0.037	0	Macrophages
LCP2	0	1.11106	0.606	0.05	0	Macrophages
RAB20	0	1.10542	0.546	0.077	0	Macrophages
GPR34	0	1.1033	0.468	0.016	0	Macrophages
CCRL2	0	1.0858	0.511	0.03	0	Macrophages
IL18	0	1.08071	0.578	0.064	0	Macrophages
PLAU	0	1.07224	0.482	0.09	0	Macrophages
HCLS1	0	1.06998	0.636	0.091	0	Macrophages
CD53	0	1.06157	0.72	0.109	0	Macrophages
LGALS9	0	1.0583	0.621	0.123	0	Macrophages
IL1RN	0	1.03981	0.345	0.031	0	Macrophages
IL10	0	1.03202	0.34	0.011	0	Macrophages
SLC15A3	0	1.03082	0.508	0.031	0	Macrophages
ITGAX	0	1.02115	0.541	0.025	0	Macrophages
NRP2	0	1.01675	0.593	0.125	0	Macrophages
MIR155HG	0	1.01368	0.419	0.051	0	Macrophages
GPSM3	0	1.00962	0.718	0.166	0	Macrophages
CD84	0	1.00876	0.533	0.032	0	Macrophages
C3AR1	0	1.00719	0.497	0.016	0	Macrophages
RASGEF1B	0	1.00139	0.513	0.088	0	Macrophages
NLRP3	0	0.998604	0.365	0.015	0	Macrophages
MNDA	0	0.990576	0.462	0.014	0	Macrophages
PLA2G7	0	0.989201	0.403	0.037	0	Macrophages
MRC1	0	0.989173	0.379	0.01	0	Macrophages
C2	0	0.987787	0.441	0.041	0	Macrophages
HAMP	0	0.966727	0.258	0.01	0	Macrophages
PILRA	0	0.966241	0.517	0.02	0	Macrophages
ADAP2	0	0.959335	0.491	0.04	0	Macrophages
RAB31	0	0.953644	0.626	0.134	0	Macrophages
ARRB2	0	0.953365	0.648	0.179	0	Macrophages
SAMHD1	0	0.953193	0.592	0.124	0	Macrophages
ZEB2	0	0.953079	0.613	0.121	0	Macrophages
NPL	0	0.950409	0.492	0.035	0	Macrophages
ADAMDEC1	0	0.946161	0.355	0.004	0	Macrophages
DSE	0	0.933414	0.498	0.081	0	Macrophages
STX11	0	0.9334	0.546	0.095	0	Macrophages
HLA-DOA	0	0.927098	0.474	0.029	0	Macrophages
PLXDC2	0	0.926995	0.541	0.092	0	Macrophages
OTOA	0	0.917017	0.341	0.008	0	Macrophages
ATP6V1B2	0	0.916311	0.577	0.119	0	Macrophages
CD86	0	0.910563	0.508	0.014	0	Macrophages
FCGR2B	0	0.906059	0.353	0.017	0	Macrophages
SLC1A3	0	0.90594	0.458	0.018	0	Macrophages
SERPINB9	0	0.905766	0.512	0.099	0	Macrophages
ABCA1	0	0.898906	0.494	0.071	0	Macrophages
AXL	0	0.871398	0.504	0.086	0	Macrophages
LYN	0	0.857734	0.531	0.104	0	Macrophages
THEMIS2	0	0.829157	0.483	0.043	0	Macrophages
OSM	0	0.815921	0.294	0.025	0	Macrophages
SLC7A7	0	0.815809	0.463	0.016	0	Macrophages
SLAMF8	0	0.81007	0.409	0.009	0	Macrophages
IL10RA	0	0.80687	0.501	0.067	0	Macrophages
FPR1	0	0.806159	0.416	0.01	0	Macrophages
CPM	0	0.79327	0.467	0.062	0	Macrophages
NCF1	0	0.783312	0.481	0.076	0	Macrophages
HAVCR2	0	0.758061	0.45	0.041	0	Macrophages
GAL3ST4	0	0.753739	0.377	0.019	0	Macrophages
IFI30	0	0.746383	0.392	0.046	0	Macrophages
BMP2K	0	0.737267	0.431	0.066	0	Macrophages
PTPRC	0	0.734586	0.657	0.133	0	Macrophages
HCK	0	0.729277	0.413	0.016	0	Macrophages
LHFPL2	0	0.725698	0.428	0.059	0	Macrophages
SIRPA	0	0.721695	0.435	0.055	0	Macrophages
TFEC	0	0.721361	0.406	0.008	0	Macrophages
LGALS2	0	0.718879	0.258	0.015	0	Macrophages
CD72	0	0.715392	0.386	0.017	0	Macrophages
IRF8	0	0.714699	0.422	0.049	0	Macrophages
NCF4	0	0.713434	0.455	0.051	0	Macrophages
CSF2RA	0	0.71177	0.396	0.012	0	Macrophages
LILRB2	0	0.700255	0.39	0.01	0	Macrophages
TAGAP	0	0.678522	0.39	0.055	0	Macrophages
NCKAP1L	0	0.676512	0.426	0.031	0	Macrophages
EVI2B	0	0.676444	0.484	0.083	0	Macrophages
SLC31A2	0	0.654438	0.393	0.055	0	Macrophages
ST3GAL6	0	0.647029	0.334	0.029	0	Macrophages
IL2RA	0	0.640723	0.265	0.015	0	Macrophages
TLR4	0	0.639684	0.357	0.044	0	Macrophages
EPB41L3	0	0.639413	0.363	0.027	0	Macrophages
NCF2	0	0.629133	0.363	0.013	0	Macrophages
PLXNC1	0	0.617866	0.381	0.028	0	Macrophages
KMO	0	0.616703	0.284	0.009	0	Macrophages
PLBD1	0	0.609442	0.399	0.044	0	Macrophages
CALHM6	0	0.607577	0.312	0.013	0	Macrophages
CASP1	0	0.606661	0.458	0.069	0	Macrophages
BCAT1	0	0.605666	0.323	0.024	0	Macrophages
KYNU	0	0.596691	0.349	0.015	0	Macrophages
PIK3AP1	0	0.596473	0.351	0.025	0	Macrophages
FERMT3	0	0.588293	0.424	0.063	0	Macrophages
ADAM28	0	0.579613	0.342	0.024	0	Macrophages
LILRB3	0	0.574902	0.344	0.029	0	Macrophages
CD300A	0	0.567384	0.343	0.021	0	Macrophages
SIGLEC1	0	0.566865	0.267	0.004	0	Macrophages
IL4I1	0	0.559605	0.263	0.014	0	Macrophages
WAS	0	0.53757	0.393	0.055	0	Macrophages
ITGAM	0	0.53355	0.299	0.018	0	Macrophages
ALOX5	0	0.531638	0.379	0.052	0	Macrophages
CSF3R	0	0.531525	0.304	0.012	0	Macrophages
SIGLEC10	0	0.52359	0.287	0.015	0	Macrophages
AOAH	0	0.523201	0.3	0.012	0	Macrophages
TLR2	0	0.519824	0.28	0.01	0	Macrophages
TM6SF1	0	0.517261	0.306	0.019	0	Macrophages
CCR1	0	0.515169	0.256	0.005	0	Macrophages
MYO1F	0	0.501731	0.351	0.046	0	Macrophages
MARCH1	0	0.50036	0.297	0.009	0	Macrophages
SGK1	5.95852e-306	1.67566	0.775	0.3	1.79197e-301	Macrophages
RB1	3.13618e-299	0.934802	0.561	0.135	9.43176e-295	Macrophages
CREG1	5.18953e-299	1.50343	0.764	0.325	1.5607e-294	Macrophages
NR4A3	1.38416e-298	1.36759	0.688	0.211	4.16272e-294	Macrophages
HCST	4.54863e-298	1.03968	0.739	0.21	1.36795e-293	Macrophages
SLC16A10	5.48573e-296	0.828059	0.35	0.052	1.64978e-291	Macrophages
HNMT	7.84593e-296	0.869197	0.591	0.147	2.35958e-291	Macrophages
SH2B3	1.89007e-295	0.621464	0.378	0.057	5.6842e-291	Macrophages
CFD	4.58548e-295	1.09281	0.701	0.229	1.37904e-290	Macrophages
CTSH	1.24978e-293	1.4598	0.805	0.362	3.75857e-289	Macrophages
LAT2	2.22398e-293	0.605811	0.41	0.066	6.6884e-289	Macrophages
JAML	5.55404e-293	0.511886	0.287	0.032	1.67032e-288	Macrophages
ASAH1	2.0049e-292	1.55782	0.841	0.413	6.02954e-288	Macrophages
GMFG	2.5392e-292	0.853761	0.731	0.198	7.63638e-288	Macrophages
EMILIN2	2.86416e-292	0.503057	0.305	0.038	8.61368e-288	Macrophages
RGS10	7.69785e-292	1.31152	0.882	0.411	2.31505e-287	Macrophages
OGFRL1	2.40887e-290	0.739868	0.438	0.083	7.24443e-286	Macrophages
[truncated: 1,177 more rows]

## Sheet: Topmarkers
gene	p_val	avg_log2FC	pct.1	pct.2	p_val_adj	cluster
APOD	0	5.92614	0.751	0.257	0	Fibroblasts
COL1A1	0	4.35103	0.889	0.151	0	Fibroblasts
MGP	0	4.22402	0.968	0.56	0	Fibroblasts
DCN	0	4.18192	0.904	0.108	0	Fibroblasts
TIMP1	0	4.16967	0.984	0.551	0	Fibroblasts
COL1A2	0	3.97911	0.932	0.131	0	Fibroblasts
CXCL14	0	3.96718	0.51	0.05	0	Fibroblasts
LUM	0	3.7918	0.866	0.081	0	Fibroblasts
IGFBP6	0	3.63657	0.825	0.121	0	Fibroblasts
COL3A1	0	3.59816	0.852	0.109	0	Fibroblasts
IGFBP5	0	3.5564	0.819	0.146	0	Fibroblasts
IGFBP7	0	3.34894	0.975	0.429	0	Fibroblasts
SFRP4	0	3.17448	0.615	0.038	0	Fibroblasts
GSN	0	3.11947	0.913	0.368	0	Fibroblasts
SFRP2	0	3.0898	0.538	0.031	0	Fibroblasts
FBLN1	0	3.04626	0.773	0.18	0	Fibroblasts
RARRES2	0	3.0248	0.885	0.159	0	Fibroblasts
BGN	0	3.00522	0.873	0.164	0	Fibroblasts
LGALS1	0	2.75456	0.986	0.604	0	Fibroblasts
CTGF	0	2.58876	0.708	0.126	0	Fibroblasts
SERPINF1	0	2.50984	0.753	0.119	0	Fibroblasts
SPARC	0	2.44518	0.887	0.204	0	Fibroblasts
C1S	0	2.44479	0.858	0.087	0	Fibroblasts
CTHRC1	0	2.38616	0.687	0.117	0	Fibroblasts
C1R	0	2.37543	0.844	0.125	0	Fibroblasts
FN1	0	2.35553	0.804	0.229	0	Fibroblasts
CCDC80	0	2.348	0.666	0.078	0	Fibroblasts
COL6A2	0	2.32773	0.87	0.168	0	Fibroblasts
IGFBP4	0	2.28721	0.896	0.213	0	Fibroblasts
AEBP1	0	2.23936	0.768	0.092	0	Fibroblasts
POSTN	0	2.22278	0.471	0.039	0	Fibroblasts
PTN	0	2.20186	0.549	0.049	0	Fibroblasts
COL6A3	0	2.12434	0.714	0.049	0	Fibroblasts
PCOLCE	0	2.09175	0.78	0.119	0	Fibroblasts
COMP	0	2.08746	0.319	0.021	0	Fibroblasts
CALD1	0	2.01907	0.943	0.485	0	Fibroblasts
FSTL1	0	2.0115	0.778	0.144	0	Fibroblasts
VCAN	0	1.99155	0.695	0.049	0	Fibroblasts
PLAC9	0	1.98099	0.72	0.121	0	Fibroblasts
SERPING1	0	1.97398	0.879	0.207	0	Fibroblasts
ISLR	0	1.96305	0.675	0.031	0	Fibroblasts
LTBP4	0	1.9525	0.751	0.132	0	Fibroblasts
COL8A1	0	1.87186	0.662	0.03	0	Fibroblasts
NNMT	0	1.85427	0.784	0.157	0	Fibroblasts
INHBA	0	1.83945	0.593	0.071	0	Fibroblasts
GEM	0	1.83589	0.621	0.152	0	Fibroblasts
SELENOM	0	1.82896	0.768	0.293	0	Fibroblasts
IFITM3	0	1.81414	0.977	0.556	0	Fibroblasts
MFAP4	0	1.80879	0.606	0.061	0	Fibroblasts
CTSK	0	1.80006	0.697	0.048	0	Fibroblasts
COL6A1	0	1.79275	0.741	0.146	0	Fibroblasts
SULF1	0	1.78433	0.597	0.059	0	Fibroblasts
CST3	0	1.77374	0.991	0.813	0	Fibroblasts
CRYAB	0	1.73776	0.64	0.175	0	Fibroblasts
MXRA8	0	1.73382	0.736	0.073	0	Fibroblasts
THY1	0	1.69855	0.685	0.069	0	Fibroblasts
TIMP3	0	1.68501	0.602	0.186	0	Fibroblasts
TIMP2	0	1.68225	0.836	0.299	0	Fibroblasts
MFAP5	0	1.65008	0.3	0.015	0	Fibroblasts
C3	0	1.62775	0.352	0.082	0	Fibroblasts
TPM2	0	1.61934	0.833	0.196	0	Fibroblasts
MEG3	0	1.6019	0.644	0.065	0	Fibroblasts
SOD3	0	1.6017	0.67	0.124	0	Fibroblasts
PRELP	0	1.57961	0.537	0.035	0	Fibroblasts
TAGLN	0	1.56642	0.816	0.222	0	Fibroblasts
THBS2	0	1.55016	0.544	0.027	0	Fibroblasts
THBS4	0	1.54541	0.27	0.025	0	Fibroblasts
NR2F1	0	1.52258	0.571	0.067	0	Fibroblasts
LRP1	0	1.49193	0.697	0.11	0	Fibroblasts
MMP2	0	1.47636	0.519	0.07	0	Fibroblasts
CYGB	0	1.47159	0.591	0.044	0	Fibroblasts
DIO2	0	1.46939	0.462	0.045	0	Fibroblasts
AGT	0	1.46515	0.357	0.055	0	Fibroblasts
C11orf96	0	1.43426	0.711	0.267	0	Fibroblasts
COX7A1	0	1.40004	0.741	0.124	0	Fibroblasts
PRRX1	0	1.38213	0.637	0.049	0	Fibroblasts
VIM	0	1.37911	0.989	0.567	0	Fibroblasts
COL5A1	0	1.37797	0.545	0.038	0	Fibroblasts
SERPINE2	0	1.36994	0.507	0.054	0	Fibroblasts
PMP22	0	1.36815	0.674	0.149	0	Fibroblasts
MFGE8	0	1.36474	0.731	0.197	0	Fibroblasts
MYL9	0	1.34371	0.828	0.237	0	Fibroblasts
HCFC1R1	0	1.33229	0.767	0.438	0	Fibroblasts
EFEMP2	0	1.32998	0.669	0.102	0	Fibroblasts
LGALS3BP	0	1.31883	0.766	0.282	0	Fibroblasts
EFEMP1	0	1.31232	0.432	0.033	0	Fibroblasts
SERPINH1	0	1.31119	0.753	0.359	0	Fibroblasts
GGT5	0	1.30385	0.518	0.057	0	Fibroblasts
ITM2B	0	1.30073	0.965	0.8	0	Fibroblasts
FXYD1	0	1.29793	0.456	0.105	0	Fibroblasts
DKK3	0	1.28383	0.614	0.069	0	Fibroblasts
CD99	0	1.2813	0.918	0.696	0	Fibroblasts
CD63	0	1.27815	0.984	0.893	0	Fibroblasts
ASPN	0	1.26876	0.434	0.027	0	Fibroblasts
COL14A1	0	1.26522	0.364	0.041	0	Fibroblasts
PPIC	0	1.25363	0.663	0.226	0	Fibroblasts
HTRA3	0	1.25084	0.416	0.022	0	Fibroblasts
FHL2	0	1.24789	0.583	0.158	0	Fibroblasts
COL5A2	0	1.22656	0.536	0.051	0	Fibroblasts
ITGBL1	0	1.21619	0.343	0.007	0	Fibroblasts
TGFBI	0	1.20511	0.509	0.098	0	Fibroblasts
CAVIN3	0	1.20437	0.612	0.096	0	Fibroblasts
F2R	0	1.20278	0.45	0.074	0	Fibroblasts
CFH	0	1.20075	0.421	0.058	0	Fibroblasts
SSPN	0	1.19439	0.576	0.078	0	Fibroblasts
FBN1	0	1.19361	0.483	0.052	0	Fibroblasts
LTBP2	0	1.18461	0.498	0.034	0	Fibroblasts
CYR61	0	1.17215	0.564	0.199	0	Fibroblasts
ANXA5	0	1.17202	0.844	0.501	0	Fibroblasts
COL4A2	0	1.17029	0.644	0.134	0	Fibroblasts
S100A13	0	1.15336	0.824	0.479	0	Fibroblasts
S100A6	0	1.14441	0.989	0.738	0	Fibroblasts
CDH11	0	1.13473	0.523	0.031	0	Fibroblasts
PDLIM7	0	1.13468	0.624	0.194	0	Fibroblasts
CYBRD1	0	1.13333	0.578	0.117	0	Fibroblasts
C2orf40	0	1.12581	0.288	0.042	0	Fibroblasts
OLFML3	0	1.10595	0.505	0.041	0	Fibroblasts
CNN3	0	1.10519	0.743	0.33	0	Fibroblasts
ELN	0	1.10463	0.479	0.05	0	Fibroblasts
PALLD	0	1.09884	0.579	0.157	0	Fibroblasts
EMILIN1	0	1.09181	0.483	0.031	0	Fibroblasts
ANXA2	0	1.08409	0.878	0.485	0	Fibroblasts
PDLIM2	0	1.07908	0.741	0.377	0	Fibroblasts
PDGFRB	0	1.05245	0.576	0.061	0	Fibroblasts
CTSC	0	1.04743	0.543	0.176	0	Fibroblasts
LGALS3	0	1.03258	0.835	0.377	0	Fibroblasts
PDLIM3	0	1.02983	0.489	0.071	0	Fibroblasts
MRC2	0	1.02106	0.497	0.041	0	Fibroblasts
TSPAN4	0	1.0196	0.59	0.201	0	Fibroblasts
RAB34	0	1.00963	0.675	0.242	0	Fibroblasts
AKAP12	0	1.0082	0.523	0.123	0	Fibroblasts
PDLIM4	0	1.00375	0.56	0.185	0	Fibroblasts
CSRP1	6.75358e-300	1.02839	0.649	0.318	2.03107e-295	Fibroblasts
TCEAL9	1.50125e-295	1.01039	0.625	0.286	4.51487e-291	Fibroblasts
MT2A	9.16585e-295	1.28786	0.944	0.772	2.75654e-290	Fibroblasts
NBL1	2.85762e-291	1.0573	0.724	0.363	8.59401e-287	Fibroblasts
CST1	3.45635e-283	2.82548	0.372	0.105	1.03946e-278	Fibroblasts
MTRNR2L8	2.73416e-279	1.26856	0.77	0.499	8.22271e-275	Fibroblasts
SFRP1	7.00746e-248	1.3408	0.261	0.059	2.10742e-243	Fibroblasts
CCL2	8.51391e-227	1.73037	0.601	0.297	2.56047e-222	Fibroblasts
TPM1	1.63439e-203	1.16316	0.797	0.631	4.91528e-199	Fibroblasts
CFD	4.15502e-96	2.88264	0.398	0.233	1.24958e-91	Fibroblasts
KLK3	0	2.03064	0.6	0.196	0	Epithelial cells
KRT18	0	1.96766	0.964	0.316	0	Epithelial cells
TFF3	0	1.94646	0.618	0.288	0	Epithelial cells
CLDN4	0	1.85223	0.898	0.264	0	Epithelial cells
KRT8	0	1.82792	0.954	0.321	0	Epithelial cells
AR	0	1.76183	0.654	0.267	0	Epithelial cells
CKB	0	1.73781	0.743	0.272	0	Epithelial cells
KRT19	0	1.7182	0.477	0.184	0	Epithelial cells
AGR2	0	1.67302	0.344	0.065	0	Epithelial cells
ELF3	0	1.61334	0.882	0.217	0	Epithelial cells
SOX4	0	1.59803	0.917	0.499	0	Epithelial cells
KLK2	0	1.59233	0.529	0.158	0	Epithelial cells
CLDN3	0	1.51544	0.825	0.183	0	Epithelial cells
CD24	0	1.50812	0.794	0.224	0	Epithelial cells
FXYD3	0	1.49894	0.723	0.179	0	Epithelial cells
PCSK1N	0	1.49758	0.783	0.224	0	Epithelial cells
EPCAM	0	1.46028	0.861	0.182	0	Epithelial cells
PRAC1	0	1.41223	0.695	0.169	0	Epithelial cells
STMN1	0	1.41165	0.811	0.363	0	Epithelial cells
RORB	0	1.39288	0.361	0.108	0	Epithelial cells
TACSTD2	0	1.35785	0.446	0.161	0	Epithelial cells
WFDC2	0	1.35226	0.328	0.091	0	Epithelial cells
MDK	0	1.34115	0.926	0.477	0	Epithelial cells
GDF15	0	1.32023	0.544	0.139	0	Epithelial cells
CLDN7	0	1.28686	0.842	0.179	0	Epithelial cells
MARCKSL1	0	1.26693	0.962	0.497	0	Epithelial cells
PERP	0	1.25842	0.756	0.276	0	Epithelial cells
NGFRAP1	0	1.23942	0.446	0.171	0	Epithelial cells
SPINT2	0	1.21216	0.806	0.339	0	Epithelial cells
PDLIM5	0	1.20638	0.717	0.378	0	Epithelial cells
C19orf48	0	1.19938	0.801	0.277	0	Epithelial cells
UBE2S	0	1.18992	0.85	0.471	0	Epithelial cells
TMEM238	0	1.12732	0.449	0.106	0	Epithelial cells
PRDX2	0	1.12687	0.926	0.544	0	Epithelial cells
GNB2L1	0	1.1218	0.47	0.198	0	Epithelial cells
ATP5I	0	1.12075	0.466	0.193	0	Epithelial cells
TSPAN8	0	1.11728	0.495	0.113	0	Epithelial cells
FAM110B	0	1.11202	0.536	0.157	0	Epithelial cells
TSTD1	0	1.10473	0.952	0.414	0	Epithelial cells
ODC1	0	1.09721	0.827	0.446	0	Epithelial cells
TIMM13	0	1.08904	0.931	0.535	0	Epithelial cells
ATP5E	0	1.08001	0.469	0.198	0	Epithelial cells
PPDPF	0	1.06432	0.988	0.802	0	Epithelial cells
CAMK2N1	0	1.05633	0.646	0.251	0	Epithelial cells
SNHG19	0	1.05493	0.808	0.301	0	Epithelial cells
TMEFF2	0	1.04934	0.391	0.077	0	Epithelial cells
ACPP	0	1.03025	0.314	0.057	0	Epithelial cells
SHFM1	0	1.02786	0.457	0.183	0	Epithelial cells
MMP7	1.24566e-247	1.51918	0.277	0.106	3.74619e-243	Epithelial cells
SLPI	7.29873e-229	1.23326	0.262	0.1	2.19502e-224	Epithelial cells
SPON2	2.45296e-212	1.38371	0.477	0.321	7.37704e-208	Epithelial cells
C6orf15	5.28531e-181	2.61967	0.16	0.377	1.5895e-176	Epithelial cells
RBP1	4.13461e-38	1.57376	0.382	0.346	1.24344e-33	Epithelial cells
TAGLN	0	4.90612	0.949	0.231	0	Myofibroblasts
ACTA2	0	4.73023	0.889	0.142	0	Myofibroblasts
MYL9	0	4.03765	0.963	0.245	0	Myofibroblasts
C11orf96	0	4.01573	0.959	0.265	0	Myofibroblasts
TPM2	0	3.96756	0.964	0.206	0	Myofibroblasts
ADIRF	0	3.87969	0.965	0.331	0	Myofibroblasts
NDUFA4L2	0	3.40614	0.706	0.082	0	Myofibroblasts
RGS5	0	3.2773	0.798	0.114	0	Myofibroblasts
CALD1	0	3.14869	0.985	0.495	0	Myofibroblasts
MYH11	0	3.11417	0.741	0.037	0	Myofibroblasts
SPARCL1	0	3.07868	0.905	0.171	0	Myofibroblasts
PPP1R14A	0	3.01221	0.792	0.065	0	Myofibroblasts
CRYAB	0	2.62662	0.729	0.182	0	Myofibroblasts
SOD3	0	2.60049	0.87	0.128	0	Myofibroblasts
IGFBP7	0	2.57836	1	0.443	0	Myofibroblasts
HIGD1B	0	2.5695	0.437	0.022	0	Myofibroblasts
COL18A1	0	2.50701	0.787	0.241	0	Myofibroblasts
TPM1	0	2.43872	0.9	0.63	0	Myofibroblasts
NOTCH3	0	2.38545	0.802	0.117	0	Myofibroblasts
BGN	0	2.37796	0.92	0.182	0	Myofibroblasts
ACTG2	0	2.34679	0.439	0.021	0	Myofibroblasts
CAV1	0	2.27804	0.822	0.135	0	Myofibroblasts
PLAC9	0	2.26513	0.837	0.13	0	Myofibroblasts
MFGE8	0	2.26108	0.822	0.207	0	Myofibroblasts
SELENOM	0	2.21419	0.837	0.303	0	Myofibroblasts
FLNA	0	2.1805	0.81	0.379	0	Myofibroblasts
CAVIN3	0	2.15791	0.741	0.103	0	Myofibroblasts
MYLK	0	2.13306	0.674	0.084	0	Myofibroblasts
CSRP2	0	2.13301	0.736	0.22	0	Myofibroblasts
COL6A2	0	2.13265	0.839	0.19	0	Myofibroblasts
DSTN	0	2.11406	0.974	0.843	0	Myofibroblasts
VIM	0	2.10377	0.994	0.579	0	Myofibroblasts
MCAM	0	2.07352	0.652	0.072	0	Myofibroblasts
CNN1	0	2.02846	0.513	0.031	0	Myofibroblasts
COL4A2	0	2.02811	0.669	0.147	0	Myofibroblasts
GJA4	0	2.0201	0.575	0.022	0	Myofibroblasts
FILIP1L	0	2.00971	0.691	0.113	0	Myofibroblasts
IFITM3	0	1.96875	0.988	0.567	0	Myofibroblasts
CSRP1	0	1.95589	0.685	0.325	0	Myofibroblasts
LGALS1	0	1.91546	0.996	0.614	0	Myofibroblasts
CYTOR	0	1.85793	0.609	0.208	0	Myofibroblasts
IGFBP5	0	1.83671	0.633	0.176	0	Myofibroblasts
PDGFRB	0	1.82876	0.641	0.072	0	Myofibroblasts
TGFB1I1	0	1.82757	0.65	0.091	0	Myofibroblasts
LHFPL6	0	1.81763	0.632	0.092	0	Myofibroblasts
MT1M	0	1.79791	0.406	0.08	0	Myofibroblasts
RERGL	0	1.79131	0.288	0.011	0	Myofibroblasts
COX4I2	0	1.75735	0.444	0.011	0	Myofibroblasts
A2M	0	1.72804	0.864	0.205	0	Myofibroblasts
COL4A1	0	1.71345	0.579	0.129	0	Myofibroblasts
FXYD1	0	1.66945	0.629	0.105	0	Myofibroblasts
COL6A1	0	1.667	0.687	0.166	0	Myofibroblasts
NNMT	0	1.64329	0.594	0.187	0	Myofibroblasts
COX7A1	0	1.63982	0.725	0.142	0	Myofibroblasts
SERPING1	0	1.63203	0.741	0.234	0	Myofibroblasts
SPARC	0	1.61664	0.725	0.233	0	Myofibroblasts
RRAS	0	1.60401	0.611	0.173	0	Myofibroblasts
MEF2C	0	1.60152	0.614	0.119	0	Myofibroblasts
TPM4	0	1.59369	0.84	0.478	0	Myofibroblasts
CAVIN1	0	1.5895	0.663	0.167	0	Myofibroblasts
FRZB	0	1.57794	0.518	0.056	0	Myofibroblasts
PLN	0	1.56438	0.418	0.013	0	Myofibroblasts
RRAD	0	1.5628	0.392	0.081	0	Myofibroblasts
TINAGL1	0	1.56046	0.613	0.135	0	Myofibroblasts
MYL6	0	1.54773	0.999	0.979	0	Myofibroblasts
CRIP2	0	1.50768	0.783	0.414	0	Myofibroblasts
IFITM2	0	1.49862	0.928	0.501	0	Myofibroblasts
ID4	0	1.48855	0.527	0.149	0	Myofibroblasts
MGP	0	1.43463	0.981	0.571	0	Myofibroblasts
LMOD1	0	1.42212	0.457	0.019	0	Myofibroblasts
AEBP1	0	1.41162	0.612	0.121	0	Myofibroblasts
PGF	0	1.40716	0.558	0.135	0	Myofibroblasts
LMNA	0	1.40036	0.926	0.661	0	Myofibroblasts
TIMP1	0	1.39589	0.955	0.565	0	Myofibroblasts
SYNPO2	0	1.38516	0.476	0.054	0	Myofibroblasts
MAP3K20	0	1.37829	0.498	0.067	0	Myofibroblasts
PDLIM7	0	1.34743	0.588	0.209	0	Myofibroblasts
WFDC1	0	1.32495	0.371	0.019	0	Myofibroblasts
SH3BGRL	0	1.26742	0.761	0.325	0	Myofibroblasts
PLXDC1	0	1.26233	0.361	0.051	0	Myofibroblasts
EHD2	0	1.26084	0.522	0.077	0	Myofibroblasts
EPS8	0	1.23746	0.538	0.171	0	Myofibroblasts
ADAMTS4	0	1.21868	0.354	0.049	0	Myofibroblasts
RCAN2	0	1.21185	0.456	0.083	0	Myofibroblasts
TIMP3	0	1.1973	0.6	0.198	0	Myofibroblasts
KANK2	0	1.19369	0.489	0.131	0	Myofibroblasts
EPAS1	0	1.18806	0.605	0.191	0	Myofibroblasts
C2orf40	0	1.1868	0.362	0.045	0	Myofibroblasts
PDLIM3	0	1.18261	0.473	0.084	0	Myofibroblasts
PRRX1	0	1.17343	0.493	0.075	0	Myofibroblasts
PLS3	0	1.16427	0.472	0.104	0	Myofibroblasts
COL3A1	0	1.15831	0.578	0.147	0	Myofibroblasts
RBPMS	0	1.14719	0.534	0.164	0	Myofibroblasts
COL14A1	0	1.14409	0.444	0.045	0	Myofibroblasts
C1QTNF1	0	1.13088	0.404	0.033	0	Myofibroblasts
MAP3K7CL	0	1.09544	0.327	0.024	0	Myofibroblasts
IGFBP4	0	1.08602	0.726	0.243	0	Myofibroblasts
KCNE4	0	1.07319	0.329	0.02	0	Myofibroblasts
EFHD1	0	1.07301	0.43	0.037	0	Myofibroblasts
TNS1	0	1.0591	0.475	0.107	0	Myofibroblasts
COL1A2	0	1.04429	0.657	0.171	0	Myofibroblasts
CCDC3	0	1.02298	0.378	0.058	0	Myofibroblasts
CAV2	0	1.02296	0.475	0.101	0	Myofibroblasts
GGT5	0	1.01927	0.407	0.077	0	Myofibroblasts
CRISPLD2	0	1.01419	0.411	0.09	0	Myofibroblasts
NTRK2	0	1.01115	0.361	0.036	0	Myofibroblasts
DKK3	0	1.00993	0.471	0.093	0	Myofibroblasts
ADAMTS1	2.07112e-300	1.35498	0.487	0.139	6.22867e-296	Myofibroblasts
TBX2	4.2933e-292	1.01378	0.405	0.096	1.29117e-287	Myofibroblasts
PALLD	6.96492e-282	1.15928	0.525	0.172	2.09463e-277	Myofibroblasts
CPE	4.82754e-281	1.09231	0.697	0.332	1.45183e-276	Myofibroblasts
THY1	3.05978e-279	2.04135	0.412	0.103	9.20198e-275	Myofibroblasts
PDLIM1	5.30394e-276	1.31455	0.701	0.335	1.59511e-271	Myofibroblasts
CD63	1.4173e-275	1.03597	0.991	0.895	4.26238e-271	Myofibroblasts
NR2F2	1.65534e-273	1.54207	0.686	0.336	4.97827e-269	Myofibroblasts
LPP	2.23956e-271	1.55558	0.692	0.381	6.73524e-267	Myofibroblasts
IER3	2.20092e-269	2.76173	0.778	0.45	6.61905e-265	Myofibroblasts
ITGB1	1.4113e-259	1.29307	0.806	0.58	4.24434e-255	Myofibroblasts
MGST3	1.70203e-258	1.30768	0.841	0.665	5.11869e-254	Myofibroblasts
FN1	1.28507e-257	1.38828	0.625	0.257	3.86473e-253	Myofibroblasts
MT2A	2.23398e-252	1.51645	0.95	0.777	6.71846e-248	Myofibroblasts
ACTN1	1.41826e-251	1.31584	0.61	0.285	4.26527e-247	Myofibroblasts
HES4	4.63301e-250	1.39616	0.742	0.441	1.39333e-245	Myofibroblasts
TBX2-AS1	1.87648e-246	1.03775	0.393	0.11	5.64332e-242	Myofibroblasts
C1R	8.17988e-244	1.09927	0.511	0.166	2.46002e-239	Myofibroblasts
PCOLCE	2.73391e-236	1.0073	0.483	0.156	8.22195e-232	Myofibroblasts
LTBP1	2.17291e-229	1.04875	0.434	0.139	6.5348e-225	Myofibroblasts
PDGFA	7.90068e-227	1.21222	0.47	0.171	2.37605e-222	Myofibroblasts
INAFM1	2.48785e-225	1.11648	0.531	0.216	7.48195e-221	Myofibroblasts
TLN1	8.36701e-223	1.37196	0.645	0.361	2.5163e-218	Myofibroblasts
GEM	3.31658e-217	1.53305	0.492	0.173	9.97429e-213	Myofibroblasts
TPPP3	1.05104e-212	1.33694	0.523	0.208	3.1609e-208	Myofibroblasts
MAP1B	1.02261e-211	1.0899	0.663	0.327	3.07538e-207	Myofibroblasts
SEPT7	2.65706e-211	1.36264	0.788	0.612	7.99084e-207	Myofibroblasts
SELENOW	7.01096e-207	1.10418	0.822	0.52	2.10848e-202	Myofibroblasts
TSC22D1	2.80659e-206	1.36148	0.8	0.576	8.44054e-202	Myofibroblasts
CD151	1.21115e-198	1.34456	0.767	0.573	3.64241e-194	Myofibroblasts
DEPP1	1.1146e-195	1.17486	0.252	0.052	3.35206e-191	Myofibroblasts
HSPB1	1.96502e-186	1.24808	0.989	0.947	5.90961e-182	Myofibroblasts
CYB5R3	1.74678e-185	1.06754	0.705	0.483	5.25325e-181	Myofibroblasts
MIR4435-2HG	9.596e-182	1.37027	0.513	0.226	2.8859e-177	Myofibroblasts
MT1E	1.94221e-174	1.29638	0.646	0.317	5.84099e-170	Myofibroblasts
ACTN4	5.04497e-173	1.44745	0.667	0.455	1.51722e-168	Myofibroblasts
MT-ATP6	1.54204e-169	1.00903	1	0.997	4.63753e-165	Myofibroblasts
MYH9	5.89288e-169	1.06274	0.646	0.391	1.77222e-164	Myofibroblasts
MFAP4	8.18678e-168	1.26487	0.324	0.093	2.46209e-163	Myofibroblasts
PTP4A3	4.17222e-167	1.33793	0.525	0.273	1.25475e-162	Myofibroblasts
YBX3	2.79047e-163	1.08824	0.679	0.428	8.39205e-159	Myofibroblasts
LBH	5.06311e-160	1.14766	0.528	0.257	1.52268e-155	Myofibroblasts
GADD45B	1.30634e-158	1.79032	0.818	0.66	3.9287e-154	Myofibroblasts
HSPA1A	1.72702e-156	1.18814	0.936	0.776	5.19384e-152	Myofibroblasts
ILK	5.67189e-156	1.0191	0.53	0.279	1.70576e-151	Myofibroblasts
SORBS2	9.53659e-155	1.16613	0.374	0.14	2.86803e-150	Myofibroblasts
FOSB	6.24703e-149	1.23694	0.886	0.81	1.87873e-144	Myofibroblasts
CEBPD	6.40275e-146	1.49809	0.714	0.515	1.92556e-141	Myofibroblasts
CRIP1	4.31666e-141	1.09508	0.623	0.343	1.29819e-136	Myofibroblasts
VCL	3.86839e-137	1.03059	0.454	0.225	1.16338e-132	Myofibroblasts
RGS16	9.32008e-130	1.23269	0.46	0.213	2.80292e-125	Myofibroblasts
SNCG	1.47618e-129	1.41196	0.375	0.149	4.43946e-125	Myofibroblasts
SERTAD1	3.48607e-127	1.22172	0.767	0.632	1.0484e-122	Myofibroblasts
HCFC1R1	1.03265e-125	1.07666	0.624	0.456	3.10558e-121	Myofibroblasts
CD81	5.54487e-121	1.07984	0.788	0.631	1.66756e-116	Myofibroblasts
JUNB	1.01355e-115	1.07919	0.906	0.879	3.04814e-111	Myofibroblasts
S100A4	5.0396e-109	1.16723	0.702	0.464	1.51561e-104	Myofibroblasts
CDKN1A	4.49293e-90	1.16696	0.748	0.628	1.3512e-85	Myofibroblasts
CCL2	1.0656e-82	1.72348	0.509	0.311	3.2047e-78	Myofibroblasts
ATF3	4.05164e-76	1.11535	0.776	0.675	1.21849e-71	Myofibroblasts
JUN	2.20248e-60	1.08224	0.871	0.828	6.62373e-56	Myofibroblasts
FOS	4.35418e-47	1.02234	0.796	0.772	1.30948e-42	Myofibroblasts
C12orf75	3.4896e-30	1.04837	0.393	0.315	1.04946e-25	Myofibroblasts
HSPA6	9.75302e-15	1.06957	0.39	0.336	2.93312e-10	Myofibroblasts
CLU	4.09117e-09	1.2739	0.433	0.434	0.000123038	Myofibroblasts
VWF	0	3.5721	0.901	0.05	0	Endothelial cells
HSPG2	0	3.35267	0.89	0.128	0	Endothelial cells
STC1	0	3.35235	0.514	0.032	0	Endothelial cells
SELE	0	3.12974	0.569	0.035	0	Endothelial cells
CLDN5	0	3.10075	0.761	0.016	0	Endothelial cells
PLVAP	0	3.0628	0.83	0.024	0	Endothelial cells
RAMP2	0	2.99903	0.949	0.18	0	Endothelial cells
A2M	0	2.93143	0.923	0.201	0	Endothelial cells
AQP1	0	2.87189	0.814	0.041	0	Endothelial cells
GNG11	0	2.84092	0.956	0.135	0	Endothelial cells
ACKR1	0	2.83225	0.53	0.025	0	Endothelial cells
PECAM1	0	2.69144	0.896	0.048	0	Endothelial cells
IFI27	0	2.65445	0.992	0.329	0	Endothelial cells
PCAT19	0	2.58514	0.859	0.036	0	Endothelial cells
FLT1	0	2.47262	0.741	0.016	0	Endothelial cells
SPARCL1	0	2.47199	0.944	0.169	0	Endothelial cells
SPARC	0	2.43884	0.902	0.223	0	Endothelial cells
ENG	0	2.42713	0.85	0.107	0	Endothelial cells
RNASE1	0	2.4155	0.925	0.074	0	Endothelial cells
SLC9A3R2	0	2.41487	0.808	0.311	0	Endothelial cells
TM4SF1	0	2.32722	0.958	0.344	0	Endothelial cells
RAMP3	0	2.25478	0.745	0.019	0	Endothelial cells
EMP1	0	2.24297	0.852	0.167	0	Endothelial cells
COL4A1	0	2.22484	0.627	0.127	0	Endothelial cells
IGFBP4	0	2.18769	0.93	0.231	0	Endothelial cells
CD93	0	2.18768	0.791	0.038	0	Endothelial cells
INSR	0	2.16931	0.66	0.221	0	Endothelial cells
CRIP2	0	2.15698	0.946	0.405	0	Endothelial cells
ECSCR	0	2.14234	0.871	0.012	0	Endothelial cells
ESM1	0	2.13348	0.287	0.026	0	Endothelial cells
SOCS3	0	2.07932	0.801	0.334	0	Endothelial cells
COL4A2	0	2.03684	0.647	0.149	0	Endothelial cells
HLA-E	0	2.0263	0.988	0.592	0	Endothelial cells
C2CD4B	0	1.99325	0.62	0.019	0	Endothelial cells
ANGPT2	0	1.99083	0.442	0.084	0	Endothelial cells
ICAM1	0	1.95335	0.794	0.175	0	Endothelial cells
CAV1	0	1.94369	0.82	0.136	0	Endothelial cells
ESAM	0	1.9334	0.761	0.043	0	Endothelial cells
ADGRL4	0	1.92652	0.784	0.008	0	Endothelial cells
VWA1	0	1.89585	0.631	0.214	0	Endothelial cells
FKBP1A	0	1.8927	0.973	0.754	0	Endothelial cells
EPAS1	0	1.89149	0.842	0.177	0	Endothelial cells
TGFBR2	0	1.85504	0.827	0.117	0	Endothelial cells
EMCN	0	1.85217	0.769	0.01	0	Endothelial cells
PODXL	0	1.8404	0.642	0.091	0	Endothelial cells
ENPP2	0	1.82001	0.343	0.026	0	Endothelial cells
VAMP5	0	1.81909	0.892	0.266	0	Endothelial cells
CD34	0	1.81176	0.711	0.02	0	Endothelial cells
SPRY1	0	1.80666	0.736	0.165	0	Endothelial cells
TCF4	0	1.80408	0.873	0.248	0	Endothelial cells
HTRA1	0	1.79454	0.691	0.112	0	Endothelial cells
CALCRL	0	1.77951	0.738	0.019	0	Endothelial cells
VIM	0	1.76769	0.995	0.579	0	Endothelial cells
GJA1	0	1.71816	0.715	0.137	0	Endothelial cells
SPTBN1	0	1.70155	0.847	0.346	0	Endothelial cells
COL15A1	0	1.67553	0.566	0.048	0	Endothelial cells
FAM167B	0	1.67339	0.605	0.017	0	Endothelial cells
IFITM3	0	1.66369	0.996	0.567	0	Endothelial cells
THBD	0	1.65959	0.672	0.059	0	Endothelial cells
BCAM	0	1.65603	0.848	0.406	0	Endothelial cells
TSC22D1	0	1.64461	0.9	0.57	0	Endothelial cells
STOM	0	1.62834	0.812	0.198	0	Endothelial cells
EGFL7	0	1.62637	0.79	0.245	0	Endothelial cells
SERPINE1	0	1.62387	0.465	0.082	0	Endothelial cells
CLEC14A	0	1.60157	0.646	0.005	0	Endothelial cells
RBP7	0	1.56584	0.495	0.035	0	Endothelial cells
PCDH17	0	1.5637	0.623	0.011	0	Endothelial cells
GNAI2	0	1.56363	0.871	0.395	0	Endothelial cells
RCAN1	0	1.55701	0.542	0.127	0	Endothelial cells
NPDC1	0	1.5447	0.935	0.577	0	Endothelial cells
IFITM2	0	1.51742	0.981	0.498	0	Endothelial cells
APP	0	1.51014	0.9	0.498	0	Endothelial cells
EFNB2	0	1.49688	0.633	0.207	0	Endothelial cells
CYYR1	0	1.47112	0.679	0.008	0	Endothelial cells
PTPRB	0	1.46332	0.644	0.018	0	Endothelial cells
ITGA6	0	1.45804	0.673	0.092	0	Endothelial cells
LDB2	0	1.44805	0.679	0.031	0	Endothelial cells
TIMP3	0	1.43429	0.734	0.19	0	Endothelial cells
ADAM15	0	1.43144	0.71	0.282	0	Endothelial cells
CD59	0	1.42638	0.894	0.475	0	Endothelial cells
KCTD12	0	1.4172	0.604	0.102	0	Endothelial cells
PDLIM1	0	1.41241	0.857	0.326	0	Endothelial cells
PRCP	0	1.40981	0.619	0.214	0	Endothelial cells
HEG1	0	1.36876	0.635	0.057	0	Endothelial cells
CXorf36	0	1.36126	0.65	0.007	0	Endothelial cells
MMRN2	0	1.35097	0.597	0.007	0	Endothelial cells
ELK3	0	1.3349	0.676	0.076	0	Endothelial cells
RND1	0	1.33436	0.538	0.048	0	Endothelial cells
YBX3	0	1.33288	0.866	0.417	0	Endothelial cells
SLC2A3	0	1.33238	0.712	0.186	0	Endothelial cells
LIFR	0	1.33062	0.486	0.079	0	Endothelial cells
LAMA4	0	1.32884	0.483	0.091	0	Endothelial cells
PLPP3	0	1.32584	0.578	0.107	0	Endothelial cells
BST2	0	1.3218	0.831	0.334	0	Endothelial cells
ACVRL1	0	1.3199	0.6	0.029	0	Endothelial cells
LMCD1	0	1.31446	0.648	0.106	0	Endothelial cells
CDH5	0	1.30564	0.571	0.004	0	Endothelial cells
ITGA5	0	1.30246	0.54	0.061	0	Endothelial cells
HLA-B	0	1.28843	0.998	0.725	0	Endothelial cells
WWTR1	0	1.28614	0.717	0.164	0	Endothelial cells
ICAM2	0	1.28572	0.535	0.045	0	Endothelial cells
APOLD1	0	1.28339	0.551	0.129	0	Endothelial cells
JAM2	0	1.28071	0.606	0.023	0	Endothelial cells
MSN	0	1.27909	0.753	0.275	0	Endothelial cells
IGFBP7	0	1.27305	0.982	0.444	0	Endothelial cells
SYNPO	0	1.26994	0.563	0.062	0	Endothelial cells
NOTCH4	0	1.26949	0.458	0.042	0	Endothelial cells
HYAL2	0	1.26772	0.6	0.157	0	Endothelial cells
IL6ST	0	1.26606	0.769	0.261	0	Endothelial cells
SLCO2A1	0	1.26001	0.429	0.035	0	Endothelial cells
TMEM88	0	1.25396	0.542	0.061	0	Endothelial cells
SNCG	0	1.23959	0.679	0.131	0	Endothelial cells
MEF2C	0	1.2357	0.719	0.113	0	Endothelial cells
KLF2	0	1.23436	0.715	0.282	0	Endothelial cells
GSN	0	1.22929	0.916	0.384	0	Endothelial cells
PLXND1	0	1.22456	0.617	0.081	0	Endothelial cells
TGM2	0	1.2176	0.664	0.139	0	Endothelial cells
ADAMTS1	0	1.21457	0.567	0.134	0	Endothelial cells
TMSB10	0	1.21436	1	0.997	0	Endothelial cells
ADGRF5	0	1.20771	0.502	0.051	0	Endothelial cells
MCAM	0	1.19999	0.517	0.081	0	Endothelial cells
ADAMTS9	0	1.19754	0.501	0.026	0	Endothelial cells
BMPR2	0	1.19683	0.665	0.172	0	Endothelial cells
MYH9	0	1.19634	0.817	0.381	0	Endothelial cells
LMO2	0	1.1924	0.62	0.033	0	Endothelial cells
VCAM1	0	1.19207	0.363	0.043	0	Endothelial cells
SOX7	0	1.19018	0.515	0.037	0	Endothelial cells
ETS2	0	1.18089	0.738	0.3	0	Endothelial cells
THSD7A	0	1.18051	0.528	0.09	0	Endothelial cells
IL3RA	0	1.18	0.51	0.016	0	Endothelial cells
S100A16	0	1.16035	0.797	0.32	0	Endothelial cells
PALMD	0	1.16024	0.558	0.027	0	Endothelial cells
TIE1	0	1.15237	0.533	0.01	0	Endothelial cells
PTRF	0	1.13942	0.384	0.056	0	Endothelial cells
MMP2	0	1.13514	0.427	0.089	0	Endothelial cells
SWAP70	0	1.12799	0.609	0.112	0	Endothelial cells
LIMS2	0	1.12556	0.562	0.036	0	Endothelial cells
ANXA2	0	1.12394	0.947	0.492	0	Endothelial cells
KDR	0	1.12184	0.47	0.005	0	Endothelial cells
SH3BP5	0	1.10683	0.622	0.129	0	Endothelial cells
ARHGAP29	0	1.08991	0.684	0.227	0	Endothelial cells
TSPAN7	0	1.08242	0.521	0.022	0	Endothelial cells
CCL14	0	1.07766	0.372	0.003	0	Endothelial cells
ICAM4	0	1.07567	0.492	0.032	0	Endothelial cells
NRP1	0	1.06552	0.561	0.109	0	Endothelial cells
NUAK1	0	1.05857	0.548	0.123	0	Endothelial cells
NFIB	0	1.04892	0.786	0.357	0	Endothelial cells
DPYSL2	0	1.03445	0.673	0.203	0	Endothelial cells
TM4SF18	0	1.02638	0.437	0.01	0	Endothelial cells
ECE1	0	1.02547	0.637	0.232	0	Endothelial cells
MTUS1	0	1.02085	0.55	0.106	0	Endothelial cells
ITM2A	0	1.01986	0.618	0.102	0	Endothelial cells
TMEM255B	0	1.016	0.557	0.066	0	Endothelial cells
IL33	0	1.00619	0.451	0.02	0	Endothelial cells
DLC1	0	1.006	0.532	0.066	0	Endothelial cells
CCDC85B	1.58173e-301	1.22715	0.954	0.73	4.75688e-297	Endothelial cells
HLA-C	9.22901e-301	1.0677	0.996	0.742	2.77553e-296	Endothelial cells
SEC14L1	8.33055e-289	1.15821	0.637	0.264	2.50533e-284	Endothelial cells
MGST2	1.50983e-277	1.01236	0.731	0.372	4.54067e-273	Endothelial cells
RGS3	4.947e-275	1.22717	0.395	0.096	1.48776e-270	Endothelial cells
ABL2	1.26927e-266	1.16776	0.623	0.253	3.81719e-262	Endothelial cells
CDKN1A	4.32468e-264	1.39498	0.885	0.619	1.3006e-259	Endothelial cells
PRSS23	6.90555e-258	1.05244	0.653	0.264	2.07678e-253	Endothelial cells
RHOC	1.34015e-248	1.07015	0.872	0.551	4.03036e-244	Endothelial cells
ADIRF	8.31959e-246	1.26453	0.72	0.346	2.50203e-241	Endothelial cells
CAVIN1	3.4004e-241	1.31765	0.507	0.176	1.02264e-236	Endothelial cells
ITGB1	2.58168e-240	1.24855	0.852	0.578	7.76415e-236	Endothelial cells
FOSB	5.95545e-238	1.15431	0.942	0.807	1.79104e-233	Endothelial cells
NCOA7	3.42133e-237	1.0243	0.679	0.319	1.02893e-232	Endothelial cells
ZFP36L1	1.26082e-236	1.08421	0.877	0.552	3.79179e-232	Endothelial cells
IRF1	3.33643e-227	1.29045	0.766	0.446	1.0034e-222	Endothelial cells
LMNA	5.13036e-227	1.03198	0.924	0.661	1.54291e-222	Endothelial cells
COL18A1	1.45189e-226	1.07083	0.623	0.252	4.36643e-222	Endothelial cells
IGFBP3	2.30808e-222	2.67922	0.442	0.145	6.94131e-218	Endothelial cells
MIDN	7.9594e-219	1.10233	0.804	0.547	2.39371e-214	Endothelial cells
ID1	7.62877e-205	1.25093	0.762	0.422	2.29427e-200	Endothelial cells
DUSP23	1.579e-182	1.1372	0.689	0.424	4.74868e-178	Endothelial cells
KLF4	1.89322e-165	1.21033	0.654	0.391	5.69367e-161	Endothelial cells
TXNIP	6.34729e-152	1.11111	0.673	0.41	1.90888e-147	Endothelial cells
HEY1	3.71103e-150	1.13105	0.306	0.095	1.11605e-145	Endothelial cells
CLU	3.41722e-111	1.41696	0.637	0.422	1.0277e-106	Endothelial cells
EFNA1	1.13034e-109	1.25122	0.549	0.33	3.3994e-105	Endothelial cells
MIR4435-2HG	2.60995e-107	1.10434	0.455	0.23	7.84918e-103	Endothelial cells
CYTOR	2.10169e-91	1.14269	0.435	0.219	6.32064e-87	Endothelial cells
CCL3	0	5.25582	0.869	0.155	0	Macrophages
APOE	0	5.05249	0.842	0.227	0	Macrophages
APOC1	0	4.93505	0.859	0.201	0	Macrophages
C1QB	0	4.91071	0.914	0.08	0	Macrophages
C1QA	0	4.86099	0.927	0.083	0	Macrophages
C1QC	0	4.24473	0.899	0.05	0	Macrophages
LYZ	0	4.23974	0.95	0.104	0	Macrophages
HLA-DRA	0	4.15715	0.998	0.367	0	Macrophages
CCL3L1	0	4.14289	0.53	0.027	0	Macrophages
CCL4L2	0	3.94494	0.698	0.112	0	Macrophages
CCL4	0	3.91111	0.838	0.211	0	Macrophages
TYROBP	0	3.86677	1	0.182	0	Macrophages
CD74	0	3.84388	1	0.544	0	Macrophages
HLA-DPA1	0	3.82373	0.99	0.266	0	Macrophages
HLA-DRB1	0	3.78245	0.979	0.263	0	Macrophages
IL1B	0	3.75213	0.746	0.071	0	Macrophages
HLA-DPB1	0	3.65168	0.992	0.322	0	Macrophages
AIF1	0	3.48103	0.983	0.085	0	Macrophages
FTL	0	3.45134	1	0.997	0	Macrophages
HLA-DQA1	0	3.29045	0.933	0.114	0	Macrophages
CTSB	0	3.25399	0.984	0.403	0	Macrophages
CTSD	0	3.18742	0.956	0.562	0	Macrophages
PSAP	0	3.06949	0.998	0.733	0	Macrophages
HLA-DQB1	0	3.03015	0.939	0.153	0	Macrophages
FCER1G	0	3.01554	0.984	0.137	0	Macrophages
CXCL8	0	2.96657	0.903	0.346	0	Macrophages
CD68	0	2.92094	0.951	0.111	0	Macrophages
HLA-DRB5	0	2.91929	0.943	0.181	0	Macrophages
MS4A6A	0	2.91078	0.925	0.042	0	Macrophages
MS4A7	0	2.79656	0.892	0.047	0	Macrophages
CXCL3	0	2.7467	0.754	0.208	0	Macrophages
CD14	0	2.62868	0.795	0.034	0	Macrophages
FCGR2A	0	2.61613	0.892	0.054	0	Macrophages
FCGR3A	0	2.60808	0.827	0.028	0	Macrophages
PLAUR	0	2.57748	0.875	0.207	0	Macrophages
CTSZ	0	2.54352	0.947	0.419	0	Macrophages
HLA-DMA	0	2.54187	0.939	0.19	0	Macrophages
CTSS	0	2.52571	0.937	0.149	0	Macrophages
RNASE1	0	2.50398	0.52	0.107	0	Macrophages
BCL2A1	0	2.47827	0.783	0.106	0	Macrophages
LST1	0	2.4721	0.932	0.076	0	Macrophages
GPR183	0	2.39987	0.81	0.11	0	Macrophages
GRN	0	2.38469	0.952	0.485	0	Macrophages
LAPTM5	0	2.37244	0.979	0.244	0	Macrophages
CXCL2	0	2.33061	0.833	0.315	0	Macrophages
HLA-DMB	0	2.31827	0.853	0.067	0	Macrophages
C15orf48	0	2.30733	0.735	0.083	0	Macrophages
SOD2	0	2.29532	0.943	0.48	0	Macrophages
NPC2	0	2.26892	0.995	0.67	0	Macrophages
HMOX1	0	2.2558	0.74	0.097	0	Macrophages
CST3	0	2.2515	0.998	0.822	0	Macrophages
CYBA	0	2.2451	0.983	0.449	0	Macrophages
CTSL	0	2.22545	0.853	0.29	0	Macrophages
IER3	0	2.20259	0.957	0.449	0	Macrophages
PLEK	0	2.19822	0.805	0.037	0	Macrophages
LGMN	0	2.17053	0.723	0.193	0	Macrophages
TMEM176B	0	2.16636	0.855	0.196	0	Macrophages
GPNMB	0	2.16535	0.627	0.082	0	Macrophages
C5AR1	0	2.15184	0.796	0.039	0	Macrophages
CCL20	0	2.12275	0.385	0.055	0	Macrophages
CD83	0	2.05924	0.89	0.244	0	Macrophages
S100A9	0	2.05314	0.513	0.068	0	Macrophages
TYMP	0	2.03343	0.924	0.354	0	Macrophages
CTSC	0	2.00477	0.834	0.182	0	Macrophages
FCGRT	0	1.98676	0.949	0.56	0	Macrophages
CAPG	0	1.96941	0.813	0.184	0	Macrophages
ITGB2	0	1.95618	0.874	0.099	0	Macrophages
SAT1	0	1.9165	0.998	0.889	0	Macrophages
LITAF	0	1.87537	0.937	0.514	0	Macrophages
NAMPT	0	1.82864	0.896	0.416	0	Macrophages
SRGN	0	1.7966	0.993	0.403	0	Macrophages
FOLR2	0	1.76991	0.497	0.014	0	Macrophages
SPI1	0	1.75542	0.795	0.055	0	Macrophages
SDS	0	1.74083	0.488	0.016	0	Macrophages
MSR1	0	1.73593	0.686	0.012	0	Macrophages
CSF1R	0	1.73391	0.742	0.022	0	Macrophages
MS4A4A	0	1.73192	0.721	0.015	0	Macrophages
EREG	0	1.72987	0.304	0.025	0	Macrophages
SERPINA1	0	1.72968	0.716	0.045	0	Macrophages
FGL2	0	1.68865	0.745	0.055	0	Macrophages
HLA-DQA2	0	1.68539	0.641	0.056	0	Macrophages
MMP9	0	1.67424	0.527	0.069	0	Macrophages
NINJ1	0	1.65098	0.874	0.453	0	Macrophages
CD163	0	1.6481	0.623	0.014	0	Macrophages
F13A1	0	1.63984	0.447	0.023	0	Macrophages
RNASE6	0	1.6183	0.729	0.029	0	Macrophages
RNASET2	0	1.61384	0.895	0.488	0	Macrophages
FTH1	0	1.61355	1	0.999	0	Macrophages
PLTP	0	1.61209	0.606	0.129	0	Macrophages
CYBB	0	1.60682	0.72	0.02	0	Macrophages
CFLAR	0	1.57488	0.833	0.345	0	Macrophages
LIPA	0	1.57211	0.655	0.124	0	Macrophages
TNFSF13B	0	1.57185	0.737	0.064	0	Macrophages
SLCO2B1	0	1.56831	0.645	0.019	0	Macrophages
TMSB4X	0	1.56237	0.999	0.957	0	Macrophages
VAMP8	0	1.53507	0.935	0.462	0	Macrophages
RGS1	0	1.52373	0.835	0.237	0	Macrophages
LILRB4	0	1.52341	0.67	0.017	0	Macrophages
C1orf162	0	1.52326	0.725	0.064	0	Macrophages
DAB2	0	1.51031	0.678	0.108	0	Macrophages
KCTD12	0	1.49581	0.747	0.107	0	Macrophages
TREM2	0	1.49353	0.554	0.01	0	Macrophages
LY96	0	1.46678	0.784	0.113	0	Macrophages
CD4	0	1.46421	0.721	0.045	0	Macrophages
IGSF6	0	1.44699	0.564	0.014	0	Macrophages
RNF130	0	1.44571	0.822	0.349	0	Macrophages
VSIG4	0	1.41318	0.541	0.009	0	Macrophages
LAIR1	0	1.41214	0.686	0.036	0	Macrophages
CXCL16	0	1.37653	0.781	0.215	0	Macrophages
OLR1	0	1.35485	0.463	0.017	0	Macrophages
ACP5	0	1.34957	0.564	0.085	0	Macrophages
FYB1	0	1.34892	0.637	0.07	0	Macrophages
TPP1	0	1.34821	0.793	0.238	0	Macrophages
STAB1	0	1.32056	0.531	0.049	0	Macrophages
MGAT1	0	1.31695	0.797	0.312	0	Macrophages
RASSF4	0	1.31243	0.632	0.077	0	Macrophages
AC020656.1	0	1.30983	0.431	0.015	0	Macrophages
FPR3	0	1.29306	0.601	0.011	0	Macrophages
MFSD1	0	1.28847	0.713	0.177	0	Macrophages
PYCARD	0	1.2663	0.823	0.297	0	Macrophages
ADA2	0	1.24432	0.57	0.021	0	Macrophages
TGFBI	0	1.24342	0.699	0.111	0	Macrophages
AKR1B1	0	1.23811	0.662	0.144	0	Macrophages
TMEM176A	0	1.23006	0.786	0.197	0	Macrophages
MAP3K8	0	1.19246	0.686	0.185	0	Macrophages
MMP19	0	1.18603	0.416	0.03	0	Macrophages
CLEC7A	0	1.18078	0.641	0.018	0	Macrophages
FCGR1A	0	1.17142	0.533	0.011	0	Macrophages
TNFRSF1B	0	1.15908	0.637	0.09	0	Macrophages
MPEG1	0	1.15782	0.556	0.014	0	Macrophages
GM2A	0	1.14256	0.56	0.074	0	Macrophages
CSTA	0	1.13308	0.567	0.067	0	Macrophages
PHACTR1	0	1.11864	0.574	0.074	0	Macrophages
LY86	0	1.11674	0.589	0.021	0	Macrophages
CPVL	0	1.11213	0.535	0.037	0	Macrophages
LCP2	0	1.11106	0.606	0.05	0	Macrophages
RAB20	0	1.10542	0.546	0.077	0	Macrophages
GPR34	0	1.1033	0.468	0.016	0	Macrophages
CCRL2	0	1.0858	0.511	0.03	0	Macrophages
IL18	0	1.08071	0.578	0.064	0	Macrophages
PLAU	0	1.07224	0.482	0.09	0	Macrophages
HCLS1	0	1.06998	0.636	0.091	0	Macrophages
CD53	0	1.06157	0.72	0.109	0	Macrophages
LGALS9	0	1.0583	0.621	0.123	0	Macrophages
IL1RN	0	1.03981	0.345	0.031	0	Macrophages
IL10	0	1.03202	0.34	0.011	0	Macrophages
SLC15A3	0	1.03082	0.508	0.031	0	Macrophages
ITGAX	0	1.02115	0.541	0.025	0	Macrophages
NRP2	0	1.01675	0.593	0.125	0	Macrophages
MIR155HG	0	1.01368	0.419	0.051	0	Macrophages
GPSM3	0	1.00962	0.718	0.166	0	Macrophages
CD84	0	1.00876	0.533	0.032	0	Macrophages
C3AR1	0	1.00719	0.497	0.016	0	Macrophages
RASGEF1B	0	1.00139	0.513	0.088	0	Macrophages
SGK1	5.95852e-306	1.67566	0.775	0.3	1.79197e-301	Macrophages
CREG1	5.18953e-299	1.50343	0.764	0.325	1.5607e-294	Macrophages
NR4A3	1.38416e-298	1.36759	0.688	0.211	4.16272e-294	Macrophages
HCST	4.54863e-298	1.03968	0.739	0.21	1.36795e-293	Macrophages
CFD	4.58548e-295	1.09281	0.701	0.229	1.37904e-290	Macrophages
CTSH	1.24978e-293	1.4598	0.805	0.362	3.75857e-289	Macrophages
ASAH1	2.0049e-292	1.55782	0.841	0.413	6.02954e-288	Macrophages
RGS10	7.69785e-292	1.31152	0.882	0.411	2.31505e-287	Macrophages
RBM47	1.3419e-284	1.02745	0.634	0.191	4.03564e-280	Macrophages
S100A11	1.35396e-283	1.49437	0.992	0.72	4.0719e-279	Macrophages
GLUL	1.15477e-282	1.65011	0.925	0.601	3.47285e-278	Macrophages
C3	1.95234e-281	1.17673	0.46	0.09	5.87147e-277	Macrophages
PDE4B	9.43566e-279	1.09933	0.629	0.175	2.83768e-274	Macrophages
PLIN2	2.64003e-277	1.60929	0.72	0.252	7.93963e-273	Macrophages
HLA-B	5.4167e-269	1.37362	1	0.731	1.62902e-264	Macrophages
THBD	2.59614e-267	1.15019	0.43	0.081	7.80764e-263	Macrophages
ITM2B	2.13424e-262	1.48865	0.988	0.808	6.4185e-258	Macrophages
SLC40A1	7.00188e-258	1.49859	0.532	0.136	2.10575e-253	Macrophages
G0S2	9.65757e-258	3.42179	0.6	0.196	2.90442e-253	Macrophages
ARPC1B	1.92903e-257	1.19926	0.854	0.418	5.80136e-253	Macrophages
TNF	1.27449e-252	1.45337	0.298	0.042	3.8329e-248	Macrophages
NFKB1	2.30049e-247	1.36039	0.713	0.273	6.9185e-243	Macrophages
ARL4C	5.87768e-244	1.09571	0.607	0.181	1.76765e-239	Macrophages
TMSB10	3.47303e-243	1.02269	1	0.997	1.04448e-238	Macrophages
CTSA	1.82586e-238	1.03353	0.692	0.26	5.4911e-234	Macrophages
UCP2	3.12745e-233	1.10503	0.686	0.23	9.4055e-229	Macrophages
MAFB	1.62408e-232	1.43652	0.783	0.352	4.88425e-228	Macrophages
MXD1	1.28137e-231	1.28735	0.555	0.173	3.85359e-227	Macrophages
GNAI2	6.94836e-231	1.08268	0.827	0.406	2.08965e-226	Macrophages
CEBPB	1.68654e-230	1.4469	0.864	0.525	5.07211e-226	Macrophages
B2M	9.56492e-230	1.28238	1	0.95	2.87655e-225	Macrophages
ABL2	1.46277e-229	1.17313	0.683	0.258	4.39914e-225	Macrophages
REL	1.27307e-223	1.29202	0.845	0.446	3.82864e-219	Macrophages
LGALS3	1.3914e-223	1.31024	0.854	0.398	4.18449e-219	Macrophages
TNFAIP3	1.01741e-217	1.53785	0.787	0.35	3.05976e-213	Macrophages
DUSP1	4.27618e-216	1.26833	0.942	0.651	1.28602e-211	Macrophages
SOCS3	1.07448e-214	1.08272	0.791	0.344	3.2314e-210	Macrophages
FNIP2	5.23519e-214	1.13955	0.693	0.299	1.57443e-209	Macrophages
INSIG1	1.61106e-206	1.7377	0.739	0.369	4.84511e-202	Macrophages
SDCBP	6.31412e-205	1.06523	0.903	0.599	1.89891e-200	Macrophages
HLA-E	1.09848e-202	1.01029	0.957	0.601	3.30358e-198	Macrophages
CD44	2.31826e-200	1.03324	0.831	0.385	6.97193e-196	Macrophages
NFKBIA	3.9098e-196	1.5033	0.95	0.773	1.17583e-191	Macrophages
NR4A2	9.48494e-196	1.18661	0.722	0.308	2.8525e-191	Macrophages
PLD3	1.08737e-195	1.52216	0.764	0.454	3.27016e-191	Macrophages
HLA-A	2.3093e-192	1.11243	0.994	0.738	6.945e-188	Macrophages
HLA-C	6.70783e-189	1.00242	0.991	0.748	2.01731e-184	Macrophages
SELENOP	9.29351e-184	2.94754	0.526	0.198	2.79493e-179	Macrophages
HSPA1A	9.08916e-180	1.27962	0.994	0.777	2.73347e-175	Macrophages
PRNP	3.61527e-169	1.09626	0.743	0.393	1.08726e-164	Macrophages
PNRC1	6.39088e-161	1.11428	0.913	0.693	1.92199e-156	Macrophages
LIMS1	5.46553e-159	1.01854	0.699	0.357	1.6437e-154	Macrophages
VAMP5	4.44493e-154	1.03888	0.662	0.288	1.33677e-149	Macrophages
RGS2	3.88485e-151	1.02374	0.731	0.36	1.16833e-146	Macrophages
SPP1	9.54097e-151	3.11483	0.323	0.08	2.86935e-146	Macrophages
PPIF	2.08574e-148	1.10633	0.581	0.264	6.27264e-144	Macrophages
HSPA6	1.94467e-147	1.01764	0.708	0.325	5.84841e-143	Macrophages
CHMP1B	6.59767e-147	1.10875	0.715	0.397	1.98418e-142	Macrophages
CSTB	6.66832e-147	1.25299	0.918	0.796	2.00543e-142	Macrophages
ATOX1	5.92887e-145	1.07004	0.892	0.737	1.78305e-140	Macrophages
KDM6B	6.47263e-145	1.00752	0.797	0.478	1.94658e-140	Macrophages
ATP1B3	4.25086e-133	1.09784	0.768	0.51	1.2784e-128	Macrophages
KLF6	1.4813e-130	1.14949	0.924	0.722	4.45485e-126	Macrophages
MT2A	1.06938e-82	1.17334	0.91	0.782	3.21605e-78	Macrophages
CCL5	0	3.27271	0.434	0.107	0	CD8+ T-cells
CXCR4	0	3.05638	0.652	0.279	0	CD8+ T-cells
IL7R	0	2.64483	0.471	0.078	0	CD8+ T-cells
CD7	0	2.54724	0.485	0.077	0	CD8+ T-cells
NKG7	0	2.53784	0.29	0.073	0	CD8+ T-cells
TRBC2	0	2.41246	0.516	0.091	0	CD8+ T-cells
CD3D	0	2.37226	0.529	0.057	0	CD8+ T-cells
TRAC	0	2.2177	0.482	0.072	0	CD8+ T-cells
IL32	0	2.21429	0.594	0.297	0	CD8+ T-cells
CD2	0	2.20504	0.484	0.041	0	CD8+ T-cells
CD52	0	2.16973	0.611	0.194	0	CD8+ T-cells
TRBC1	0	2.08575	0.302	0.037	0	CD8+ T-cells
CD3E	0	2.0347	0.498	0.046	0	CD8+ T-cells
DUSP2	0	2.02635	0.597	0.33	0	CD8+ T-cells
CST7	0	1.98119	0.379	0.066	0	CD8+ T-cells
HCST	0	1.87256	0.514	0.174	0	CD8+ T-cells
LTB	0	1.86912	0.342	0.062	0	CD8+ T-cells
RGS1	0	1.7753	0.48	0.216	0	CD8+ T-cells
SRGN	0	1.71607	0.663	0.379	0	CD8+ T-cells
ARHGDIB	0	1.51945	0.602	0.358	0	CD8+ T-cells
PTPRC	0	1.49634	0.417	0.101	0	CD8+ T-cells
CD48	0	1.49133	0.439	0.115	0	CD8+ T-cells
BTG1	0	1.48924	0.961	0.935	0	CD8+ T-cells
CYTIP	0	1.43335	0.376	0.084	0	CD8+ T-cells
SPOCK2	0	1.39838	0.355	0.067	0	CD8+ T-cells
CORO1A	0	1.38613	0.409	0.135	0	CD8+ T-cells
DOK2	0	1.38428	0.372	0.084	0	CD8+ T-cells
GZMM	0	1.18954	0.288	0.049	0	CD8+ T-cells
SLA	0	1.15381	0.258	0.047	0	CD8+ T-cells
LSP1	0	1.12252	0.358	0.125	0	CD8+ T-cells
RHOH	0	1.09187	0.316	0.094	0	CD8+ T-cells
CD37	0	1.08857	0.453	0.166	0	CD8+ T-cells
IL2RG	0	1.08552	0.296	0.072	0	CD8+ T-cells
SAMSN1	0	1.07641	0.345	0.116	0	CD8+ T-cells
RPS29	0	1.06912	0.997	0.995	0	CD8+ T-cells
CLEC2D	0	1.03008	0.272	0.07	0	CD8+ T-cells
FYB1	0	1.0059	0.276	0.055	0	CD8+ T-cells
TSC22D3	2.74076e-299	1.72536	0.694	0.561	8.24257e-295	CD8+ T-cells
ISG20	1.15867e-297	1.52386	0.518	0.309	3.48459e-293	CD8+ T-cells
CREM	2.11262e-294	1.79659	0.603	0.427	6.3535e-290	CD8+ T-cells
TUBA4A	9.40336e-269	1.68437	0.418	0.213	2.82797e-264	CD8+ T-cells
SOD1	7.69732e-259	1.06257	0.919	0.934	2.31489e-254	CD8+ T-cells
GMFG	1.13171e-253	1.12065	0.391	0.185	3.40349e-249	CD8+ T-cells
HLA-A	5.66199e-247	1.48935	0.772	0.743	1.70279e-242	CD8+ T-cells
SARAF	2.22028e-229	1.43245	0.787	0.789	6.67728e-225	CD8+ T-cells
ZFP36L2	4.83642e-229	1.62185	0.721	0.66	1.4545e-224	CD8+ T-cells
B2M	1.46524e-228	1.31116	0.934	0.955	4.40658e-224	CD8+ T-cells
HSP90AA1	4.41987e-218	1.06286	0.987	0.991	1.32923e-213	CD8+ T-cells
RGCC	1.26188e-210	1.57299	0.443	0.258	3.79499e-206	CD8+ T-cells
S100A4	9.66326e-200	1.22411	0.617	0.451	2.90613e-195	CD8+ T-cells
LEPROTL1	7.02805e-199	1.32872	0.475	0.33	2.11362e-194	CD8+ T-cells
SRSF7	3.30211e-197	1.09175	0.784	0.761	9.93076e-193	CD8+ T-cells
CACYBP	2.954e-191	1.18484	0.725	0.693	8.88386e-187	CD8+ T-cells
HLA-B	2.59665e-177	1.07793	0.757	0.738	7.80916e-173	CD8+ T-cells
HLA-C	7.09323e-165	1.06027	0.757	0.757	2.13322e-160	CD8+ T-cells
DUSP4	2.67382e-148	1.53248	0.379	0.24	8.04125e-144	CD8+ T-cells
FAM177A1	2.55334e-109	1.0435	0.628	0.626	7.67893e-105	CD8+ T-cells
CLEC2B	4.46688e-103	1.02609	0.293	0.175	1.34337e-98	CD8+ T-cells
YPEL5	7.84162e-90	1.07188	0.53	0.499	2.35829e-85	CD8+ T-cells
ZFP36	1.54571e-76	1.01833	0.7	0.695	4.64855e-72	CD8+ T-cells
PPP1R2	2.28628e-71	1.0559	0.467	0.437	6.87575e-67	CD8+ T-cells
ANXA1	1.75387e-20	1.08394	0.428	0.44	5.27458e-16	CD8+ T-cells
CCL4	7.70309e-16	1.20796	0.262	0.23	2.31663e-11	CD8+ T-cells
LYZ	0	3.21219	0.819	0.119	0	Monocytes
HLA-DRA	0	3.04234	0.987	0.377	0	Monocytes
TYROBP	0	2.92026	0.976	0.194	0	Monocytes
HLA-DPA1	0	2.893	0.906	0.278	0	Monocytes
AIF1	0	2.86495	0.863	0.101	0	Monocytes
IL1B	0	2.8337	0.567	0.085	0	Monocytes
LST1	0	2.65202	0.813	0.092	0	Monocytes
HLA-DRB1	0	2.61606	0.911	0.275	0	Monocytes
HLA-DQA1	0	2.46958	0.774	0.13	0	Monocytes
FCER1G	0	2.32652	0.895	0.151	0	Monocytes
HLA-DQB1	0	2.11992	0.791	0.168	0	Monocytes
EREG	0	1.93491	0.342	0.028	0	Monocytes
CTSS	0	1.8555	0.767	0.164	0	Monocytes
MS4A6A	0	1.82905	0.634	0.062	0	Monocytes
SERPINA1	0	1.6236	0.521	0.059	0	Monocytes
HLA-DQA2	0	1.58404	0.519	0.067	0	Monocytes
ITGB2	0	1.56463	0.652	0.116	0	Monocytes
CD68	0	1.51092	0.695	0.129	0	Monocytes
PLEK	0	1.385	0.553	0.054	0	Monocytes
HLA-DMB	0	1.37273	0.58	0.085	0	Monocytes
FCN1	0	1.3456	0.281	0.008	0	Monocytes
FCGR3A	0	1.34285	0.433	0.049	0	Monocytes
SPI1	0	1.34133	0.603	0.07	0	Monocytes
C1orf162	0	1.31613	0.556	0.078	0	Monocytes
LGALS2	0	1.21893	0.309	0.017	0	Monocytes
MS4A7	0	1.1689	0.512	0.068	0	Monocytes
RNASE6	0	1.10169	0.445	0.046	0	Monocytes
CYBB	0	1.05093	0.427	0.038	0	Monocytes
HLA-DPB1	1.01325e-297	3.0251	0.932	0.333	3.04725e-293	Monocytes
FCGR2A	4.39264e-297	1.12039	0.521	0.075	1.32104e-292	Monocytes
S100A8	3.16806e-296	3.25416	0.318	0.028	9.52763e-292	Monocytes
LAPTM5	6.10868e-288	1.76566	0.913	0.257	1.83712e-283	Monocytes
HLA-DRB5	4.30467e-282	2.05062	0.78	0.196	1.29459e-277	Monocytes
AC020656.1	5.21208e-282	1.19534	0.294	0.025	1.56748e-277	Monocytes
BCL2A1	2.09988e-278	1.81937	0.63	0.119	6.31518e-274	Monocytes
C15orf48	1.41926e-269	1.89166	0.551	0.097	4.26827e-265	Monocytes
S100A9	9.677e-267	3.72319	0.481	0.075	2.91026e-262	Monocytes
GPR183	2.61038e-265	2.06086	0.632	0.125	7.85044e-261	Monocytes
CD74	1.04167e-253	2.8785	0.989	0.551	3.1327e-249	Monocytes
CSTA	2.59327e-246	1.22816	0.475	0.076	7.79901e-242	Monocytes
C5AR1	4.60394e-244	1.3003	0.416	0.059	1.38459e-239	Monocytes
HLA-DMA	2.89018e-242	1.61668	0.75	0.205	8.69192e-238	Monocytes
OLR1	4.78862e-221	1.07218	0.275	0.028	1.44013e-216	Monocytes
TNFSF13B	3.57395e-220	1.024	0.468	0.08	1.07483e-215	Monocytes
C1QA	3.15103e-218	2.18403	0.525	0.105	9.47642e-214	Monocytes
C1QC	5.20198e-210	1.82769	0.436	0.073	1.56444e-205	Monocytes
PLAUR	6.10887e-204	1.72984	0.726	0.22	1.83718e-199	Monocytes
FTL	1.34641e-196	1.98532	1	0.997	4.04919e-192	Monocytes
CYBA	3.61848e-192	1.82863	0.926	0.458	1.08822e-187	Monocytes
C1QB	1.355e-187	2.12757	0.486	0.103	4.07502e-183	Monocytes
SRGN	6.85582e-185	1.59205	0.943	0.413	2.06182e-180	Monocytes
LSP1	5.6573e-173	1.4035	0.582	0.153	1.70138e-168	Monocytes
CD14	6.14397e-169	1.00133	0.346	0.056	1.84774e-164	Monocytes
CTSB	2.3484e-166	1.67234	0.85	0.415	7.06258e-162	Monocytes
TYMP	2.87952e-156	1.64264	0.795	0.365	8.65987e-152	Monocytes
FTH1	1.76667e-146	1.40553	1	0.999	5.31307e-142	Monocytes
CST3	1.32913e-145	1.85382	0.983	0.824	3.99723e-141	Monocytes
CAPG	5.2114e-145	1.25955	0.627	0.198	1.56728e-140	Monocytes
G0S2	4.1402e-143	3.14383	0.588	0.202	1.24512e-138	Monocytes
IL1RN	1.84843e-140	1.13823	0.257	0.038	5.55897e-136	Monocytes
HMOX1	5.12424e-137	1.44514	0.451	0.113	1.54107e-132	Monocytes
NPC2	7.96295e-136	1.49294	0.924	0.677	2.39478e-131	Monocytes
PSAP	1.90556e-133	1.51585	0.941	0.738	5.73078e-129	Monocytes
PLAC8	1.61408e-129	1.50674	0.283	0.05	4.85419e-125	Monocytes
GRN	3.13121e-126	1.30626	0.826	0.495	9.41681e-122	Monocytes
COTL1	5.30967e-123	1.61639	0.776	0.379	1.59683e-118	Monocytes
SAT1	1.10549e-119	1.26643	0.983	0.891	3.32466e-115	Monocytes
TMSB4X	3.6001e-116	1.25929	1	0.957	1.08269e-111	Monocytes
PYCARD	2.28795e-111	1.11086	0.691	0.308	6.88079e-107	Monocytes
VAMP8	3.33119e-110	1.17393	0.837	0.472	1.00182e-105	Monocytes
CCL3	5.91074e-109	1.9479	0.506	0.174	1.7776e-104	Monocytes
EMP3	2.13673e-108	1.34332	0.745	0.35	6.426e-104	Monocytes
CD83	3.03799e-108	1.41765	0.636	0.259	9.13645e-104	Monocytes
CTSZ	4.02387e-107	1.27918	0.749	0.432	1.21014e-102	Monocytes
ARPC1B	3.16125e-95	1.04099	0.767	0.427	9.50714e-91	Monocytes
PFN1	9.54912e-93	1.06025	0.976	0.949	2.8718e-88	Monocytes
SH3BGRL3	1.4309e-92	1.2176	0.959	0.896	4.30328e-88	Monocytes
S100A11	3.07397e-92	1.10949	0.969	0.724	9.24465e-88	Monocytes
ALOX5AP	7.80049e-91	1.11103	0.464	0.147	2.34592e-86	Monocytes
S100A4	1.13456e-88	1.165	0.845	0.469	3.41208e-84	Monocytes
RGS10	3.84253e-86	1.04241	0.749	0.421	1.1556e-81	Monocytes
CXCL8	4.88997e-86	1.54022	0.702	0.359	1.47061e-81	Monocytes
RNASET2	1.01537e-83	1.24429	0.774	0.497	3.05364e-79	Monocytes
SOD2	1.13898e-80	1.4254	0.756	0.491	3.42537e-76	Monocytes
NAMPT	6.85503e-80	1.32631	0.715	0.427	2.06158e-75	Monocytes
CCL20	9.14386e-80	1.62767	0.262	0.063	2.74993e-75	Monocytes
ARPC3	1.2172e-78	1.00631	0.909	0.798	3.6606e-74	Monocytes
LITAF	1.99053e-73	1.13631	0.789	0.524	5.98631e-69	Monocytes
ACTB	1.02212e-72	1.2184	0.998	0.981	3.07393e-68	Monocytes
APOC1	2.66805e-68	1.99112	0.488	0.22	8.02389e-64	Monocytes
IER3	4.72386e-65	1.04605	0.747	0.462	1.42065e-60	Monocytes
CTSH	1.86289e-56	1.03681	0.61	0.373	5.60245e-52	Monocytes
NINJ1	4.31336e-56	1.00259	0.682	0.464	1.2972e-51	Monocytes
PPIF	3.59917e-55	1.27853	0.505	0.27	1.08242e-50	Monocytes
RGS2	9.31381e-55	1.02191	0.645	0.368	2.80103e-50	Monocytes
CCL4	1.90801e-52	1.16026	0.477	0.229	5.73816e-48	Monocytes
HSPA1A	2.99537e-52	1.16375	0.937	0.782	9.00829e-48	Monocytes
STXBP2	4.48347e-50	1.1325	0.444	0.22	1.34836e-45	Monocytes
AREG	6.53686e-50	1.23597	0.497	0.248	1.96589e-45	Monocytes
CXCL3	1.28026e-49	1.43434	0.464	0.223	3.85025e-45	Monocytes
DUSP1	4.22627e-48	1.00992	0.83	0.658	1.27101e-43	Monocytes
CCL4L2	5.92037e-46	1.15668	0.327	0.129	1.78049e-41	Monocytes
APOE	1.27344e-40	1.87305	0.451	0.246	3.82976e-36	Monocytes
CTSD	1.41023e-40	1.5809	0.699	0.574	4.24114e-36	Monocytes
INSIG1	2.86652e-39	1.20925	0.571	0.378	8.62077e-35	Monocytes
GLUL	8.13182e-38	1.01516	0.75	0.61	2.44556e-33	Monocytes
CSTB	2.27267e-20	1.01871	0.835	0.8	6.83482e-16	Monocytes
JCHAIN	0	4.86427	0.573	0.063	0	B-cells
CD79A	0	2.89548	0.829	0.063	0	B-cells
MZB1	0	2.51888	0.496	0.03	0	B-cells
DERL3	0	2.17204	0.496	0.043	0	B-cells
MS4A1	0	1.82383	0.381	0.009	0	B-cells
VPREB3	0	1.75633	0.388	0.017	0	B-cells
U62317.5	0	1.04234	0.303	0.018	0	B-cells
IGHM	8.54034e-243	5.49907	0.568	0.13	2.56842e-238	B-cells
IGKC	1.35694e-207	7.21612	0.917	0.556	4.08085e-203	B-cells
CYBA	8.75965e-198	1.50161	0.922	0.457	2.63438e-193	B-cells
ISG20	3.18614e-169	1.39531	0.787	0.332	9.582e-165	B-cells
CD74	1.75555e-165	1.95857	0.945	0.552	5.27964e-161	B-cells
CD37	2.89422e-156	1.83809	0.63	0.203	8.70408e-152	B-cells
IGHG1	4.24727e-151	6.33263	0.556	0.192	1.27732e-146	B-cells
HLA-DQA1	6.00846e-142	1.33879	0.501	0.136	1.80698e-137	B-cells
CCR7	1.63905e-136	1.6752	0.332	0.065	4.92927e-132	B-cells
CXCR4	9.01339e-135	1.34524	0.78	0.329	2.71069e-130	B-cells
IGHA1	6.81545e-132	3.86836	0.409	0.106	2.04968e-127	B-cells
IGHG3	1.20785e-123	5.96997	0.568	0.236	3.63249e-119	B-cells
CD48	1.09255e-122	1.33854	0.515	0.16	3.28575e-118	B-cells
IGLC3	1.57519e-121	6.77491	0.372	0.096	4.73721e-117	B-cells
HLA-DPA1	1.25536e-117	1.0545	0.69	0.283	3.77537e-113	B-cells
HERPUD1	2.02341e-113	1.78671	0.818	0.616	6.08521e-109	B-cells
HLA-DQB1	5.05804e-106	1.0577	0.515	0.175	1.52115e-101	B-cells
HLA-DRA	1.64534e-101	1.71313	0.728	0.382	4.9482e-97	B-cells
HLA-DRB1	8.96526e-100	1.07723	0.651	0.281	2.69621e-95	B-cells
IGHG4	2.40715e-89	5.25447	0.57	0.301	7.23925e-85	B-cells
CD52	3.69778e-84	1.10606	0.603	0.254	1.11207e-79	B-cells
LTB	9.48654e-83	1.14084	0.347	0.102	2.85298e-78	B-cells
FKBP11	1.36061e-82	1.62179	0.474	0.211	4.09188e-78	B-cells
IGLC2	1.29174e-75	6.90812	0.594	0.326	3.88479e-71	B-cells
HLA-DPB1	3.12943e-73	1.17198	0.638	0.34	9.41144e-69	B-cells
LAPTM5	1.18249e-70	1.06002	0.586	0.264	3.55623e-66	B-cells
TSC22D3	2.08952e-65	1.01352	0.78	0.578	6.28402e-61	B-cells
CD69	6.16464e-57	1.15662	0.307	0.105	1.85395e-52	B-cells
CD83	1.07233e-55	1.73034	0.494	0.262	3.22494e-51	B-cells
SSR4	5.09951e-15	1.19737	0.831	0.923	1.53363e-10	B-cells
TPSAB1	0	7.02465	0.973	0.093	0	Mast
TPSB2	0	6.70597	0.977	0.179	0	Mast
CPA3	0	4.45774	0.956	0.035	0	Mast
LTC4S	0	3.07763	0.939	0.238	0	Mast
BIRC3	0	3.0389	0.886	0.28	0	Mast
MS4A2	0	2.9107	0.892	0.014	0	Mast
AREG	0	2.88364	0.797	0.23	0	Mast
ID2	0	2.84523	0.929	0.553	0	Mast
NFKBIA	0	2.73927	0.972	0.771	0	Mast
HPGDS	0	2.62488	0.858	0.017	0	Mast
ALOX5AP	0	2.61902	0.932	0.119	0	Mast
SRGN	0	2.55294	0.993	0.4	0	Mast
GATA2	0	2.50266	0.812	0.272	0	Mast
SELENOK	0	2.42355	0.942	0.432	0	Mast
RGS2	0	2.38367	0.892	0.351	0	Mast
CD52	0	2.26924	0.904	0.234	0	Mast
REL	0	2.21139	0.874	0.442	0	Mast
FCER1G	0	2.20417	0.922	0.135	0	Mast
RAC2	0	2.1921	0.904	0.144	0	Mast
ANXA1	0	2.15171	0.93	0.416	0	Mast
CD44	0	2.14303	0.938	0.378	0	Mast
FXYD5	0	2.13623	0.96	0.455	0	Mast
HPGD	0	2.13434	0.713	0.165	0	Mast
CD83	0	2.09985	0.843	0.242	0	Mast
SLC18A2	0	2.09298	0.781	0.011	0	Mast
NSMCE1	0	2.09185	0.849	0.443	0	Mast
RGS13	0	2.05674	0.716	0.013	0	Mast
CLU	0	2.0531	0.962	0.41	0	Mast
BCL2A1	0	2.0457	0.743	0.104	0	Mast
CD69	0	2.01977	0.596	0.088	0	Mast
S100A4	0	1.99541	0.982	0.455	0	Mast
AL157895.1	0	1.93216	0.734	0.006	0	Mast
DDIT4	0	1.9021	0.832	0.414	0	Mast
CAPG	0	1.8526	0.817	0.181	0	Mast
CD37	0	1.82545	0.878	0.183	0	Mast
THAP2	0	1.81344	0.601	0.179	0	Mast
TYROBP	0	1.80864	0.946	0.18	0	Mast
VIM	0	1.80589	0.985	0.585	0	Mast
LAPTM5	0	1.78103	0.924	0.243	0	Mast
PLAUR	0	1.76033	0.739	0.209	0	Mast
KIT	0	1.73865	0.68	0.023	0	Mast
PTGS2	0	1.71744	0.662	0.168	0	Mast
RGS1	0	1.71278	0.818	0.234	0	Mast
LAT	0	1.69192	0.74	0.075	0	Mast
VWA5A	0	1.67578	0.67	0.031	0	Mast
CREM	0	1.66712	0.861	0.438	0	Mast
DUSP6	0	1.66685	0.621	0.19	0	Mast
ARHGDIB	0	1.64809	0.945	0.373	0	Mast
SAMSN1	0	1.64574	0.778	0.125	0	Mast
SH3BGRL3	0	1.63032	0.982	0.894	0	Mast
HDC	0	1.61895	0.621	0.019	0	Mast
MAP3K8	0	1.59068	0.697	0.181	0	Mast
RGS10	0	1.49925	0.851	0.409	0	Mast
DUSP10	0	1.48843	0.631	0.116	0	Mast
IL1RL1	0	1.47881	0.606	0.011	0	Mast
CKLF	0	1.46556	0.831	0.408	0	Mast
PLK3	0	1.45533	0.687	0.208	0	Mast
RHOG	0	1.42853	0.781	0.319	0	Mast
BHLHE40	0	1.42059	0.734	0.251	0	Mast
RHEX	0	1.41531	0.521	0.005	0	Mast
NFKBID	0	1.37375	0.65	0.178	0	Mast
PTGS1	0	1.3507	0.579	0.037	0	Mast
ACSL4	0	1.28455	0.558	0.092	0	Mast
CALB2	0	1.28096	0.509	0.013	0	Mast
TMEM233	0	1.27376	0.483	0.018	0	Mast
SMYD3	0	1.27219	0.628	0.196	0	Mast
GPR65	0	1.26568	0.521	0.052	0	Mast
LAT2	0	1.25375	0.585	0.056	0	Mast
RPL36AL	0	1.24543	0.989	0.961	0	Mast
TDRD3	0	1.23814	0.512	0.063	0	Mast
CD82	0	1.23167	0.637	0.171	0	Mast
STX11	0	1.19547	0.589	0.09	0	Mast
FTH1	0	1.18966	1	0.999	0	Mast
LIF	0	1.18031	0.465	0.051	0	Mast
RASSF5	0	1.16476	0.571	0.108	0	Mast
CNRIP1	0	1.14101	0.536	0.076	0	Mast
IL18	0	1.12835	0.516	0.064	0	Mast
RHOH	0	1.12129	0.616	0.108	0	Mast
GRAP2	0	1.11062	0.489	0.016	0	Mast
BTK	0	1.1002	0.469	0.024	0	Mast
CSF1	0	1.08142	0.415	0.076	0	Mast
MAOB	0	1.05743	0.504	0.056	0	Mast
AC020571.1	0	1.05513	0.374	0.008	0	Mast
SVOPL	0	1.05387	0.432	0.005	0	Mast
C1orf162	0	1.05255	0.528	0.069	0	Mast
MSRA	0	1.04486	0.525	0.101	0	Mast
ALOX5	0	1.00334	0.444	0.048	0	Mast
LEO1	3.82297e-300	1.3227	0.489	0.122	1.14972e-295	Mast
TNFAIP8	1.22242e-297	1.15812	0.591	0.168	3.67632e-293	Mast
CTSD	1.57514e-284	1.20425	0.883	0.563	4.73707e-280	Mast
LMNA	7.6555e-278	1.72873	0.93	0.665	2.30231e-273	Mast
OSTF1	6.18551e-262	1.1241	0.654	0.251	1.86023e-257	Mast
EMP3	1.64923e-258	1.21681	0.794	0.34	4.95988e-254	Mast
B2M	4.535e-255	1.2524	0.999	0.949	1.36386e-250	Mast
NOP53	1.42746e-245	1.13995	0.916	0.564	4.29293e-241	Mast
SOCS1	3.68551e-236	1.65101	0.628	0.258	1.10838e-231	Mast
B4GALT5	5.83985e-235	1.12483	0.57	0.211	1.75628e-230	Mast
CD63	4.96496e-227	1.03091	0.979	0.897	1.49316e-222	Mast
ELL2	6.90733e-225	1.05208	0.612	0.24	2.07731e-220	Mast
EHD1	1.71267e-209	1.14226	0.579	0.226	5.15069e-205	Mast
GLUL	2.54973e-208	1.45388	0.828	0.603	7.66806e-204	Mast
NFKB1	1.59292e-198	1.13984	0.626	0.274	4.79056e-194	Mast
MAPK6	5.9949e-189	1.07025	0.535	0.218	1.80291e-184	Mast
RNF145	1.7257e-188	1.16925	0.758	0.512	5.18988e-184	Mast
SDCBP	1.82599e-185	1.19432	0.827	0.601	5.4915e-181	Mast
KDM6B	1.82859e-180	1.22659	0.752	0.478	5.49929e-176	Mast
NFKBIZ	7.87718e-145	1.05321	0.641	0.359	2.36898e-140	Mast
CDC42EP3	3.38476e-142	1.1076	0.634	0.366	1.01793e-137	Mast
HSPA5	3.87422e-81	1.01686	0.75	0.628	1.16513e-76	Mast
DUSP1	1.52951e-67	1.02281	0.812	0.655	4.59984e-63	Mast
FDX1	1.26185e-38	1.00853	0.471	0.379	3.79488e-34	Mast

## Sheet: OS_ssGSEA_Score
cell	CELL_DEATH_IN_RESPONSE_TO_OXIDATIVE_STRESS	CELLULAR_OXIDANT_DETOXIFICATION	RESPONSE_TO_OXIDATIVE_STRESS	Celltype	Majortype
P1_AAACCTGAGAGCTATA.1	1.69728	1.2874	1.64414	Fibroblasts_3	Fibroblasts
P1_AAACCTGAGTGTTTGC.1	1.60066	1.19633	1.6246	Epithelial cells_8	Epithelial cells
P1_AAACCTGCAGTCAGCC.1	1.75525	1.2466	1.64739	Epithelial cells_7	Epithelial cells
P1_AAACCTGGTACATGTC.1	1.65476	1.26742	1.62982	Epithelial cells_1	Epithelial cells
P1_AAACCTGGTCGGCATC.1	1.66166	1.33656	1.67413	Epithelial cells_8	Epithelial cells
P1_AAACCTGGTGCAGACA.1	1.63088	1.37875	1.66005	Epithelial cells_8	Epithelial cells
P1_AAACCTGTCATTCACT.1	1.67601	1.23146	1.6894	Epithelial cells_8	Epithelial cells
P1_AAACCTGTCTTGAGGT.1	1.54315	1.17701	1.58131	Epithelial cells_12	Epithelial cells
P1_AAACGGGAGAGCCTAG.1	1.65603	1.21077	1.6524	Epithelial cells_12	Epithelial cells
P1_AAACGGGCAATAAGCA.1	1.62887	1.29417	1.61857	Epithelial cells_11	Epithelial cells
P1_AAACGGGGTAGGCATG.1	1.61466	1.39944	1.63594	Epithelial cells_10	Epithelial cells
P1_AAACGGGGTCGACTAT.1	1.67508	1.26376	1.65343	Epithelial cells_8	Epithelial cells
P1_AAACGGGGTCGATTGT.1	1.71027	1.25869	1.65674	Myofibroblasts_5	Myofibroblasts
P1_AAACGGGTCAGCTTAG.1	1.51958	1.1869	1.57791	Epithelial cells_12	Epithelial cells
P1_AAAGATGAGACCTTTG.1	1.58342	1.30698	1.67241	Endothelial cells_6	Endothelial cells
P1_AAAGATGCACCAGATT.1	1.55332	1.09271	1.54693	Epithelial cells_11	Epithelial cells
P1_AAAGATGGTAGCGTGA.1	1.64607	1.16746	1.64341	Myofibroblasts_5	Myofibroblasts
P1_AAAGATGGTTACCAGT.1	1.60354	1.24746	1.54539	Macrophages_14	Macrophages
P1_AAAGATGTCGACCAGC.1	1.58889	1.24162	1.56774	Epithelial cells_8	Epithelial cells
P1_AAAGCAAAGACTACAA.1	1.7696	1.27868	1.70604	Epithelial cells_8	Epithelial cells
P1_AAAGCAAAGAGGTAGA.1	1.56814	1.22612	1.66788	Endothelial cells_6	Endothelial cells
P1_AAAGCAAAGCTATGCT.1	1.56899	1.2179	1.58026	CD8+ T-cells_2	CD8+ T-cells
P1_AAAGCAACACCGGAAA.1	1.65413	1.11969	1.51195	Epithelial cells_7	Epithelial cells
P1_AAAGCAATCGCTAGCG.1	1.68306	1.27646	1.60428	Epithelial cells_12	Epithelial cells
P1_AAAGCAATCTCAACTT.1	1.63868	1.19934	1.65108	Epithelial cells_7	Epithelial cells
P1_AAAGCAATCTCTTATG.1	1.58954	1.12218	1.56027	Epithelial cells_1	Epithelial cells
P1_AAAGTAGAGACTAGGC.1	1.69449	1.19956	1.60328	Fibroblasts_3	Fibroblasts
P1_AAAGTAGAGCTGAAAT.1	1.6185	1.37201	1.61847	Epithelial cells_7	Epithelial cells
P1_AAAGTAGAGCTGCCCA.1	1.5578	1.2744	1.59568	Epithelial cells_11	Epithelial cells
P1_AAAGTAGCATCTCGCT.1	1.67886	1.13536	1.57379	Epithelial cells_11	Epithelial cells
P1_AAAGTAGGTCACCCAG.1	1.74066	1.24599	1.64752	Monocytes_15	Monocytes
P1_AAAGTAGGTCCGTCAG.1	1.59073	1.17305	1.60126	Epithelial cells_12	Epithelial cells
P1_AAAGTAGTCATAGCAC.1	1.66001	1.21524	1.59598	Epithelial cells_11	Epithelial cells
P1_AAAGTAGTCCACGTTC.1	1.68098	1.25919	1.60731	Epithelial cells_13	Epithelial cells
P1_AAAGTAGTCGTTTATC.1	1.65081	1.17091	1.57218	Epithelial cells_1	Epithelial cells
P1_AAATGCCAGCCCAACC.1	1.76985	1.1872	1.60777	Epithelial cells_8	Epithelial cells
P1_AAATGCCAGGATCGCA.1	1.70795	1.30937	1.59445	Epithelial cells_13	Epithelial cells
P1_AAATGCCAGGCAGTCA.1	1.56912	1.12006	1.62728	Myofibroblasts_5	Myofibroblasts
P1_AAATGCCCATCCGGGT.1	1.68761	1.12477	1.57035	B-cells_21	B-cells
P1_AAATGCCCATCGACGC.1	1.65841	1.17006	1.66013	Epithelial cells_7	Epithelial cells
P1_AAATGCCGTCCTAGCG.1	1.61898	1.25106	1.5776	Epithelial cells_11	Epithelial cells
P1_AAATGCCGTTCAGACT.1	1.64484	1.10553	1.61341	Epithelial cells_11	Epithelial cells
P1_AAATGCCTCGCTTAGA.1	1.5905	1.14124	1.53057	Epithelial cells_11	Epithelial cells
P1_AACACGTAGCAGACTG.1	1.62103	1.10932	1.59927	CD8+ T-cells_4	CD8+ T-cells
P1_AACACGTCAAGGGTCA.1	1.63879	1.21966	1.5874	CD8+ T-cells_2	CD8+ T-cells
P1_AACACGTCACACTGCG.1	1.68667	1.30311	1.65887	Monocytes_15	Monocytes
P1_AACACGTCAGATAATG.1	1.66372	1.23675	1.5594	Epithelial cells_11	Epithelial cells
P1_AACACGTCAGTACACT.1	1.6751	1.19589	1.65295	Epithelial cells_11	Epithelial cells
P1_AACACGTTCACTATTC.1	1.78184	1.29949	1.68854	Epithelial cells_8	Epithelial cells
P1_AACACGTTCATTTGGG.1	1.63563	1.09764	1.57176	Epithelial cells_11	Epithelial cells
P1_AACACGTTCCTTTCGG.1	1.70124	1.26231	1.69987	Epithelial cells_10	Epithelial cells
P1_AACCATGAGAAACCTA.1	1.6844	1.18141	1.59609	Epithelial cells_12	Epithelial cells
P1_AACCATGAGTCACGCC.1	1.66025	1.22292	1.62412	Epithelial cells_10	Epithelial cells
P1_AACCATGCAATGGAAT.1	1.66915	1.22701	1.57749	Epithelial cells_11	Epithelial cells
P1_AACCATGGTCCCGACA.1	1.77698	1.32017	1.68243	Epithelial cells_8	Epithelial cells
P1_AACCGCGAGAACTGTA.1	1.6477	1.16654	1.57909	Epithelial cells_12	Epithelial cells
P1_AACCGCGAGACTAGGC.1	1.6432	1.17111	1.63603	Epithelial cells_8	Epithelial cells
P1_AACCGCGAGCAATATG.1	1.74317	1.20621	1.60083	Epithelial cells_18	Epithelial cells
P1_AACCGCGCAAGCGATG.1	1.53833	1.25027	1.5498	Epithelial cells_0	Epithelial cells
P1_AACCGCGCACGAAGCA.1	1.54363	1.29355	1.62002	Endothelial cells_6	Endothelial cells
P1_AACCGCGCATCGACGC.1	1.53616	1.15716	1.61075	Epithelial cells_12	Epithelial cells
P1_AACCGCGGTACCATCA.1	1.71758	1.19117	1.65105	CD8+ T-cells_4	CD8+ T-cells
P1_AACCGCGGTCGCGAAA.1	1.62456	1.30802	1.63835	Fibroblasts_3	Fibroblasts
P1_AACCGCGGTCGGCTCA.1	1.61874	1.18933	1.63018	Epithelial cells_1	Epithelial cells
P1_AACCGCGTCCAAACAC.1	1.67821	1.1901	1.64726	Epithelial cells_10	Epithelial cells
P1_AACCGCGTCCTTTCTC.1	1.58311	1.15682	1.55955	CD8+ T-cells_2	CD8+ T-cells
P1_AACGTTGAGTTAAGTG.1	1.5928	1.19223	1.62929	Epithelial cells_10	Epithelial cells
P1_AACGTTGCAAGACGTG.1	1.66609	1.35069	1.6115	Epithelial cells_7	Epithelial cells
P1_AACGTTGGTAGGACAC.1	1.72416	1.35652	1.68635	Epithelial cells_8	Epithelial cells
P1_AACGTTGTCGGATGGA.1	1.68051	1.34813	1.67574	Macrophages_14	Macrophages
P1_AACGTTGTCGGTGTCG.1	1.75262	1.47283	1.75705	Fibroblasts_3	Fibroblasts
P1_AACTCAGAGACGCACA.1	1.58034	1.22371	1.62443	Epithelial cells_12	Epithelial cells
P1_AACTCAGAGGACAGAA.1	1.66939	1.31982	1.58607	Epithelial cells_10	Epithelial cells
P1_AACTCAGAGTTGTCGT.1	1.7211	1.24852	1.65324	Epithelial cells_8	Epithelial cells
P1_AACTCAGCAAAGTCAA.1	1.61306	1.19952	1.56682	Epithelial cells_11	Epithelial cells
P1_AACTCAGCACGAAAGC.1	1.74132	1.13098	1.63771	Epithelial cells_7	Epithelial cells
P1_AACTCAGCAGATTGCT.1	1.67548	1.16836	1.6323	Epithelial cells_11	Epithelial cells
P1_AACTCAGCAGCCACCA.1	1.72493	1.25296	1.62617	Epithelial cells_7	Epithelial cells
P1_AACTCAGGTAAGTGGC.1	1.64906	1.2515	1.60029	Epithelial cells_12	Epithelial cells
P1_AACTCAGGTAGAGTGC.1	1.57476	1.30859	1.61915	Epithelial cells_7	Epithelial cells
P1_AACTCAGGTTGACGTT.1	1.69675	1.16999	1.61122	Epithelial cells_10	Epithelial cells
P1_AACTCAGTCACCGTAA.1	1.49174	1.2502	1.53004	Epithelial cells_18	Epithelial cells
P1_AACTCCCAGTACATGA.1	1.65516	1.19594	1.57511	Epithelial cells_18	Epithelial cells
P1_AACTCCCCAAGAGTCG.1	1.57073	1.20245	1.58904	Epithelial cells_1	Epithelial cells
P1_AACTCCCCAGGAACGT.1	1.64437	1.20616	1.61224	Monocytes_15	Monocytes
P1_AACTCCCCATTGGGCC.1	1.59279	1.2904	1.65569	Epithelial cells_8	Epithelial cells
P1_AACTCCCGTCGACTAT.1	1.59462	1.09891	1.57903	CD8+ T-cells_4	CD8+ T-cells
P1_AACTCCCGTCGCTTCT.1	1.56938	1.24949	1.5652	CD8+ T-cells_2	CD8+ T-cells
P1_AACTCCCGTCTGCGGT.1	1.70824	1.25883	1.61585	Epithelial cells_8	Epithelial cells
P1_AACTCCCGTTCTGTTT.1	1.60555	1.19593	1.65898	Epithelial cells_8	Epithelial cells
P1_AACTCCCTCAATCTCT.1	1.58394	1.26161	1.61512	Epithelial cells_11	Epithelial cells
P1_AACTCTTAGACCACGA.1	1.62796	1.14327	1.64816	Epithelial cells_11	Epithelial cells
P1_AACTCTTAGCTGTTCA.1	1.62095	1.21588	1.57543	Epithelial cells_0	Epithelial cells
P1_AACTCTTCACAGGCCT.1	1.76126	1.18308	1.65125	CD8+ T-cells_4	CD8+ T-cells
P1_AACTCTTCACCAGGTC.1	1.64556	1.22427	1.65164	Epithelial cells_11	Epithelial cells
P1_AACTCTTCACCGATAT.1	1.69681	1.18025	1.61299	Epithelial cells_1	Epithelial cells
P1_AACTCTTCAGCCAATT.1	1.70835	1.19096	1.55541	Epithelial cells_11	Epithelial cells
P1_AACTGGTCACAAGTAA.1	1.73335	1.31803	1.61908	Epithelial cells_7	Epithelial cells
P1_AACTGGTCATTCACTT.1	1.65974	1.2081	1.62961	Myofibroblasts_5	Myofibroblasts
P1_AACTGGTGTTAGATGA.1	1.71594	1.19796	1.60647	B-cells_21	B-cells
P1_AACTGGTTCATGCTCC.1	1.61622	1.15107	1.64376	Epithelial cells_1	Epithelial cells
P1_AACTGGTTCCCAAGTA.1	1.51511	1.07477	1.56485	Epithelial cells_10	Epithelial cells
P1_AACTGGTTCCTCATTA.1	1.65802	1.10536	1.605	CD8+ T-cells_4	CD8+ T-cells
P1_AACTGGTTCGATGAGG.1	1.58208	1.14505	1.54172	CD8+ T-cells_2	CD8+ T-cells
P1_AACTTTCAGAACTGTA.1	1.63775	1.16772	1.58642	CD8+ T-cells_2	CD8+ T-cells
P1_AACTTTCAGATAGCAT.1	1.60344	1.09887	1.57052	Epithelial cells_11	Epithelial cells
P1_AACTTTCAGGTACTCT.1	1.71202	1.35553	1.61745	Mast_9	Mast
P1_AACTTTCAGTACGCGA.1	1.60939	1.17821	1.66272	Endothelial cells_6	Endothelial cells
P1_AACTTTCAGTCACGCC.1	1.66711	1.17927	1.60564	Epithelial cells_12	Epithelial cells
P1_AACTTTCAGTGGACGT.1	1.61748	1.17147	1.57984	Epithelial cells_11	Epithelial cells
P1_AACTTTCAGTGGGATC.1	1.66368	1.15532	1.62404	Epithelial cells_8	Epithelial cells
P1_AACTTTCCAAGAAAGG.1	1.56343	1.26443	1.63052	Epithelial cells_10	Epithelial cells
P1_AACTTTCCATGCAACT.1	1.52947	1.21156	1.54593	Epithelial cells_11	Epithelial cells
P1_AACTTTCGTCCCTACT.1	1.69123	1.08816	1.55702	Epithelial cells_13	Epithelial cells
P1_AACTTTCGTGTGAAAT.1	1.53149	1.23263	1.553	Epithelial cells_11	Epithelial cells
P1_AACTTTCTCACATACG.1	1.64689	1.29584	1.64636	Epithelial cells_13	Epithelial cells
P1_AAGACCTAGCTACCTA.1	1.57716	1.1826	1.60944	Epithelial cells_0	Epithelial cells
P1_AAGACCTCAATCACAC.1	1.65742	1.16933	1.64365	Epithelial cells_12	Epithelial cells
P1_AAGACCTCAATTCCTT.1	1.6264	1.27795	1.67238	Epithelial cells_10	Epithelial cells
P1_AAGACCTCACCGATAT.1	1.60788	1.18472	1.57432	Epithelial cells_0	Epithelial cells
P1_AAGACCTCATTACCTT.1	1.64981	1.21844	1.56633	Epithelial cells_0	Epithelial cells
P1_AAGACCTGTAAACACA.1	1.66417	1.24316	1.64346	Epithelial cells_8	Epithelial cells
P1_AAGACCTTCATTGCCC.1	1.73525	1.13609	1.59686	Epithelial cells_7	Epithelial cells
P1_AAGACCTTCTAAGCCA.1	1.67069	1.25065	1.60192	Epithelial cells_11	Epithelial cells
P1_AAGCCGCAGGAGTCTG.1	1.73007	1.30271	1.67087	Epithelial cells_7	Epithelial cells
P1_AAGCCGCAGTGACATA.1	1.62741	1.15337	1.63394	Endothelial cells_6	Endothelial cells
P1_AAGCCGCCAAGCCATT.1	1.65772	1.35069	1.65324	Epithelial cells_8	Epithelial cells
P1_AAGCCGCGTATCTGCA.1	1.69567	1.17673	1.60824	Epithelial cells_1	Epithelial cells
P1_AAGCCGCGTGCTTCTC.1	1.58149	1.23318	1.64426	Epithelial cells_8	Epithelial cells
P1_AAGCCGCGTGTGACCC.1	1.63454	1.26731	1.6479	Myofibroblasts_5	Myofibroblasts
P1_AAGCCGCGTTTAAGCC.1	1.68722	1.19245	1.59039	Macrophages_14	Macrophages
P1_AAGCCGCTCAAGGCTT.1	1.65278	1.3065	1.62767	B-cells_21	B-cells
P1_AAGCCGCTCACAAACC.1	1.7039	1.2074	1.57649	Epithelial cells_11	Epithelial cells
P1_AAGCCGCTCGCGGATC.1	1.70796	1.17285	1.62992	Epithelial cells_11	Epithelial cells
P1_AAGGAGCAGGCGACAT.1	1.72481	1.28104	1.65352	Epithelial cells_12	Epithelial cells
P1_AAGGAGCAGTTGTAGA.1	1.63004	1.34239	1.64308	Epithelial cells_8	Epithelial cells
P1_AAGGAGCCAAGTCTGT.1	1.58621	1.26196	1.56732	B-cells_21	B-cells
P1_AAGGAGCCACTACAGT.1	1.71505	1.31964	1.64268	Epithelial cells_11	Epithelial cells
P1_AAGGAGCGTATAGTAG.1	1.73428	1.4241	1.70636	Epithelial cells_8	Epithelial cells
P1_AAGGAGCGTGTTGAGG.1	1.65547	1.25089	1.57724	Epithelial cells_8	Epithelial cells
P1_AAGGAGCGTTCGTGAT.1	1.66945	1.17548	1.58099	B-cells_21	B-cells
P1_AAGGCAGAGGAATTAC.1	1.51563	1.12211	1.56997	CD8+ T-cells_2	CD8+ T-cells
P1_AAGGCAGCACATCTTT.1	1.66361	1.20052	1.62641	Epithelial cells_1	Epithelial cells
P1_AAGGCAGCAGACTCGC.1	1.66135	1.20204	1.61873	Epithelial cells_1	Epithelial cells
P1_AAGGCAGCAGCTGTGC.1	1.64798	1.24943	1.65301	Endothelial cells_6	Endothelial cells
P1_AAGGCAGCATCACGAT.1	1.78039	1.26966	1.65639	Epithelial cells_11	Epithelial cells
P1_AAGGCAGGTTGCTCCT.1	1.6649	1.34325	1.64848	Endothelial cells_6	Endothelial cells
P1_AAGGCAGTCACAGGCC.1	1.65501	1.21825	1.57934	Epithelial cells_7	Epithelial cells
P1_AAGGCAGTCTCATTCA.1	1.61991	1.14635	1.59734	Epithelial cells_11	Epithelial cells
P1_AAGGTTCAGAACAATC.1	1.67922	1.17667	1.64365	Epithelial cells_10	Epithelial cells
P1_AAGGTTCAGAAGAAGC.1	1.64931	1.267	1.62165	Epithelial cells_8	Epithelial cells
P1_AAGGTTCCAAGCTGAG.1	1.64828	1.22415	1.60151	Epithelial cells_10	Epithelial cells
P1_AAGGTTCCACATTAGC.1	1.64988	1.19448	1.58149	CD8+ T-cells_4	CD8+ T-cells
P1_AAGGTTCGTAATCGTC.1	1.66385	1.31443	1.59132	Epithelial cells_12	Epithelial cells
P1_AAGGTTCTCATGCTCC.1	1.66325	1.30224	1.58856	Epithelial cells_10	Epithelial cells
P1_AAGGTTCTCGCAAACT.1	1.70814	1.22971	1.60745	Epithelial cells_0	Epithelial cells
P1_AAGTCTGAGACAGACC.1	1.55334	1.16607	1.52925	Epithelial cells_11	Epithelial cells
P1_AAGTCTGAGGAGTACC.1	1.66072	1.42147	1.66001	Epithelial cells_8	Epithelial cells
P1_AAGTCTGCATGAACCT.1	1.64441	1.3655	1.6739	Epithelial cells_8	Epithelial cells
P1_AAGTCTGGTCTAGTGT.1	1.73689	1.38311	1.64682	Epithelial cells_8	Epithelial cells
P1_AAGTCTGTCAGCGACC.1	1.66558	1.11095	1.58199	Epithelial cells_7	Epithelial cells
P1_AAGTCTGTCCACGTGG.1	1.64639	1.10629	1.57999	CD8+ T-cells_2	CD8+ T-cells
P1_AAGTCTGTCCAGTATG.1	1.58394	1.22151	1.55892	Epithelial cells_11	Epithelial cells
P1_AATCCAGAGGCAGTCA.1	1.60205	1.3534	1.64046	Macrophages_14	Macrophages
P1_AATCCAGCAGCCTTGG.1	1.63749	1.3345	1.6685	Macrophages_14	Macrophages
P1_AATCCAGGTGCGATAG.1	1.77601	1.28352	1.6799	Epithelial cells_8	Epithelial cells
P1_AATCCAGTCTGAAAGA.1	1.634	1.32394	1.65423	Epithelial cells_10	Epithelial cells
P1_AATCGGTAGATGGGTC.1	1.67693	1.20534	1.6525	Epithelial cells_11	Epithelial cells
P1_AATCGGTCAAGAAGAG.1	1.56718	1.20108	1.55042	Epithelial cells_0	Epithelial cells
P1_AATCGGTCAGGCAGTA.1	1.65666	1.246	1.59047	Epithelial cells_8	Epithelial cells
P1_AATCGGTCATGGAATA.1	1.67008	1.21515	1.59675	Epithelial cells_10	Epithelial cells
P1_AATCGGTGTAGCGTCC.1	1.5301	1.05835	1.52742	CD8+ T-cells_2	CD8+ T-cells
P1_AATCGGTGTCAAGCGA.1	1.61402	1.3082	1.63613	Epithelial cells_0	Epithelial cells
P1_AATCGGTGTCGGCACT.1	1.71572	1.16158	1.64112	Myofibroblasts_5	Myofibroblasts
P1_AATCGGTGTCTGATCA.1	1.54606	1.10809	1.57643	CD8+ T-cells_4	CD8+ T-cells
P1_AATCGGTTCAGAGGTG.1	1.60666	1.17604	1.55228	Epithelial cells_1	Epithelial cells
P1_AATCGGTTCCTTCAAT.1	1.69738	1.27205	1.68735	Endothelial cells_6	Endothelial cells
P1_AATCGGTTCTTTCCTC.1	1.68177	1.0733	1.57431	CD8+ T-cells_4	CD8+ T-cells
P1_ACACCAAAGACCGGAT.1	1.64387	1.23338	1.68917	Macrophages_26	Macrophages
P1_ACACCAAAGAGGGCTT.1	1.6519	1.1531	1.57067	Epithelial cells_10	Epithelial cells
P1_ACACCAAAGCGTAGTG.1	1.66438	1.23866	1.65413	Epithelial cells_8	Epithelial cells
P1_ACACCAAAGCTACCGC.1	1.72618	1.23515	1.64958	Epithelial cells_7	Epithelial cells
P1_ACACCAAAGCTTCGCG.1	1.65492	1.2039	1.58035	Epithelial cells_11	Epithelial cells
P1_ACACCAAAGTAGGTGC.1	1.60255	1.13723	1.57927	Myofibroblasts_5	Myofibroblasts
P1_ACACCAAGTACATGTC.1	1.66205	1.25452	1.60589	Epithelial cells_10	Epithelial cells
P1_ACACCAAGTCTACCTC.1	1.70152	1.22255	1.60934	CD8+ T-cells_2	CD8+ T-cells
P1_ACACCAAGTGCAACGA.1	1.66118	1.26978	1.59618	Epithelial cells_11	Epithelial cells
P1_ACACCAAGTTGATTCG.1	1.63957	1.13717	1.59449	Epithelial cells_12	Epithelial cells
P1_ACACCAAGTTGTGGCC.1	1.58298	1.20129	1.60595	Epithelial cells_0	Epithelial cells
P1_ACACCAATCTCATTCA.1	1.71129	1.28985	1.65998	Monocytes_15	Monocytes
P1_ACACCCTAGTGGCACA.1	1.56411	1.12162	1.5562	CD8+ T-cells_2	CD8+ T-cells
P1_ACACCCTCAAAGGCGT.1	1.73181	1.39247	1.67284	Epithelial cells_8	Epithelial cells
P1_ACACCCTCACACAGAG.1	1.58467	1.04844	1.54218	CD8+ T-cells_2	CD8+ T-cells
P1_ACACCCTCAGACGTAG.1	1.64169	1.2411	1.61699	Myofibroblasts_5	Myofibroblasts
P1_ACACCGGAGATCCCGC.1	1.75517	1.16056	1.64933	Epithelial cells_1	Epithelial cells
P1_ACACCGGAGGGAACGG.1	1.67039	1.34842	1.62273	Epithelial cells_8	Epithelial cells
P1_ACACCGGCACATTTCT.1	1.67266	1.17771	1.59722	Epithelial cells_13	Epithelial cells
P1_ACACCGGGTCCGTCAG.1	1.60995	1.2578	1.59994	Epithelial cells_10	Epithelial cells
P1_ACACCGGGTGTAACGG.1	1.51579	1.22423	1.55116	Epithelial cells_12	Epithelial cells
P1_ACACCGGTCCACGCAG.1	1.58943	1.04833	1.56578	Epithelial cells_11	Epithelial cells
P1_ACACCGGTCGGCTACG.1	1.69196	1.25563	1.63709	Epithelial cells_8	Epithelial cells
P1_ACACCGGTCTGGGCCA.1	1.60534	1.17314	1.55092	CD8+ T-cells_4	CD8+ T-cells
P1_ACACTGAAGAATAGGG.1	1.67895	1.35964	1.6273	Epithelial cells_10	Epithelial cells
P1_ACACTGAAGCAGGTCA.1	1.59095	1.17792	1.59642	CD8+ T-cells_2	CD8+ T-cells
P1_ACACTGAAGCGCCTCA.1	1.69914	1.29066	1.6466	Epithelial cells_10	Epithelial cells
P1_ACACTGACAATGGACG.1	1.73189	1.10097	1.60004	Epithelial cells_12	Epithelial cells
P1_ACACTGACAATTGCTG.1	1.56276	1.19558	1.57376	Epithelial cells_1	Epithelial cells
P1_ACACTGACAGTTCATG.1	1.63752	1.22571	1.60743	Epithelial cells_13	Epithelial cells
P1_ACACTGAGTAAGTGTA.1	1.60889	1.32491	1.59235	Epithelial cells_7	Epithelial cells
P1_ACACTGAGTGTGAATA.1	1.63155	1.29282	1.5909	Epithelial cells_8	Epithelial cells
P1_ACACTGATCACAAACC.1	1.51985	1.22611	1.62306	Fibroblasts_3	Fibroblasts
P1_ACACTGATCGCAAGCC.1	1.58122	1.18044	1.60922	CD8+ T-cells_2	CD8+ T-cells
P1_ACACTGATCGCAGGCT.1	1.68864	1.16154	1.64758	Endothelial cells_6	Endothelial cells
P1_ACACTGATCTATGTGG.1	1.68658	1.20551	1.59835	Epithelial cells_12	Epithelial cells
P1_ACACTGATCTGTACGA.1	1.6635	1.23657	1.57122	Epithelial cells_0	Epithelial cells
P1_ACAGCCGAGACATAAC.1	1.63826	1.2113	1.62972	Epithelial cells_8	Epithelial cells
P1_ACAGCCGAGCCACGTC.1	1.59965	1.26951	1.69201	Endothelial cells_6	Endothelial cells
P1_ACAGCCGAGCTGCAAG.1	1.70435	1.19183	1.56782	Epithelial cells_11	Epithelial cells
P1_ACAGCCGGTATAGGGC.1	1.63112	1.28053	1.61826	Epithelial cells_1	Epithelial cells
P1_ACAGCCGTCGCCAGCA.1	1.57101	1.17317	1.5475	Epithelial cells_12	Epithelial cells
P1_ACAGCCGTCGCGCCAA.1	1.65556	1.18351	1.66913	Epithelial cells_8	Epithelial cells
P1_ACAGCTAAGGCACATG.1	1.69858	1.26528	1.60644	Epithelial cells_12	Epithelial cells
P1_ACAGCTACAGGACGTA.1	1.68121	1.31865	1.61332	Epithelial cells_7	Epithelial cells
P1_ACAGCTACATGTAGTC.1	1.64325	1.14986	1.60964	Epithelial cells_10	Epithelial cells
P1_ACAGCTAGTCACTTCC.1	1.62723	1.08118	1.62424	CD8+ T-cells_2	CD8+ T-cells
P1_ACAGCTATCTTGTATC.1	1.46011	1.19987	1.56634	Epithelial cells_13	Epithelial cells
P1_ACATACGAGAGGTAGA.1	1.64882	1.11326	1.55676	Epithelial cells_0	Epithelial cells
P1_ACATACGAGATGCCTT.1	1.57574	1.13597	1.54263	CD8+ T-cells_4	CD8+ T-cells
P1_ACATACGAGCCAGTTT.1	1.5871	1.26866	1.72249	Macrophages_14	Macrophages
P1_ACATACGAGCTAACAA.1	1.65592	1.11022	1.6075	Macrophages_26	Macrophages
P1_ACATACGCAATCCGAT.1	1.64931	1.18469	1.61946	Epithelial cells_8	Epithelial cells
P1_ACATACGCATCACCCT.1	1.6267	1.18231	1.56369	Monocytes_15	Monocytes
P1_ACATACGTCCTGCAGG.1	1.68024	1.11493	1.62072	Epithelial cells_0	Epithelial cells
P1_ACATACGTCTGGAGCC.1	1.6155	1.28645	1.5855	Endothelial cells_6	Endothelial cells
P1_ACATCAGAGCAGCGTA.1	1.68019	1.19501	1.62155	CD8+ T-cells_2	CD8+ T-cells
P1_ACATCAGAGGGCTTGA.1	1.61319	1.16437	1.58857	Epithelial cells_10	Epithelial cells
P1_ACATCAGCAATGCCAT.1	1.62154	1.26439	1.71368	Myofibroblasts_5	Myofibroblasts
P1_ACATCAGGTCCAGTGC.1	1.70003	1.25657	1.6231	Epithelial cells_10	Epithelial cells
P1_ACATCAGGTGCAGACA.1	1.62299	1.33001	1.6274	Epithelial cells_8	Epithelial cells
P1_ACATCAGTCACTCTTA.1	1.7066	1.20287	1.61206	Epithelial cells_10	Epithelial cells
P1_ACATCAGTCATGTCTT.1	1.67717	1.21986	1.61767	Epithelial cells_7	Epithelial cells
P1_ACATCAGTCCACTCCA.1	1.58263	1.13876	1.59218	Epithelial cells_12	Epithelial cells
P1_ACATCAGTCTAACCGA.1	1.59879	1.15816	1.5953	CD8+ T-cells_4	CD8+ T-cells
P1_ACATGGTAGGCCCTCA.1	1.53651	1.18972	1.57814	Epithelial cells_11	Epithelial cells
P1_ACATGGTAGTCATCCA.1	1.70111	1.25797	1.68935	Epithelial cells_8	Epithelial cells
P1_ACATGGTAGTCCATAC.1	1.57614	1.23713	1.59329	CD8+ T-cells_2	CD8+ T-cells
P1_ACATGGTCAACAACCT.1	1.63739	1.1762	1.54025	Epithelial cells_12	Epithelial cells
P1_ACATGGTGTAGCGCAA.1	1.59905	1.31404	1.58509	Epithelial cells_11	Epithelial cells
P1_ACATGGTTCACGATGT.1	1.58687	1.36957	1.61577	Macrophages_14	Macrophages
P1_ACCAGTAAGCTTATCG.1	1.70812	1.32148	1.62298	Epithelial cells_11	Epithelial cells
P1_ACCAGTAAGGACAGAA.1	1.65122	1.14592	1.56199	CD8+ T-cells_2	CD8+ T-cells
P1_ACCAGTACAATCCGAT.1	1.59726	1.04228	1.53198	Epithelial cells_11	Epithelial cells
P1_ACCAGTACACCTCGTT.1	1.6509	1.19195	1.57168	Epithelial cells_12	Epithelial cells
P1_ACCAGTACATCCGTGG.1	1.65157	1.22732	1.60898	Epithelial cells_11	Epithelial cells
P1_ACCAGTACATGGGACA.1	1.72385	1.28779	1.69004	Epithelial cells_8	Epithelial cells
P1_ACCAGTAGTGTGTGCC.1	1.74916	1.25668	1.68055	Epithelial cells_11	Epithelial cells
P1_ACCAGTATCAATAAGG.1	1.68249	1.20892	1.60921	B-cells_21	B-cells
P1_ACCAGTATCTTCCTTC.1	1.56003	1.33635	1.58873	Epithelial cells_11	Epithelial cells
P1_ACCCACTAGGGTATCG.1	1.60666	1.18837	1.57398	Epithelial cells_11	Epithelial cells
P1_ACCCACTAGTCTTGCA.1	1.73829	1.21548	1.56276	Epithelial cells_11	Epithelial cells
P1_ACCCACTCAAAGAATC.1	1.65345	1.26815	1.60882	Epithelial cells_18	Epithelial cells
P1_ACCCACTCACGAAGCA.1	1.6089	1.13786	1.55811	Epithelial cells_11	Epithelial cells
P1_ACCCACTCACTCGACG.1	1.57411	1.17987	1.5565	B-cells_21	B-cells
P1_ACCCACTGTATTCGTG.1	1.63782	1.29246	1.59587	Mast_9	Mast
P1_ACCCACTGTGTATGGG.1	1.63159	1.23609	1.63894	CD8+ T-cells_2	CD8+ T-cells
P1_ACCCACTTCAACGAAA.1	1.65007	1.14342	1.65767	Monocytes_15	Monocytes
P1_ACCGTAACACAACGTT.1	1.54842	1.29305	1.57449	Epithelial cells_8	Epithelial cells
P1_ACCGTAACATTATCTC.1	1.71359	1.27141	1.65865	Fibroblasts_3	Fibroblasts
P1_ACCGTAAGTCAAACTC.1	1.63699	1.22506	1.67045	Fibroblasts_3	Fibroblasts
P1_ACCGTAATCGCAAACT.1	1.66735	1.20819	1.63592	Epithelial cells_8	Epithelial cells
P1_ACCGTAATCTGTCCGT.1	1.5814	1.18409	1.57598	CD8+ T-cells_2	CD8+ T-cells
P1_ACCGTAATCTTCAACT.1	1.59685	1.20778	1.62405	Epithelial cells_13	Epithelial cells
P1_ACCGTAATCTTGCCGT.1	1.63148	1.27202	1.63422	Epithelial cells_10	Epithelial cells
P1_ACCTTTAAGGCTAGAC.1	1.51585	1.18397	1.52728	Epithelial cells_12	Epithelial cells
P1_ACCTTTACAAAGAATC.1	1.57969	1.35721	1.61327	Epithelial cells_1	Epithelial cells
P1_ACCTTTACACAACTGT.1	1.67408	1.19913	1.62479	Monocytes_15	Monocytes
P1_ACCTTTACACAGACAG.1	1.62976	1.22291	1.6351	Epithelial cells_11	Epithelial cells
P1_ACCTTTACAGTCGATT.1	1.67427	1.22653	1.59668	Epithelial cells_7	Epithelial cells
P1_ACCTTTACATTGTGCA.1	1.76693	1.15165	1.61989	Epithelial cells_12	Epithelial cells
P1_ACCTTTAGTATTACCG.1	1.6485	1.21012	1.59209	Epithelial cells_11	Epithelial cells
P1_ACCTTTAGTCACAAGG.1	1.67787	1.13458	1.60037	Endothelial cells_6	Endothelial cells
P1_ACCTTTAGTGGACGAT.1	1.6726	1.16165	1.61228	Epithelial cells_1	Epithelial cells
P1_ACCTTTATCAGTTCGA.1	1.65404	1.28432	1.64804	Epithelial cells_7	Epithelial cells
P1_ACGAGCCAGAAACGAG.1	1.58403	1.34045	1.66554	Fibroblasts_3	Fibroblasts
P1_ACGAGCCAGATGTCGG.1	1.67885	1.18396	1.6109	Fibroblasts_3	Fibroblasts
P1_ACGAGCCAGGTAAACT.1	1.66236	1.29158	1.61561	Fibroblasts_19	Fibroblasts
P1_ACGAGCCCAACACGCC.1	1.59575	1.26564	1.59639	Epithelial cells_12	Epithelial cells
P1_ACGAGCCCAATAGCAA.1	1.61127	1.26706	1.64955	Epithelial cells_10	Epithelial cells
P1_ACGAGCCCACAAGTAA.1	1.6313	1.14776	1.61137	Epithelial cells_11	Epithelial cells
P1_ACGAGCCGTCAAAGCG.1	1.63531	1.23221	1.62968	Epithelial cells_11	Epithelial cells
P1_ACGAGCCTCATGCTCC.1	1.65656	1.15234	1.61311	Epithelial cells_0	Epithelial cells
P1_ACGAGCCTCCAGAAGG.1	1.73173	1.17924	1.60892	Epithelial cells_18	Epithelial cells
P1_ACGAGGACACCCAGTG.1	1.68044	1.18932	1.58827	Epithelial cells_11	Epithelial cells
P1_ACGAGGACACTCAGGC.1	1.59071	1.30605	1.6835	Endothelial cells_6	Endothelial cells
P1_ACGAGGACATATACCG.1	1.67719	1.20924	1.66488	Epithelial cells_8	Epithelial cells
P1_ACGAGGAGTAGCCTAT.1	1.61281	1.09346	1.59692	Epithelial cells_13	Epithelial cells
P1_ACGAGGAGTATATCCG.1	1.61045	1.26284	1.59252	Epithelial cells_0	Epithelial cells
P1_ACGAGGAGTATCAGTC.1	1.56122	1.07338	1.53383	CD8+ T-cells_2	CD8+ T-cells
P1_ACGAGGATCAAACGGG.1	1.64701	1.25774	1.57059	Epithelial cells_11	Epithelial cells
P1_ACGAGGATCAATCTCT.1	1.7022	1.21205	1.64545	Monocytes_15	Monocytes
P1_ACGAGGATCAGTGTTG.1	1.62973	1.26381	1.62472	Epithelial cells_1	Epithelial cells
P1_ACGAGGATCATAGCAC.1	1.63079	1.29297	1.59343	Epithelial cells_7	Epithelial cells
P1_ACGAGGATCGCGTAGC.1	1.69998	1.19101	1.61789	Epithelial cells_18	Epithelial cells
P1_ACGAGGATCGTGTAGT.1	1.55452	1.23666	1.5538	Epithelial cells_0	Epithelial cells
P1_ACGAGGATCTGCGTAA.1	1.68599	1.32594	1.63152	Epithelial cells_8	Epithelial cells
P1_ACGAGGATCTGCTTGC.1	1.75739	1.18468	1.61442	B-cells_21	B-cells
P1_ACGATACAGCCGATTT.1	1.52211	1.18675	1.54573	Epithelial cells_11	Epithelial cells
P1_ACGATACAGGGATGGG.1	1.69422	1.22265	1.66942	Epithelial cells_10	Epithelial cells
P1_ACGATACCAATGTAAG.1	1.59938	1.20433	1.59463	Epithelial cells_11	Epithelial cells
P1_ACGATACCACGAGAGT.1	1.74043	1.13824	1.59226	Epithelial cells_12	Epithelial cells
P1_ACGATACCACGGTAAG.1	1.58958	1.11895	1.60498	Endothelial cells_6	Endothelial cells
P1_ACGATACCAGATGAGC.1	1.59637	1.30446	1.68588	Myofibroblasts_5	Myofibroblasts
P1_ACGATACCATGTCGAT.1	1.69689	1.24602	1.64292	Macrophages_26	Macrophages
P1_ACGATACGTGATGTCT.1	1.58531	1.1773	1.55802	Epithelial cells_12	Epithelial cells
P1_ACGATACTCAAACGGG.1	1.64175	1.20012	1.60441	Epithelial cells_11	Epithelial cells
P1_ACGATACTCCAGTATG.1	1.61713	1.25932	1.58518	Epithelial cells_0	Epithelial cells
P1_ACGATACTCTTATCTG.1	1.65969	1.20826	1.5685	CD8+ T-cells_2	CD8+ T-cells
P1_ACGATGTAGCCTATGT.1	1.66166	1.24612	1.59509	Epithelial cells_13	Epithelial cells
P1_ACGATGTCAAGCTGTT.1	1.65498	1.26997	1.61437	Epithelial cells_0	Epithelial cells
P1_ACGATGTGTAAGTAGT.1	1.63724	1.05182	1.5633	CD8+ T-cells_4	CD8+ T-cells
P1_ACGATGTGTAGCGTAG.1	1.65183	1.16258	1.57383	Epithelial cells_10	Epithelial cells
P1_ACGATGTGTCGAATCT.1	1.63154	1.34157	1.664	Epithelial cells_8	Epithelial cells
P1_ACGATGTGTCTGCAAT.1	1.61926	1.22409	1.5892	Epithelial cells_11	Epithelial cells
P1_ACGATGTTCATACGGT.1	1.53639	1.14041	1.52322	CD8+ T-cells_4	CD8+ T-cells
P1_ACGCAGCAGGCTAGCA.1	1.60954	1.20567	1.59395	Epithelial cells_11	Epithelial cells
P1_ACGCAGCCAGCCTGTG.1	1.63568	1.19678	1.60069	Epithelial cells_7	Epithelial cells
P1_ACGCAGCCAGTCAGAG.1	1.65591	1.24657	1.65204	Epithelial cells_12	Epithelial cells
P1_ACGCAGCCATCACGTA.1	1.59354	1.18893	1.56418	Epithelial cells_10	Epithelial cells
P1_ACGCAGCGTGTAAGTA.1	1.47972	1.1517	1.55586	Epithelial cells_12	Epithelial cells
P1_ACGCCAGAGCGCTTAT.1	1.68226	1.16053	1.56867	Epithelial cells_7	Epithelial cells
P1_ACGCCAGCACTGAAGG.1	1.67086	1.283	1.62258	Epithelial cells_8	Epithelial cells
P1_ACGCCAGTCACTTCAT.1	1.65209	1.1351	1.5717	Epithelial cells_0	Epithelial cells
P1_ACGCCAGTCAGTGTTG.1	1.61024	1.22611	1.55997	Epithelial cells_1	Epithelial cells
P1_ACGCCAGTCCAAACTG.1	1.71948	1.18715	1.66001	Endothelial cells_6	Endothelial cells
P1_ACGCCAGTCCCACTTG.1	1.53249	1.14493	1.55553	Epithelial cells_12	Epithelial cells
P1_ACGCCGAAGAGTACCG.1	1.60805	1.26929	1.60298	Epithelial cells_1	Epithelial cells
P1_ACGCCGACAAATCCGT.1	1.74891	1.12326	1.66783	Macrophages_14	Macrophages
P1_ACGCCGACACATAACC.1	1.64119	1.14414	1.59158	Epithelial cells_1	Epithelial cells
P1_ACGCCGACAGGCGATA.1	1.63369	1.32707	1.66759	Epithelial cells_8	Epithelial cells
P1_ACGCCGACAGGTTTCA.1	1.6557	1.33168	1.64655	Epithelial cells_18	Epithelial cells
P1_ACGCCGACATACCATG.1	1.61935	1.27398	1.6175	Epithelial cells_1	Epithelial cells
P1_ACGCCGACATGTAGTC.1	1.68218	1.15607	1.57714	CD8+ T-cells_2	CD8+ T-cells
P1_ACGCCGAGTCGGCATC.1	1.65461	1.12597	1.60724	Epithelial cells_18	Epithelial cells
P1_ACGCCGAGTCTTGATG.1	1.60081	1.24482	1.6272	Epithelial cells_10	Epithelial cells
P1_ACGCCGAGTTGATTGC.1	1.66264	1.28416	1.55804	Epithelial cells_12	Epithelial cells
P1_ACGCCGATCATGGTCA.1	1.64582	1.19765	1.62198	Endothelial cells_6	Endothelial cells
P1_ACGCCGATCGTTGCCT.1	1.65173	1.27806	1.58225	Epithelial cells_0	Epithelial cells
P1_ACGCCGATCTGGCGAC.1	1.64788	1.16311	1.59212	Epithelial cells_0	Epithelial cells
P1_ACGGAGAAGCGATATA.1	1.64889	1.15513	1.60447	Epithelial cells_11	Epithelial cells
P1_ACGGAGAAGCTATGCT.1	1.63113	1.29037	1.61547	Epithelial cells_7	Epithelial cells
P1_ACGGAGAAGTGATCGG.1	1.66282	1.37206	1.64277	Epithelial cells_7	Epithelial cells
P1_ACGGAGACACAACTGT.1	1.76369	1.34628	1.64367	Epithelial cells_0	Epithelial cells
P1_ACGGAGACAGTTCATG.1	1.61584	1.14075	1.54686	Epithelial cells_11	Epithelial cells
P1_ACGGAGACATGACATC.1	1.73894	1.26077	1.64892	Epithelial cells_8	Epithelial cells
P1_ACGGAGAGTCAGAAGC.1	1.7096	1.29309	1.66015	Epithelial cells_1	Epithelial cells
P1_ACGGAGAGTCCGTGAC.1	1.63581	1.27953	1.62485	Epithelial cells_8	Epithelial cells
P1_ACGGAGATCACATAGC.1	1.61053	1.11375	1.54584	Epithelial cells_12	Epithelial cells
P1_ACGGAGATCATTATCC.1	1.54588	1.22769	1.57432	Macrophages_26	Macrophages
P1_ACGGAGATCCATTCTA.1	1.57777	1.18585	1.57099	CD8+ T-cells_2	CD8+ T-cells
P1_ACGGAGATCGGAATCT.1	1.67493	1.18908	1.60431	Epithelial cells_27	Epithelial cells
P1_ACGGCCAAGGCTCTTA.1	1.74696	1.21335	1.61639	Mast_9	Mast
P1_ACGGCCACAACAACCT.1	1.58955	1.08054	1.60199	Epithelial cells_12	Epithelial cells
P1_ACGGCCACACAACGCC.1	1.57818	1.16016	1.60649	Fibroblasts_3	Fibroblasts
P1_ACGGCCACATGCCTTC.1	1.66882	1.24319	1.61878	Epithelial cells_11	Epithelial cells
P1_ACGGCCAGTACCGAGA.1	1.6199	1.09723	1.54839	CD8+ T-cells_2	CD8+ T-cells
P1_ACGGCCAGTTAAAGAC.1	1.69133	1.14101	1.66393	Epithelial cells_10	Epithelial cells
P1_ACGGCCATCGGGAGTA.1	1.59232	1.12402	1.57714	Epithelial cells_8	Epithelial cells
P1_ACGGGCTAGTACGATA.1	1.67079	1.22626	1.62262	Epithelial cells_11	Epithelial cells
P1_ACGGGCTTCCGCAAGC.1	1.61649	1.10713	1.55035	CD8+ T-cells_4	CD8+ T-cells
P1_ACGGGTCCACGACTCG.1	1.667	1.26104	1.61014	Epithelial cells_11	Epithelial cells
P1_ACGGGTCCACTCGACG.1	1.68084	1.15053	1.56127	Epithelial cells_11	Epithelial cells
P1_ACGGGTCGTATGAAAC.1	1.6182	1.16281	1.56297	Epithelial cells_0	Epithelial cells
P1_ACGGGTCGTCTAAACC.1	1.64179	1.2574	1.67929	Epithelial cells_8	Epithelial cells
P1_ACGGGTCTCGAGCCCA.1	1.67685	1.29429	1.62186	Epithelial cells_8	Epithelial cells
P1_ACGTCAAAGTGAAGTT.1	1.55138	1.15094	1.55352	CD8+ T-cells_2	CD8+ T-cells
P1_ACGTCAACACACATGT.1	1.68094	1.27497	1.60531	Epithelial cells_11	Epithelial cells
P1_ACGTCAACACCGCTAG.1	1.55371	1.2666	1.59196	Epithelial cells_11	Epithelial cells
P1_ACGTCAATCCAGATCA.1	1.57906	1.18301	1.55061	Epithelial cells_18	Epithelial cells
P1_ACGTCAATCCTCTAGC.1	1.67457	1.1969	1.60782	Epithelial cells_1	Epithelial cells
P1_ACGTCAATCTATGTGG.1	1.71225	1.30166	1.65359	Epithelial cells_10	Epithelial cells
P1_ACTATCTAGTATCGAA.1	1.65096	1.12678	1.56377	Epithelial cells_11	Epithelial cells
P1_ACTATCTAGTTACGGG.1	1.72587	1.18567	1.65942	Epithelial cells_8	Epithelial cells
P1_ACTATCTCAATGACCT.1	1.66866	1.19303	1.61717	Epithelial cells_1	Epithelial cells
P1_ACTATCTCAGGATCGA.1	1.6529	1.2954	1.60638	Monocytes_15	Monocytes
P1_ACTATCTGTCCGAGTC.1	1.74943	1.25113	1.61654	Monocytes_15	Monocytes
P1_ACTATCTGTCGGCACT.1	1.64362	1.34931	1.65341	Epithelial cells_10	Epithelial cells
P1_ACTATCTGTTCCATGA.1	1.62156	1.23533	1.5558	Epithelial cells_12	Epithelial cells
P1_ACTATCTTCAATCTCT.1	1.59991	1.19819	1.66366	Myofibroblasts_5	Myofibroblasts
P1_ACTATCTTCCGCTGTT.1	1.79834	1.19428	1.67204	Epithelial cells_10	Epithelial cells
P1_ACTATCTTCGCCAAAT.1	1.67716	1.31373	1.66813	Macrophages_26	Macrophages
P1_ACTATCTTCGTTGCCT.1	1.50944	1.1392	1.5543	B-cells_21	B-cells
P1_ACTGAACAGGTGCTTT.1	1.65182	1.20634	1.60925	Epithelial cells_0	Epithelial cells
P1_ACTGAACAGTACATGA.1	1.57842	1.13422	1.56928	Epithelial cells_12	Epithelial cells
P1_ACTGAACGTGTGAAAT.1	1.61063	1.14092	1.5702	Epithelial cells_0	Epithelial cells
P1_ACTGAACTCCCATTTA.1	1.65368	1.17404	1.61445	Epithelial cells_0	Epithelial cells
P1_ACTGAACTCCTTCAAT.1	1.55822	1.32785	1.63868	Epithelial cells_8	Epithelial cells
P1_ACTGAACTCTACCAGA.1	1.61153	1.10724	1.54494	Epithelial cells_1	Epithelial cells
P1_ACTGAACTCTGCAGTA.1	1.66822	1.22844	1.63153	CD8+ T-cells_2	CD8+ T-cells
P1_ACTGAGTAGTAATCCC.1	1.62252	1.13072	1.56647	CD8+ T-cells_2	CD8+ T-cells
P1_ACTGAGTCACTGTCGG.1	1.63015	1.23537	1.59497	Epithelial cells_11	Epithelial cells
P1_ACTGAGTGTCCGAACC.1	1.6209	1.15525	1.60443	Epithelial cells_8	Epithelial cells
P1_ACTGAGTGTGGTAACG.1	1.73175	1.11611	1.59668	Epithelial cells_7	Epithelial cells
P1_ACTGAGTGTTTACTCT.1	1.59267	1.13883	1.55622	Epithelial cells_0	Epithelial cells
P1_ACTGAGTTCAACGGCC.1	1.70511	1.33455	1.62879	Epithelial cells_10	Epithelial cells
P1_ACTGAGTTCACTTCAT.1	1.6379	1.16559	1.63066	Epithelial cells_0	Epithelial cells
P1_ACTGAGTTCTGCTGCT.1	1.59156	1.15343	1.56186	Epithelial cells_11	Epithelial cells
P1_ACTGATGAGAGAACAG.1	1.56908	1.22829	1.56397	B-cells_20	B-cells
P1_ACTGATGCAAGTTAAG.1	1.57869	1.21055	1.60533	Epithelial cells_10	Epithelial cells
P1_ACTGATGCACATCTTT.1	1.52522	1.20023	1.56217	CD8+ T-cells_2	CD8+ T-cells
P1_ACTGATGTCCGAACGC.1	1.61949	1.15267	1.58346	Epithelial cells_11	Epithelial cells
P1_ACTGCTCAGATCTGAA.1	1.71334	1.23129	1.64138	Endothelial cells_6	Endothelial cells
P1_ACTGCTCAGCAACGGT.1	1.64498	1.3326	1.63385	Epithelial cells_8	Epithelial cells
P1_ACTGCTCAGGGTCGAT.1	1.62715	1.13095	1.60825	Epithelial cells_12	Epithelial cells
P1_ACTGCTCCAAGCCGTC.1	1.51592	1.28744	1.56802	Epithelial cells_7	Epithelial cells
P1_ACTGCTCGTACATCCA.1	1.60763	1.40738	1.60233	Epithelial cells_1	Epithelial cells
P1_ACTGCTCGTAGCGCTC.1	1.734	1.2125	1.62617	B-cells_21	B-cells
P1_ACTGCTCGTCTAGCGC.1	1.719	1.18169	1.63803	Epithelial cells_7	Epithelial cells
P1_ACTGCTCTCGGCGCTA.1	1.73478	1.28392	1.63089	Epithelial cells_18	Epithelial cells
P1_ACTGCTCTCGTAGGTT.1	1.55563	1.26935	1.60631	CD8+ T-cells_4	CD8+ T-cells
P1_ACTGTCCCAAACCTAC.1	1.56131	1.08089	1.53067	Epithelial cells_11	Epithelial cells
P1_ACTGTCCCATGGTAGG.1	1.55695	1.18995	1.55737	Epithelial cells_1	Epithelial cells
P1_ACTGTCCTCGAGGTAG.1	1.62041	1.11816	1.58371	CD8+ T-cells_2	CD8+ T-cells
P1_ACTGTCCTCGGCATCG.1	1.64703	1.17937	1.59823	CD8+ T-cells_2	CD8+ T-cells
P1_ACTGTCCTCGGTTCGG.1	1.73653	1.2276	1.59692	Epithelial cells_11	Epithelial cells
P1_ACTTACTAGCTAAACA.1	1.63283	1.16844	1.58539	Epithelial cells_11	Epithelial cells
P1_ACTTACTAGGACACCA.1	1.5375	1.12847	1.58963	Epithelial cells_0	Epithelial cells
P1_ACTTACTAGTGGTCCC.1	1.55599	1.08119	1.57905	Epithelial cells_12	Epithelial cells
P1_ACTTACTTCAACACAC.1	1.66506	1.27106	1.62931	Epithelial cells_0	Epithelial cells
P1_ACTTACTTCGCTTAGA.1	1.59918	1.22424	1.60531	Epithelial cells_0	Epithelial cells
P1_ACTTGTTAGAAGGTTT.1	1.62241	1.29608	1.57961	Epithelial cells_10	Epithelial cells
P1_ACTTGTTAGAGTACCG.1	1.64004	1.12433	1.54021	Epithelial cells_11	Epithelial cells
P1_ACTTGTTAGATACACA.1	1.66347	1.15804	1.56077	CD8+ T-cells_2	CD8+ T-cells
P1_ACTTGTTAGCGTCAAG.1	1.71974	1.32418	1.68352	Epithelial cells_11	Epithelial cells
P1_ACTTGTTAGGCGTACA.1	1.61627	1.23023	1.58774	Epithelial cells_0	Epithelial cells
P1_ACTTGTTAGTACGTAA.1	1.68857	1.09314	1.59384	Epithelial cells_0	Epithelial cells
P1_ACTTGTTCACACAGAG.1	1.71545	1.12186	1.5899	Epithelial cells_10	Epithelial cells
P1_ACTTGTTCACTAGTAC.1	1.52305	1.13211	1.60081	Epithelial cells_1	Epithelial cells
P1_ACTTGTTCAGTCTTCC.1	1.68788	1.1706	1.59109	Epithelial cells_1	Epithelial cells
P1_ACTTGTTGTAAATGAC.1	1.62831	1.14452	1.59834	Epithelial cells_12	Epithelial cells
P1_ACTTGTTGTATGCTTG.1	1.707	1.46152	1.70789	Epithelial cells_8	Epithelial cells
P1_ACTTGTTGTCACTGGC.1	1.61211	1.15083	1.61668	Epithelial cells_0	Epithelial cells
P1_ACTTGTTGTCTAACGT.1	1.6586	1.14544	1.56021	Epithelial cells_10	Epithelial cells
P1_ACTTGTTGTTCGTCTC.1	1.63141	1.27639	1.65609	Epithelial cells_8	Epithelial cells
P1_ACTTGTTTCACTCCTG.1	1.65965	1.24454	1.66728	Epithelial cells_12	Epithelial cells
P1_ACTTGTTTCCGAGCCA.1	1.80611	1.29462	1.68122	Epithelial cells_12	Epithelial cells
P1_ACTTGTTTCTTGTTTG.1	1.72377	1.17684	1.61487	Epithelial cells_0	Epithelial cells
P1_ACTTTCACACAACGCC.1	1.60508	1.13578	1.60225	Epithelial cells_0	Epithelial cells
P1_ACTTTCAGTAACGTTC.1	1.60081	1.32285	1.61574	Epithelial cells_8	Epithelial cells
P1_ACTTTCAGTCCCTTGT.1	1.58494	1.20719	1.55207	Epithelial cells_11	Epithelial cells
P1_ACTTTCATCAGAGCTT.1	1.58788	1.33557	1.54268	Epithelial cells_7	Epithelial cells
P1_ACTTTCATCCTTGCCA.1	1.61168	1.35569	1.6451	Fibroblasts_3	Fibroblasts
P1_ACTTTCATCGTGTAGT.1	1.6562	1.16303	1.56979	CD8+ T-cells_2	CD8+ T-cells
P1_AGAATAGAGAGGGCTT.1	1.86103	1.20242	1.67927	Epithelial cells_7	Epithelial cells
P1_AGAATAGAGAGGTTAT.1	1.63805	1.25179	1.65327	Monocytes_15	Monocytes
P1_AGAATAGCATATACGC.1	1.7645	1.13283	1.60375	Epithelial cells_11	Epithelial cells
P1_AGAATAGGTGGTTTCA.1	1.6509	1.35911	1.6323	Fibroblasts_3	Fibroblasts
P1_AGAATAGTCAGAGACG.1	1.52629	1.24364	1.60494	Epithelial cells_7	Epithelial cells
P1_AGACGTTAGCTACCTA.1	1.65996	1.24619	1.64098	Myofibroblasts_5	Myofibroblasts
P1_AGACGTTAGGTAAACT.1	1.65197	1.23526	1.6032	Epithelial cells_0	Epithelial cells
P1_AGACGTTAGTCAATAG.1	1.7845	1.21391	1.65943	Epithelial cells_11	Epithelial cells
P1_AGACGTTGTGAGGGAG.1	1.70344	1.21331	1.62346	CD8+ T-cells_2	CD8+ T-cells
P1_AGACGTTGTTGTACAC.1	1.59868	1.22469	1.56891	Epithelial cells_0	Epithelial cells
P1_AGACGTTGTTTCCACC.1	1.75055	1.16718	1.6443	Epithelial cells_7	Epithelial cells
P1_AGACGTTTCACGCGGT.1	1.62603	1.24085	1.5694	Monocytes_15	Monocytes
P1_AGACGTTTCATCGATG.1	1.66538	1.12731	1.53648	Epithelial cells_13	Epithelial cells
P1_AGACGTTTCGGTTAAC.1	1.69847	1.11676	1.56729	Epithelial cells_11	Epithelial cells
P1_AGAGCGAAGCGCCTTG.1	1.73483	1.42032	1.65373	Epithelial cells_7	Epithelial cells
P1_AGAGCGACAATGAAAC.1	1.62333	1.22676	1.55203	B-cells_21	B-cells
P1_AGAGCGACATCTGGTA.1	1.65019	1.16153	1.55941	Epithelial cells_11	Epithelial cells
P1_AGAGCGACATTTGCCC.1	1.65567	1.2127	1.57476	CD8+ T-cells_2	CD8+ T-cells
P1_AGAGCGAGTACTCTCC.1	1.65649	1.12922	1.53935	Epithelial cells_0	Epithelial cells
P1_AGAGCGAGTAGGCATG.1	1.601	1.2098	1.57923	CD8+ T-cells_2	CD8+ T-cells
P1_AGAGCGAGTGGAAAGA.1	1.59058	1.20464	1.59213	Epithelial cells_1	Epithelial cells
P1_AGAGCTTAGTGCCATT.1	1.56527	1.13111	1.56104	CD8+ T-cells_2	CD8+ T-cells
P1_AGAGCTTAGTGTACGG.1	1.62212	1.15653	1.5712	Epithelial cells_11	Epithelial cells
P1_AGAGCTTCATTATCTC.1	1.66342	1.27184	1.62748	Fibroblasts_3	Fibroblasts
P1_AGAGCTTGTCGGCTCA.1	1.61466	1.15228	1.59668	Endothelial cells_6	Endothelial cells
P1_AGAGCTTGTGCGAAAC.1	1.66537	1.21791	1.55553	CD8+ T-cells_2	CD8+ T-cells
P1_AGAGCTTTCTGCTGTC.1	1.74703	1.23226	1.55991	Epithelial cells_10	Epithelial cells
P1_AGAGTGGAGCGGATCA.1	1.67392	1.27896	1.62011	Epithelial cells_12	Epithelial cells
P1_AGAGTGGCACGGACAA.1	1.58752	1.20966	1.54444	CD8+ T-cells_2	CD8+ T-cells
P1_AGAGTGGCATCACCCT.1	1.58491	1.23226	1.63357	Macrophages_14	Macrophages
P1_AGAGTGGGTCATACTG.1	1.58309	1.18352	1.57683	Epithelial cells_12	Epithelial cells
P1_AGAGTGGGTCTTCGTC.1	1.52207	1.06771	1.54709	Epithelial cells_10	Epithelial cells
P1_AGAGTGGTCAACGAAA.1	1.61959	1.16004	1.63994	Epithelial cells_10	Epithelial cells
P1_AGAGTGGTCTGAGTGT.1	1.59878	1.13556	1.55907	CD8+ T-cells_2	CD8+ T-cells
P1_AGAGTGGTCTTGTATC.1	1.67167	1.2337	1.63883	B-cells_20	B-cells
P1_AGATCTGAGTAGGCCA.1	1.66675	1.24583	1.58525	CD8+ T-cells_2	CD8+ T-cells
P1_AGATCTGCAGTCAGCC.1	1.57641	1.07596	1.53322	Epithelial cells_12	Epithelial cells
P1_AGATCTGCATAGAAAC.1	1.64949	1.10488	1.59756	Epithelial cells_12	Epithelial cells
P1_AGATCTGGTACAGCAG.1	1.68368	1.36089	1.61016	Epithelial cells_8	Epithelial cells
P1_AGATCTGGTCGGGTCT.1	1.49782	1.05632	1.548	B-cells_21	B-cells
P1_AGATCTGGTCTCTTTA.1	1.62581	1.17812	1.65664	Endothelial cells_6	Endothelial cells
P1_AGATCTGGTGCACCAC.1	1.69454	1.0509	1.58069	CD8+ T-cells_2	CD8+ T-cells
P1_AGATCTGGTGGTTTCA.1	1.79749	1.18064	1.66161	Epithelial cells_7	Epithelial cells
P1_AGATCTGGTTTCGCTC.1	1.60398	1.13975	1.54378	Epithelial cells_11	Epithelial cells
P1_AGATCTGTCCTGCTTG.1	1.70083	1.14703	1.57363	CD8+ T-cells_2	CD8+ T-cells
P1_AGATCTGTCGGGAGTA.1	1.69363	1.25359	1.6372	Monocytes_15	Monocytes
P1_AGATCTGTCTTTCCTC.1	1.59631	1.25912	1.67038	Epithelial cells_8	Epithelial cells
P1_AGATTGCAGAGCTATA.1	1.50644	1.07015	1.54896	B-cells_21	B-cells
P1_AGATTGCAGCTAACTC.1	1.78468	1.14837	1.70928	Epithelial cells_10	Epithelial cells
P1_AGATTGCAGTTGCAGG.1	1.54666	1.24354	1.55987	Epithelial cells_11	Epithelial cells
P1_AGATTGCCACAGACAG.1	1.78919	1.20623	1.60675	Epithelial cells_13	Epithelial cells
P1_AGATTGCCATCATCCC.1	1.58241	1.23558	1.64429	Endothelial cells_6	Endothelial cells
P1_AGATTGCCATCCGCGA.1	1.70687	1.24505	1.63346	CD8+ T-cells_2	CD8+ T-cells
P1_AGATTGCGTAGCTGCC.1	1.59697	1.23605	1.57775	CD8+ T-cells_2	CD8+ T-cells
P1_AGATTGCGTCCGAACC.1	1.69945	1.22663	1.61008	Epithelial cells_11	Epithelial cells
P1_AGATTGCTCAATCACG.1	1.54227	1.06085	1.53325	Epithelial cells_11	Epithelial cells
P1_AGATTGCTCAGCTCGG.1	1.67691	1.21493	1.59011	Epithelial cells_12	Epithelial cells
P1_AGATTGCTCCCGACTT.1	1.69916	1.14009	1.58808	Fibroblasts_19	Fibroblasts
P1_AGATTGCTCCTTCAAT.1	1.70355	1.21417	1.61497	Epithelial cells_1	Epithelial cells
P1_AGATTGCTCTCGCTTG.1	1.66294	1.29299	1.6327	Epithelial cells_7	Epithelial cells
P1_AGATTGCTCTGATTCT.1	1.71088	1.24317	1.68955	Fibroblasts_3	Fibroblasts
P1_AGCAGCCAGGAGCGTT.1	1.65253	1.24201	1.59029	Epithelial cells_1	Epithelial cells
P1_AGCAGCCAGTTAGCGG.1	1.6998	1.30623	1.64906	Myofibroblasts_5	Myofibroblasts
P1_AGCAGCCCAAACTGTC.1	1.58788	1.17254	1.60613	Epithelial cells_18	Epithelial cells
P1_AGCAGCCCAACGCACC.1	1.62637	1.21634	1.61603	Epithelial cells_10	Epithelial cells
P1_AGCAGCCCAGATGGCA.1	1.59799	1.13846	1.57706	Epithelial cells_7	Epithelial cells
P1_AGCAGCCCAGGTCCAC.1	1.63942	1.2489	1.60686	CD8+ T-cells_4	CD8+ T-cells
P1_AGCAGCCGTAAGCACG.1	1.66983	1.19072	1.60564	Monocytes_15	Monocytes
P1_AGCAGCCGTTGCGTTA.1	1.69741	1.17155	1.59279	Epithelial cells_13	Epithelial cells
P1_AGCAGCCTCAGTCAGT.1	1.65012	1.17228	1.64272	Epithelial cells_10	Epithelial cells
P1_AGCAGCCTCATACGGT.1	1.6451	1.14335	1.61555	Fibroblasts_19	Fibroblasts
P1_AGCAGCCTCCACTGGG.1	1.73261	1.28848	1.70149	Epithelial cells_8	Epithelial cells
P1_AGCAGCCTCCAGGGCT.1	1.60974	1.21644	1.58797	Epithelial cells_8	Epithelial cells
P1_AGCAGCCTCGTAGGTT.1	1.51857	1.21362	1.63995	Epithelial cells_8	Epithelial cells
P1_AGCATACAGACCGGAT.1	1.66152	1.18459	1.58558	Epithelial cells_12	Epithelial cells
P1_AGCATACAGGAGCGAG.1	1.57686	1.17283	1.6207	Endothelial cells_6	Endothelial cells
P1_AGCATACAGGCATTGG.1	1.63772	1.37501	1.59481	Epithelial cells_12	Epithelial cells
P1_AGCATACAGTTAGCGG.1	1.61292	1.30289	1.58	Epithelial cells_8	Epithelial cells
P1_AGCATACCAGTATCTG.1	1.65036	1.20888	1.63627	Monocytes_15	Monocytes
P1_AGCATACCATCAGTCA.1	1.6661	1.25961	1.62417	Epithelial cells_8	Epithelial cells
P1_AGCATACGTAAGTGTA.1	1.77349	1.29299	1.69229	Epithelial cells_8	Epithelial cells
P1_AGCATACGTGGTCCGT.1	1.49911	1.18579	1.56206	Endothelial cells_6	Endothelial cells
P1_AGCATACGTTGACGTT.1	1.6278	1.09183	1.60273	Epithelial cells_11	Epithelial cells
P1_AGCATACGTTGATTGC.1	1.59968	1.1611	1.58871	Epithelial cells_1	Epithelial cells
P1_AGCATACTCAATCACG.1	1.76033	1.23326	1.62524	Epithelial cells_7	Epithelial cells
P1_AGCCTAAAGCTACCTA.1	1.61782	1.25664	1.59299	Epithelial cells_0	Epithelial cells
P1_AGCCTAAAGGGCATGT.1	1.69098	1.25908	1.59463	Epithelial cells_1	Epithelial cells
P1_AGCCTAAAGTCCAGGA.1	1.61504	1.21493	1.54357	CD8+ T-cells_2	CD8+ T-cells
P1_AGCCTAAAGTGGTAAT.1	1.69595	1.15469	1.62586	Epithelial cells_0	Epithelial cells
P1_AGCCTAACAATAGAGT.1	1.58014	1.07573	1.54659	Epithelial cells_12	Epithelial cells
P1_AGCCTAACACATCCGG.1	1.70944	1.16262	1.58842	CD8+ T-cells_4	CD8+ T-cells
P1_AGCCTAACACCACGTG.1	1.58314	1.10959	1.55373	CD8+ T-cells_2	CD8+ T-cells
P1_AGCCTAACATCAGTAC.1	1.6173	1.16858	1.59342	Macrophages_26	Macrophages
P1_AGCCTAACATGTTCCC.1	1.70431	1.23675	1.61234	Epithelial cells_13	Epithelial cells
P1_AGCCTAAGTGGGTCAA.1	1.61524	1.19384	1.59953	Myofibroblasts_5	Myofibroblasts
P1_AGCCTAATCACGCGGT.1	1.62101	1.20173	1.57787	Epithelial cells_1	Epithelial cells
P1_AGCCTAATCATCATTC.1	1.54977	1.17056	1.62452	Epithelial cells_8	Epithelial cells
P1_AGCCTAATCGAGAGCA.1	1.59718	1.20013	1.64794	Macrophages_26	Macrophages
P1_AGCCTAATCTTCCTTC.1	1.66881	1.1813	1.58617	Epithelial cells_0	Epithelial cells
P1_AGCGGTCAGATCCCAT.1	1.69346	1.29958	1.62202	Epithelial cells_11	Epithelial cells
P1_AGCGGTCAGCTGATAA.1	1.66746	1.15707	1.59514	B-cells_21	B-cells
P1_AGCGGTCAGGAGTACC.1	1.67572	1.30686	1.61761	Epithelial cells_7	Epithelial cells
P1_AGCGGTCAGGCTCAGA.1	1.75677	1.32609	1.67447	Epithelial cells_8	Epithelial cells
P1_AGCGGTCAGGGAGTAA.1	1.72031	1.28494	1.61148	Epithelial cells_12	Epithelial cells
P1_AGCGGTCAGTGAAGAG.1	1.67972	1.2116	1.60512	CD8+ T-cells_2	CD8+ T-cells
P1_AGCGGTCCAAAGCAAT.1	1.63576	1.23441	1.63504	Mast_9	Mast
P1_AGCGGTCTCACATACG.1	1.60535	1.17286	1.57451	Epithelial cells_18	Epithelial cells
P1_AGCGGTCTCACCCTCA.1	1.67301	1.17519	1.57831	Epithelial cells_18	Epithelial cells
P1_AGCGTATAGCCCAGCT.1	1.69692	1.24298	1.66694	Monocytes_15	Monocytes
P1_AGCGTATCACTTCTGC.1	1.71323	1.27898	1.62424	Epithelial cells_12	Epithelial cells
P1_AGCGTATGTGACGGTA.1	1.66874	1.35985	1.65728	Macrophages_26	Macrophages
P1_AGCGTATTCAGCGATT.1	1.70469	1.18808	1.59113	Epithelial cells_12	Epithelial cells
P1_AGCGTCGAGACTAAGT.1	1.5878	1.17868	1.59474	CD8+ T-cells_2	CD8+ T-cells
P1_AGCGTCGGTACCGTAT.1	1.6177	1.21486	1.61571	Epithelial cells_12	Epithelial cells
P1_AGCGTCGTCGGTGTCG.1	1.64046	1.34438	1.6224	Epithelial cells_12	Epithelial cells
P1_AGCTCCTAGACCACGA.1	1.50274	1.09615	1.5742	Epithelial cells_0	Epithelial cells
P1_AGCTCCTAGAGACGAA.1	1.68158	1.19785	1.61686	Epithelial cells_10	Epithelial cells
P1_AGCTCCTAGGCTCTTA.1	1.62855	1.19531	1.60732	Epithelial cells_11	Epithelial cells
P1_AGCTCCTAGTACGACG.1	1.60486	1.26911	1.59143	CD8+ T-cells_4	CD8+ T-cells
P1_AGCTCCTCAACTGGCC.1	1.67391	1.22217	1.68778	Myofibroblasts_5	Myofibroblasts
P1_AGCTCCTTCACCTTAT.1	1.60939	1.11675	1.60622	CD8+ T-cells_2	CD8+ T-cells
P1_AGCTCCTTCTGAAAGA.1	1.6106	1.13086	1.57247	Epithelial cells_12	Epithelial cells
P1_AGCTCCTTCTGATTCT.1	1.71895	1.24002	1.65284	Endothelial cells_6	Endothelial cells
P1_AGCTCTCAGCAATATG.1	1.7992	1.11498	1.61286	Epithelial cells_11	Epithelial cells
P1_AGCTCTCCAAGGTGTG.1	1.66145	1.41017	1.65669	Fibroblasts_3	Fibroblasts
P1_AGCTCTCCACGGTGTC.1	1.64892	1.18969	1.63501	Epithelial cells_11	Epithelial cells
P1_AGCTCTCCATGGTTGT.1	1.67556	1.26631	1.62971	Macrophages_14	Macrophages
P1_AGCTCTCGTGGTAACG.1	1.60077	1.13738	1.56863	Epithelial cells_11	Epithelial cells
P1_AGCTCTCTCCAAATGC.1	1.6355	1.21575	1.57439	Epithelial cells_13	Epithelial cells
P1_AGCTCTCTCCCACTTG.1	1.70023	1.08302	1.61302	Epithelial cells_12	Epithelial cells
P1_AGCTCTCTCGTGGACC.1	1.58108	1.20206	1.58772	CD8+ T-cells_4	CD8+ T-cells
P1_AGCTCTCTCTTGTACT.1	1.67954	1.15367	1.572	Epithelial cells_12	Epithelial cells
P1_AGCTTGAAGCGTTCCG.1	1.60224	1.16962	1.53671	Epithelial cells_11	Epithelial cells
P1_AGCTTGAAGTGCGTGA.1	1.60743	1.1213	1.55998	Epithelial cells_11	Epithelial cells
P1_AGCTTGAGTCCCGACA.1	1.70178	1.19052	1.6002	CD8+ T-cells_2	CD8+ T-cells
P1_AGCTTGAGTGAGGCTA.1	1.57136	1.2753	1.53544	Epithelial cells_12	Epithelial cells
P1_AGCTTGAGTTCCGGCA.1	1.63182	1.30645	1.63744	Epithelial cells_8	Epithelial cells
P1_AGCTTGAGTTCTGTTT.1	1.57869	1.3297	1.6264	Fibroblasts_3	Fibroblasts
P1_AGCTTGATCCTCAATT.1	1.67338	1.18557	1.64382	Myofibroblasts_5	Myofibroblasts
P1_AGCTTGATCTTTCCTC.1	1.71763	1.22454	1.61318	Epithelial cells_7	Epithelial cells
P1_AGGCCACCAAGTTGTC.1	1.64801	1.2253	1.59346	Fibroblasts_19	Fibroblasts
P1_AGGCCACCATGTAAGA.1	1.61889	1.18333	1.58091	CD8+ T-cells_2	CD8+ T-cells
P1_AGGCCACGTCCCTTGT.1	1.8239	1.26099	1.65847	Epithelial cells_7	Epithelial cells
P1_AGGCCACGTCCGAATT.1	1.73199	1.24047	1.62169	Epithelial cells_0	Epithelial cells
P1_AGGCCACGTCGTGGCT.1	1.50236	1.13857	1.51984	Epithelial cells_1	Epithelial cells
P1_AGGCCACGTTCGCTAA.1	1.62391	1.25712	1.58603	CD8+ T-cells_2	CD8+ T-cells
P1_AGGCCACTCGTCGTTC.1	1.70524	1.24252	1.6125	Epithelial cells_11	Epithelial cells
P1_AGGCCACTCGTGGACC.1	1.65877	1.23677	1.67293	Epithelial cells_8	Epithelial cells
P1_AGGCCGTAGAGTAATC.1	1.64669	1.25079	1.60247	Epithelial cells_12	Epithelial cells
P1_AGGCCGTAGCCTTGAT.1	1.63625	1.2069	1.5899	Epithelial cells_12	Epithelial cells
P1_AGGCCGTAGGTGCTAG.1	1.61686	1.19634	1.60377	B-cells_20	B-cells
P1_AGGCCGTGTACCGCTG.1	1.63928	1.27755	1.57721	CD8+ T-cells_4	CD8+ T-cells
P1_AGGCCGTTCAGGCAAG.1	1.73266	1.39231	1.65623	Epithelial cells_12	Epithelial cells
P1_AGGCCGTTCGTTACGA.1	1.5479	1.10905	1.54773	Epithelial cells_7	Epithelial cells
P1_AGGGAGTAGATCACGG.1	1.64907	1.1338	1.61337	Epithelial cells_12	Epithelial cells
P1_AGGGAGTAGCGGATCA.1	1.63386	1.21153	1.57225	Epithelial cells_0	Epithelial cells
P1_AGGGAGTAGGCTAGGT.1	1.59965	1.30256	1.59088	Macrophages_26	Macrophages
P1_AGGGAGTAGTCCCACG.1	1.67759	1.2754	1.63076	Epithelial cells_12	Epithelial cells
P1_AGGGAGTCACGGCTAC.1	1.59226	1.19548	1.65442	Endothelial cells_6	Endothelial cells
P1_AGGGAGTGTAGAAAGG.1	1.62132	1.21302	1.59693	Epithelial cells_12	Epithelial cells
P1_AGGGAGTGTAGCGCTC.1	1.70557	1.28057	1.62673	Fibroblasts_19	Fibroblasts
P1_AGGGAGTGTGGAAAGA.1	1.69523	1.26402	1.63881	Macrophages_14	Macrophages
P1_AGGGAGTGTTACGTCA.1	1.61735	1.3082	1.5997	Epithelial cells_8	Epithelial cells
P1_AGGGAGTTCACGACTA.1	1.62316	1.20235	1.62749	Endothelial cells_6	Endothelial cells
P1_AGGGAGTTCAGTCCCT.1	1.53169	1.12982	1.55806	CD8+ T-cells_2	CD8+ T-cells
P1_AGGGAGTTCTGTTGAG.1	1.70083	1.22688	1.64564	Epithelial cells_8	Epithelial cells
P1_AGGGATGAGCCTCGTG.1	1.63146	1.19065	1.62876	Endothelial cells_6	Endothelial cells
P1_AGGGATGAGGTGACCA.1	1.65285	1.20427	1.606	Epithelial cells_8	Epithelial cells
P1_AGGGATGCAAAGGAAG.1	1.61105	1.22678	1.57499	CD8+ T-cells_2	CD8+ T-cells
P1_AGGGATGCACATCCGG.1	1.61526	1.32342	1.60634	Epithelial cells_18	Epithelial cells
P1_AGGGATGCAGGTCGTC.1	1.65287	1.32958	1.65857	Epithelial cells_27	Epithelial cells
P1_AGGGATGCATGCCCGA.1	1.60595	1.20402	1.58628	Epithelial cells_7	Epithelial cells
P1_AGGGATGGTAAGTAGT.1	1.6666	1.23195	1.66183	Monocytes_15	Monocytes
P1_AGGGATGGTGATGTGG.1	1.68721	1.25467	1.63591	Epithelial cells_0	Epithelial cells
P1_AGGGATGTCAACGGGA.1	1.66774	1.26512	1.60878	CD8+ T-cells_2	CD8+ T-cells
P1_AGGGTGAAGGAGCGAG.1	1.6619	1.12666	1.57613	B-cells_21	B-cells
P1_AGGGTGACATTGTGCA.1	1.68844	1.23672	1.61144	Epithelial cells_10	Epithelial cells
P1_AGGGTGAGTAGGGACT.1	1.67514	1.15402	1.61343	Epithelial cells_7	Epithelial cells
P1_AGGGTGAGTCGGCATC.1	1.51212	1.18172	1.57947	Epithelial cells_10	Epithelial cells
P1_AGGGTGATCAACTCTT.1	1.67599	1.2596	1.6003	Epithelial cells_11	Epithelial cells
P1_AGGGTGATCGGTCTAA.1	1.67214	1.27327	1.59239	Epithelial cells_7	Epithelial cells
P1_AGGTCATAGAATTCCC.1	1.61888	1.26881	1.5963	Epithelial cells_8	Epithelial cells
P1_AGGTCATAGAGGACGG.1	1.74855	1.28823	1.67197	Epithelial cells_12	Epithelial cells
P1_AGGTCATAGCGTTGCC.1	1.60444	1.10415	1.57378	CD8+ T-cells_4	CD8+ T-cells
P1_AGGTCATCAAGGCTCC.1	1.58168	1.14003	1.58441	CD8+ T-cells_2	CD8+ T-cells
P1_AGGTCATCAGCTTCGG.1	1.66059	1.26401	1.61942	Epithelial cells_8	Epithelial cells
P1_AGGTCATCAGGACCCT.1	1.63122	1.21954	1.55246	Epithelial cells_11	Epithelial cells
P1_AGGTCATGTGTGACCC.1	1.64002	1.1446	1.58784	B-cells_21	B-cells
P1_AGGTCATGTTGTCGCG.1	1.59669	1.18225	1.61628	Epithelial cells_1	Epithelial cells
P1_AGGTCATTCAATCACG.1	1.55569	1.11975	1.55613	CD8+ T-cells_2	CD8+ T-cells
P1_AGGTCATTCTGCAAGT.1	1.57622	1.23476	1.58964	CD8+ T-cells_4	CD8+ T-cells
P1_AGGTCCGAGCAGGTCA.1	1.56403	1.15363	1.57017	Epithelial cells_1	Epithelial cells
P1_AGGTCCGCACAGGTTT.1	1.54526	1.02153	1.53145	Epithelial cells_7	Epithelial cells
P1_AGGTCCGCACGTAAGG.1	1.58367	1.2572	1.60935	Epithelial cells_0	Epithelial cells
P1_AGGTCCGGTTTGGGCC.1	1.52526	1.10118	1.59236	Epithelial cells_10	Epithelial cells
P1_AGGTCCGTCAATACCG.1	1.64369	1.28874	1.65263	Epithelial cells_10	Epithelial cells
P1_AGGTCCGTCCTGCAGG.1	1.64344	1.18371	1.57641	Epithelial cells_18	Epithelial cells
P1_AGTAGTCAGTTTAGGA.1	1.64645	1.14031	1.58288	Epithelial cells_12	Epithelial cells
P1_AGTAGTCCAAACTGTC.1	1.61473	1.21853	1.58287	CD8+ T-cells_4	CD8+ T-cells
P1_AGTAGTCGTAAGTAGT.1	1.5694	1.15008	1.60073	Epithelial cells_0	Epithelial cells
P1_AGTAGTCTCAACTCTT.1	1.64864	1.15538	1.57042	Epithelial cells_1	Epithelial cells
P1_AGTAGTCTCGCCTGAG.1	1.52848	1.25588	1.58485	Endothelial cells_6	Endothelial cells
P1_AGTAGTCTCTGTCCGT.1	1.60618	1.25787	1.63849	Epithelial cells_13	Epithelial cells
P1_AGTCTTTAGACTGGGT.1	1.62441	1.26639	1.6199	Epithelial cells_10	Epithelial cells
P1_AGTCTTTCAATCCAAC.1	1.62749	1.29314	1.61414	Epithelial cells_12	Epithelial cells
P1_AGTCTTTGTCCCGACA.1	1.68838	1.2191	1.64848	Epithelial cells_8	Epithelial cells
P1_AGTCTTTGTGAAAGAG.1	1.64916	1.17685	1.62124	Epithelial cells_11	Epithelial cells
P1_AGTCTTTTCCTGTACC.1	1.6619	1.24564	1.62912	Epithelial cells_13	Epithelial cells
P1_AGTGAGGAGCGTCTAT.1	1.61448	1.17846	1.57942	Epithelial cells_12	Epithelial cells
P1_AGTGAGGAGCTGTCTA.1	1.52268	1.14784	1.59949	Endothelial cells_6	Endothelial cells
P1_AGTGAGGCACCTCGGA.1	1.61528	1.11749	1.5656	Epithelial cells_11	Epithelial cells
P1_AGTGAGGCAGTCAGAG.1	1.50006	1.17335	1.55659	Epithelial cells_7	Epithelial cells
P1_AGTGAGGGTTAAGGGC.1	1.70343	1.24784	1.71844	Fibroblasts_3	Fibroblasts
P1_AGTGAGGGTTATCCGA.1	1.51457	1.06818	1.57988	Epithelial cells_12	Epithelial cells
P1_AGTGAGGTCCGTAGTA.1	1.58842	1.26173	1.61672	CD8+ T-cells_4	CD8+ T-cells
P1_AGTGAGGTCCTTTCGG.1	1.64496	1.27016	1.65067	Epithelial cells_8	Epithelial cells
P1_AGTGAGGTCGCCAAAT.1	1.54434	1.15797	1.55485	Epithelial cells_12	Epithelial cells
P1_AGTGGGAAGGGAAACA.1	1.61891	1.29124	1.65837	Epithelial cells_10	Epithelial cells
P1_AGTGGGACAAAGTCAA.1	1.71419	1.13612	1.67921	Macrophages_26	Macrophages
P1_AGTGGGAGTAGCCTAT.1	1.6011	1.16945	1.60883	Epithelial cells_8	Epithelial cells
P1_AGTGGGAGTATAAACG.1	1.61723	1.12317	1.62113	Epithelial cells_12	Epithelial cells
P1_AGTGGGAGTCCTCCAT.1	1.61806	1.12575	1.57788	Epithelial cells_8	Epithelial cells
P1_AGTGGGAGTCTGCCAG.1	1.67049	1.27065	1.6038	Epithelial cells_12	Epithelial cells
P1_AGTGGGATCAAAGTAG.1	1.62446	1.17383	1.56158	CD8+ T-cells_2	CD8+ T-cells
P1_AGTGTCAAGAATGTTG.1	1.65924	1.23472	1.59599	Epithelial cells_0	Epithelial cells
P1_AGTGTCACAAGGACTG.1	1.66223	1.17801	1.5354	CD8+ T-cells_2	CD8+ T-cells
P1_AGTGTCACAATGAATG.1	1.60904	1.31233	1.61009	Epithelial cells_10	Epithelial cells
P1_AGTGTCACACACTGCG.1	1.72905	1.26898	1.6489	Epithelial cells_0	Epithelial cells
P1_AGTGTCACAGGACGTA.1	1.69659	1.37546	1.67555	Epithelial cells_8	Epithelial cells
P1_AGTGTCAGTAAGAGAG.1	1.64226	1.21834	1.58573	Epithelial cells_10	Epithelial cells
P1_AGTGTCAGTCGGCACT.1	1.57064	1.15211	1.5878	CD8+ T-cells_2	CD8+ T-cells
P1_AGTGTCAGTCTAGAGG.1	1.5867	1.3097	1.70756	Macrophages_26	Macrophages
P1_AGTGTCAGTTCAGACT.1	1.58243	1.14494	1.55302	Epithelial cells_13	Epithelial cells
P1_AGTGTCATCTACTATC.1	1.57183	1.27226	1.57651	Epithelial cells_12	Epithelial cells
P1_AGTTGGTAGGGTGTGT.1	1.58559	1.25762	1.61449	Monocytes_15	Monocytes
P1_AGTTGGTAGTAATCCC.1	1.59862	1.16208	1.57299	Epithelial cells_11	Epithelial cells
P1_AGTTGGTCAATACGCT.1	1.55439	1.13634	1.57561	CD8+ T-cells_2	CD8+ T-cells
P1_AGTTGGTGTCGAGATG.1	1.63851	1.27989	1.64695	Epithelial cells_8	Epithelial cells
P1_AGTTGGTGTTAGGGTG.1	1.69647	1.21119	1.5933	Epithelial cells_11	Epithelial cells
P1_AGTTGGTGTTCCATGA.1	1.64112	1.17476	1.58456	CD8+ T-cells_2	CD8+ T-cells
P1_ATAACGCAGGAATCGC.1	1.6282	1.24522	1.57169	CD8+ T-cells_2	CD8+ T-cells
P1_ATAACGCAGTCCATAC.1	1.54559	1.16688	1.6491	Epithelial cells_8	Epithelial cells
P1_ATAACGCAGTGCAAGC.1	1.73734	1.29759	1.63434	Epithelial cells_11	Epithelial cells
P1_ATAACGCAGTGGTAAT.1	1.65484	1.24404	1.62269	Macrophages_26	Macrophages
P1_ATAACGCCACGAAACG.1	1.75305	1.24442	1.63449	Epithelial cells_12	Epithelial cells
P1_ATAACGCCACTGCCAG.1	1.59806	1.18883	1.56357	Epithelial cells_10	Epithelial cells
P1_ATAACGCGTATTCGTG.1	1.65857	1.32591	1.65089	Macrophages_26	Macrophages
P1_ATAACGCGTCATATCG.1	1.55899	1.14179	1.57617	Epithelial cells_10	Epithelial cells
P1_ATAACGCTCGATAGAA.1	1.72225	1.25109	1.63049	Fibroblasts_19	Fibroblasts
P1_ATAACGCTCTGGGCCA.1	1.66351	1.22583	1.60982	Epithelial cells_8	Epithelial cells
P1_ATAAGAGAGCCAACAG.1	1.7975	1.27015	1.60622	Epithelial cells_12	Epithelial cells
P1_ATAAGAGAGGAATTAC.1	1.68015	1.26066	1.67331	Fibroblasts_3	Fibroblasts
P1_ATAAGAGCAACGATCT.1	1.60589	1.26272	1.6143	Epithelial cells_11	Epithelial cells
P1_ATAAGAGCATCGGGTC.1	1.70755	1.28829	1.64468	Epithelial cells_10	Epithelial cells
P1_ATAAGAGGTAAACACA.1	1.57614	1.30262	1.60583	Epithelial cells_8	Epithelial cells
P1_ATAAGAGTCCAGAGGA.1	1.65322	1.37002	1.6629	Epithelial cells_10	Epithelial cells
P1_ATAAGAGTCCATTCTA.1	1.57801	1.15745	1.56844	Epithelial cells_1	Epithelial cells
P1_ATAAGAGTCGCCAAAT.1	1.65093	1.14509	1.5296	Epithelial cells_12	Epithelial cells
P1_ATAAGAGTCGCCGTGA.1	1.66176	1.29326	1.56049	Epithelial cells_11	Epithelial cells
P1_ATAGACCAGATGTGTA.1	1.59338	1.18555	1.5897	Epithelial cells_1	Epithelial cells
P1_ATAGACCAGATTACCC.1	1.6403	1.15878	1.68619	Fibroblasts_3	Fibroblasts
P1_ATAGACCAGGAGTTGC.1	1.61323	1.1719	1.60023	CD8+ T-cells_2	CD8+ T-cells
P1_ATAGACCCAATGGATA.1	1.61535	1.18787	1.62817	Epithelial cells_10	Epithelial cells
P1_ATAGACCCACCCTATC.1	1.58682	1.23624	1.56132	Epithelial cells_11	Epithelial cells
P1_ATAGACCCAGACACTT.1	1.60423	1.15486	1.62723	Epithelial cells_0	Epithelial cells
P1_ATAGACCCAGTATGCT.1	1.60481	1.20113	1.58642	Epithelial cells_1	Epithelial cells
P1_ATAGACCCATGTAGTC.1	1.56026	1.14999	1.52683	CD8+ T-cells_2	CD8+ T-cells
P1_ATAGACCGTCCTGCTT.1	1.64612	1.10808	1.61401	CD8+ T-cells_2	CD8+ T-cells
P1_ATAGACCGTTAAGAAC.1	1.62203	1.14184	1.60583	Endothelial cells_6	Endothelial cells
P1_ATAGACCGTTCCGGCA.1	1.67381	1.25948	1.59211	Epithelial cells_12	Epithelial cells
P1_ATAGACCTCAGCTGGC.1	1.65535	1.15528	1.60458	Epithelial cells_1	Epithelial cells
P1_ATAGACCTCTGGCGTG.1	1.72467	1.23116	1.66717	Macrophages_14	Macrophages
P1_ATCACGAAGAAGAAGC.1	1.62164	1.24703	1.60845	Fibroblasts_19	Fibroblasts
P1_ATCACGAAGGTGATTA.1	1.63311	1.35947	1.66215	Epithelial cells_8	Epithelial cells
P1_ATCACGAAGTACGCCC.1	1.68388	1.10169	1.56703	Epithelial cells_1	Epithelial cells
P1_ATCACGACAAGCCGCT.1	1.67206	1.27961	1.61179	Epithelial cells_7	Epithelial cells
P1_ATCACGACAGCTCGAC.1	1.68792	1.21319	1.61889	B-cells_21	B-cells
P1_ATCACGACAGTGACAG.1	1.57151	1.08821	1.55261	Epithelial cells_11	Epithelial cells
P1_ATCACGAGTACATGTC.1	1.69452	1.18766	1.62455	B-cells_21	B-cells
P1_ATCACGAGTGACAAAT.1	1.56262	1.21418	1.55067	Epithelial cells_13	Epithelial cells
P1_ATCACGAGTGGTTTCA.1	1.84169	1.40773	1.73141	Myofibroblasts_5	Myofibroblasts
P1_ATCACGATCCTAGAAC.1	1.65018	1.26428	1.63221	Macrophages_26	Macrophages
P1_ATCATCTAGTTACGGG.1	1.58425	1.27713	1.59936	Epithelial cells_12	Epithelial cells
P1_ATCATCTCAGGTGGAT.1	1.74197	1.25048	1.63277	Epithelial cells_8	Epithelial cells
P1_ATCATCTCATAACCTG.1	1.58259	1.2607	1.59336	CD8+ T-cells_4	CD8+ T-cells
P1_ATCATCTTCCTAAGTG.1	1.67384	1.37796	1.67104	Epithelial cells_8	Epithelial cells
P1_ATCATCTTCGGTGTCG.1	1.54834	1.08459	1.54246	B-cells_21	B-cells
P1_ATCATGGAGTGGAGTC.1	1.79524	1.15904	1.6087	Epithelial cells_18	Epithelial cells
P1_ATCATGGAGTTGAGTA.1	1.56774	1.27041	1.64687	Fibroblasts_3	Fibroblasts
P1_ATCATGGCACACATGT.1	1.61115	1.1466	1.56393	CD8+ T-cells_4	CD8+ T-cells
P1_ATCATGGCACACCGCA.1	1.54666	1.28506	1.55932	Fibroblasts_19	Fibroblasts
P1_ATCATGGGTGCGGTAA.1	1.5991	1.19102	1.62585	CD8+ T-cells_2	CD8+ T-cells
P1_ATCATGGTCGTTTAGG.1	1.65723	1.17259	1.63244	Monocytes_15	Monocytes
P1_ATCCACCAGAGTAAGG.1	1.5929	1.19703	1.54902	Epithelial cells_12	Epithelial cells
P1_ATCCACCAGGGTGTGT.1	1.54945	1.17914	1.5816	Epithelial cells_11	Epithelial cells
P1_ATCCACCAGGGTTTCT.1	1.64436	1.20639	1.57252	Epithelial cells_11	Epithelial cells
P1_ATCCACCAGTGGGCTA.1	1.70563	1.19244	1.60914	Myofibroblasts_5	Myofibroblasts
P1_ATCCACCCAACACCTA.1	1.59873	1.17992	1.57316	Fibroblasts_19	Fibroblasts
P1_ATCCACCCACGAGGTA.1	1.65418	1.15657	1.59308	CD8+ T-cells_4	CD8+ T-cells
P1_ATCCACCGTTGAGTTC.1	1.69544	1.19853	1.60703	Epithelial cells_0	Epithelial cells
P1_ATCCACCTCAGCTGGC.1	1.65662	1.42059	1.64507	Fibroblasts_19	Fibroblasts
P1_ATCCACCTCCAATGGT.1	1.64651	1.2817	1.58129	CD8+ T-cells_2	CD8+ T-cells
P1_ATCCGAAAGATCCCGC.1	1.5696	1.12647	1.55031	CD8+ T-cells_2	CD8+ T-cells
P1_ATCCGAAAGCGTTCCG.1	1.71987	1.30217	1.6586	Epithelial cells_12	Epithelial cells
P1_ATCCGAAAGGGATGGG.1	1.67043	1.28368	1.63675	Epithelial cells_12	Epithelial cells
P1_ATCCGAACAAACGTGG.1	1.68835	1.14691	1.58506	CD8+ T-cells_2	CD8+ T-cells
P1_ATCCGAACAAAGGAAG.1	1.67613	1.26851	1.60715	Endothelial cells_6	Endothelial cells
P1_ATCCGAACATCACGAT.1	1.5247	1.14383	1.5472	Epithelial cells_0	Epithelial cells
P1_ATCCGAAGTGCCTGCA.1	1.55792	1.12765	1.59787	Epithelial cells_8	Epithelial cells
P1_ATCCGAAGTTCCAACA.1	1.66148	1.16322	1.59852	Epithelial cells_11	Epithelial cells
P1_ATCCGAATCCAAAGTC.1	1.51011	1.16513	1.57462	Epithelial cells_0	Epithelial cells
P1_ATCCGAATCCCGGATG.1	1.61635	1.39506	1.71824	Fibroblasts_3	Fibroblasts
P1_ATCCGAATCGGAAACG.1	1.70093	1.20429	1.59904	CD8+ T-cells_2	CD8+ T-cells
P1_ATCCGAATCTGGTATG.1	1.51499	1.16386	1.58809	Epithelial cells_12	Epithelial cells
P1_ATCGAGTAGACTAGAT.1	1.69175	1.19593	1.5735	CD8+ T-cells_2	CD8+ T-cells
P1_ATCGAGTAGATCGGGT.1	1.72139	1.26281	1.60731	Epithelial cells_0	Epithelial cells
P1_ATCGAGTAGGATGGAA.1	1.68474	1.21169	1.60282	Epithelial cells_12	Epithelial cells
P1_ATCGAGTCAAGCGATG.1	1.64726	1.18768	1.57903	Epithelial cells_12	Epithelial cells
P1_ATCGAGTGTCCAGTTA.1	1.73338	1.27357	1.64724	Epithelial cells_10	Epithelial cells
P1_ATCGAGTTCTGGAGCC.1	1.62785	1.20845	1.53413	Epithelial cells_11	Epithelial cells
P1_ATCTACTAGTCTTGCA.1	1.57378	1.09128	1.52435	Epithelial cells_12	Epithelial cells
P1_ATCTACTCAACCGCCA.1	1.60163	1.2528	1.58436	CD8+ T-cells_4	CD8+ T-cells
P1_ATCTACTCAGACAAGC.1	1.6511	1.22089	1.62136	Epithelial cells_12	Epithelial cells
P1_ATCTACTCAGGGTACA.1	1.66093	1.26251	1.65765	Epithelial cells_10	Epithelial cells
P1_ATCTACTCATAACCTG.1	1.67892	1.24694	1.64682	Epithelial cells_0	Epithelial cells
P1_ATCTACTCATGAACCT.1	1.6472	1.17074	1.58627	Epithelial cells_18	Epithelial cells
P1_ATCTACTGTAAAGTCA.1	1.62928	1.25952	1.61272	Fibroblasts_3	Fibroblasts
P1_ATCTACTTCCAAACAC.1	1.63284	1.29139	1.64571	Fibroblasts_3	Fibroblasts
P1_ATCTACTTCCAACCAA.1	1.71645	1.20985	1.6987	Myofibroblasts_5	Myofibroblasts
P1_ATCTACTTCTCCGGTT.1	1.56552	1.09194	1.5562	Epithelial cells_7	Epithelial cells
P1_ATCTGCCCACTTGGAT.1	1.63708	1.1716	1.65377	Fibroblasts_19	Fibroblasts
P1_ATCTGCCCAGACAGGT.1	1.68548	1.15889	1.56719	Epithelial cells_11	Epithelial cells
P1_ATCTGCCCAGTATGCT.1	1.59443	1.24456	1.573	Epithelial cells_12	Epithelial cells
P1_ATCTGCCGTACTTCTT.1	1.66128	1.15753	1.6102	Epithelial cells_11	Epithelial cells
P1_ATCTGCCGTTCTGGTA.1	1.60634	1.26157	1.60996	Epithelial cells_11	Epithelial cells
P1_ATCTGCCTCAGTGTTG.1	1.66854	1.23814	1.65467	Endothelial cells_6	Endothelial cells
P1_ATCTGCCTCGCCATAA.1	1.60052	1.29376	1.61459	Epithelial cells_11	Epithelial cells
P1_ATGAGGGCACATTCGA.1	1.6323	1.16475	1.60557	Epithelial cells_8	Epithelial cells
P1_ATGAGGGGTAAATGTG.1	1.59987	1.13075	1.55902	Epithelial cells_11	Epithelial cells
P1_ATGCGATAGACTCGGA.1	1.6275	1.25064	1.61032	Epithelial cells_8	Epithelial cells
P1_ATGCGATAGAGCTATA.1	1.56644	1.25639	1.62554	Epithelial cells_11	Epithelial cells
P1_ATGCGATAGAGTACCG.1	1.68609	1.17964	1.57328	CD8+ T-cells_2	CD8+ T-cells
P1_ATGCGATCACCACCAG.1	1.74214	1.35232	1.64959	Epithelial cells_10	Epithelial cells
P1_ATGCGATGTCGACTGC.1	1.69741	1.22527	1.59234	CD8+ T-cells_2	CD8+ T-cells
P1_ATGCGATGTCTTGCGG.1	1.5521	1.32567	1.58809	Epithelial cells_12	Epithelial cells
P1_ATGCGATTCACCGGGT.1	1.62139	1.14561	1.61502	Epithelial cells_12	Epithelial cells
P1_ATGCGATTCTCAACTT.1	1.72779	1.30734	1.72182	Epithelial cells_8	Epithelial cells
P1_ATGCGATTCTGTTTGT.1	1.69108	1.19817	1.60458	CD8+ T-cells_2	CD8+ T-cells
P1_ATGCGATTCTTCGAGA.1	1.67685	1.24184	1.61713	Fibroblasts_3	Fibroblasts
P1_ATGGGAGAGTACGACG.1	1.73887	1.1625	1.60421	CD8+ T-cells_2	CD8+ T-cells
P1_ATGGGAGGTAAGCACG.1	1.63417	1.21735	1.63382	Epithelial cells_0	Epithelial cells
P1_ATGGGAGGTGCTTCTC.1	1.65419	1.2794	1.62864	Macrophages_14	Macrophages
P1_ATGGGAGTCCTTTCTC.1	1.69314	1.19191	1.66432	Epithelial cells_12	Epithelial cells
P1_ATGGGAGTCTACCTGC.1	1.61746	1.12615	1.59347	Epithelial cells_1	Epithelial cells
P1_ATGGGAGTCTATCCTA.1	1.62335	1.35518	1.62314	Myofibroblasts_5	Myofibroblasts
P1_ATGTGTGCAAGTTCTG.1	1.70874	1.17381	1.67037	Monocytes_15	Monocytes
P1_ATGTGTGCACACTGCG.1	1.66886	1.25595	1.60719	Epithelial cells_1	Epithelial cells
P1_ATGTGTGGTTAAGTAG.1	1.52994	1.27405	1.58883	Epithelial cells_11	Epithelial cells
P1_ATGTGTGGTTCCACAA.1	1.64404	1.17576	1.57861	Epithelial cells_12	Epithelial cells
P1_ATTACTCCACATGGGA.1	1.61325	1.18717	1.58853	Epithelial cells_12	Epithelial cells
P1_ATTACTCCATGCTGGC.1	1.5921	1.30887	1.58884	Epithelial cells_11	Epithelial cells
P1_ATTACTCGTGAGCGAT.1	1.67741	1.29692	1.623	Epithelial cells_8	Epithelial cells
P1_ATTACTCGTTACCGAT.1	1.63849	1.19048	1.63816	Endothelial cells_6	Endothelial cells
P1_ATTACTCTCCTAGGGC.1	1.59339	1.2205	1.61826	Epithelial cells_11	Epithelial cells
P1_ATTATCCAGCATCATC.1	1.54682	1.23161	1.59441	Epithelial cells_11	Epithelial cells
P1_ATTATCCAGGCATGGT.1	1.68038	1.18105	1.58744	Epithelial cells_13	Epithelial cells
P1_ATTATCCCACCAGCAC.1	1.60397	1.16828	1.56723	CD8+ T-cells_2	CD8+ T-cells
P1_ATTATCCCAGACGCCT.1	1.56516	1.05341	1.58666	Epithelial cells_12	Epithelial cells
P1_ATTATCCCAGGCAGTA.1	1.69085	1.15472	1.6171	Epithelial cells_7	Epithelial cells
P1_ATTATCCGTGCACGAA.1	1.73996	1.2598	1.58864	Epithelial cells_0	Epithelial cells
P1_ATTATCCTCAATCTCT.1	1.59015	1.31082	1.611	Epithelial cells_12	Epithelial cells
P1_ATTATCCTCACGCATA.1	1.69137	1.23155	1.64339	Epithelial cells_10	Epithelial cells
P1_ATTATCCTCGGTGTTA.1	1.6257	1.08419	1.58948	CD8+ T-cells_4	CD8+ T-cells
P1_ATTCTACAGTGGACGT.1	1.63312	1.19578	1.57996	Epithelial cells_7	Epithelial cells
P1_ATTCTACGTCGGGTCT.1	1.64414	1.22551	1.61848	CD8+ T-cells_2	CD8+ T-cells
P1_ATTCTACTCCGTTGTC.1	1.76096	1.33585	1.68201	Epithelial cells_1	Epithelial cells
P1_ATTCTACTCGCAAGCC.1	1.66653	1.21128	1.56791	Epithelial cells_11	Epithelial cells
P1_ATTCTACTCGTGGACC.1	1.68299	1.3342	1.64251	Epithelial cells_11	Epithelial cells
P1_ATTGGACCAAGCCTAT.1	1.62181	1.18289	1.60809	CD8+ T-cells_4	CD8+ T-cells
P1_ATTGGACCAAGGACTG.1	1.68534	1.19714	1.59174	Epithelial cells_10	Epithelial cells
P1_ATTGGACCAGACAAAT.1	1.70087	1.26654	1.63898	Monocytes_15	Monocytes
P1_ATTGGACGTGGTAACG.1	1.70507	1.29246	1.60437	Epithelial cells_8	Epithelial cells
P1_ATTGGACTCTAACTCT.1	1.62009	1.25442	1.59124	Epithelial cells_12	Epithelial cells
P1_ATTGGTGAGCGTTTAC.1	1.71858	1.30169	1.65494	Epithelial cells_12	Epithelial cells
P1_ATTGGTGAGGCATTGG.1	1.63522	1.2094	1.59254	Endothelial cells_6	Endothelial cells
P1_ATTGGTGCACATCTTT.1	1.6816	1.17794	1.57073	Epithelial cells_7	Epithelial cells
P1_ATTGGTGCATTATCTC.1	1.67984	1.26841	1.65162	Myofibroblasts_5	Myofibroblasts
P1_ATTGGTGGTTCAGGCC.1	1.57366	1.19854	1.56414	Epithelial cells_18	Epithelial cells
P1_ATTGGTGTCGGCATCG.1	1.59359	1.18922	1.58534	Epithelial cells_11	Epithelial cells
P1_ATTTCTGAGAATTCCC.1	1.60611	1.35622	1.67333	Epithelial cells_8	Epithelial cells
P1_ATTTCTGAGAGAACAG.1	1.59314	1.16347	1.61094	Endothelial cells_6	Endothelial cells
P1_ATTTCTGAGAGGTACC.1	1.65574	1.26449	1.67387	Monocytes_15	Monocytes
P1_ATTTCTGAGGACGAAA.1	1.59388	1.12694	1.55403	Epithelial cells_12	Epithelial cells
P1_ATTTCTGAGGAGTTGC.1	1.57719	1.13119	1.56478	CD8+ T-cells_4	CD8+ T-cells
P1_ATTTCTGAGGGTGTGT.1	1.55258	1.16962	1.57588	Epithelial cells_10	Epithelial cells
P1_ATTTCTGAGTCAAGGC.1	1.6209	1.11055	1.58218	Epithelial cells_11	Epithelial cells
P1_ATTTCTGCACGTCTCT.1	1.67433	1.19876	1.56573	Epithelial cells_7	Epithelial cells
P1_ATTTCTGGTCCCTACT.1	1.62633	1.38146	1.68671	Macrophages_26	Macrophages
P1_ATTTCTGGTGCGATAG.1	1.66616	1.20447	1.63084	Endothelial cells_6	Endothelial cells
P1_ATTTCTGGTTCTGTTT.1	1.61819	1.33774	1.6562	Epithelial cells_10	Epithelial cells
P1_CAACCAAAGATCACGG.1	1.67093	1.21689	1.6397	Fibroblasts_19	Fibroblasts
P1_CAACCAAAGCGATGAC.1	1.62004	1.2286	1.60684	Epithelial cells_7	Epithelial cells
P1_CAACCAACATCGGTTA.1	1.67697	1.27583	1.57232	Epithelial cells_12	Epithelial cells
P1_CAACCAAGTTTGGGCC.1	1.64446	1.25019	1.68033	Fibroblasts_19	Fibroblasts
P1_CAACCAATCATGCATG.1	1.71358	1.23876	1.63667	Epithelial cells_18	Epithelial cells
P1_CAACCAATCCGCGCAA.1	1.68827	1.2897	1.63038	Fibroblasts_3	Fibroblasts
P1_CAACCAATCCTAAGTG.1	1.5709	1.24328	1.56046	Epithelial cells_7	Epithelial cells
P1_CAACCAATCGCATGGC.1	1.71914	1.18669	1.60637	Epithelial cells_11	Epithelial cells
P1_CAACCTCAGAAGATTC.1	1.57863	1.27673	1.63799	Fibroblasts_3	Fibroblasts
P1_CAACCTCAGAGCTTCT.1	1.71462	1.20645	1.61421	Epithelial cells_7	Epithelial cells
P1_CAACCTCAGATACACA.1	1.60973	1.21242	1.57985	Epithelial cells_18	Epithelial cells
P1_CAACCTCAGGGTGTTG.1	1.59218	1.2051	1.60478	CD8+ T-cells_4	CD8+ T-cells
P1_CAACCTCCAAACGCGA.1	1.54505	1.2519	1.62339	Monocytes_15	Monocytes
P1_CAACCTCCAAGTCATC.1	1.75435	1.18156	1.60219	Epithelial cells_12	Epithelial cells
P1_CAACCTCCACGTCAGC.1	1.66259	1.31576	1.63637	Macrophages_14	Macrophages
P1_CAACCTCGTTCGCGAC.1	1.63979	1.21406	1.57364	Epithelial cells_11	Epithelial cells
P1_CAACCTCTCAATCACG.1	1.51546	1.15856	1.59277	Epithelial cells_13	Epithelial cells
P1_CAACCTCTCCTTGCCA.1	1.62066	1.25611	1.58678	Epithelial cells_11	Epithelial cells
P1_CAACCTCTCTTCATGT.1	1.73238	1.29647	1.69243	Epithelial cells_8	Epithelial cells
P1_CAACTAGAGCCCAATT.1	1.60191	1.15977	1.58358	Epithelial cells_11	Epithelial cells
P1_CAACTAGCACCAGTTA.1	1.69554	1.19134	1.64496	Epithelial cells_1	Epithelial cells
P1_CAACTAGCAGCTGGCT.1	1.65533	1.15936	1.57997	Monocytes_15	Monocytes
P1_CAACTAGGTATTCGTG.1	1.59357	1.15375	1.58586	Myofibroblasts_5	Myofibroblasts
P1_CAACTAGGTGTGCGTC.1	1.57818	1.19882	1.56694	Epithelial cells_13	Epithelial cells
P1_CAACTAGGTTCTGGTA.1	1.71047	1.23121	1.57662	Epithelial cells_0	Epithelial cells
P1_CAACTAGTCAAGCCTA.1	1.71844	1.18126	1.57035	Epithelial cells_18	Epithelial cells
P1_CAACTAGTCATTGCCC.1	1.63434	1.13281	1.5762	Epithelial cells_11	Epithelial cells
P1_CAAGAAAAGAATGTTG.1	1.58599	1.29641	1.54856	Epithelial cells_10	Epithelial cells
P1_CAAGAAAAGACGCACA.1	1.63203	1.12661	1.54305	CD8+ T-cells_2	CD8+ T-cells
P1_CAAGAAAAGAGGTTGC.1	1.67499	1.17398	1.60665	Epithelial cells_10	Epithelial cells
P1_CAAGAAAAGCTATGCT.1	1.65809	1.24746	1.60109	Epithelial cells_10	Epithelial cells
P1_CAAGAAACAAGCGTAG.1	1.69935	1.23551	1.61819	CD8+ T-cells_2	CD8+ T-cells
P1_CAAGAAAGTGCACCAC.1	1.61862	1.19353	1.56003	Myofibroblasts_5	Myofibroblasts
P1_CAAGATCAGAGTACAT.1	1.68287	1.26032	1.6324	Epithelial cells_8	Epithelial cells
P1_CAAGATCAGGATCGCA.1	1.6112	1.32275	1.59106	Epithelial cells_12	Epithelial cells
P1_CAAGATCAGGCATGGT.1	1.55094	1.15329	1.57452	Epithelial cells_11	Epithelial cells
P1_CAAGATCAGTGAATTG.1	1.53936	1.22435	1.59019	CD8+ T-cells_2	CD8+ T-cells
P1_CAAGATCAGTGGTAAT.1	1.65323	1.20907	1.6023	Epithelial cells_7	Epithelial cells
P1_CAAGATCCAACTGCTA.1	1.60781	1.23254	1.59375	Epithelial cells_12	Epithelial cells
P1_CAAGATCCAAGTAATG.1	1.70791	1.1463	1.682	Epithelial cells_10	Epithelial cells
P1_CAAGATCCACCGGAAA.1	1.70439	1.2592	1.6488	Epithelial cells_8	Epithelial cells
P1_CAAGATCGTAAATACG.1	1.59541	1.26729	1.59866	Epithelial cells_11	Epithelial cells
P1_CAAGATCGTGCAACTT.1	1.55107	1.20101	1.58938	Epithelial cells_11	Epithelial cells
P1_CAAGGCCAGAGTAATC.1	1.72588	1.371	1.76707	Fibroblasts_3	Fibroblasts
P1_CAAGGCCCAGCTGCTG.1	1.59095	1.25022	1.55184	Epithelial cells_1	Epithelial cells
P1_CAAGGCCTCATATCGG.1	1.63905	1.28281	1.59194	Epithelial cells_13	Epithelial cells
P1_CAAGTTGAGAGGTTAT.1	1.62916	1.30732	1.65577	Epithelial cells_10	Epithelial cells
P1_CAAGTTGCAACTGCTA.1	1.65535	1.37048	1.68248	Epithelial cells_12	Epithelial cells
P1_CAAGTTGCATGCCCGA.1	1.6709	1.23428	1.65847	Epithelial cells_1	Epithelial cells
P1_CAAGTTGGTACCAGTT.1	1.64209	1.21622	1.61769	Epithelial cells_12	Epithelial cells
P1_CAAGTTGGTTGGTGGA.1	1.67741	1.27813	1.62849	Macrophages_14	Macrophages
P1_CAAGTTGGTTGGTTTG.1	1.67823	1.25668	1.65173	Mast_9	Mast
P1_CAAGTTGTCACATGCA.1	1.69889	1.21863	1.61799	Epithelial cells_11	Epithelial cells
P1_CAAGTTGTCACCTCGT.1	1.6171	1.21372	1.65267	Epithelial cells_12	Epithelial cells
P1_CACAAACCACATGACT.1	1.62621	1.19254	1.57682	Epithelial cells_11	Epithelial cells
P1_CACAAACGTAAGAGAG.1	1.63236	1.01627	1.59576	Epithelial cells_12	Epithelial cells
P1_CACAAACGTCTGATTG.1	1.62417	1.25873	1.57398	Epithelial cells_0	Epithelial cells
P1_CACAAACTCAGCTTAG.1	1.67861	1.13336	1.59176	Epithelial cells_12	Epithelial cells
P1_CACAAACTCTGCTTGC.1	1.64043	1.26342	1.5957	Epithelial cells_8	Epithelial cells
P1_CACAAACTCTGTGCAA.1	1.64636	1.16012	1.62325	Epithelial cells_10	Epithelial cells
P1_CACACAAAGCCCAATT.1	1.59399	1.21957	1.56675	Epithelial cells_10	Epithelial cells
P1_CACACAAAGGCTCAGA.1	1.66678	1.21051	1.64885	Epithelial cells_7	Epithelial cells
P1_CACACAAAGGTCGGAT.1	1.66105	1.2799	1.59817	Epithelial cells_8	Epithelial cells
P1_CACACAAAGTGTTAGA.1	1.66596	1.15001	1.58362	Epithelial cells_11	Epithelial cells
P1_CACACAAAGTTCGATC.1	1.59374	1.16346	1.5795	Epithelial cells_18	Epithelial cells
P1_CACACAAGTTTAGGAA.1	1.62534	1.2264	1.59208	Epithelial cells_11	Epithelial cells
P1_CACACAATCGGCGGTT.1	1.60584	1.17838	1.60114	Epithelial cells_0	Epithelial cells
P1_CACACCTCAGACACTT.1	1.7001	1.26772	1.66981	Monocytes_15	Monocytes
P1_CACACCTCAGCCAATT.1	1.70146	1.24183	1.63472	Epithelial cells_8	Epithelial cells
P1_CACACCTCAGGATTGG.1	1.71815	1.2342	1.63223	Epithelial cells_10	Epithelial cells
P1_CACACCTCAGGCTCAC.1	1.6093	1.16769	1.60246	CD8+ T-cells_2	CD8+ T-cells
P1_CACACCTCAGTGGAGT.1	1.69574	1.2096	1.6442	Macrophages_14	Macrophages
P1_CACACCTGTACCGTTA.1	1.59914	1.17258	1.61436	Epithelial cells_0	Epithelial cells
P1_CACACCTGTAGAAGGA.1	1.70713	1.35921	1.61566	Epithelial cells_11	Epithelial cells
P1_CACACCTTCAACACCA.1	1.62289	1.2615	1.62726	Myofibroblasts_5	Myofibroblasts
P1_CACACCTTCGCCCTTA.1	1.59333	1.22397	1.63018	Monocytes_15	Monocytes
P1_CACACCTTCTGTCTCG.1	1.59928	1.16734	1.61846	Epithelial cells_10	Epithelial cells
P1_CACACTCAGTGGTCCC.1	1.70813	1.24509	1.64903	Epithelial cells_7	Epithelial cells
P1_CACACTCCACTATCTT.1	1.58896	1.22544	1.6041	Epithelial cells_7	Epithelial cells
P1_CACACTCTCACGACTA.1	1.59492	1.24548	1.65901	Epithelial cells_1	Epithelial cells
P1_CACACTCTCTTCAACT.1	1.70865	1.29515	1.64898	Epithelial cells_8	Epithelial cells
P1_CACAGGCAGACAGACC.1	1.54347	1.18474	1.53092	Epithelial cells_13	Epithelial cells
P1_CACAGGCCAACACCTA.1	1.6039	1.13037	1.60973	Epithelial cells_7	Epithelial cells
P1_CACAGGCCAACTGCGC.1	1.58674	1.21231	1.63082	Epithelial cells_11	Epithelial cells
P1_CACAGGCCACCCATTC.1	1.64791	1.21371	1.61323	Epithelial cells_8	Epithelial cells
P1_CACAGGCCATCACGAT.1	1.53056	1.16254	1.56945	B-cells_21	B-cells
P1_CACAGGCCATCGGAAG.1	1.56389	1.20264	1.60721	Epithelial cells_18	Epithelial cells
P1_CACAGGCGTACTTGAC.1	1.67247	1.3064	1.61102	Epithelial cells_11	Epithelial cells
P1_CACAGGCGTCCCTACT.1	1.59184	1.1818	1.5534	CD8+ T-cells_2	CD8+ T-cells
P1_CACAGTAAGAAGAAGC.1	1.66045	1.27644	1.66166	Fibroblasts_3	Fibroblasts
P1_CACAGTAAGATCTGCT.1	1.7097	1.18569	1.62693	Epithelial cells_1	Epithelial cells
P1_CACAGTAAGATGCCTT.1	1.62722	1.2155	1.61534	Epithelial cells_8	Epithelial cells
P1_CACAGTAAGCCGGTAA.1	1.56332	1.29982	1.58892	Epithelial cells_0	Epithelial cells
P1_CACAGTAAGGTGGGTT.1	1.56823	1.14895	1.59154	Epithelial cells_1	Epithelial cells
P1_CACAGTAAGTTATCGC.1	1.68202	1.21468	1.57641	Epithelial cells_18	Epithelial cells
P1_CACAGTACAAGACGTG.1	1.81032	1.25421	1.62202	Epithelial cells_12	Epithelial cells
P1_CACAGTATCAACTCTT.1	1.58287	1.09718	1.56216	Epithelial cells_1	Epithelial cells
P1_CACAGTATCCTTTCTC.1	1.58209	1.11792	1.58341	CD8+ T-cells_4	CD8+ T-cells
P1_CACAGTATCGGCGCAT.1	1.62044	1.1507	1.57517	CD8+ T-cells_2	CD8+ T-cells
P1_CACAGTATCGGTGTCG.1	1.6682	1.29864	1.64378	Epithelial cells_10	Epithelial cells
P1_CACATAGGTCCAACTA.1	1.64231	1.1797	1.64172	Epithelial cells_8	Epithelial cells
P1_CACATAGGTCCGTGAC.1	1.56202	1.14125	1.58324	Epithelial cells_11	Epithelial cells
P1_CACATAGTCATCACCC.1	1.63886	1.22195	1.58032	Epithelial cells_10	Epithelial cells
P1_CACATAGTCTCATTCA.1	1.71998	1.23365	1.62628	Epithelial cells_7	Epithelial cells
P1_CACATTTCACAGTCGC.1	1.62948	1.2343	1.61526	B-cells_21	B-cells
P1_CACATTTTCAAACAAG.1	1.69818	1.20147	1.63047	Endothelial cells_6	Endothelial cells
P1_CACATTTTCAGTCCCT.1	1.6995	1.22872	1.5815	Epithelial cells_11	Epithelial cells
P1_CACATTTTCTCTTATG.1	1.64519	1.1302	1.60699	Endothelial cells_6	Endothelial cells
P1_CACCACTCAAGGGTCA.1	1.61079	1.1914	1.62109	Epithelial cells_11	Epithelial cells
P1_CACCACTGTCCTGCTT.1	1.63674	1.2666	1.57035	Epithelial cells_12	Epithelial cells
P1_CACCACTGTGCATCTA.1	1.5531	1.20633	1.63573	Epithelial cells_12	Epithelial cells
P1_CACCACTGTTTGACAC.1	1.61144	1.187	1.54229	CD8+ T-cells_2	CD8+ T-cells
P1_CACCACTTCCCAACGG.1	1.60887	1.12577	1.58914	Epithelial cells_0	Epithelial cells
P1_CACCAGGAGCGTTGCC.1	1.69954	1.17646	1.5992	Epithelial cells_0	Epithelial cells
P1_CACCAGGCATGTTCCC.1	1.57326	1.23623	1.65162	Epithelial cells_7	Epithelial cells
P1_CACCAGGGTCCGCTGA.1	1.7152	1.21579	1.57136	Epithelial cells_12	Epithelial cells
P1_CACCAGGGTCTAGAGG.1	1.63398	1.23278	1.62732	Epithelial cells_12	Epithelial cells
P1_CACCAGGTCTTAACCT.1	1.65522	1.20677	1.5796	Epithelial cells_0	Epithelial cells
P1_CACCAGGTCTTGCAAG.1	1.7316	1.22301	1.6079	Epithelial cells_1	Epithelial cells
P1_CACCAGGTCTTGTACT.1	1.65855	1.23923	1.66249	Epithelial cells_10	Epithelial cells
P1_CACCAGGTCTTGTATC.1	1.63706	1.17553	1.58746	Epithelial cells_11	Epithelial cells
P1_CACCTTGAGACCGGAT.1	1.62831	1.13352	1.56451	Epithelial cells_11	Epithelial cells
P1_CACCTTGAGCTGGAAC.1	1.63676	1.22014	1.58965	Epithelial cells_12	Epithelial cells
P1_CACCTTGAGGATATAC.1	1.56329	1.10148	1.55682	Epithelial cells_10	Epithelial cells
P1_CACCTTGCACTCGACG.1	1.73213	1.19181	1.56013	Epithelial cells_11	Epithelial cells
P1_CACCTTGCAGACGCCT.1	1.71671	1.21981	1.64405	Epithelial cells_0	Epithelial cells
P1_CACCTTGCAGGATTGG.1	1.52483	1.14406	1.58553	Epithelial cells_16	Epithelial cells
P1_CACCTTGCAGTTAACC.1	1.61723	1.19054	1.56912	Epithelial cells_0	Epithelial cells
P1_CACCTTGGTAGCGTGA.1	1.65568	1.17008	1.57089	Epithelial cells_12	Epithelial cells
P1_CACCTTGGTGTAAGTA.1	1.64982	1.17221	1.599	Epithelial cells_12	Epithelial cells
P1_CACCTTGGTTTGTTTC.1	1.5901	1.174	1.61716	Epithelial cells_11	Epithelial cells
P1_CACCTTGTCCCGGATG.1	1.69427	1.32446	1.60956	CD8+ T-cells_2	CD8+ T-cells
P1_CACCTTGTCGCGCCAA.1	1.56999	1.33589	1.66999	Fibroblasts_3	Fibroblasts
P1_CACCTTGTCTCCAGGG.1	1.63681	1.32487	1.63233	Epithelial cells_12	Epithelial cells
P1_CACTCCAAGCCTTGAT.1	1.70534	1.21065	1.56797	CD8+ T-cells_4	CD8+ T-cells
P1_CACTCCACAAAGTGCG.1	1.44767	1.27396	1.59163	Epithelial cells_7	Epithelial cells
P1_CACTCCACACCAACCG.1	1.68046	1.10505	1.61385	Epithelial cells_12	Epithelial cells
P1_CACTCCACATCCCATC.1	1.61168	1.22611	1.57971	Epithelial cells_12	Epithelial cells
P1_CACTCCAGTTCCACTC.1	1.6569	1.14924	1.63392	Fibroblasts_19	Fibroblasts
P1_CACTCCATCTGTGCAA.1	1.60448	1.2802	1.66599	Epithelial cells_8	Epithelial cells
P1_CAGAATCAGAACTCGG.1	1.58007	1.19118	1.60585	Epithelial cells_1	Epithelial cells
P1_CAGAATCAGAGTACAT.1	1.62827	1.16289	1.59034	Epithelial cells_11	Epithelial cells
P1_CAGAATCAGAGTCGGT.1	1.70958	1.29869	1.64453	Epithelial cells_8	Epithelial cells
P1_CAGAATCAGGGATACC.1	1.54069	1.16197	1.58596	Epithelial cells_12	Epithelial cells
P1_CAGAATCAGTGGGTTG.1	1.64306	1.17205	1.63617	Epithelial cells_8	Epithelial cells
P1_CAGAATCCATTGGCGC.1	1.67409	1.10232	1.56687	Epithelial cells_10	Epithelial cells
P1_CAGAATCGTTCAGTAC.1	1.6276	1.17559	1.58429	Epithelial cells_11	Epithelial cells
P1_CAGAATCTCACTATTC.1	1.64987	1.27689	1.62762	Epithelial cells_12	Epithelial cells
P1_CAGAATCTCCTCAACC.1	1.68112	1.35734	1.66847	Macrophages_26	Macrophages
P1_CAGAATCTCGAGGTAG.1	1.60663	1.21418	1.5952	Fibroblasts_3	Fibroblasts
P1_CAGAGAGGTTCGAATC.1	1.72164	1.32449	1.66969	Monocytes_15	Monocytes
P1_CAGATCAAGAAGAAGC.1	1.59442	1.16913	1.62991	Epithelial cells_10	Epithelial cells
P1_CAGATCAAGACACGAC.1	1.68214	1.16135	1.63947	Epithelial cells_11	Epithelial cells
P1_CAGATCAAGAGTAATC.1	1.56567	1.22189	1.57424	Epithelial cells_11	Epithelial cells
P1_CAGATCAAGATGTGTA.1	1.64047	1.36247	1.63899	Epithelial cells_12	Epithelial cells
P1_CAGATCAAGCTCAACT.1	1.69449	1.30095	1.64145	Epithelial cells_10	Epithelial cells
P1_CAGATCAAGGCATGTG.1	1.69188	1.22246	1.576	Epithelial cells_7	Epithelial cells
P1_CAGATCACAACACGCC.1	1.71737	1.18914	1.61374	Epithelial cells_7	Epithelial cells
P1_CAGATCACACTCGACG.1	1.59308	1.25424	1.60092	Epithelial cells_13	Epithelial cells
P1_CAGATCACAGGGCATA.1	1.57378	1.22336	1.61874	CD8+ T-cells_2	CD8+ T-cells
P1_CAGATCACAGTTTACG.1	1.65593	1.19073	1.60168	Epithelial cells_11	Epithelial cells
P1_CAGATCACATCCGTGG.1	1.56231	1.20379	1.5876	B-cells_21	B-cells
P1_CAGATCAGTTTGACAC.1	1.64474	1.17154	1.59459	Epithelial cells_1	Epithelial cells
P1_CAGATCATCCTCATTA.1	1.58092	1.28291	1.61743	Epithelial cells_12	Epithelial cells
P1_CAGCAGCAGAAGGGTA.1	1.6386	1.13747	1.59108	CD8+ T-cells_2	CD8+ T-cells
P1_CAGCAGCAGCCGGTAA.1	1.6441	1.14077	1.5679	Epithelial cells_1	Epithelial cells
P1_CAGCAGCAGGCAAAGA.1	1.56079	1.13765	1.62861	Epithelial cells_7	Epithelial cells
P1_CAGCAGCAGGTGCACA.1	1.71032	1.23509	1.65439	Monocytes_15	Monocytes
P1_CAGCAGCCAAACCTAC.1	1.60481	1.15637	1.58691	CD8+ T-cells_4	CD8+ T-cells
P1_CAGCAGCCACGCTTTC.1	1.72483	1.26476	1.66532	Fibroblasts_3	Fibroblasts
P1_CAGCAGCCACGTAAGG.1	1.56648	1.17816	1.59829	CD8+ T-cells_2	CD8+ T-cells
P1_CAGCAGCCAGTATCTG.1	1.6729	1.20621	1.59674	Epithelial cells_11	Epithelial cells
P1_CAGCAGCGTCAGAGGT.1	1.66869	1.11312	1.59315	Epithelial cells_7	Epithelial cells
P1_CAGCAGCGTCGCTTCT.1	1.62707	1.30932	1.63342	Epithelial cells_7	Epithelial cells
P1_CAGCAGCGTCTCGTTC.1	1.6258	1.24061	1.52936	Epithelial cells_12	Epithelial cells
P1_CAGCAGCTCACCCTCA.1	1.6146	1.21988	1.59973	Epithelial cells_18	Epithelial cells
P1_CAGCAGCTCTGTACGA.1	1.65195	1.29337	1.63081	Fibroblasts_3	Fibroblasts
P1_CAGCATAAGTTGAGTA.1	1.65542	1.18393	1.58188	Epithelial cells_7	Epithelial cells
P1_CAGCATACAAACAACA.1	1.65854	1.17734	1.62018	Macrophages_14	Macrophages
P1_CAGCATACAGAGTGTG.1	1.68276	1.11055	1.58402	Epithelial cells_13	Epithelial cells
P1_CAGCATAGTACCCAAT.1	1.67676	1.23121	1.60427	Epithelial cells_7	Epithelial cells
P1_CAGCATATCCACGTTC.1	1.71705	1.15949	1.58822	Epithelial cells_12	Epithelial cells
P1_CAGCATATCGGCGCTA.1	1.64619	1.27599	1.60425	Epithelial cells_0	Epithelial cells
P1_CAGCCGAAGAACTCGG.1	1.66604	1.41472	1.67793	Epithelial cells_7	Epithelial cells
P1_CAGCCGAAGAACTGTA.1	1.64546	1.14524	1.56912	Epithelial cells_0	Epithelial cells
P1_CAGCCGAAGGTGTTAA.1	1.59234	1.18259	1.63801	Myofibroblasts_5	Myofibroblasts
P1_CAGCCGACAATAGAGT.1	1.64938	1.11092	1.57416	CD8+ T-cells_4	CD8+ T-cells
P1_CAGCCGACATAAGACA.1	1.60516	1.33002	1.65496	Epithelial cells_8	Epithelial cells
P1_CAGCCGAGTCAAACTC.1	1.65566	1.30463	1.59236	Macrophages_14	Macrophages
P1_CAGCCGAGTGCAGTAG.1	1.66657	1.21187	1.62992	Epithelial cells_10	Epithelial cells
P1_CAGCCGAGTGGGTATG.1	1.70242	1.13984	1.60851	Epithelial cells_12	Epithelial cells
P1_CAGCCGATCCCTCTTT.1	1.57828	1.15732	1.57211	Epithelial cells_7	Epithelial cells
P1_CAGCCGATCTTCGAGA.1	1.64227	1.23443	1.57029	Epithelial cells_12	Epithelial cells
P1_CAGCGACAGAGCTGGT.1	1.71918	1.19994	1.55894	Epithelial cells_11	Epithelial cells
P1_CAGCGACAGTACACCT.1	1.63374	1.16143	1.59855	Epithelial cells_11	Epithelial cells
P1_CAGCGACCAAACGTGG.1	1.66977	1.12487	1.57128	CD8+ T-cells_2	CD8+ T-cells
P1_CAGCGACCACATTCGA.1	1.59053	1.18355	1.60634	CD8+ T-cells_2	CD8+ T-cells
P1_CAGCGACCATAGAAAC.1	1.6594	1.29401	1.642	Fibroblasts_3	Fibroblasts
P1_CAGCGACGTGATAAAC.1	1.66473	1.25887	1.59569	Epithelial cells_7	Epithelial cells
P1_CAGCGACGTTCGCGAC.1	1.69082	1.32919	1.60966	Epithelial cells_12	Epithelial cells
P1_CAGCGACTCCTCAATT.1	1.72371	1.19615	1.66469	Macrophages_26	Macrophages
P1_CAGCGACTCGTATCAG.1	1.69073	1.19222	1.59967	Epithelial cells_0	Epithelial cells
P1_CAGCGACTCTACTATC.1	1.54639	1.1168	1.55244	Epithelial cells_12	Epithelial cells
P1_CAGCTAAAGATCGGGT.1	1.72671	1.23263	1.64295	Epithelial cells_11	Epithelial cells
P1_CAGCTAAAGCGCTTAT.1	1.55276	1.16833	1.58348	Epithelial cells_11	Epithelial cells
P1_CAGCTAAAGGTCATCT.1	1.63909	1.15118	1.56815	Epithelial cells_11	Epithelial cells
P1_CAGCTAACACTGCCAG.1	1.64085	1.16309	1.55944	Epithelial cells_0	Epithelial cells
P1_CAGCTAACAGTGAGTG.1	1.70005	1.12759	1.58974	Epithelial cells_12	Epithelial cells
P1_CAGCTAACATACCATG.1	1.59046	1.30741	1.62724	Epithelial cells_10	Epithelial cells
P1_CAGCTAACATGGTCTA.1	1.61782	1.24858	1.63273	Epithelial cells_13	Epithelial cells
P1_CAGCTAAGTCATTAGC.1	1.56601	1.18638	1.58501	Epithelial cells_12	Epithelial cells
P1_CAGCTAAGTTGAGTTC.1	1.58511	1.26395	1.57574	Epithelial cells_11	Epithelial cells
P1_CAGCTAATCAGGTTCA.1	1.54976	1.04908	1.56684	B-cells_21	B-cells
P1_CAGCTAATCGTGTAGT.1	1.73351	1.21916	1.63798	Macrophages_26	Macrophages
P1_CAGCTGGAGAAACCAT.1	1.65304	1.22693	1.60493	CD8+ T-cells_2	CD8+ T-cells
P1_CAGCTGGAGACCACGA.1	1.63186	1.31595	1.62006	Epithelial cells_0	Epithelial cells
P1_CAGCTGGAGCGCCTCA.1	1.67324	1.29093	1.66586	CD8+ T-cells_4	CD8+ T-cells
P1_CAGCTGGAGCGCTTAT.1	1.70594	1.14651	1.59042	CD8+ T-cells_4	CD8+ T-cells
P1_CAGCTGGAGTACTTGC.1	1.65599	1.17755	1.64848	Endothelial cells_6	Endothelial cells
P1_CAGCTGGCAGCGATCC.1	1.6734	1.13559	1.60895	Epithelial cells_11	Epithelial cells
P1_CAGCTGGGTACGCACC.1	1.74945	1.19849	1.63263	Epithelial cells_1	Epithelial cells
P1_CAGCTGGGTGAGGGTT.1	1.65602	1.11746	1.58044	Epithelial cells_11	Epithelial cells
P1_CAGCTGGTCAGGTAAA.1	1.6342	1.32144	1.64742	Epithelial cells_11	Epithelial cells
P1_CAGCTGGTCTGCGTAA.1	1.69724	1.13752	1.61835	Epithelial cells_10	Epithelial cells
P1_CAGGTGCAGAGTGAGA.1	1.49477	1.24542	1.57086	Epithelial cells_8	Epithelial cells
P1_CAGGTGCAGATATACG.1	1.53973	1.15483	1.57174	Epithelial cells_11	Epithelial cells
P1_CAGGTGCCAGGTCGTC.1	1.61337	1.10041	1.60079	Epithelial cells_11	Epithelial cells
P1_CAGGTGCGTCCGAACC.1	1.61936	1.27742	1.65463	Endothelial cells_6	Endothelial cells
P1_CAGGTGCGTTGTCTTT.1	1.65452	1.22917	1.58892	Epithelial cells_10	Epithelial cells
P1_CAGGTGCTCGCATGAT.1	1.64137	1.35826	1.68114	Epithelial cells_8	Epithelial cells
P1_CAGTAACAGAAACCTA.1	1.71758	1.18061	1.58162	Epithelial cells_1	Epithelial cells
P1_CAGTAACAGAAGGTGA.1	1.65868	1.20074	1.616	Epithelial cells_10	Epithelial cells
P1_CAGTAACAGAATCTCC.1	1.68349	1.26849	1.61998	Epithelial cells_7	Epithelial cells
P1_CAGTAACAGCCCTAAT.1	1.59861	1.25536	1.60026	Epithelial cells_8	Epithelial cells
P1_CAGTAACAGCTTCGCG.1	1.51798	1.27591	1.59993	Monocytes_15	Monocytes
P1_CAGTAACAGTCTCCTC.1	1.61856	1.17737	1.58521	Epithelial cells_11	Epithelial cells
P1_CAGTAACGTACAGTGG.1	1.63447	1.23679	1.57736	Epithelial cells_10	Epithelial cells
P1_CAGTAACGTAGCGTCC.1	1.66537	1.2031	1.60608	CD8+ T-cells_2	CD8+ T-cells
P1_CAGTAACGTCTAAAGA.1	1.64551	1.20061	1.58708	Endothelial cells_6	Endothelial cells
P1_CAGTAACGTTGGTTTG.1	1.71172	1.18796	1.58607	Epithelial cells_12	Epithelial cells
P1_CAGTAACTCACTGGGC.1	1.80235	1.20031	1.57449	Epithelial cells_1	Epithelial cells
P1_CAGTAACTCACTTCAT.1	1.70177	1.31378	1.63245	Epithelial cells_8	Epithelial cells
P1_CAGTAACTCCGAGCCA.1	1.65031	1.15487	1.62483	Epithelial cells_1	Epithelial cells
P1_CAGTAACTCTAGCACA.1	1.56803	1.19233	1.61565	Epithelial cells_11	Epithelial cells
P1_CAGTAACTCTCCGGTT.1	1.68121	1.30617	1.6393	Epithelial cells_8	Epithelial cells
P1_CAGTCCTAGAAACCGC.1	1.53486	1.20501	1.56878	Epithelial cells_1	Epithelial cells
P1_CATATGGAGAATCTCC.1	1.63775	1.2347	1.6053	Epithelial cells_0	Epithelial cells
P1_CATATGGAGAGGTACC.1	1.63937	1.28185	1.6055	Epithelial cells_12	Epithelial cells
P1_CATATGGAGCCCAATT.1	1.69397	1.17172	1.62503	Epithelial cells_12	Epithelial cells
P1_CATATGGAGGCAATTA.1	1.76914	1.23791	1.61654	Epithelial cells_18	Epithelial cells
P1_CATATGGCACAGACAG.1	1.68989	1.10908	1.65911	Epithelial cells_12	Epithelial cells
P1_CATATGGCACCGATAT.1	1.66388	1.2285	1.62724	Epithelial cells_0	Epithelial cells
P1_CATATGGGTCGTTGTA.1	1.64147	1.23602	1.55918	Epithelial cells_11	Epithelial cells
P1_CATATGGTCAGTTAGC.1	1.59936	1.07745	1.62189	Epithelial cells_11	Epithelial cells
P1_CATATGGTCCCAGGTG.1	1.58989	1.14448	1.59319	Epithelial cells_11	Epithelial cells
P1_CATATGGTCTGATTCT.1	1.60738	1.18398	1.58883	Epithelial cells_0	Epithelial cells
P1_CATATTCAGATAGTCA.1	1.62288	1.12181	1.6022	Epithelial cells_0	Epithelial cells
P1_CATATTCCAGGATCGA.1	1.67306	1.1396	1.55985	Epithelial cells_11	Epithelial cells
P1_CATATTCCATCACGAT.1	1.65039	1.14723	1.64934	Epithelial cells_8	Epithelial cells
P1_CATATTCGTACACCGC.1	1.69515	1.1312	1.59698	Epithelial cells_18	Epithelial cells
P1_CATATTCGTCCATCCT.1	1.62265	1.25966	1.62807	Epithelial cells_11	Epithelial cells
P1_CATATTCGTCTTCTCG.1	1.63015	1.12267	1.62001	Epithelial cells_11	Epithelial cells
P1_CATATTCGTGATGTCT.1	1.72907	1.27553	1.62113	Epithelial cells_11	Epithelial cells
P1_CATATTCTCAAGCCTA.1	1.62679	1.15874	1.5311	Epithelial cells_1	Epithelial cells
P1_CATCAAGAGCCCAACC.1	1.58779	1.19999	1.57515	Epithelial cells_11	Epithelial cells
P1_CATCAAGCAAACAACA.1	1.64615	1.28886	1.66878	Epithelial cells_7	Epithelial cells
P1_CATCAAGCAACTGCTA.1	1.66433	1.26457	1.66582	Epithelial cells_0	Epithelial cells
P1_CATCAAGGTAGAAAGG.1	1.66683	1.21582	1.60515	Epithelial cells_0	Epithelial cells
P1_CATCAAGGTGATAAAC.1	1.56495	1.12063	1.58683	Epithelial cells_0	Epithelial cells
P1_CATCAAGTCAAGGCTT.1	1.66351	1.14918	1.61032	Epithelial cells_11	Epithelial cells
P1_CATCAAGTCAAGGTAA.1	1.61345	1.3696	1.61525	Epithelial cells_1	Epithelial cells
P1_CATCAAGTCGTCTGCT.1	1.65703	1.15229	1.57761	Epithelial cells_11	Epithelial cells
P1_CATCAAGTCTTGAGAC.1	1.60203	1.29953	1.66997	Endothelial cells_6	Endothelial cells
P1_CATCAGAAGCGCCTTG.1	1.70947	1.19317	1.60902	Epithelial cells_11	Epithelial cells
P1_CATCAGAAGGCTAGGT.1	1.65006	1.19614	1.56272	Epithelial cells_11	Epithelial cells
P1_CATCAGAAGGTGCAAC.1	1.69168	1.13773	1.62132	Epithelial cells_0	Epithelial cells
P1_CATCAGACACTTACGA.1	1.72034	1.21314	1.56646	Epithelial cells_11	Epithelial cells
P1_CATCAGATCTGCCCTA.1	1.71807	1.21332	1.67896	Macrophages_14	Macrophages
P1_CATCAGATCTTAGAGC.1	1.73056	1.29615	1.68133	Epithelial cells_8	Epithelial cells
P1_CATCCACAGGCTAGAC.1	1.59573	1.23473	1.56669	Epithelial cells_10	Epithelial cells
P1_CATCCACAGGCTAGGT.1	1.60474	1.1618	1.56141	CD8+ T-cells_2	CD8+ T-cells
P1_CATCCACCAAAGCGGT.1	1.71226	1.22689	1.6382	Epithelial cells_7	Epithelial cells
P1_CATCCACTCACTTCAT.1	1.72487	1.30526	1.65265	Epithelial cells_8	Epithelial cells
P1_CATCCACTCTCCTATA.1	1.57957	1.27965	1.64624	Epithelial cells_13	Epithelial cells
P1_CATCGAAAGCCCAGCT.1	1.62451	1.21017	1.66442	Fibroblasts_3	Fibroblasts
P1_CATCGAACATGATCCA.1	1.65582	1.24452	1.6182	Epithelial cells_8	Epithelial cells
P1_CATCGAACATGGATGG.1	1.6523	1.09965	1.57208	CD8+ T-cells_2	CD8+ T-cells
P1_CATCGAACATTCTTAC.1	1.53735	1.23676	1.55755	Epithelial cells_0	Epithelial cells
P1_CATCGAAGTATCGCAT.1	1.69721	1.24747	1.63158	Fibroblasts_19	Fibroblasts
P1_CATCGAAGTCATTAGC.1	1.80045	1.44677	1.6937	Epithelial cells_8	Epithelial cells
P1_CATCGAAGTGTGTGCC.1	1.65261	1.19665	1.54923	Epithelial cells_0	Epithelial cells
P1_CATCGAATCAACCAAC.1	1.66437	1.10243	1.55981	Epithelial cells_12	Epithelial cells
P1_CATCGAATCACGACTA.1	1.78638	1.12795	1.61449	Epithelial cells_7	Epithelial cells
P1_CATCGAATCGCCCTTA.1	1.65912	1.13197	1.61913	Myofibroblasts_5	Myofibroblasts
P1_CATCGAATCTTGGGTA.1	1.71851	1.2585	1.61858	Epithelial cells_7	Epithelial cells
P1_CATCGGGAGCACCGCT.1	1.65073	1.25737	1.61053	CD8+ T-cells_2	CD8+ T-cells
P1_CATCGGGAGCTCTCGG.1	1.58494	1.16227	1.56988	CD8+ T-cells_2	CD8+ T-cells
P1_CATCGGGCAATGGAGC.1	1.72145	1.30038	1.67658	Epithelial cells_8	Epithelial cells
P1_CATCGGGCACATCCGG.1	1.76051	1.2906	1.61019	Epithelial cells_12	Epithelial cells
P1_CATCGGGCAGCTTAAC.1	1.69869	1.17687	1.60599	Epithelial cells_8	Epithelial cells
P1_CATGACAAGTGGAGTC.1	1.71314	1.30325	1.61769	B-cells_21	B-cells
P1_CATGACAAGTTTCCTT.1	1.61338	1.20027	1.56548	Epithelial cells_8	Epithelial cells
P1_CATGACACAACTGCGC.1	1.63098	1.11058	1.56139	Monocytes_15	Monocytes
P1_CATGACACACACGCTG.1	1.58845	1.20135	1.55814	Epithelial cells_11	Epithelial cells
P1_CATGACAGTATAAACG.1	1.72525	1.25687	1.70113	Fibroblasts_3	Fibroblasts
P1_CATGACAGTCGGCATC.1	1.60886	1.23453	1.63496	Epithelial cells_27	Epithelial cells
P1_CATGACATCAGAAATG.1	1.67762	1.26327	1.65997	Epithelial cells_8	Epithelial cells
P1_CATGCCTAGACACTAA.1	1.66116	1.36659	1.67233	Epithelial cells_7	Epithelial cells
P1_CATGCCTAGAGACTAT.1	1.59998	1.16021	1.56738	Epithelial cells_12	Epithelial cells
P1_CATGCCTAGATATGCA.1	1.62178	1.33092	1.61074	CD8+ T-cells_2	CD8+ T-cells
P1_CATGCCTAGCGAGAAA.1	1.6279	1.18925	1.5493	Epithelial cells_11	Epithelial cells
P1_CATGCCTAGCTCCCAG.1	1.64547	1.27328	1.63314	Epithelial cells_10	Epithelial cells
P1_CATGCCTAGGATGGTC.1	1.79523	1.29797	1.68144	Epithelial cells_10	Epithelial cells
P1_CATGCCTCAAGAGTCG.1	1.72046	1.21687	1.60406	Epithelial cells_0	Epithelial cells
P1_CATGCCTGTGCACCAC.1	1.60966	1.29113	1.65228	Monocytes_15	Monocytes
P1_CATGCCTGTTGGAGGT.1	1.60767	1.38062	1.58275	Epithelial cells_11	Epithelial cells
P1_CATGCCTTCCCTCAGT.1	1.60987	1.07388	1.585	Epithelial cells_0	Epithelial cells
P1_CATGCCTTCCTGCAGG.1	1.74585	1.14708	1.59597	Epithelial cells_11	Epithelial cells
P1_CATGCCTTCCTTGGTC.1	1.60042	1.25477	1.61311	Epithelial cells_7	Epithelial cells
P1_CATGGCGAGGAGTTTA.1	1.58612	1.2135	1.60016	Epithelial cells_7	Epithelial cells
P1_CATGGCGAGGTGATAT.1	1.65986	1.177	1.58637	Epithelial cells_11	Epithelial cells
P1_CATGGCGCAGCTCCGA.1	1.62009	1.17692	1.53598	Epithelial cells_11	Epithelial cells
P1_CATGGCGGTTTCGCTC.1	1.6504	1.18337	1.6017	Epithelial cells_7	Epithelial cells
P1_CATGGCGTCTGCGTAA.1	1.57384	1.20404	1.57346	Epithelial cells_12	Epithelial cells
P1_CATTATCAGAGCTGCA.1	1.76662	1.23557	1.64182	B-cells_21	B-cells
P1_CATTATCCAACGCACC.1	1.69781	1.2867	1.59846	Epithelial cells_8	Epithelial cells
P1_CATTATCCACCAGATT.1	1.62268	1.22258	1.57498	Epithelial cells_11	Epithelial cells
P1_CATTATCCATAGAAAC.1	1.62944	1.1579	1.60552	Endothelial cells_6	Endothelial cells
P1_CATTATCGTAAGTGTA.1	1.66523	1.08073	1.60005	Myofibroblasts_5	Myofibroblasts
P1_CATTATCGTATCGCAT.1	1.5734	1.29675	1.56901	Epithelial cells_0	Epithelial cells
P1_CATTATCGTTAGATGA.1	1.69271	1.34727	1.60986	Epithelial cells_11	Epithelial cells
P1_CATTATCTCTATGTGG.1	1.62463	1.18053	1.57417	Epithelial cells_0	Epithelial cells
P1_CATTCGCAGAGTGAGA.1	1.71092	1.21291	1.59866	Epithelial cells_0	Epithelial cells
P1_CATTCGCAGATGCCTT.1	1.67589	1.14607	1.60295	Epithelial cells_10	Epithelial cells
P1_CATTCGCAGTACGACG.1	1.58424	1.13047	1.55384	Epithelial cells_0	Epithelial cells
P1_CATTCGCCAACTGCTA.1	1.67259	1.25801	1.64817	Macrophages_26	Macrophages
P1_CATTCGCCACCAGTTA.1	1.56065	1.13519	1.60149	Epithelial cells_11	Epithelial cells
P1_CATTCGCCACGGACAA.1	1.68363	1.25164	1.60874	Epithelial cells_11	Epithelial cells
P1_CATTCGCCAGGAATCG.1	1.58889	1.12716	1.56289	CD8+ T-cells_2	CD8+ T-cells
P1_CATTCGCCAGTCTTCC.1	1.57211	1.40421	1.58908	Epithelial cells_1	Epithelial cells
P1_CATTCGCGTTACTGAC.1	1.67497	1.16848	1.68157	Myofibroblasts_5	Myofibroblasts
P1_CCAATCCAGATCCCAT.1	1.55662	1.20442	1.62945	Epithelial cells_10	Epithelial cells
P1_CCAATCCCATCGATGT.1	1.60126	1.20129	1.59109	Monocytes_15	Monocytes
[truncated: 21,599 more rows]

## Sheet: KEGG_GSEA_Macro
ID	Description	setSize	enrichmentScore	NES	pvalue	p.adjust	qvalue	rank	leading_edge	core_enrichment
[truncated: 16 more rows]
