# Supplementary material for: Single-cell RNA combined with bulk RNA analysis to explore oxidative stress and energy metabolism factors and found a new prostate cancer oncogene MXRA8
Source: Aging (Albany NY). 2024 Mar 4;16(5):4469–502. doi: 10.18632/aging.205599 (PMC10968713; doi:10.18632/aging.205599)
Supplement: Supplementary Table 2 [file aging-16-205599-s003.xlsx]

## Sheet: AUC_res
Supplementary Table 2. Identification and expression differences of single cell active oxidative stress and metabolic population.
Cell	Majortype	AUC_OS	Active_OS	AUC_Metabolism	Active_Metabolism
P1_AAACCTGAGAGCTATA.1	Fibroblasts	0.232493	non-Active	0.247869	Metabolism-Active
P1_AAACCTGAGTGTTTGC.1	Epithelial cells	0.195718	non-Active	0.0444233	non-Active
P1_AAACCTGCAGTCAGCC.1	Epithelial cells	0.110721	non-Active	0.0255055	non-Active
P1_AAACCTGGTACATGTC.1	Epithelial cells	0.154664	non-Active	0.0679913	non-Active
P1_AAACCTGGTCGGCATC.1	Epithelial cells	0.197156	non-Active	0	non-Active
P1_AAACCTGGTGCAGACA.1	Epithelial cells	0.24477	non-Active	0.115515	non-Active
P1_AAACCTGTCATTCACT.1	Epithelial cells	0.207844	non-Active	0.0712675	non-Active
P1_AAACCTGTCTTGAGGT.1	Epithelial cells	0.11734	non-Active	0.0230748	non-Active
P1_AAACGGGAGAGCCTAG.1	Epithelial cells	0.138551	non-Active	0.0653843	non-Active
P1_AAACGGGCAATAAGCA.1	Epithelial cells	0.105307	non-Active	0.0604876	non-Active
P1_AAACGGGGTAGGCATG.1	Epithelial cells	0.150945	non-Active	0.0355105	non-Active
P1_AAACGGGGTCGACTAT.1	Epithelial cells	0.256218	OS-Active	0.00327626	non-Active
P1_AAACGGGGTCGATTGT.1	Myofibroblasts	0.303165	OS-Active	0.14324	non-Active
P1_AAACGGGTCAGCTTAG.1	Epithelial cells	0.0885747	non-Active	0	non-Active
P1_AAAGATGAGACCTTTG.1	Endothelial cells	0.18772	non-Active	0.13718	non-Active
P1_AAAGATGCACCAGATT.1	Epithelial cells	0.0719706	non-Active	0.0373424	non-Active
P1_AAAGATGGTAGCGTGA.1	Myofibroblasts	0.164638	non-Active	0.0689424	non-Active
P1_AAAGATGGTTACCAGT.1	Macrophages	0.104594	non-Active	0.0529134	non-Active
P1_AAAGATGTCGACCAGC.1	Epithelial cells	0.127945	non-Active	0.144015	non-Active
P1_AAAGCAAAGACTACAA.1	Epithelial cells	0.202219	non-Active	0.0949412	non-Active
P1_AAAGCAAAGAGGTAGA.1	Endothelial cells	0.254359	non-Active	0.226626	Metabolism-Active
P1_AAAGCAAAGCTATGCT.1	CD8+ T-cells	0.0572842	non-Active	0.0436835	non-Active
P1_AAAGCAACACCGGAAA.1	Epithelial cells	0.0664749	non-Active	0.0351229	non-Active
P1_AAAGCAATCGCTAGCG.1	Epithelial cells	0.119281	non-Active	0.04622	non-Active
P1_AAAGCAATCTCAACTT.1	Epithelial cells	0.104091	non-Active	0.0195519	non-Active
P1_AAAGCAATCTCTTATG.1	Epithelial cells	0.11893	non-Active	0	non-Active
P1_AAAGTAGAGACTAGGC.1	Fibroblasts	0.224366	non-Active	0.201226	Metabolism-Active
P1_AAAGTAGAGCTGAAAT.1	Epithelial cells	0.0955321	non-Active	0.0838794	non-Active
P1_AAAGTAGAGCTGCCCA.1	Epithelial cells	0.108932	non-Active	0.0875079	non-Active
P1_AAAGTAGCATCTCGCT.1	Epithelial cells	0.101612	non-Active	0	non-Active
P1_AAAGTAGGTCACCCAG.1	Monocytes	0.15533	non-Active	0.0619672	non-Active
P1_AAAGTAGGTCCGTCAG.1	Epithelial cells	0.113691	non-Active	0.0509758	non-Active
P1_AAAGTAGTCATAGCAC.1	Epithelial cells	0.115784	non-Active	0.0632706	non-Active
P1_AAAGTAGTCCACGTTC.1	Epithelial cells	0.177021	non-Active	0.0796872	non-Active
P1_AAAGTAGTCGTTTATC.1	Epithelial cells	0.0879667	non-Active	0.0534771	non-Active
P1_AAATGCCAGCCCAACC.1	Epithelial cells	0.159423	non-Active	0.0507645	non-Active
P1_AAATGCCAGGATCGCA.1	Epithelial cells	0.134587	non-Active	0.0658423	non-Active
P1_AAATGCCAGGCAGTCA.1	Myofibroblasts	0.199448	non-Active	0.127387	non-Active
P1_AAATGCCCATCCGGGT.1	B-cells	0.167421	non-Active	0.0430494	non-Active
P1_AAATGCCCATCGACGC.1	Epithelial cells	0.0963974	non-Active	0.0290989	non-Active
P1_AAATGCCGTCCTAGCG.1	Epithelial cells	0.113235	non-Active	0.0827873	non-Active
P1_AAATGCCGTTCAGACT.1	Epithelial cells	0.0906912	non-Active	0.0333615	non-Active
P1_AAATGCCTCGCTTAGA.1	Epithelial cells	0.0654342	non-Active	0.0319171	non-Active
P1_AACACGTAGCAGACTG.1	CD8+ T-cells	0.136411	non-Active	0.0249419	non-Active
P1_AACACGTCAAGGGTCA.1	CD8+ T-cells	0.140071	non-Active	0.0808497	non-Active
P1_AACACGTCACACTGCG.1	Monocytes	0.204605	non-Active	0.0842669	non-Active
P1_AACACGTCAGATAATG.1	Epithelial cells	0.068299	non-Active	0.0332911	non-Active
P1_AACACGTCAGTACACT.1	Epithelial cells	0.121116	non-Active	0.0283591	non-Active
P1_AACACGTTCACTATTC.1	Epithelial cells	0.253809	non-Active	0.0871556	non-Active
P1_AACACGTTCATTTGGG.1	Epithelial cells	0.0815355	non-Active	0.0541816	non-Active
P1_AACACGTTCCTTTCGG.1	Epithelial cells	0.215772	non-Active	0.121962	non-Active
P1_AACCATGAGAAACCTA.1	Epithelial cells	0.121432	non-Active	0.036356	non-Active
P1_AACCATGAGTCACGCC.1	Epithelial cells	0.178903	non-Active	0.00489678	non-Active
P1_AACCATGCAATGGAAT.1	Epithelial cells	0.101145	non-Active	0.0261044	non-Active
P1_AACCATGGTCCCGACA.1	Epithelial cells	0.232481	non-Active	0.053618	non-Active
P1_AACCGCGAGAACTGTA.1	Epithelial cells	0.115071	non-Active	0.0413584	non-Active
P1_AACCGCGAGACTAGGC.1	Epithelial cells	0.221489	non-Active	0.0761291	non-Active
P1_AACCGCGAGCAATATG.1	Epithelial cells	0.128319	non-Active	0	non-Active
P1_AACCGCGCAAGCGATG.1	Epithelial cells	0.0794659	non-Active	0.0678856	non-Active
P1_AACCGCGCACGAAGCA.1	Endothelial cells	0.213258	non-Active	0.160607	non-Active
P1_AACCGCGCATCGACGC.1	Epithelial cells	0.157178	non-Active	0.0608399	non-Active
P1_AACCGCGGTACCATCA.1	CD8+ T-cells	0.181932	non-Active	0.0279363	non-Active
P1_AACCGCGGTCGCGAAA.1	Fibroblasts	0.294723	OS-Active	0.331361	Metabolism-Active
P1_AACCGCGGTCGGCTCA.1	Epithelial cells	0.118357	non-Active	0.0443176	non-Active
P1_AACCGCGTCCAAACAC.1	Epithelial cells	0.185533	non-Active	0.04083	non-Active
P1_AACCGCGTCCTTTCTC.1	CD8+ T-cells	0.0552847	non-Active	0.0397379	non-Active
P1_AACGTTGAGTTAAGTG.1	Epithelial cells	0.159095	non-Active	0.0423096	non-Active
P1_AACGTTGCAAGACGTG.1	Epithelial cells	0.120041	non-Active	0.0528077	non-Active
P1_AACGTTGGTAGGACAC.1	Epithelial cells	0.197028	non-Active	0.0709857	non-Active
P1_AACGTTGTCGGATGGA.1	Macrophages	0.283264	OS-Active	0.116184	non-Active
P1_AACGTTGTCGGTGTCG.1	Fibroblasts	0.340092	OS-Active	0.266011	Metabolism-Active
P1_AACTCAGAGACGCACA.1	Epithelial cells	0.170438	non-Active	0.0583386	non-Active
P1_AACTCAGAGGACAGAA.1	Epithelial cells	0.166649	non-Active	0.0287818	non-Active
P1_AACTCAGAGTTGTCGT.1	Epithelial cells	0.175793	non-Active	0	non-Active
P1_AACTCAGCAAAGTCAA.1	Epithelial cells	0.0845757	non-Active	0.0668287	non-Active
P1_AACTCAGCACGAAAGC.1	Epithelial cells	0.0794776	non-Active	0	non-Active
P1_AACTCAGCAGATTGCT.1	Epithelial cells	0.127571	non-Active	0	non-Active
P1_AACTCAGCAGCCACCA.1	Epithelial cells	0.123911	non-Active	0.0355105	non-Active
P1_AACTCAGGTAAGTGGC.1	Epithelial cells	0.135429	non-Active	0.0572113	non-Active
P1_AACTCAGGTAGAGTGC.1	Epithelial cells	0.11582	non-Active	0.0446347	non-Active
P1_AACTCAGGTTGACGTT.1	Epithelial cells	0.151694	non-Active	0.0601353	non-Active
P1_AACTCAGTCACCGTAA.1	Epithelial cells	0.0429017	non-Active	0	non-Active
P1_AACTCCCAGTACATGA.1	Epithelial cells	0.112288	non-Active	0	non-Active
P1_AACTCCCCAAGAGTCG.1	Epithelial cells	0.152208	non-Active	0.098464	non-Active
P1_AACTCCCCAGGAACGT.1	Monocytes	0.135815	non-Active	0.0618263	non-Active
P1_AACTCCCCATTGGGCC.1	Epithelial cells	0.165772	non-Active	0.0821179	non-Active
P1_AACTCCCGTCGACTAT.1	CD8+ T-cells	0.163808	non-Active	0	non-Active
P1_AACTCCCGTCGCTTCT.1	CD8+ T-cells	0.104828	non-Active	0.0423096	non-Active
P1_AACTCCCGTCTGCGGT.1	Epithelial cells	0.134984	non-Active	0.0525611	non-Active
P1_AACTCCCGTTCTGTTT.1	Epithelial cells	0.194607	non-Active	0.0498485	non-Active
P1_AACTCCCTCAATCTCT.1	Epithelial cells	0.101987	non-Active	0	non-Active
P1_AACTCTTAGACCACGA.1	Epithelial cells	0.122368	non-Active	0.0212429	non-Active
P1_AACTCTTAGCTGTTCA.1	Epithelial cells	0.134645	non-Active	0.0454802	non-Active
P1_AACTCTTCACAGGCCT.1	CD8+ T-cells	0.132342	non-Active	0.0288875	non-Active
P1_AACTCTTCACCAGGTC.1	Epithelial cells	0.070088	non-Active	0.0537237	non-Active
P1_AACTCTTCACCGATAT.1	Epithelial cells	0.0935443	non-Active	0.0579159	non-Active
P1_AACTCTTCAGCCAATT.1	Epithelial cells	0.0743911	non-Active	0.0195167	non-Active
P1_AACTGGTCACAAGTAA.1	Epithelial cells	0.123502	non-Active	0.0848658	non-Active
P1_AACTGGTCATTCACTT.1	Myofibroblasts	0.298617	OS-Active	0.216057	Metabolism-Active
P1_AACTGGTGTTAGATGA.1	B-cells	0.0961752	non-Active	0.0494962	non-Active
P1_AACTGGTTCATGCTCC.1	Epithelial cells	0.161481	non-Active	0.0347354	non-Active
P1_AACTGGTTCCCAAGTA.1	Epithelial cells	0.130588	non-Active	0	non-Active
P1_AACTGGTTCCTCATTA.1	CD8+ T-cells	0.134692	non-Active	0.0833157	non-Active
P1_AACTGGTTCGATGAGG.1	CD8+ T-cells	0.101051	non-Active	0.103431	non-Active
P1_AACTTTCAGAACTGTA.1	CD8+ T-cells	0.0857333	non-Active	0.0580216	non-Active
P1_AACTTTCAGATAGCAT.1	Epithelial cells	0.0796062	non-Active	0.0166984	non-Active
P1_AACTTTCAGGTACTCT.1	Mast	0.227617	non-Active	0.0413936	non-Active
P1_AACTTTCAGTACGCGA.1	Endothelial cells	0.261281	OS-Active	0.0934616	non-Active
P1_AACTTTCAGTCACGCC.1	Epithelial cells	0.112312	non-Active	0.0463961	non-Active
P1_AACTTTCAGTGGACGT.1	Epithelial cells	0.0849148	non-Active	0.042521	non-Active
P1_AACTTTCAGTGGGATC.1	Epithelial cells	0.186024	non-Active	0.0588318	non-Active
P1_AACTTTCCAAGAAAGG.1	Epithelial cells	0.174717	non-Active	0.0593955	non-Active
P1_AACTTTCCATGCAACT.1	Epithelial cells	0.122391	non-Active	0.0680969	non-Active
P1_AACTTTCGTCCCTACT.1	Epithelial cells	0.129769	non-Active	0.0318467	non-Active
P1_AACTTTCGTGTGAAAT.1	Epithelial cells	0.115176	non-Active	0.0800747	non-Active
P1_AACTTTCTCACATACG.1	Epithelial cells	0.165492	non-Active	0.0414993	non-Active
P1_AAGACCTAGCTACCTA.1	Epithelial cells	0.0988412	non-Active	0.0758472	non-Active
P1_AAGACCTCAATCACAC.1	Epithelial cells	0.132529	non-Active	0.0988163	non-Active
P1_AAGACCTCAATTCCTT.1	Epithelial cells	0.247343	non-Active	0.136581	non-Active
P1_AAGACCTCACCGATAT.1	Epithelial cells	0.111072	non-Active	0.0187416	non-Active
P1_AAGACCTCATTACCTT.1	Epithelial cells	0.123946	non-Active	0.0544282	non-Active
P1_AAGACCTGTAAACACA.1	Epithelial cells	0.177945	non-Active	0.0443881	non-Active
P1_AAGACCTTCATTGCCC.1	Epithelial cells	0.104395	non-Active	0.0179314	non-Active
P1_AAGACCTTCTAAGCCA.1	Epithelial cells	0.118462	non-Active	0.0592193	non-Active
P1_AAGCCGCAGGAGTCTG.1	Epithelial cells	0.163691	non-Active	0.0217361	non-Active
P1_AAGCCGCAGTGACATA.1	Endothelial cells	0.209364	non-Active	0.138449	non-Active
P1_AAGCCGCCAAGCCATT.1	Epithelial cells	0.214591	non-Active	0.0265624	non-Active
P1_AAGCCGCGTATCTGCA.1	Epithelial cells	0.0864115	non-Active	0.0540407	non-Active
P1_AAGCCGCGTGCTTCTC.1	Epithelial cells	0.186586	non-Active	0.0141971	non-Active
P1_AAGCCGCGTGTGACCC.1	Myofibroblasts	0.123946	non-Active	0.10012	non-Active
P1_AAGCCGCGTTTAAGCC.1	Macrophages	0.200454	non-Active	0.072888	non-Active
P1_AAGCCGCTCAAGGCTT.1	B-cells	0.112031	non-Active	0.0783485	non-Active
P1_AAGCCGCTCACAAACC.1	Epithelial cells	0.0860257	non-Active	0.0204326	non-Active
P1_AAGCCGCTCGCGGATC.1	Epithelial cells	0.115632	non-Active	0.00989925	non-Active
P1_AAGGAGCAGGCGACAT.1	Epithelial cells	0.195683	non-Active	0.000422744	non-Active
P1_AAGGAGCAGTTGTAGA.1	Epithelial cells	0.183429	non-Active	0.0277602	non-Active
P1_AAGGAGCCAAGTCTGT.1	B-cells	0.120415	non-Active	0.0639047	non-Active
P1_AAGGAGCCACTACAGT.1	Epithelial cells	0.137873	non-Active	0.04777	non-Active
P1_AAGGAGCGTATAGTAG.1	Epithelial cells	0.219525	non-Active	0.138519	non-Active
P1_AAGGAGCGTGTTGAGG.1	Epithelial cells	0.278762	OS-Active	0.0438949	non-Active
P1_AAGGAGCGTTCGTGAT.1	B-cells	0.109751	non-Active	0.0731346	non-Active
P1_AAGGCAGAGGAATTAC.1	CD8+ T-cells	0.134283	non-Active	0.0193405	non-Active
P1_AAGGCAGCACATCTTT.1	Epithelial cells	0.112908	non-Active	0.0179314	non-Active
P1_AAGGCAGCAGACTCGC.1	Epithelial cells	0.136797	non-Active	0	non-Active
P1_AAGGCAGCAGCTGTGC.1	Endothelial cells	0.279569	OS-Active	0.0997323	non-Active
P1_AAGGCAGCATCACGAT.1	Epithelial cells	0.111259	non-Active	0.0773621	non-Active
P1_AAGGCAGGTTGCTCCT.1	Endothelial cells	0.202687	non-Active	0.100472	non-Active
P1_AAGGCAGTCACAGGCC.1	Epithelial cells	0.119152	non-Active	0.0286409	non-Active
P1_AAGGCAGTCTCATTCA.1	Epithelial cells	0.0941991	non-Active	0	non-Active
P1_AAGGTTCAGAACAATC.1	Epithelial cells	0.116638	non-Active	0.00306489	non-Active
P1_AAGGTTCAGAAGAAGC.1	Epithelial cells	0.1661	non-Active	0.042521	non-Active
P1_AAGGTTCCAAGCTGAG.1	Epithelial cells	0.188422	non-Active	0.11562	non-Active
P1_AAGGTTCCACATTAGC.1	CD8+ T-cells	0.156956	non-Active	0.0414289	non-Active
P1_AAGGTTCGTAATCGTC.1	Epithelial cells	0.103706	non-Active	0.0683083	non-Active
P1_AAGGTTCTCATGCTCC.1	Epithelial cells	0.184235	non-Active	0.0779962	non-Active
P1_AAGGTTCTCGCAAACT.1	Epithelial cells	0.0841314	non-Active	0	non-Active
P1_AAGTCTGAGACAGACC.1	Epithelial cells	0.0926556	non-Active	0.0710209	non-Active
P1_AAGTCTGAGGAGTACC.1	Epithelial cells	0.20402	non-Active	0.108575	non-Active
P1_AAGTCTGCATGAACCT.1	Epithelial cells	0.228236	non-Active	0.0909603	non-Active
P1_AAGTCTGGTCTAGTGT.1	Epithelial cells	0.156008	non-Active	0.061016	non-Active
P1_AAGTCTGTCAGCGACC.1	Epithelial cells	0.0921411	non-Active	0.0493905	non-Active
P1_AAGTCTGTCCACGTGG.1	CD8+ T-cells	0.079384	non-Active	0.058867	non-Active
P1_AAGTCTGTCCAGTATG.1	Epithelial cells	0.142082	non-Active	0.0751074	non-Active
P1_AATCCAGAGGCAGTCA.1	Macrophages	0.246209	non-Active	0.298387	Metabolism-Active
P1_AATCCAGCAGCCTTGG.1	Macrophages	0.307714	OS-Active	0.287043	Metabolism-Active
P1_AATCCAGGTGCGATAG.1	Epithelial cells	0.201506	non-Active	0.0829634	non-Active
P1_AATCCAGTCTGAAAGA.1	Epithelial cells	0.179067	non-Active	0.0826816	non-Active
P1_AATCGGTAGATGGGTC.1	Epithelial cells	0.102735	non-Active	0.03544	non-Active
P1_AATCGGTCAAGAAGAG.1	Epithelial cells	0.113037	non-Active	0.0238146	non-Active
P1_AATCGGTCAGGCAGTA.1	Epithelial cells	0.163258	non-Active	0	non-Active
P1_AATCGGTCATGGAATA.1	Epithelial cells	0.154652	non-Active	0.000422744	non-Active
P1_AATCGGTGTAGCGTCC.1	CD8+ T-cells	0.105717	non-Active	0.0766927	non-Active
P1_AATCGGTGTCAAGCGA.1	Epithelial cells	0.0767765	non-Active	0.0415346	non-Active
P1_AATCGGTGTCGGCACT.1	Myofibroblasts	0.222963	non-Active	0.18953	Metabolism-Active
P1_AATCGGTGTCTGATCA.1	CD8+ T-cells	0.132026	non-Active	0.0609808	non-Active
P1_AATCGGTTCAGAGGTG.1	Epithelial cells	0.0911472	non-Active	0.00391038	non-Active
P1_AATCGGTTCCTTCAAT.1	Endothelial cells	0.229476	non-Active	0.0886352	non-Active
P1_AATCGGTTCTTTCCTC.1	CD8+ T-cells	0.149121	non-Active	0.0475234	non-Active
P1_ACACCAAAGACCGGAT.1	Macrophages	0.304019	OS-Active	0.183541	Metabolism-Active
P1_ACACCAAAGAGGGCTT.1	Epithelial cells	0.087955	non-Active	0.0381174	non-Active
P1_ACACCAAAGCGTAGTG.1	Epithelial cells	0.236351	non-Active	0.0343831	non-Active
P1_ACACCAAAGCTACCGC.1	Epithelial cells	0.182727	non-Active	0.00320581	non-Active
P1_ACACCAAAGCTTCGCG.1	Epithelial cells	0.0745899	non-Active	0.0815543	non-Active
P1_ACACCAAAGTAGGTGC.1	Myofibroblasts	0.149004	non-Active	0	non-Active
P1_ACACCAAGTACATGTC.1	Epithelial cells	0.194373	non-Active	0.0470655	non-Active
P1_ACACCAAGTCTACCTC.1	CD8+ T-cells	0.125396	non-Active	0.0418164	non-Active
P1_ACACCAAGTGCAACGA.1	Epithelial cells	0.0948422	non-Active	0	non-Active
P1_ACACCAAGTTGATTCG.1	Epithelial cells	0.129477	non-Active	0.012013	non-Active
P1_ACACCAAGTTGTGGCC.1	Epithelial cells	0.091498	non-Active	0.0620376	non-Active
P1_ACACCAATCTCATTCA.1	Monocytes	0.193485	non-Active	0.0778201	non-Active
P1_ACACCCTAGTGGCACA.1	CD8+ T-cells	0.104793	non-Active	0.0274783	non-Active
P1_ACACCCTCAAAGGCGT.1	Epithelial cells	0.213363	non-Active	0.0632002	non-Active
P1_ACACCCTCACACAGAG.1	CD8+ T-cells	0.0581962	non-Active	0.0100754	non-Active
P1_ACACCCTCAGACGTAG.1	Myofibroblasts	0.164907	non-Active	0.0856408	non-Active
P1_ACACCGGAGATCCCGC.1	Epithelial cells	0.173899	non-Active	0.0642218	non-Active
P1_ACACCGGAGGGAACGG.1	Epithelial cells	0.156488	non-Active	0.0205031	non-Active
P1_ACACCGGCACATTTCT.1	Epithelial cells	0.156979	non-Active	0.0364969	non-Active
P1_ACACCGGGTCCGTCAG.1	Epithelial cells	0.151027	non-Active	0.0406538	non-Active
P1_ACACCGGGTGTAACGG.1	Epithelial cells	0.184072	non-Active	0.136511	non-Active
P1_ACACCGGTCCACGCAG.1	Epithelial cells	0.132657	non-Active	0.0616853	non-Active
P1_ACACCGGTCGGCTACG.1	Epithelial cells	0.23061	non-Active	0.101494	non-Active
P1_ACACCGGTCTGGGCCA.1	CD8+ T-cells	0.101496	non-Active	0.0920524	non-Active
P1_ACACTGAAGAATAGGG.1	Epithelial cells	0.144011	non-Active	0	non-Active
P1_ACACTGAAGCAGGTCA.1	CD8+ T-cells	0.157131	non-Active	0.0383288	non-Active
P1_ACACTGAAGCGCCTCA.1	Epithelial cells	0.127805	non-Active	0.0378708	non-Active
P1_ACACTGACAATGGACG.1	Epithelial cells	0.149612	non-Active	0.0723244	non-Active
P1_ACACTGACAATTGCTG.1	Epithelial cells	0.0938483	non-Active	0.0480519	non-Active
P1_ACACTGACAGTTCATG.1	Epithelial cells	0.128191	non-Active	0.061016	non-Active
P1_ACACTGAGTAAGTGTA.1	Epithelial cells	0.097859	non-Active	0.0238146	non-Active
P1_ACACTGAGTGTGAATA.1	Epithelial cells	0.198115	non-Active	0.0250476	non-Active
P1_ACACTGATCACAAACC.1	Fibroblasts	0.293016	OS-Active	0.323117	Metabolism-Active
P1_ACACTGATCGCAAGCC.1	CD8+ T-cells	0.106804	non-Active	0.0319524	non-Active
P1_ACACTGATCGCAGGCT.1	Endothelial cells	0.149624	non-Active	0.0562249	non-Active
P1_ACACTGATCTATGTGG.1	Epithelial cells	0.11582	non-Active	0.0456211	non-Active
P1_ACACTGATCTGTACGA.1	Epithelial cells	0.116135	non-Active	0	non-Active
P1_ACAGCCGAGACATAAC.1	Epithelial cells	0.24746	non-Active	0.0694356	non-Active
P1_ACAGCCGAGCCACGTC.1	Endothelial cells	0.291718	OS-Active	0.151589	non-Active
P1_ACAGCCGAGCTGCAAG.1	Epithelial cells	0.0664866	non-Active	0	non-Active
P1_ACAGCCGGTATAGGGC.1	Epithelial cells	0.144853	non-Active	0.0572465	non-Active
P1_ACAGCCGTCGCCAGCA.1	Epithelial cells	0.114966	non-Active	0.0741915	non-Active
P1_ACAGCCGTCGCGCCAA.1	Epithelial cells	0.22184	non-Active	0.0185655	non-Active
P1_ACAGCTAAGGCACATG.1	Epithelial cells	0.15305	non-Active	0.0652434	non-Active
P1_ACAGCTACAGGACGTA.1	Epithelial cells	0.108628	non-Active	0.0446347	non-Active
P1_ACAGCTACATGTAGTC.1	Epithelial cells	0.167538	non-Active	0.0766575	non-Active
P1_ACAGCTAGTCACTTCC.1	CD8+ T-cells	0.0822605	non-Active	0.00338195	non-Active
P1_ACAGCTATCTTGTATC.1	Epithelial cells	0.134844	non-Active	0.0850067	non-Active
P1_ACATACGAGAGGTAGA.1	Epithelial cells	0.11216	non-Active	0.0195871	non-Active
P1_ACATACGAGATGCCTT.1	CD8+ T-cells	0.105951	non-Active	0.0320933	non-Active
P1_ACATACGAGCCAGTTT.1	Macrophages	0.324517	OS-Active	0.176284	non-Active
P1_ACATACGAGCTAACAA.1	Macrophages	0.220542	non-Active	0.0108856	non-Active
P1_ACATACGCAATCCGAT.1	Epithelial cells	0.21493	non-Active	0.0529486	non-Active
P1_ACATACGCATCACCCT.1	Monocytes	0.20485	non-Active	0.0846544	non-Active
P1_ACATACGTCCTGCAGG.1	Epithelial cells	0.0967248	non-Active	0.0109561	non-Active
P1_ACATACGTCTGGAGCC.1	Endothelial cells	0.191953	non-Active	0.0588318	non-Active
P1_ACATCAGAGCAGCGTA.1	CD8+ T-cells	0.134984	non-Active	0.0923342	non-Active
P1_ACATCAGAGGGCTTGA.1	Epithelial cells	0.165983	non-Active	0.0277249	non-Active
P1_ACATCAGCAATGCCAT.1	Myofibroblasts	0.307351	OS-Active	0.0900444	non-Active
P1_ACATCAGGTCCAGTGC.1	Epithelial cells	0.115925	non-Active	0.010322	non-Active
P1_ACATCAGGTGCAGACA.1	Epithelial cells	0.21348	non-Active	0.0440358	non-Active
P1_ACATCAGTCACTCTTA.1	Epithelial cells	0.125303	non-Active	0.0171211	non-Active
P1_ACATCAGTCATGTCTT.1	Epithelial cells	0.124811	non-Active	0.0491792	non-Active
P1_ACATCAGTCCACTCCA.1	Epithelial cells	0.154851	non-Active	0.0251532	non-Active
P1_ACATCAGTCTAACCGA.1	CD8+ T-cells	0.104115	non-Active	0	non-Active
P1_ACATGGTAGGCCCTCA.1	Epithelial cells	0.133511	non-Active	0.0777848	non-Active
P1_ACATGGTAGTCATCCA.1	Epithelial cells	0.224085	non-Active	0.039139	non-Active
P1_ACATGGTAGTCCATAC.1	CD8+ T-cells	0.083652	non-Active	0.00465018	non-Active
P1_ACATGGTCAACAACCT.1	Epithelial cells	0.104138	non-Active	0.0441767	non-Active
P1_ACATGGTGTAGCGCAA.1	Epithelial cells	0.100467	non-Active	0.0509758	non-Active
P1_ACATGGTTCACGATGT.1	Macrophages	0.167023	non-Active	0.0451279	non-Active
P1_ACCAGTAAGCTTATCG.1	Epithelial cells	0.0971107	non-Active	0.0147608	non-Active
P1_ACCAGTAAGGACAGAA.1	CD8+ T-cells	0.10947	non-Active	0.0597125	non-Active
P1_ACCAGTACAATCCGAT.1	Epithelial cells	0.0940003	non-Active	0.0771507	non-Active
P1_ACCAGTACACCTCGTT.1	Epithelial cells	0.0777704	non-Active	0.0748961	non-Active
P1_ACCAGTACATCCGTGG.1	Epithelial cells	0.100513	non-Active	0	non-Active
P1_ACCAGTACATGGGACA.1	Epithelial cells	0.165877	non-Active	0.0494962	non-Active
P1_ACCAGTAGTGTGTGCC.1	Epithelial cells	0.111622	non-Active	0.00810259	non-Active
P1_ACCAGTATCAATAAGG.1	B-cells	0.0986074	non-Active	0.0133517	non-Active
P1_ACCAGTATCTTCCTTC.1	Epithelial cells	0.105869	non-Active	0.0773621	non-Active
P1_ACCCACTAGGGTATCG.1	Epithelial cells	0.110359	non-Active	0.0562954	non-Active
P1_ACCCACTAGTCTTGCA.1	Epithelial cells	0.0800739	non-Active	0	non-Active
P1_ACCCACTCAAAGAATC.1	Epithelial cells	0.107775	non-Active	0.0189882	non-Active
P1_ACCCACTCACGAAGCA.1	Epithelial cells	0.143275	non-Active	0.0820123	non-Active
P1_ACCCACTCACTCGACG.1	B-cells	0.0808924	non-Active	0.0649968	non-Active
P1_ACCCACTGTATTCGTG.1	Mast	0.131874	non-Active	0.0558726	non-Active
P1_ACCCACTGTGTATGGG.1	CD8+ T-cells	0.0884812	non-Active	0.00961742	non-Active
P1_ACCCACTTCAACGAAA.1	Monocytes	0.179476	non-Active	0.00919467	non-Active
P1_ACCGTAACACAACGTT.1	Epithelial cells	0.158745	non-Active	0.0677094	non-Active
P1_ACCGTAACATTATCTC.1	Fibroblasts	0.273442	OS-Active	0.177623	non-Active
P1_ACCGTAAGTCAAACTC.1	Fibroblasts	0.291718	OS-Active	0.215071	Metabolism-Active
P1_ACCGTAATCGCAAACT.1	Epithelial cells	0.259328	OS-Active	0.20644	Metabolism-Active
P1_ACCGTAATCTGTCCGT.1	CD8+ T-cells	0.116135	non-Active	0.00288875	non-Active
P1_ACCGTAATCTTCAACT.1	Epithelial cells	0.124905	non-Active	0.0219827	non-Active
P1_ACCGTAATCTTGCCGT.1	Epithelial cells	0.174647	non-Active	0.0859931	non-Active
P1_ACCTTTAAGGCTAGAC.1	Epithelial cells	0.126343	non-Active	0.100648	non-Active
P1_ACCTTTACAAAGAATC.1	Epithelial cells	0.139018	non-Active	0.0425562	non-Active
P1_ACCTTTACACAACTGT.1	Monocytes	0.173992	non-Active	0.0574579	non-Active
P1_ACCTTTACACAGACAG.1	Epithelial cells	0.128705	non-Active	0.0510111	non-Active
P1_ACCTTTACAGTCGATT.1	Epithelial cells	0.124589	non-Active	0.0709857	non-Active
P1_ACCTTTACATTGTGCA.1	Epithelial cells	0.133651	non-Active	0.0462904	non-Active
P1_ACCTTTAGTATTACCG.1	Epithelial cells	0.0992622	non-Active	0.0306137	non-Active
P1_ACCTTTAGTCACAAGG.1	Endothelial cells	0.248559	non-Active	0.106426	non-Active
P1_ACCTTTAGTGGACGAT.1	Epithelial cells	0.0988061	non-Active	0.0723596	non-Active
P1_ACCTTTATCAGTTCGA.1	Epithelial cells	0.113925	non-Active	0.0557317	non-Active
P1_ACGAGCCAGAAACGAG.1	Fibroblasts	0.293109	OS-Active	0.342563	Metabolism-Active
P1_ACGAGCCAGATGTCGG.1	Fibroblasts	0.171209	non-Active	0.307018	Metabolism-Active
P1_ACGAGCCAGGTAAACT.1	Fibroblasts	0.16389	non-Active	0.147925	non-Active
P1_ACGAGCCCAACACGCC.1	Epithelial cells	0.167175	non-Active	0.0295921	non-Active
P1_ACGAGCCCAATAGCAA.1	Epithelial cells	0.138679	non-Active	0.018178	non-Active
P1_ACGAGCCCACAAGTAA.1	Epithelial cells	0.0633762	non-Active	0.0156415	non-Active
P1_ACGAGCCGTCAAAGCG.1	Epithelial cells	0.126086	non-Active	0.0345945	non-Active
P1_ACGAGCCTCATGCTCC.1	Epithelial cells	0.127618	non-Active	0.0195167	non-Active
P1_ACGAGCCTCCAGAAGG.1	Epithelial cells	0.113399	non-Active	0.0316001	non-Active
P1_ACGAGGACACCCAGTG.1	Epithelial cells	0.110441	non-Active	0.0416402	non-Active
P1_ACGAGGACACTCAGGC.1	Endothelial cells	0.297249	OS-Active	0.132178	non-Active
P1_ACGAGGACATATACCG.1	Epithelial cells	0.316191	OS-Active	0.16339	non-Active
P1_ACGAGGAGTAGCCTAT.1	Epithelial cells	0.0907847	non-Active	0.00570704	non-Active
P1_ACGAGGAGTATATCCG.1	Epithelial cells	0.117386	non-Active	0.0690834	non-Active
P1_ACGAGGAGTATCAGTC.1	CD8+ T-cells	0.103448	non-Active	0.0970901	non-Active
P1_ACGAGGATCAAACGGG.1	Epithelial cells	0.065025	non-Active	0.0104629	non-Active
P1_ACGAGGATCAATCTCT.1	Monocytes	0.197507	non-Active	0.0359332	non-Active
P1_ACGAGGATCAGTGTTG.1	Epithelial cells	0.122309	non-Active	0.0409357	non-Active
P1_ACGAGGATCATAGCAC.1	Epithelial cells	0.136084	non-Active	0.0995913	non-Active
P1_ACGAGGATCGCGTAGC.1	Epithelial cells	0.106138	non-Active	0.0299443	non-Active
P1_ACGAGGATCGTGTAGT.1	Epithelial cells	0.107716	non-Active	0.0717255	non-Active
P1_ACGAGGATCTGCGTAA.1	Epithelial cells	0.198665	non-Active	0.119531	non-Active
P1_ACGAGGATCTGCTTGC.1	B-cells	0.14704	non-Active	0.0291693	non-Active
P1_ACGATACAGCCGATTT.1	Epithelial cells	0.0878381	non-Active	0.0245896	non-Active
P1_ACGATACAGGGATGGG.1	Epithelial cells	0.174694	non-Active	0.0670753	non-Active
P1_ACGATACCAATGTAAG.1	Epithelial cells	0.0914161	non-Active	0.016029	non-Active
P1_ACGATACCACGAGAGT.1	Epithelial cells	0.0709767	non-Active	0.0684845	non-Active
P1_ACGATACCACGGTAAG.1	Endothelial cells	0.181453	non-Active	0.0789826	non-Active
P1_ACGATACCAGATGAGC.1	Myofibroblasts	0.202687	non-Active	0.131579	non-Active
P1_ACGATACCATGTCGAT.1	Macrophages	0.325464	OS-Active	0.261537	Metabolism-Active
P1_ACGATACGTGATGTCT.1	Epithelial cells	0.0891594	non-Active	0.0453393	non-Active
P1_ACGATACTCAAACGGG.1	Epithelial cells	0.124075	non-Active	0.0358627	non-Active
P1_ACGATACTCCAGTATG.1	Epithelial cells	0.138937	non-Active	0.0444585	non-Active
P1_ACGATACTCTTATCTG.1	CD8+ T-cells	0.11734	non-Active	0	non-Active
P1_ACGATGTAGCCTATGT.1	Epithelial cells	0.13399	non-Active	0.0557669	non-Active
P1_ACGATGTCAAGCTGTT.1	Epithelial cells	0.12798	non-Active	0.0726414	non-Active
P1_ACGATGTGTAAGTAGT.1	CD8+ T-cells	0.087347	non-Active	0.0400902	non-Active
P1_ACGATGTGTAGCGTAG.1	Epithelial cells	0.096678	non-Active	0.0232157	non-Active
P1_ACGATGTGTCGAATCT.1	Epithelial cells	0.205505	non-Active	0.118016	non-Active
P1_ACGATGTGTCTGCAAT.1	Epithelial cells	0.11755	non-Active	0.0528782	non-Active
P1_ACGATGTTCATACGGT.1	CD8+ T-cells	0.0689421	non-Active	0.0242725	non-Active
P1_ACGCAGCAGGCTAGCA.1	Epithelial cells	0.100583	non-Active	0.000457972	non-Active
P1_ACGCAGCCAGCCTGTG.1	Epithelial cells	0.0841314	non-Active	0.0153245	non-Active
P1_ACGCAGCCAGTCAGAG.1	Epithelial cells	0.15975	non-Active	0.0940252	non-Active
P1_ACGCAGCCATCACGTA.1	Epithelial cells	0.177126	non-Active	0.0694004	non-Active
P1_ACGCAGCGTGTAAGTA.1	Epithelial cells	0.126916	non-Active	0.0426971	non-Active
P1_ACGCCAGAGCGCTTAT.1	Epithelial cells	0.0657149	non-Active	0.0400902	non-Active
P1_ACGCCAGCACTGAAGG.1	Epithelial cells	0.133979	non-Active	0.156662	non-Active
P1_ACGCCAGTCACTTCAT.1	Epithelial cells	0.0775365	non-Active	0.00232509	non-Active
P1_ACGCCAGTCAGTGTTG.1	Epithelial cells	0.0609207	non-Active	0.024801	non-Active
P1_ACGCCAGTCCAAACTG.1	Endothelial cells	0.240806	non-Active	0.102128	non-Active
P1_ACGCCAGTCCCACTTG.1	Epithelial cells	0.108137	non-Active	0.06394	non-Active
P1_ACGCCGAAGAGTACCG.1	Epithelial cells	0.101238	non-Active	0.0207497	non-Active
P1_ACGCCGACAAATCCGT.1	Macrophages	0.254522	non-Active	0.0822236	non-Active
P1_ACGCCGACACATAACC.1	Epithelial cells	0.117305	non-Active	0.0516099	non-Active
P1_ACGCCGACAGGCGATA.1	Epithelial cells	0.22308	non-Active	0.11171	non-Active
P1_ACGCCGACAGGTTTCA.1	Epithelial cells	0.158733	non-Active	0.0361093	non-Active
P1_ACGCCGACATACCATG.1	Epithelial cells	0.071234	non-Active	0.0756006	non-Active
P1_ACGCCGACATGTAGTC.1	CD8+ T-cells	0.0966897	non-Active	0.0330445	non-Active
P1_ACGCCGAGTCGGCATC.1	Epithelial cells	0.0879316	non-Active	0	non-Active
P1_ACGCCGAGTCTTGATG.1	Epithelial cells	0.167842	non-Active	0.0457268	non-Active
P1_ACGCCGAGTTGATTGC.1	Epithelial cells	0.0966429	non-Active	0.0259283	non-Active
P1_ACGCCGATCATGGTCA.1	Endothelial cells	0.234574	non-Active	0.183753	Metabolism-Active
P1_ACGCCGATCGTTGCCT.1	Epithelial cells	0.130787	non-Active	0.0587614	non-Active
P1_ACGCCGATCTGGCGAC.1	Epithelial cells	0.107073	non-Active	0.04083	non-Active
P1_ACGGAGAAGCGATATA.1	Epithelial cells	0.0931818	non-Active	0.0630593	non-Active
P1_ACGGAGAAGCTATGCT.1	Epithelial cells	0.0830673	non-Active	0	non-Active
P1_ACGGAGAAGTGATCGG.1	Epithelial cells	0.144128	non-Active	0	non-Active
P1_ACGGAGACACAACTGT.1	Epithelial cells	0.111283	non-Active	0.0497781	non-Active
P1_ACGGAGACAGTTCATG.1	Epithelial cells	0.0760632	non-Active	0.0256464	non-Active
P1_ACGGAGACATGACATC.1	Epithelial cells	0.1833	non-Active	0.0862045	non-Active
P1_ACGGAGAGTCAGAAGC.1	Epithelial cells	0.109517	non-Active	0.0548158	non-Active
P1_ACGGAGAGTCCGTGAC.1	Epithelial cells	0.197729	non-Active	0.044071	non-Active
P1_ACGGAGATCACATAGC.1	Epithelial cells	0.115843	non-Active	0.0487212	non-Active
P1_ACGGAGATCATTATCC.1	Macrophages	0.212006	non-Active	0.0853238	non-Active
P1_ACGGAGATCCATTCTA.1	CD8+ T-cells	0.107026	non-Active	0.0406891	non-Active
P1_ACGGAGATCGGAATCT.1	Epithelial cells	0.143333	non-Active	0.145107	non-Active
P1_ACGGCCAAGGCTCTTA.1	Mast	0.144362	non-Active	0.0360037	non-Active
P1_ACGGCCACAACAACCT.1	Epithelial cells	0.141813	non-Active	0.0412527	non-Active
P1_ACGGCCACACAACGCC.1	Fibroblasts	0.207306	non-Active	0.214754	Metabolism-Active
P1_ACGGCCACATGCCTTC.1	Epithelial cells	0.0853475	non-Active	0	non-Active
P1_ACGGCCAGTACCGAGA.1	CD8+ T-cells	0.0728593	non-Active	0.0986402	non-Active
P1_ACGGCCAGTTAAAGAC.1	Epithelial cells	0.140001	non-Active	0.0859931	non-Active
P1_ACGGCCATCGGGAGTA.1	Epithelial cells	0.125209	non-Active	0.0792292	non-Active
P1_ACGGGCTAGTACGATA.1	Epithelial cells	0.0889606	non-Active	0.0169802	non-Active
P1_ACGGGCTTCCGCAAGC.1	CD8+ T-cells	0.0751394	non-Active	0.0415698	non-Active
P1_ACGGGTCCACGACTCG.1	Epithelial cells	0.110827	non-Active	0.0934616	non-Active
P1_ACGGGTCCACTCGACG.1	Epithelial cells	0.0889255	non-Active	0.0907842	non-Active
P1_ACGGGTCGTATGAAAC.1	Epithelial cells	0.121537	non-Active	0.0628127	non-Active
P1_ACGGGTCGTCTAAACC.1	Epithelial cells	0.198945	non-Active	0.116466	non-Active
P1_ACGGGTCTCGAGCCCA.1	Epithelial cells	0.19649	non-Active	0	non-Active
P1_ACGTCAAAGTGAAGTT.1	CD8+ T-cells	0.0571789	non-Active	0	non-Active
P1_ACGTCAACACACATGT.1	Epithelial cells	0.120859	non-Active	0.0608046	non-Active
P1_ACGTCAACACCGCTAG.1	Epithelial cells	0.130529	non-Active	0.0659128	non-Active
P1_ACGTCAATCCAGATCA.1	Epithelial cells	0.073748	non-Active	0.0237793	non-Active
P1_ACGTCAATCCTCTAGC.1	Epithelial cells	0.132505	non-Active	0.0348059	non-Active
P1_ACGTCAATCTATGTGG.1	Epithelial cells	0.210264	non-Active	0.0854999	non-Active
P1_ACTATCTAGTATCGAA.1	Epithelial cells	0.105179	non-Active	0.0131755	non-Active
P1_ACTATCTAGTTACGGG.1	Epithelial cells	0.118345	non-Active	0.071796	non-Active
P1_ACTATCTCAATGACCT.1	Epithelial cells	0.126998	non-Active	0	non-Active
P1_ACTATCTCAGGATCGA.1	Monocytes	0.164451	non-Active	0.133129	non-Active
P1_ACTATCTGTCCGAGTC.1	Monocytes	0.159025	non-Active	0.03005	non-Active
P1_ACTATCTGTCGGCACT.1	Epithelial cells	0.223793	non-Active	0.0901853	non-Active
P1_ACTATCTGTTCCATGA.1	Epithelial cells	0.0809158	non-Active	0.0298034	non-Active
P1_ACTATCTTCAATCTCT.1	Myofibroblasts	0.252698	non-Active	0.157754	non-Active
P1_ACTATCTTCCGCTGTT.1	Epithelial cells	0.15609	non-Active	0.0416755	non-Active
P1_ACTATCTTCGCCAAAT.1	Macrophages	0.248606	non-Active	0.148911	non-Active
P1_ACTATCTTCGTTGCCT.1	B-cells	0.158733	non-Active	0	non-Active
P1_ACTGAACAGGTGCTTT.1	Epithelial cells	0.125969	non-Active	0.0931797	non-Active
P1_ACTGAACAGTACATGA.1	Epithelial cells	0.108418	non-Active	0.0567533	non-Active
P1_ACTGAACGTGTGAAAT.1	Epithelial cells	0.121923	non-Active	0.0019728	non-Active
P1_ACTGAACTCCCATTTA.1	Epithelial cells	0.111177	non-Active	0.0841964	non-Active
P1_ACTGAACTCCTTCAAT.1	Epithelial cells	0.174764	non-Active	0.0213486	non-Active
P1_ACTGAACTCTACCAGA.1	Epithelial cells	0.132669	non-Active	0.0504826	non-Active
P1_ACTGAACTCTGCAGTA.1	CD8+ T-cells	0.1152	non-Active	0.0582329	non-Active
P1_ACTGAGTAGTAATCCC.1	CD8+ T-cells	0.0849148	non-Active	0.0542169	non-Active
P1_ACTGAGTCACTGTCGG.1	Epithelial cells	0.122987	non-Active	0.0844078	non-Active
P1_ACTGAGTGTCCGAACC.1	Epithelial cells	0.198103	non-Active	0.0728176	non-Active
P1_ACTGAGTGTGGTAACG.1	Epithelial cells	0.0817226	non-Active	0	non-Active
P1_ACTGAGTGTTTACTCT.1	Epithelial cells	0.124238	non-Active	0.0130346	non-Active
P1_ACTGAGTTCAACGGCC.1	Epithelial cells	0.200711	non-Active	0	non-Active
P1_ACTGAGTTCACTTCAT.1	Epithelial cells	0.149273	non-Active	0.0692947	non-Active
P1_ACTGAGTTCTGCTGCT.1	Epithelial cells	0.0970405	non-Active	0.019728	non-Active
P1_ACTGATGAGAGAACAG.1	B-cells	0.134026	non-Active	0.0339956	non-Active
P1_ACTGATGCAAGTTAAG.1	Epithelial cells	0.134809	non-Active	0.094448	non-Active
P1_ACTGATGCACATCTTT.1	CD8+ T-cells	0.124601	non-Active	0.071655	non-Active
P1_ACTGATGTCCGAACGC.1	Epithelial cells	0.145871	non-Active	0.122983	non-Active
P1_ACTGCTCAGATCTGAA.1	Endothelial cells	0.14939	non-Active	0.0288875	non-Active
P1_ACTGCTCAGCAACGGT.1	Epithelial cells	0.182856	non-Active	0.0683435	non-Active
P1_ACTGCTCAGGGTCGAT.1	Epithelial cells	0.103004	non-Active	0.0662298	non-Active
P1_ACTGCTCCAAGCCGTC.1	Epithelial cells	0.0913343	non-Active	0.0614387	non-Active
P1_ACTGCTCGTACATCCA.1	Epithelial cells	0.108921	non-Active	0.0361446	non-Active
P1_ACTGCTCGTAGCGCTC.1	B-cells	0.138866	non-Active	0.0341718	non-Active
P1_ACTGCTCGTCTAGCGC.1	Epithelial cells	0.115866	non-Active	0.0294159	non-Active
P1_ACTGCTCTCGGCGCTA.1	Epithelial cells	0.10146	non-Active	0.0343831	non-Active
P1_ACTGCTCTCGTAGGTT.1	CD8+ T-cells	0.152033	non-Active	0.0990981	non-Active
P1_ACTGTCCCAAACCTAC.1	Epithelial cells	0.0678781	non-Active	0.0305432	non-Active
P1_ACTGTCCCATGGTAGG.1	Epithelial cells	0.112487	non-Active	0.0447404	non-Active
P1_ACTGTCCTCGAGGTAG.1	CD8+ T-cells	0.110616	non-Active	0.101106	non-Active
P1_ACTGTCCTCGGCATCG.1	CD8+ T-cells	0.131652	non-Active	0.0407243	non-Active
P1_ACTGTCCTCGGTTCGG.1	Epithelial cells	0.138212	non-Active	0.0601	non-Active
P1_ACTTACTAGCTAAACA.1	Epithelial cells	0.0681938	non-Active	0.0211372	non-Active
P1_ACTTACTAGGACACCA.1	Epithelial cells	0.109143	non-Active	0	non-Active
P1_ACTTACTAGTGGTCCC.1	Epithelial cells	0.0781562	non-Active	0.0191644	non-Active
P1_ACTTACTTCAACACAC.1	Epithelial cells	0.113001	non-Active	0.0114493	non-Active
P1_ACTTACTTCGCTTAGA.1	Epithelial cells	0.100174	non-Active	0.0348763	non-Active
P1_ACTTGTTAGAAGGTTT.1	Epithelial cells	0.0997299	non-Active	0.0758825	non-Active
P1_ACTTGTTAGAGTACCG.1	Epithelial cells	0.130389	non-Active	0.0409004	non-Active
P1_ACTTGTTAGATACACA.1	CD8+ T-cells	0.0841782	non-Active	0.0480871	non-Active
P1_ACTTGTTAGCGTCAAG.1	Epithelial cells	0.117363	non-Active	0.0332558	non-Active
P1_ACTTGTTAGGCGTACA.1	Epithelial cells	0.118404	non-Active	0.0411118	non-Active
P1_ACTTGTTAGTACGTAA.1	Epithelial cells	0.0920943	non-Active	0.0613331	non-Active
P1_ACTTGTTCACACAGAG.1	Epithelial cells	0.167503	non-Active	0.0523497	non-Active
P1_ACTTGTTCACTAGTAC.1	Epithelial cells	0.103203	non-Active	0	non-Active
P1_ACTTGTTCAGTCTTCC.1	Epithelial cells	0.129559	non-Active	0.0298034	non-Active
P1_ACTTGTTGTAAATGAC.1	Epithelial cells	0.136925	non-Active	0.0348763	non-Active
P1_ACTTGTTGTATGCTTG.1	Epithelial cells	0.271571	OS-Active	0.118509	non-Active
P1_ACTTGTTGTCACTGGC.1	Epithelial cells	0.108009	non-Active	0.0454097	non-Active
P1_ACTTGTTGTCTAACGT.1	Epithelial cells	0.134131	non-Active	0.0335024	non-Active
P1_ACTTGTTGTTCGTCTC.1	Epithelial cells	0.199787	non-Active	0.0391038	non-Active
P1_ACTTGTTTCACTCCTG.1	Epithelial cells	0.168029	non-Active	0.0501656	non-Active
P1_ACTTGTTTCCGAGCCA.1	Epithelial cells	0.15574	non-Active	0.0189178	non-Active
P1_ACTTGTTTCTTGTTTG.1	Epithelial cells	0.126051	non-Active	0.0516452	non-Active
P1_ACTTTCACACAACGCC.1	Epithelial cells	0.131102	non-Active	0.0635525	non-Active
P1_ACTTTCAGTAACGTTC.1	Epithelial cells	0.156874	non-Active	0.108117	non-Active
P1_ACTTTCAGTCCCTTGT.1	Epithelial cells	0.129711	non-Active	0.0376242	non-Active
P1_ACTTTCATCAGAGCTT.1	Epithelial cells	0.109716	non-Active	0.0640457	non-Active
P1_ACTTTCATCCTTGCCA.1	Fibroblasts	0.262357	OS-Active	0.290002	Metabolism-Active
P1_ACTTTCATCGTGTAGT.1	CD8+ T-cells	0.0598683	non-Active	0.0381526	non-Active
P1_AGAATAGAGAGGGCTT.1	Epithelial cells	0.0894634	non-Active	0.01078	non-Active
P1_AGAATAGAGAGGTTAT.1	Monocytes	0.181394	non-Active	0.0572113	non-Active
P1_AGAATAGCATATACGC.1	Epithelial cells	0.119035	non-Active	0.0601353	non-Active
P1_AGAATAGGTGGTTTCA.1	Fibroblasts	0.192678	non-Active	0.139188	non-Active
P1_AGAATAGTCAGAGACG.1	Epithelial cells	0.0825879	non-Active	0.0371662	non-Active
P1_AGACGTTAGCTACCTA.1	Myofibroblasts	0.247998	non-Active	0.160678	non-Active
P1_AGACGTTAGGTAAACT.1	Epithelial cells	0.129044	non-Active	0.045304	non-Active
P1_AGACGTTAGTCAATAG.1	Epithelial cells	0.0872768	non-Active	0.0799338	non-Active
P1_AGACGTTGTGAGGGAG.1	CD8+ T-cells	0.11672	non-Active	0.049919	non-Active
P1_AGACGTTGTTGTACAC.1	Epithelial cells	0.100361	non-Active	0.0419221	non-Active
P1_AGACGTTGTTTCCACC.1	Epithelial cells	0.12798	non-Active	0.0277249	non-Active
P1_AGACGTTTCACGCGGT.1	Monocytes	0.187311	non-Active	0.105122	non-Active
P1_AGACGTTTCATCGATG.1	Epithelial cells	0.024111	non-Active	0.0102515	non-Active
P1_AGACGTTTCGGTTAAC.1	Epithelial cells	0.101063	non-Active	0.0585148	non-Active
P1_AGAGCGAAGCGCCTTG.1	Epithelial cells	0.153237	non-Active	0.0771507	non-Active
P1_AGAGCGACAATGAAAC.1	B-cells	0.0905041	non-Active	0.0930036	non-Active
P1_AGAGCGACATCTGGTA.1	Epithelial cells	0.0681353	non-Active	0.0913831	non-Active
P1_AGAGCGACATTTGCCC.1	CD8+ T-cells	0.0952865	non-Active	0.0390333	non-Active
P1_AGAGCGAGTACTCTCC.1	Epithelial cells	0.0741806	non-Active	0	non-Active
P1_AGAGCGAGTAGGCATG.1	CD8+ T-cells	0.133149	non-Active	0.0715141	non-Active
P1_AGAGCGAGTGGAAAGA.1	Epithelial cells	0.113282	non-Active	0.0055309	non-Active
P1_AGAGCTTAGTGCCATT.1	CD8+ T-cells	0.0981981	non-Active	0	non-Active
P1_AGAGCTTAGTGTACGG.1	Epithelial cells	0.0825061	non-Active	0.0544635	non-Active
P1_AGAGCTTCATTATCTC.1	Fibroblasts	0.206405	non-Active	0.23723	Metabolism-Active
P1_AGAGCTTGTCGGCTCA.1	Endothelial cells	0.190936	non-Active	0.129712	non-Active
P1_AGAGCTTGTGCGAAAC.1	CD8+ T-cells	0.089861	non-Active	0.00905376	non-Active
P1_AGAGCTTTCTGCTGTC.1	Epithelial cells	0.150536	non-Active	0.0357571	non-Active
P1_AGAGTGGAGCGGATCA.1	Epithelial cells	0.121175	non-Active	0.0865568	non-Active
P1_AGAGTGGCACGGACAA.1	CD8+ T-cells	0.106278	non-Active	0.0396674	non-Active
P1_AGAGTGGCATCACCCT.1	Macrophages	0.278376	OS-Active	0.0439653	non-Active
P1_AGAGTGGGTCATACTG.1	Epithelial cells	0.125127	non-Active	0.0598887	non-Active
P1_AGAGTGGGTCTTCGTC.1	Epithelial cells	0.126799	non-Active	0.0820123	non-Active
P1_AGAGTGGTCAACGAAA.1	Epithelial cells	0.177477	non-Active	0	non-Active
P1_AGAGTGGTCTGAGTGT.1	CD8+ T-cells	0.0623005	non-Active	0.0191291	non-Active
P1_AGAGTGGTCTTGTATC.1	B-cells	0.127033	non-Active	0.0205383	non-Active
P1_AGATCTGAGTAGGCCA.1	CD8+ T-cells	0.0946902	non-Active	0.0489326	non-Active
P1_AGATCTGCAGTCAGCC.1	Epithelial cells	0.146946	non-Active	0.092299	non-Active
P1_AGATCTGCATAGAAAC.1	Epithelial cells	0.119	non-Active	0.0137392	non-Active
P1_AGATCTGGTACAGCAG.1	Epithelial cells	0.182692	non-Active	0.102093	non-Active
P1_AGATCTGGTCGGGTCT.1	B-cells	0.0903872	non-Active	0.0639752	non-Active
P1_AGATCTGGTCTCTTTA.1	Endothelial cells	0.276493	OS-Active	0.13792	non-Active
P1_AGATCTGGTGCACCAC.1	CD8+ T-cells	0.0835233	non-Active	0.0677447	non-Active
P1_AGATCTGGTGGTTTCA.1	Epithelial cells	0.105647	non-Active	0.0262101	non-Active
P1_AGATCTGGTTTCGCTC.1	Epithelial cells	0.124753	non-Active	0.0738392	non-Active
P1_AGATCTGTCCTGCTTG.1	CD8+ T-cells	0.0934858	non-Active	0.0330092	non-Active
P1_AGATCTGTCGGGAGTA.1	Monocytes	0.17971	non-Active	0.0103924	non-Active
P1_AGATCTGTCTTTCCTC.1	Epithelial cells	0.2371	non-Active	0.0889875	non-Active
P1_AGATTGCAGAGCTATA.1	B-cells	0.131535	non-Active	0.0660185	non-Active
P1_AGATTGCAGCTAACTC.1	Epithelial cells	0.20492	non-Active	0.0177905	non-Active
P1_AGATTGCAGTTGCAGG.1	Epithelial cells	0.109166	non-Active	0.0803213	non-Active
P1_AGATTGCCACAGACAG.1	Epithelial cells	0.114089	non-Active	0.0521031	non-Active
P1_AGATTGCCATCATCCC.1	Endothelial cells	0.22785	non-Active	0.219122	Metabolism-Active
P1_AGATTGCCATCCGCGA.1	CD8+ T-cells	0.123689	non-Active	0.10086	non-Active
P1_AGATTGCGTAGCTGCC.1	CD8+ T-cells	0.102817	non-Active	0.0626365	non-Active
P1_AGATTGCGTCCGAACC.1	Epithelial cells	0.106103	non-Active	0.0559078	non-Active
P1_AGATTGCTCAATCACG.1	Epithelial cells	0.0469826	non-Active	0.0588318	non-Active
P1_AGATTGCTCAGCTCGG.1	Epithelial cells	0.115667	non-Active	0.0819418	non-Active
P1_AGATTGCTCCCGACTT.1	Fibroblasts	0.197437	non-Active	0.0780314	non-Active
P1_AGATTGCTCCTTCAAT.1	Epithelial cells	0.106792	non-Active	0.0537237	non-Active
P1_AGATTGCTCTCGCTTG.1	Epithelial cells	0.0938834	non-Active	0.0596068	non-Active
P1_AGATTGCTCTGATTCT.1	Fibroblasts	0.265713	OS-Active	0.214261	Metabolism-Active
P1_AGCAGCCAGGAGCGTT.1	Epithelial cells	0.0999754	non-Active	0	non-Active
P1_AGCAGCCAGTTAGCGG.1	Myofibroblasts	0.219841	non-Active	0.125484	non-Active
P1_AGCAGCCCAAACTGTC.1	Epithelial cells	0.097099	non-Active	0.0678503	non-Active
P1_AGCAGCCCAACGCACC.1	Epithelial cells	0.181838	non-Active	0.00186712	non-Active
P1_AGCAGCCCAGATGGCA.1	Epithelial cells	0.0904573	non-Active	0.0668639	non-Active
P1_AGCAGCCCAGGTCCAC.1	CD8+ T-cells	0.149589	non-Active	0.0542169	non-Active
P1_AGCAGCCGTAAGCACG.1	Monocytes	0.155319	non-Active	0.097689	non-Active
P1_AGCAGCCGTTGCGTTA.1	Epithelial cells	0.135698	non-Active	0	non-Active
P1_AGCAGCCTCAGTCAGT.1	Epithelial cells	0.184575	non-Active	0.0522793	non-Active
P1_AGCAGCCTCATACGGT.1	Fibroblasts	0.174706	non-Active	0.125907	non-Active
P1_AGCAGCCTCCACTGGG.1	Epithelial cells	0.211457	non-Active	0.0481928	non-Active
P1_AGCAGCCTCCAGGGCT.1	Epithelial cells	0.165515	non-Active	0.0239555	non-Active
P1_AGCAGCCTCGTAGGTT.1	Epithelial cells	0.160931	non-Active	0.0181075	non-Active
P1_AGCATACAGACCGGAT.1	Epithelial cells	0.12805	non-Active	0.097231	non-Active
P1_AGCATACAGGAGCGAG.1	Endothelial cells	0.119912	non-Active	0.0924399	non-Active
P1_AGCATACAGGCATTGG.1	Epithelial cells	0.15588	non-Active	0.0434721	non-Active
P1_AGCATACAGTTAGCGG.1	Epithelial cells	0.153366	non-Active	0.0444233	non-Active
P1_AGCATACCAGTATCTG.1	Monocytes	0.113469	non-Active	0.0568942	non-Active
P1_AGCATACCATCAGTCA.1	Epithelial cells	0.224764	non-Active	0.058092	non-Active
P1_AGCATACGTAAGTGTA.1	Epithelial cells	0.244899	non-Active	0.0194814	non-Active
P1_AGCATACGTGGTCCGT.1	Endothelial cells	0.144818	non-Active	0.212112	Metabolism-Active
P1_AGCATACGTTGACGTT.1	Epithelial cells	0.111411	non-Active	0.0729233	non-Active
P1_AGCATACGTTGATTGC.1	Epithelial cells	0.181113	non-Active	0.0945184	non-Active
P1_AGCATACTCAATCACG.1	Epithelial cells	0.0995077	non-Active	0.0698232	non-Active
P1_AGCCTAAAGCTACCTA.1	Epithelial cells	0.139229	non-Active	0.0646798	non-Active
P1_AGCCTAAAGGGCATGT.1	Epithelial cells	0.102677	non-Active	0.0715846	non-Active
P1_AGCCTAAAGTCCAGGA.1	CD8+ T-cells	0.0592018	non-Active	0.0267033	non-Active
P1_AGCCTAAAGTGGTAAT.1	Epithelial cells	0.133149	non-Active	0.0313183	non-Active
P1_AGCCTAACAATAGAGT.1	Epithelial cells	0.0785772	non-Active	0	non-Active
P1_AGCCTAACACATCCGG.1	CD8+ T-cells	0.0669543	non-Active	0.0394913	non-Active
P1_AGCCTAACACCACGTG.1	CD8+ T-cells	0.146268	non-Active	0.0364616	non-Active
P1_AGCCTAACATCAGTAC.1	Macrophages	0.180014	non-Active	0.148136	non-Active
P1_AGCCTAACATGTTCCC.1	Epithelial cells	0.0871248	non-Active	0.0577045	non-Active
P1_AGCCTAAGTGGGTCAA.1	Myofibroblasts	0.231557	non-Active	0.149722	non-Active
P1_AGCCTAATCACGCGGT.1	Epithelial cells	0.119971	non-Active	0.0553794	non-Active
P1_AGCCTAATCATCATTC.1	Epithelial cells	0.106933	non-Active	0.054076	non-Active
P1_AGCCTAATCGAGAGCA.1	Macrophages	0.250289	non-Active	0.0430494	non-Active
P1_AGCCTAATCTTCCTTC.1	Epithelial cells	0.108453	non-Active	0.0643627	non-Active
P1_AGCGGTCAGATCCCAT.1	Epithelial cells	0.112569	non-Active	0.0436835	non-Active
P1_AGCGGTCAGCTGATAA.1	B-cells	0.187942	non-Active	0.0140562	non-Active
P1_AGCGGTCAGGAGTACC.1	Epithelial cells	0.099765	non-Active	0.0257521	non-Active
P1_AGCGGTCAGGCTCAGA.1	Epithelial cells	0.225792	non-Active	0.0367787	non-Active
P1_AGCGGTCAGGGAGTAA.1	Epithelial cells	0.127548	non-Active	0.0311773	non-Active
P1_AGCGGTCAGTGAAGAG.1	CD8+ T-cells	0.145146	non-Active	0.0454097	non-Active
P1_AGCGGTCCAAAGCAAT.1	Mast	0.153003	non-Active	0.0552385	non-Active
P1_AGCGGTCTCACATACG.1	Epithelial cells	0.132938	non-Active	0.0792292	non-Active
P1_AGCGGTCTCACCCTCA.1	Epithelial cells	0.124297	non-Active	0.0304375	non-Active
P1_AGCGTATAGCCCAGCT.1	Monocytes	0.187977	non-Active	0.00644684	non-Active
P1_AGCGTATCACTTCTGC.1	Epithelial cells	0.121584	non-Active	0	non-Active
P1_AGCGTATGTGACGGTA.1	Macrophages	0.228868	non-Active	0.142782	non-Active
P1_AGCGTATTCAGCGATT.1	Epithelial cells	0.149753	non-Active	0.0432608	non-Active
P1_AGCGTCGAGACTAAGT.1	CD8+ T-cells	0.138983	non-Active	0.100472	non-Active
P1_AGCGTCGGTACCGTAT.1	Epithelial cells	0.142749	non-Active	0.049919	non-Active
P1_AGCGTCGTCGGTGTCG.1	Epithelial cells	0.154629	non-Active	0.0268442	non-Active
P1_AGCTCCTAGACCACGA.1	Epithelial cells	0.104278	non-Active	0.0486155	non-Active
P1_AGCTCCTAGAGACGAA.1	Epithelial cells	0.202874	non-Active	0.0878602	non-Active
P1_AGCTCCTAGGCTCTTA.1	Epithelial cells	0.18862	non-Active	0.0721835	non-Active
P1_AGCTCCTAGTACGACG.1	CD8+ T-cells	0.135698	non-Active	0.101952	non-Active
P1_AGCTCCTCAACTGGCC.1	Myofibroblasts	0.273278	OS-Active	0.214789	Metabolism-Active
P1_AGCTCCTTCACCTTAT.1	CD8+ T-cells	0.0996013	non-Active	0.130205	non-Active
P1_AGCTCCTTCTGAAAGA.1	Epithelial cells	0.117831	non-Active	0.0180018	non-Active
P1_AGCTCCTTCTGATTCT.1	Endothelial cells	0.247109	non-Active	0.157683	non-Active
P1_AGCTCTCAGCAATATG.1	Epithelial cells	0.0988412	non-Active	0.059783	non-Active
P1_AGCTCTCCAAGGTGTG.1	Fibroblasts	0.241753	non-Active	0.233495	Metabolism-Active
P1_AGCTCTCCACGGTGTC.1	Epithelial cells	0.106828	non-Active	0.105933	non-Active
P1_AGCTCTCCATGGTTGT.1	Macrophages	0.193461	non-Active	0.075495	non-Active
P1_AGCTCTCGTGGTAACG.1	Epithelial cells	0.1248	non-Active	0.0739449	non-Active
P1_AGCTCTCTCCAAATGC.1	Epithelial cells	0.0741689	non-Active	0.0146199	non-Active
P1_AGCTCTCTCCCACTTG.1	Epithelial cells	0.0692111	non-Active	0.0084901	non-Active
P1_AGCTCTCTCGTGGACC.1	CD8+ T-cells	0.130763	non-Active	0.033432	non-Active
P1_AGCTCTCTCTTGTACT.1	Epithelial cells	0.128144	non-Active	0.0921933	non-Active
P1_AGCTTGAAGCGTTCCG.1	Epithelial cells	0.123794	non-Active	0.0544987	non-Active
P1_AGCTTGAAGTGCGTGA.1	Epithelial cells	0.0985957	non-Active	0.0855704	non-Active
P1_AGCTTGAGTCCCGACA.1	CD8+ T-cells	0.112651	non-Active	0.0621785	non-Active
P1_AGCTTGAGTGAGGCTA.1	Epithelial cells	0.0850201	non-Active	0.0782076	non-Active
P1_AGCTTGAGTTCCGGCA.1	Epithelial cells	0.219209	non-Active	0.0271613	non-Active
P1_AGCTTGAGTTCTGTTT.1	Fibroblasts	0.213141	non-Active	0.247693	Metabolism-Active
P1_AGCTTGATCCTCAATT.1	Myofibroblasts	0.172893	non-Active	0.101846	non-Active
P1_AGCTTGATCTTTCCTC.1	Epithelial cells	0.085862	non-Active	0.0339604	non-Active
P1_AGGCCACCAAGTTGTC.1	Fibroblasts	0.161013	non-Active	0.20644	Metabolism-Active
P1_AGGCCACCATGTAAGA.1	CD8+ T-cells	0.0997884	non-Active	0.0193053	non-Active
P1_AGGCCACGTCCCTTGT.1	Epithelial cells	0.137288	non-Active	0.0475234	non-Active
P1_AGGCCACGTCCGAATT.1	Epithelial cells	0.117971	non-Active	0.0385401	non-Active
P1_AGGCCACGTCGTGGCT.1	Epithelial cells	0.0813484	non-Active	0.0735574	non-Active
P1_AGGCCACGTTCGCTAA.1	CD8+ T-cells	0.137054	non-Active	0.0815895	non-Active
P1_AGGCCACTCGTCGTTC.1	Epithelial cells	0.120812	non-Active	0.0598182	non-Active
P1_AGGCCACTCGTGGACC.1	Epithelial cells	0.232949	non-Active	0.0877545	non-Active
P1_AGGCCGTAGAGTAATC.1	Epithelial cells	0.12176	non-Active	0.0563658	non-Active
P1_AGGCCGTAGCCTTGAT.1	Epithelial cells	0.086049	non-Active	0.0163461	non-Active
P1_AGGCCGTAGGTGCTAG.1	B-cells	0.0879433	non-Active	0.0396322	non-Active
P1_AGGCCGTGTACCGCTG.1	CD8+ T-cells	0.138399	non-Active	0.0640809	non-Active
P1_AGGCCGTTCAGGCAAG.1	Epithelial cells	0.154722	non-Active	0.0819418	non-Active
P1_AGGCCGTTCGTTACGA.1	Epithelial cells	0.0737714	non-Active	0	non-Active
P1_AGGGAGTAGATCACGG.1	Epithelial cells	0.121631	non-Active	0.0535828	non-Active
P1_AGGGAGTAGCGGATCA.1	Epithelial cells	0.105705	non-Active	0.0108504	non-Active
P1_AGGGAGTAGGCTAGGT.1	Macrophages	0.171864	non-Active	0.0811315	non-Active
P1_AGGGAGTAGTCCCACG.1	Epithelial cells	0.0948071	non-Active	0.0403368	non-Active
P1_AGGGAGTCACGGCTAC.1	Endothelial cells	0.149145	non-Active	0.0913478	non-Active
P1_AGGGAGTGTAGAAAGG.1	Epithelial cells	0.143883	non-Active	0.0395265	non-Active
P1_AGGGAGTGTAGCGCTC.1	Fibroblasts	0.186317	non-Active	0.313711	Metabolism-Active
P1_AGGGAGTGTGGAAAGA.1	Macrophages	0.251295	non-Active	0.172233	non-Active
P1_AGGGAGTGTTACGTCA.1	Epithelial cells	0.148466	non-Active	0.0931445	non-Active
P1_AGGGAGTTCACGACTA.1	Endothelial cells	0.245402	non-Active	0.128902	non-Active
P1_AGGGAGTTCAGTCCCT.1	CD8+ T-cells	0.0952164	non-Active	0.042838	non-Active
P1_AGGGAGTTCTGTTGAG.1	Epithelial cells	0.195227	non-Active	0.0352286	non-Active
P1_AGGGATGAGCCTCGTG.1	Endothelial cells	0.189836	non-Active	0.0959628	non-Active
P1_AGGGATGAGGTGACCA.1	Epithelial cells	0.187182	non-Active	0.046537	non-Active
P1_AGGGATGCAAAGGAAG.1	CD8+ T-cells	0.120801	non-Active	0.0370958	non-Active
P1_AGGGATGCACATCCGG.1	Epithelial cells	0.160814	non-Active	0.0585852	non-Active
P1_AGGGATGCAGGTCGTC.1	Epithelial cells	0.175337	non-Active	0.0269147	non-Active
P1_AGGGATGCATGCCCGA.1	Epithelial cells	0.0840378	non-Active	0.00764461	non-Active
P1_AGGGATGGTAAGTAGT.1	Monocytes	0.149846	non-Active	0.0258578	non-Active
P1_AGGGATGGTGATGTGG.1	Epithelial cells	0.114323	non-Active	0.043296	non-Active
P1_AGGGATGTCAACGGGA.1	CD8+ T-cells	0.0919306	non-Active	0.0292045	non-Active
P1_AGGGTGAAGGAGCGAG.1	B-cells	0.153576	non-Active	0.080427	non-Active
P1_AGGGTGACATTGTGCA.1	Epithelial cells	0.155669	non-Active	0.0479814	non-Active
P1_AGGGTGAGTAGGGACT.1	Epithelial cells	0.125829	non-Active	0.0380469	non-Active
P1_AGGGTGAGTCGGCATC.1	Epithelial cells	0.153483	non-Active	0.0912422	non-Active
P1_AGGGTGATCAACTCTT.1	Epithelial cells	0.12473	non-Active	0.0553794	non-Active
P1_AGGGTGATCGGTCTAA.1	Epithelial cells	0.119725	non-Active	0.107905	non-Active
P1_AGGTCATAGAATTCCC.1	Epithelial cells	0.154792	non-Active	0.0691538	non-Active
P1_AGGTCATAGAGGACGG.1	Epithelial cells	0.136703	non-Active	0.0109209	non-Active
P1_AGGTCATAGCGTTGCC.1	CD8+ T-cells	0.0989582	non-Active	0.0002466	non-Active
P1_AGGTCATCAAGGCTCC.1	CD8+ T-cells	0.130389	non-Active	0.0512577	non-Active
P1_AGGTCATCAGCTTCGG.1	Epithelial cells	0.166439	non-Active	0.0014796	non-Active
P1_AGGTCATCAGGACCCT.1	Epithelial cells	0.115352	non-Active	0.0845487	non-Active
P1_AGGTCATGTGTGACCC.1	B-cells	0.150548	non-Active	0.0361446	non-Active
P1_AGGTCATGTTGTCGCG.1	Epithelial cells	0.111481	non-Active	0	non-Active
P1_AGGTCATTCAATCACG.1	CD8+ T-cells	0.120941	non-Active	0.0781371	non-Active
P1_AGGTCATTCTGCAAGT.1	CD8+ T-cells	0.147192	non-Active	0.0761643	non-Active
P1_AGGTCCGAGCAGGTCA.1	Epithelial cells	0.147274	non-Active	0.00405129	non-Active
P1_AGGTCCGCACAGGTTT.1	Epithelial cells	0.10332	non-Active	0.0595364	non-Active
P1_AGGTCCGCACGTAAGG.1	Epithelial cells	0.10111	non-Active	0.0785599	non-Active
P1_AGGTCCGGTTTGGGCC.1	Epithelial cells	0.176226	non-Active	0.0445642	non-Active
P1_AGGTCCGTCAATACCG.1	Epithelial cells	0.180576	non-Active	0.123758	non-Active
P1_AGGTCCGTCCTGCAGG.1	Epithelial cells	0.193859	non-Active	0.0671458	non-Active
P1_AGTAGTCAGTTTAGGA.1	Epithelial cells	0.106243	non-Active	0	non-Active
P1_AGTAGTCCAAACTGTC.1	CD8+ T-cells	0.152617	non-Active	0.055626	non-Active
P1_AGTAGTCGTAAGTAGT.1	Epithelial cells	0.111166	non-Active	0.0169802	non-Active
P1_AGTAGTCTCAACTCTT.1	Epithelial cells	0.138878	non-Active	0.0463609	non-Active
P1_AGTAGTCTCGCCTGAG.1	Endothelial cells	0.154956	non-Active	0.0411823	non-Active
P1_AGTAGTCTCTGTCCGT.1	Epithelial cells	0.146549	non-Active	0.0436835	non-Active
P1_AGTCTTTAGACTGGGT.1	Epithelial cells	0.152992	non-Active	0.0578806	non-Active
P1_AGTCTTTCAATCCAAC.1	Epithelial cells	0.137884	non-Active	0.0907137	non-Active
P1_AGTCTTTGTCCCGACA.1	Epithelial cells	0.172075	non-Active	0.00155006	non-Active
P1_AGTCTTTGTGAAAGAG.1	Epithelial cells	0.124566	non-Active	0.0360741	non-Active
P1_AGTCTTTTCCTGTACC.1	Epithelial cells	0.107167	non-Active	0.0399493	non-Active
P1_AGTGAGGAGCGTCTAT.1	Epithelial cells	0.11437	non-Active	0	non-Active
P1_AGTGAGGAGCTGTCTA.1	Endothelial cells	0.158558	non-Active	0.0557669	non-Active
P1_AGTGAGGCACCTCGGA.1	Epithelial cells	0.0677494	non-Active	0	non-Active
P1_AGTGAGGCAGTCAGAG.1	Epithelial cells	0.108277	non-Active	0.0207497	non-Active
P1_AGTGAGGGTTAAGGGC.1	Fibroblasts	0.261924	OS-Active	0.235081	Metabolism-Active
P1_AGTGAGGGTTATCCGA.1	Epithelial cells	0.156406	non-Active	0.0391742	non-Active
P1_AGTGAGGTCCGTAGTA.1	CD8+ T-cells	0.104243	non-Active	0.0327626	non-Active
P1_AGTGAGGTCCTTTCGG.1	Epithelial cells	0.183534	non-Active	0.0606285	non-Active
P1_AGTGAGGTCGCCAAAT.1	Epithelial cells	0.107903	non-Active	0.0357571	non-Active
P1_AGTGGGAAGGGAAACA.1	Epithelial cells	0.181336	non-Active	0.118861	non-Active
P1_AGTGGGACAAAGTCAA.1	Macrophages	0.222706	non-Active	0.0179314	non-Active
P1_AGTGGGAGTAGCCTAT.1	Epithelial cells	0.163796	non-Active	0.00708096	non-Active
P1_AGTGGGAGTATAAACG.1	Epithelial cells	0.114311	non-Active	0.020961	non-Active
P1_AGTGGGAGTCCTCCAT.1	Epithelial cells	0.111493	non-Active	0.0172268	non-Active
P1_AGTGGGAGTCTGCCAG.1	Epithelial cells	0.110897	non-Active	0.057775	non-Active
P1_AGTGGGATCAAAGTAG.1	CD8+ T-cells	0.117866	non-Active	0.154548	non-Active
P1_AGTGTCAAGAATGTTG.1	Epithelial cells	0.144234	non-Active	0.0466779	non-Active
P1_AGTGTCACAAGGACTG.1	CD8+ T-cells	0.0506425	non-Active	0.107835	non-Active
P1_AGTGTCACAATGAATG.1	Epithelial cells	0.11085	non-Active	0.0146199	non-Active
P1_AGTGTCACACACTGCG.1	Epithelial cells	0.0780978	non-Active	0.0438244	non-Active
P1_AGTGTCACAGGACGTA.1	Epithelial cells	0.233101	non-Active	0.121151	non-Active
P1_AGTGTCAGTAAGAGAG.1	Epithelial cells	0.145356	non-Active	0.115585	non-Active
P1_AGTGTCAGTCGGCACT.1	CD8+ T-cells	0.14849	non-Active	0.0396674	non-Active
P1_AGTGTCAGTCTAGAGG.1	Macrophages	0.312847	OS-Active	0.269323	Metabolism-Active
P1_AGTGTCAGTTCAGACT.1	Epithelial cells	0.122274	non-Active	0.0735574	non-Active
P1_AGTGTCATCTACTATC.1	Epithelial cells	0.138118	non-Active	0.0774678	non-Active
P1_AGTTGGTAGGGTGTGT.1	Monocytes	0.130389	non-Active	0.0273374	non-Active
P1_AGTTGGTAGTAATCCC.1	Epithelial cells	0.0839209	non-Active	0.0262101	non-Active
P1_AGTTGGTCAATACGCT.1	CD8+ T-cells	0.0890191	non-Active	0.0582329	non-Active
P1_AGTTGGTGTCGAGATG.1	Epithelial cells	0.221922	non-Active	0.0377299	non-Active
P1_AGTTGGTGTTAGGGTG.1	Epithelial cells	0.117515	non-Active	0.0795463	non-Active
P1_AGTTGGTGTTCCATGA.1	CD8+ T-cells	0.110569	non-Active	0.0631297	non-Active
P1_ATAACGCAGGAATCGC.1	CD8+ T-cells	0.104197	non-Active	0.016945	non-Active
P1_ATAACGCAGTCCATAC.1	Epithelial cells	0.162194	non-Active	0.0410766	non-Active
P1_ATAACGCAGTGCAAGC.1	Epithelial cells	0.14138	non-Active	0.0921581	non-Active
P1_ATAACGCAGTGGTAAT.1	Macrophages	0.268671	OS-Active	0.260058	Metabolism-Active
P1_ATAACGCCACGAAACG.1	Epithelial cells	0.144093	non-Active	0.0340661	non-Active
P1_ATAACGCCACTGCCAG.1	Epithelial cells	0.169923	non-Active	0.072888	non-Active
P1_ATAACGCGTATTCGTG.1	Macrophages	0.220577	non-Active	0	non-Active
P1_ATAACGCGTCATATCG.1	Epithelial cells	0.140971	non-Active	0.0666173	non-Active
P1_ATAACGCTCGATAGAA.1	Fibroblasts	0.161048	non-Active	0.100402	non-Active
P1_ATAACGCTCTGGGCCA.1	Epithelial cells	0.147578	non-Active	0.0598534	non-Active
P1_ATAAGAGAGCCAACAG.1	Epithelial cells	0.0862595	non-Active	0.0394561	non-Active
P1_ATAAGAGAGGAATTAC.1	Fibroblasts	0.237614	non-Active	0.176355	non-Active
P1_ATAAGAGCAACGATCT.1	Epithelial cells	0.111505	non-Active	0.0697175	non-Active
P1_ATAAGAGCATCGGGTC.1	Epithelial cells	0.118146	non-Active	0.0680617	non-Active
P1_ATAAGAGGTAAACACA.1	Epithelial cells	0.229207	non-Active	0.0654548	non-Active
P1_ATAAGAGTCCAGAGGA.1	Epithelial cells	0.142222	non-Active	0.0542169	non-Active
P1_ATAAGAGTCCATTCTA.1	Epithelial cells	0.110254	non-Active	0.0060241	non-Active
P1_ATAAGAGTCGCCAAAT.1	Epithelial cells	0.106933	non-Active	0.0489678	non-Active
P1_ATAAGAGTCGCCGTGA.1	Epithelial cells	0.117305	non-Active	0.0579511	non-Active
P1_ATAGACCAGATGTGTA.1	Epithelial cells	0.124507	non-Active	0.071338	non-Active
P1_ATAGACCAGATTACCC.1	Fibroblasts	0.19822	non-Active	0.274537	Metabolism-Active
P1_ATAGACCAGGAGTTGC.1	CD8+ T-cells	0.128039	non-Active	0.0188825	non-Active
P1_ATAGACCCAATGGATA.1	Epithelial cells	0.247682	non-Active	0.118333	non-Active
P1_ATAGACCCACCCTATC.1	Epithelial cells	0.122566	non-Active	0.0483689	non-Active
P1_ATAGACCCAGACACTT.1	Epithelial cells	0.0896622	non-Active	0.0547805	non-Active
P1_ATAGACCCAGTATGCT.1	Epithelial cells	0.0841431	non-Active	0.0920524	non-Active
P1_ATAGACCCATGTAGTC.1	CD8+ T-cells	0.111996	non-Active	0.0475587	non-Active
P1_ATAGACCGTCCTGCTT.1	CD8+ T-cells	0.0969469	non-Active	0.0419925	non-Active
P1_ATAGACCGTTAAGAAC.1	Endothelial cells	0.260462	OS-Active	0.119742	non-Active
P1_ATAGACCGTTCCGGCA.1	Epithelial cells	0.117398	non-Active	0.0267033	non-Active
P1_ATAGACCTCAGCTGGC.1	Epithelial cells	0.0941289	non-Active	0.107271	non-Active
P1_ATAGACCTCTGGCGTG.1	Macrophages	0.183475	non-Active	0.0941661	non-Active
P1_ATCACGAAGAAGAAGC.1	Fibroblasts	0.220648	non-Active	0.100824	non-Active
P1_ATCACGAAGGTGATTA.1	Epithelial cells	0.201307	non-Active	0.100225	non-Active
P1_ATCACGAAGTACGCCC.1	Epithelial cells	0.105892	non-Active	0.0735926	non-Active
P1_ATCACGACAAGCCGCT.1	Epithelial cells	0.115586	non-Active	0.0499894	non-Active
P1_ATCACGACAGCTCGAC.1	B-cells	0.181593	non-Active	0.0899739	non-Active
P1_ATCACGACAGTGACAG.1	Epithelial cells	0.103939	non-Active	0.0368492	non-Active
P1_ATCACGAGTACATGTC.1	B-cells	0.0858035	non-Active	0.0065173	non-Active
P1_ATCACGAGTGACAAAT.1	Epithelial cells	0.0713158	non-Active	0.0476643	non-Active
P1_ATCACGAGTGGTTTCA.1	Myofibroblasts	0.248337	non-Active	0.140527	non-Active
P1_ATCACGATCCTAGAAC.1	Macrophages	0.227921	non-Active	0.126506	non-Active
P1_ATCATCTAGTTACGGG.1	Epithelial cells	0.12031	non-Active	0.0439301	non-Active
P1_ATCATCTCAGGTGGAT.1	Epithelial cells	0.230166	non-Active	0.0692947	non-Active
P1_ATCATCTCATAACCTG.1	CD8+ T-cells	0.128834	non-Active	0.0401959	non-Active
P1_ATCATCTTCCTAAGTG.1	Epithelial cells	0.234001	non-Active	0.125942	non-Active
P1_ATCATCTTCGGTGTCG.1	B-cells	0.125899	non-Active	0.0506235	non-Active
P1_ATCATGGAGTGGAGTC.1	Epithelial cells	0.130611	non-Active	0.062249	non-Active
P1_ATCATGGAGTTGAGTA.1	Fibroblasts	0.259164	OS-Active	0.303178	Metabolism-Active
P1_ATCATGGCACACATGT.1	CD8+ T-cells	0.142608	non-Active	0.118509	non-Active
P1_ATCATGGCACACCGCA.1	Fibroblasts	0.124016	non-Active	0.0949764	non-Active
P1_ATCATGGGTGCGGTAA.1	CD8+ T-cells	0.106091	non-Active	0.0338195	non-Active
P1_ATCATGGTCGTTTAGG.1	Monocytes	0.197285	non-Active	0.0841964	non-Active
P1_ATCCACCAGAGTAAGG.1	Epithelial cells	0.0640895	non-Active	0.0203622	non-Active
P1_ATCCACCAGGGTGTGT.1	Epithelial cells	0.15139	non-Active	0.0677799	non-Active
P1_ATCCACCAGGGTTTCT.1	Epithelial cells	0.108242	non-Active	0.0370958	non-Active
P1_ATCCACCAGTGGGCTA.1	Myofibroblasts	0.155681	non-Active	0.122983	non-Active
P1_ATCCACCCAACACCTA.1	Fibroblasts	0.131769	non-Active	0.138484	non-Active
P1_ATCCACCCACGAGGTA.1	CD8+ T-cells	0.108172	non-Active	0.0105686	non-Active
P1_ATCCACCGTTGAGTTC.1	Epithelial cells	0.134926	non-Active	0.0763404	non-Active
P1_ATCCACCTCAGCTGGC.1	Fibroblasts	0.131254	non-Active	0.132495	non-Active
P1_ATCCACCTCCAATGGT.1	CD8+ T-cells	0.132728	non-Active	0.0287818	non-Active
P1_ATCCGAAAGATCCCGC.1	CD8+ T-cells	0.122017	non-Active	0.120588	non-Active
P1_ATCCGAAAGCGTTCCG.1	Epithelial cells	0.164626	non-Active	0.0284295	non-Active
P1_ATCCGAAAGGGATGGG.1	Epithelial cells	0.1181	non-Active	0	non-Active
P1_ATCCGAACAAACGTGG.1	CD8+ T-cells	0.134271	non-Active	0.0420982	non-Active
P1_ATCCGAACAAAGGAAG.1	Endothelial cells	0.137066	non-Active	0.0567886	non-Active
P1_ATCCGAACATCACGAT.1	Epithelial cells	0.143006	non-Active	0.0930036	non-Active
P1_ATCCGAAGTGCCTGCA.1	Epithelial cells	0.148233	non-Active	0.026351	non-Active
P1_ATCCGAAGTTCCAACA.1	Epithelial cells	0.0684159	non-Active	0	non-Active
P1_ATCCGAATCCAAAGTC.1	Epithelial cells	0.119959	non-Active	0.0106743	non-Active
P1_ATCCGAATCCCGGATG.1	Fibroblasts	0.30693	OS-Active	0.351758	Metabolism-Active
P1_ATCCGAATCGGAAACG.1	CD8+ T-cells	0.114264	non-Active	0.0125062	non-Active
P1_ATCCGAATCTGGTATG.1	Epithelial cells	0.119608	non-Active	0.069647	non-Active
P1_ATCGAGTAGACTAGAT.1	CD8+ T-cells	0.0551911	non-Active	0.0277602	non-Active
P1_ATCGAGTAGATCGGGT.1	Epithelial cells	0.0976135	non-Active	0.0104629	non-Active
P1_ATCGAGTAGGATGGAA.1	Epithelial cells	0.102256	non-Active	0.0321637	non-Active
P1_ATCGAGTCAAGCGATG.1	Epithelial cells	0.119398	non-Active	0.0771507	non-Active
P1_ATCGAGTGTCCAGTTA.1	Epithelial cells	0.157973	non-Active	0.0476643	non-Active
P1_ATCGAGTTCTGGAGCC.1	Epithelial cells	0.0741455	non-Active	0.105475	non-Active
P1_ATCTACTAGTCTTGCA.1	Epithelial cells	0.0851721	non-Active	0.0559431	non-Active
P1_ATCTACTCAACCGCCA.1	CD8+ T-cells	0.149776	non-Active	0.0345241	non-Active
P1_ATCTACTCAGACAAGC.1	Epithelial cells	0.174331	non-Active	0.072571	non-Active
P1_ATCTACTCAGGGTACA.1	Epithelial cells	0.236796	non-Active	0.159198	non-Active
P1_ATCTACTCATAACCTG.1	Epithelial cells	0.118193	non-Active	0.0396322	non-Active
P1_ATCTACTCATGAACCT.1	Epithelial cells	0.12031	non-Active	0.0230043	non-Active
P1_ATCTACTGTAAAGTCA.1	Fibroblasts	0.154547	non-Active	0.115902	non-Active
P1_ATCTACTTCCAAACAC.1	Fibroblasts	0.193157	non-Active	0.365497	Metabolism-Active
P1_ATCTACTTCCAACCAA.1	Myofibroblasts	0.219747	non-Active	0.132882	non-Active
P1_ATCTACTTCTCCGGTT.1	Epithelial cells	0.0987126	non-Active	0.0739449	non-Active
P1_ATCTGCCCACTTGGAT.1	Fibroblasts	0.234153	non-Active	0.175791	non-Active
P1_ATCTGCCCAGACAGGT.1	Epithelial cells	0.0833713	non-Active	0.0130698	non-Active
P1_ATCTGCCCAGTATGCT.1	Epithelial cells	0.165351	non-Active	0.0521031	non-Active
P1_ATCTGCCGTACTTCTT.1	Epithelial cells	0.115223	non-Active	0.0383992	non-Active
P1_ATCTGCCGTTCTGGTA.1	Epithelial cells	0.123315	non-Active	0.0911012	non-Active
P1_ATCTGCCTCAGTGTTG.1	Endothelial cells	0.191134	non-Active	0.119707	non-Active
P1_ATCTGCCTCGCCATAA.1	Epithelial cells	0.12798	non-Active	0.0458677	non-Active
P1_ATGAGGGCACATTCGA.1	Epithelial cells	0.163375	non-Active	0.018495	non-Active
P1_ATGAGGGGTAAATGTG.1	Epithelial cells	0.0895803	non-Active	0.0244487	non-Active
P1_ATGCGATAGACTCGGA.1	Epithelial cells	0.179967	non-Active	0.0422039	non-Active
P1_ATGCGATAGAGCTATA.1	Epithelial cells	0.134634	non-Active	0.108258	non-Active
P1_ATGCGATAGAGTACCG.1	CD8+ T-cells	0.0569802	non-Active	0.0285704	non-Active
P1_ATGCGATCACCACCAG.1	Epithelial cells	0.196244	non-Active	0.0323751	non-Active
P1_ATGCGATGTCGACTGC.1	CD8+ T-cells	0.0653758	non-Active	0.00581272	non-Active
P1_ATGCGATGTCTTGCGG.1	Epithelial cells	0.156464	non-Active	0.0320581	non-Active
P1_ATGCGATTCACCGGGT.1	Epithelial cells	0.174951	non-Active	0	non-Active
P1_ATGCGATTCTCAACTT.1	Epithelial cells	0.227734	non-Active	0.177376	non-Active
P1_ATGCGATTCTGTTTGT.1	CD8+ T-cells	0.0735258	non-Active	0.0426266	non-Active
P1_ATGCGATTCTTCGAGA.1	Fibroblasts	0.2659	OS-Active	0.368914	Metabolism-Active
P1_ATGGGAGAGTACGACG.1	CD8+ T-cells	0.0964208	non-Active	0.0556612	non-Active
P1_ATGGGAGGTAAGCACG.1	Epithelial cells	0.101659	non-Active	0	non-Active
P1_ATGGGAGGTGCTTCTC.1	Macrophages	0.285228	OS-Active	0.0948003	non-Active
P1_ATGGGAGTCCTTTCTC.1	Epithelial cells	0.116018	non-Active	0.0373071	non-Active
P1_ATGGGAGTCTACCTGC.1	Epithelial cells	0.114639	non-Active	0	non-Active
P1_ATGGGAGTCTATCCTA.1	Myofibroblasts	0.153132	non-Active	0.16487	non-Active
P1_ATGTGTGCAAGTTCTG.1	Monocytes	0.19815	non-Active	0.0809202	non-Active
P1_ATGTGTGCACACTGCG.1	Epithelial cells	0.142889	non-Active	0.0442472	non-Active
P1_ATGTGTGGTTAAGTAG.1	Epithelial cells	0.126799	non-Active	0.0470302	non-Active
P1_ATGTGTGGTTCCACAA.1	Epithelial cells	0.142281	non-Active	0.0687311	non-Active
P1_ATTACTCCACATGGGA.1	Epithelial cells	0.0900948	non-Active	0.0518213	non-Active
P1_ATTACTCCATGCTGGC.1	Epithelial cells	0.122812	non-Active	0.0297682	non-Active
P1_ATTACTCGTGAGCGAT.1	Epithelial cells	0.192479	non-Active	0.0963151	non-Active
P1_ATTACTCGTTACCGAT.1	Endothelial cells	0.245332	non-Active	0.194427	Metabolism-Active
P1_ATTACTCTCCTAGGGC.1	Epithelial cells	0.0882239	non-Active	0.0343127	non-Active
P1_ATTATCCAGCATCATC.1	Epithelial cells	0.0635516	non-Active	0.0133164	non-Active
P1_ATTATCCAGGCATGGT.1	Epithelial cells	0.118521	non-Active	0.0340661	non-Active
P1_ATTATCCCACCAGCAC.1	CD8+ T-cells	0.118906	non-Active	0.079194	non-Active
P1_ATTATCCCAGACGCCT.1	Epithelial cells	0.139229	non-Active	0	non-Active
P1_ATTATCCCAGGCAGTA.1	Epithelial cells	0.12266	non-Active	0.0407243	non-Active
P1_ATTATCCGTGCACGAA.1	Epithelial cells	0.118965	non-Active	0.0565772	non-Active
P1_ATTATCCTCAATCTCT.1	Epithelial cells	0.114966	non-Active	0.0348059	non-Active
P1_ATTATCCTCACGCATA.1	Epithelial cells	0.247752	non-Active	0.0416402	non-Active
P1_ATTATCCTCGGTGTTA.1	CD8+ T-cells	0.101963	non-Active	0.00496724	non-Active
P1_ATTCTACAGTGGACGT.1	Epithelial cells	0.0974264	non-Active	0.02466	non-Active
P1_ATTCTACGTCGGGTCT.1	CD8+ T-cells	0.140012	non-Active	0.0376242	non-Active
P1_ATTCTACTCCGTTGTC.1	Epithelial cells	0.107307	non-Active	0.0609455	non-Active
P1_ATTCTACTCGCAAGCC.1	Epithelial cells	0.0656915	non-Active	0.0444585	non-Active
P1_ATTCTACTCGTGGACC.1	Epithelial cells	0.10954	non-Active	0.0387163	non-Active
P1_ATTGGACCAAGCCTAT.1	CD8+ T-cells	0.0969586	non-Active	0.0281829	non-Active
P1_ATTGGACCAAGGACTG.1	Epithelial cells	0.13357	non-Active	0.0801099	non-Active
P1_ATTGGACCAGACAAAT.1	Monocytes	0.162592	non-Active	0.049919	non-Active
P1_ATTGGACGTGGTAACG.1	Epithelial cells	0.15823	non-Active	0.0532657	non-Active
P1_ATTGGACTCTAACTCT.1	Epithelial cells	0.118041	non-Active	0.0721835	non-Active
P1_ATTGGTGAGCGTTTAC.1	Epithelial cells	0.139545	non-Active	0.0388924	non-Active
P1_ATTGGTGAGGCATTGG.1	Endothelial cells	0.152337	non-Active	0.126753	non-Active
P1_ATTGGTGCACATCTTT.1	Epithelial cells	0.125981	non-Active	0.0528077	non-Active
P1_ATTGGTGCATTATCTC.1	Myofibroblasts	0.23503	non-Active	0.213591	Metabolism-Active
P1_ATTGGTGGTTCAGGCC.1	Epithelial cells	0.0780627	non-Active	0.0168745	non-Active
P1_ATTGGTGTCGGCATCG.1	Epithelial cells	0.109599	non-Active	0.0592193	non-Active
P1_ATTTCTGAGAATTCCC.1	Epithelial cells	0.207879	non-Active	0.0546044	non-Active
P1_ATTTCTGAGAGAACAG.1	Endothelial cells	0.189801	non-Active	0.0756006	non-Active
P1_ATTTCTGAGAGGTACC.1	Monocytes	0.233171	non-Active	0.0809554	non-Active
P1_ATTTCTGAGGACGAAA.1	Epithelial cells	0.089709	non-Active	0	non-Active
P1_ATTTCTGAGGAGTTGC.1	CD8+ T-cells	0.139007	non-Active	0.0617558	non-Active
P1_ATTTCTGAGGGTGTGT.1	Epithelial cells	0.194385	non-Active	0	non-Active
P1_ATTTCTGAGTCAAGGC.1	Epithelial cells	0.111704	non-Active	0.0358627	non-Active
P1_ATTTCTGCACGTCTCT.1	Epithelial cells	0.109704	non-Active	0.0683788	non-Active
P1_ATTTCTGGTCCCTACT.1	Macrophages	0.308193	OS-Active	0.279856	Metabolism-Active
P1_ATTTCTGGTGCGATAG.1	Endothelial cells	0.24677	non-Active	0.0732051	non-Active
P1_ATTTCTGGTTCTGTTT.1	Epithelial cells	0.219478	non-Active	0.263299	Metabolism-Active
P1_CAACCAAAGATCACGG.1	Fibroblasts	0.170134	non-Active	0.209469	Metabolism-Active
P1_CAACCAAAGCGATGAC.1	Epithelial cells	0.0967599	non-Active	0.0268794	non-Active
P1_CAACCAACATCGGTTA.1	Epithelial cells	0.134107	non-Active	0.074121	non-Active
P1_CAACCAAGTTTGGGCC.1	Fibroblasts	0.169631	non-Active	0.032199	non-Active
P1_CAACCAATCATGCATG.1	Epithelial cells	0.13751	non-Active	0.0900444	non-Active
P1_CAACCAATCCGCGCAA.1	Fibroblasts	0.231499	non-Active	0.246037	Metabolism-Active
P1_CAACCAATCCTAAGTG.1	Epithelial cells	0.0904573	non-Active	0.0101811	non-Active
P1_CAACCAATCGCATGGC.1	Epithelial cells	0.0953216	non-Active	0.0175439	non-Active
P1_CAACCTCAGAAGATTC.1	Fibroblasts	0.208346	non-Active	0.209082	Metabolism-Active
P1_CAACCTCAGAGCTTCT.1	Epithelial cells	0.0982215	non-Active	0.0317058	non-Active
P1_CAACCTCAGATACACA.1	Epithelial cells	0.0816525	non-Active	0.0871556	non-Active
P1_CAACCTCAGGGTGTTG.1	CD8+ T-cells	0.0983969	non-Active	0	non-Active
P1_CAACCTCCAAACGCGA.1	Monocytes	0.155319	non-Active	0.0505531	non-Active
P1_CAACCTCCAAGTCATC.1	Epithelial cells	0.130249	non-Active	0.0548862	non-Active
P1_CAACCTCCACGTCAGC.1	Macrophages	0.282024	OS-Active	0.171669	non-Active
P1_CAACCTCGTTCGCGAC.1	Epithelial cells	0.100923	non-Active	0.0518565	non-Active
P1_CAACCTCTCAATCACG.1	Epithelial cells	0.172028	non-Active	0	non-Active
P1_CAACCTCTCCTTGCCA.1	Epithelial cells	0.129816	non-Active	0.0685197	non-Active
P1_CAACCTCTCTTCATGT.1	Epithelial cells	0.217444	non-Active	0.00810259	non-Active
P1_CAACTAGAGCCCAATT.1	Epithelial cells	0.132424	non-Active	0.0663003	non-Active
P1_CAACTAGCACCAGTTA.1	Epithelial cells	0.124531	non-Active	0.0373071	non-Active
P1_CAACTAGCAGCTGGCT.1	Monocytes	0.122239	non-Active	0.0429789	non-Active
P1_CAACTAGGTATTCGTG.1	Myofibroblasts	0.155026	non-Active	0.121644	non-Active
P1_CAACTAGGTGTGCGTC.1	Epithelial cells	0.160206	non-Active	0.0571056	non-Active
P1_CAACTAGGTTCTGGTA.1	Epithelial cells	0.11548	non-Active	0.0397379	non-Active
P1_CAACTAGTCAAGCCTA.1	Epithelial cells	0.066814	non-Active	0.0312126	non-Active
P1_CAACTAGTCATTGCCC.1	Epithelial cells	0.0789748	non-Active	0	non-Active
P1_CAAGAAAAGAATGTTG.1	Epithelial cells	0.0864115	non-Active	0.0558726	non-Active
P1_CAAGAAAAGACGCACA.1	CD8+ T-cells	0.102478	non-Active	0.0308603	non-Active
P1_CAAGAAAAGAGGTTGC.1	Epithelial cells	0.114697	non-Active	0.00542521	non-Active
P1_CAAGAAAAGCTATGCT.1	Epithelial cells	0.119737	non-Active	0.0658423	non-Active
P1_CAAGAAACAAGCGTAG.1	CD8+ T-cells	0.102373	non-Active	0.0263862	non-Active
P1_CAAGAAAGTGCACCAC.1	Myofibroblasts	0.113224	non-Active	0.134327	non-Active
P1_CAAGATCAGAGTACAT.1	Epithelial cells	0.247004	non-Active	0.0261396	non-Active
P1_CAAGATCAGGATCGCA.1	Epithelial cells	0.14552	non-Active	0.0336433	non-Active
P1_CAAGATCAGGCATGGT.1	Epithelial cells	0.109786	non-Active	0.0620729	non-Active
P1_CAAGATCAGTGAATTG.1	CD8+ T-cells	0.129138	non-Active	0.0621081	non-Active
P1_CAAGATCAGTGGTAAT.1	Epithelial cells	0.106325	non-Active	0.0521384	non-Active
P1_CAAGATCCAACTGCTA.1	Epithelial cells	0.156383	non-Active	0.0492849	non-Active
P1_CAAGATCCAAGTAATG.1	Epithelial cells	0.199764	non-Active	0.0450927	non-Active
P1_CAAGATCCACCGGAAA.1	Epithelial cells	0.204219	non-Active	0.0381878	non-Active
P1_CAAGATCGTAAATACG.1	Epithelial cells	0.0716315	non-Active	0.0692595	non-Active
P1_CAAGATCGTGCAACTT.1	Epithelial cells	0.111411	non-Active	0.00327626	non-Active
P1_CAAGGCCAGAGTAATC.1	Fibroblasts	0.309842	OS-Active	0.323505	Metabolism-Active
P1_CAAGGCCCAGCTGCTG.1	Epithelial cells	0.130705	non-Active	0.071338	non-Active
P1_CAAGGCCTCATATCGG.1	Epithelial cells	0.130354	non-Active	0.103748	non-Active
P1_CAAGTTGAGAGGTTAT.1	Epithelial cells	0.145964	non-Active	0.00982879	non-Active
P1_CAAGTTGCAACTGCTA.1	Epithelial cells	0.148233	non-Active	0.0338899	non-Active
P1_CAAGTTGCATGCCCGA.1	Epithelial cells	0.0967131	non-Active	0	non-Active
P1_CAAGTTGGTACCAGTT.1	Epithelial cells	0.152582	non-Active	0.0365673	non-Active
P1_CAAGTTGGTTGGTGGA.1	Macrophages	0.219794	non-Active	0.0388924	non-Active
P1_CAAGTTGGTTGGTTTG.1	Mast	0.142094	non-Active	0.0900092	non-Active
P1_CAAGTTGTCACATGCA.1	Epithelial cells	0.123794	non-Active	0.0506588	non-Active
P1_CAAGTTGTCACCTCGT.1	Epithelial cells	0.124858	non-Active	0.0343479	non-Active
P1_CACAAACCACATGACT.1	Epithelial cells	0.103647	non-Active	0.0283238	non-Active
P1_CACAAACGTAAGAGAG.1	Epithelial cells	0.124963	non-Active	0.00965265	non-Active
P1_CACAAACGTCTGATTG.1	Epithelial cells	0.100104	non-Active	0.0497781	non-Active
P1_CACAAACTCAGCTTAG.1	Epithelial cells	0.150828	non-Active	0.0778201	non-Active
P1_CACAAACTCTGCTTGC.1	Epithelial cells	0.165772	non-Active	0.0434017	non-Active
P1_CACAAACTCTGTGCAA.1	Epithelial cells	0.136551	non-Active	0.146234	non-Active
P1_CACACAAAGCCCAATT.1	Epithelial cells	0.205832	non-Active	0.108469	non-Active
P1_CACACAAAGGCTCAGA.1	Epithelial cells	0.162241	non-Active	0.0186359	non-Active
P1_CACACAAAGGTCGGAT.1	Epithelial cells	0.181078	non-Active	0.0169802	non-Active
P1_CACACAAAGTGTTAGA.1	Epithelial cells	0.098888	non-Active	0.0473825	non-Active
P1_CACACAAAGTTCGATC.1	Epithelial cells	0.145169	non-Active	0.0682731	non-Active
P1_CACACAAGTTTAGGAA.1	Epithelial cells	0.0800856	non-Active	0.0581625	non-Active
P1_CACACAATCGGCGGTT.1	Epithelial cells	0.158195	non-Active	0.116959	non-Active
P1_CACACCTCAGACACTT.1	Monocytes	0.170707	non-Active	0.0842669	non-Active
P1_CACACCTCAGCCAATT.1	Epithelial cells	0.18758	non-Active	0.0797929	non-Active
P1_CACACCTCAGGATTGG.1	Epithelial cells	0.207727	non-Active	0.0951173	non-Active
P1_CACACCTCAGGCTCAC.1	CD8+ T-cells	0.123666	non-Active	0.0289932	non-Active
P1_CACACCTCAGTGGAGT.1	Macrophages	0.246138	non-Active	0.132213	non-Active
P1_CACACCTGTACCGTTA.1	Epithelial cells	0.0815823	non-Active	0.0101458	non-Active
P1_CACACCTGTAGAAGGA.1	Epithelial cells	0.0912174	non-Active	0.0929331	non-Active
P1_CACACCTTCAACACCA.1	Myofibroblasts	0.121514	non-Active	0.0666526	non-Active
P1_CACACCTTCGCCCTTA.1	Monocytes	0.18054	non-Active	0.0697879	non-Active
P1_CACACCTTCTGTCTCG.1	Epithelial cells	0.206218	non-Active	0.302438	Metabolism-Active
P1_CACACTCAGTGGTCCC.1	Epithelial cells	0.116053	non-Active	0.0385401	non-Active
P1_CACACTCCACTATCTT.1	Epithelial cells	0.0939068	non-Active	0.0544282	non-Active
P1_CACACTCTCACGACTA.1	Epithelial cells	0.140644	non-Active	0.0781371	non-Active
P1_CACACTCTCTTCAACT.1	Epithelial cells	0.164626	non-Active	0.00207849	non-Active
P1_CACAGGCAGACAGACC.1	Epithelial cells	0.0874756	non-Active	0.0307546	non-Active
P1_CACAGGCCAACACCTA.1	Epithelial cells	0.107541	non-Active	0.0201508	non-Active
P1_CACAGGCCAACTGCGC.1	Epithelial cells	0.109903	non-Active	0.043754	non-Active
P1_CACAGGCCACCCATTC.1	Epithelial cells	0.200536	non-Active	0.102762	non-Active
P1_CACAGGCCATCACGAT.1	B-cells	0.112803	non-Active	0.0427676	non-Active
P1_CACAGGCCATCGGAAG.1	Epithelial cells	0.119199	non-Active	0.0472416	non-Active
P1_CACAGGCGTACTTGAC.1	Epithelial cells	0.126858	non-Active	0.0564715	non-Active
P1_CACAGGCGTCCCTACT.1	CD8+ T-cells	0.111329	non-Active	0.0082435	non-Active
P1_CACAGTAAGAAGAAGC.1	Fibroblasts	0.22612	non-Active	0.22335	Metabolism-Active
P1_CACAGTAAGATCTGCT.1	Epithelial cells	0.112569	non-Active	0.0410766	non-Active
P1_CACAGTAAGATGCCTT.1	Epithelial cells	0.154851	non-Active	0.077045	non-Active
P1_CACAGTAAGCCGGTAA.1	Epithelial cells	0.13399	non-Active	0.0568942	non-Active
P1_CACAGTAAGGTGGGTT.1	Epithelial cells	0.103062	non-Active	0.0361446	non-Active
P1_CACAGTAAGTTATCGC.1	Epithelial cells	0.0935092	non-Active	0	non-Active
P1_CACAGTACAAGACGTG.1	Epithelial cells	0.123923	non-Active	0.0680969	non-Active
P1_CACAGTATCAACTCTT.1	Epithelial cells	0.0757592	non-Active	0.0499894	non-Active
P1_CACAGTATCCTTTCTC.1	CD8+ T-cells	0.117141	non-Active	0.0646093	non-Active
P1_CACAGTATCGGCGCAT.1	CD8+ T-cells	0.0977187	non-Active	0.0255055	non-Active
P1_CACAGTATCGGTGTCG.1	Epithelial cells	0.177991	non-Active	0.0434017	non-Active
P1_CACATAGGTCCAACTA.1	Epithelial cells	0.202313	non-Active	0.0523145	non-Active
P1_CACATAGGTCCGTGAC.1	Epithelial cells	0.0777587	non-Active	0.0299796	non-Active
P1_CACATAGTCATCACCC.1	Epithelial cells	0.205645	non-Active	0.110653	non-Active
P1_CACATAGTCTCATTCA.1	Epithelial cells	0.125232	non-Active	0.0444938	non-Active
P1_CACATTTCACAGTCGC.1	B-cells	0.162592	non-Active	0.15328	non-Active
P1_CACATTTTCAAACAAG.1	Endothelial cells	0.186399	non-Active	0.0983936	non-Active
P1_CACATTTTCAGTCCCT.1	Epithelial cells	0.147706	non-Active	0.0330797	non-Active
P1_CACATTTTCTCTTATG.1	Endothelial cells	0.243051	non-Active	0.0350525	non-Active
P1_CACCACTCAAGGGTCA.1	Epithelial cells	0.106079	non-Active	0.0483689	non-Active
P1_CACCACTGTCCTGCTT.1	Epithelial cells	0.158043	non-Active	0.0295216	non-Active
P1_CACCACTGTGCATCTA.1	Epithelial cells	0.140679	non-Active	0.0119073	non-Active
P1_CACCACTGTTTGACAC.1	CD8+ T-cells	0.0543843	non-Active	0.0372367	non-Active
P1_CACCACTTCCCAACGG.1	Epithelial cells	0.104863	non-Active	0.0284647	non-Active
P1_CACCAGGAGCGTTGCC.1	Epithelial cells	0.0923867	non-Active	0	non-Active
P1_CACCAGGCATGTTCCC.1	Epithelial cells	0.135335	non-Active	0.0230043	non-Active
P1_CACCAGGGTCCGCTGA.1	Epithelial cells	0.0912524	non-Active	0.00771507	non-Active
P1_CACCAGGGTCTAGAGG.1	Epithelial cells	0.150524	non-Active	0.0265976	non-Active
P1_CACCAGGTCTTAACCT.1	Epithelial cells	0.0914746	non-Active	0.0689424	non-Active
P1_CACCAGGTCTTGCAAG.1	Epithelial cells	0.122485	non-Active	0.0573522	non-Active
P1_CACCAGGTCTTGTACT.1	Epithelial cells	0.235135	non-Active	0.157542	non-Active
P1_CACCAGGTCTTGTATC.1	Epithelial cells	0.0988295	non-Active	0.027267	non-Active
P1_CACCTTGAGACCGGAT.1	Epithelial cells	0.0617509	non-Active	0.0019728	non-Active
P1_CACCTTGAGCTGGAAC.1	Epithelial cells	0.11223	non-Active	0.0447404	non-Active
P1_CACCTTGAGGATATAC.1	Epithelial cells	0.110464	non-Active	0.0611569	non-Active
P1_CACCTTGCACTCGACG.1	Epithelial cells	0.0976018	non-Active	0.0423096	non-Active
P1_CACCTTGCAGACGCCT.1	Epithelial cells	0.111505	non-Active	0.0939195	non-Active
P1_CACCTTGCAGGATTGG.1	Epithelial cells	0.0824359	non-Active	0	non-Active
P1_CACCTTGCAGTTAACC.1	Epithelial cells	0.125174	non-Active	0.0180371	non-Active
P1_CACCTTGGTAGCGTGA.1	Epithelial cells	0.0752096	non-Active	0.00968787	non-Active
P1_CACCTTGGTGTAAGTA.1	Epithelial cells	0.131593	non-Active	0.0371662	non-Active
P1_CACCTTGGTTTGTTTC.1	Epithelial cells	0.138153	non-Active	0.0494962	non-Active
P1_CACCTTGTCCCGGATG.1	CD8+ T-cells	0.128378	non-Active	0.0637638	non-Active
P1_CACCTTGTCGCGCCAA.1	Fibroblasts	0.267396	OS-Active	0.328296	Metabolism-Active
P1_CACCTTGTCTCCAGGG.1	Epithelial cells	0.129173	non-Active	0.0289227	non-Active
P1_CACTCCAAGCCTTGAT.1	CD8+ T-cells	0.0949942	non-Active	0	non-Active
P1_CACTCCACAAAGTGCG.1	Epithelial cells	0.138446	non-Active	0.0554146	non-Active
P1_CACTCCACACCAACCG.1	Epithelial cells	0.104594	non-Active	0.0593955	non-Active
P1_CACTCCACATCCCATC.1	Epithelial cells	0.125209	non-Active	0.041147	non-Active
P1_CACTCCAGTTCCACTC.1	Fibroblasts	0.185861	non-Active	0.202776	Metabolism-Active
P1_CACTCCATCTGTGCAA.1	Epithelial cells	0.242268	non-Active	0.109878	non-Active
P1_CAGAATCAGAACTCGG.1	Epithelial cells	0.143661	non-Active	0.0839146	non-Active
P1_CAGAATCAGAGTACAT.1	Epithelial cells	0.100969	non-Active	0.0448461	non-Active
P1_CAGAATCAGAGTCGGT.1	Epithelial cells	0.138329	non-Active	0.0124005	non-Active
P1_CAGAATCAGGGATACC.1	Epithelial cells	0.108944	non-Active	0.0443176	non-Active
P1_CAGAATCAGTGGGTTG.1	Epithelial cells	0.149414	non-Active	0.0880011	non-Active
P1_CAGAATCCATTGGCGC.1	Epithelial cells	0.0936846	non-Active	0	non-Active
P1_CAGAATCGTTCAGTAC.1	Epithelial cells	0.0970639	non-Active	0.120094	non-Active
P1_CAGAATCTCACTATTC.1	Epithelial cells	0.153331	non-Active	0.112344	non-Active
P1_CAGAATCTCCTCAACC.1	Macrophages	0.270635	OS-Active	0.193898	Metabolism-Active
P1_CAGAATCTCGAGGTAG.1	Fibroblasts	0.232773	non-Active	0.296836	Metabolism-Active
P1_CAGAGAGGTTCGAATC.1	Monocytes	0.236153	non-Active	0.0544282	non-Active
P1_CAGATCAAGAAGAAGC.1	Epithelial cells	0.212053	non-Active	0.0888818	non-Active
P1_CAGATCAAGACACGAC.1	Epithelial cells	0.10864	non-Active	0.108081	non-Active
P1_CAGATCAAGAGTAATC.1	Epithelial cells	0.105261	non-Active	0.026809	non-Active
P1_CAGATCAAGATGTGTA.1	Epithelial cells	0.142795	non-Active	0.0698232	non-Active
P1_CAGATCAAGCTCAACT.1	Epithelial cells	0.176986	non-Active	0.0403368	non-Active
P1_CAGATCAAGGCATGTG.1	Epithelial cells	0.086318	non-Active	0.0283591	non-Active
P1_CAGATCACAACACGCC.1	Epithelial cells	0.051461	non-Active	0.0515395	non-Active
P1_CAGATCACACTCGACG.1	Epithelial cells	0.139475	non-Active	0.0793701	non-Active
P1_CAGATCACAGGGCATA.1	CD8+ T-cells	0.0854644	non-Active	0	non-Active
P1_CAGATCACAGTTTACG.1	Epithelial cells	0.109634	non-Active	0.0453745	non-Active
P1_CAGATCACATCCGTGG.1	B-cells	0.124238	non-Active	0.0877545	non-Active
P1_CAGATCAGTTTGACAC.1	Epithelial cells	0.0932052	non-Active	0.00355809	non-Active
P1_CAGATCATCCTCATTA.1	Epithelial cells	0.134447	non-Active	0.0587261	non-Active
P1_CAGCAGCAGAAGGGTA.1	CD8+ T-cells	0.0810561	non-Active	0.0443528	non-Active
P1_CAGCAGCAGCCGGTAA.1	Epithelial cells	0.103624	non-Active	0.0468189	non-Active
P1_CAGCAGCAGGCAAAGA.1	Epithelial cells	0.10132	non-Active	0.0215952	non-Active
P1_CAGCAGCAGGTGCACA.1	Monocytes	0.212264	non-Active	0.0567181	non-Active
P1_CAGCAGCCAAACCTAC.1	CD8+ T-cells	0.0845406	non-Active	0.0602057	non-Active
P1_CAGCAGCCACGCTTTC.1	Fibroblasts	0.284304	OS-Active	0.325055	Metabolism-Active
P1_CAGCAGCCACGTAAGG.1	CD8+ T-cells	0.110335	non-Active	0.0694709	non-Active
P1_CAGCAGCCAGTATCTG.1	Epithelial cells	0.115211	non-Active	0.0478405	non-Active
P1_CAGCAGCGTCAGAGGT.1	Epithelial cells	0.060453	non-Active	0.0285	non-Active
P1_CAGCAGCGTCGCTTCT.1	Epithelial cells	0.120848	non-Active	0.0421687	non-Active
P1_CAGCAGCGTCTCGTTC.1	Epithelial cells	0.115048	non-Active	0.0871909	non-Active
P1_CAGCAGCTCACCCTCA.1	Epithelial cells	0.128284	non-Active	0	non-Active
P1_CAGCAGCTCTGTACGA.1	Fibroblasts	0.254698	non-Active	0.225358	Metabolism-Active
P1_CAGCATAAGTTGAGTA.1	Epithelial cells	0.0859087	non-Active	0.0214542	non-Active
P1_CAGCATACAAACAACA.1	Macrophages	0.234235	non-Active	0.0430846	non-Active
P1_CAGCATACAGAGTGTG.1	Epithelial cells	0.102489	non-Active	0	non-Active
P1_CAGCATAGTACCCAAT.1	Epithelial cells	0.110219	non-Active	0.0296273	non-Active
P1_CAGCATATCCACGTTC.1	Epithelial cells	0.134061	non-Active	0.0677447	non-Active
P1_CAGCATATCGGCGCTA.1	Epithelial cells	0.104688	non-Active	0.0331501	non-Active
P1_CAGCCGAAGAACTCGG.1	Epithelial cells	0.127232	non-Active	0.0343831	non-Active
P1_CAGCCGAAGAACTGTA.1	Epithelial cells	0.0824476	non-Active	0.0750018	non-Active
P1_CAGCCGAAGGTGTTAA.1	Myofibroblasts	0.226038	non-Active	0.16487	non-Active
P1_CAGCCGACAATAGAGT.1	CD8+ T-cells	0.0793957	non-Active	0.0405834	non-Active
P1_CAGCCGACATAAGACA.1	Epithelial cells	0.206066	non-Active	0.0614387	non-Active
P1_CAGCCGAGTCAAACTC.1	Macrophages	0.171876	non-Active	0.105298	non-Active
P1_CAGCCGAGTGCAGTAG.1	Epithelial cells	0.281896	OS-Active	0.153879	non-Active
P1_CAGCCGAGTGGGTATG.1	Epithelial cells	0.133382	non-Active	0.0687311	non-Active
P1_CAGCCGATCCCTCTTT.1	Epithelial cells	0.108032	non-Active	0.0494258	non-Active
P1_CAGCCGATCTTCGAGA.1	Epithelial cells	0.134002	non-Active	0.059008	non-Active
P1_CAGCGACAGAGCTGGT.1	Epithelial cells	0.114264	non-Active	0.0683435	non-Active
P1_CAGCGACAGTACACCT.1	Epithelial cells	0.11168	non-Active	0.0447404	non-Active
P1_CAGCGACCAAACGTGG.1	CD8+ T-cells	0.0729178	non-Active	0.00109209	non-Active
P1_CAGCGACCACATTCGA.1	CD8+ T-cells	0.104793	non-Active	0.0376946	non-Active
P1_CAGCGACCATAGAAAC.1	Fibroblasts	0.298886	OS-Active	0.277461	Metabolism-Active
P1_CAGCGACGTGATAAAC.1	Epithelial cells	0.110581	non-Active	0.029275	non-Active
P1_CAGCGACGTTCGCGAC.1	Epithelial cells	0.112125	non-Active	0.0434017	non-Active
P1_CAGCGACTCCTCAATT.1	Macrophages	0.275535	OS-Active	0.0684845	non-Active
P1_CAGCGACTCGTATCAG.1	Epithelial cells	0.121035	non-Active	0.0429085	non-Active
P1_CAGCGACTCTACTATC.1	Epithelial cells	0.103285	non-Active	0.0459381	non-Active
P1_CAGCTAAAGATCGGGT.1	Epithelial cells	0.103787	non-Active	0.0423096	non-Active
P1_CAGCTAAAGCGCTTAT.1	Epithelial cells	0.0713977	non-Active	0.0590784	non-Active
P1_CAGCTAAAGGTCATCT.1	Epithelial cells	0.0869611	non-Active	0.0394913	non-Active
P1_CAGCTAACACTGCCAG.1	Epithelial cells	0.116919	non-Active	0.0376946	non-Active
P1_CAGCTAACAGTGAGTG.1	Epithelial cells	0.106208	non-Active	0.0231804	non-Active
P1_CAGCTAACATACCATG.1	Epithelial cells	0.130728	non-Active	0.0569999	non-Active
P1_CAGCTAACATGGTCTA.1	Epithelial cells	0.157868	non-Active	0.0326569	non-Active
P1_CAGCTAAGTCATTAGC.1	Epithelial cells	0.130752	non-Active	0.0983936	non-Active
P1_CAGCTAAGTTGAGTTC.1	Epithelial cells	0.15464	non-Active	0.0565772	non-Active
P1_CAGCTAATCAGGTTCA.1	B-cells	0.116568	non-Active	0	non-Active
P1_CAGCTAATCGTGTAGT.1	Macrophages	0.270343	OS-Active	0.0392799	non-Active
P1_CAGCTGGAGAAACCAT.1	CD8+ T-cells	0.100291	non-Active	0.0361093	non-Active
P1_CAGCTGGAGACCACGA.1	Epithelial cells	0.121397	non-Active	0.0541464	non-Active
P1_CAGCTGGAGCGCCTCA.1	CD8+ T-cells	0.248886	non-Active	0.10241	non-Active
P1_CAGCTGGAGCGCTTAT.1	CD8+ T-cells	0.120567	non-Active	0.0609455	non-Active
P1_CAGCTGGAGTACTTGC.1	Endothelial cells	0.224179	non-Active	0.0846544	non-Active
P1_CAGCTGGCAGCGATCC.1	Epithelial cells	0.0999404	non-Active	0.0833509	non-Active
P1_CAGCTGGGTACGCACC.1	Epithelial cells	0.0972744	non-Active	0.0509758	non-Active
P1_CAGCTGGGTGAGGGTT.1	Epithelial cells	0.0988763	non-Active	0.0449165	non-Active
P1_CAGCTGGTCAGGTAAA.1	Epithelial cells	0.110008	non-Active	0.104876	non-Active
P1_CAGCTGGTCTGCGTAA.1	Epithelial cells	0.173221	non-Active	0.0437892	non-Active
P1_CAGGTGCAGAGTGAGA.1	Epithelial cells	0.14773	non-Active	0.0810259	non-Active
P1_CAGGTGCAGATATACG.1	Epithelial cells	0.114136	non-Active	0.0615092	non-Active
P1_CAGGTGCCAGGTCGTC.1	Epithelial cells	0.102291	non-Active	0.0181075	non-Active
P1_CAGGTGCGTCCGAACC.1	Endothelial cells	0.245203	non-Active	0.111287	non-Active
P1_CAGGTGCGTTGTCTTT.1	Epithelial cells	0.0754668	non-Active	0.0367082	non-Active
P1_CAGGTGCTCGCATGAT.1	Epithelial cells	0.214099	non-Active	0.143134	non-Active
P1_CAGTAACAGAAACCTA.1	Epithelial cells	0.0958829	non-Active	0.00440358	non-Active
P1_CAGTAACAGAAGGTGA.1	Epithelial cells	0.163936	non-Active	0.0920172	non-Active
P1_CAGTAACAGAATCTCC.1	Epithelial cells	0.147087	non-Active	0.106109	non-Active
P1_CAGTAACAGCCCTAAT.1	Epithelial cells	0.150255	non-Active	0.0152892	non-Active
P1_CAGTAACAGCTTCGCG.1	Monocytes	0.249295	non-Active	0.109314	non-Active
P1_CAGTAACAGTCTCCTC.1	Epithelial cells	0.112288	non-Active	0.0313183	non-Active
P1_CAGTAACGTACAGTGG.1	Epithelial cells	0.113832	non-Active	0.0374128	non-Active
P1_CAGTAACGTAGCGTCC.1	CD8+ T-cells	0.109517	non-Active	0.00891284	non-Active
P1_CAGTAACGTCTAAAGA.1	Endothelial cells	0.10919	non-Active	0.0758825	non-Active
P1_CAGTAACGTTGGTTTG.1	Epithelial cells	0.121467	non-Active	0	non-Active
P1_CAGTAACTCACTGGGC.1	Epithelial cells	0.101963	non-Active	0.0138801	non-Active
P1_CAGTAACTCACTTCAT.1	Epithelial cells	0.237567	non-Active	0.0629536	non-Active
P1_CAGTAACTCCGAGCCA.1	Epithelial cells	0.150255	non-Active	0.0830691	non-Active
P1_CAGTAACTCTAGCACA.1	Epithelial cells	0.138352	non-Active	0.041605	non-Active
P1_CAGTAACTCTCCGGTT.1	Epithelial cells	0.20547	non-Active	0.0398788	non-Active
P1_CAGTCCTAGAAACCGC.1	Epithelial cells	0.0980578	non-Active	0.0775735	non-Active
P1_CATATGGAGAATCTCC.1	Epithelial cells	0.14269	non-Active	0.0544987	non-Active
P1_CATATGGAGAGGTACC.1	Epithelial cells	0.11444	non-Active	0.0554146	non-Active
P1_CATATGGAGCCCAATT.1	Epithelial cells	0.117199	non-Active	0.0385754	non-Active
P1_CATATGGAGGCAATTA.1	Epithelial cells	0.104618	non-Active	0.0456563	non-Active
P1_CATATGGCACAGACAG.1	Epithelial cells	0.14034	non-Active	0.0870147	non-Active
P1_CATATGGCACCGATAT.1	Epithelial cells	0.101893	non-Active	0	non-Active
P1_CATATGGGTCGTTGTA.1	Epithelial cells	0.118719	non-Active	0.0432255	non-Active
P1_CATATGGTCAGTTAGC.1	Epithelial cells	0.110371	non-Active	0.0120834	non-Active
P1_CATATGGTCCCAGGTG.1	Epithelial cells	0.0854995	non-Active	0.0740506	non-Active
P1_CATATGGTCTGATTCT.1	Epithelial cells	0.145356	non-Active	0	non-Active
P1_CATATTCAGATAGTCA.1	Epithelial cells	0.0892997	non-Active	0.0203269	non-Active
P1_CATATTCCAGGATCGA.1	Epithelial cells	0.0941406	non-Active	0	non-Active
P1_CATATTCCATCACGAT.1	Epithelial cells	0.154921	non-Active	0.0391742	non-Active
P1_CATATTCGTACACCGC.1	Epithelial cells	0.121116	non-Active	0	non-Active
P1_CATATTCGTCCATCCT.1	Epithelial cells	0.0843068	non-Active	0	non-Active
P1_CATATTCGTCTTCTCG.1	Epithelial cells	0.137837	non-Active	0.00193757	non-Active
P1_CATATTCGTGATGTCT.1	Epithelial cells	0.101601	non-Active	0.026809	non-Active
P1_CATATTCTCAAGCCTA.1	Epithelial cells	0.121584	non-Active	0.0694709	non-Active
P1_CATCAAGAGCCCAACC.1	Epithelial cells	0.151436	non-Active	0.0609455	non-Active
P1_CATCAAGCAAACAACA.1	Epithelial cells	0.159855	non-Active	0	non-Active
P1_CATCAAGCAACTGCTA.1	Epithelial cells	0.10726	non-Active	0.0615444	non-Active
P1_CATCAAGGTAGAAAGG.1	Epithelial cells	0.11244	non-Active	0.117417	non-Active
P1_CATCAAGGTGATAAAC.1	Epithelial cells	0.0944329	non-Active	0.0171916	non-Active
P1_CATCAAGTCAAGGCTT.1	Epithelial cells	0.128565	non-Active	0.049003	non-Active
P1_CATCAAGTCAAGGTAA.1	Epithelial cells	0.116708	non-Active	0.0454449	non-Active
P1_CATCAAGTCGTCTGCT.1	Epithelial cells	0.0769519	non-Active	0.00317058	non-Active
P1_CATCAAGTCTTGAGAC.1	Endothelial cells	0.239368	non-Active	0.0774325	non-Active
P1_CATCAGAAGCGCCTTG.1	Epithelial cells	0.100502	non-Active	0.0637638	non-Active
P1_CATCAGAAGGCTAGGT.1	Epithelial cells	0.0832076	non-Active	0.0826111	non-Active
P1_CATCAGAAGGTGCAAC.1	Epithelial cells	0.0672817	non-Active	0	non-Active
P1_CATCAGACACTTACGA.1	Epithelial cells	0.121818	non-Active	0.0649264	non-Active
P1_CATCAGATCTGCCCTA.1	Macrophages	0.158008	non-Active	0.0517509	non-Active
P1_CATCAGATCTTAGAGC.1	Epithelial cells	0.240912	non-Active	0.101705	non-Active
P1_CATCCACAGGCTAGAC.1	Epithelial cells	0.185253	non-Active	0.0916649	non-Active
P1_CATCCACAGGCTAGGT.1	CD8+ T-cells	0.116615	non-Active	0.0687311	non-Active
P1_CATCCACCAAAGCGGT.1	Epithelial cells	0.104314	non-Active	0.0766575	non-Active
P1_CATCCACTCACTTCAT.1	Epithelial cells	0.196677	non-Active	0.0725005	non-Active
P1_CATCCACTCTCCTATA.1	Epithelial cells	0.149402	non-Active	0.00588318	non-Active
P1_CATCGAAAGCCCAGCT.1	Fibroblasts	0.294992	OS-Active	0.200028	Metabolism-Active
P1_CATCGAACATGATCCA.1	Epithelial cells	0.085441	non-Active	0	non-Active
P1_CATCGAACATGGATGG.1	CD8+ T-cells	0.130892	non-Active	0.0361446	non-Active
P1_CATCGAACATTCTTAC.1	Epithelial cells	0.103402	non-Active	0	non-Active
P1_CATCGAAGTATCGCAT.1	Fibroblasts	0.172016	non-Active	0.157683	non-Active
P1_CATCGAAGTCATTAGC.1	Epithelial cells	0.19601	non-Active	0.0472064	non-Active
P1_CATCGAAGTGTGTGCC.1	Epithelial cells	0.0975082	non-Active	0.0643979	non-Active
P1_CATCGAATCAACCAAC.1	Epithelial cells	0.141112	non-Active	0	non-Active
P1_CATCGAATCACGACTA.1	Epithelial cells	0.109119	non-Active	0.057775	non-Active
P1_CATCGAATCGCCCTTA.1	Myofibroblasts	0.165059	non-Active	0.0671105	non-Active
P1_CATCGAATCTTGGGTA.1	Epithelial cells	0.084868	non-Active	0	non-Active
P1_CATCGGGAGCACCGCT.1	CD8+ T-cells	0.0770922	non-Active	0.0705277	non-Active
P1_CATCGGGAGCTCTCGG.1	CD8+ T-cells	0.0917786	non-Active	0.0956105	non-Active
P1_CATCGGGCAATGGAGC.1	Epithelial cells	0.196841	non-Active	0.0682731	non-Active
P1_CATCGGGCACATCCGG.1	Epithelial cells	0.0950644	non-Active	0.0250828	non-Active
P1_CATCGGGCAGCTTAAC.1	Epithelial cells	0.14621	non-Active	0.0438244	non-Active
P1_CATGACAAGTGGAGTC.1	B-cells	0.119175	non-Active	0.0911365	non-Active
P1_CATGACAAGTTTCCTT.1	Epithelial cells	0.155997	non-Active	0.0299091	non-Active
P1_CATGACACAACTGCGC.1	Monocytes	0.159633	non-Active	0.095223	non-Active
P1_CATGACACACACGCTG.1	Epithelial cells	0.0957426	non-Active	0.0149017	non-Active
P1_CATGACAGTATAAACG.1	Fibroblasts	0.196338	non-Active	0.247869	Metabolism-Active
P1_CATGACAGTCGGCATC.1	Epithelial cells	0.121701	non-Active	0.109984	non-Active
P1_CATGACATCAGAAATG.1	Epithelial cells	0.224027	non-Active	0.0643275	non-Active
P1_CATGCCTAGACACTAA.1	Epithelial cells	0.11879	non-Active	0.0373071	non-Active
P1_CATGCCTAGAGACTAT.1	Epithelial cells	0.0942926	non-Active	0.0377651	non-Active
P1_CATGCCTAGATATGCA.1	CD8+ T-cells	0.12031	non-Active	0.0889523	non-Active
P1_CATGCCTAGCGAGAAA.1	Epithelial cells	0.127244	non-Active	0.0373071	non-Active
P1_CATGCCTAGCTCCCAG.1	Epithelial cells	0.155541	non-Active	0.0657719	non-Active
P1_CATGCCTAGGATGGTC.1	Epithelial cells	0.20768	non-Active	0.0738744	non-Active
P1_CATGCCTCAAGAGTCG.1	Epithelial cells	0.112534	non-Active	0.0590432	non-Active
P1_CATGCCTGTGCACCAC.1	Monocytes	0.169081	non-Active	0.0998027	non-Active
P1_CATGCCTGTTGGAGGT.1	Epithelial cells	0.135522	non-Active	0.0476291	non-Active
P1_CATGCCTTCCCTCAGT.1	Epithelial cells	0.0892763	non-Active	0.0334672	non-Active
P1_CATGCCTTCCTGCAGG.1	Epithelial cells	0.101262	non-Active	0.0154301	non-Active
P1_CATGCCTTCCTTGGTC.1	Epithelial cells	0.117796	non-Active	0	non-Active
P1_CATGGCGAGGAGTTTA.1	Epithelial cells	0.0935326	non-Active	0.0397379	non-Active
P1_CATGGCGAGGTGATAT.1	Epithelial cells	0.0832427	non-Active	0.0253294	non-Active
P1_CATGGCGCAGCTCCGA.1	Epithelial cells	0.0936495	non-Active	0.0464666	non-Active
P1_CATGGCGGTTTCGCTC.1	Epithelial cells	0.1065	non-Active	0.0414993	non-Active
P1_CATGGCGTCTGCGTAA.1	Epithelial cells	0.112206	non-Active	0.0257169	non-Active
P1_CATTATCAGAGCTGCA.1	B-cells	0.149297	non-Active	0.0785246	non-Active
P1_CATTATCCAACGCACC.1	Epithelial cells	0.181955	non-Active	0.0444585	non-Active
P1_CATTATCCACCAGATT.1	Epithelial cells	0.106231	non-Active	0.0426619	non-Active
P1_CATTATCCATAGAAAC.1	Endothelial cells	0.212486	non-Active	0.0508701	non-Active
P1_CATTATCGTAAGTGTA.1	Myofibroblasts	0.187194	non-Active	0.101881	non-Active
P1_CATTATCGTATCGCAT.1	Epithelial cells	0.0482338	non-Active	0.0154654	non-Active
P1_CATTATCGTTAGATGA.1	Epithelial cells	0.152501	non-Active	0.0582682	non-Active
P1_CATTATCTCTATGTGG.1	Epithelial cells	0.112008	non-Active	0.0317058	non-Active
P1_CATTCGCAGAGTGAGA.1	Epithelial cells	0.141661	non-Active	0.049461	non-Active
P1_CATTCGCAGATGCCTT.1	Epithelial cells	0.154629	non-Active	0.00380469	non-Active
P1_CATTCGCAGTACGACG.1	Epithelial cells	0.108921	non-Active	0.0509758	non-Active
P1_CATTCGCCAACTGCTA.1	Macrophages	0.306428	OS-Active	0.0893046	non-Active
P1_CATTCGCCACCAGTTA.1	Epithelial cells	0.134423	non-Active	0.0333615	non-Active
P1_CATTCGCCACGGACAA.1	Epithelial cells	0.116451	non-Active	0.0454449	non-Active
P1_CATTCGCCAGGAATCG.1	CD8+ T-cells	0.0717251	non-Active	0.00387515	non-Active
P1_CATTCGCCAGTCTTCC.1	Epithelial cells	0.10567	non-Active	0.0309307	non-Active
P1_CATTCGCGTTACTGAC.1	Myofibroblasts	0.173209	non-Active	0.0537237	non-Active
P1_CCAATCCAGATCCCAT.1	Epithelial cells	0.142643	non-Active	0.0670753	non-Active
P1_CCAATCCCATCGATGT.1	Monocytes	0.171315	non-Active	0.10248	non-Active
P1_CCAATCCCATTAACCG.1	Monocytes	0.190573	non-Active	0.106461	non-Active
P1_CCAATCCGTCTGCCAG.1	CD8+ T-cells	0.117047	non-Active	0.0384344	non-Active
P1_CCAATCCGTGATAAGT.1	Epithelial cells	0.187545	non-Active	0.0997675	non-Active
P1_CCACCTAAGAGGTACC.1	Epithelial cells	0.0827867	non-Active	0.0988515	non-Active
P1_CCACCTAAGCCCAATT.1	Epithelial cells	0.120134	non-Active	0.0593602	non-Active
P1_CCACCTAGTAGCGTCC.1	Epithelial cells	0.0846926	non-Active	0.0791587	non-Active
P1_CCACCTAGTAGTACCT.1	Epithelial cells	0.120906	non-Active	0.0746495	non-Active
P1_CCACCTAGTCTGGTCG.1	Epithelial cells	0.125045	non-Active	0.0740154	non-Active
P1_CCACCTAGTTTACTCT.1	Epithelial cells	0.140305	non-Active	0.0775382	non-Active
P1_CCACCTATCCGCAGTG.1	Epithelial cells	0.116919	non-Active	0.00440358	non-Active
P1_CCACCTATCCTTGGTC.1	Epithelial cells	0.0758878	non-Active	0.0377651	non-Active
P1_CCACCTATCGGACAAG.1	CD8+ T-cells	0.0998585	non-Active	0.0244487	non-Active
P1_CCACGGAAGCTAGCCC.1	Epithelial cells	0.0929596	non-Active	0.0298034	non-Active
P1_CCACGGACACAACGCC.1	Epithelial cells	0.124461	non-Active	0.0163461	non-Active
P1_CCACGGACAGGATCGA.1	CD8+ T-cells	0.1036	non-Active	0.0593955	non-Active
P1_CCACGGAGTTCCTCCA.1	Epithelial cells	0.184083	non-Active	0	non-Active
P1_CCACGGATCACAACGT.1	Epithelial cells	0.106383	non-Active	0.0307546	non-Active
P1_CCACGGATCCGAACGC.1	Epithelial cells	0.123362	non-Active	0.0757768	non-Active
P1_CCACGGATCTTACCGC.1	Epithelial cells	0.101484	non-Active	0.00746847	non-Active
P1_CCACTACAGACTGGGT.1	B-cells	0.141848	non-Active	0.10787	non-Active
P1_CCACTACAGCTAGTCT.1	Epithelial cells	0.149098	non-Active	0.0866272	non-Active
P1_CCACTACAGGCGACAT.1	Epithelial cells	0.155038	non-Active	0.0657014	non-Active
P1_CCACTACAGGGCTCTC.1	Monocytes	0.129208	non-Active	0.0535828	non-Active
P1_CCACTACCAAGCGTAG.1	CD8+ T-cells	0.125373	non-Active	0.0765166	non-Active
P1_CCACTACCAGCGATCC.1	Epithelial cells	0.128097	non-Active	0.0353343	non-Active
P1_CCACTACGTACCGCTG.1	Epithelial cells	0.0998585	non-Active	0.0381174	non-Active
P1_CCACTACGTATTACCG.1	Epithelial cells	0.140024	non-Active	0.0733812	non-Active
P1_CCACTACTCACCCTCA.1	Epithelial cells	0.152781	non-Active	0.0431551	non-Active
P1_CCAGCGAAGGGCTTCC.1	Epithelial cells	0.225898	non-Active	0.0712323	non-Active
P1_CCAGCGAAGTTCCACA.1	CD8+ T-cells	0.145075	non-Active	0.0309307	non-Active
P1_CCAGCGACAGACGCTC.1	Epithelial cells	0.153705	non-Active	0.0614035	non-Active
P1_CCAGCGAGTCGGCATC.1	Epithelial cells	0.167082	non-Active	0.0758472	non-Active
P1_CCAGCGATCAGGCGAA.1	Monocytes	0.143836	non-Active	0	non-Active
P1_CCATGTCCAAGAGTCG.1	Epithelial cells	0.0921645	non-Active	0.0751074	non-Active
P1_CCATGTCCACAAGCCC.1	Epithelial cells	0.0922463	non-Active	0.0791235	non-Active
P1_CCATGTCCACTTACGA.1	Epithelial cells	0.145426	non-Active	0.0509758	non-Active
P1_CCATGTCCAGCCTATA.1	Macrophages	0.200278	non-Active	0.0754597	non-Active
P1_CCATGTCGTCCGACGT.1	Epithelial cells	0.0600203	non-Active	0.0242373	non-Active
P1_CCATGTCGTCTTCTCG.1	Epithelial cells	0.240619	non-Active	0.131685	non-Active
P1_CCATGTCGTGGTCTCG.1	Epithelial cells	0.153635	non-Active	0.0134926	non-Active
P1_CCATGTCGTTACCAGT.1	Epithelial cells	0.0890308	non-Active	0.0296273	non-Active
P1_CCATGTCGTTGGTAAA.1	Epithelial cells	0.109844	non-Active	0.0473825	non-Active
P1_CCATGTCTCCAATGGT.1	Epithelial cells	0.10422	non-Active	0.0232509	non-Active
P1_CCATGTCTCCCAAGAT.1	Epithelial cells	0.110792	non-Active	0	non-Active
P1_CCATGTCTCTAACTGG.1	Epithelial cells	0.106348	non-Active	0.0730994	non-Active
P1_CCATTCGAGACACGAC.1	Epithelial cells	0.115714	non-Active	0.038822	non-Active
P1_CCATTCGAGACGCAAC.1	Epithelial cells	0.0978824	non-Active	0.060241	non-Active
P1_CCATTCGAGATGGCGT.1	Epithelial cells	0.105799	non-Active	0	non-Active
P1_CCATTCGAGTATCGAA.1	Epithelial cells	0.07687	non-Active	0	non-Active
P1_CCATTCGAGTCACGCC.1	Epithelial cells	0.226365	non-Active	0.0529839	non-Active
P1_CCATTCGCACGAAAGC.1	Epithelial cells	0.20395	non-Active	0.0617206	non-Active
P1_CCATTCGCAGTCACTA.1	Myofibroblasts	0.281147	OS-Active	0.113331	non-Active
P1_CCATTCGCATGATCCA.1	Epithelial cells	0.155026	non-Active	0.027126	non-Active
P1_CCATTCGCATGCCACG.1	Epithelial cells	0.135288	non-Active	0.171951	non-Active
P1_CCATTCGGTGCCTGTG.1	Epithelial cells	0.105284	non-Active	0.0406186	non-Active
P1_CCATTCGGTTCAGCGC.1	Epithelial cells	0.102513	non-Active	0	non-Active
P1_CCATTCGTCCAAAGTC.1	Monocytes	0.137265	non-Active	0.0603819	non-Active
P1_CCATTCGTCGAACGGA.1	Epithelial cells	0.122777	non-Active	0.0811315	non-Active
P1_CCCAATCAGAATCTCC.1	Epithelial cells	0.144467	non-Active	0.0943775	non-Active
P1_CCCAATCAGACTCGGA.1	Epithelial cells	0.160709	non-Active	0.0518565	non-Active
P1_CCCAATCAGGTGTGGT.1	Epithelial cells	0.131056	non-Active	0.0370958	non-Active
P1_CCCAATCCAACTTGAC.1	Epithelial cells	0.0967131	non-Active	0.0192701	non-Active
P1_CCCAATCGTTCGGCAC.1	Epithelial cells	0.133792	non-Active	0.106461	non-Active
P1_CCCAATCTCAACACGT.1	Myofibroblasts	0.286912	OS-Active	0.214965	Metabolism-Active
P1_CCCAATCTCCACGACG.1	Fibroblasts	0.163118	non-Active	0.194039	Metabolism-Active
P1_CCCAGTTAGAATGTTG.1	Epithelial cells	0.127372	non-Active	0.0660537	non-Active
P1_CCCAGTTCAGGGTATG.1	Epithelial cells	0.088376	non-Active	0.0549214	non-Active
P1_CCCAGTTCATCCCATC.1	Epithelial cells	0.137335	non-Active	0.0544635	non-Active
P1_CCCAGTTCATGTAGTC.1	Epithelial cells	0.142105	non-Active	0.0644332	non-Active
P1_CCCAGTTCATTGAGCT.1	Epithelial cells	0.138574	non-Active	0.0055309	non-Active
P1_CCCAGTTGTCAGAAGC.1	Epithelial cells	0.0863998	non-Active	0.0827521	non-Active
P1_CCCAGTTTCAGCAACT.1	Epithelial cells	0.0598333	non-Active	0.073346	non-Active
P1_CCCATACAGACTTTCG.1	Epithelial cells	0.0590615	non-Active	0	non-Active
P1_CCCATACAGAGACGAA.1	Epithelial cells	0.214649	non-Active	0.071338	non-Active
P1_CCCATACAGCCAACAG.1	Epithelial cells	0.114229	non-Active	0.0183189	non-Active
P1_CCCATACAGCCCAGCT.1	Epithelial cells	0.102454	non-Active	0.0486507	non-Active
P1_CCCATACAGTGAACGC.1	Epithelial cells	0.075841	non-Active	0.0578454	non-Active
P1_CCCATACAGTTGTAGA.1	Fibroblasts	0.222729	non-Active	0.214331	Metabolism-Active
P1_CCCATACCAAGAAGAG.1	Epithelial cells	0.145204	non-Active	0.0700698	non-Active
P1_CCCATACCAAGCGATG.1	CD8+ T-cells	0.121011	non-Active	0.117558	non-Active
P1_CCCATACCACCGGAAA.1	Epithelial cells	0.211609	non-Active	0.0448461	non-Active
P1_CCCATACCAGTGGGAT.1	Epithelial cells	0.119854	non-Active	0	non-Active
P1_CCCATACCATACAGCT.1	Epithelial cells	0.106781	non-Active	0.0223702	non-Active
P1_CCCTCCTAGATCGATA.1	Epithelial cells	0.113189	non-Active	0.0892694	non-Active
P1_CCCTCCTAGTATTGGA.1	Epithelial cells	0.107985	non-Active	0.0243782	non-Active
P1_CCCTCCTCAATGGACG.1	Epithelial cells	0.0953333	non-Active	0.0203269	non-Active
P1_CCCTCCTCAGACAAGC.1	Epithelial cells	0.170449	non-Active	0.0315649	non-Active
P1_CCCTCCTCAGTATGCT.1	Epithelial cells	0.140047	non-Active	0.0553794	non-Active
P1_CCCTCCTCATAGACTC.1	Epithelial cells	0.128962	non-Active	0.0555908	non-Active
P1_CCCTCCTGTCTAGCCG.1	Epithelial cells	0.130132	non-Active	0.0544282	non-Active
P1_CCCTCCTGTCTCAACA.1	Epithelial cells	0.136411	non-Active	0.0230043	non-Active
P1_CCCTCCTTCGCTAGCG.1	Epithelial cells	0.143064	non-Active	0.0284647	non-Active
P1_CCCTCCTTCTCGAGTA.1	Epithelial cells	0.0807287	non-Active	0.0283943	non-Active
P1_CCCTCCTTCTGGAGCC.1	Epithelial cells	0.0838391	non-Active	0.0698936	non-Active
P1_CCGGGATAGCGTGAAC.1	Epithelial cells	0.119865	non-Active	0.0353343	non-Active
P1_CCGGGATCAAGCGCTC.1	Epithelial cells	0.148654	non-Active	0.0892694	non-Active
P1_CCGGGATCAAGTCTAC.1	Epithelial cells	0.198489	non-Active	0.00648207	non-Active
P1_CCGGGATGTATGAATG.1	Epithelial cells	0.116463	non-Active	0.0728176	non-Active
P1_CCGGGATTCCGCGGTA.1	Epithelial cells	0.0461758	non-Active	0	non-Active
P1_CCGGTAGAGACTTTCG.1	Epithelial cells	0.0977187	non-Active	0.000457972	non-Active
P1_CCGGTAGAGCTCCTTC.1	Epithelial cells	0.0986541	non-Active	0.0673219	non-Active
P1_CCGGTAGAGGCCCGTT.1	Epithelial cells	0.192771	non-Active	0.0895864	non-Active
P1_CCGGTAGAGGTCGGAT.1	Myofibroblasts	0.213772	non-Active	0.115937	non-Active
P1_CCGGTAGCACTATCTT.1	Epithelial cells	0.170765	non-Active	0.0345945	non-Active
P1_CCGGTAGCATGGATGG.1	Epithelial cells	0.177664	non-Active	0.0956457	non-Active
P1_CCGGTAGGTCCAGTAT.1	Epithelial cells	0.0829972	non-Active	0.0243782	non-Active
P1_CCGGTAGTCGGAGCAA.1	Epithelial cells	0.119561	non-Active	0.00711618	non-Active
P1_CCGGTAGTCGTTTGCC.1	Epithelial cells	0.255212	non-Active	0.243007	Metabolism-Active
P1_CCGTACTAGAATCTCC.1	Epithelial cells	0.0815823	non-Active	0.0171211	non-Active
P1_CCGTACTAGGACAGAA.1	Epithelial cells	0.120158	non-Active	0	non-Active
P1_CCGTACTAGTCATCCA.1	Epithelial cells	0.0829738	non-Active	0.0143028	non-Active
P1_CCGTACTCACACCGAC.1	Epithelial cells	0.0912057	non-Active	0.0438596	non-Active
P1_CCGTACTCACATCCAA.1	Epithelial cells	0.131114	non-Active	0.103819	non-Active
P1_CCGTACTCAGCTCCGA.1	Epithelial cells	0.119444	non-Active	0.0302614	non-Active
P1_CCGTACTCATTTGCTT.1	Macrophages	0.173653	non-Active	0.235503	Metabolism-Active
P1_CCGTACTTCAAGCCTA.1	CD8+ T-cells	0.0736895	non-Active	0.0313183	non-Active
P1_CCGTGGACAAAGGTGC.1	Epithelial cells	0.095801	non-Active	0.0657014	non-Active
P1_CCGTGGACAATAGCAA.1	Epithelial cells	0.214403	non-Active	0.0341718	non-Active
P1_CCGTGGAGTAACGACG.1	Epithelial cells	0.141883	non-Active	0.0450574	non-Active
P1_CCGTGGATCGTTTAGG.1	Epithelial cells	0.0972744	non-Active	0.0796872	non-Active
P1_CCGTTCAAGAAACCTA.1	Fibroblasts	0.236398	non-Active	0.352357	Metabolism-Active
P1_CCGTTCAAGCGTTTAC.1	Epithelial cells	0.122414	non-Active	0.0280068	non-Active
P1_CCGTTCAAGCTAGTCT.1	CD8+ T-cells	0.0810093	non-Active	0.0130698	non-Active
P1_CCGTTCACATTAGCCA.1	Epithelial cells	0.106325	non-Active	0.0417107	non-Active
P1_CCGTTCAGTAGAGCTG.1	Epithelial cells	0.11879	non-Active	0.0130698	non-Active
P1_CCGTTCAGTATGAAAC.1	Epithelial cells	0.121724	non-Active	0.0656662	non-Active
P1_CCGTTCAGTCCGACGT.1	Monocytes	0.188012	non-Active	0.0122948	non-Active
P1_CCGTTCAGTCCTCTTG.1	Epithelial cells	0.147285	non-Active	0	non-Active
P1_CCGTTCAGTGGTACAG.1	Endothelial cells	0.228716	non-Active	0.127316	non-Active
P1_CCTAAAGAGTGGAGTC.1	Epithelial cells	0.10712	non-Active	0.0209963	non-Active
P1_CCTAAAGCACAAGACG.1	Fibroblasts	0.168707	non-Active	0.23885	Metabolism-Active
P1_CCTAAAGCAGTTCATG.1	Epithelial cells	0.13233	non-Active	0.133129	non-Active
P1_CCTAAAGGTAGCGCAA.1	Epithelial cells	0.0904222	non-Active	0.0237089	non-Active
P1_CCTAAAGGTTGCGTTA.1	Epithelial cells	0.150337	non-Active	0.022335	non-Active
P1_CCTACACAGGTGATTA.1	Epithelial cells	0.0889606	non-Active	0.0117664	non-Active
P1_CCTACACCAAGGACAC.1	Macrophages	0.174179	non-Active	0.0222997	non-Active
P1_CCTACACCACATGTGT.1	B-cells	0.128892	non-Active	0.0680265	non-Active
P1_CCTACACGTAAAGGAG.1	Epithelial cells	0.126612	non-Active	0.0590432	non-Active
P1_CCTACACTCCAAACTG.1	Epithelial cells	0.154465	non-Active	0.0764461	non-Active
P1_CCTACACTCGCCATAA.1	Epithelial cells	0.208487	non-Active	0.0648911	non-Active
P1_CCTACCAAGAATGTTG.1	CD8+ T-cells	0.0960466	non-Active	0.0152892	non-Active
P1_CCTACCAAGCTAAACA.1	CD8+ T-cells	0.0983501	non-Active	0	non-Active
P1_CCTACCAAGTTCGCGC.1	Epithelial cells	0.101203	non-Active	0.0855351	non-Active
P1_CCTACCACAAGACGTG.1	Epithelial cells	0.135674	non-Active	0.037448	non-Active
P1_CCTACCACACATCCAA.1	Epithelial cells	0.245051	non-Active	0.1394	non-Active
P1_CCTACCACACGAGAGT.1	Endothelial cells	0.172297	non-Active	0.122948	non-Active
P1_CCTACCACATCCTAGA.1	Epithelial cells	0.0708832	non-Active	0.0351582	non-Active
P1_CCTACCAGTCCATCCT.1	Epithelial cells	0.101987	non-Active	0.0403016	non-Active
P1_CCTACCAGTGCAGTAG.1	CD8+ T-cells	0.11313	non-Active	0.0851124	non-Active
P1_CCTACCAGTTCGTTGA.1	Epithelial cells	0.114779	non-Active	0.0269851	non-Active
P1_CCTACCAGTTTCCACC.1	Epithelial cells	0.168041	non-Active	0.0687311	non-Active
P1_CCTACCATCCAAGCCG.1	Epithelial cells	0.227687	non-Active	0.118967	non-Active
P1_CCTAGCTAGGCCCTTG.1	Epithelial cells	0.255142	non-Active	0.00757416	non-Active
P1_CCTAGCTGTCAGAAGC.1	B-cells	0.207832	non-Active	0.0555556	non-Active
P1_CCTAGCTGTGTGCGTC.1	Epithelial cells	0.0898025	non-Active	0.0187769	non-Active
P1_CCTAGCTGTTTACTCT.1	Epithelial cells	0.110897	non-Active	0.0222997	non-Active
P1_CCTAGCTTCACCTTAT.1	CD8+ T-cells	0.187252	non-Active	0.0162052	non-Active
P1_CCTAGCTTCATTGCCC.1	Fibroblasts	0.230996	non-Active	0.267421	Metabolism-Active
P1_CCTAGCTTCCGTACAA.1	Epithelial cells	0.145999	non-Active	0.0978651	non-Active
P1_CCTATTAAGCGTGAAC.1	Epithelial cells	0.188024	non-Active	0.0406891	non-Active
P1_CCTATTATCAGCTTAG.1	B-cells	0.0959647	non-Active	0	non-Active
P1_CCTATTATCTAACGGT.1	Epithelial cells	0.196314	non-Active	0.0405834	non-Active
P1_CCTATTATCTTGGGTA.1	Epithelial cells	0.0798167	non-Active	0.0554146	non-Active
P1_CCTCAGTAGACCTTTG.1	Epithelial cells	0.113972	non-Active	0.0301909	non-Active
P1_CCTCAGTAGACGCACA.1	CD8+ T-cells	0.135312	non-Active	0.0433312	non-Active
P1_CCTCAGTAGACTAAGT.1	Monocytes	0.196934	non-Active	0.0759882	non-Active
P1_CCTCAGTAGTTGTAGA.1	Monocytes	0.179102	non-Active	0.0781371	non-Active
P1_CCTCAGTCATTAACCG.1	Epithelial cells	0.0965494	non-Active	0.014796	non-Active
P1_CCTCAGTGTCGGATCC.1	Epithelial cells	0.105214	non-Active	0.0843021	non-Active
P1_CCTCAGTGTCTCCACT.1	CD8+ T-cells	0.145344	non-Active	0.0577397	non-Active
P1_CCTCAGTGTCTCTCGT.1	Epithelial cells	0.167947	non-Active	0.0730994	non-Active
P1_CCTCAGTGTTCGGGCT.1	Myofibroblasts	0.133967	non-Active	0.0527373	non-Active
P1_CCTCAGTTCACCATAG.1	Epithelial cells	0.123116	non-Active	0.0564715	non-Active
P1_CCTCTGAAGATCTGCT.1	Epithelial cells	0.100665	non-Active	0.0153597	non-Active
P1_CCTCTGACACTTGGAT.1	Epithelial cells	0.0790449	non-Active	0.0316353	non-Active
P1_CCTCTGAGTGAACCTT.1	Endothelial cells	0.204301	non-Active	0.114246	non-Active
P1_CCTCTGATCTCCAACC.1	CD8+ T-cells	0.116392	non-Active	0.022652	non-Active
P1_CCTTACGAGAAACCGC.1	Epithelial cells	0.107026	non-Active	0.0238146	non-Active
P1_CCTTACGCACGACGAA.1	Epithelial cells	0.137206	non-Active	0.0835975	non-Active
P1_CCTTACGCACTGTCGG.1	B-cells	0.134224	non-Active	0.107729	non-Active
P1_CCTTACGCAGTATCTG.1	Fibroblasts	0.254265	non-Active	0.272881	Metabolism-Active
P1_CCTTACGGTATATGGA.1	Epithelial cells	0.0862712	non-Active	0.0284647	non-Active
P1_CCTTACGTCCAAAGTC.1	Epithelial cells	0.0944446	non-Active	0.00165575	non-Active
P1_CCTTCCCAGTCGTACT.1	Epithelial cells	0.108523	non-Active	0.0591841	non-Active
P1_CCTTCCCCAACTGGCC.1	Epithelial cells	0.187334	non-Active	0.0316001	non-Active
P1_CCTTCCCCAAGTTAAG.1	Epithelial cells	0.0980461	non-Active	0.0435074	non-Active
P1_CCTTCCCCACCTCGGA.1	Monocytes	0.159388	non-Active	0	non-Active
P1_CCTTCCCCACGGTAAG.1	Epithelial cells	0.248606	non-Active	0.0180371	non-Active
P1_CCTTCCCCATGACGGA.1	Fibroblasts	0.201062	non-Active	0.11703	non-Active
P1_CCTTCCCGTACAGACG.1	Epithelial cells	0.114627	non-Active	0.0350173	non-Active
P1_CCTTCCCTCCTTGCCA.1	Epithelial cells	0.101379	non-Active	0.0221236	non-Active
P1_CCTTCCCTCGCTTGTC.1	Epithelial cells	0.184843	non-Active	0.0974776	non-Active
P1_CCTTCGAAGCTAAGAT.1	Macrophages	0.204289	non-Active	0.0990629	non-Active
P1_CCTTCGAAGGCAGTCA.1	CD8+ T-cells	0.107401	non-Active	0.0653491	non-Active
P1_CCTTCGAAGGGTTCCC.1	Epithelial cells	0.1094	non-Active	0.0345945	non-Active
P1_CCTTCGAAGTCGATAA.1	Epithelial cells	0.182271	non-Active	0.0510463	non-Active
P1_CCTTCGAGTATCGCAT.1	Epithelial cells	0.175244	non-Active	0.0407595	non-Active
P1_CCTTCGAGTGATGATA.1	CD8+ T-cells	0.12653	non-Active	0.0471711	non-Active
P1_CCTTCGAGTGGCTCCA.1	Epithelial cells	0.0900598	non-Active	0	non-Active
P1_CCTTCGAGTGTTAAGA.1	Epithelial cells	0.113937	non-Active	0.0538998	non-Active
P1_CCTTTCTAGTCGTACT.1	Epithelial cells	0.131909	non-Active	0.0472768	non-Active
P1_CCTTTCTCAAGTCTAC.1	Epithelial cells	0.118638	non-Active	0.0390333	non-Active
P1_CCTTTCTCACAAGCCC.1	Epithelial cells	0.143626	non-Active	0.048228	non-Active
P1_CCTTTCTCACAGAGGT.1	Epithelial cells	0.145929	non-Active	0.0493201	non-Active
P1_CCTTTCTCAGAAGCAC.1	Epithelial cells	0.101203	non-Active	0.0337138	non-Active
P1_CCTTTCTGTGAAAGAG.1	Epithelial cells	0.07169	non-Active	0.0259283	non-Active
P1_CGAACATAGTCCAGGA.1	Fibroblasts	0.145648	non-Active	0.116114	non-Active
P1_CGAACATCAAGTACCT.1	Epithelial cells	0.126659	non-Active	0.0368139	non-Active
P1_CGAACATGTTTGTGTG.1	Epithelial cells	0.139206	non-Active	0.064715	non-Active
P1_CGAACATTCTTAGAGC.1	CD8+ T-cells	0.119327	non-Active	0.0423448	non-Active
P1_CGAACATTCTTGTATC.1	Epithelial cells	0.126495	non-Active	0.0847953	non-Active
P1_CGAATGTAGAGATGAG.1	Epithelial cells	0.137849	non-Active	0.0305785	non-Active
P1_CGAATGTCAATAGCGG.1	Epithelial cells	0.0731165	non-Active	0.0860636	non-Active
P1_CGAATGTCATACTACG.1	Epithelial cells	0.242853	non-Active	0.0727119	non-Active
P1_CGAATGTTCTAACTGG.1	Epithelial cells	0.101589	non-Active	0.0449165	non-Active
P1_CGAATGTTCTTTAGGG.1	Epithelial cells	0.11154	non-Active	0.0231804	non-Active
P1_CGACCTTGTCACAAGG.1	Epithelial cells	0.107868	non-Active	0.0270204	non-Active
P1_CGACCTTGTGGACGAT.1	Fibroblasts	0.326715	OS-Active	0.29201	Metabolism-Active
P1_CGACCTTGTTCCACGG.1	Epithelial cells	0.131839	non-Active	0.0216304	non-Active
P1_CGACTTCAGCACCGCT.1	Epithelial cells	0.208709	non-Active	0.0876841	non-Active
P1_CGACTTCAGCCTCGTG.1	Epithelial cells	0.154617	non-Active	0.0307546	non-Active
P1_CGACTTCAGCTGAAAT.1	Epithelial cells	0.149636	non-Active	0.0894455	non-Active
P1_CGACTTCCAAGTCTGT.1	CD8+ T-cells	0.0978239	non-Active	0.0175791	non-Active
P1_CGACTTCCACAACGCC.1	Epithelial cells	0.218063	non-Active	0.0740154	non-Active
P1_CGACTTCGTATATGGA.1	Endothelial cells	0.30679	OS-Active	0.159304	non-Active
P1_CGACTTCGTCATATCG.1	Epithelial cells	0.0934507	non-Active	0.0180018	non-Active
P1_CGACTTCTCCTATTCA.1	Epithelial cells	0.106278	non-Active	0.0364616	non-Active
P1_CGACTTCTCTCTAAGG.1	Macrophages	0.345669	OS-Active	0.0646445	non-Active
P1_CGAGAAGAGACTACAA.1	CD8+ T-cells	0.107424	non-Active	0.080744	non-Active
P1_CGAGAAGAGTCTCGGC.1	Epithelial cells	0.089744	non-Active	0.0147608	non-Active
P1_CGAGAAGCACGGTAGA.1	CD8+ T-cells	0.117573	non-Active	0.0414641	non-Active
P1_CGAGAAGGTGTCGCTG.1	CD8+ T-cells	0.132739	non-Active	0.0603819	non-Active
P1_CGAGAAGTCAGAGCTT.1	Epithelial cells	0.127372	non-Active	0.0230043	non-Active
P1_CGAGAAGTCAGCTCTC.1	Epithelial cells	0.140901	non-Active	0.126083	non-Active
P1_CGAGAAGTCCTGTAGA.1	Epithelial cells	0.123139	non-Active	0.0278306	non-Active
P1_CGAGAAGTCGCCAAAT.1	CD8+ T-cells	0.0680652	non-Active	0.00753893	non-Active
P1_CGAGAAGTCGTAGGTT.1	Endothelial cells	0.258779	OS-Active	0.0891989	non-Active
P1_CGAGAAGTCTGCCAGG.1	Epithelial cells	0.0998585	non-Active	0.050236	non-Active
P1_CGAGAAGTCTTGAGGT.1	Epithelial cells	0.108266	non-Active	0.0568238	non-Active
P1_CGAGCACCAAGTAGTA.1	Epithelial cells	0.0943277	non-Active	0.00944127	non-Active
P1_CGAGCACCATATGGTC.1	Epithelial cells	0.116369	non-Active	0	non-Active
P1_CGAGCACGTTAAGACA.1	B-cells	0.16251	non-Active	0.0441415	non-Active
P1_CGAGCACTCCCTGACT.1	Epithelial cells	0.0769752	non-Active	0.0431903	non-Active
P1_CGAGCCAAGGTCATCT.1	Epithelial cells	0.0912992	non-Active	0.0301909	non-Active
P1_CGAGCCACAAACCCAT.1	Epithelial cells	0.219689	non-Active	0.105721	non-Active
P1_CGAGCCACAAGAAGAG.1	Epithelial cells	0.0924217	non-Active	0.0620024	non-Active
P1_CGAGCCACACGGCCAT.1	Epithelial cells	0.097099	non-Active	0.0306137	non-Active
P1_CGAGCCAGTCATTAGC.1	CD8+ T-cells	0.0818162	non-Active	0.0259635	non-Active
P1_CGAGCCAGTCCTAGCG.1	Epithelial cells	0.132891	non-Active	0.0123653	non-Active
P1_CGAGCCATCAACACAC.1	Epithelial cells	0.162089	non-Active	0.0591841	non-Active
P1_CGAGCCATCAGCTCGG.1	Epithelial cells	0.0773845	non-Active	0.0366378	non-Active
P1_CGATCGGAGACAATAC.1	Epithelial cells	0.100993	non-Active	0.0426619	non-Active
P1_CGATCGGCAGCATACT.1	Epithelial cells	0.172893	non-Active	0.103149	non-Active
P1_CGATCGGCAGGTGGAT.1	Epithelial cells	0.122777	non-Active	0.0484746	non-Active
P1_CGATCGGCATCGTCGG.1	Monocytes	0.142632	non-Active	0.0778553	non-Active
P1_CGATCGGCATGGGAAC.1	CD8+ T-cells	0.103027	non-Active	0.0571056	non-Active
P1_CGATCGGGTACCGTTA.1	Epithelial cells	0.110862	non-Active	0.0131051	non-Active
P1_CGATCGGTCACCCTCA.1	Epithelial cells	0.265093	OS-Active	0.142183	non-Active
P1_CGATCGGTCCCTGACT.1	Endothelial cells	0.302534	OS-Active	0.187592	Metabolism-Active
P1_CGATCGGTCCTTGCCA.1	Macrophages	0.238877	non-Active	0.164165	non-Active
P1_CGATGGCAGGAGCGTT.1	Epithelial cells	0.14428	non-Active	0.0601705	non-Active
P1_CGATGGCGTAGTACCT.1	CD8+ T-cells	0.0823774	non-Active	0.0299796	non-Active
P1_CGATGGCGTCATTAGC.1	Fibroblasts	0.240572	non-Active	0.332629	Metabolism-Active
P1_CGATGGCGTCTAGGTT.1	Epithelial cells	0.216415	non-Active	0.0631297	non-Active
P1_CGATGGCGTGGCGAAT.1	Epithelial cells	0.157353	non-Active	0.145036	non-Active
P1_CGATGGCGTTGCCTCT.1	Macrophages	0.221162	non-Active	0.0392799	non-Active
P1_CGATGGCGTTGGAGGT.1	Epithelial cells	0.0907029	non-Active	0.0463257	non-Active
P1_CGATGTAAGACACTAA.1	Epithelial cells	0.116509	non-Active	0	non-Active
P1_CGATGTAAGCCACTAT.1	Epithelial cells	0.120345	non-Active	0.0378708	non-Active
P1_CGATGTAAGCGATGAC.1	Epithelial cells	0.159084	non-Active	0.0372014	non-Active
P1_CGATGTACATGGATGG.1	Epithelial cells	0.0978473	non-Active	0.0339252	non-Active
P1_CGATGTACATTACGAC.1	Epithelial cells	0.121666	non-Active	0.0490383	non-Active
P1_CGATGTACATTGGCGC.1	Epithelial cells	0.190035	non-Active	0	non-Active
P1_CGATGTAGTTTACTCT.1	Epithelial cells	0.155669	non-Active	0.100085	non-Active
P1_CGATGTATCACGAAGG.1	Epithelial cells	0.138726	non-Active	0.0510815	non-Active
P1_CGATGTATCGACAGCC.1	Epithelial cells	0.129079	non-Active	0.128373	non-Active
P1_CGATGTATCTCTAAGG.1	Epithelial cells	0.0894517	non-Active	0.0443176	non-Active
P1_CGATTGAAGCTGGAAC.1	Epithelial cells	0.114732	non-Active	0.039914	non-Active
P1_CGATTGAAGGCAAAGA.1	Mast	0.133347	non-Active	0.0754597	non-Active
P1_CGATTGACAACTTGAC.1	Epithelial cells	0.129781	non-Active	0.0507997	non-Active
P1_CGATTGACAGCTGTGC.1	CD8+ T-cells	0.0955321	non-Active	0.0702811	non-Active
P1_CGATTGAGTCAATACC.1	Epithelial cells	0.120824	non-Active	0.058092	non-Active
P1_CGATTGAGTCAATGTC.1	Epithelial cells	0.0678781	non-Active	0.0187416	non-Active
P1_CGATTGATCATATCGG.1	Epithelial cells	0.12839	non-Active	0.0529839	non-Active
P1_CGATTGATCTACCAGA.1	Epithelial cells	0.18841	non-Active	0.0326569	non-Active
P1_CGATTGATCTTCATGT.1	Endothelial cells	0.294138	OS-Active	0.167406	non-Active
P1_CGCCAAGAGAAGAAGC.1	Epithelial cells	0.120158	non-Active	0.0299796	non-Active
P1_CGCCAAGAGCGATGAC.1	Epithelial cells	0.0751277	non-Active	0.0764109	non-Active
P1_CGCCAAGAGGACTGGT.1	Epithelial cells	0.169315	non-Active	0.0579863	non-Active
P1_CGCCAAGCATATGGTC.1	Epithelial cells	0.143707	non-Active	0.0823645	non-Active
P1_CGCCAAGCATCTGGTA.1	Epithelial cells	0.129033	non-Active	0.0360741	non-Active
P1_CGCCAAGCATGACATC.1	Macrophages	0.25872	OS-Active	0.166279	non-Active
P1_CGCCAAGGTAGGACAC.1	Epithelial cells	0.0715964	non-Active	0	non-Active
P1_CGCCAAGGTGGTACAG.1	Epithelial cells	0.177816	non-Active	0.208694	Metabolism-Active
P1_CGCCAAGGTTGTCTTT.1	Epithelial cells	0.0866454	non-Active	0.0221588	non-Active
P1_CGCCAAGTCCGAAGAG.1	Epithelial cells	0.076262	non-Active	0.0559431	non-Active
P1_CGCGGTAAGAGAACAG.1	CD8+ T-cells	0.100244	non-Active	0.00324103	non-Active
P1_CGCGGTAAGGCAGGTT.1	Epithelial cells	0.0994259	non-Active	0.0104981	non-Active
P1_CGCGGTAAGGTGTGGT.1	Epithelial cells	0.120988	non-Active	0.0610512	non-Active
P1_CGCGGTACAAGGTTTC.1	CD8+ T-cells	0.0710352	non-Active	0	non-Active
P1_CGCGGTACACTAGTAC.1	Epithelial cells	0.172238	non-Active	0.042838	non-Active
P1_CGCGGTACAGTAACGG.1	CD8+ T-cells	0.107377	non-Active	0.0280772	non-Active
P1_CGCGGTACATGCCCGA.1	Fibroblasts	0.186434	non-Active	0.110653	non-Active
P1_CGCGGTACATGGGACA.1	Epithelial cells	0.0846459	non-Active	0.0261044	non-Active
P1_CGCGGTAGTAGCACGA.1	CD8+ T-cells	0.108277	non-Active	0.0711618	non-Active
P1_CGCGGTAGTGAGTATA.1	Epithelial cells	0.099613	non-Active	0.0378708	non-Active
P1_CGCGGTAGTGGCCCTA.1	Epithelial cells	0.127828	non-Active	0.0403016	non-Active
P1_CGCGGTATCACATAGC.1	Epithelial cells	0.090469	non-Active	0.0386458	non-Active
P1_CGCGGTATCTCCAGGG.1	Epithelial cells	0.110523	non-Active	0.0264567	non-Active
P1_CGCGTTTAGTGCCAGA.1	Epithelial cells	0.0865051	non-Active	0.0557669	non-Active
P1_CGCGTTTCAAGAAAGG.1	Fibroblasts	0.32454	OS-Active	0.1803	non-Active
P1_CGCGTTTCAGATGGCA.1	Macrophages	0.268636	OS-Active	0.0700345	non-Active
P1_CGCGTTTCAGATTGCT.1	Monocytes	0.152559	non-Active	0.0806031	non-Active
P1_CGCGTTTCAGCTTAAC.1	Epithelial cells	0.0898025	non-Active	0.0472064	non-Active
P1_CGCGTTTCAGGTGCCT.1	Epithelial cells	0.149495	non-Active	0.0521736	non-Active
P1_CGCGTTTGTATGGTTC.1	Epithelial cells	0.214193	non-Active	0.119777	non-Active
P1_CGCGTTTGTGATAAAC.1	CD8+ T-cells	0.0953099	non-Active	0.0819418	non-Active
P1_CGCGTTTGTGATGTCT.1	Fibroblasts	0.129524	non-Active	0.091982	non-Active
P1_CGCGTTTTCTACGAGT.1	Epithelial cells	0.0882707	non-Active	0.01078	non-Active
P1_CGCGTTTTCTTGTCAT.1	Fibroblasts	0.243624	non-Active	0.157084	non-Active
P1_CGCTATCAGCAGACTG.1	CD8+ T-cells	0.0810093	non-Active	0.0862045	non-Active
P1_CGCTATCAGCTGCCCA.1	Epithelial cells	0.101308	non-Active	0.0586557	non-Active
P1_CGCTATCCAAGCTGAG.1	Epithelial cells	0.0928544	non-Active	0.0533714	non-Active
P1_CGCTATCCAGCCTTTC.1	Epithelial cells	0.105892	non-Active	0.0482985	non-Active
P1_CGCTATCCATGGATGG.1	Epithelial cells	0.115667	non-Active	0	non-Active
P1_CGCTATCGTAATCGTC.1	Epithelial cells	0.182984	non-Active	0.0616501	non-Active
P1_CGCTATCGTACCGGCT.1	Epithelial cells	0.188001	non-Active	0.0355105	non-Active
P1_CGCTATCGTCGAACAG.1	CD8+ T-cells	0.0784953	non-Active	0.0671458	non-Active
P1_CGCTATCTCGTCTGAA.1	Myofibroblasts	0.162638	non-Active	0.0808849	non-Active
P1_CGCTATCTCTAACCGA.1	Epithelial cells	0.149811	non-Active	0.0257169	non-Active
P1_CGCTATCTCTGCTGCT.1	CD8+ T-cells	0.0748471	non-Active	0.0186359	non-Active
P1_CGCTGGAAGCTAGCCC.1	Epithelial cells	0.204628	non-Active	0.00405129	non-Active
P1_CGCTGGAAGTCAAGGC.1	Epithelial cells	0.119316	non-Active	0.0525964	non-Active
P1_CGCTGGACAACAACCT.1	CD8+ T-cells	0.0875808	non-Active	0.0724653	non-Active
P1_CGCTGGATCAAGGTAA.1	CD8+ T-cells	0.112125	non-Active	0.0582682	non-Active
P1_CGCTGGATCCGATATG.1	Epithelial cells	0.087347	non-Active	0	non-Active
P1_CGCTGGATCTGCTGCT.1	Epithelial cells	0.152197	non-Active	0.0291693	non-Active
P1_CGCTTCAAGAAGATTC.1	Epithelial cells	0.141322	non-Active	0.0184598	non-Active
P1_CGCTTCAAGCTGTTCA.1	Epithelial cells	0.0909133	non-Active	0.0246248	non-Active
P1_CGCTTCAGTCCGACGT.1	B-cells	0.108815	non-Active	0.0743324	non-Active
P1_CGCTTCAGTGCACTTA.1	Epithelial cells	0.147589	non-Active	0.0697527	non-Active
P1_CGCTTCAGTTACCGAT.1	Epithelial cells	0.194058	non-Active	0.0486507	non-Active
P1_CGCTTCATCAGAGACG.1	Epithelial cells	0.115948	non-Active	0.0447756	non-Active
P1_CGCTTCATCAGGCCCA.1	Epithelial cells	0.141696	non-Active	0.0410414	non-Active
P1_CGGACACAGACTAGGC.1	CD8+ T-cells	0.131862	non-Active	0.0181427	non-Active
P1_CGGACACAGTCTCGGC.1	Macrophages	0.274985	OS-Active	0.12249	non-Active
P1_CGGACACCACCTTGTC.1	Epithelial cells	0.11244	non-Active	0.0387515	non-Active
P1_CGGACACGTGCGAAAC.1	Epithelial cells	0.122625	non-Active	0.0225816	non-Active
P1_CGGACACTCAAACAAG.1	Endothelial cells	0.205879	non-Active	0.0579863	non-Active
P1_CGGACACTCCGTAGGC.1	CD8+ T-cells	0.132599	non-Active	0.0258226	non-Active
P1_CGGACACTCCTCAATT.1	B-cells	0.130541	non-Active	0.0901501	non-Active
P1_CGGACACTCGAGCCCA.1	Epithelial cells	0.0701231	non-Active	0.0273726	non-Active
P1_CGGACACTCTCCAACC.1	Myofibroblasts	0.21935	non-Active	0.0456211	non-Active
P1_CGGACGTCACCGAATT.1	Epithelial cells	0.0938366	non-Active	0.0532657	non-Active
P1_CGGACGTGTCTGGTCG.1	Epithelial cells	0.227523	non-Active	0.0292045	non-Active
P1_CGGACGTTCACTCCTG.1	Epithelial cells	0.111856	non-Active	0.0530191	non-Active
P1_CGGACGTTCCACTCCA.1	Epithelial cells	0.146163	non-Active	0.0612978	non-Active
P1_CGGACGTTCGTAGGTT.1	Epithelial cells	0.0831959	non-Active	0.0245896	non-Active
P1_CGGACGTTCTGGTATG.1	Epithelial cells	0.154734	non-Active	0.126647	non-Active
P1_CGGACGTTCTTGTACT.1	Epithelial cells	0.120298	non-Active	0.0503417	non-Active
P1_CGGACTGAGCTGCGAA.1	B-cells	0.128752	non-Active	0.0341718	non-Active
P1_CGGACTGAGGTGCACA.1	Epithelial cells	0.217759	non-Active	0.132988	non-Active
P1_CGGACTGCAGGGTACA.1	Epithelial cells	0.188199	non-Active	0.0113788	non-Active
P1_CGGACTGCATTCGACA.1	Epithelial cells	0.150957	non-Active	0.0882477	non-Active
P1_CGGACTGGTCGAACAG.1	Epithelial cells	0.144386	non-Active	0.0443176	non-Active
P1_CGGACTGTCGGATGTT.1	Epithelial cells	0.125419	non-Active	0.0740858	non-Active
P1_CGGAGCTAGAGTCTGG.1	Epithelial cells	0.246244	non-Active	0	non-Active
P1_CGGAGCTAGTCTCAAC.1	CD8+ T-cells	0.0910537	non-Active	0.0840203	non-Active
P1_CGGAGCTCAACTGGCC.1	Epithelial cells	0.135101	non-Active	0.0641513	non-Active
P1_CGGAGCTCATTAGCCA.1	Epithelial cells	0.193566	non-Active	0.0716198	non-Active
P1_CGGAGCTGTTAAGACA.1	Epithelial cells	0.119596	non-Active	0.0963503	non-Active
P1_CGGAGCTTCAGCTCTC.1	Fibroblasts	0.127045	non-Active	0.075495	non-Active
P1_CGGAGTCAGCTTTGGT.1	Epithelial cells	0.11147	non-Active	0.0986402	non-Active
P1_CGGAGTCAGGAGTACC.1	Epithelial cells	0.0903872	non-Active	0.0312126	non-Active
P1_CGGAGTCAGTTACCCA.1	Epithelial cells	0.0863414	non-Active	0.0793701	non-Active
P1_CGGAGTCCACACAGAG.1	CD8+ T-cells	0.113808	non-Active	0	non-Active
P1_CGGAGTCCAGGACGTA.1	Myofibroblasts	0.122648	non-Active	0.137039	non-Active
P1_CGGAGTCGTCGAATCT.1	Myofibroblasts	0.158511	non-Active	0.100543	non-Active
P1_CGGAGTCGTGAGGGAG.1	CD8+ T-cells	0.107354	non-Active	0.0582329	non-Active
P1_CGGAGTCGTGCAGTAG.1	Epithelial cells	0.105623	non-Active	0.0440358	non-Active
P1_CGGAGTCTCATGCTCC.1	CD8+ T-cells	0.0922347	non-Active	0.0447051	non-Active
P1_CGGCTAGAGAGCAATT.1	Macrophages	0.227161	non-Active	0.240154	Metabolism-Active
P1_CGGCTAGCACCTCGGA.1	Endothelial cells	0.266929	OS-Active	0.135384	non-Active
P1_CGGCTAGCACTGAAGG.1	Epithelial cells	0.158148	non-Active	0.0343831	non-Active
P1_CGGCTAGCAGTCAGAG.1	CD8+ T-cells	0.0779107	non-Active	0.0425562	non-Active
P1_CGGCTAGGTAGCGCTC.1	Epithelial cells	0.131196	non-Active	0.0452688	non-Active
P1_CGGCTAGTCAGGTTCA.1	Epithelial cells	0.153003	non-Active	0.0812725	non-Active
P1_CGGCTAGTCAGTTTGG.1	Epithelial cells	0.0701699	non-Active	0	non-Active
P1_CGGCTAGTCATAAAGG.1	Monocytes	0.172507	non-Active	0.00422744	non-Active
P1_CGGCTAGTCGCGGATC.1	Epithelial cells	0.160768	non-Active	0.0350877	non-Active
P1_CGGGTCAAGACATAAC.1	Epithelial cells	0.210849	non-Active	0.0659832	non-Active
P1_CGGGTCAAGCTACCTA.1	Epithelial cells	0.146163	non-Active	0.12397	non-Active
P1_CGGGTCAAGCTGCCCA.1	Epithelial cells	0.133324	non-Active	0.0299443	non-Active
P1_CGGGTCACAAACTGTC.1	Epithelial cells	0.123666	non-Active	0.051927	non-Active
P1_CGGGTCACACTGTTAG.1	B-cells	0.14393	non-Active	0.0537237	non-Active
P1_CGGGTCACAGACACTT.1	Epithelial cells	0.103518	non-Active	0.0466779	non-Active
P1_CGGGTCAGTAAATGTG.1	Epithelial cells	0.0978707	non-Active	0.0427323	non-Active
P1_CGGGTCAGTCTGATTG.1	Monocytes	0.12625	non-Active	0	non-Active
P1_CGGGTCATCAGCGACC.1	B-cells	0.075081	non-Active	0.0701402	non-Active
P1_CGGGTCATCCTATGTT.1	Epithelial cells	0.117772	non-Active	0	non-Active
P1_CGGGTCATCCTGTACC.1	Monocytes	0.185452	non-Active	0.106531	non-Active
P1_CGGTTAACAAGGGTCA.1	B-cells	0.169327	non-Active	0.0609808	non-Active
P1_CGGTTAACACGTGAGA.1	Epithelial cells	0.226178	non-Active	0.0585148	non-Active
P1_CGGTTAACACTAAGTC.1	Epithelial cells	0.103694	non-Active	0.0230748	non-Active
P1_CGGTTAACAGTATCTG.1	Epithelial cells	0.166158	non-Active	0.0585148	non-Active
P1_CGGTTAACATCTATGG.1	Epithelial cells	0.119047	non-Active	0.0351582	non-Active
P1_CGGTTAACATTGAGCT.1	Epithelial cells	0.10919	non-Active	0.0602057	non-Active
P1_CGGTTAAGTAGCGTCC.1	Epithelial cells	0.15443	non-Active	0.0642218	non-Active
P1_CGGTTAAGTCTCTCTG.1	Epithelial cells	0.195823	non-Active	0.0218065	non-Active
P1_CGGTTAAGTTCCCGAG.1	Epithelial cells	0.153915	non-Active	0.00521384	non-Active
P1_CGGTTAATCGCTTAGA.1	Epithelial cells	0.101063	non-Active	0.0422391	non-Active
P1_CGGTTAATCTGGTGTA.1	Epithelial cells	0.109494	non-Active	0	non-Active
P1_CGTAGCGAGCAACGGT.1	Epithelial cells	0.216917	non-Active	0.0150779	non-Active
P1_CGTAGCGAGGACAGAA.1	Epithelial cells	0.120848	non-Active	0	non-Active
P1_CGTAGCGCAGCCAGAA.1	Myofibroblasts	0.174671	non-Active	0.089516	non-Active
P1_CGTAGCGGTAGAGTGC.1	Epithelial cells	0.0968768	non-Active	0.04622	non-Active
P1_CGTAGCGGTGACTACT.1	Myofibroblasts	0.134762	non-Active	0.0479462	non-Active
P1_CGTAGCGGTGCCTGGT.1	Epithelial cells	0.119234	non-Active	0.0962446	non-Active
P1_CGTAGGCAGAGCAATT.1	CD8+ T-cells	0.111984	non-Active	0	non-Active
P1_CGTAGGCAGAGCTGGT.1	Epithelial cells	0.0729295	non-Active	0.0320228	non-Active
P1_CGTAGGCAGCCTTGAT.1	CD8+ T-cells	0.114147	non-Active	0	non-Active
P1_CGTAGGCCACAGATTC.1	Epithelial cells	0.147964	non-Active	0.0856056	non-Active
P1_CGTAGGCGTCTAGCGC.1	Epithelial cells	0.0812198	non-Active	0.0977595	non-Active
P1_CGTAGGCGTGCAGACA.1	Macrophages	0.36163	OS-Active	0.322835	Metabolism-Active
P1_CGTAGGCGTTACGGAG.1	Epithelial cells	0.204347	non-Active	0.0352639	non-Active
P1_CGTAGGCTCCCTAACC.1	Epithelial cells	0.171689	non-Active	0.212887	Metabolism-Active
P1_CGTCACTAGGGAAACA.1	Epithelial cells	0.0887384	non-Active	0.0555908	non-Active
P1_CGTCACTCAAACTGCT.1	Epithelial cells	0.095953	non-Active	0.0319524	non-Active
P1_CGTCACTCACTCGACG.1	Epithelial cells	0.0617392	non-Active	0.0485803	non-Active
P1_CGTCACTCAGTCGTGC.1	Epithelial cells	0.102373	non-Active	0	non-Active
P1_CGTCACTGTGAAGGCT.1	Epithelial cells	0.123467	non-Active	0.0641866	non-Active
P1_CGTCACTGTTTACTCT.1	Epithelial cells	0.0778405	non-Active	0.0460086	non-Active
P1_CGTCACTTCAGCTGGC.1	CD8+ T-cells	0.118836	non-Active	0.0145494	non-Active
P1_CGTCACTTCCAGTATG.1	Epithelial cells	0.146596	non-Active	0.0462904	non-Active
P1_CGTCAGGCAACGCACC.1	Epithelial cells	0.149659	non-Active	0.0162756	non-Active
P1_CGTCAGGCAAGGTTTC.1	Epithelial cells	0.145415	non-Active	0.038681	non-Active
P1_CGTCAGGGTGGTACAG.1	Endothelial cells	0.161422	non-Active	0.215	Metabolism-Active
P1_CGTCAGGTCGAATGGG.1	Mast	0.195882	non-Active	0.012788	non-Active
P1_CGTCAGGTCGCCTGTT.1	Epithelial cells	0.108956	non-Active	0.0198337	non-Active
P1_CGTCCATAGCCCTAAT.1	Fibroblasts	0.263795	OS-Active	0.257169	Metabolism-Active
P1_CGTCCATAGGGATCTG.1	Epithelial cells	0.0779107	non-Active	0.0635172	non-Active
P1_CGTCCATAGTACGTTC.1	CD8+ T-cells	0.102945	non-Active	0.0538294	non-Active
P1_CGTCCATCACGCTTTC.1	Epithelial cells	0.194677	non-Active	0.059783	non-Active
P1_CGTCCATCACTGAAGG.1	Epithelial cells	0.169549	non-Active	0.0833157	non-Active
P1_CGTCCATCACTTAAGC.1	Epithelial cells	0.221899	non-Active	0.0711971	non-Active
P1_CGTCCATCAGTAAGCG.1	Epithelial cells	0.212907	non-Active	0.0875784	non-Active
P1_CGTCCATGTAATTGGA.1	Epithelial cells	0.130249	non-Active	0.0480166	non-Active
P1_CGTCCATGTGTTCTTT.1	Epithelial cells	0.0774897	non-Active	0.0102163	non-Active
P1_CGTCCATTCACTGGGC.1	Monocytes	0.172753	non-Active	0.000986402	non-Active
P1_CGTCCATTCTACTATC.1	Epithelial cells	0.126215	non-Active	0	non-Active
P1_CGTCTACAGGCCCTCA.1	Epithelial cells	0.18054	non-Active	0.0806031	non-Active
P1_CGTCTACGTATGAAAC.1	Epithelial cells	0.103752	non-Active	0	non-Active
P1_CGTGAGCAGATATGCA.1	Epithelial cells	0.0885046	non-Active	0.0444233	non-Active
P1_CGTGAGCGTATAGGGC.1	Epithelial cells	0.12259	non-Active	0.059783	non-Active
P1_CGTGAGCGTGCAACGA.1	CD8+ T-cells	0.0589797	non-Active	0	non-Active
P1_CGTGAGCGTGCAGGTA.1	Epithelial cells	0.235182	non-Active	0.0928979	non-Active
P1_CGTGAGCTCGGCGCAT.1	CD8+ T-cells	0.0725319	non-Active	0.0332911	non-Active
P1_CGTGTAAGTTTGCATG.1	Epithelial cells	0.101355	non-Active	0.0349468	non-Active
P1_CGTGTCTAGACCGGAT.1	Epithelial cells	0.0757709	non-Active	0.01078	non-Active
P1_CGTGTCTAGGTGATAT.1	CD8+ T-cells	0.0743794	non-Active	0.0435778	non-Active
P1_CGTGTCTCAACACCTA.1	Epithelial cells	0.0968066	non-Active	0.0661594	non-Active
P1_CGTGTCTGTCATGCAT.1	Epithelial cells	0.136142	non-Active	0.122525	non-Active
P1_CGTGTCTGTTTGACAC.1	Epithelial cells	0.0983735	non-Active	0.0633763	non-Active
P1_CGTTAGAAGAGTCTGG.1	Epithelial cells	0.0789864	non-Active	0.0630945	non-Active
P1_CGTTAGAAGGCGATAC.1	B-cells	0.17446	non-Active	0	non-Active
P1_CGTTAGACACATCTTT.1	Epithelial cells	0.082354	non-Active	0.0442824	non-Active
P1_CGTTAGAGTACCTACA.1	Epithelial cells	0.118029	non-Active	0.0428028	non-Active
P1_CGTTAGAGTAGAAAGG.1	Epithelial cells	0.0981279	non-Active	0.037589	non-Active
P1_CGTTAGAGTCATATGC.1	Epithelial cells	0.111131	non-Active	0.0510463	non-Active
P1_CGTTAGATCAGTCAGT.1	Epithelial cells	0.109119	non-Active	0.00130346	non-Active
P1_CGTTAGATCGTTGCCT.1	Epithelial cells	0.110873	non-Active	0.00140915	non-Active
P1_CGTTCTGAGTGGGCTA.1	Epithelial cells	0.10477	non-Active	0.0662651	non-Active
P1_CGTTCTGAGTGGGTTG.1	CD8+ T-cells	0.063423	non-Active	0.0185303	non-Active
P1_CGTTCTGCAAGCCCAC.1	Epithelial cells	0.118591	non-Active	0.0461495	non-Active
P1_CGTTCTGCAGCCTTGG.1	Endothelial cells	0.26832	OS-Active	0.208448	Metabolism-Active
P1_CGTTCTGCATTTCAGG.1	Endothelial cells	0.222296	non-Active	0.358627	Metabolism-Active
P1_CGTTCTGGTGATGTCT.1	Mast	0.167456	non-Active	0.0806031	non-Active
P1_CGTTCTGGTGTGCCTG.1	Mast	0.201389	non-Active	0.0104981	non-Active
P1_CGTTCTGGTTCGTCTC.1	Epithelial cells	0.162229	non-Active	0.0633411	non-Active
P1_CGTTCTGTCAACTCTT.1	Epithelial cells	0.0908081	non-Active	0.00077503	non-Active
P1_CGTTCTGTCCACGAAT.1	Epithelial cells	0.08868	non-Active	0.0847953	non-Active
P1_CGTTCTGTCCAGTATG.1	CD8+ T-cells	0.111797	non-Active	0.0523145	non-Active
P1_CGTTGGGAGTAAGTAC.1	Epithelial cells	0.124589	non-Active	0.0269851	non-Active
P1_CGTTGGGCACCCATGG.1	Epithelial cells	0.157739	non-Active	0.0381174	non-Active
P1_CGTTGGGCATATGCTG.1	Epithelial cells	0.102408	non-Active	0.000845487	non-Active
P1_CGTTGGGGTAAGGGAA.1	Epithelial cells	0.112931	non-Active	0.0559431	non-Active
P1_CTAACTTAGGACAGAA.1	Epithelial cells	0.103787	non-Active	0.0384344	non-Active
P1_CTAACTTAGGCATGTG.1	CD8+ T-cells	0.124975	non-Active	0.00690481	non-Active
P1_CTAACTTCAAGAGTCG.1	Epithelial cells	0.11969	non-Active	0.0420278	non-Active
P1_CTAACTTCAAGCCTAT.1	Monocytes	0.153413	non-Active	0.0298739	non-Active
P1_CTAACTTGTAGGCTGA.1	Monocytes	0.183569	non-Active	0.0574931	non-Active
P1_CTAACTTGTCTAAACC.1	Monocytes	0.169128	non-Active	0.0426266	non-Active
P1_CTAACTTGTTGTTTGG.1	Epithelial cells	0.106594	non-Active	0.0452688	non-Active
P1_CTAACTTGTTTGTTTC.1	Epithelial cells	0.13461	non-Active	0.0333967	non-Active
P1_CTAACTTTCCTCCTAG.1	CD8+ T-cells	0.123853	non-Active	0.0248362	non-Active
P1_CTAACTTTCTTATCTG.1	B-cells	0.159739	non-Active	0.0512929	non-Active
P1_CTAAGACAGACTACAA.1	Epithelial cells	0.112499	non-Active	0.0458677	non-Active
P1_CTAAGACAGCGTTCCG.1	Epithelial cells	0.200781	non-Active	0.315332	Metabolism-Active
P1_CTAAGACCACCGAATT.1	Epithelial cells	0.251014	non-Active	0.0491087	non-Active
P1_CTAAGACCACCGCTAG.1	Epithelial cells	0.081021	non-Active	0	non-Active
P1_CTAAGACGTCCTGCTT.1	Epithelial cells	0.115738	non-Active	0.0292398	non-Active
P1_CTAAGACGTGTGACGA.1	Fibroblasts	0.27488	OS-Active	0.279011	Metabolism-Active
P1_CTAAGACGTTAAGTAG.1	Monocytes	0.119	non-Active	0.074579	non-Active
P1_CTAAGACGTTCAGACT.1	Epithelial cells	0.188164	non-Active	0	non-Active
P1_CTAAGACGTTCGGCAC.1	Epithelial cells	0.163305	non-Active	0.0427323	non-Active
P1_CTAAGACGTTGAGGTG.1	Epithelial cells	0.12922	non-Active	0.0463609	non-Active
P1_CTAAGACTCGGCGCAT.1	Epithelial cells	0.0925621	non-Active	0	non-Active
P1_CTAATGGCAAGTAGTA.1	Epithelial cells	0.101203	non-Active	0.0273726	non-Active
P1_CTAATGGCAGTCAGAG.1	Epithelial cells	0.0776417	non-Active	0.037589	non-Active
P1_CTAATGGGTAGCGTCC.1	Epithelial cells	0.116954	non-Active	0.0510815	non-Active
P1_CTAATGGGTCAGAGGT.1	Epithelial cells	0.104594	non-Active	0.0315296	non-Active
P1_CTAATGGGTGATGATA.1	Epithelial cells	0.158031	non-Active	0.0484394	non-Active
P1_CTAATGGTCCATTCTA.1	Endothelial cells	0.216684	non-Active	0.0367435	non-Active
P1_CTAATGGTCGTAGATC.1	Epithelial cells	0.0479882	non-Active	0.0316353	non-Active
P1_CTACACCAGAGGGCTT.1	Epithelial cells	0.133382	non-Active	0.0486155	non-Active
P1_CTACACCAGGCCGAAT.1	Epithelial cells	0.108476	non-Active	0.0683788	non-Active
P1_CTACACCCAATGAAAC.1	Epithelial cells	0.0815238	non-Active	0.0265272	non-Active
P1_CTACACCCATCGTCGG.1	Epithelial cells	0.152161	non-Active	0.0481575	non-Active
P1_CTACACCGTCTGGAGA.1	Epithelial cells	0.177126	non-Active	0.0983231	non-Active
P1_CTACACCGTTTGTTTC.1	Epithelial cells	0.0816408	non-Active	0.0182132	non-Active
P1_CTACACCTCATTGCCC.1	CD8+ T-cells	0.146865	non-Active	0.0408652	non-Active
P1_CTACACCTCCAGGGCT.1	Epithelial cells	0.0788695	non-Active	0.015712	non-Active
P1_CTACACCTCGTCGTTC.1	Epithelial cells	0.080109	non-Active	0.0225463	non-Active
P1_CTACATTAGATAGGAG.1	Macrophages	0.206312	non-Active	0.0988868	non-Active
P1_CTACATTCAACTGCGC.1	Epithelial cells	0.135218	non-Active	0.0144085	non-Active
P1_CTACATTCAAGAAGAG.1	Monocytes	0.246875	non-Active	0.113965	non-Active
P1_CTACATTCAAGCGCTC.1	Epithelial cells	0.121116	non-Active	0.00595364	non-Active
P1_CTACATTCAGATCCAT.1	Epithelial cells	0.097403	non-Active	0.0708448	non-Active
P1_CTACATTGTCGAAAGC.1	Myofibroblasts	0.162615	non-Active	0.055309	non-Active
P1_CTACATTGTTAGGGTG.1	B-cells	0.112721	non-Active	0.0453745	non-Active
P1_CTACCCAAGTGGGCTA.1	Fibroblasts	0.262555	OS-Active	0.334637	Metabolism-Active
P1_CTACCCACAAACAACA.1	Myofibroblasts	0.154021	non-Active	0.18872	Metabolism-Active
P1_CTACCCACAAATCCGT.1	Epithelial cells	0.137545	non-Active	0.0207849	non-Active
P1_CTACCCACACCAGGTC.1	Epithelial cells	0.173338	non-Active	0.0281829	non-Active
P1_CTACCCACATCCGCGA.1	CD8+ T-cells	0.092223	non-Active	0	non-Active
P1_CTACCCACATGAGCGA.1	Macrophages	0.226389	non-Active	0.0759882	non-Active
P1_CTACCCATCAAGGTAA.1	Epithelial cells	0.131313	non-Active	0.026034	non-Active
P1_CTACCCATCCGCGTTT.1	B-cells	0.160616	non-Active	0.013246	non-Active
P1_CTACCCATCGTGGTCG.1	B-cells	0.150291	non-Active	0.0368139	non-Active
P1_CTACGTCAGACTAGAT.1	CD8+ T-cells	0.100502	non-Active	0.0681674	non-Active
P1_CTACGTCAGCATCATC.1	Epithelial cells	0.126484	non-Active	0.0188121	non-Active
P1_CTACGTCAGTATGACA.1	Monocytes	0.182248	non-Active	0.0766927	non-Active
P1_CTACGTCAGTCATCCA.1	Endothelial cells	0.206125	non-Active	0.162792	non-Active
P1_CTACGTCCACCGGAAA.1	Epithelial cells	0.152933	non-Active	0	non-Active
P1_CTACGTCCAGCCAATT.1	Epithelial cells	0.16417	non-Active	0.0552385	non-Active
P1_CTACGTCCAGCGTTCG.1	Epithelial cells	0.186539	non-Active	0.0245191	non-Active
P1_CTACGTCGTACCGCTG.1	Epithelial cells	0.169771	non-Active	0.0654548	non-Active
P1_CTACGTCGTGGCTCCA.1	Fibroblasts	0.130295	non-Active	0.0578454	non-Active
P1_CTACGTCGTTCCACGG.1	Epithelial cells	0.0926556	non-Active	0.0625308	non-Active
P1_CTACGTCTCGCCTGAG.1	Epithelial cells	0.167012	non-Active	0.0401254	non-Active
P1_CTAGAGTAGCACCGTC.1	CD8+ T-cells	0.150641	non-Active	0.0319524	non-Active
P1_CTAGAGTAGCGAAGGG.1	Epithelial cells	0.219572	non-Active	0.106285	non-Active
P1_CTAGAGTAGGAATGGA.1	Epithelial cells	0.136914	non-Active	0.085359	non-Active
P1_CTAGAGTCAAGACACG.1	Epithelial cells	0.11582	non-Active	0.0333615	non-Active
P1_CTAGAGTCAATGACCT.1	Epithelial cells	0.124484	non-Active	0.0703868	non-Active
P1_CTAGAGTCAGCCTTGG.1	Epithelial cells	0.184902	non-Active	0.0453745	non-Active
P1_CTAGAGTCAGCTGGCT.1	Epithelial cells	0.093404	non-Active	0.0304023	non-Active
P1_CTAGAGTGTAAGAGAG.1	Epithelial cells	0.0676676	non-Active	0.0239202	non-Active
P1_CTAGAGTGTCAGAATA.1	Epithelial cells	0.104442	non-Active	0.0550271	non-Active
P1_CTAGAGTGTTGCTCCT.1	Epithelial cells	0.0801207	non-Active	0.0856408	non-Active
P1_CTAGAGTTCACTTCAT.1	CD8+ T-cells	0.0806001	non-Active	0.0821884	non-Active
P1_CTAGAGTTCTAACCGA.1	Epithelial cells	0.135394	non-Active	0.00760938	non-Active
P1_CTAGAGTTCTAGAGTC.1	Epithelial cells	0.130401	non-Active	0.0566476	non-Active
P1_CTAGCCTAGACCGGAT.1	Epithelial cells	0.132166	non-Active	0.0867329	non-Active
P1_CTAGCCTAGCCAACAG.1	CD8+ T-cells	0.0745782	non-Active	0.0228986	non-Active
P1_CTAGCCTAGCTCTCGG.1	CD8+ T-cells	0.150782	non-Active	0.0484746	non-Active
P1_CTAGCCTAGTCATCCA.1	Epithelial cells	0.1324	non-Active	0.012013	non-Active
P1_CTAGCCTAGTGGGCTA.1	Epithelial cells	0.138633	non-Active	0.0393504	non-Active
P1_CTAGCCTCACAGTCGC.1	B-cells	0.121385	non-Active	0.0147256	non-Active
P1_CTAGCCTGTCATCCCT.1	Epithelial cells	0.194806	non-Active	0.0578806	non-Active
P1_CTAGCCTGTCGGCATC.1	B-cells	0.152056	non-Active	0.0798985	non-Active
P1_CTAGCCTGTGAAAGAG.1	Epithelial cells	0.0991102	non-Active	0.0321637	non-Active
P1_CTAGCCTTCGGCTACG.1	Epithelial cells	0.113843	non-Active	0.0673219	non-Active
P1_CTAGTGAAGTGGGCTA.1	Epithelial cells	0.134248	non-Active	0.0303319	non-Active
P1_CTAGTGAAGTTAACGA.1	Epithelial cells	0.0867974	non-Active	0.00359332	non-Active
P1_CTAGTGACAAGCGAGT.1	CD8+ T-cells	0.0872534	non-Active	0	non-Active
P1_CTAGTGACAATAGCAA.1	Epithelial cells	0.120076	non-Active	0.0663707	non-Active
P1_CTAGTGAGTATAGTAG.1	Epithelial cells	0.093708	non-Active	0.0782428	non-Active
P1_CTAGTGATCGAACTGT.1	Epithelial cells	0.245285	non-Active	0.127809	non-Active
P1_CTCACACAGACTCGGA.1	Epithelial cells	0.14359	non-Active	0.0660185	non-Active
P1_CTCACACAGGCAGGTT.1	Epithelial cells	0.0909016	non-Active	0.0307898	non-Active
P1_CTCACACAGTACGATA.1	Epithelial cells	0.134575	non-Active	0	non-Active
P1_CTCACACAGTCTCCTC.1	Epithelial cells	0.117246	non-Active	0.041288	non-Active
P1_CTCACACCAAGCGATG.1	Macrophages	0.243168	non-Active	0.0615444	non-Active
P1_CTCACACCACATTTCT.1	Endothelial cells	0.190398	non-Active	0.187099	Metabolism-Active
P1_CTCACACCATCCGCGA.1	Epithelial cells	0.114931	non-Active	0.0472064	non-Active
P1_CTCACACCATCGGGTC.1	Epithelial cells	0.094772	non-Active	0.0614035	non-Active
P1_CTCACACGTGTGGTTT.1	Epithelial cells	0.072415	non-Active	0.0889171	non-Active
P1_CTCACACGTTGATTCG.1	CD8+ T-cells	0.100899	non-Active	0.0233566	non-Active
P1_CTCAGAAAGGGCTTGA.1	Macrophages	0.311315	OS-Active	0.0722187	non-Active
P1_CTCAGAACAGCTCCGA.1	B-cells	0.124601	non-Active	0.0642218	non-Active
P1_CTCAGAAGTACTCTCC.1	Epithelial cells	0.0997884	non-Active	0.0702459	non-Active
P1_CTCAGAAGTCGCGAAA.1	Epithelial cells	0.161352	non-Active	0.108821	non-Active
P1_CTCAGAAGTCGCTTTC.1	Epithelial cells	0.0757241	non-Active	0.0635172	non-Active
P1_CTCAGAAGTTGTACAC.1	Epithelial cells	0.112709	non-Active	0.0667935	non-Active
P1_CTCAGAATCAACTCTT.1	Epithelial cells	0.13585	non-Active	0.0438596	non-Active
P1_CTCAGAATCCAAAGTC.1	Epithelial cells	0.141287	non-Active	0	non-Active
P1_CTCAGAATCCCTAATT.1	Epithelial cells	0.102525	non-Active	0.0616149	non-Active
P1_CTCAGAATCTGCGTAA.1	Epithelial cells	0.0910303	non-Active	0.0694004	non-Active
P1_CTCATTAAGATCTGAA.1	Epithelial cells	0.106944	non-Active	0	non-Active
P1_CTCATTAAGTAGGTGC.1	Monocytes	0.165842	non-Active	0.106285	non-Active
P1_CTCATTACATCCTTGC.1	Epithelial cells	0.140644	non-Active	0.0733108	non-Active
P1_CTCATTACATGCCCGA.1	CD8+ T-cells	0.130143	non-Active	0.0333967	non-Active
P1_CTCATTAGTCCGAGTC.1	Epithelial cells	0.0931233	non-Active	0.0179314	non-Active
P1_CTCATTAGTGTGCCTG.1	Epithelial cells	0.215339	non-Active	0.0370605	non-Active
P1_CTCATTATCAAACCAC.1	Epithelial cells	0.185194	non-Active	0.0434721	non-Active
P1_CTCATTATCAACCAAC.1	Epithelial cells	0.0562786	non-Active	0.0365321	non-Active
P1_CTCCTAGAGTTAACGA.1	Epithelial cells	0.122707	non-Active	0.0425914	non-Active
P1_CTCCTAGGTCTTGTCC.1	Epithelial cells	0.0863764	non-Active	0.0285	non-Active
P1_CTCCTAGGTTGATTCG.1	Fibroblasts	0.287228	OS-Active	0.316705	Metabolism-Active
P1_CTCCTAGTCCCAACGG.1	Epithelial cells	0.095041	non-Active	0.0546748	non-Active
P1_CTCCTAGTCGTACCGG.1	Epithelial cells	0.098888	non-Active	0.0517156	non-Active
P1_CTCGAAAAGCCGCCTA.1	Fibroblasts	0.256908	OS-Active	0.249841	Metabolism-Active
P1_CTCGAAAAGTGCGTGA.1	Epithelial cells	0.138153	non-Active	0.0166631	non-Active
P1_CTCGAAACAACTTGAC.1	Endothelial cells	0.280118	OS-Active	0.139928	non-Active
P1_CTCGAAACAAGCGTAG.1	Epithelial cells	0.14034	non-Active	0.0495315	non-Active
P1_CTCGAAACACATAACC.1	Epithelial cells	0.131161	non-Active	0.0119425	non-Active
P1_CTCGAAACACTGAAGG.1	Endothelial cells	0.186188	non-Active	0.0321285	non-Active
P1_CTCGAAATCATCGGAT.1	Epithelial cells	0.10788	non-Active	0.0983936	non-Active
P1_CTCGAAATCCAAGCCG.1	Fibroblasts	0.285252	OS-Active	0.244945	Metabolism-Active
P1_CTCGAGGAGCTGCAAG.1	Epithelial cells	0.153763	non-Active	0.00461495	non-Active
P1_CTCGAGGAGGCAGTCA.1	Epithelial cells	0.130506	non-Active	0.020961	non-Active
P1_CTCGAGGAGGGTTTCT.1	Epithelial cells	0.12839	non-Active	0.0802861	non-Active
P1_CTCGAGGCACGAAACG.1	Epithelial cells	0.221864	non-Active	0.0839146	non-Active
P1_CTCGAGGCAGCTGCAC.1	Myofibroblasts	0.235673	non-Active	0.118263	non-Active
P1_CTCGAGGCAGGATCGA.1	Epithelial cells	0.135557	non-Active	0.0477348	non-Active
P1_CTCGAGGTCAAACAAG.1	Epithelial cells	0.109119	non-Active	0	non-Active
P1_CTCGAGGTCACTGGGC.1	Epithelial cells	0.101648	non-Active	0.00771507	non-Active
P1_CTCGGAGGTAGCGCAA.1	Epithelial cells	0.121958	non-Active	0.0678151	non-Active
P1_CTCGGAGGTCACACGC.1	Epithelial cells	0.284772	OS-Active	0.0331501	non-Active
P1_CTCGGAGGTGAGTGAC.1	Epithelial cells	0.19083	non-Active	0.113542	non-Active
P1_CTCGGAGTCGACCAGC.1	Myofibroblasts	0.20409	non-Active	0.142042	non-Active
P1_CTCGGAGTCGGATGGA.1	Endothelial cells	0.186656	non-Active	0.123899	non-Active
P1_CTCGGGAAGCAGGCTA.1	Epithelial cells	0.167842	non-Active	0.0389629	non-Active
P1_CTCGGGAAGTACGTAA.1	Epithelial cells	0.110675	non-Active	0.0299091	non-Active
P1_CTCGGGACAGTGGGAT.1	CD8+ T-cells	0.119994	non-Active	0.0661241	non-Active
P1_CTCGGGACATGGTCAT.1	Epithelial cells	0.108044	non-Active	0.0591841	non-Active
P1_CTCGGGATCACCATAG.1	Epithelial cells	0.183733	non-Active	0.0415698	non-Active
P1_CTCGGGATCGGAATCT.1	Epithelial cells	0.114837	non-Active	3.52286e-05	non-Active
P1_CTCGGGATCTTTACGT.1	Epithelial cells	0.233802	non-Active	0.0198689	non-Active
P1_CTCGTACAGAGTAATC.1	Epithelial cells	0.13295	non-Active	0.0603466	non-Active
P1_CTCGTACCACAGTCGC.1	Macrophages	0.192573	non-Active	0.0500599	non-Active
P1_CTCGTACCATAGTAAG.1	CD8+ T-cells	0.15381	non-Active	0.113295	non-Active
P1_CTCGTACGTGCGGTAA.1	Epithelial cells	0.206674	non-Active	0.0969844	non-Active
P1_CTCGTACGTGCTCTTC.1	Epithelial cells	0.107693	non-Active	0.0455506	non-Active
P1_CTCGTACGTTTGTTTC.1	Epithelial cells	0.0682756	non-Active	0.0481575	non-Active
P1_CTCGTACTCCCTTGCA.1	Epithelial cells	0.0770571	non-Active	0.0276192	non-Active
P1_CTCGTACTCCGCGGTA.1	Epithelial cells	0.087078	non-Active	0.0455154	non-Active
P1_CTCGTACTCTAAGCCA.1	Epithelial cells	0.117866	non-Active	0.0656309	non-Active
P1_CTCGTACTCTGCCCTA.1	Epithelial cells	0.112253	non-Active	0.0632002	non-Active
P1_CTCGTCACAAGTCATC.1	Epithelial cells	0.102782	non-Active	0.0496724	non-Active
P1_CTCGTCACATGCTAGT.1	Epithelial cells	0.136809	non-Active	0.0423448	non-Active
P1_CTCGTCAGTAGTACCT.1	Epithelial cells	0.199308	non-Active	0.0453745	non-Active
P1_CTCGTCATCCAAACAC.1	Epithelial cells	0.110628	non-Active	0	non-Active
P1_CTCGTCATCCAAATGC.1	Epithelial cells	0.0832544	non-Active	0.00792644	non-Active
P1_CTCGTCATCGAATCCA.1	Epithelial cells	0.112464	non-Active	0.0544282	non-Active
P1_CTCTAATAGAAACCGC.1	Epithelial cells	0.178868	non-Active	0.0755654	non-Active
P1_CTCTAATAGTTAGGTA.1	Epithelial cells	0.11251	non-Active	0.0556612	non-Active
P1_CTCTAATCACGAAGCA.1	CD8+ T-cells	0.0814888	non-Active	0.0105334	non-Active
P1_CTCTAATCACTCTGTC.1	Epithelial cells	0.178436	non-Active	0.0667583	non-Active
P1_CTCTAATCAGGAATCG.1	B-cells	0.0831258	non-Active	0.000105686	non-Active
P1_CTCTAATGTACAGTGG.1	Epithelial cells	0.153155	non-Active	0.0414289	non-Active
P1_CTCTAATTCTGCAAGT.1	Epithelial cells	0.110932	non-Active	0.0469245	non-Active
P1_CTCTACGAGAATCTCC.1	Epithelial cells	0.199425	non-Active	0.111358	non-Active
P1_CTCTACGAGACAGACC.1	Fibroblasts	0.212813	non-Active	0.279434	Metabolism-Active
P1_CTCTACGAGAGCCTAG.1	Epithelial cells	0.0931935	non-Active	0.0529134	non-Active
P1_CTCTACGAGGCAAAGA.1	Epithelial cells	0.121187	non-Active	0.0483689	non-Active
P1_CTCTACGCAGTGGAGT.1	Epithelial cells	0.242853	non-Active	0.18407	Metabolism-Active
P1_CTCTACGGTGAGTGAC.1	Epithelial cells	0.108488	non-Active	0.0373424	non-Active
P1_CTCTACGGTTCAACCA.1	Myofibroblasts	0.213187	non-Active	0.149651	non-Active
P1_CTCTACGTCAGAGACG.1	Epithelial cells	0.139451	non-Active	0.0293102	non-Active
P1_CTCTACGTCCAAATGC.1	Monocytes	0.114323	non-Active	0.0550624	non-Active
P1_CTCTGGTAGATCGATA.1	Epithelial cells	0.227149	non-Active	0.086134	non-Active
P1_CTCTGGTCAAACCTAC.1	Epithelial cells	0.140983	non-Active	0.0585852	non-Active
P1_CTCTGGTCACGGCTAC.1	CD8+ T-cells	0.0999988	non-Active	0.0839498	non-Active
P1_CTCTGGTCATAGTAAG.1	Epithelial cells	0.183674	non-Active	0.0401959	non-Active
P1_CTCTGGTCATGCATGT.1	B-cells	0.112113	non-Active	0.0470655	non-Active
P1_CTCTGGTGTAGCCTCG.1	Epithelial cells	0.0999638	non-Active	0.0922286	non-Active
P1_CTCTGGTGTGTTTGGT.1	Epithelial cells	0.104968	non-Active	0.0413584	non-Active
P1_CTCTGGTTCATTGCGA.1	Epithelial cells	0.17577	non-Active	0.0559783	non-Active
P1_CTCTGGTTCCGCGCAA.1	Fibroblasts	0.247857	non-Active	0.258719	Metabolism-Active
P1_CTGAAACAGATGCCTT.1	Epithelial cells	0.135709	non-Active	0.0748608	non-Active
P1_CTGAAACAGCGAAGGG.1	Fibroblasts	0.187615	non-Active	0.136264	non-Active
P1_CTGAAACCACTTCTGC.1	Epithelial cells	0.110967	non-Active	0.0125062	non-Active
P1_CTGAAACCATATACCG.1	Myofibroblasts	0.235673	non-Active	0.0920172	non-Active
P1_CTGAAACGTAGAAAGG.1	Epithelial cells	0.0781913	non-Active	0	non-Active
P1_CTGAAACGTTCCACTC.1	Epithelial cells	0.110803	non-Active	0.0252942	non-Active
P1_CTGAAACGTTCTGAAC.1	Epithelial cells	0.14407	non-Active	0	non-Active
P1_CTGAAACTCCTCCTAG.1	Epithelial cells	0.13012	non-Active	0.0424505	non-Active
P1_CTGAAACTCTCAACTT.1	Epithelial cells	0.138317	non-Active	0.030508	non-Active
P1_CTGAAACTCTGTTTGT.1	Epithelial cells	0.136271	non-Active	0	non-Active
P1_CTGAAACTCTTAGCCC.1	Epithelial cells	0.118696	non-Active	0.0579863	non-Active
P1_CTGAAGTAGACAGACC.1	Epithelial cells	0.1391	non-Active	0.0415698	non-Active
P1_CTGAAGTCAGGAACGT.1	Myofibroblasts	0.152606	non-Active	0.0625661	non-Active
P1_CTGAAGTCAGTGAGTG.1	Epithelial cells	0.0955672	non-Active	0.0471359	non-Active
P1_CTGAAGTGTATTCTCT.1	Fibroblasts	0.177898	non-Active	0.127633	non-Active
P1_CTGAAGTGTCACAAGG.1	Epithelial cells	0.0795711	non-Active	0	non-Active
P1_CTGAAGTGTTCCCTTG.1	Epithelial cells	0.0904924	non-Active	0.0537237	non-Active
P1_CTGAAGTTCGACAGCC.1	Epithelial cells	0.121268	non-Active	0.0865568	non-Active
P1_CTGAAGTTCTCTTATG.1	Epithelial cells	0.134119	non-Active	0.0726414	non-Active
P1_CTGATAGAGACTAGGC.1	Epithelial cells	0.107319	non-Active	0.0698232	non-Active
P1_CTGATAGAGCGTTTAC.1	CD8+ T-cells	0.145286	non-Active	0.0480519	non-Active
P1_CTGATAGAGGCTCAGA.1	Epithelial cells	0.127162	non-Active	0.040055	non-Active
P1_CTGATAGGTCTCTTAT.1	Epithelial cells	0.0883175	non-Active	0.0836328	non-Active
P1_CTGATAGGTGTAACGG.1	Epithelial cells	0.120438	non-Active	0.0665821	non-Active
P1_CTGATAGTCCTAGAAC.1	Endothelial cells	0.223828	non-Active	0.104136	non-Active
P1_CTGATAGTCGATCCCT.1	Fibroblasts	0.214918	non-Active	0.21803	Metabolism-Active
P1_CTGATAGTCTGTACGA.1	Epithelial cells	0.0928661	non-Active	0	non-Active
P1_CTGATCCAGAAAGTGG.1	Epithelial cells	0.128448	non-Active	0.0492144	non-Active
P1_CTGATCCAGAGCAATT.1	Epithelial cells	0.129056	non-Active	0.0932854	non-Active
P1_CTGATCCAGGGCATGT.1	Epithelial cells	0.128553	non-Active	0.0717255	non-Active
P1_CTGATCCAGGTGACCA.1	Epithelial cells	0.163574	non-Active	0.061016	non-Active
P1_CTGATCCAGTTAAGTG.1	Epithelial cells	0.0958829	non-Active	0.0398788	non-Active
P1_CTGATCCCACCGCTAG.1	Epithelial cells	0.119678	non-Active	0.0573522	non-Active
P1_CTGATCCCATCGGACC.1	Monocytes	0.124051	non-Active	0.0493201	non-Active
P1_CTGATCCGTACATCCA.1	Endothelial cells	0.176378	non-Active	0.0591136	non-Active
P1_CTGATCCGTAGCGCTC.1	CD8+ T-cells	0.125536	non-Active	0.0392447	non-Active
P1_CTGATCCTCATGGTCA.1	Epithelial cells	0.105366	non-Active	0.0739449	non-Active
P1_CTGATCCTCTCGAGTA.1	Epithelial cells	0.136621	non-Active	0.0188825	non-Active
P1_CTGCCTAAGGCATTGG.1	Monocytes	0.142468	non-Active	0	non-Active
P1_CTGCCTAAGTAGGTGC.1	CD8+ T-cells	0.0986307	non-Active	0.0324103	non-Active
P1_CTGCCTAAGTCATGCT.1	CD8+ T-cells	0.120275	non-Active	0.0690834	non-Active
P1_CTGCCTACACTGAAGG.1	Fibroblasts	0.169935	non-Active	0.127387	non-Active
P1_CTGCCTACAGACGCCT.1	Epithelial cells	0.0990751	non-Active	0.0646445	non-Active
P1_CTGCCTAGTAACGCGA.1	CD8+ T-cells	0.11582	non-Active	0.0228634	non-Active
P1_CTGCCTAGTAAGCACG.1	Epithelial cells	0.131395	non-Active	0.0704925	non-Active
P1_CTGCCTAGTACGCTGC.1	CD8+ T-cells	0.0659019	non-Active	0.00690481	non-Active
P1_CTGCCTAGTCCAAGTT.1	Epithelial cells	0.136879	non-Active	0.0776791	non-Active
P1_CTGCCTAGTCTGCGGT.1	Epithelial cells	0.18088	non-Active	0.0463961	non-Active
P1_CTGCCTATCACGCGGT.1	Myofibroblasts	0.151436	non-Active	0.116078	non-Active
P1_CTGCCTATCACTGGGC.1	CD8+ T-cells	0.102677	non-Active	0	non-Active
P1_CTGCCTATCAGCTCTC.1	Endothelial cells	0.291718	OS-Active	0.0440358	non-Active
P1_CTGCCTATCTGGTATG.1	Endothelial cells	0.194935	non-Active	0.103396	non-Active
P1_CTGCCTATCTTCGGTC.1	Epithelial cells	0.112019	non-Active	0.0110266	non-Active
P1_CTGCGGAAGACTACAA.1	Epithelial cells	0.128635	non-Active	0.0807793	non-Active
P1_CTGCGGAAGAGGGCTT.1	Epithelial cells	0.198969	non-Active	0.101141	non-Active
P1_CTGCGGAAGAGGTAGA.1	Epithelial cells	0.108394	non-Active	0.0417812	non-Active
P1_CTGCGGACAACACCCG.1	Epithelial cells	0.118439	non-Active	0.119214	non-Active
P1_CTGCGGACACTTACGA.1	Epithelial cells	0.0812081	non-Active	0.00954696	non-Active
P1_CTGCGGACAGCTGTGC.1	B-cells	0.125829	non-Active	0.0509054	non-Active
P1_CTGCGGAGTCTAACGT.1	Epithelial cells	0.103273	non-Active	0.107377	non-Active
P1_CTGCGGATCCTCCTAG.1	Epithelial cells	0.117106	non-Active	0.045304	non-Active
P1_CTGCGGATCGTTACGA.1	CD8+ T-cells	0.0779925	non-Active	0.0975833	non-Active
P1_CTGCTGTAGCCCGAAA.1	CD8+ T-cells	0.115913	non-Active	0.0457268	non-Active
P1_CTGCTGTAGTACGTAA.1	CD8+ T-cells	0.0598333	non-Active	0	non-Active
P1_CTGCTGTCATGAGCGA.1	CD8+ T-cells	0.137148	non-Active	0.0964912	non-Active
P1_CTGCTGTGTTACAGAA.1	Epithelial cells	0.1152	non-Active	0.00324103	non-Active
P1_CTGCTGTTCACTTCAT.1	Epithelial cells	0.242829	non-Active	0.112873	non-Active
P1_CTGGTCTAGATCCTGT.1	B-cells	0.109201	non-Active	0.0497076	non-Active
P1_CTGGTCTCAGCCTTTC.1	Epithelial cells	0.123888	non-Active	0.102586	non-Active
P1_CTGGTCTCAGGGATTG.1	CD8+ T-cells	0.168929	non-Active	0.0263158	non-Active
P1_CTGGTCTCAGTAGAGC.1	CD8+ T-cells	0.0757475	non-Active	0.0168393	non-Active
P1_CTGGTCTCATATACCG.1	Epithelial cells	0.18413	non-Active	0.0748608	non-Active
P1_CTGGTCTGTGGCGAAT.1	B-cells	0.117176	non-Active	0.0230748	non-Active
P1_CTGGTCTTCCGCAAGC.1	Monocytes	0.158476	non-Active	0.0546396	non-Active
P1_CTGGTCTTCTTCTGGC.1	Epithelial cells	0.0928778	non-Active	0.0065173	non-Active
P1_CTGTGCTAGGACTGGT.1	Monocytes	0.237158	non-Active	0.0652434	non-Active
P1_CTGTGCTCAACTGGCC.1	Myofibroblasts	0.19145	non-Active	0.122455	non-Active
P1_CTGTGCTCACTCGACG.1	CD8+ T-cells	0.0753382	non-Active	0.0549919	non-Active
P1_CTGTGCTCAGGGTTAG.1	CD8+ T-cells	0.166754	non-Active	0.0842317	non-Active
P1_CTGTGCTCAGTCCTTC.1	Epithelial cells	0.167093	non-Active	0.0620024	non-Active
P1_CTGTGCTGTATTACCG.1	Epithelial cells	0.0826931	non-Active	0.038681	non-Active
P1_CTGTGCTGTCATCGGC.1	B-cells	0.141158	non-Active	0.00542521	non-Active
P1_CTGTGCTGTTTCGCTC.1	Epithelial cells	0.192701	non-Active	0.121433	non-Active
P1_CTGTGCTTCTACTCAT.1	Fibroblasts	0.239964	non-Active	0.207074	Metabolism-Active
P1_CTGTGCTTCTGCGGCA.1	Epithelial cells	0.11817	non-Active	0.0286761	non-Active
P1_CTGTTTAAGAATTGTG.1	Macrophages	0.248734	non-Active	0.0986402	non-Active
P1_CTGTTTAAGGCTAGGT.1	Epithelial cells	0.195917	non-Active	0.0615444	non-Active
P1_CTGTTTAAGTTTAGGA.1	Epithelial cells	0.0907964	non-Active	0.0172973	non-Active
P1_CTGTTTATCCAAAGTC.1	Epithelial cells	0.137311	non-Active	0.0362855	non-Active
P1_CTTAACTAGAAAGTGG.1	B-cells	0.14317	non-Active	0.112555	non-Active
P1_CTTAACTAGGGATACC.1	B-cells	0.126963	non-Active	0.0707391	non-Active
P1_CTTAACTCAAGCGTAG.1	Epithelial cells	0.115095	non-Active	0.0946241	non-Active
P1_CTTAACTCAAGTACCT.1	Epithelial cells	0.0927024	non-Active	0.0786655	non-Active
P1_CTTAACTCACATCCAA.1	Epithelial cells	0.129442	non-Active	0.0119777	non-Active
P1_CTTAACTGTACCGTTA.1	Epithelial cells	0.121549	non-Active	0.0347002	non-Active
P1_CTTAACTTCTACTCAT.1	Epithelial cells	0.0813251	non-Active	0.0122243	non-Active
P1_CTTACCGCACCGAAAG.1	Epithelial cells	0.135932	non-Active	0.0145494	non-Active
P1_CTTACCGCATTTGCTT.1	Epithelial cells	0.0953567	non-Active	0.0591136	non-Active
P1_CTTACCGGTTCCATGA.1	Epithelial cells	0.0575063	non-Active	0.0258226	non-Active
P1_CTTACCGTCAATAAGG.1	Epithelial cells	0.094889	non-Active	0.0252942	non-Active
P1_CTTACCGTCAGTCCCT.1	Epithelial cells	0.0848447	non-Active	0	non-Active
P1_CTTACCGTCCTCAATT.1	Macrophages	0.172601	non-Active	0.0528782	non-Active
P1_CTTACCGTCCTTTCTC.1	Myofibroblasts	0.263128	OS-Active	0.112485	non-Active
P1_CTTACCGTCGGCGCAT.1	Epithelial cells	0.160159	non-Active	0.0356514	non-Active
P1_CTTACCGTCTTTACGT.1	Epithelial cells	0.0946317	non-Active	0.054851	non-Active
P1_CTTAGGAAGGGTTTCT.1	CD8+ T-cells	0.100548	non-Active	0	non-Active
P1_CTTAGGACACCGCTAG.1	Epithelial cells	0.130752	non-Active	0.05855	non-Active
P1_CTTAGGACAGGACCCT.1	B-cells	0.0936846	non-Active	0.00419221	non-Active
P1_CTTAGGACATATGCTG.1	Epithelial cells	0.189696	non-Active	0.020186	non-Active
P1_CTTAGGATCCAAACTG.1	Monocytes	0.187451	non-Active	0.0801099	non-Active
P1_CTTAGGATCGGGAGTA.1	Macrophages	0.219385	non-Active	0.0349468	non-Active
P1_CTTCTCTAGCTAGCCC.1	Epithelial cells	0.13827	non-Active	0.0764461	non-Active
P1_CTTCTCTAGTAGCGGT.1	Epithelial cells	0.114077	non-Active	0	non-Active
P1_CTTCTCTCAACAACCT.1	Monocytes	0.187182	non-Active	0.0157472	non-Active
P1_CTTCTCTCAATTCCTT.1	Epithelial cells	0.110476	non-Active	0.0529134	non-Active
P1_CTTCTCTCACTCGACG.1	Epithelial cells	0.200559	non-Active	0.0391038	non-Active
P1_CTTCTCTGTAATCACC.1	Endothelial cells	0.242771	non-Active	0.0298034	non-Active
P1_CTTCTCTGTATGCTTG.1	Epithelial cells	0.122683	non-Active	0.0380117	non-Active
P1_CTTCTCTGTCCATCCT.1	Epithelial cells	0.194479	non-Active	0.067639	non-Active
P1_CTTCTCTGTCCGTTAA.1	Macrophages	0.197215	non-Active	0.0400197	non-Active
P1_CTTCTCTGTCTAAAGA.1	Epithelial cells	0.254815	non-Active	0.232368	Metabolism-Active
P1_CTTCTCTTCTGGTATG.1	Fibroblasts	0.221735	non-Active	0.331184	Metabolism-Active
[truncated: 20,796 more rows]

## Sheet: Active_OS_degs
gene	p_val	avg_log2FC	pct.1	pct.2	p_val_adj
STAB1	0	0.626508	0.264	0.038	0
CD4	0	0.56519	0.253	0.044	0
PLAUR	0	1.69262	0.592	0.179	0
DCN	0	1.56507	0.407	0.141	0
TYROBP	0	2.4431	0.513	0.168	0
CD74	0	2.30632	0.773	0.53	0
TYMP	0	1.13499	0.679	0.33	0
VIM	0	1.63562	0.979	0.547	0
GRN	0	1.24929	0.721	0.471	0
TIMP2	0	0.948725	0.67	0.296	0
VCAN	0	0.87595	0.327	0.07	0
MSR1	0	0.677601	0.198	0.014	0
CAPG	0	1.09161	0.471	0.169	0
LCP2	0	0.500289	0.269	0.042	0
DKK3	0	0.514855	0.327	0.083	0
CYBA	0	1.16066	0.835	0.414	0
SLC2A3	0	0.740979	0.537	0.168	0
YBX3	0	0.841922	0.689	0.406	0
RPL18	0	-0.603381	0.999	0.998	0
SPI1	0	0.771151	0.293	0.051	0
RHOA	0	0.656227	0.911	0.751	0
TPD52	0	-0.695302	0.12	0.497	0
CXCL2	0	1.91537	0.644	0.289	0
MEF2C	0	0.590309	0.399	0.11	0
RPS5	0	-1.14617	0.998	0.997	0
PPP1R15A	0	0.766235	0.937	0.777	0
FTL	0	1.98956	0.999	0.997	0
MMP2	0	0.811806	0.33	0.075	0
RPL6	0	-0.611106	0.997	0.997	0
RPLP0	0	-0.885813	0.995	0.989	0
ICAM1	0	1.12103	0.561	0.159	0
LYZ	0	2.63132	0.369	0.101	0
TREM2	0	0.569815	0.164	0.01	0
LGALS1	0	1.70845	0.968	0.587	0
TIMP3	0	0.878552	0.476	0.183	0
HMOX1	0	1.20376	0.34	0.088	0
RPL3	0	-0.682935	0.999	0.999	0
NFKBIA	0	1.58468	0.951	0.754	0
CST3	0	1.63941	0.985	0.805	0
PCSK1N	0	-1.33591	0.163	0.558	0
TIMP1	0	1.98687	0.93	0.536	0
TNFSF13B	0	0.794289	0.344	0.051	0
TGFB1	0	0.583232	0.555	0.171	0
RPS19	0	-0.738021	1	1	0
TMEM176B	0	1.33973	0.536	0.174	0
AEBP1	0	0.924263	0.407	0.111	0
ENG	0	0.867017	0.47	0.102	0
CXCL12	0	0.639768	0.251	0.04	0
MAP3K8	0	0.773542	0.49	0.161	0
CCL2	0	1.55014	0.614	0.279	0
COL1A1	0	1.9662	0.471	0.175	0
PMP22	0	0.845347	0.581	0.136	0
NFKB1	0	0.8842	0.577	0.247	0
SOD3	0	1.028	0.408	0.135	0
CTSC	0	1.27525	0.584	0.151	0
MS4A6A	0	1.46419	0.298	0.043	0
MS4A4A	0	0.704347	0.213	0.016	0
KRT18	0	-1.64372	0.307	0.695	0
MGP	0	1.8935	0.846	0.557	0
ARHGDIB	0	0.596746	0.736	0.347	0
SOD2	0	1.49172	0.742	0.461	0
CD83	0	1.26496	0.532	0.229	0
SPARC	0	1.65398	0.611	0.209	0
PDGFRB	0	0.597085	0.322	0.073	0
GNAI2	0	0.847105	0.689	0.382	0
RPS15	0	-0.820476	1	1	0
PLEK	0	1.04896	0.27	0.036	0
NFE2L2	0	0.665785	0.757	0.463	0
PRRX1	0	0.550022	0.303	0.068	0
NRP2	0	0.535757	0.38	0.107	0
TNFAIP3	0	1.12699	0.7	0.317	0
CTGF	0	1.30329	0.437	0.137	0
NR4A3	0	0.916415	0.507	0.187	0
NPC2	0	1.25855	0.867	0.655	0
EPCAM	0	-1.29022	0.128	0.586	0
DUSP1	0	1.23715	0.932	0.622	0
PLXDC2	0	0.628753	0.386	0.068	0
HSPH1	0	0.874354	0.937	0.777	0
TGFBI	0	0.91413	0.455	0.085	0
INHBA	0	1.05785	0.345	0.082	0
SRGN	0	1.17172	0.726	0.381	0
MMP19	0	0.502079	0.192	0.023	0
LRP1	0	0.687775	0.432	0.119	0
RPS10	0	-0.886756	0.984	0.979	0
AHNAK	0	0.656156	0.68	0.338	0
MT2A	0	1.42448	0.945	0.763	0
IL1B	0	2.2319	0.285	0.068	0
FOSB	0	1.19145	0.976	0.791	0
CD93	0	0.764096	0.269	0.053	0
GNG11	0	0.904846	0.461	0.141	0
FGL2	0	0.790171	0.317	0.046	0
ISLR	0	0.635557	0.268	0.058	0
CD68	0	1.53765	0.449	0.097	0
FOXA1	0	-0.821308	0.048	0.426	0
APOE	0	3.35105	0.548	0.206	0
RPL36	0	-0.744667	0.999	0.999	0
BST2	0	0.94436	0.752	0.304	0
SH3BGRL	0	0.79503	0.765	0.288	0
LGALS3	0	0.842257	0.787	0.36	0
DNAJB1	0	0.928187	0.991	0.919	0
SERPINF1	0	1.25908	0.491	0.125	0
KDM6B	0	0.901822	0.74	0.452	0
RAB25	0	-0.87683	0.095	0.54	0
TPT1	0	0.868997	1	0.997	0
BHLHE40	0	0.695141	0.572	0.228	0
EMP1	0	0.978985	0.465	0.167	0
COL4A2	0	1.10287	0.451	0.137	0
ANXA1	0	0.783363	0.863	0.375	0
SDS	0	0.771532	0.158	0.015	0
CD63	0	0.900499	0.986	0.888	0
STX11	0	0.557579	0.333	0.079	0
ITM2B	0	1.20435	0.971	0.791	0
GPNMB	0	1.12965	0.361	0.064	0
GYPC	0	0.523068	0.542	0.188	0
IER3	0	1.77117	0.833	0.414	0
SLCO2B1	0	0.626845	0.222	0.016	0
SULF1	0	0.766504	0.301	0.075	0
LUM	0	1.60697	0.367	0.114	0
BCL2A1	0	1.52457	0.399	0.092	0
IGSF6	0	0.538106	0.166	0.015	0
RPS2	0	-1.08839	0.998	0.997	0
IGFBP4	0	1.50117	0.619	0.219	0
IFITM3	0	1.48044	0.94	0.539	0
COL6A2	0	1.04492	0.486	0.189	0
EMP3	0	0.820633	0.712	0.307	0
KLK3	0	-2.86311	0.063	0.451	0
C1orf162	0	0.735972	0.313	0.056	0
FCGR2A	0	1.33775	0.351	0.046	0
ABL2	0	0.94691	0.548	0.234	0
MSN	0	0.670351	0.641	0.252	0
TACC1	0	0.632096	0.584	0.248	0
STOM	0	0.771678	0.559	0.185	0
GSN	0	1.36069	0.787	0.358	0
SERPING1	0	1.16525	0.66	0.205	0
RPS3	0	-0.690345	0.999	0.998	0
TM7SF2	0	-0.853042	0.057	0.467	0
IL18	0	0.554995	0.279	0.055	0
BAG3	0	0.977401	0.721	0.338	0
SPARCL1	0	1.07594	0.504	0.17	0
DAB2	0	0.853132	0.455	0.081	0
NR4A2	0	0.841347	0.604	0.282	0
THY1	0	1.02243	0.359	0.086	0
LY96	0	0.744459	0.433	0.094	0
VSIG4	0	0.519962	0.158	0.01	0
RPL30	0	-0.610758	0.999	0.999	0
FCER1G	0	1.86618	0.482	0.122	0
PRAC1	0	-1.57652	0.084	0.487	0
HOXB13	0	-0.655635	0.037	0.409	0
C1QC	0	2.41446	0.292	0.05	0
C1R	0	1.00645	0.426	0.15	0
LMNA	0	0.995237	0.892	0.644	0
RPL8	0	-0.541367	1	0.999	0
COX7A1	0	0.84814	0.506	0.127	0
CYGB	0	0.674304	0.295	0.06	0
LAPTM5	0	1.26804	0.55	0.231	0
DNAJB4	0	0.627456	0.536	0.225	0
CTSS	0	1.27042	0.462	0.136	0
S100A11	0	0.969689	0.987	0.692	0
COL6A3	0	0.835918	0.307	0.076	0
FSTL1	0	0.977245	0.477	0.156	0
ELF3	0	-1.66301	0.155	0.613	0
IGFBP7	0	2.23461	0.809	0.425	0
CXCL3	0	1.86402	0.495	0.189	0
ANXA5	0	0.826366	0.779	0.493	0
COL1A2	0	1.78335	0.484	0.157	0
CTSB	0	1.91491	0.789	0.371	0
GEM	0	1.26614	0.468	0.151	0
CYBB	0	0.656879	0.221	0.021	0
CLDN3	0	-1.35166	0.116	0.567	0
HTRA1	0	0.706076	0.384	0.11	0
B2M	0	0.973673	1	0.944	0
NNMT	0	1.03508	0.488	0.169	0
MS4A7	0	1.39183	0.281	0.049	0
TPM4	0	0.919181	0.817	0.452	0
AXL	0	0.553212	0.347	0.065	0
LAIR1	0	0.574742	0.253	0.032	0
C19orf48	0	-1.37354	0.227	0.59	0
FILIP1L	0	0.837945	0.453	0.101	0
RAB31	0	0.782599	0.487	0.103	0
COL3A1	0	1.56321	0.444	0.132	0
VAMP5	0	1.09934	0.721	0.239	0
LGALS9	0	0.581961	0.408	0.102	0
RNASE6	0	0.576355	0.216	0.031	0
ZEB2	0	0.651698	0.465	0.091	0
HINT1	0	-0.647996	0.907	0.941	0
KRT8	0	-1.36509	0.321	0.689	0
CD14	0	1.24181	0.27	0.032	0
RPS21	0	-0.593296	0.998	0.995	0
RPS7	0	-0.640334	0.996	0.996	0
PRNP	0	0.808368	0.66	0.368	0
HSPA6	0	1.3624	0.643	0.294	0
MZT2A	0	-1.13586	0.543	0.762	0
C1QB	0	2.93945	0.321	0.08	0
C1QA	0	2.92332	0.332	0.083	0
OLR1	0	0.625471	0.158	0.015	0
MARCKSL1	0	-1.38222	0.536	0.762	0
A2M	0	1.43522	0.665	0.18	0
SPHK1	0	0.504215	0.386	0.089	0
CD163	0	0.680476	0.194	0.014	0
KCTD12	0	0.920036	0.402	0.091	0
THBD	0	0.84527	0.312	0.062	0
HLA-DQB1	0	1.55388	0.425	0.147	0
CLDN7	0	-1.08704	0.129	0.572	0
C1S	0	1.00623	0.385	0.118	0
BGN	0	1.73603	0.518	0.181	0
CSF1R	0	0.699644	0.232	0.022	0
ANXA2	0	0.853525	0.82	0.473	0
SOCS3	0	1.05361	0.638	0.319	0
IFITM2	0	1.0071	0.912	0.468	0
LILRB4	0	0.593459	0.204	0.018	0
C11orf96	0	1.30804	0.569	0.266	0
COL4A1	0	1.0757	0.415	0.116	0
LITAF	0	1.03751	0.763	0.496	0
PLAC9	0	0.97335	0.438	0.132	0
CLDN4	0	-1.43291	0.234	0.638	0
HLA-DRB1	0	2.17925	0.538	0.253	0
HLA-DQA1	0	1.74904	0.4	0.107	0
SERPINA1	0	0.830557	0.248	0.044	0
C5AR1	0	1.03107	0.266	0.038	0
PSAP	0	1.78484	0.915	0.717	0
RPS4X	0	-0.774777	0.998	0.997	0
HLA-DRB5	0	1.52029	0.454	0.173	0
RPL39	0	-0.721691	0.999	0.999	0
FCGR3A	0	1.19653	0.252	0.029	0
HLA-DMA	0	1.28013	0.465	0.181	0
HSPA1B	0	1.26304	0.954	0.769	0
HSPA1A	0	1.50268	0.998	0.754	0
AIF1	0	2.03103	0.381	0.08	0
LST1	0	1.27048	0.356	0.072	0
HLA-C	0	0.758668	0.983	0.723	0
HLA-E	0	0.936129	0.925	0.568	0
TMSB4X	0	1.05763	0.999	0.952	0
HLA-A	0	0.744078	0.99	0.712	0
TSTD1	0	-1.33041	0.337	0.739	0
RPL41	0	-0.622737	1	1	0
HLA-DPA1	0	2.17979	0.579	0.25	0
RPS18	0	-0.986576	1	1	0
HLA-B	0	1.0268	0.989	0.704	0
HLA-DMB	0	1.04877	0.323	0.063	0
MTRNR2L8	0	0.914064	0.759	0.487	0
SMIM3	0	0.526594	0.394	0.118	0
PECAM1	0	0.759971	0.287	0.068	0
CD24	0	-1.20601	0.201	0.559	0
REX1BD	0	0.614411	0.603	0.205	0
CAVIN3	0	0.873777	0.422	0.098	0
CAVIN1	0	0.845378	0.479	0.153	0
CYTOR	0	0.994142	0.594	0.177	0
SELENOP	0	1.71869	0.454	0.174	0
AC020656.1	0	0.572168	0.153	0.013	0
CCL3L1	0	2.52794	0.193	0.025	0
HLA-DPB1	8.34858e-308	2.07686	0.595	0.311	2.51075e-303
CTSK	6.65556e-307	0.668882	0.294	0.074	2.00159e-302
COL15A1	7.07099e-307	0.552721	0.25	0.052	2.12653e-302
TAGLN	3.10698e-306	1.43013	0.533	0.234	9.34393e-302
THBS1	3.58904e-306	0.776301	0.414	0.145	1.07937e-301
TAGLN2	1.58019e-305	0.657141	0.9	0.604	4.75227e-301
CTSL	9.84777e-305	1.13844	0.554	0.275	2.96162e-300
APOC1	7.06925e-304	3.02897	0.453	0.192	2.12601e-299
IGFBP5	1.36275e-303	1.82637	0.441	0.167	4.09834e-299
DPYSL2	1.88678e-303	0.563568	0.478	0.193	5.67431e-299
PTGS2	8.65588e-303	0.849509	0.428	0.154	2.60317e-298
TPP1	1.93862e-301	0.658597	0.505	0.223	5.8302e-297
CTSD	4.06708e-301	1.75543	0.768	0.549	1.22313e-296
HLA-DRA	2.47334e-300	2.47977	0.623	0.356	7.43833e-296
ARPC1B	7.15396e-300	0.682492	0.698	0.396	2.15148e-295
PLK3	7.9518e-300	0.570917	0.481	0.191	2.39142e-295
AKR1B1	2.23105e-299	0.548691	0.397	0.129	6.70965e-295
RNASE1	1.67908e-298	1.48417	0.321	0.093	5.04967e-294
SNRPE	2.51836e-298	-0.886544	0.701	0.792	7.57371e-294
RPL7A	2.6408e-297	-0.530644	0.999	0.998	7.94195e-293
FOLR2	4.53211e-297	0.698351	0.143	0.016	1.36299e-292
CFLAR	1.46364e-296	0.859011	0.602	0.327	4.40175e-292
PRELP	3.35594e-296	0.588232	0.247	0.053	1.00927e-291
ZFP36L1	5.43496e-296	0.761706	0.833	0.531	1.63451e-291
ELN	7.68001e-296	0.518626	0.262	0.06	2.30969e-291
COL5A1	1.31334e-295	0.507534	0.252	0.056	3.94975e-291
SNHG7	2.44837e-294	-0.881852	0.429	0.701	7.36324e-290
S100A4	2.56254e-294	0.858298	0.775	0.434	7.7066e-290
GGT5	8.31653e-294	0.557504	0.282	0.068	2.50111e-289
LAMA4	1.36568e-292	0.500688	0.314	0.084	4.10714e-288
TMSB10	2.71416e-292	0.745201	0.999	0.997	8.16257e-288
C15orf48	2.10449e-291	1.22894	0.292	0.08	6.32903e-287
TCF4	4.08391e-290	0.715851	0.548	0.244	1.2282e-285
SNHG19	4.38273e-289	-1.0331	0.279	0.599	1.31806e-284
IFI27L2	3.53376e-286	0.565528	0.702	0.386	1.06274e-281
COL8A1	3.49025e-285	0.677634	0.253	0.058	1.04966e-280
MFAP4	4.69267e-285	0.823241	0.297	0.078	1.41127e-280
CCL3	3.43473e-284	3.51846	0.395	0.15	1.03296e-279
CD59	4.36396e-284	0.747857	0.727	0.465	1.31242e-279
SELENOK	5.14654e-284	0.819945	0.737	0.412	1.54777e-279
PLTP	1.97387e-283	0.797861	0.353	0.116	5.93621e-279
PHLDA1	1.27985e-282	0.830955	0.708	0.389	3.84903e-278
C3	1.50583e-282	0.948017	0.288	0.077	4.52864e-278
DCXR	2.59916e-282	-0.854752	0.408	0.678	7.81672e-278
IL6	8.86826e-282	0.934141	0.22	0.045	2.66704e-277
RPL12	4.12702e-281	-0.648054	1	0.999	1.24116e-276
QKI	5.59676e-280	0.541884	0.491	0.215	1.68317e-275
KLK2	2.33351e-279	-1.97687	0.057	0.389	7.0178e-275
THBS2	1.97056e-278	0.597817	0.225	0.047	5.92628e-274
FN1	2.4575e-278	1.19202	0.52	0.242	7.39068e-274
PLPP2	2.9478e-278	-0.682843	0.117	0.463	8.8652e-274
EEF1A2	3.45631e-278	-0.924462	0.031	0.361	1.03945e-273
RPSA	4.49442e-278	-0.602237	0.992	0.991	1.35165e-273
TPM2	8.79958e-278	1.31831	0.492	0.214	2.64638e-273
IGFBP6	9.87309e-277	1.01459	0.406	0.147	2.96923e-272
REL	1.66491e-276	0.975309	0.681	0.428	5.00704e-272
MZT2B	3.43311e-276	-0.890803	0.707	0.816	1.03247e-271
LIMS1	4.54025e-276	0.6822	0.61	0.334	1.36543e-271
CD44	1.74057e-275	0.87737	0.667	0.363	5.23459e-271
FCGRT	2.12918e-275	1.02911	0.754	0.548	6.40329e-271
LSM7	3.22991e-275	-0.871643	0.696	0.802	9.71362e-271
GADD45B	1.87366e-272	0.835485	0.874	0.639	5.63484e-268
HLA-DQA2	8.76412e-272	0.66126	0.238	0.054	2.63572e-267
PDLIM3	4.9615e-271	0.541274	0.29	0.079	1.49212e-266
DNAJA4	1.7429e-270	0.655813	0.484	0.211	5.24159e-266
GAS6	2.81505e-270	0.57112	0.467	0.195	8.46599e-266
KRTCAP3	1.37439e-269	-0.529758	0.063	0.406	4.13334e-265
S100A6	2.16893e-268	0.551244	0.974	0.727	6.52283e-264
TGFBR2	5.48768e-266	0.553066	0.373	0.125	1.65037e-261
PODXL2	2.74979e-265	-0.574722	0.071	0.404	8.26971e-261
SH3BGRL3	4.46154e-265	0.687153	0.953	0.889	1.34176e-260
ITGB2	5.70513e-265	0.788511	0.324	0.099	1.71576e-260
COL6A1	6.34917e-265	0.771527	0.419	0.163	1.90945e-260
MESP1	2.21009e-264	-0.666849	0.044	0.37	6.64663e-260
CRYAB	2.97916e-263	1.19467	0.442	0.18	8.95953e-259
ACP5	8.87954e-263	0.578152	0.279	0.077	2.67043e-258
CD99	8.93726e-262	0.671489	0.857	0.693	2.68779e-257
CAV1	3.63935e-261	0.765333	0.398	0.142	1.0945e-256
ANAPC11	9.82183e-261	-0.794611	0.769	0.815	2.95382e-256
MYL9	1.02768e-259	1.29248	0.525	0.251	3.09066e-255
SERPINE1	2.12707e-259	0.695172	0.28	0.077	6.39695e-255
SERPINH1	3.19846e-259	0.824437	0.623	0.358	9.61905e-255
HEBP2	8.45073e-259	-0.767631	0.417	0.672	2.54147e-254
MAL2	9.70097e-259	-0.609357	0.066	0.396	2.91747e-254
COX6A1	2.81052e-257	-0.647648	0.892	0.896	8.45235e-253
HPN	9.53573e-256	-0.530449	0.029	0.342	2.86777e-251
MIR4435-2HG	1.06153e-254	0.673124	0.481	0.208	3.19244e-250
NDUFV3	3.78027e-254	-0.832328	0.285	0.585	1.13688e-249
MEG3	3.92649e-254	0.652106	0.296	0.087	1.18085e-249
F2R	2.3074e-253	0.578915	0.283	0.08	6.93929e-249
ARPC2	2.63451e-253	0.55886	0.915	0.785	7.92302e-249
ODC1	1.0812e-252	-1.21774	0.441	0.668	3.25159e-248
SFRP4	1.74477e-252	1.04653	0.248	0.063	5.24722e-248
FXYD5	2.26697e-252	0.707332	0.728	0.439	6.8177e-248
SEZ6L2	2.87799e-252	-0.745396	0.1	0.428	8.65526e-248
CXCL8	1.2063e-251	1.94214	0.597	0.333	3.62781e-247
TSPAN4	3.96334e-251	0.545122	0.457	0.201	1.19194e-246
AR	4.47636e-250	-2.34873	0.218	0.499	1.34622e-245
CRTAP	1.98709e-249	0.522932	0.569	0.308	5.97597e-245
HIST3H2A	3.11634e-249	-0.752886	0.18	0.501	9.37209e-245
SLC38A11	6.19877e-249	-0.988378	0.036	0.344	1.86422e-244
CCDC80	8.87425e-249	0.770352	0.317	0.099	2.66884e-244
FOSL2	6.80739e-248	0.649908	0.621	0.352	2.04726e-243
FTH1	9.38479e-246	0.863549	1	0.999	2.82238e-241
PLAU	9.69705e-246	0.547211	0.278	0.079	2.91629e-241
CENPV	2.03599e-242	-0.556075	0.053	0.36	6.12304e-238
PPP1R14B	3.20786e-242	-1.0713	0.435	0.658	9.64733e-238
CKB	2.60096e-240	-1.93929	0.293	0.543	7.82213e-236
POSTN	2.43368e-238	0.855138	0.224	0.054	7.31906e-234
TPSB2	2.99062e-238	1.70381	0.44	0.179	8.99398e-234
PRDX2	1.07952e-237	-1.04998	0.594	0.759	3.24654e-233
EFEMP2	1.56816e-236	0.512705	0.343	0.121	4.71608e-232
LIPA	3.96397e-236	0.659182	0.33	0.117	1.19212e-231
MRPS26	6.77221e-234	-0.670387	0.314	0.6	2.03667e-229
MXRA8	1.67701e-233	0.559787	0.313	0.102	5.04343e-229
FAM110B	4.12719e-233	-1.18927	0.091	0.388	1.24121e-228
SPDEF	6.57299e-233	-0.648763	0.027	0.317	1.97676e-228
TIMM13	5.04535e-232	-1.0948	0.637	0.75	1.51734e-227
PDLIM7	2.50315e-231	0.598142	0.447	0.198	7.52796e-227
SNRPD2	9.05649e-230	-0.573635	0.887	0.917	2.72365e-225
ACTA2	1.15309e-228	1.33771	0.393	0.154	3.46781e-224
GSTO1	2.53747e-228	0.562942	0.655	0.407	7.63118e-224
SELENOM	3.60497e-228	0.981569	0.555	0.301	1.08416e-223
SGK1	8.27247e-228	0.897219	0.527	0.287	2.48786e-223
TSC22D1	8.77743e-228	0.962634	0.755	0.564	2.63972e-223
FRZB	9.52592e-227	0.509849	0.235	0.06	2.86482e-222
EPAS1	2.18085e-226	0.71498	0.424	0.184	6.5587e-222
IER5	1.01692e-225	0.682063	0.614	0.363	3.05828e-221
RARRES2	1.5926e-225	1.17341	0.43	0.189	4.78958e-221
HMGN1	1.97235e-224	-0.723531	0.785	0.849	5.93164e-220
TSPAN13	3.73098e-224	-0.747601	0.179	0.501	1.12206e-219
SOX4	9.17983e-222	-1.42698	0.569	0.732	2.76074e-217
RASSF4	1.77712e-221	0.516003	0.251	0.075	5.3445e-217
BEX2	2.04104e-221	-0.54545	0.116	0.429	6.13822e-217
OCIAD2	2.15634e-220	-0.645236	0.314	0.621	6.48498e-216
PALLD	5.67862e-220	0.553782	0.393	0.162	1.70779e-215
LTBP4	8.0196e-220	0.636764	0.384	0.155	2.41181e-215
AKAP13	1.0576e-219	0.512625	0.614	0.347	3.18062e-215
SMIM22	1.12272e-219	-0.838166	0.087	0.374	3.37646e-215
TGM2	1.54371e-219	0.542751	0.369	0.139	4.64256e-215
NAMPT	7.58087e-219	1.00545	0.617	0.407	2.27987e-214
PYCR1	2.07881e-218	-0.522799	0.119	0.423	6.25181e-214
SQSTM1	2.31479e-218	0.605752	0.893	0.757	6.9615e-214
GPR183	8.07783e-218	1.06066	0.317	0.11	2.42933e-213
CRNDE	1.80397e-217	-0.508779	0.133	0.447	5.42526e-213
HSPB1	2.64533e-217	0.811259	0.987	0.944	7.95557e-213
CCDC167	2.80676e-217	-0.702189	0.257	0.538	8.44104e-213
PYCARD	4.75744e-217	0.574316	0.551	0.282	1.43075e-212
PTN	6.54448e-217	0.809226	0.246	0.069	1.96819e-212
EFEMP1	1.1707e-213	0.524524	0.199	0.047	3.52076e-209
FLNA	1.93046e-212	0.711325	0.611	0.373	5.80567e-208
MGAT1	5.45666e-212	0.647547	0.533	0.301	1.64104e-207
IFI27	9.40611e-212	0.660958	0.624	0.329	2.82879e-207
LHFPL6	5.42288e-210	0.552531	0.294	0.098	1.63088e-205
RCAN1	3.3913e-209	0.70423	0.326	0.124	1.0199e-204
HSPG2	2.88584e-208	0.963334	0.359	0.143	8.67887e-204
APOD	3.06277e-208	2.05593	0.506	0.268	9.21097e-204
STMN1	1.0554e-207	-1.28459	0.376	0.622	3.174e-203
RNF130	1.88585e-207	0.703006	0.556	0.339	5.67152e-203
KLF6	8.15685e-206	0.846301	0.854	0.711	2.45309e-201
DUSP6	1.30402e-205	0.782834	0.4	0.18	3.9217e-201
MFGE8	1.59387e-205	0.683373	0.448	0.212	4.7934e-201
PEA15	4.90162e-205	0.570644	0.614	0.399	1.47411e-200
CEBPB	1.26398e-204	0.87652	0.696	0.514	3.8013e-200
MPC2	7.04831e-204	-0.74654	0.56	0.707	2.11971e-199
ITGB1	1.85639e-203	0.710378	0.736	0.572	5.5829e-199
THAP2	7.14004e-203	0.733885	0.383	0.169	2.14729e-198
TBX3	1.63649e-201	-0.75734	0.185	0.47	4.92157e-197
RHOG	3.25761e-201	0.500977	0.56	0.306	9.79694e-197
PCOLCE	2.04873e-200	0.808147	0.357	0.148	6.16135e-196
TSPAN8	2.25774e-200	-1.16846	0.075	0.341	6.78993e-196
FXYD3	5.07119e-200	-0.935205	0.205	0.491	1.52511e-195
PPDPF	6.82535e-200	-0.759581	0.869	0.9	2.05266e-195
MPP6	1.72302e-199	-0.594891	0.033	0.294	5.18182e-195
PPP1R14A	1.90316e-198	0.764091	0.267	0.083	5.72357e-194
F13A1	1.98678e-198	0.629933	0.138	0.025	5.97504e-194
RRAD	1.01105e-197	0.590121	0.251	0.076	3.04062e-193
ATP6V0E2	1.68001e-197	-0.500327	0.126	0.413	5.05246e-193
MYLK	2.13548e-197	0.614437	0.282	0.094	6.42225e-193
UQCC3	2.29977e-197	-0.599188	0.278	0.556	6.91634e-193
BIRC3	1.4854e-196	0.84357	0.537	0.272	4.4672e-192
TMEM238	2.22595e-196	-1.14437	0.053	0.313	6.69433e-192
LGMN	3.06894e-195	0.965054	0.395	0.186	9.22952e-191
ZG16B	2.32522e-194	-0.669995	0.064	0.329	6.99286e-190
WWTR1	2.33355e-194	0.572229	0.38	0.168	7.01791e-190
FOLH1	5.62506e-193	-0.805654	0.025	0.277	1.69168e-188
DUS1L	8.68599e-193	-0.550244	0.208	0.489	2.61223e-188
ID2	2.92134e-192	1.01434	0.762	0.541	8.78564e-188
SDCBP	3.30324e-192	0.656935	0.76	0.589	9.93415e-188
RPL36A	1.12652e-191	-0.710709	0.916	0.921	3.38789e-187
PLIN2	1.30306e-191	0.790775	0.471	0.24	3.91882e-187
ASAH1	9.18584e-191	0.754549	0.614	0.402	2.76255e-186
CDKN1A	1.55582e-190	0.706601	0.816	0.608	4.67896e-186
ZFP36	2.71384e-190	0.719285	0.846	0.674	8.16159e-186
G0S2	3.4326e-190	2.41872	0.39	0.185	1.03232e-185
ZNF385B	4.47611e-190	-0.52201	0.027	0.277	1.34614e-185
COL18A1	6.17431e-189	0.738142	0.482	0.242	1.85686e-184
CHMP1B	9.68371e-187	0.729513	0.594	0.381	2.91228e-182
CTSZ	1.22173e-185	1.25945	0.596	0.416	3.67422e-181
POLD2	6.44084e-185	-0.551033	0.269	0.534	1.93702e-180
C6orf15	1.10942e-184	-1.7824	0.545	0.226	3.33647e-180
SFRP2	1.19074e-184	1.16538	0.202	0.055	3.58103e-180
SNRPD1	2.92522e-184	-0.645021	0.599	0.723	8.7973e-180
ELL2	3.33575e-184	0.518494	0.451	0.227	1.00319e-179
UBE2M	1.09302e-183	-0.784532	0.276	0.529	3.28716e-179
MRPL12	5.17111e-183	-0.641043	0.349	0.585	1.55516e-178
CUTA	1.28666e-182	-0.717565	0.776	0.83	3.86951e-178
GTF2H5	1.59339e-180	-0.617666	0.42	0.634	4.79196e-176
PPP1R1B	4.22125e-180	-0.608727	0.055	0.306	1.2695e-175
TCEAL9	6.9576e-179	0.590747	0.515	0.285	2.09243e-174
S100A9	1.26832e-178	1.51687	0.216	0.065	3.81434e-174
CCL4L2	2.42089e-178	2.22579	0.286	0.111	7.28057e-174
TMEFF2	3.28336e-178	-1.00511	0.03	0.267	9.87439e-174
MRPS33	2.57565e-177	-0.556463	0.384	0.615	7.74601e-173
MYH9	1.02567e-176	0.540548	0.594	0.378	3.0846e-172
JUNB	3.58987e-176	0.611508	0.958	0.869	1.07962e-171
RAN	1.45924e-172	-0.680621	0.838	0.873	4.38852e-168
UQCR10	3.02682e-172	-0.512894	0.843	0.854	9.10287e-168
CXCL14	9.71548e-171	1.83629	0.22	0.069	2.92183e-166
HPGDS	2.22663e-170	0.545721	0.161	0.037	6.69638e-166
MT1E	4.45589e-169	0.597151	0.567	0.302	1.34006e-164
RPS4Y1	4.84145e-169	-0.560049	0.878	0.917	1.45602e-164
ZFAS1	4.33135e-168	-0.569666	0.887	0.895	1.30261e-163
PLEKHJ1	4.6862e-168	-0.550526	0.28	0.532	1.40933e-163
ALOX5AP	6.46409e-168	0.68935	0.326	0.129	1.94401e-163
CXCL16	7.28168e-168	0.598985	0.411	0.211	2.18989e-163
EHD1	2.25095e-167	0.537533	0.422	0.215	6.76951e-163
PCBD1	1.31285e-166	-0.577258	0.561	0.713	3.94827e-162
ESM1	9.28117e-166	0.522385	0.135	0.027	2.79122e-161
COX6C	4.79326e-165	-0.65598	0.933	0.913	1.44153e-160
NINJ1	6.70519e-165	0.822286	0.613	0.448	2.01652e-160
SNRPF	9.94947e-165	-0.579556	0.67	0.767	2.9922e-160
NKX3-1	1.08608e-162	-0.868607	0.094	0.331	3.26628e-158
ACTB	1.34095e-162	0.611194	0.995	0.98	4.03277e-158
RAB4A	4.43714e-161	-0.583128	0.387	0.602	1.33442e-156
POLR1D	7.60889e-161	-0.531017	0.624	0.753	2.2883e-156
SRSF9	9.62567e-161	-0.602774	0.519	0.679	2.89482e-156
TMPRSS2	9.94452e-161	-0.574644	0.026	0.246	2.99072e-156
CCL4	2.04267e-160	2.18782	0.403	0.21	6.14313e-156
SSR2	2.54467e-160	-0.567377	0.804	0.86	7.65283e-156
MYO6	3.96061e-160	-0.850469	0.158	0.397	1.19111e-155
ATOX1	2.49168e-159	0.571131	0.844	0.728	7.49349e-155
RGS1	2.60869e-159	0.666365	0.455	0.23	7.84537e-155
PAFAH1B3	6.48376e-159	-0.577052	0.255	0.498	1.94993e-154
CNPY2	1.18431e-158	-0.534077	0.547	0.701	3.5617e-154
CXCL9	1.89547e-156	0.839657	0.108	0.019	5.70044e-152
NR4A1	1.70648e-155	0.65747	0.788	0.606	5.13205e-151
MAFF	4.0339e-155	0.546714	0.622	0.429	1.21315e-150
LGALS3BP	1.02709e-154	0.562377	0.518	0.293	3.08887e-150
ACP1	3.64888e-153	-0.534753	0.426	0.623	1.09737e-148
COMTD1	7.61242e-153	-0.512322	0.156	0.402	2.28936e-148
TPSAB1	1.66838e-152	1.77478	0.28	0.109	5.0175e-148
SNHG25	3.03965e-152	-0.667285	0.602	0.735	9.14144e-148
ATP5F1E	4.55948e-152	0.515079	0.853	0.622	1.37122e-147
GDF15	1.10761e-150	-1.12219	0.137	0.375	3.33103e-146
ATXN7L3B	1.90249e-150	-0.542802	0.185	0.431	5.72155e-146
ATP5G1	3.54043e-150	-0.785908	0.098	0.322	1.06475e-145
MRPL14	4.75694e-150	-0.513786	0.49	0.665	1.4306e-145
CYR61	5.67581e-150	0.815658	0.398	0.204	1.70694e-145
LSM4	1.89662e-149	-0.584887	0.495	0.663	5.70389e-145
HN1	1.10379e-148	-0.749536	0.077	0.297	3.31955e-144
C17orf89	1.32351e-148	-0.716201	0.086	0.309	3.98032e-144
PERP	5.38423e-148	-0.843914	0.311	0.55	1.61925e-143
INSIG1	1.18543e-147	0.984242	0.534	0.36	3.56507e-143
ACTN1	3.52171e-147	0.50007	0.473	0.279	1.05912e-142
CCT3	4.28431e-147	-0.674268	0.63	0.739	1.28846e-142
SF3B6	4.56516e-147	-0.513967	0.71	0.781	1.37293e-142
USMG5	1.09211e-146	-1.04564	0.132	0.356	3.2844e-142
UPP1	2.72675e-146	0.544119	0.408	0.22	8.20044e-142
MMP9	1.01702e-145	0.787791	0.204	0.069	3.05858e-141
CBX3	2.08069e-145	-0.598585	0.617	0.724	6.25747e-141
HMGB3	3.69806e-145	-0.502178	0.126	0.358	1.11216e-140
EEF2	2.30103e-144	-0.904025	0.971	0.96	6.92011e-140
C7orf73	4.07568e-144	-0.635508	0.083	0.303	1.22572e-139
MDK	1.23115e-143	-0.822173	0.589	0.722	3.70256e-139
PDCD5	2.51919e-143	-0.580975	0.544	0.683	7.57622e-139
CFD	2.55468e-143	1.46846	0.401	0.224	7.68295e-139
PLD3	3.05986e-143	0.721997	0.604	0.445	9.20223e-139
GAMT	6.50923e-143	-0.6014	0.243	0.473	1.95759e-138
EREG	1.30497e-142	0.941256	0.115	0.023	3.92456e-138
CTHRC1	4.487e-142	0.965509	0.316	0.143	1.34942e-137
APOA1BP	4.06878e-141	-0.641323	0.068	0.279	1.22364e-136
CEBPD	4.6359e-141	0.681427	0.672	0.505	1.3942e-136
TRGC1	8.67995e-141	-0.860454	0.026	0.222	2.61041e-136
LSM5	8.06946e-140	-0.576086	0.511	0.669	2.42681e-135
ATP5I	3.17882e-139	-1.12295	0.138	0.36	9.55998e-135
CSRP1	1.14406e-138	0.65033	0.514	0.321	3.44064e-134
SHFM1	3.39217e-138	-0.940479	0.127	0.35	1.02016e-133
NGFRAP1	4.10731e-138	-1.09518	0.117	0.339	1.23523e-133
EGR4	1.77705e-137	-0.63977	0.04	0.244	5.34431e-133
C19orf81	1.3228e-136	-0.574654	0.046	0.248	3.97819e-132
SAT1	3.65126e-136	1.0121	0.944	0.886	1.09808e-131
NFKBIZ	5.84742e-135	0.575618	0.532	0.348	1.75855e-130
CPA3	7.88507e-135	1.26875	0.185	0.058	2.37136e-130
RGS2	9.98237e-135	0.800741	0.549	0.348	3.0021e-130
H3F3A	1.82205e-134	-0.501959	0.996	0.984	5.47963e-130
PHF6	4.46904e-134	-0.598091	0.114	0.331	1.34402e-129
ACPP	6.38748e-134	-0.911115	0.023	0.211	1.92097e-129
PEG10	7.56037e-134	-0.69289	0.047	0.249	2.27371e-129
TMEM141	1.07575e-133	-0.563392	0.435	0.617	3.2352e-129
MTRNR2L12	3.53551e-133	0.556555	0.784	0.622	1.06327e-128
NOTCH3	5.1597e-133	0.51294	0.302	0.135	1.55173e-128
AQP1	6.22616e-133	0.918574	0.199	0.068	1.87245e-128
ATP5J2	6.7085e-133	-0.816982	0.118	0.332	2.01751e-128
STRA13	1.00412e-132	-0.549365	0.077	0.283	3.01978e-128
C11orf31	1.86504e-132	-0.729171	0.125	0.342	5.60893e-128
TCEB2	2.32331e-132	-0.90211	0.139	0.361	6.98712e-128
NME1	2.6636e-132	-0.553482	0.471	0.635	8.01052e-128
ATP5G2	1.059e-131	-0.969032	0.14	0.362	3.18483e-127
ATP5E	1.29534e-131	-1.16478	0.142	0.364	3.89561e-127
FLT1	2.28731e-130	0.622633	0.154	0.043	6.87887e-126
RPL22L1	2.69312e-130	-0.706031	0.553	0.686	8.0993e-126
DDT	2.93685e-130	-0.5925	0.716	0.775	8.83229e-126
PNRC1	3.91343e-130	0.58966	0.802	0.687	1.17693e-125
MFSD1	4.43005e-130	0.501704	0.34	0.175	1.33229e-125
LAGE3	4.50846e-130	-0.594243	0.457	0.623	1.35587e-125
ATP5D	5.2892e-130	-0.729234	0.133	0.351	1.59067e-125
SET	1.20937e-129	-0.606021	0.683	0.764	3.63707e-125
CALD1	1.47996e-128	1.29078	0.605	0.511	4.45082e-124
SEC11C	1.54679e-128	-0.790726	0.399	0.585	4.65182e-124
ATP5G3	4.26543e-128	-0.683573	0.114	0.327	1.28279e-123
RORB	9.04167e-128	-1.61772	0.073	0.261	2.71919e-123
GNB2L1	1.75839e-126	-1.23076	0.142	0.364	5.28818e-122
DIO2	3.22623e-126	0.511422	0.189	0.064	9.70255e-122
AGT	4.73969e-126	0.575871	0.192	0.064	1.42541e-121
ZNF593	8.48289e-126	-0.513533	0.344	0.551	2.55114e-121
CDKN2A	3.85278e-125	-0.699661	0.133	0.344	1.15869e-120
MRPL41	2.86021e-124	-0.529752	0.686	0.767	8.60179e-120
UQCRFS1	3.89559e-123	-0.532805	0.503	0.658	1.17156e-118
PDLIM1	4.38605e-123	0.646274	0.502	0.334	1.31906e-118
PABPC1	5.3253e-123	-1.01198	0.918	0.908	1.60153e-118
POLR2I	6.07557e-123	-0.541392	0.622	0.723	1.82717e-118
ADAMTS1	6.50677e-123	0.556906	0.298	0.138	1.95685e-118
C14orf2	4.08466e-122	-0.662186	0.136	0.355	1.22842e-117
ENSA	4.65213e-122	-0.585961	0.586	0.707	1.39908e-117
KLF4	7.73704e-122	0.680318	0.547	0.385	2.32684e-117
TMEM134	8.37333e-122	-0.516317	0.399	0.589	2.51819e-117
ATP5J	1.22559e-121	-0.665048	0.132	0.347	3.68585e-117
PPA1	3.52016e-121	-0.627106	0.584	0.713	1.05865e-116
PFN2	5.70641e-121	-0.525964	0.238	0.46	1.71615e-116
MS4A2	4.97592e-119	0.614335	0.14	0.039	1.49646e-114
ADIRF	1.44405e-118	0.986233	0.533	0.343	4.34284e-114
UBE2S	3.17866e-117	-0.967164	0.548	0.68	9.5595e-113
GLUL	5.20587e-117	0.882481	0.703	0.6	1.56561e-112
EGR1	1.43004e-115	0.684162	0.747	0.599	4.3007e-111
NACA	5.79466e-114	-0.511821	0.995	0.993	1.74269e-109
NENF	7.88064e-114	-0.615886	0.666	0.742	2.37002e-109
EZR	3.0048e-113	-0.557804	0.41	0.623	9.03663e-109
ATP5B	2.15364e-112	-0.576886	0.102	0.296	6.47684e-108
ATP5L	8.65117e-112	-0.697837	0.141	0.361	2.60175e-107
AC090498.1	1.28964e-111	-0.912773	0.124	0.335	3.87847e-107
PPIC	1.48882e-111	0.508637	0.403	0.242	4.47747e-107
CST1	1.5176e-111	1.09377	0.257	0.109	4.56404e-107
GPM6A	3.94973e-111	-0.71676	0.055	0.228	1.18784e-106
PDLIM5	2.37118e-109	-1.2217	0.437	0.567	7.13108e-105
ALDOA	8.46853e-109	-0.739692	0.265	0.464	2.54682e-104
ATP5O	3.64159e-108	-0.520758	0.125	0.329	1.09517e-103
SSR4	1.21467e-107	-0.84915	0.922	0.92	3.65299e-103
FAM89B	1.35201e-107	-0.536158	0.371	0.557	4.06604e-103
COMP	3.67632e-107	0.629807	0.125	0.035	1.10562e-102
GLTSCR2	2.08053e-105	-0.539456	0.137	0.356	6.25699e-101
IDH2	5.92914e-105	-0.518301	0.352	0.545	1.78313e-100
CLDN5	1.38515e-104	0.755609	0.145	0.046	4.1657e-100
H1FX	2.47495e-104	-0.537483	0.457	0.632	7.44316e-100
MCAM	5.66188e-104	0.517153	0.218	0.089	1.70275e-99
CAMK2N1	4.75159e-103	-0.990184	0.268	0.478	1.42899e-98
C19orf43	5.33287e-103	-0.540644	0.13	0.334	1.60381e-98
NDUFB11	7.58633e-103	-0.513883	0.804	0.825	2.28151e-98
STEAP1	1.10932e-102	-0.50912	0.097	0.275	3.33618e-98
ADI1	1.98398e-102	-0.556272	0.476	0.631	5.96662e-98
COX20	5.91144e-102	-0.586775	0.521	0.653	1.77781e-97
ACTG1	1.51635e-101	-0.756143	0.978	0.971	4.56027e-97
ATP1B3	3.34796e-101	0.575217	0.632	0.503	1.00687e-96
PLVAP	9.95352e-101	0.760142	0.162	0.057	2.99342e-96
PTGDS	1.52359e-100	0.836896	0.167	0.059	4.58204e-96
IGKC	9.61003e-100	-2.24382	0.714	0.542	2.89012e-95
CREG1	9.61659e-100	0.608608	0.462	0.324	2.89209e-95
MAP2K2	2.31901e-99	-0.573373	0.402	0.57	6.97419e-95
CCL20	2.79254e-99	1.09739	0.155	0.054	8.39828e-95
FBLN1	3.69228e-99	1.08381	0.358	0.211	1.11042e-94
HCFC1R1	7.93665e-98	0.527926	0.579	0.449	2.38687e-93
SLC45A3	7.56014e-94	-0.518264	0.066	0.228	2.27364e-89
AGR2	1.50589e-93	-1.17889	0.066	0.227	4.52883e-89
TNF	4.12907e-93	0.60425	0.128	0.04	1.24178e-88
PA2G4	5.83148e-93	-0.508354	0.52	0.646	1.75376e-88
C8orf4	3.68715e-91	-0.648826	0.048	0.198	1.10887e-86
PAPSS1	4.70875e-91	-0.564396	0.189	0.358	1.41611e-86
RANBP1	1.42909e-90	-0.507976	0.564	0.671	4.29783e-86
CSTB	2.54532e-89	0.546189	0.86	0.792	7.65481e-85
PRMT1	1.37617e-88	-0.62992	0.453	0.597	4.1387e-84
TFF3	4.50637e-88	-1.54234	0.324	0.475	1.35524e-83
KLK1	6.39403e-88	-1.99344	0.035	0.174	1.92294e-83
RPS11	1.62596e-86	-0.537242	0.997	0.995	4.88991e-82
ISG15	2.12076e-84	0.56331	0.741	0.613	6.37798e-80
SPINT2	3.70074e-81	-0.61751	0.441	0.596	1.11296e-76
PCAT19	5.48676e-81	0.636211	0.169	0.07	1.65009e-76
SLC40A1	3.74448e-79	0.558049	0.263	0.134	1.12611e-74
MXD1	8.52642e-79	0.560004	0.295	0.171	2.56424e-74
HIST1H2AC	1.30114e-78	-0.503444	0.161	0.321	3.91305e-74
RGS5	2.22396e-78	0.839463	0.26	0.138	6.68835e-74
RGS10	3.64473e-77	0.579903	0.534	0.413	1.09612e-72
MYH11	6.78244e-77	0.721395	0.162	0.065	2.03975e-72
VWF	1.05223e-76	0.893569	0.188	0.085	3.16448e-72
BAMBI	9.42721e-76	-0.550344	0.165	0.316	2.83514e-71
ACTG2	3.53495e-73	0.625923	0.109	0.035	1.0631e-68
GPX3	4.34603e-72	0.543284	0.292	0.167	1.30702e-67
AL589182.1	1.15172e-70	-0.658575	0.019	0.13	3.46368e-66
SPTBN1	1.26793e-70	0.544993	0.469	0.361	3.81317e-66
SRSF7	2.99371e-69	-0.525901	0.683	0.777	9.00328e-65
SELE	2.13533e-68	0.990437	0.138	0.055	6.42178e-64
YIPF6	3.09022e-65	-0.646224	0.223	0.381	9.29354e-61
CCNG2	4.10049e-61	-0.579792	0.135	0.262	1.23318e-56
BAALC	4.03626e-59	-0.9417	0.04	0.144	1.21387e-54
SMS	1.74071e-58	-0.588507	0.471	0.597	5.23502e-54
GADD45G	9.65931e-57	-0.533256	0.215	0.357	2.90494e-52
CRABP2	7.37703e-54	-0.508515	0.195	0.327	2.21857e-49
PPP3CA	3.71905e-52	-0.774263	0.318	0.431	1.11847e-47
STC1	3.97003e-51	1.05014	0.118	0.05	1.19395e-46
TUBA4A	2.11261e-49	-0.580275	0.139	0.263	6.35346e-45
CLU	5.82507e-49	0.770664	0.51	0.423	1.75183e-44
LTC4S	1.57133e-48	0.812945	0.347	0.256	4.72561e-44
CTSH	1.72866e-47	0.565774	0.442	0.37	5.19878e-43
RPL31	1.2384e-45	-0.586981	0.981	0.977	3.72437e-41
IGHM	1.50366e-45	-0.645172	0.227	0.128	4.52211e-41
IGFBP3	1.83226e-45	0.766218	0.246	0.15	5.51034e-41
ANGPT2	4.47655e-45	0.515955	0.176	0.094	1.34628e-40
DLX5	2.55585e-42	-0.598247	0.041	0.124	7.68646e-38
CRIP2	1.73048e-41	0.648505	0.489	0.428	5.20424e-37
RPS17	2.3959e-41	-0.77243	0.838	0.835	7.20544e-37
TUBB4B	8.68863e-41	-0.593874	0.727	0.751	2.61302e-36
FOS	3.52687e-40	0.544021	0.837	0.763	1.06067e-35
RNASET2	1.69421e-38	0.614833	0.541	0.498	5.09516e-34
MAFB	7.7755e-38	0.53269	0.443	0.357	2.3384e-33
DSEL	6.14379e-36	-0.600984	0.129	0.217	1.84768e-31
ACKR1	5.2451e-35	0.602317	0.101	0.047	1.57741e-30
VAMP8	6.11461e-35	0.51285	0.518	0.475	1.83891e-30
NDUFA4L2	3.08611e-34	0.771647	0.182	0.109	9.28115e-30
SPP1	1.03788e-33	1.77207	0.145	0.081	3.12131e-29
TACSTD2	1.71616e-32	-0.53676	0.229	0.317	5.16119e-28
CENPX	2.35829e-32	-0.577418	0.301	0.355	7.09233e-28
TRBC2	1.51637e-29	-0.803412	0.095	0.171	4.56033e-25
CD3D	1.25519e-26	-0.742407	0.076	0.143	3.77487e-22
ASPSCR1	1.22574e-24	-1.62756	0.563	0.469	3.68629e-20
KRT19	1.52269e-24	-0.596892	0.261	0.343	4.57934e-20
CD3E	5.87216e-24	-0.56701	0.068	0.128	1.76599e-19
AREG	6.92863e-24	0.81481	0.313	0.245	2.08372e-19
PPIF	1.39371e-23	0.525178	0.317	0.27	4.19145e-19
HIST1H1C	2.14298e-22	-0.692119	0.182	0.259	6.44479e-18
CD2	4.45461e-22	-0.6499	0.064	0.121	1.33968e-17
CXCR4	9.08087e-22	-0.612468	0.429	0.327	2.73098e-17
RBP1	8.5004e-20	-0.967613	0.494	0.344	2.55641e-15
IGHG3	8.90275e-18	-1.50432	0.308	0.235	2.67741e-13
TUBB2B	1.03783e-16	-0.588008	0.122	0.172	3.12116e-12
FABP5	3.75118e-16	-0.637341	0.368	0.448	1.12813e-11
SPON2	2.16365e-15	-1.15352	0.384	0.403	6.50697e-11
IGHG1	8.43065e-15	-1.69477	0.252	0.193	2.53543e-10
RAMP2	2.98822e-11	0.728798	0.25	0.22	8.98678e-07
LTB	8.07085e-11	-0.610797	0.076	0.113	2.42723e-06
JPT1	1.3776e-10	-0.631437	0.512	0.445	4.14298e-06
IGHG4	2.05691e-10	-1.15189	0.36	0.3	6.18594e-06
IGLC2	2.12646e-08	-1.95177	0.384	0.325	0.00063951
CD7	3.36102e-07	-0.767753	0.119	0.147	0.0101079

## Sheet: Active_Metabolism_degs
gene	p_val	avg_log2FC	pct.1	pct.2	p_val_adj
CFH	0	1.01035	0.355	0.049	0
CD99	0	1.16054	0.903	0.686	0
TFPI	0	0.509319	0.297	0.064	0
HSPB6	0	0.714902	0.287	0.058	0
MRC2	0	0.758534	0.36	0.038	0
DCN	0	3.5304	0.67	0.102	0
WWTR1	0	0.813915	0.465	0.155	0
FHL1	0	0.665693	0.381	0.117	0
EHD2	0	0.572355	0.34	0.067	0
VIM	0	2.03304	0.993	0.544	0
TIMP2	0	1.44196	0.718	0.289	0
VCAN	0	1.69647	0.524	0.041	0
LTBP1	0	0.769128	0.404	0.119	0
ELN	0	0.996734	0.385	0.042	0
DKK3	0	1.129	0.502	0.057	0
MYLK	0	0.916702	0.377	0.08	0
LAPTM4A	0	0.806451	0.847	0.648	0
PABPC1	0	-1.32346	0.813	0.924	0
CYBRD1	0	0.84809	0.44	0.114	0
NOTCH3	0	0.884481	0.414	0.118	0
TPD52	0	-0.762945	0.064	0.505	0
FBLN1	0	2.48396	0.552	0.182	0
FAP	0	0.611542	0.296	0.013	0
TNS1	0	0.603148	0.369	0.092	0
COL16A1	0	0.609629	0.294	0.066	0
CD59	0	0.998737	0.781	0.456	0
MMP2	0	1.32392	0.426	0.06	0
RPLP0	0	-0.729603	0.988	0.99	0
LTBP4	0	1.5219	0.565	0.127	0
CCDC80	0	1.89988	0.523	0.068	0
GGT5	0	1.29116	0.469	0.04	0
LGALS1	0	2.66326	0.986	0.584	0
TIMP3	0	1.58746	0.602	0.164	0
CYB5R3	0	1.05129	0.757	0.457	0
PROCR	0	0.577119	0.312	0.059	0
MYL9	0	2.31614	0.746	0.218	0
CST3	0	1.42436	0.981	0.805	0
MXRA5	0	0.595673	0.292	0.019	0
PLS3	0	0.547716	0.336	0.093	0
TIMP1	0	3.94244	0.976	0.529	0
TSC22D1	0	1.12245	0.779	0.56	0
HCFC1R1	0	1.14294	0.685	0.433	0
CRISPLD2	0	0.789342	0.365	0.071	0
CPQ	0	0.61971	0.398	0.134	0
TGFB1	0	0.74154	0.522	0.176	0
RPS19	0	-0.758879	0.999	1	0
COMP	0	1.65592	0.221	0.02	0
PTN	0	1.77977	0.408	0.045	0
CAV1	0	1.10089	0.481	0.129	0
PCOLCE	0	1.78369	0.6	0.112	0
SERPINE1	0	0.799344	0.314	0.072	0
SFRP4	0	2.57725	0.417	0.037	0
TSPAN13	0	-0.853287	0.114	0.511	0
RARRES2	0	2.49491	0.668	0.153	0
AEBP1	0	2.08774	0.656	0.074	0
OGN	0	0.642713	0.162	0.01	0
ASPN	0	1.12975	0.346	0.019	0
ENG	0	1.09333	0.461	0.103	0
CXCL12	0	0.768753	0.27	0.037	0
ACTA2	0	2.29455	0.553	0.13	0
LGALS3BP	0	1.04708	0.609	0.28	0
COL1A1	0	4.00737	0.707	0.14	0
PMP22	0	1.09109	0.609	0.131	0
RAB34	0	0.878341	0.6	0.23	0
SOD3	0	1.7749	0.596	0.107	0
CRYAB	0	1.36022	0.552	0.163	0
CTSC	0	0.842787	0.476	0.167	0
KRT18	0	-1.77746	0.274	0.7	0
MGP	0	4.15835	0.927	0.545	0
COL12A1	0	0.712111	0.288	0.029	0
LAMA4	0	0.896513	0.446	0.064	0
SPARC	0	2.64211	0.797	0.181	0
THBS4	0	1.17008	0.188	0.025	0
PDGFRB	0	1.06663	0.483	0.048	0
RPS15	0	-0.703301	0.999	1	0
EFEMP1	0	1.02046	0.315	0.03	0
FN1	0	2.18669	0.7	0.215	0
IGFBP5	0	3.28827	0.666	0.133	0
FHL2	0	0.916764	0.438	0.157	0
PRRX1	0	1.24492	0.515	0.037	0
OLFML3	0	0.82738	0.361	0.038	0
CNN3	0	0.884168	0.645	0.323	0
CTGF	0	2.25874	0.593	0.113	0
TCF21	0	0.555505	0.238	0.01	0
C2orf40	0	0.964835	0.251	0.035	0
IFI27L2	0	0.754352	0.696	0.387	0
LTBP2	0	0.907147	0.359	0.03	0
EPCAM	0	-1.36527	0.091	0.591	0
PLXDC2	0	0.585691	0.339	0.074	0
TGFBI	0	0.970984	0.417	0.091	0
FMOD	0	0.686892	0.331	0.037	0
INHBA	0	1.54787	0.462	0.064	0
CALD1	0	2.30093	0.837	0.477	0
SSPN	0	0.921595	0.426	0.075	0
LRP1	0	1.13953	0.515	0.107	0
COL10A1	0	0.692959	0.208	0.004	0
RPS10	0	-0.849378	0.969	0.982	0
AHNAK	0	0.828556	0.664	0.34	0
MT2A	0	1.32601	0.936	0.764	0
RRAS	0	0.966936	0.482	0.156	0
GNG11	0	1.09516	0.584	0.122	0
ISLR	0	1.55773	0.482	0.026	0
PALLD	0	1.03715	0.503	0.146	0
FOXA1	0	-0.827222	0.038	0.428	0
CNN1	0	0.807692	0.221	0.034	0
RPL36	0	-0.694797	0.998	0.999	0
COL5A1	0	1.09002	0.402	0.033	0
AKAP12	0	0.813651	0.439	0.114	0
SH3BGRL	0	0.837614	0.716	0.295	0
TMEM204	0	0.552152	0.309	0.044	0
LGALS3	0	0.780049	0.767	0.363	0
SERPINF1	0	2.04563	0.575	0.112	0
RAB25	0	-0.891077	0.077	0.543	0
POSTN	0	1.78905	0.347	0.035	0
TPT1	0	0.635789	0.999	0.998	0
EMP1	0	1.02021	0.548	0.155	0
COL4A2	0	1.67384	0.62	0.111	0
ANXA1	0	0.624777	0.796	0.385	0
CD63	0	1.32075	0.993	0.887	0
AGT	0	1.15559	0.28	0.051	0
SERPINE2	0	1.02477	0.353	0.054	0
ITM2B	0	1.21632	0.965	0.792	0
GYPC	0	0.526382	0.524	0.191	0
LRRC32	0	0.523251	0.282	0.045	0
SULF1	0	1.50382	0.471	0.05	0
THBS1	0	0.83584	0.431	0.142	0
UACA	0	0.727968	0.376	0.107	0
EMILIN1	0	0.885902	0.367	0.025	0
LUM	0	3.29877	0.631	0.075	0
FBLN5	0	0.731718	0.307	0.022	0
MFGE8	0	1.53598	0.656	0.18	0
TGFB1I1	0	0.961245	0.456	0.074	0
CDH11	0	0.859366	0.378	0.027	0
RPS2	0	-1.05143	0.996	0.998	0
ABCA8	0	0.514559	0.193	0.01	0
IGFBP4	0	2.20166	0.799	0.192	0
IFITM3	0	1.99856	0.964	0.535	0
COL6A1	0	1.65438	0.622	0.133	0
COL6A2	0	2.29558	0.755	0.148	0
EMP3	0	0.974958	0.713	0.306	0
KLK3	0	-2.72226	0.087	0.448	0
RCN3	0	0.74256	0.348	0.039	0
HSPG2	0	1.29867	0.455	0.129	0
CYR61	0	1.00659	0.49	0.19	0
ECM1	0	0.508193	0.273	0.037	0
CTSK	0	1.26097	0.491	0.045	0
COL8A1	0	1.4312	0.453	0.028	0
OCIAD2	0	-0.795838	0.235	0.633	0
SFRP2	0	2.54628	0.36	0.031	0
CXCL14	0	3.31995	0.342	0.051	0
STOM	0	0.717855	0.497	0.194	0
GSN	0	2.73195	0.846	0.349	0
ZEB1	0	0.556033	0.331	0.06	0
ADIRF	0	1.54379	0.652	0.325	0
SERPING1	0	1.81879	0.752	0.191	0
SERPINH1	0	1.18009	0.688	0.348	0
TAGLN	0	2.81521	0.725	0.204	0
TM7SF2	0	-0.849018	0.049	0.468	0
ITGB1	0	1.0922	0.768	0.567	0
SPARCL1	0	1.79037	0.67	0.145	0
DAB2	0	0.536995	0.385	0.091	0
THY1	0	1.78734	0.561	0.055	0
PDLIM3	0	1.00735	0.422	0.059	0
RPL30	0	-0.526891	0.997	0.999	0
MMP14	0	0.668323	0.353	0.091	0
TAGLN2	0	0.809672	0.893	0.605	0
CSRP1	0	1.23427	0.6	0.308	0
PRAC1	0	-1.63009	0.065	0.49	0
HOXB13	0	-0.639231	0.036	0.409	0
C1R	0	2.05202	0.67	0.113	0
LMNA	0	1.209	0.926	0.639	0
COX7A1	0	1.43352	0.688	0.099	0
PLXDC1	0	0.57729	0.254	0.041	0
CYGB	0	1.18727	0.441	0.038	0
MXRA8	0	1.36478	0.542	0.068	0
NEXN	0	0.572403	0.256	0.027	0
DDR2	0	0.556082	0.307	0.031	0
OLFML2B	0	0.576573	0.235	0.029	0
FRZB	0	0.863554	0.342	0.044	0
S100A11	0	0.634779	0.974	0.693	0
COL6A3	0	1.70581	0.512	0.045	0
FSTL1	0	1.75134	0.652	0.129	0
ELF3	0	-1.74932	0.117	0.619	0
IGFBP7	0	3.58874	0.93	0.407	0
FBLN2	0	0.759058	0.289	0.045	0
IFI16	0	0.577329	0.487	0.16	0
ANXA5	0	0.991198	0.762	0.496	0
ESM1	0	0.726423	0.178	0.021	0
GPX8	0	0.635235	0.333	0.036	0
COL1A2	0	3.59384	0.727	0.12	0
CTHRC1	0	1.90327	0.497	0.116	0
GEM	0	1.68428	0.521	0.142	0
CLDN3	0	-1.39428	0.098	0.57	0
HTRA1	0	1.10371	0.495	0.093	0
FBN1	0	1.05492	0.411	0.04	0
MFAP4	0	1.6386	0.473	0.052	0
NNMT	0	1.99709	0.719	0.134	0
CERCAM	0	0.594451	0.323	0.069	0
TPM4	0	1.22998	0.835	0.449	0
AXL	0	0.567023	0.325	0.068	0
PPP1R14A	0	1.39449	0.384	0.065	0
SPINT2	0	-1.07627	0.257	0.623	0
C19orf48	0	-1.27217	0.225	0.59	0
IGFBP6	0	2.92892	0.612	0.116	0
FILIP1L	0	1.10032	0.489	0.095	0
RAB31	0	0.676792	0.419	0.113	0
COL3A1	0	3.23954	0.68	0.096	0
PKIG	0	0.858582	0.589	0.283	0
VAMP5	0	0.957636	0.695	0.243	0
PPIC	0	1.01858	0.548	0.22	0
CLIC4	0	0.647117	0.482	0.199	0
HINT1	0	-0.678321	0.879	0.945	0
ANTXR1	0	0.677268	0.351	0.102	0
DCXR	0	-0.880372	0.35	0.687	0
CST2	0	0.701351	0.184	0.006	0
KRT8	0	-1.55261	0.28	0.696	0
HTRA3	0	0.965481	0.304	0.018	0
RPS21	0	-0.6685	0.992	0.996	0
RPS7	0	-0.612003	0.992	0.996	0
SYNPO	0	0.551968	0.297	0.059	0
LAMB2	0	0.749471	0.433	0.123	0
SYNPO2	0	0.688431	0.284	0.048	0
EFEMP2	0	1.05746	0.52	0.095	0
MIR4435-2HG	0	0.841058	0.5	0.205	0
PODN	0	0.519983	0.25	0.011	0
CD248	0	0.529508	0.217	0.019	0
MARCKSL1	0	-1.4303	0.506	0.767	0
NR2F1	0	1.16531	0.416	0.064	0
A2M	0	1.74807	0.662	0.18	0
TUBB6	0	0.574327	0.398	0.114	0
SPHK1	0	0.5029	0.337	0.096	0
FIBIN	0	0.545446	0.208	0.013	0
MSC	0	0.502206	0.237	0.021	0
FOXS1	0	0.533787	0.212	0.018	0
F2R	0	1.00528	0.381	0.065	0
CLDN7	0	-1.18117	0.091	0.578	0
C1S	0	2.03566	0.634	0.081	0
BGN	0	3.14593	0.81	0.137	0
ANXA2	0	0.942972	0.801	0.476	0
COL18A1	0	1.24753	0.609	0.222	0
GAS6	0	0.877498	0.493	0.19	0
TMEM119	0	0.50867	0.192	0.008	0
FHL3	0	0.515694	0.325	0.08	0
OAF	0	0.648377	0.358	0.095	0
IFITM2	0	1.24853	0.934	0.465	0
THBS2	0	1.20684	0.391	0.022	0
C11orf96	0	2.23234	0.694	0.247	0
COL4A1	0	1.43701	0.543	0.097	0
COL14A1	0	1.10513	0.317	0.031	0
PRELP	0	1.35564	0.433	0.025	0
APOD	0	4.71616	0.573	0.258	0
PLAC9	0	1.96451	0.633	0.102	0
CLDN4	0	-1.79382	0.177	0.646	0
MMP23B	0	0.64248	0.216	0.031	0
TCF4	0	0.930956	0.589	0.238	0
PDLIM7	0	1.15661	0.579	0.178	0
FLNA	0	1.28806	0.678	0.363	0
KANK2	0	0.639999	0.38	0.118	0
MFAP5	0	1.22686	0.197	0.016	0
S100A6	0	1.07447	0.985	0.725	0
TPM2	0	2.37121	0.713	0.18	0
ITGBL1	0	0.893141	0.234	0.006	0
RPL39	0	-0.798716	0.998	0.999	0
COL5A2	0	1.0093	0.413	0.044	0
COL15A1	0	0.807532	0.31	0.043	0
HSPA1A	0	1.05008	0.957	0.76	0
DIO2	0	1.05351	0.314	0.046	0
ITGA1	0	0.583026	0.314	0.06	0
TSPAN4	0	0.809532	0.489	0.196	0
MEG3	0	1.23313	0.456	0.063	0
TSTD1	0	-1.42747	0.27	0.749	0
RPL41	0	-0.597512	1	1	0
RPS18	0	-0.856893	0.999	1	0
MTRNR2L8	0	1.20026	0.748	0.488	0
SMIM3	0	0.604879	0.39	0.119	0
INAFM1	0	0.842368	0.488	0.196	0
FXYD1	0	1.18822	0.43	0.091	0
CD24	0	-1.35186	0.162	0.565	0
REX1BD	0	0.718289	0.577	0.208	0
CAVIN3	0	1.52008	0.589	0.072	0
CAVIN1	0	1.30904	0.638	0.129	0
LHFPL6	0	0.979415	0.407	0.081	0
SELENOM	0	1.87541	0.723	0.275	0
CYTOR	0	1.23968	0.588	0.178	0
PDLIM2	1.83627e-307	0.881841	0.638	0.374	5.5224e-303
PDLIM4	1.13401e-305	0.698722	0.455	0.181	3.41043e-301
EPB41L2	6.8178e-305	0.514155	0.368	0.116	2.05038e-300
ODC1	6.0945e-304	-1.26527	0.378	0.678	1.83286e-299
KRTCAP3	1.54473e-302	-0.56282	0.047	0.408	4.64563e-298
BST2	2.74454e-301	0.932069	0.638	0.321	8.25392e-297
PLPP2	5.57564e-300	-0.695193	0.1	0.466	1.67682e-295
FXYD3	2.82528e-296	-1.15329	0.141	0.501	8.49675e-292
TCEAL9	4.68463e-294	0.84425	0.557	0.278	1.40885e-289
C12orf57	2.94934e-292	0.72422	0.918	0.839	8.86984e-288
C7	5.47695e-291	0.824071	0.154	0.02	1.64714e-286
CYP1B1	1.86373e-290	0.557305	0.37	0.116	5.605e-286
H3F3A	7.89054e-290	-0.750508	0.981	0.986	2.373e-285
FOSB	1.97559e-286	0.988217	0.89	0.803	5.9414e-282
PCSK1N	2.09244e-286	-1.03216	0.189	0.554	6.2928e-282
RPS4X	5.9168e-284	-0.640378	0.997	0.998	1.77942e-279
EZR	3.03849e-279	-0.868798	0.283	0.642	9.13795e-275
MAL2	1.31429e-278	-0.627676	0.053	0.398	3.95258e-274
FXYD6	3.93839e-278	0.585847	0.389	0.135	1.18443e-273
MT1E	6.19461e-277	0.832451	0.612	0.295	1.86297e-272
YBX3	7.15596e-277	0.805939	0.666	0.409	2.15208e-272
RPS3	2.86101e-275	-0.584769	0.996	0.998	8.6042e-271
BEX2	1.40396e-272	-0.582786	0.082	0.435	4.22227e-268
CCL2	6.03193e-272	1.61857	0.562	0.286	1.81404e-267
MXRA7	1.16794e-271	0.756382	0.499	0.248	3.51246e-267
DNAJC15	2.81563e-271	0.501289	0.48	0.196	8.46772e-267
HSPB1	3.61169e-270	0.859492	0.986	0.945	1.08618e-265
PHLDB1	1.73681e-269	0.51535	0.319	0.101	5.22328e-265
RABAC1	1.84088e-269	0.696073	0.859	0.726	5.53626e-265
CALU	4.71559e-266	0.747653	0.582	0.356	1.41817e-261
HMGN1	1.81158e-264	-0.76879	0.721	0.858	5.44816e-260
CRTAP	3.12987e-264	0.649857	0.556	0.31	9.41277e-260
HPN	3.49004e-264	-0.537843	0.024	0.343	1.0496e-259
SYNGR2	3.05392e-263	-0.64115	0.203	0.565	9.18436e-259
CXADR	4.99405e-262	-0.520434	0.04	0.368	1.50191e-257
SNHG19	1.48392e-261	-0.962215	0.284	0.599	4.46275e-257
RPS5	2.11456e-261	-0.91801	0.998	0.997	6.35932e-257
STMN1	2.2574e-260	-1.25617	0.309	0.632	6.78889e-256
SDC2	1.71276e-258	0.738744	0.482	0.224	5.15097e-254
IL32	3.01402e-258	0.513347	0.608	0.306	9.06438e-254
EEF1A2	5.78648e-258	-0.875173	0.041	0.36	1.74023e-253
IER3	1.22217e-257	1.29017	0.707	0.433	3.67556e-253
SEZ6L2	1.46297e-257	-0.74044	0.094	0.43	4.39974e-253
SPTBN1	2.32151e-257	0.852004	0.581	0.344	6.98171e-253
RPS27L	1.76649e-256	0.743801	0.88	0.793	5.31254e-252
SNHG7	1.02491e-255	-0.834472	0.44	0.699	3.08232e-251
KLK2	9.17407e-255	-1.88564	0.072	0.387	2.75901e-250
MSN	2.40257e-252	0.59527	0.557	0.264	7.22549e-248
MZT2A	5.25254e-252	-0.890612	0.57	0.758	1.57965e-247
S100A13	1.07941e-251	0.895042	0.703	0.479	3.24622e-247
TMEM176B	4.55922e-250	0.769897	0.442	0.188	1.37114e-245
HIST3H2A	8.09664e-250	-0.707088	0.168	0.503	2.43498e-245
SMIM22	6.62325e-249	-0.867923	0.066	0.377	1.99188e-244
EID1	1.36797e-247	0.68727	0.82	0.709	4.11404e-243
RHOA	1.57854e-247	0.596725	0.867	0.757	4.74729e-243
DNAJB4	3.18651e-246	0.641249	0.494	0.231	9.5831e-242
SNRPE	1.19603e-245	-0.785158	0.678	0.796	3.59695e-241
NDUFV3	1.75542e-245	-0.769398	0.271	0.587	5.27925e-241
MESP1	2.54557e-244	-0.627664	0.054	0.369	7.65554e-240
TNXB	1.11886e-241	0.567687	0.16	0.027	3.36485e-237
RPL28	2.9848e-241	-0.502147	1	1	8.97649e-237
CRNDE	6.26264e-241	-0.512054	0.114	0.45	1.88343e-236
RHOC	1.98183e-237	0.710778	0.743	0.544	5.96017e-233
SLC38A11	2.86961e-234	-0.965507	0.045	0.343	8.63006e-230
RBP4	1.01982e-233	0.668084	0.166	0.03	3.06699e-229
SELENOW	1.64446e-232	0.782431	0.777	0.502	4.94556e-228
RPL36A	1.67078e-232	-0.774961	0.865	0.928	5.02471e-228
ILK	8.01065e-232	0.660738	0.497	0.263	2.40912e-227
TAX1BP3	3.97536e-231	0.666962	0.541	0.311	1.19555e-226
SPDEF	5.3419e-231	-0.629516	0.027	0.317	1.60652e-226
ZG16B	3.33268e-230	-0.693109	0.038	0.333	1.00227e-225
RTL8C	4.72232e-230	0.578454	0.417	0.187	1.42019e-225
ACTN1	1.51261e-229	0.793488	0.501	0.275	4.54902e-225
COPZ2	2.55429e-229	0.532007	0.305	0.104	7.68178e-225
UQCR11	4.09642e-229	-0.557939	0.889	0.926	1.23196e-224
MTRNR2L12	2.43367e-228	0.89104	0.789	0.621	7.31901e-224
NOP53	6.71492e-226	0.626024	0.795	0.547	2.01944e-221
HEBP2	1.555e-223	-0.683823	0.409	0.673	4.6765e-219
PLTP	1.92719e-223	0.551759	0.329	0.12	5.79582e-219
PDLIM1	1.63832e-222	0.737451	0.571	0.324	4.92709e-218
SNHG25	2.05734e-222	-0.760126	0.513	0.748	6.18724e-218
TCIM	6.71241e-222	0.595964	0.269	0.082	2.01869e-217
UQCR10	1.47614e-221	-0.588584	0.77	0.865	4.43935e-217
MYH9	1.69891e-220	0.710992	0.601	0.376	5.10929e-216
DUS1L	2.34825e-220	-0.541683	0.175	0.494	7.06214e-216
PARP1	5.8363e-220	-0.556164	0.207	0.527	1.75521e-215
TSHZ2	4.36908e-219	0.669209	0.419	0.186	1.31396e-214
RGS3	3.26049e-217	0.562051	0.276	0.088	9.8056e-213
SPATS2L	2.20914e-209	0.641041	0.634	0.409	6.64378e-205
TPM1	1.3416e-207	1.37684	0.746	0.63	4.03474e-203
S100A4	2.27732e-206	0.955469	0.702	0.444	6.8488e-202
ANAPC11	6.36456e-206	-0.692205	0.747	0.818	1.91408e-201
PCBD1	1.11604e-205	-0.617877	0.502	0.722	3.35638e-201
FAM110B	6.294e-205	-1.10038	0.106	0.386	1.89286e-200
RPL12	1.10843e-203	-0.55771	0.998	0.999	3.3335e-199
MFAP2	2.42995e-203	0.513424	0.294	0.103	7.30783e-199
MYL12A	6.75511e-202	0.569127	0.853	0.762	2.03153e-197
FGFR1	4.12286e-201	0.586587	0.443	0.225	1.23991e-196
CCDC167	9.95217e-201	-0.639378	0.25	0.539	2.99302e-196
ID4	2.18763e-200	0.726026	0.348	0.144	6.57907e-196
PCOLCE2	3.58087e-200	0.783432	0.11	0.015	1.07691e-195
PAFAH1B3	3.93457e-200	-0.590078	0.206	0.505	1.18328e-195
MPC2	3.96939e-200	-0.714479	0.52	0.713	1.19375e-195
IDH2	1.73559e-199	-0.652583	0.262	0.558	5.21961e-195
PPP1R1B	2.97588e-199	-0.62356	0.042	0.308	8.94966e-195
CKB	3.24431e-199	-1.73846	0.313	0.54	9.75695e-195
COX6A1	2.91789e-198	-0.566174	0.877	0.898	8.77526e-194
MMP11	1.31144e-196	0.747592	0.191	0.049	3.94402e-192
RGS5	8.8839e-196	1.01511	0.324	0.128	2.67174e-191
FOLH1	1.27856e-195	-0.805038	0.023	0.277	3.84513e-191
CST1	1.81384e-195	2.17747	0.29	0.104	5.45493e-191
ACTG2	3.53449e-195	1.07667	0.15	0.029	1.06296e-190
RPSA	6.20084e-195	-0.510866	0.986	0.992	1.86484e-190
MYH11	1.99969e-193	1.05433	0.212	0.058	6.01387e-189
MYL6	5.17e-193	0.647912	0.991	0.978	1.55483e-188
AR	2.90059e-192	-2.17066	0.257	0.494	8.72325e-188
SEPT11	4.71621e-192	0.675082	0.465	0.249	1.41835e-187
SQSTM1	1.62122e-191	0.589573	0.859	0.762	4.87565e-187
TIMM13	7.51587e-191	-0.975667	0.616	0.753	2.26032e-186
TMEM238	2.05025e-190	-1.12083	0.057	0.313	6.16593e-186
HSPA1B	5.4272e-190	0.854317	0.848	0.785	1.63217e-185
ATP1B1	1.43077e-188	-0.704298	0.163	0.452	4.30289e-184
NFIA	1.65263e-188	0.57703	0.471	0.25	4.97011e-184
SEC11C	1.8501e-188	-0.871708	0.322	0.597	5.56398e-184
LSM7	1.33311e-187	-0.698467	0.699	0.802	4.00919e-183
NKX3-1	1.03695e-185	-0.891529	0.075	0.334	3.11852e-181
MORF4L1	1.27695e-185	0.522538	0.816	0.725	3.84031e-181
SELENOF	2.37137e-185	0.508335	0.482	0.253	7.13167e-181
MPP6	4.30661e-185	-0.55566	0.04	0.293	1.29517e-180
SRSF9	6.18017e-185	-0.618238	0.467	0.687	1.85863e-180
LSM4	6.5851e-184	-0.606163	0.433	0.672	1.9804e-179
RPS26	8.73953e-184	-0.50901	0.98	0.987	2.62833e-179
NFE2L2	5.31437e-183	0.562896	0.678	0.475	1.59824e-178
HMGA1	1.16135e-182	-0.548849	0.273	0.578	3.49265e-178
MYL12B	3.02669e-182	0.533493	0.892	0.847	9.10247e-178
LAGE3	7.69311e-182	-0.645498	0.385	0.634	2.31363e-177
TGM2	4.22724e-181	0.529304	0.347	0.142	1.2713e-176
DEPP1	6.05396e-181	0.664102	0.181	0.046	1.82067e-176
PHLDA1	8.97374e-181	0.739183	0.634	0.4	2.69876e-176
HN1	1.47456e-180	-0.797724	0.053	0.3	4.43458e-176
PPP1R14B	1.54902e-180	-0.857043	0.438	0.657	4.65851e-176
TSPAN8	2.00905e-180	-1.08486	0.087	0.34	6.04202e-176
MRPL12	1.07085e-178	-0.598062	0.331	0.588	3.22048e-174
TMPRSS2	8.1929e-177	-0.587919	0.016	0.248	2.46393e-172
BAG3	3.96656e-176	0.6398	0.588	0.358	1.1929e-171
PLPP3	4.99782e-175	0.536668	0.289	0.111	1.50304e-170
ZFAS1	1.57089e-174	-0.563971	0.84	0.902	4.72431e-170
NFKBIA	2.14347e-174	0.96393	0.868	0.767	6.44628e-170
TMEM134	2.49702e-174	-0.569314	0.332	0.599	7.50955e-170
C3	1.71581e-173	1.17842	0.243	0.084	5.16013e-169
ABL2	1.71675e-171	0.683761	0.444	0.249	5.16295e-167
MYO6	2.00867e-171	-0.832127	0.144	0.399	6.04088e-167
SORBS3	3.29229e-171	0.525015	0.419	0.221	9.90122e-167
HMGB3	5.56381e-171	-0.513784	0.103	0.361	1.67326e-166
TMEFF2	1.02469e-169	-0.973571	0.036	0.266	3.08166e-165
SLC25A39	4.64712e-165	-0.534195	0.39	0.634	1.39757e-160
PTGDS	6.53027e-165	1.39815	0.192	0.056	1.96391e-160
RARRES1	7.19082e-165	0.557345	0.365	0.159	2.16257e-160
CISD3	3.50279e-164	-0.517647	0.31	0.576	1.05343e-159
TNFRSF12A	4.60351e-164	0.653405	0.554	0.354	1.38446e-159
TUBA1A	4.70096e-164	0.630955	0.792	0.595	1.41377e-159
ACP1	1.46794e-163	-0.518914	0.385	0.629	4.41468e-159
ATP5G2	5.41882e-163	-1.13407	0.121	0.365	1.62966e-158
BHLHE40	5.38095e-161	0.536416	0.458	0.245	1.61827e-156
ENSA	7.83054e-160	-0.619588	0.514	0.717	2.35496e-155
GJA4	1.38656e-159	0.540138	0.157	0.038	4.16993e-155
C11orf31	1.40656e-159	-0.784344	0.102	0.345	4.23009e-155
IFI27	8.91103e-158	0.668533	0.586	0.334	2.6799e-153
ZBTB20	3.02567e-157	0.565683	0.613	0.411	9.0994e-153
MGST3	2.02916e-156	0.612949	0.765	0.661	6.10249e-152
LXN	2.90481e-155	0.512917	0.323	0.142	8.73594e-151
USMG5	9.60045e-155	-1.00721	0.118	0.358	2.88724e-150
ATP5G1	4.4652e-154	-0.735515	0.088	0.324	1.34286e-149
DNAJB1	4.84896e-154	0.531048	0.924	0.929	1.45828e-149
SNRPF	8.92177e-154	-0.53785	0.629	0.773	2.68313e-149
NR2F2	8.88659e-153	0.764993	0.524	0.332	2.67255e-148
GADD45B	6.27195e-152	0.790943	0.8	0.65	1.88623e-147
CRIP2	1.77105e-151	0.902973	0.586	0.413	5.32625e-147
ATP5I	2.56932e-151	-1.1172	0.123	0.362	7.72698e-147
IL6ST	7.93228e-151	0.5095	0.465	0.263	2.38555e-146
IL6	8.40629e-151	0.612797	0.179	0.051	2.52811e-146
ATP5E	2.02532e-150	-1.28606	0.126	0.367	6.09095e-146
GNB2L1	6.60107e-150	-1.39779	0.126	0.367	1.98521e-145
APOA1BP	1.08286e-149	-0.63201	0.059	0.281	3.2566e-145
ATP5J2	1.99726e-149	-0.836476	0.102	0.335	6.00656e-145
GTF2H5	8.27704e-149	-0.530565	0.413	0.636	2.48924e-144
RND3	2.89003e-148	0.638885	0.461	0.272	8.69148e-144
C17orf89	7.20531e-148	-0.673202	0.082	0.31	2.16692e-143
SNRPD1	3.04701e-147	-0.551318	0.577	0.727	9.16357e-143
TSPAN1	3.52258e-147	-0.545771	0.038	0.25	1.05938e-142
ATP5D	6.97881e-147	-0.750402	0.116	0.354	2.09881e-142
RRAD	1.45326e-146	0.521382	0.228	0.079	4.37053e-142
UBE2S	1.47124e-145	-0.913561	0.488	0.689	4.42462e-141
SHFM1	1.58023e-145	-0.923893	0.118	0.352	4.75239e-141
STRA13	2.54443e-145	-0.538244	0.064	0.285	7.65213e-141
GDF15	3.24815e-145	-1.0522	0.138	0.375	9.76849e-141
GPM6A	4.9857e-145	-0.765439	0.03	0.232	1.4994e-140
ICAM1	1.15262e-144	0.576426	0.381	0.185	3.4664e-140
C7orf73	1.04773e-143	-0.593382	0.078	0.304	3.15093e-139
PERP	1.17951e-143	-0.851567	0.31	0.55	3.54726e-139
ESD	4.99201e-143	0.515431	0.553	0.386	1.5013e-138
TCEB2	7.91018e-143	-0.886568	0.124	0.363	2.37891e-138
EGR4	3.01691e-142	-0.671254	0.037	0.244	9.07307e-138
ARL2	6.66633e-142	0.527029	0.644	0.516	2.00483e-137
RAB4A	2.02449e-141	-0.502649	0.375	0.604	6.08846e-137
ACPP	2.23171e-141	-0.89855	0.018	0.212	6.71165e-137
PHLDA3	5.64379e-141	0.606644	0.358	0.189	1.69731e-136
IGFBP3	1.12559e-140	1.06752	0.311	0.14	3.38509e-136
CD151	1.49083e-139	0.700309	0.693	0.568	4.48353e-135
SMS	3.79264e-139	-0.764407	0.377	0.611	1.1406e-134
AC090498.1	5.54635e-139	-1.09353	0.107	0.338	1.66801e-134
ATP5G3	1.94717e-137	-0.68076	0.103	0.329	5.85591e-133
ATP5L	1.0743e-136	-0.808538	0.124	0.364	3.23085e-132
C19orf81	1.84363e-136	-0.56125	0.045	0.248	5.54452e-132
DUSP1	4.64909e-136	0.560464	0.78	0.644	1.39817e-131
ATP5B	8.41357e-136	-0.60139	0.081	0.3	2.5303e-131
ATP5J	2.04175e-135	-0.679824	0.118	0.349	6.14036e-131
CCT3	4.66674e-135	-0.609993	0.588	0.746	1.40347e-130
C14orf2	1.24881e-133	-0.649898	0.119	0.357	3.75568e-129
AGR2	1.31171e-133	-1.28526	0.036	0.231	3.94484e-129
TRGC1	2.65959e-133	-0.831122	0.031	0.221	7.99846e-129
PHF6	1.19538e-132	-0.561706	0.111	0.331	3.59499e-128
UBE2M	2.04342e-132	-0.610066	0.294	0.526	6.14538e-128
CBX3	1.02573e-131	-0.548305	0.578	0.73	3.08478e-127
FGF7	1.38569e-131	0.509048	0.184	0.062	4.16733e-127
DSTN	2.55761e-131	0.77821	0.915	0.841	7.69175e-127
TCEB1	3.78009e-131	-0.516639	0.092	0.309	1.13682e-126
NBL1	3.81071e-131	0.651359	0.57	0.367	1.14603e-126
TFF3	3.92159e-131	-1.67118	0.272	0.482	1.17938e-126
SFRP1	5.16783e-131	0.984829	0.181	0.061	1.55417e-126
SEPT7	1.35311e-130	0.607004	0.722	0.607	4.06935e-126
LSM5	3.63693e-130	-0.520521	0.477	0.674	1.09377e-125
NGFRAP1	9.1399e-130	-0.998201	0.117	0.339	2.74873e-125
ALDOA	1.29514e-129	-0.742715	0.237	0.468	3.895e-125
GLTSCR2	3.00454e-129	-0.701724	0.124	0.358	9.03584e-125
ATP5O	6.04674e-129	-0.550226	0.106	0.332	1.8185e-124
C19orf43	3.29325e-128	-0.624213	0.111	0.337	9.90412e-124
SELENOK	5.34804e-128	0.571961	0.646	0.425	1.60837e-123
VAMP8	1.82117e-127	-0.530386	0.261	0.513	5.47699e-123
MZT2B	1.6101e-126	-0.544407	0.728	0.812	4.84221e-122
GPX1	2.98893e-126	-0.640497	0.12	0.352	8.98891e-122
SELK	5.06654e-126	-0.564001	0.106	0.325	1.52371e-121
PRDX2	1.77541e-124	-0.785218	0.648	0.751	5.33937e-120
PRSS23	2.70054e-124	0.748366	0.431	0.264	8.12159e-120
MT1M	7.59103e-124	0.61894	0.215	0.081	2.28293e-119
SOX4	6.56534e-123	-1.1693	0.632	0.723	1.97446e-118
RRBP1	5.18168e-122	0.541459	0.546	0.401	1.55834e-117
GNAI2	6.38915e-121	0.555368	0.565	0.4	1.92147e-116
CDKN2A	7.3728e-121	-0.659786	0.134	0.344	2.2173e-116
EPAS1	8.74378e-119	0.602888	0.36	0.193	2.62961e-114
TLN1	1.01135e-118	0.515079	0.514	0.357	3.04154e-114
RPL22L1	2.66781e-118	-0.626146	0.516	0.691	8.02318e-114
LPP	9.30834e-118	0.646802	0.526	0.38	2.79939e-113
CLU	4.23082e-117	1.1649	0.566	0.414	1.27238e-112
PEG10	1.98871e-116	-0.610713	0.057	0.248	5.98085e-112
EGR1	3.21649e-116	0.747842	0.724	0.602	9.67327e-112
PPA1	6.53004e-116	-0.596623	0.559	0.716	1.96384e-111
TPSAB1	6.02251e-115	1.90658	0.257	0.112	1.81121e-110
MAGED2	6.06083e-115	0.621582	0.519	0.377	1.82274e-110
FABP5	1.7481e-113	-1.02729	0.244	0.467	5.25724e-109
COX6C	2.52992e-113	-0.549846	0.915	0.916	7.60847e-109
AC020916.1	3.56637e-112	0.542781	0.321	0.163	1.07255e-107
ESAM	9.04765e-112	0.552503	0.188	0.068	2.72099e-107
TPSB2	3.1666e-111	1.81598	0.36	0.191	9.52322e-107
RAN	9.63872e-111	-0.540946	0.827	0.875	2.89875e-106
ADAMTS1	1.20265e-109	0.525917	0.29	0.14	3.61684e-105
RORB	4.29142e-109	-1.54813	0.09	0.258	1.2906e-104
MS4A2	7.97972e-109	0.612545	0.135	0.039	2.39982e-104
HOPX	4.17548e-108	0.607248	0.277	0.134	1.25574e-103
TBX3	5.01559e-108	-0.534775	0.247	0.461	1.50839e-103
GADD45G	1.08869e-107	-0.558975	0.156	0.366	3.27412e-103
APP	2.62083e-107	0.608604	0.607	0.508	7.88188e-103
HSPA6	4.20854e-107	0.807497	0.49	0.317	1.26568e-102
HIST1H2AC	3.68839e-106	-0.520942	0.13	0.326	1.10925e-101
DPT	3.68957e-106	0.620312	0.102	0.025	1.1096e-101
ARID5B	6.13364e-106	0.637522	0.633	0.532	1.84463e-101
CD44	5.64593e-104	0.518225	0.564	0.378	1.69796e-99
CPA3	6.34818e-104	1.20673	0.17	0.06	1.90915e-99
CSRP2	9.54064e-104	0.608139	0.402	0.227	2.86925e-99
JUNB	1.46784e-103	0.536508	0.911	0.876	4.41438e-99
HPGDS	6.23147e-103	0.642107	0.134	0.041	1.87405e-98
MCAM	7.57487e-103	0.609786	0.214	0.09	2.27807e-98
C8orf4	9.29877e-103	-0.636999	0.038	0.2	2.79651e-98
NR4A1	2.53881e-102	0.662266	0.707	0.618	7.63521e-98
TUBA4A	1.47526e-101	-0.698466	0.088	0.271	4.43669e-97
PAPSS1	2.46364e-97	-0.53831	0.177	0.36	7.40915e-93
LIMA1	3.07415e-96	0.506	0.47	0.329	9.2452e-92
CUTA	3.14639e-96	-0.526963	0.766	0.832	9.46246e-92
TACSTD2	1.18659e-92	-0.95678	0.158	0.327	3.56856e-88
IGF1	2.7468e-91	0.594787	0.217	0.095	8.26073e-87
DUSP2	3.0821e-90	-0.905233	0.207	0.398	9.26911e-86
CD81	1.35951e-88	0.809886	0.747	0.624	4.0886e-84
ISG20	2.6989e-85	-0.757339	0.193	0.366	8.11668e-81
COX20	4.00184e-85	-0.517964	0.508	0.656	1.20351e-80
NDUFA4L2	2.18664e-84	0.928632	0.22	0.103	6.57611e-80
SRSF7	1.48358e-83	-0.539564	0.634	0.784	4.46172e-79
RPS17	3.05409e-83	-0.898847	0.755	0.847	9.18487e-79
PDLIM5	1.5749e-77	-1.06824	0.451	0.564	4.73636e-73
SERTAD1	3.55387e-77	0.569826	0.716	0.628	1.06879e-72
BTG1	4.83915e-74	-0.719092	0.881	0.948	1.45533e-69
CXCL2	5.48684e-74	0.928256	0.451	0.317	1.65011e-69
CCNG2	1.10181e-71	-0.541517	0.119	0.264	3.31358e-67
YIPF6	8.2122e-71	-0.614371	0.207	0.384	2.46974e-66
CXCR4	8.57218e-71	-1.57152	0.206	0.361	2.578e-66
KLK1	4.13551e-70	-1.74137	0.049	0.172	1.24371e-65
CEBPD	1.5641e-69	0.648092	0.603	0.515	4.70386e-65
JPT1	3.92131e-69	-0.934279	0.397	0.462	1.1793e-64
AL589182.1	4.44135e-69	-0.630809	0.02	0.13	1.33569e-64
KRT19	4.48092e-69	-1.1472	0.201	0.352	1.34759e-64
RPL31	7.50736e-68	-0.60423	0.958	0.981	2.25776e-63
C6orf15	1.98023e-67	-1.95237	0.448	0.24	5.95536e-63
ANGPT2	1.80075e-66	0.574466	0.191	0.092	5.41556e-62
H2AFV	1.62666e-65	-0.524532	0.575	0.703	4.89202e-61
SFN	3.74423e-64	-0.610071	0.098	0.232	1.12604e-59
RBP1	8.32772e-64	-0.674034	0.538	0.338	2.50448e-59
TRBC2	7.2328e-63	-0.949079	0.059	0.176	2.17519e-58
BAALC	1.12515e-61	-0.866598	0.036	0.144	3.38379e-57
AQP1	2.55966e-61	0.528719	0.163	0.074	7.69793e-57
HES4	1.17293e-55	0.550392	0.53	0.448	3.52748e-51
CD3D	4.40056e-55	-0.840404	0.045	0.147	1.32342e-50
PPP3CA	1.59001e-53	-0.730064	0.304	0.433	4.7818e-49
ACTN4	1.04952e-52	0.520416	0.531	0.457	3.15631e-48
WFDC2	4.57273e-52	-0.800374	0.108	0.226	1.3752e-47
CD3E	3.66008e-50	-0.668052	0.04	0.133	1.10073e-45
HMGB2	1.12442e-48	-0.704545	0.309	0.432	3.38157e-44
CD2	1.15043e-48	-0.74636	0.036	0.125	3.45979e-44
CLEC11A	1.22737e-48	0.601907	0.487	0.426	3.6912e-44
HIST1H1C	5.58438e-48	-0.705065	0.141	0.265	1.67945e-43
MMP7	2.29339e-43	-1.03323	0.102	0.206	6.89713e-39
IL7R	2.64509e-43	-1.03524	0.063	0.154	7.95484e-39
CORO1A	2.01432e-40	-0.545824	0.096	0.193	6.05788e-36
LTB	7.89429e-40	-0.741031	0.039	0.118	2.37413e-35
EEF2	1.31199e-39	-0.684908	0.969	0.96	3.94567e-35
PTPRC	1.49729e-36	-0.513257	0.079	0.164	4.50296e-32
CD7	1.07204e-34	-0.890249	0.073	0.154	3.22406e-30
HCST	5.44407e-34	-0.618114	0.145	0.243	1.63725e-29
GPX3	2.27621e-33	0.855791	0.244	0.174	6.84548e-29
DUSP4	5.784e-33	-0.523777	0.174	0.276	1.73948e-28
DLX5	3.43681e-32	-0.559031	0.051	0.123	1.03359e-27
CLDN5	8.11517e-32	0.847271	0.105	0.052	2.44055e-27
PLVAP	2.8057e-30	0.673462	0.118	0.063	8.43787e-26
CFD	1.40003e-27	2.25602	0.296	0.24	4.21046e-23
MTRNR2L1	2.3718e-26	0.631377	0.255	0.197	7.13294e-22
CCL5	9.38404e-25	-1.3427	0.1	0.17	2.82216e-20
SSR4	3.0274e-24	-0.622681	0.927	0.919	9.10459e-20
SLC9A3R2	7.617e-24	0.756267	0.379	0.334	2.29074e-19
GPR183	8.48902e-24	-0.609961	0.081	0.145	2.55299e-19
TPD52L1	4.3592e-23	-0.581942	0.139	0.211	1.31098e-18
HLA-DQB1	2.22074e-22	-0.606318	0.123	0.192	6.67865e-18
CST7	9.08756e-22	-0.606392	0.067	0.125	2.73299e-17
NKG7	1.0073e-21	-0.948839	0.059	0.116	3.02934e-17
TUBB2B	3.8077e-21	-0.562556	0.113	0.174	1.14513e-16
PECAM1	5.03402e-21	0.533565	0.14	0.09	1.51393e-16
IGKC	5.64954e-21	-2.54019	0.612	0.558	1.69904e-16
ID2	4.39413e-19	0.655759	0.607	0.564	1.32149e-14
RPN2	6.95355e-19	-0.563755	0.421	0.522	2.09121e-14
HLA-DQA1	1.36629e-18	-0.684212	0.096	0.153	4.10898e-14
HLA-DRB5	4.9842e-18	-0.536375	0.154	0.218	1.49895e-13
CAMK2N1	6.94547e-18	-0.658372	0.372	0.463	2.08878e-13
HIST1H4C	3.29743e-16	-0.666237	0.563	0.641	9.91668e-12
HLA-DRB1	4.10684e-16	-0.866267	0.235	0.298	1.23509e-11
VWF	5.62852e-16	0.781981	0.136	0.093	1.69272e-11
IGHM	2.05666e-14	-1.32843	0.187	0.134	6.18519e-10
FOS	3.33671e-13	0.50168	0.758	0.775	1.00348e-08
PCCA	2.09966e-11	-0.835627	0.146	0.187	6.31453e-07
HLA-DRA	9.38599e-11	-1.13331	0.35	0.397	2.82274e-06
RAMP2	2.41491e-10	0.752113	0.248	0.22	7.26261e-06
CCL4	1.11027e-09	-1.05791	0.191	0.242	3.33902e-05
BIRC3	1.2571e-09	0.574538	0.345	0.301	3.7806e-05
CCL4L2	5.10897e-08	-0.775881	0.101	0.139	0.00153647
APOC1	7.52217e-08	-0.667145	0.257	0.221	0.00226222
IL1B	3.52562e-07	-0.683189	0.071	0.1	0.0106029
