# Supplementary material for: Single-cell RNA combined with bulk RNA analysis to explore oxidative stress and energy metabolism factors and found a new prostate cancer oncogene MXRA8
Source: Aging (Albany NY). 2024 Mar 4;16(5):4469–502. doi: 10.18632/aging.205599 (PMC10968713; doi:10.18632/aging.205599)
Supplement: Supplementary Table 3 [file aging-16-205599-s004.xlsx]

## Sheet: deg_res
Supplementary Table 3. TCGA_ PRAD queue Tumor_ VS_ Differential expression analysis of Normal and differential analysis of OS gene set ssGSEA enrichment.
gene	log2FC	pvalue	adjusted_pvalue	sig
GCNT4	-0.814356	2.26785e-60	4.43092e-56	down
C2orf88	-1.29238	2.20458e-56	2.15365e-52	down
HPN	2.65141	1.7091e-54	8.34809e-51	up
TMLHE	-0.839901	1.61907e-53	6.32669e-50	down
CA14	-1.17621	1.49064e-49	4.83883e-46	down
PIK3C2G	-0.771661	1.73364e-49	4.83883e-46	down
KCNJ15	-0.901869	1.8839e-48	4.60095e-45	down
SIM2	2.06829	4.5637e-48	9.51994e-45	up
PAK3	-0.639547	5.35978e-48	9.51994e-45	down
PLAAT5	-0.628365	1.53275e-47	2.49558e-44	down
MARCKSL1	1.55166	2.45365e-47	3.68765e-44	up
SLC2A9	-0.919435	1.23386e-46	1.72195e-43	down
GNAO1	-1.24224	6.9297e-46	9.02616e-43	down
CXCR2	-0.656922	1.06851e-45	1.30478e-42	down
PRR36	1.54308	1.28772e-45	1.47996e-42	up
ASPA	-0.833851	2.09454e-45	2.27351e-42	down
PYCR1	1.46106	1.52306e-44	1.56618e-41	up
ANGPT1	-1.55332	5.66721e-44	5.53629e-41	down
PPARGC1A	-0.766985	1.0667e-43	9.47325e-41	down
NECAB1	-0.875493	1.27178e-43	1.08035e-40	down
PHYHIPL	-0.87773	3.73449e-43	3.04019e-40	down
QPRT	-1.40219	6.137e-43	4.61172e-40	down
AOX1	-2.07358	1.21316e-42	8.77875e-40	down
SLC19A1	1.10296	2.40311e-42	1.61903e-39	up
C8orf88	-1.51955	2.67321e-42	1.74097e-39	down
SERPINA5	-1.92192	8.12447e-42	5.12051e-39	down
RAB17	1.29975	4.19708e-41	2.56258e-38	up
LURAP1	-0.863717	5.94585e-41	3.5203e-38	down
RAB9B	-1.17726	1.10769e-40	6.36533e-38	down
CRTAC1	-1.45735	5.01856e-40	2.72369e-37	down
CGREF1	1.63591	6.90252e-40	3.63988e-37	up
SBSPON	-1.65115	7.07931e-40	3.63988e-37	down
EVX2	-0.642201	8.68071e-40	4.34881e-37	down
GPRC5B	-1.33236	3.09745e-39	1.51295e-36	down
PODXL2	1.67568	6.12076e-39	2.91676e-36	up
GSTM3	-1.73981	1.0425e-38	4.52629e-36	down
TRPM4	1.73532	1.37521e-38	5.84105e-36	up
ULK3	0.952978	1.98395e-38	8.24734e-36	up
TRIM36	1.34949	2.36337e-38	9.60736e-36	up
IGSF1	-0.761458	2.40946e-38	9.60736e-36	down
APOBEC3C	-2.05074	4.88162e-38	1.79957e-35	down
SBK1	1.12089	6.07611e-38	2.15846e-35	up
ZNF154	-0.64528	1.0382e-37	3.55866e-35	down
SAMD12	-0.84569	1.13231e-37	3.81434e-35	down
UBXN10	-0.960912	1.66557e-37	5.42364e-35	down
FAM83B	-0.8334	2.38733e-37	7.6465e-35	down
NYNRIN	-1.40168	5.25926e-37	1.65735e-34	down
LRFN1	0.898514	5.61015e-37	1.73986e-34	up
PCP4L1	-1.72797	7.47163e-37	2.28095e-34	down
STX19	1.53834	1.12762e-36	3.38945e-34	up
CDIN1	-0.595672	2.12289e-36	6.28439e-34	down
SEMA6D	-0.739296	2.32205e-36	6.77139e-34	down
LMO3	-1.02681	3.78973e-36	1.08888e-33	down
MAMLD1	-0.800615	1.67142e-35	4.45079e-33	down
ENTR1	0.743835	1.68573e-35	4.45079e-33	up
PAQR8	-1.2331	1.85865e-35	4.84191e-33	down
EFNB1	-1.16843	2.26944e-35	5.83424e-33	down
EYA4	-0.735129	2.62858e-35	6.66976e-33	down
C11orf45	-0.624758	3.17723e-35	7.95857e-33	down
PADI3	-0.879278	3.26668e-35	8.07903e-33	down
ALDH1L2	-0.723819	3.3148e-35	8.09556e-33	down
ADRA1A	-0.985118	4.10028e-35	9.76967e-33	down
ARHGAP20	-0.791152	5.04684e-35	1.18801e-32	down
EPHA10	0.84305	7.23028e-35	1.66194e-32	up
SAMD10	0.862406	8.93298e-35	2.02945e-32	up
GNAZ	-1.28554	1.54129e-34	3.42201e-32	down
GOLM1	2.08262	1.79684e-34	3.94458e-32	up
KLHL14	-0.890465	3.12833e-34	6.64362e-32	down
NRG2	-0.671039	3.40512e-34	7.15368e-32	down
MCF2	-0.794502	4.29602e-34	8.92932e-32	down
COL4A6	-1.41918	4.35583e-34	8.95834e-32	down
ARHGEF38	1.25873	5.01208e-34	1.02006e-31	up
RPE65	-0.742231	7.01983e-34	1.41395e-31	down
H2AW	1.74847	9.13202e-34	1.80224e-31	up
PLLP	-0.77895	1.09411e-33	2.13768e-31	down
PCDH7	-1.31766	1.66234e-33	3.21573e-31	down
C22orf23	-0.661567	2.63274e-33	5.04298e-31	down
TMEM132C	-0.879121	2.83189e-33	5.37179e-31	down
TMEM252	-1.41518	3.49415e-33	6.5643e-31	down
GATM	-0.940318	4.27596e-33	7.95654e-31	down
EPHB1	-0.674398	4.68222e-33	8.63029e-31	down
ICA1	0.879236	5.08338e-33	9.28215e-31	up
PRICKLE2	-0.947606	5.37265e-33	9.71952e-31	down
GNL3	0.868256	5.87546e-33	1.05316e-30	up
PDE7B	-0.784983	6.35567e-33	1.12888e-30	down
RBMS3	-0.868684	6.99297e-33	1.22548e-30	down
KCTD14	-1.22108	7.02499e-33	1.22548e-30	down
ACOX2	-1.23812	9.14544e-33	1.5674e-30	down
LGR6	-1.32873	1.09176e-32	1.85485e-30	down
RND2	-0.844146	1.12764e-32	1.89929e-30	down
GNAL	-0.9751	1.21557e-32	2.02989e-30	down
DUOX1	-1.38099	1.31998e-32	2.18558e-30	down
PKP3	0.91623	1.66817e-32	2.73888e-30	up
PIP5K1B	-0.762733	1.91283e-32	3.1144e-30	down
ESRP2	1.09238	1.9482e-32	3.14578e-30	up
PNMT	-1.301	2.18629e-32	3.48019e-30	down
ABHD6	-0.71408	2.19093e-32	3.48019e-30	down
TRAF4	0.981942	2.46768e-32	3.8882e-30	up
DUOXA1	-1.39668	2.5481e-32	3.98278e-30	down
NDRG4	-0.9014	2.83663e-32	4.39857e-30	down
ETNK2	-0.980118	3.24439e-32	4.95226e-30	down
HFE	-0.914962	4.57896e-32	6.82928e-30	down
FOXA1	1.50396	5.30001e-32	7.84481e-30	up
SLC25A22	0.908519	7.8729e-32	1.15655e-29	up
GPX2	-1.94906	9.15107e-32	1.33428e-29	down
STAC	-1.4886	9.65985e-32	1.39803e-29	down
ARHGEF26	1.42067	1.40688e-31	2.02115e-29	up
JPH4	-1.58185	1.9882e-31	2.83544e-29	down
BIK	1.2678	3.17692e-31	4.46551e-29	up
POLR2H	0.802078	3.57875e-31	4.95898e-29	up
QSOX2	0.736585	3.6185e-31	4.97875e-29	up
CLU	-2.01384	3.66907e-31	5.01303e-29	down
GRK2	0.702309	3.94144e-31	5.27451e-29	up
SLMAP	-0.924778	5.63545e-31	7.49017e-29	down
MICALL1	-0.748203	6.87399e-31	9.07459e-29	down
HOXC6	1.59346	7.98968e-31	1.04068e-28	up
ABCG2	-1.30229	8.04815e-31	1.04136e-28	down
AFAP1L2	-1.24178	8.36331e-31	1.07502e-28	down
SOSTDC1	-0.878746	8.60393e-31	1.08567e-28	down
SNAP25	-1.06312	9.72806e-31	1.21838e-28	down
CAV2	-1.17308	1.04353e-30	1.29863e-28	down
SLC27A4	0.789676	1.05563e-30	1.30537e-28	up
ST6GALNAC4	-1.11116	1.37064e-30	1.68425e-28	down
ADAMTS5	-0.846806	1.53471e-30	1.87407e-28	down
PLEKHA2	-1.03392	1.6424e-30	1.99312e-28	down
HSPA4L	-0.671425	1.83305e-30	2.21075e-28	down
FAXDC2	-1.27453	1.9353e-30	2.3056e-28	down
SYNGR2	0.869263	2.05559e-30	2.4253e-28	up
FRMD6	-1.29453	2.06059e-30	2.4253e-28	down
PRKG1	-0.924924	2.5162e-30	2.9438e-28	down
SCARA3	-1.56442	3.24195e-30	3.77031e-28	down
CCBE1	-0.650019	3.54662e-30	4.10023e-28	down
CLCA2	-1.11648	5.97576e-30	6.82775e-28	down
GLIS3	-0.7222	6.38545e-30	7.25342e-28	down
RAP1GAP	1.45783	6.86512e-30	7.71088e-28	up
SPDEF	1.7027	8.26114e-30	9.06777e-28	up
BYSL	0.624827	8.41063e-30	9.18027e-28	up
SMR3B	-0.782956	8.66686e-30	9.4074e-28	down
CYP4B1	-1.891	9.05697e-30	9.77652e-28	down
APOBEC3G	-1.03817	9.50617e-30	1.0205e-27	down
TMEM120B	0.612424	1.07237e-29	1.1387e-27	up
SMPDL3B	1.4402	1.15425e-29	1.21902e-27	up
MPP2	-0.947419	1.16382e-29	1.22251e-27	down
TSPAN18	-1.31812	1.2069e-29	1.25943e-27	down
CNTFR	-1.19274	1.21186e-29	1.25943e-27	down
TSLP	-0.832258	1.41071e-29	1.45046e-27	down
HOXD13	-1.60295	1.41794e-29	1.45046e-27	down
LPCAT2	-1.01914	1.48444e-29	1.51057e-27	down
EIF3B	0.664754	1.55394e-29	1.5731e-27	up
PRKCB	-1.0463	1.60338e-29	1.61479e-27	down
LARGE1	-0.857172	2.16318e-29	2.14539e-27	down
CBX8	0.722062	2.376e-29	2.33278e-27	up
MYOCD	-1.30273	2.67114e-29	2.60944e-27	down
AQP5	-0.749942	3.44187e-29	3.3373e-27	down
CPNE6	-0.873241	3.45037e-29	3.3373e-27	down
PLBD1	-1.06506	3.50507e-29	3.3735e-27	down
TGFBR3	-1.226	3.85839e-29	3.68586e-27	down
GATA3	-1.71694	3.86734e-29	3.68586e-27	down
GSTM4	-0.956444	4.8026e-29	4.53301e-27	down
DAAM2	-1.27766	4.92378e-29	4.62504e-27	down
HOXB13	1.49976	4.96881e-29	4.64501e-27	up
CFL2	-1.19638	6.21217e-29	5.77968e-27	down
TMEM35A	-1.76044	6.85535e-29	6.28826e-27	down
MOGS	0.64341	7.0368e-29	6.42453e-27	up
PTGS1	-1.59011	8.60818e-29	7.78641e-27	down
ANO1	-1.50484	8.65472e-29	7.79244e-27	down
HID1	0.852978	1.02853e-28	9.17595e-27	up
CAMK2G	-0.793025	1.03862e-28	9.2239e-27	down
LAPTM4A	-0.617542	1.16628e-28	1.03107e-26	down
TLCD1	1.20484	1.18509e-28	1.04299e-26	up
NUDT19	0.662371	1.19523e-28	1.0472e-26	up
ME1	-1.1974	1.21225e-28	1.05737e-26	down
SLC47A1	-0.587404	1.35668e-28	1.17808e-26	down
POLD2	0.750666	1.38939e-28	1.20114e-26	up
COLCA2	-0.691276	1.40279e-28	1.20738e-26	down
CACFD1	0.824055	1.45494e-28	1.24678e-26	up
DBNDD1	1.1349	1.82026e-28	1.55302e-26	up
PGRMC1	-0.813602	2.22425e-28	1.88128e-26	down
CERS4	0.991281	2.24238e-28	1.88844e-26	up
LYVE1	-0.91215	2.36021e-28	1.97913e-26	down
PPP1R3C	-1.44462	2.41243e-28	2.01428e-26	down
TMEM184A	1.04915	2.65436e-28	2.20214e-26	up
PPP1R14B	1.21725	2.65997e-28	2.20214e-26	up
ENTPD6	0.78463	2.97637e-28	2.45368e-26	up
SLC16A5	-1.48782	3.04406e-28	2.49894e-26	down
TMEM132A	1.36821	3.34094e-28	2.73118e-26	up
GSTP1	-1.97032	3.56748e-28	2.90422e-26	down
RAB11FIP2	-0.817002	3.93164e-28	3.1874e-26	down
FUT3	-0.762158	4.07514e-28	3.26312e-26	down
PDZRN4	-1.21507	4.54396e-28	3.62367e-26	down
B3GALT6	0.866804	4.67771e-28	3.71517e-26	up
DUS1L	1.01077	5.00014e-28	3.95517e-26	up
C12orf75	-1.3806	5.38082e-28	4.23913e-26	down
FEZ1	-0.809191	6.42008e-28	5.03757e-26	down
FAAP100	0.625007	6.53024e-28	5.10351e-26	up
RAB7B	-0.960588	6.60613e-28	5.12185e-26	down
C10orf99	-0.58703	7.05602e-28	5.44903e-26	down
VSNL1	-0.919233	7.28755e-28	5.58369e-26	down
RGS10	1.20012	8.33552e-28	6.33694e-26	up
CTTNBP2	-0.641753	8.75387e-28	6.62919e-26	down
EPCAM	1.18909	9.77778e-28	7.376e-26	up
MED21	-0.602741	1.02599e-27	7.68035e-26	down
RNF180	-0.725333	1.22475e-27	9.13326e-26	down
AKR1B1	-1.56044	1.23604e-27	9.18245e-26	down
DOK4	-0.93124	1.34247e-27	9.93526e-26	down
INSYN1	-0.905432	1.43537e-27	1.05827e-25	down
SLC26A6	0.944142	1.49188e-27	1.09581e-25	up
ERGIC1	0.867583	1.5167e-27	1.10986e-25	up
SLC39A2	-1.81933	1.58124e-27	1.14849e-25	down
TMEM238L	-0.98898	1.63309e-27	1.18175e-25	down
C20orf194	-0.828842	1.86972e-27	1.34799e-25	down
TMEM37	-0.942624	1.96151e-27	1.40381e-25	down
COL17A1	-1.85659	2.00505e-27	1.42973e-25	down
ZNF185	-1.53052	2.04943e-27	1.45606e-25	down
AHNAK2	-1.07523	2.23299e-27	1.58073e-25	down
ANO6	-1.20941	2.27461e-27	1.60438e-25	down
METTL24	-0.655567	2.29915e-27	1.61586e-25	down
RBFOX3	-1.15047	2.30874e-27	1.61678e-25	down
KCNJ5	-0.972858	2.83064e-27	1.96815e-25	down
WWC3	-0.801665	3.00156e-27	2.07225e-25	down
B3GNT8	-0.941875	3.04548e-27	2.09516e-25	down
RIMS3	-0.603478	3.07433e-27	2.10759e-25	down
BOP1	1.03878	3.10544e-27	2.12147e-25	up
ARL4D	-1.36921	3.15925e-27	2.15071e-25	down
C16orf74	-0.844672	3.27934e-27	2.22471e-25	down
FGF10	-0.834852	3.39311e-27	2.29393e-25	down
CAV1	-1.65045	3.42528e-27	2.30769e-25	down
ANO5	-0.901233	3.60487e-27	2.42034e-25	down
CAMKK2	1.46778	3.97027e-27	2.65655e-25	up
DENND2B	-0.986691	4.06416e-27	2.71009e-25	down
CHP2	-1.07967	4.2489e-27	2.82364e-25	down
ACTC1	-2.34625	4.32279e-27	2.863e-25	down
PENK	-1.3399	4.83889e-27	3.16195e-25	down
SLCO3A1	-0.720538	5.23201e-27	3.40743e-25	down
TTLL12	0.851549	5.74801e-27	3.73105e-25	up
SOX15	-1.09337	6.07697e-27	3.93152e-25	down
LRRC56	0.879072	6.9185e-27	4.46118e-25	up
MCC	-1.08024	8.4094e-27	5.33451e-25	down
EMX2	-1.12059	8.71675e-27	5.51158e-25	down
AMACR	2.55788	1.06269e-26	6.69767e-25	up
SYNE4	0.924121	1.13798e-26	7.10349e-25	up
SPTBN2	1.07534	1.19156e-26	7.39709e-25	up
ACSS1	0.811065	1.19259e-26	7.39709e-25	up
CYP4F22	-1.09005	1.31037e-26	8.1019e-25	down
PGAP4	-1.14851	1.3182e-26	8.12457e-25	down
JPT2	0.678262	1.51725e-26	9.29282e-25	up
MAMDC2	-0.971859	1.67664e-26	1.02127e-24	down
KATNAL1	-0.608202	1.6779e-26	1.02127e-24	down
HIF3A	-0.717458	1.71146e-26	1.03846e-24	down
FAM107A	-1.59409	1.73906e-26	1.04869e-24	down
VARS1	0.624127	1.81448e-26	1.09081e-24	up
EID3	-0.669887	1.82989e-26	1.0967e-24	down
PGR	-0.666778	1.97709e-26	1.1777e-24	down
FERMT2	-1.14253	2.00496e-26	1.19067e-24	down
VAV2	0.719142	2.21008e-26	1.30606e-24	up
CREB3L4	1.08717	2.47402e-26	1.45594e-24	up
NUP210	1.05787	2.50468e-26	1.46956e-24	up
SLC8A1	-0.9138	2.79515e-26	1.62535e-24	down
UNC5B	-1.31765	3.07435e-26	1.78239e-24	down
NDRG2	-1.18574	3.4331e-26	1.97282e-24	down
ITGB3	-0.603654	3.72397e-26	2.12746e-24	down
G0S2	-1.41584	4.04747e-26	2.29882e-24	down
SLITRK6	-1.19538	4.24889e-26	2.40623e-24	down
SNCG	-1.77133	4.26577e-26	2.40881e-24	down
ALDH1A2	-1.19248	4.67806e-26	2.63306e-24	down
ARVCF	0.727644	4.68986e-26	2.63306e-24	up
DLX1	2.47179	5.0728e-26	2.83178e-24	up
MR1	-0.889164	5.48304e-26	3.0434e-24	down
CALM1	-0.771062	6.15714e-26	3.39825e-24	down
ID4	-1.71097	6.66895e-26	3.67037e-24	down
B3GNT9	-1.08479	7.61242e-26	4.16615e-24	down
FAT2	-0.86628	7.72486e-26	4.21587e-24	down
NAV2	-0.790294	8.05075e-26	4.35722e-24	down
TOR2A	0.588633	8.1952e-26	4.42315e-24	up
MFSD2A	-1.24961	8.56297e-26	4.60191e-24	down
KITLG	-1.10044	9.0131e-26	4.81142e-24	down
FBXO17	-1.02681	9.34385e-26	4.97439e-24	down
NECTIN2	0.763778	9.68219e-26	5.12657e-24	up
BHMT2	-0.972811	1.00209e-25	5.29157e-24	down
TP63	-1.76511	1.01602e-25	5.34357e-24	down
ZNF516	-1.0004	1.01741e-25	5.34357e-24	down
TCF7L1	-1.00505	1.17696e-25	6.13213e-24	down
MYLK	-2.0323	1.20686e-25	6.27118e-24	down
TPM1	-1.31409	1.29852e-25	6.72386e-24	down
NCLN	0.633357	1.30086e-25	6.72386e-24	up
GPM6A	-0.85188	1.56138e-25	8.04913e-24	down
GPR87	-1.43953	1.58659e-25	8.13616e-24	down
ZMYND19	0.698064	1.6011e-25	8.1891e-24	up
ST6GALNAC2	-0.81898	1.60773e-25	8.2015e-24	down
SAPCD2	1.04646	1.63552e-25	8.29992e-24	up
PDCD2L	0.614723	1.73724e-25	8.79329e-24	up
VPS37C	0.621992	1.92864e-25	9.7369e-24	up
ANGPTL1	-1.07385	1.99482e-25	1.00451e-23	down
MAL	-1.16182	2.1596e-25	1.0819e-23	down
PLP2	-1.22993	2.21856e-25	1.1086e-23	down
PLA2G4A	-1.14586	2.26293e-25	1.12788e-23	down
STK26	-1.05194	2.43433e-25	1.20715e-23	down
FAM83H	0.904116	2.55882e-25	1.26568e-23	up
LRIG1	1.06362	2.94561e-25	1.44239e-23	up
MECOM	-0.884762	3.14947e-25	1.53836e-23	down
DMD	-1.02837	3.21769e-25	1.56776e-23	down
ACSS3	-0.605392	3.27667e-25	1.59253e-23	down
GJB5	-1.28573	3.70836e-25	1.79787e-23	down
PARVA	-0.727907	3.80018e-25	1.83328e-23	down
SEC23A	-0.877839	5.08974e-25	2.41367e-23	down
CRYAB	-1.77078	5.21302e-25	2.46615e-23	down
SRM	0.86624	5.54152e-25	2.60892e-23	up
HSPB8	-2.06287	5.6871e-25	2.67102e-23	down
NT5E	-1.04211	6.04266e-25	2.82444e-23	down
FGFRL1	1.3064	6.64014e-25	3.07429e-23	up
CDC42EP4	-0.849399	6.85862e-25	3.16794e-23	down
ARHGEF40	-0.892681	7.92157e-25	3.64168e-23	down
GLIS1	-0.992717	8.10259e-25	3.71616e-23	down
S100A14	-1.86864	8.4825e-25	3.88129e-23	down
CCDC8	-1.20356	9.00365e-25	4.10054e-23	down
RAB38	-0.784398	9.70134e-25	4.38761e-23	down
SEC16A	0.797123	1.04574e-24	4.68615e-23	up
ARHGAP23	-1.11798	1.08224e-24	4.83863e-23	down
FGFR2	-1.48411	1.1704e-24	5.20895e-23	down
RCBTB2	-0.748722	1.17388e-24	5.21257e-23	down
SLC25A33	0.761529	1.24633e-24	5.4968e-23	up
DVL1	0.696562	1.28595e-24	5.65875e-23	up
RBP1	-1.17949	1.51197e-24	6.59392e-23	down
NEURL1B	-0.998825	1.53089e-24	6.66159e-23	down
MYZAP	-1.03545	1.66255e-24	7.21843e-23	down
MAP1A	-0.973785	1.75413e-24	7.58234e-23	down
B3GALT2	-0.856065	1.83823e-24	7.91372e-23	down
KAT2A	0.896176	1.83889e-24	7.91372e-23	up
PTRHD1	0.877972	1.91412e-24	8.20134e-23	up
CPLX1	0.90153	1.92692e-24	8.23811e-23	up
PLEKHG3	-0.706712	2.33534e-24	9.91911e-23	down
PGF	-0.812835	2.50648e-24	1.05999e-22	down
JAZF1	-1.14884	2.54849e-24	1.07543e-22	down
TNK2	0.793357	2.93904e-24	1.23756e-22	up
KCNJ3	-1.1622	3.16489e-24	1.3298e-22	down
RHEX	-0.667486	3.37317e-24	1.41427e-22	down
PLCL1	-0.991263	3.40538e-24	1.42472e-22	down
CAMSAP3	0.731277	3.4985e-24	1.46055e-22	up
IQANK1	1.17672	3.80655e-24	1.58239e-22	up
ZDHHC9	0.789794	3.91613e-24	1.62449e-22	up
CTF1	-1.24443	4.05391e-24	1.67808e-22	down
TPRN	0.937545	4.26628e-24	1.76225e-22	up
NME1	0.886587	4.35895e-24	1.79673e-22	up
SGCB	-0.964368	4.51826e-24	1.85848e-22	down
MGAT4B	0.652324	4.97058e-24	2.0317e-22	up
GSTM5	-1.02173	5.43062e-24	2.20245e-22	down
MUC15	-0.796524	5.4334e-24	2.20245e-22	down
FRMD3	-0.63355	5.76762e-24	2.33308e-22	down
MYORG	-0.750055	5.86522e-24	2.36766e-22	down
NCAM1	-1.00897	5.88132e-24	2.36926e-22	down
CLIP4	-0.848313	6.05239e-24	2.43316e-22	down
LPAR1	-1.01252	6.2315e-24	2.50002e-22	down
SCARB1	0.682621	6.85416e-24	2.73858e-22	up
SLC18A2	-0.999355	7.11609e-24	2.83743e-22	down
SRD5A2	-1.50248	7.55791e-24	3.00135e-22	down
ANP32E	-0.993302	7.69893e-24	3.05115e-22	down
MEX3D	0.742056	8.10908e-24	3.20719e-22	up
CACHD1	-0.932952	8.38721e-24	3.30382e-22	down
BDH1	0.741121	8.49154e-24	3.33818e-22	up
FBXO30	-0.595872	9.8152e-24	3.82011e-22	down
RCC1	0.802041	9.85378e-24	3.82651e-22	up
RGS7BP	-0.771027	1.251e-23	4.81226e-22	down
FNDC10	1.25763	1.25122e-23	4.81226e-22	up
GRAMD1A	0.660581	1.25796e-23	4.82867e-22	up
C3orf70	-0.963996	1.38986e-23	5.32453e-22	down
RHPN1	1.23815	1.44977e-23	5.54319e-22	up
EZH2	0.69581	1.45673e-23	5.5589e-22	up
KLF16	0.798687	1.48601e-23	5.64855e-22	up
ST14	0.731181	1.74074e-23	6.57847e-22	up
SNX7	-0.985926	1.87106e-23	7.01664e-22	down
BMERB1	-1.04556	2.21762e-23	8.23723e-22	down
GPR160	1.1374	2.23787e-23	8.29667e-22	up
EIF2AK1	0.59773	2.37184e-23	8.77672e-22	up
PJA1	-0.719	2.5045e-23	9.25006e-22	down
RRP12	0.604792	2.54451e-23	9.36247e-22	up
SEMG1	-3.42514	2.55338e-23	9.37744e-22	down
ENTPD3	-0.821296	2.76439e-23	1.01144e-21	down
MAT2B	-0.626915	2.8729e-23	1.04917e-21	down
DNAJB5	-1.11373	3.24132e-23	1.18151e-21	down
CCDC69	-1.1829	3.37439e-23	1.22544e-21	down
NMRAL1	0.740628	3.39243e-23	1.22971e-21	up
MSI1	0.844507	3.6809e-23	1.32934e-21	up
AQP2	-1.37589	3.80478e-23	1.36902e-21	down
LRRN3	-0.695917	3.8151e-23	1.37021e-21	down
PLCD1	-0.585973	4.15479e-23	1.48403e-21	down
AJUBA	-0.942137	4.19109e-23	1.49426e-21	down
LDB3	-1.5421	4.49665e-23	1.60028e-21	down
CPA6	-1.2483	4.52142e-23	1.60617e-21	down
SLC25A10	0.997858	4.73329e-23	1.67534e-21	up
CAPN6	-1.36315	4.78947e-23	1.69216e-21	down
CSRP1	-1.47848	4.91044e-23	1.73177e-21	down
RAC3	1.1578	5.00262e-23	1.75793e-21	up
FILIP1	-0.632378	5.28803e-23	1.84854e-21	down
CHRDL1	-1.9742	5.28886e-23	1.84854e-21	down
FOLR1	-0.915928	5.42321e-23	1.89212e-21	down
PRAC1	2.02542	5.4512e-23	1.89512e-21	up
MEIS1	-0.818584	5.46982e-23	1.89535e-21	down
SCPEP1	-0.873765	5.55962e-23	1.92255e-21	down
VWA5A	-1.004	5.69537e-23	1.96601e-21	down
KCNAB1	-1.12193	5.9505e-23	2.05046e-21	down
RPS2	0.888173	6.28091e-23	2.1567e-21	up
CYP3A5	-1.19019	6.52268e-23	2.23579e-21	down
ARFIP2	0.630463	7.12709e-23	2.43018e-21	up
TES	-0.921302	8.40535e-23	2.84617e-21	down
CLDN3	1.33102	8.50219e-23	2.87397e-21	up
FXYD6	-1.30193	9.01454e-23	3.03666e-21	down
REPIN1	0.596495	9.20035e-23	3.09391e-21	up
LY6G6D	-0.658654	1.04842e-22	3.51959e-21	down
WIF1	-1.56703	1.1714e-22	3.92568e-21	down
GPR161	-0.840121	1.3909e-22	4.63743e-21	down
SLC43A1	1.50797	1.42465e-22	4.74188e-21	up
ACSF2	-1.0903	1.57495e-22	5.21547e-21	down
SVIL	-1.25503	1.62678e-22	5.37801e-21	down
DBNDD2	-0.59594	1.68165e-22	5.55001e-21	down
PEAK1	-0.659893	1.695e-22	5.57727e-21	down
IMPDH2	0.889886	1.69562e-22	5.57727e-21	up
KIT	-0.958532	1.73546e-22	5.69871e-21	down
PLPPR2	0.692987	1.81667e-22	5.94541e-21	up
CBX7	-0.779241	1.89281e-22	6.1739e-21	down
POPDC2	-1.23855	2.006e-22	6.53219e-21	down
DNAJB4	-1.04309	2.03594e-22	6.61868e-21	down
RRP9	0.607156	2.20683e-22	7.13859e-21	up
SH3PXD2B	-0.881926	2.24241e-22	7.24169e-21	down
MFSD12	0.716922	2.40763e-22	7.72419e-21	up
ALAD	-0.866735	2.4442e-22	7.82866e-21	down
SFXN4	0.710638	2.56703e-22	8.20365e-21	up
GPM6B	-0.926951	2.56968e-22	8.20365e-21	down
KLHL13	-0.612449	2.69445e-22	8.57397e-21	down
RASL12	-1.53242	2.79838e-22	8.86139e-21	down
TINAGL1	-1.14872	3.15191e-22	9.94862e-21	down
RHOBTB2	-0.635365	3.16405e-22	9.97084e-21	down
FAM162B	-0.773589	3.37848e-22	1.06123e-20	down
PRNP	-0.829093	3.47647e-22	1.08851e-20	down
MSRB3	-1.42863	3.61978e-22	1.13157e-20	down
NDP	-1.09367	3.68734e-22	1.15085e-20	down
KRT18	0.849533	3.8362e-22	1.1954e-20	up
SLC16A4	-0.612201	3.89288e-22	1.21113e-20	down
SLC12A8	0.733748	3.91287e-22	1.21542e-20	up
PDGFD	-0.981883	3.9911e-22	1.23775e-20	down
MEIS2	-1.13236	4.01822e-22	1.24418e-20	down
TBC1D1	-0.842994	4.06507e-22	1.2567e-20	down
MXRA7	-1.16578	4.27397e-22	1.31297e-20	down
HOXC4	1.14686	4.32726e-22	1.32725e-20	up
PHLDB3	0.704802	4.39936e-22	1.34514e-20	up
METTL7A	-1.11072	4.46234e-22	1.36227e-20	down
FOLH1	2.21543	4.78075e-22	1.45266e-20	up
CRYZ	-0.782005	5.10515e-22	1.54164e-20	down
NOP16	0.706606	5.1443e-22	1.55107e-20	up
KCNMB1	-1.43042	5.23554e-22	1.57615e-20	down
PALLD	-1.38166	5.28806e-22	1.58951e-20	down
FAM167A	-0.892095	5.31744e-22	1.59588e-20	down
CERK	-0.914988	5.48403e-22	1.64336e-20	down
TMEM238	1.27648	5.63795e-22	1.68689e-20	up
SPATA18	-0.853224	5.80934e-22	1.73287e-20	down
GNB2	0.673045	6.05298e-22	1.80005e-20	up
ATP2B4	-1.3913	6.24581e-22	1.85175e-20	down
TP53INP1	1.07201	7.81553e-22	2.29969e-20	up
RABEP2	0.944114	7.92709e-22	2.32901e-20	up
INAVA	-0.856067	8.00237e-22	2.3476e-20	down
TIMM13	0.773391	8.17436e-22	2.39088e-20	up
TRPC1	-0.643062	8.31756e-22	2.42912e-20	down
GGCT	0.974944	8.61617e-22	2.50883e-20	up
ATP6V1G1	0.720915	9.05141e-22	2.62383e-20	up
PAQR7	-0.822103	9.14883e-22	2.64815e-20	down
ABCC4	1.76107	9.38878e-22	2.70957e-20	up
DUOX2	-0.870665	9.45665e-22	2.72513e-20	down
IP6K3	-0.940007	9.66058e-22	2.7798e-20	down
SLC25A45	0.66297	1.04078e-21	2.98601e-20	up
SYNPO2	-1.87243	1.06869e-21	3.05555e-20	down
CLIP3	-1.25938	1.13168e-21	3.22313e-20	down
MBNL2	-1.04508	1.21593e-21	3.45806e-20	down
EFEMP1	-1.38216	1.23175e-21	3.49795e-20	down
ROR2	-1.1884	1.3607e-21	3.84738e-20	down
MYOF	-1.37201	1.39528e-21	3.93945e-20	down
NECAB3	0.773405	1.41083e-21	3.97759e-20	up
KCNMA1	-1.10764	1.5167e-21	4.23984e-20	down
CYBC1	0.591052	1.51988e-21	4.24221e-20	up
ASPH	-0.839061	1.56789e-21	4.36997e-20	down
BNIPL	-1.1163	1.66803e-21	4.63585e-20	down
PRRG4	-1.00827	1.6711e-21	4.63777e-20	down
RBBP8	-0.601077	1.68515e-21	4.67013e-20	down
RGN	-0.93618	1.81431e-21	5.00678e-20	down
CHST2	-1.10922	1.92112e-21	5.29405e-20	down
PDLIM5	1.7059	1.96442e-21	5.40574e-20	up
SNAI2	-1.46338	1.97156e-21	5.41778e-20	down
MRPL17	0.730447	2.0144e-21	5.52771e-20	up
UCN	0.973514	2.1468e-21	5.86632e-20	up
PGM5	-1.87131	2.15784e-21	5.88279e-20	down
DZIP1	-0.634294	2.21175e-21	6.01018e-20	down
ATP1A2	-1.61448	2.39798e-21	6.48018e-20	down
SERPINB5	-1.38008	2.40651e-21	6.49425e-20	down
DUSP3	-0.669904	2.4335e-21	6.55804e-20	down
PCED1A	0.786174	2.65773e-21	7.15244e-20	up
PRTFDC1	-0.716941	2.76814e-21	7.43932e-20	down
BEND5	-0.711219	2.82007e-21	7.56848e-20	down
VCL	-1.28111	2.90769e-21	7.78226e-20	down
MLPH	0.954675	3.12196e-21	8.32986e-20	up
ITGB8	-0.888745	3.12508e-21	8.32986e-20	down
ASB2	-1.16418	3.22047e-21	8.57241e-20	down
C2orf72	1.8104	3.256e-21	8.65521e-20	up
TRIB3	0.872038	3.55762e-21	9.41942e-20	up
CTU1	0.651406	3.55795e-21	9.41942e-20	up
STEAP1	1.2896	4.02496e-21	1.06399e-19	up
FGF7	-0.963378	4.02984e-21	1.06399e-19	down
ITGA2	-1.0377	4.08479e-21	1.07704e-19	down
ANXA6	-1.16773	4.16559e-21	1.09686e-19	down
DNPH1	0.823869	4.2381e-21	1.11445e-19	up
CA12	-0.920235	4.34206e-21	1.13873e-19	down
TMEM161A	0.602822	4.38119e-21	1.14745e-19	up
LRCH2	-0.949264	4.38798e-21	1.14769e-19	down
ACACB	-0.680808	4.48783e-21	1.17176e-19	down
TXN	0.757658	4.56911e-21	1.19028e-19	up
SCARA5	-0.746037	4.67263e-21	1.21563e-19	down
DDO	-0.599174	4.90571e-21	1.27288e-19	down
RARB	-0.754423	5.03091e-21	1.30363e-19	down
ACSL4	-0.922322	5.36256e-21	1.3859e-19	down
TRO	-0.585519	5.79198e-21	1.49292e-19	down
PDIA5	0.88729	5.82275e-21	1.49739e-19	up
PTP4A3	1.47766	5.82463e-21	1.49739e-19	up
RPL22L1	1.15033	5.85939e-21	1.50237e-19	up
LRRC45	0.750804	5.90763e-21	1.51276e-19	up
RUVBL1	0.604009	6.02367e-21	1.54045e-19	up
ATRNL1	-0.605037	6.08477e-21	1.55404e-19	down
TENT5B	-1.3256	6.15833e-21	1.57078e-19	down
BNIP3L	-0.714617	6.32911e-21	1.60804e-19	down
TAF1D	0.669572	6.54726e-21	1.65915e-19	up
NCS1	-1.01106	6.64274e-21	1.68116e-19	down
CDC42EP3	-1.00894	6.78549e-21	1.71507e-19	down
GDF15	1.93471	7.16052e-21	1.80054e-19	up
PIK3R1	-0.914873	7.20608e-21	1.80967e-19	down
SLC44A4	0.98322	7.57616e-21	1.89288e-19	up
HACD1	-0.767658	7.68172e-21	1.9168e-19	down
BAIAP2L1	0.772698	8.54883e-21	2.11963e-19	up
MRAP2	-0.884687	8.6108e-21	2.13229e-19	down
PAICS	0.689383	9.302e-21	2.29473e-19	up
SLC51B	-0.665964	9.37564e-21	2.30998e-19	down
FOXQ1	-1.31408	9.5348e-21	2.34573e-19	down
PAEP	-1.25848	9.55523e-21	2.34573e-19	down
CEND1	-0.847533	9.69832e-21	2.37451e-19	down
PPP1R12A	-0.738109	1.03472e-20	2.52705e-19	down
NRK	-0.613909	1.11061e-20	2.70901e-19	down
ATAD3C	-0.670884	1.13939e-20	2.77228e-19	down
NUDT10	-1.27563	1.17602e-20	2.85785e-19	down
DIXDC1	-0.897064	1.25825e-20	3.04631e-19	down
HGH1	0.686404	1.26594e-20	3.06112e-19	up
SHISAL1	-0.791802	1.35513e-20	3.26871e-19	down
SCGB3A1	-1.9298	1.43087e-20	3.44714e-19	down
PLS3	-1.00232	1.43377e-20	3.44986e-19	down
TCEAL2	-1.46205	1.48444e-20	3.5674e-19	down
C1QTNF1	-1.22323	1.51658e-20	3.64017e-19	down
ITIH5	-0.962435	1.52427e-20	3.65414e-19	down
PDK4	-1.92491	1.54409e-20	3.69711e-19	down
TWNK	0.631863	1.58251e-20	3.77984e-19	up
TOR1AIP1	-0.641935	1.68725e-20	4.01528e-19	down
NRXN3	-0.604061	1.73616e-20	4.12666e-19	down
FBLIM1	-0.757242	1.75983e-20	4.17782e-19	down
EDN3	-0.930249	1.88631e-20	4.46184e-19	down
SP6	-0.768532	1.99628e-20	4.71623e-19	down
FHOD3	-0.992795	2.03659e-20	4.80567e-19	down
ILK	-0.822648	2.05343e-20	4.83374e-19	down
GJA1	-1.39969	2.07026e-20	4.86747e-19	down
KPNA3	-0.68997	2.08964e-20	4.90713e-19	down
KLK2	1.67996	2.21495e-20	5.18893e-19	up
FAM124A	-0.644506	2.28644e-20	5.35e-19	down
PRIMA1	-0.935484	2.29447e-20	5.36237e-19	down
AIFM2	-0.604535	2.29804e-20	5.3643e-19	down
GNAI2	-0.613834	2.40752e-20	5.61313e-19	down
ADM2	1.0746	2.468e-20	5.74729e-19	up
PMEPA1	1.06312	2.50562e-20	5.82795e-19	up
CAVIN2	-1.29298	2.53137e-20	5.8669e-19	down
SHMT2	0.719754	2.58089e-20	5.97457e-19	up
APOBEC3D	-0.643851	2.67124e-20	6.1691e-19	down
PBX1	-0.789785	2.74193e-20	6.3222e-19	down
ANKZF1	0.670763	2.91009e-20	6.6891e-19	up
CALD1	-1.21658	2.95443e-20	6.78303e-19	down
LRRC17	-0.622195	3.13893e-20	7.19818e-19	down
TIMP3	-0.887688	3.17595e-20	7.26601e-19	down
SORBS1	-1.54689	3.20899e-20	7.32445e-19	down
KCNS1	-0.617179	3.24996e-20	7.40066e-19	down
CRABP2	-1.82438	3.3984e-20	7.7207e-19	down
ADRB1	1.16861	3.40687e-20	7.73095e-19	up
SPON1	-1.31782	3.46234e-20	7.84769e-19	down
P4HB	0.709625	3.56712e-20	8.07584e-19	up
ERBB3	0.812781	3.81988e-20	8.59824e-19	up
TMTC4	0.898508	3.9019e-20	8.76268e-19	up
NPR2	-0.807816	3.93471e-20	8.82623e-19	down
KANK1	-0.815932	3.95127e-20	8.85319e-19	down
VAV3	-0.68283	4.03499e-20	9.03044e-19	down
KIAA1210	-1.15888	4.06885e-20	9.07929e-19	down
EEF2	0.628205	4.07077e-20	9.07929e-19	up
ITGB6	-1.05666	4.14473e-20	9.2232e-19	down
CORO1C	-0.82319	4.24035e-20	9.41455e-19	down
DTNA	-0.793432	4.24665e-20	9.41784e-19	down
TMEM40	-0.638833	4.32195e-20	9.57395e-19	down
RRAS	-1.01951	4.4246e-20	9.77917e-19	down
ADCY5	-1.07631	4.45818e-20	9.83114e-19	down
PYCR3	0.797699	4.61525e-20	1.01546e-18	up
CORO1B	0.721106	4.89306e-20	1.07537e-18	up
GPRASP1	-0.944855	4.94727e-20	1.08397e-18	down
SPATA6	-0.666968	4.95221e-20	1.08397e-18	down
RRP1	0.628079	5.09031e-20	1.11247e-18	up
PATE4	-1.14354	5.24698e-20	1.14415e-18	down
SYNM	-1.81262	5.33196e-20	1.16138e-18	down
TTYH3	0.852488	5.35144e-20	1.16433e-18	up
RASL10B	-0.776278	5.42859e-20	1.1798e-18	down
SMOC1	-1.62056	5.43971e-20	1.18025e-18	down
NLGN3	-0.908991	5.68532e-20	1.23012e-18	down
KANK2	-1.12961	5.82335e-20	1.25859e-18	down
SMIM10	-1.01974	5.83759e-20	1.26027e-18	down
RAB3D	0.804818	5.96779e-20	1.28413e-18	up
SSPN	-0.908508	6.1853e-20	1.328e-18	down
CHTF18	0.743673	6.19483e-20	1.32859e-18	up
CAND2	-0.633462	6.23418e-20	1.33556e-18	down
HMG20B	0.843406	6.25077e-20	1.33765e-18	up
CD200	-0.984969	6.4424e-20	1.37565e-18	down
ZBTB7C	-0.71834	6.61903e-20	1.40874e-18	down
TTC28	-0.631397	6.76611e-20	1.43535e-18	down
FAM13B	-0.679192	7.10616e-20	1.50586e-18	down
KLHL17	0.664954	7.16437e-20	1.51655e-18	up
PKN1	0.775427	7.19527e-20	1.52144e-18	up
CENPX	0.907351	7.46068e-20	1.57586e-18	up
CPED1	-1.17285	7.6627e-20	1.61503e-18	down
KCNJ8	-1.02493	7.78472e-20	1.63898e-18	down
CBX4	0.744428	8.52159e-20	1.78834e-18	up
KRT23	-1.71341	8.67986e-20	1.81765e-18	down
MFSD3	0.952468	8.76456e-20	1.83343e-18	up
LRP4	-0.607074	8.78148e-20	1.835e-18	down
ASPHD1	0.975232	8.92901e-20	1.86383e-18	up
TPD52	0.907341	8.94411e-20	1.86499e-18	up
PSIP1	-0.617938	9.89877e-20	2.05092e-18	down
PRKCA	-0.934808	1.01771e-19	2.10635e-18	down
TRAF3IP2	-0.753012	1.02558e-19	2.12041e-18	down
PATE1	-1.46561	1.02929e-19	2.12581e-18	down
DSTN	-0.6144	1.0476e-19	2.16134e-18	down
CPAMD8	-1.18758	1.14213e-19	2.35142e-18	down
FOXI1	-1.06399	1.21102e-19	2.48801e-18	down
TNS1	-1.50074	1.22384e-19	2.51171e-18	down
NR2F6	0.605094	1.2607e-19	2.58192e-18	up
APOC1	1.70368	1.32425e-19	2.70924e-18	up
LENG9	1.01243	1.40593e-19	2.87032e-18	up
NKX3-1	1.30829	1.41453e-19	2.88488e-18	up
MTARC1	0.85712	1.4416e-19	2.93701e-18	up
GLI3	-0.674221	1.49812e-19	3.0458e-18	down
FASN	1.43738	1.53231e-19	3.10564e-18	up
OGFRL1	-0.611521	1.67934e-19	3.37561e-18	down
TMEM268	0.623827	1.72845e-19	3.46719e-18	up
SMCO4	0.743724	1.77173e-19	3.54673e-18	up
DAB2IP	-0.761792	1.91319e-19	3.82207e-18	down
GMDS	1.01517	2.05457e-19	4.09615e-18	up
TMSB15A	1.6935	2.11397e-19	4.21028e-18	up
EOGT	-0.694482	2.12899e-19	4.23587e-18	down
CALR	0.590888	2.16196e-19	4.29708e-18	up
CHST3	-0.915455	2.23084e-19	4.4205e-18	down
SMIM10L2B	-0.749214	2.39712e-19	4.72602e-18	down
PITPNM3	-0.620839	2.45266e-19	4.83066e-18	down
IRF7	0.932528	2.64821e-19	5.19484e-18	up
TBL1X	-0.63339	2.66833e-19	5.22907e-18	down
RBM38	-0.862691	2.69974e-19	5.28004e-18	down
ATAD3A	0.635349	2.74539e-19	5.36395e-18	up
DEFB131A	-0.692447	2.81459e-19	5.48816e-18	down
LMOD1	-1.697	2.85841e-19	5.56806e-18	down
RGL2	0.757293	2.95242e-19	5.73974e-18	up
FBXO32	-0.900535	2.96973e-19	5.76766e-18	down
HOXB2	-0.920048	3.02011e-19	5.85967e-18	down
SYNC	-0.677062	3.09383e-19	5.98541e-18	down
TACC1	-0.999535	3.09411e-19	5.98541e-18	down
CAPG	-1.26448	3.23589e-19	6.24911e-18	down
CCSER2	-0.59936	3.23682e-19	6.24911e-18	down
SLC2A5	-1.392	3.43819e-19	6.61826e-18	down
PPP1R12B	-1.21513	3.51521e-19	6.73995e-18	down
IGSF8	0.606486	3.5244e-19	6.75095e-18	up
TARBP1	0.804055	3.62831e-19	6.93639e-18	up
ANKRD65	-0.948339	3.77455e-19	7.20892e-18	down
SPOCK3	-1.46476	3.9382e-19	7.49216e-18	down
PNKP	0.646735	3.94959e-19	7.50653e-18	up
SPINK2	-1.43739	4.00583e-19	7.60602e-18	down
PRSS8	1.0005	4.09513e-19	7.75297e-18	up
QSOX1	-0.975876	4.19824e-19	7.92814e-18	down
TMEM200B	-1.12469	4.19983e-19	7.92814e-18	down
WSCD2	-0.754812	4.42604e-19	8.34711e-18	down
FBXL7	-0.644271	4.62966e-19	8.71429e-18	down
CANT1	0.747523	4.63856e-19	8.72264e-18	up
CCND2	-1.14941	4.78416e-19	8.97053e-18	down
B4GALNT4	1.28381	4.99142e-19	9.35018e-18	up
MAP3K20	-1.02216	5.05343e-19	9.45727e-18	down
STK32C	0.611599	5.07528e-19	9.48907e-18	up
AVPI1	-1.03229	5.10496e-19	9.53545e-18	down
ITGB1BP2	-0.676551	5.32328e-19	9.90535e-18	down
RIPK2	0.742929	5.72984e-19	1.06416e-17	up
STARD8	-0.785676	5.95916e-19	1.1036e-17	down
PDK2	-0.61324	6.38015e-19	1.17711e-17	down
EDDM3A	-0.946456	6.73245e-19	1.23859e-17	down
TBX4	-1.15389	6.82302e-19	1.25407e-17	down
TGM1	-0.592827	6.83366e-19	1.25485e-17	down
DYNC1I1	-0.716628	7.15553e-19	1.30903e-17	down
TM7SF2	0.974779	7.64758e-19	1.39383e-17	up
SOX12	0.63649	7.9738e-19	1.45193e-17	up
LSR	0.596925	8.2457e-19	1.49725e-17	up
ARMCX1	-1.39809	8.39595e-19	1.52312e-17	down
STAC2	-1.26141	8.66883e-19	1.57116e-17	down
WFDC2	-2.16627	8.91631e-19	1.61303e-17	down
CD40	-1.04231	9.25062e-19	1.67196e-17	down
FAM110C	-1.06771	9.45901e-19	1.70647e-17	down
HLF	-0.910294	9.71839e-19	1.75003e-17	down
CLIC6	-1.01915	9.75951e-19	1.75581e-17	down
QTRT1	0.768562	9.80154e-19	1.76175e-17	up
PRDM8	-1.53789	9.94297e-19	1.78553e-17	down
FAAH	0.9651	9.98041e-19	1.79061e-17	up
LMO4	-0.735654	1.04824e-18	1.87207e-17	down
CLDN2	-1.06584	1.07901e-18	1.92526e-17	down
TCN2	-0.806076	1.08104e-18	1.92713e-17	down
DAB1	-0.731469	1.08743e-18	1.93499e-17	down
PARM1	-1.1971	1.11154e-18	1.9761e-17	down
FGF2	-0.781779	1.11742e-18	1.98474e-17	down
NKX2-3	0.792791	1.12694e-18	1.99983e-17	up
CSKMT	0.589426	1.16393e-18	2.058e-17	up
SOX4	0.892066	1.19439e-18	2.10995e-17	up
POU3F3	-0.72919	1.22254e-18	2.15578e-17	down
RPL36	0.898616	1.24718e-18	2.19724e-17	up
MRPL41	1.0447	1.27831e-18	2.25006e-17	up
PTPN14	-0.657397	1.28375e-18	2.25759e-17	down
DPYSL3	-1.1357	1.3012e-18	2.28417e-17	down
ZNF350	0.841019	1.3589e-18	2.38119e-17	up
RASL11B	-0.828539	1.55536e-18	2.70602e-17	down
RTL5	-0.627427	1.66446e-18	2.88811e-17	down
YAP1	-0.837088	1.69615e-18	2.93789e-17	down
GJC1	-0.703709	1.79384e-18	3.1016e-17	down
TSHZ3	-0.810234	1.81995e-18	3.14395e-17	down
DGKD	0.676749	1.91324e-18	3.29638e-17	up
TLR3	-0.714143	1.99566e-18	3.43536e-17	down
DNAH5	1.08381	2.01366e-18	3.46328e-17	up
SGCE	-0.939479	2.04744e-18	3.51828e-17	down
LAMB3	-1.8524	2.14188e-18	3.66124e-17	down
BAIAP3	0.845551	2.16005e-18	3.68909e-17	up
TRIB1	1.45903	2.19967e-18	3.75347e-17	up
SEMG2	-2.74157	2.21002e-18	3.76784e-17	down
TTC6	0.789674	2.22946e-18	3.79767e-17	up
HSPD1	0.673831	2.25752e-18	3.84211e-17	up
SPART	-1.02008	2.30428e-18	3.91488e-17	down
NNT	-0.751031	2.33553e-18	3.96452e-17	down
FAM111A	0.81183	2.35596e-18	3.99572e-17	up
GSC	0.720147	2.36244e-18	4.00324e-17	up
FHL1	-1.64688	2.50212e-18	4.22893e-17	down
HEBP2	0.665619	2.53949e-18	4.28468e-17	up
MPC2	0.908415	2.58446e-18	4.35303e-17	up
PRAC2	1.17614	2.59745e-18	4.37115e-17	up
PARP3	-0.713107	2.68222e-18	4.50991e-17	down
MPZL2	-0.952954	2.69344e-18	4.52489e-17	down
RRS1	0.719326	2.74441e-18	4.60655e-17	up
GATA5	-0.85814	2.75675e-18	4.62329e-17	down
RPS6KA4	0.608687	2.86944e-18	4.80404e-17	up
ITGA9	-0.961202	2.90842e-18	4.86513e-17	down
LIX1	-0.587211	2.92179e-18	4.87914e-17	down
ANXA2	-1.09469	3.08079e-18	5.13587e-17	down
BCAM	1.01567	3.09754e-18	5.1594e-17	up
QPCTL	0.589745	3.10122e-18	5.16113e-17	up
CRISP1	-0.807528	3.20446e-18	5.3284e-17	down
ADRA1D	-0.87735	3.2881e-18	5.46283e-17	down
ZNF750	-1.11114	3.43623e-18	5.68959e-17	down
HOXB8	-0.83992	3.47903e-18	5.75556e-17	down
PDPN	-0.944406	3.56318e-18	5.88482e-17	down
NPTN	-0.666306	3.61952e-18	5.97283e-17	down
PCSK6	0.694757	3.87063e-18	6.36033e-17	up
TSPAN13	0.927748	4.00189e-18	6.57049e-17	up
CRACR2B	1.245	4.24953e-18	6.95955e-17	up
NFKB2	0.687164	4.36267e-18	7.13288e-17	up
APBB1	-0.728416	4.37808e-18	7.15209e-17	down
TSPAN2	-0.990087	4.44711e-18	7.25879e-17	down
NEXN	-1.30296	4.61659e-18	7.51031e-17	down
NACC2	-0.693209	4.71402e-18	7.65607e-17	down
TELO2	0.635131	4.80921e-18	7.80418e-17	up
EDNRA	-1.18154	4.93465e-18	8.0011e-17	down
TEAD1	-0.844082	5.01015e-18	8.10607e-17	down
SAC3D1	0.72456	5.01184e-18	8.10607e-17	up
MAML2	-0.858411	5.13072e-18	8.29149e-17	down
PDE4A	-0.698554	5.17284e-18	8.35264e-17	down
MYH11	-1.92876	5.49353e-18	8.85582e-17	down
SOWAHA	-0.752586	5.52046e-18	8.89189e-17	down
DPT	-1.71882	5.8268e-18	9.36217e-17	down
PDGFC	-0.9327	5.83797e-18	9.36471e-17	down
SNPH	-0.795776	6.03984e-18	9.68059e-17	down
RTN4RL2	0.616675	6.09018e-18	9.74528e-17	up
GRXCR1	-0.596251	6.55575e-18	1.04646e-16	down
CLIC4	-0.983694	6.58482e-18	1.04938e-16	down
C14orf132	-0.814614	6.72403e-18	1.06982e-16	down
FAM221A	0.59784	6.90898e-18	1.09835e-16	up
SLC25A39	0.670996	6.98731e-18	1.109e-16	up
METTL26	0.866818	7.08259e-18	1.12321e-16	up
BICD1	0.935678	7.11077e-18	1.12677e-16	up
SCRG1	-0.600273	7.16214e-18	1.13215e-16	down
SLC24A3	-0.98579	7.2148e-18	1.13863e-16	down
TMEM51	-0.701432	7.43071e-18	1.17082e-16	down
HMGB3	0.631633	7.57624e-18	1.19182e-16	up
BBX	-0.741223	7.85004e-18	1.23291e-16	down
SCRIB	0.676961	7.94715e-18	1.24716e-16	up
SEC61G	0.682269	8.18582e-18	1.2805e-16	up
EPHA2	-1.18102	8.33843e-18	1.30333e-16	down
EMILIN3	-0.745019	8.41916e-18	1.3149e-16	down
HOXD11	-0.757045	8.62805e-18	1.34644e-16	down
NR3C1	-0.814956	9.32394e-18	1.45272e-16	down
EFEMP2	-1.02041	9.34974e-18	1.45558e-16	down
TCEAL7	-0.904154	9.88504e-18	1.53647e-16	down
RBPMS	-1.04213	1.02622e-17	1.59003e-16	down
PHYHIP	-0.829742	1.03009e-17	1.59476e-16	down
C1orf116	0.970072	1.05739e-17	1.63574e-16	up
MDFIC	-0.720793	1.09984e-17	1.6987e-16	down
LPCAT1	0.619862	1.16373e-17	1.79172e-16	up
DKK3	-1.20309	1.20716e-17	1.85567e-16	down
TMEM114	-0.792493	1.22846e-17	1.88692e-16	down
RPL39	0.833259	1.2777e-17	1.95794e-16	up
CHST11	-0.704133	1.28677e-17	1.96875e-16	down
ZNF692	0.912629	1.30003e-17	1.98749e-16	up
FBXL22	-0.635024	1.38038e-17	2.10537e-16	down
ADGRG6	-0.844714	1.41875e-17	2.16052e-16	down
SEPTIN10	-0.680806	1.44493e-17	2.19696e-16	down
IRX2	0.758852	1.46959e-17	2.23099e-16	up
TUBA4A	-1.02102	1.49882e-17	2.27007e-16	down
LPP	-0.847329	1.54449e-17	2.33562e-16	down
JPH2	-1.26152	1.56692e-17	2.3677e-16	down
SOX7	-0.767601	1.57929e-17	2.38456e-16	down
SHC2	0.94144	1.60487e-17	2.4213e-16	up
RASSF5	-0.787786	1.62655e-17	2.45212e-16	down
HES4	1.31633	1.63785e-17	2.46726e-16	up
C1QL1	-0.816821	1.73762e-17	2.6095e-16	down
S100A16	-1.20798	1.79706e-17	2.69463e-16	down
SNRNP70	0.846174	1.82255e-17	2.73075e-16	up
ZP3	0.925973	1.8482e-17	2.76493e-16	up
HEPH	-0.925428	1.9281e-17	2.88006e-16	down
RND3	-1.2151	1.97854e-17	2.95314e-16	down
PRR7	0.842448	1.98528e-17	2.96095e-16	up
TRPC4	-0.666361	2.01142e-17	2.99765e-16	down
TMEM47	-1.00115	2.0714e-17	3.07999e-16	down
MSLN	-1.2215	2.13751e-17	3.16864e-16	down
OR51E2	2.75758	2.17384e-17	3.21762e-16	up
PAQR6	1.3052	2.19068e-17	3.23519e-16	up
HSD17B13	-1.47843	2.23823e-17	3.30291e-16	down
GSTM2	-0.845623	2.2787e-17	3.35756e-16	down
NEK5	0.710841	2.39373e-17	3.52439e-16	up
BEND4	1.24389	2.45302e-17	3.60626e-16	up
IRAG1	-1.21486	2.57337e-17	3.78034e-16	down
TSPAN1	1.30152	2.60976e-17	3.83091e-16	up
EPB41L3	-0.670105	2.7464e-17	4.02847e-16	down
FBXW9	0.618608	2.78493e-17	4.08192e-16	up
C11orf80	0.621568	2.89391e-17	4.23848e-16	up
PLCD3	-0.730336	2.96879e-17	4.34163e-16	down
YBEY	0.680068	3.07908e-17	4.49955e-16	up
RERG	-0.773568	3.08998e-17	4.5121e-16	down
NETO2	0.783507	3.1132e-17	4.54262e-16	up
APOE	1.55466	3.22945e-17	4.70522e-16	up
B3GAT3	0.630435	3.23718e-17	4.71296e-16	up
CAMK1D	-0.761329	3.39611e-17	4.93699e-16	down
VIT	-0.626827	3.49278e-17	5.07375e-16	down
OXR1	-0.669193	3.49573e-17	5.07427e-16	down
FAM222A	1.00385	3.69945e-17	5.35803e-16	up
RPL7A	0.661662	3.78782e-17	5.4779e-16	up
ZNF219	-0.698021	3.98281e-17	5.75563e-16	down
HAAO	-0.924725	4.00759e-17	5.78499e-16	down
EFS	-1.29573	4.07072e-17	5.86099e-16	down
CD59	-0.588566	4.10196e-17	5.89728e-16	down
GPX8	-0.83903	4.16253e-17	5.97996e-16	down
PPP1R1A	-0.751092	4.47479e-17	6.4202e-16	down
DDR2	-0.967102	4.47554e-17	6.4202e-16	down
ATP1B1	-1.13251	4.51165e-17	6.46724e-16	down
EHD2	-1.12081	4.6537e-17	6.66109e-16	down
CTSB	-0.842334	4.66688e-17	6.67507e-16	down
ECI2	0.666588	4.78631e-17	6.81099e-16	up
TRIM29	-1.64468	4.87813e-17	6.93155e-16	down
COLEC12	1.09206	4.88829e-17	6.94095e-16	up
MANEAL	0.804768	4.92392e-17	6.98139e-16	up
GLYATL1	1.62627	4.98307e-17	7.04991e-16	up
GPX3	-1.38385	5.04117e-17	7.12695e-16	down
APOBEC3F	-0.723718	5.19084e-17	7.33323e-16	down
PLEKHJ1	0.598931	5.47562e-17	7.7188e-16	up
BCL2	-0.893984	5.52868e-17	7.78798e-16	down
PLSCR4	-0.779494	5.66735e-17	7.97757e-16	down
FFAR2	1.28609	5.72643e-17	8.05493e-16	up
SLC13A2	-0.72195	5.84319e-17	8.20736e-16	down
GNG11	-0.843338	6.00115e-17	8.42316e-16	down
SLC25A6	0.694135	6.05797e-17	8.49391e-16	up
CELSR2	-0.664896	6.06025e-17	8.49391e-16	down
DIPK1B	0.683489	6.82996e-17	9.55217e-16	up
REEP1	-0.748114	7.02056e-17	9.80469e-16	down
PEX6	0.602833	7.05403e-17	9.83737e-16	up
ITM2B	-0.595147	7.07879e-17	9.86486e-16	down
SPRY2	-0.71239	7.88164e-17	1.09447e-15	down
RCAN2	-1.04285	8.52323e-17	1.1802e-15	down
APOF	1.39653	8.60243e-17	1.19033e-15	up
SLC25A37	0.697299	8.734e-17	1.20682e-15	up
SLC37A1	0.840669	8.86318e-17	1.22381e-15	up
RPS15	0.848093	8.90989e-17	1.22852e-15	up
MLC1	-0.674551	9.09881e-17	1.25192e-15	down
INKA1	-0.886658	9.61545e-17	1.31836e-15	down
ARHGAP10	-0.612539	9.6428e-17	1.32118e-15	down
SMKR1	0.865724	9.69223e-17	1.32703e-15	up
RBPMS2	-0.968	1.03154e-16	1.41137e-15	down
SEMA5A	-0.708234	1.08265e-16	1.47922e-15	down
AMOT	-0.966375	1.19447e-16	1.62744e-15	down
CAVIN1	-1.1385	1.2347e-16	1.68109e-15	down
DGLUCY	-0.839077	1.24107e-16	1.68858e-15	down
GJB1	1.38386	1.24265e-16	1.68955e-15	up
AOPEP	-0.639063	1.28111e-16	1.73701e-15	down
EDNRB	-1.14687	1.35644e-16	1.83787e-15	down
GAS1	-1.14919	1.36786e-16	1.85206e-15	down
SGSM3	0.607143	1.37783e-16	1.86427e-15	up
UCK2	0.648767	1.39714e-16	1.88648e-15	up
S100A6	-1.31244	1.40107e-16	1.88918e-15	down
NRP2	-0.778826	1.4198e-16	1.9131e-15	down
IDUA	0.730838	1.43708e-16	1.93506e-15	up
GGT6	-1.14194	1.46363e-16	1.96674e-15	down
IL6ST	-0.78483	1.55847e-16	2.08988e-15	down
CENPM	0.88959	1.66727e-16	2.2327e-15	up
RHOB	-1.12433	1.69602e-16	2.26809e-15	down
GALNT7	1.1399	1.69808e-16	2.26929e-15	up
PDLIM1	-1.02274	1.72487e-16	2.30194e-15	down
TRIP6	-0.95654	1.74781e-16	2.32938e-15	down
COL23A1	-0.73728	1.80356e-16	2.40041e-15	down
FLNC	-1.69615	1.81516e-16	2.4142e-15	down
MASP1	-1.18548	1.82275e-16	2.42265e-15	down
PNPLA7	0.800873	1.91178e-16	2.53065e-15	up
HCAR2	-0.731725	1.92941e-16	2.55225e-15	down
TGFB1I1	-1.15137	2.00064e-16	2.64469e-15	down
ID3	-1.28188	2.00666e-16	2.65085e-15	down
ISYNA1	-0.964631	2.05996e-16	2.71943e-15	down
ARHGEF25	-0.978932	2.07245e-16	2.73406e-15	down
FOXO1	-0.629	2.15128e-16	2.83423e-15	down
KLK4	1.40578	2.16637e-16	2.8522e-15	up
SLC25A42	0.668687	2.27924e-16	2.99877e-15	up
RACK1	0.594178	2.28077e-16	2.99877e-15	up
TGM3	1.44769	2.52882e-16	3.30932e-15	up
ENO2	-0.767492	2.56785e-16	3.35366e-15	down
GAL	1.08397	2.62425e-16	3.42498e-15	up
DMKN	-0.861557	2.62634e-16	3.42498e-15	down
KCTD9	-0.622836	2.62773e-16	3.42498e-15	down
RBMS1	-0.622631	2.68936e-16	3.50298e-15	down
SS18L2	0.812245	2.69308e-16	3.50549e-15	up
ITGA3	-0.813456	2.77398e-16	3.6012e-15	down
MYL5	0.737436	2.82994e-16	3.66897e-15	up
H4C9	0.895487	2.87832e-16	3.72675e-15	up
ROBO1	-0.912962	2.96708e-16	3.83659e-15	down
ACSM1	2.23049	2.98346e-16	3.85522e-15	up
TNS4	-1.63001	3.11335e-16	4.0204e-15	down
TMOD1	-0.725691	3.36786e-16	4.34045e-15	down
VTCN1	-1.01544	3.37153e-16	4.34232e-15	down
PALM3	-0.859623	3.5637e-16	4.58378e-15	down
UAP1	0.841685	3.62157e-16	4.65515e-15	up
MAZ	0.71201	3.7761e-16	4.83786e-15	up
FLRT3	-1.24101	3.84559e-16	4.92367e-15	down
C9orf152	0.881377	3.95274e-16	5.05423e-15	up
RAB3B	1.16596	4.02439e-16	5.13576e-15	up
SPEG	-0.761096	4.04545e-16	5.15926e-15	down
GCNT1	1.42507	4.11627e-16	5.24275e-15	up
HSH2D	0.792913	4.20283e-16	5.3443e-15	up
CDK18	-0.654732	4.20421e-16	5.3443e-15	down
PPIB	0.622707	4.22261e-16	5.3642e-15	up
WFDC1	-1.06066	4.48775e-16	5.68992e-15	down
ZNF30	0.78912	4.59674e-16	5.82055e-15	up
KLHL5	-0.803175	5.17022e-16	6.51294e-15	down
ANO4	-0.758996	5.26118e-16	6.61048e-15	down
PNMA1	-0.940755	5.39752e-16	6.77308e-15	down
RPL28	0.775334	5.55662e-16	6.96824e-15	up
SLC14A1	-1.78851	5.63114e-16	7.04361e-15	down
MTHFD2	0.65262	6.55885e-16	8.15183e-15	up
EPS8	-0.696056	6.59021e-16	8.18561e-15	down
OGT	0.837932	6.68796e-16	8.29647e-15	up
TLN1	-0.739684	6.7079e-16	8.31065e-15	down
ZBTB42	0.588146	7.07028e-16	8.72641e-15	up
DSC3	-1.16125	7.18352e-16	8.86059e-15	down
PLIN4	-0.995811	7.40725e-16	9.11928e-15	down
EPOP	0.634245	8.00315e-16	9.80704e-15	up
BCAR3	-0.608177	8.00606e-16	9.80704e-15	down
FZD1	-0.68297	8.49228e-16	1.03766e-14	down
ESRP1	0.689353	8.90148e-16	1.0836e-14	up
ZNF577	0.638282	9.17324e-16	1.11529e-14	up
SEPTIN5	0.664621	9.36362e-16	1.13702e-14	up
ACTA2	-1.45647	9.5245e-16	1.15584e-14	down
EXOSC5	0.599919	9.53911e-16	1.15689e-14	up
TMEM100	-0.896037	9.9636e-16	1.20613e-14	down
SLIT3	-0.756222	1.00462e-15	1.21462e-14	down
PTGS2	-1.65374	1.02528e-15	1.2373e-14	down
LY6D	-0.993634	1.06207e-15	1.28091e-14	down
RARG	-0.781862	1.06725e-15	1.28557e-14	down
SV2B	-0.589953	1.07553e-15	1.29475e-14	down
ACTG2	-1.84395	1.09662e-15	1.31932e-14	down
CTNND2	0.74668	1.13638e-15	1.36631e-14	up
RGS9	-0.641835	1.17439e-15	1.41028e-14	down
PNCK	-0.836672	1.17697e-15	1.41251e-14	down
FBXL8	0.830193	1.21563e-15	1.45801e-14	up
CELF2	-0.790868	1.26295e-15	1.51198e-14	down
TBX5	-0.711711	1.33863e-15	1.59964e-14	down
ARFGEF3	1.10064	1.38347e-15	1.65222e-14	up
PLP1	-0.841863	1.40738e-15	1.67872e-14	down
SCRN1	-0.935331	1.43605e-15	1.71186e-14	down
RAPGEFL1	-0.73727	1.46397e-15	1.74302e-14	down
FLNA	-1.49846	1.4751e-15	1.7552e-14	down
DDIT4	-1.16612	1.52683e-15	1.81565e-14	down
MAP1B	-1.11363	1.66062e-15	1.964e-14	down
ZNF511	0.671978	1.71797e-15	2.02814e-14	up
OLFML2A	-0.806171	1.79432e-15	2.11189e-14	down
ACE	-0.750218	1.85145e-15	2.17783e-14	down
KLK3	1.55434	1.89577e-15	2.22593e-14	up
EFHD1	-0.918249	1.97104e-15	2.31293e-14	down
P2RY11	0.611734	2.00332e-15	2.34658e-14	up
RALGAPA2	0.983451	2.00467e-15	2.34675e-14	up
GDPD1	0.835699	2.08605e-15	2.43763e-14	up
KRT4	-1.22633	2.09401e-15	2.44548e-14	down
LGALS3	-1.17586	2.09843e-15	2.44782e-14	down
MPP6	0.630439	2.15208e-15	2.50616e-14	up
NFE2L2	-0.601147	2.17549e-15	2.52854e-14	down
BAIAP2	0.661871	2.18721e-15	2.54065e-14	up
BICDL1	0.63345	2.19051e-15	2.54298e-14	up
ATCAY	-0.624297	2.19899e-15	2.5513e-14	down
LAYN	-0.770727	2.21836e-15	2.57224e-14	down
HSPE1	0.605594	2.33147e-15	2.697e-14	up
CNN1	-1.64461	2.36296e-15	2.7318e-14	down
SERPINB1	-1.00633	2.56673e-15	2.96387e-14	down
HSPB6	-1.57734	2.57159e-15	2.96774e-14	down
KCNJ16	-0.591024	2.6049e-15	3.00263e-14	down
P2RX1	-0.957337	2.653e-15	3.05087e-14	down
NSG1	-1.13764	2.81064e-15	3.22456e-14	down
ZNF853	-0.671837	3.02796e-15	3.45967e-14	down
MPZ	-0.85078	3.04728e-15	3.4797e-14	down
SLC4A11	-0.598201	3.13642e-15	3.57106e-14	down
HMGN4	-0.613267	3.14753e-15	3.58162e-14	down
MFSD10	0.617095	3.17707e-15	3.61102e-14	up
KCTD17	-0.691689	3.18712e-15	3.62034e-14	down
EDIL3	-0.843516	3.27962e-15	3.72109e-14	down
SMTN	-1.10575	3.33292e-15	3.775e-14	down
BCHE	-0.94565	3.33849e-15	3.77692e-14	down
SFXN3	-0.699061	3.51446e-15	3.96911e-14	down
MTURN	-0.719618	3.58012e-15	4.03394e-14	down
RNF112	-0.723077	3.66022e-15	4.12181e-14	down
RP11-467J12.4	-1.36746	3.70873e-15	4.17403e-14	down
TACR2	-0.641398	3.77284e-15	4.24374e-14	down
TP53I11	0.663019	3.96689e-15	4.45176e-14	up
ELF4	-0.717841	4.02202e-15	4.50586e-14	down
VGLL1	-0.720922	4.11744e-15	4.60483e-14	down
LRATD2	0.688923	4.16048e-15	4.64765e-14	up
SCGB1A1	-2.39657	4.29811e-15	4.79317e-14	down
GPD1L	-0.771225	4.3613e-15	4.86087e-14	down
SGCG	-0.708239	4.44447e-15	4.94229e-14	down
TRABD	0.620359	4.53075e-15	5.03251e-14	up
GJB3	-0.825323	4.5656e-15	5.06834e-14	down
MYL9	-1.55634	4.68372e-15	5.19356e-14	down
ACAA2	-0.744345	4.76442e-15	5.28005e-14	down
SLC9A3R2	0.68812	5.03067e-15	5.56249e-14	up
RPS28	0.78647	5.04121e-15	5.57099e-14	up
GNG12	-0.625376	5.15832e-15	5.69076e-14	down
PYGM	-1.09923	5.28648e-15	5.82885e-14	down
ANXA13	-0.617628	5.37761e-15	5.92598e-14	down
CHDH	0.819362	5.55816e-15	6.11805e-14	up
BVES	-0.697159	5.78352e-15	6.36253e-14	down
PCDH10	-0.878169	5.78979e-15	6.36583e-14	down
ABCG1	0.671102	5.8586e-15	6.43787e-14	up
SPINK13	-0.61092	6.17475e-15	6.76246e-14	down
CHST15	-0.775259	6.39981e-15	7.00109e-14	down
FZD8	0.982549	6.45535e-15	7.05001e-14	up
TTC38	0.623266	6.59626e-15	7.19585e-14	up
CCN5	-0.945027	6.81758e-15	7.42486e-14	down
ECRG4	-1.26148	7.5007e-15	8.12804e-14	down
BMP5	-1.27187	7.51333e-15	8.13722e-14	down
CAP2	-0.903852	7.67862e-15	8.29784e-14	down
MARVELD1	-0.904188	7.71681e-15	8.3345e-14	down
TAGLN	-1.41607	7.72486e-15	8.33859e-14	down
UBE2S	0.674237	7.73658e-15	8.34663e-14	up
REXO2	0.922239	7.76306e-15	8.37057e-14	up
FADS1	-0.844276	7.84615e-15	8.4555e-14	down
TECPR1	0.694422	7.90366e-15	8.50808e-14	up
TK1	0.983357	8.03758e-15	8.64748e-14	up
LIMS2	-1.06011	8.06287e-15	8.66992e-14	down
WWTR1	-0.677362	8.0937e-15	8.69828e-14	down
PRSS16	-0.764329	8.23678e-15	8.83747e-14	down
LUZP2	1.20137	8.6631e-15	9.26942e-14	up
SH3RF1	1.05732	9.29594e-15	9.90857e-14	up
FBXL6	0.627637	9.31304e-15	9.92139e-14	up
GPX7	-0.887856	9.4143e-15	1.00074e-13	down
ZFAND5	-0.58557	9.70558e-15	1.03058e-13	down
CNTN1	-1.03105	9.945e-15	1.05543e-13	down
SPARCL1	-1.18963	1.00062e-14	1.06135e-13	down
GFUS	0.72475	1.02773e-14	1.08775e-13	up
C4orf19	-0.680701	1.04147e-14	1.10169e-13	down
BTG3	-0.704471	1.04657e-14	1.10649e-13	down
DNAJC15	-0.789217	1.05602e-14	1.11527e-13	down
ABO	-0.899332	1.17636e-14	1.23968e-13	down
MMP26	1.01946	1.25514e-14	1.31419e-13	up
CDK5RAP3	0.623489	1.25743e-14	1.31589e-13	up
INMT	-1.05529	1.26313e-14	1.32114e-13	down
KRT5	-2.16787	1.32553e-14	1.38271e-13	down
RAB34	-0.959236	1.33978e-14	1.39684e-13	down
PATE2	-0.651326	1.39373e-14	1.45075e-13	down
OAT	-0.981832	1.50705e-14	1.56288e-13	down
PGLS	0.619334	1.5219e-14	1.57745e-13	up
RPL18A	0.752536	1.62307e-14	1.67698e-13	up
ASPN	1.16473	1.624e-14	1.67704e-13	up
UBE2QL1	-0.622974	1.6324e-14	1.68483e-13	down
MEF2A	-0.641335	1.65046e-14	1.70257e-13	down
STOM	-0.954515	1.65858e-14	1.70914e-13	down
KRT16	-1.01613	1.66997e-14	1.71997e-13	down
CAPNS2	-0.917573	1.69288e-14	1.74265e-13	down
CDCA8	0.606007	1.72684e-14	1.7748e-13	up
CES1	-1.27181	1.78755e-14	1.83527e-13	down
IL33	-0.976612	1.85729e-14	1.90287e-13	down
SMPD2	0.592597	1.8714e-14	1.91632e-13	up
RUSC2	-0.631242	1.92408e-14	1.96923e-13	down
CDKN1C	-0.746201	1.94337e-14	1.98794e-13	down
BIRC5	0.884303	2.00609e-14	2.05102e-13	up
PTGIS	-1.11178	2.01453e-14	2.05858e-13	down
RPL12	0.714793	2.0491e-14	2.0917e-13	up
PLPP7	-0.613495	2.06275e-14	2.10454e-13	down
PDE2A	-0.595106	2.12015e-14	2.16149e-13	down
ZEB1	-0.73092	2.12077e-14	2.16149e-13	down
ATF5	0.650972	2.17022e-14	2.21073e-13	up
RPL36A	0.860397	2.19759e-14	2.23628e-13	up
CCDC159	0.595082	2.40396e-14	2.43992e-13	up
ZBTB38	-0.64701	2.45399e-14	2.48812e-13	down
GAS6	-0.88999	2.55309e-14	2.58324e-13	down
PAFAH1B3	0.797824	2.61066e-14	2.63875e-13	up
NEK7	-0.598067	2.69611e-14	2.7209e-13	down
TBC1D2	-0.643495	2.72872e-14	2.75031e-13	down
ZFP36L1	-0.933634	2.8273e-14	2.84155e-13	down
FZD7	-0.887363	2.95039e-14	2.95311e-13	down
XPO6	0.628479	2.96416e-14	2.96538e-13	up
PRDX4	0.677772	2.98053e-14	2.9787e-13	up
NCCRP1	-0.655998	2.99422e-14	2.99085e-13	down
CLIP2	-0.598137	3.04614e-14	3.03961e-13	down
CHMP4C	0.789947	3.07862e-14	3.07045e-13	up
ARHGEF19	-0.788749	3.18807e-14	3.17475e-13	down
UQCC3	0.767849	3.28979e-14	3.27271e-13	up
TUBB2A	1.11629	3.43522e-14	3.41043e-13	up
TENT5A	-0.799696	3.4803e-14	3.45343e-13	down
RPL37	0.651302	3.58862e-14	3.55723e-13	up
DES	-1.7425	3.59099e-14	3.55723e-13	down
FOXRED2	0.613007	3.59219e-14	3.55723e-13	up
CCK	-1.59774	3.89737e-14	3.84774e-13	down
SLC2A4	-0.976436	3.90058e-14	3.84896e-13	down
H2BU1	0.753308	4.05732e-14	3.99556e-13	up
B3GAT1	1.00313	4.19571e-14	4.12561e-13	up
PLN	-1.19222	4.20659e-14	4.13214e-13	down
INPP1	-0.681155	4.25439e-14	4.1728e-13	down
APBA2	0.631826	4.34387e-14	4.25416e-13	up
ZNF524	0.640025	4.60406e-14	4.50221e-13	up
PKIB	1.08634	4.67569e-14	4.56996e-13	up
INPP5D	-0.682246	4.70161e-14	4.58841e-13	down
SLC27A2	0.801495	4.73122e-14	4.61501e-13	up
H1-0	0.608512	4.76739e-14	4.64797e-13	up
KLK15	1.0988	4.95155e-14	4.8155e-13	up
RPL37A	0.674239	5.03172e-14	4.88185e-13	up
UFSP1	0.644806	5.14194e-14	4.9833e-13	up
MET	-0.859452	5.15853e-14	4.9969e-13	down
EME2	0.80638	5.38207e-14	5.21085e-13	up
PDIA3	0.599435	5.53621e-14	5.34684e-13	up
TWSG1	-0.632176	5.67725e-14	5.47763e-13	down
STARD4	-0.765768	6.15404e-14	5.90558e-13	down
SLIT1	0.990692	6.62497e-14	6.33571e-13	up
NDUFV2	0.602532	6.79711e-14	6.49716e-13	up
MICALL2	0.629398	6.81714e-14	6.51312e-13	up
TRERF1	-0.623898	6.92997e-14	6.61122e-13	down
CYP27A1	-1.46697	6.99354e-14	6.65238e-13	down
NPDC1	0.70785	7.08672e-14	6.73773e-13	up
MCAM	-0.983189	7.20752e-14	6.84591e-13	down
CKMT2	-0.723362	7.44063e-14	7.0639e-13	down
STAP2	0.680791	7.46578e-14	7.08433e-13	up
PI16	-1.61443	7.48585e-14	7.09648e-13	down
LSM7	0.684445	8.2734e-14	7.8035e-13	up
ACTN1	-0.799559	8.27501e-14	7.8035e-13	down
THBS4	1.56256	8.37391e-14	7.8848e-13	up
FAM174B	0.644596	8.4257e-14	7.92592e-13	up
CYSRT1	0.757893	8.46067e-14	7.95499e-13	up
GSTM1	-1.72245	8.55933e-14	8.04001e-13	down
MCRIP2	0.750072	8.57029e-14	8.04257e-13	up
PLAC9	-1.09117	8.69148e-14	8.15226e-13	down
RGS11	0.972725	8.69552e-14	8.15226e-13	up
PPM1H	0.737823	8.74601e-14	8.19566e-13	up
ITPR1	-1.06786	9.03599e-14	8.4441e-13	down
CACNA1D	1.27747	9.42331e-14	8.79659e-13	up
BDH2	-0.752334	9.84691e-14	9.18325e-13	down
WWC1	0.601624	9.96715e-14	9.28651e-13	up
EDRF1	0.590032	1.0024e-13	9.33502e-13	up
CA11	-0.794905	1.02735e-13	9.55825e-13	down
TWIST2	-0.838323	1.03375e-13	9.61328e-13	down
ANKRD35	-0.709067	1.09379e-13	1.01571e-12	down
PDE4D	-0.588668	1.10623e-13	1.02628e-12	down
RPLP0	0.598084	1.12337e-13	1.04119e-12	up
MATK	0.993068	1.12877e-13	1.04521e-12	up
BCAT2	0.614056	1.1518e-13	1.06502e-12	up
DLK2	-1.09455	1.15261e-13	1.06526e-12	down
CCDC136	-0.611999	1.16754e-13	1.07754e-12	down
APRT	0.75154	1.17242e-13	1.08153e-12	up
ITGA1	-0.813916	1.25578e-13	1.15461e-12	down
CCNB2	0.716334	1.28969e-13	1.18355e-12	up
CREB3L1	0.886147	1.34712e-13	1.2351e-12	up
MBOAT2	0.967322	1.41198e-13	1.29335e-12	up
RPL14	0.588936	1.44287e-13	1.31733e-12	up
SLC16A2	-0.696623	1.45125e-13	1.32436e-12	down
FGFR1	-0.706995	1.47092e-13	1.34043e-12	down
RASD2	-0.796114	1.48067e-13	1.34759e-12	down
SLC25A27	0.914854	1.4974e-13	1.36202e-12	up
CNN2	-0.828124	1.50207e-13	1.36563e-12	down
ZNF697	0.740659	1.52354e-13	1.38451e-12	up
ALDH1A3	1.08029	1.53407e-13	1.39343e-12	up
SH3BGRL	-0.919862	1.58072e-13	1.43314e-12	down
TSPAN7	-0.785746	1.58292e-13	1.43447e-12	down
TLE2	-0.679054	1.60257e-13	1.45093e-12	down
SLIRP	0.607951	1.63073e-13	1.47406e-12	up
RPL13A	0.614633	1.67041e-13	1.50537e-12	up
DAPL1	-1.10188	1.70954e-13	1.53992e-12	down
RPL38	0.691217	1.72381e-13	1.55207e-12	up
SPRED1	-0.586098	1.75378e-13	1.57759e-12	down
CCNL2	0.856099	1.78827e-13	1.60571e-12	up
MYBL2	0.97713	1.78963e-13	1.60615e-12	up
UBE2C	1.09024	1.8013e-13	1.61587e-12	up
TLR2	-0.616888	1.80538e-13	1.61879e-12	down
TWIST1	1.1844	1.80709e-13	1.61959e-12	up
LFNG	1.09389	1.84663e-13	1.65199e-12	up
ARHGEF17	-0.673369	1.95458e-13	1.74457e-12	down
C16orf89	-0.831797	1.97145e-13	1.75883e-12	down
SYT7	0.907388	1.97867e-13	1.76446e-12	up
UPK1A	-1.3883	1.99934e-13	1.78207e-12	down
NTN4	-1.13206	2.02402e-13	1.80079e-12	down
PNMA8A	-0.891458	2.05093e-13	1.8239e-12	down
DST	-0.754489	2.10582e-13	1.87101e-12	down
CNRIP1	-0.657978	2.14002e-13	1.89708e-12	down
PMP22	-0.902073	2.19649e-13	1.94538e-12	down
ZBTB47	-0.60816	2.20173e-13	1.94825e-12	down
SLC7A11	0.620518	2.22826e-13	1.96995e-12	up
SLC5A8	-0.601194	2.33321e-13	2.05714e-12	down
EFNA5	-0.692544	2.33446e-13	2.05731e-12	down
ZNF655	-0.895537	2.4831e-13	2.1824e-12	down
PLPP3	-0.898333	2.51861e-13	2.21162e-12	down
VSTM2L	1.57303	2.60112e-13	2.27998e-12	up
SLC12A4	-0.652478	2.71158e-13	2.3736e-12	down
TMC5	1.13382	2.78498e-13	2.4324e-12	up
HSF4	1.11625	2.80055e-13	2.44382e-12	up
ZNF581	0.613762	2.87265e-13	2.50226e-12	up
RAB26	0.86849	2.9851e-13	2.59674e-12	up
RASSF7	0.828462	3.09708e-13	2.69056e-12	up
REPS2	0.901967	3.16167e-13	2.74545e-12	up
ITGB4	-1.11748	3.22853e-13	2.79978e-12	down
NEDD4L	0.838558	3.43553e-13	2.97664e-12	up
DEFB132	-0.819046	3.71698e-13	3.20487e-12	down
RAB31	-0.775528	3.75521e-13	3.23521e-12	down
FEV	1.36028	3.83759e-13	3.30303e-12	up
FUT2	-0.633705	3.85496e-13	3.31652e-12	down
TEF	-0.628081	4.05276e-13	3.4775e-12	down
VSTM4	-0.751722	4.14966e-13	3.55753e-12	down
IER3	-1.32876	4.18254e-13	3.58414e-12	down
RGL1	-0.69835	4.25179e-13	3.64189e-12	down
PPP1R35	0.657048	4.25564e-13	3.64359e-12	up
H2BC12	0.918771	4.29287e-13	3.67224e-12	up
EVA1C	-0.729171	4.30886e-13	3.68431e-12	down
NEURL3	-0.606571	4.39963e-13	3.75535e-12	down
TUT7	0.774488	4.45453e-13	3.80055e-12	up
TPX2	0.87318	4.5563e-13	3.88229e-12	up
S100B	-0.865208	4.5716e-13	3.89364e-12	down
ID1	-1.49605	4.6009e-13	3.91518e-12	down
CDC20	0.884001	4.65531e-13	3.95802e-12	up
SLC40A1	-0.907897	4.79318e-13	4.06993e-12	down
CDIP1	-0.659319	4.79675e-13	4.07119e-12	down
TRNP1	-0.655411	4.86598e-13	4.121e-12	down
MYDGF	0.585225	4.93602e-13	4.1767e-12	up
SLC22A17	-0.809398	4.96346e-13	4.1981e-12	down
PROM1	-0.783156	4.98612e-13	4.21544e-12	down
MSMO1	-0.736295	4.99769e-13	4.2234e-12	down
TUBB6	-0.807717	5.04193e-13	4.25893e-12	down
TMEM125	0.683894	5.14891e-13	4.34555e-12	up
MRPL12	0.789759	5.19862e-13	4.37994e-12	up
NTF4	-0.645872	5.22424e-13	4.39773e-12	down
H2AC8	1.27375	5.29418e-13	4.45276e-12	up
HJURP	0.69641	5.47682e-13	4.5886e-12	up
SCD5	-0.791308	5.61939e-13	4.70603e-12	down
PDE5A	-1.05953	5.80074e-13	4.85374e-12	down
SH3PXD2A	-0.687142	5.92151e-13	4.95055e-12	down
RHPN2	0.873698	6.07388e-13	5.07143e-12	up
FHL2	-0.93279	6.24114e-13	5.20441e-12	down
C5orf49	0.62171	6.38491e-13	5.31605e-12	up
RPS29	0.617665	6.4635e-13	5.37836e-12	up
SGCA	-1.00186	6.64348e-13	5.51638e-12	down
SLC22A23	0.740602	7.12824e-13	5.90134e-12	up
HSPB7	-1.09342	7.26332e-13	6.00553e-12	down
SPON2	2.12085	7.45392e-13	6.15305e-12	up
OXLD1	0.585018	7.6175e-13	6.28243e-12	up
VSIR	-0.749273	7.85849e-13	6.47572e-12	down
MPST	0.654403	7.93599e-13	6.53131e-12	up
PHLDA1	-0.78746	8.0515e-13	6.6208e-12	down
ETV5	-0.794183	8.51654e-13	6.99144e-12	down
PLA2G7	1.459	9.0984e-13	7.45657e-12	up
ENTPD5	1.20297	9.49945e-13	7.77546e-12	up
NPPC	-1.08663	9.83331e-13	8.04199e-12	down
PPP1R14A	-1.12913	1.00747e-12	8.23598e-12	down
PWWP2B	0.596578	1.01098e-12	8.26119e-12	up
TPM2	-1.41854	1.07994e-12	8.78065e-12	down
P2RX2	-0.689136	1.12506e-12	9.14367e-12	down
PDLIM7	-0.985638	1.12661e-12	9.14864e-12	down
SCGB2A1	-1.08192	1.14908e-12	9.31953e-12	down
MKI67	0.682861	1.1783e-12	9.5486e-12	up
ERN2	-0.634967	1.22668e-12	9.9242e-12	down
ANXA1	-1.04104	1.2709e-12	1.02607e-11	down
SRPX	-0.899163	1.39387e-12	1.12256e-11	down
TDRD1	1.40929	1.43702e-12	1.15589e-11	up
MAPK8IP2	0.794558	1.43949e-12	1.15692e-11	up
COPZ2	-0.81674	1.47563e-12	1.18548e-11	down
KRT13	-1.95698	1.49245e-12	1.19702e-11	down
EMP3	-0.811323	1.49717e-12	1.20032e-11	down
PPIC	-0.725368	1.5075e-12	1.2081e-11	down
TMEM52	0.645807	1.52007e-12	1.21717e-11	up
TCEA3	0.624265	1.54439e-12	1.23614e-11	up
CENPN	1.09581	1.56274e-12	1.24828e-11	up
KCNH2	-0.726555	1.56623e-12	1.25004e-11	down
ALDOC	-0.626654	1.56872e-12	1.25152e-11	down
HOXB6	-0.695187	1.58816e-12	1.26599e-11	down
AHR	-0.845096	1.58917e-12	1.26628e-11	down
CCDC3	-0.947186	1.6047e-12	1.27761e-11	down
SH3BGR	-0.780934	1.62099e-12	1.29006e-11	down
PHF12	0.593611	1.63163e-12	1.29799e-11	up
HOXB3	-0.587708	1.65769e-12	1.31659e-11	down
MCOLN2	0.662801	1.69339e-12	1.34385e-11	up
ACACA	0.696398	1.82046e-12	1.44175e-11	up
HSD11B1	-0.876473	2.05388e-12	1.61809e-11	down
NOTCH1	-0.679585	2.07753e-12	1.63606e-11	down
ZIC2	0.850315	2.11901e-12	1.66623e-11	up
KLF5	-0.955963	2.14463e-12	1.68551e-11	down
GADD45A	-0.785856	2.22996e-12	1.75046e-11	down
SMARCD3	-0.679913	2.24635e-12	1.76262e-11	down
ALDH2	-0.928865	2.43139e-12	1.89942e-11	down
SERP2	-0.60956	2.43591e-12	1.90219e-11	down
GNPNAT1	0.652837	2.50895e-12	1.95766e-11	up
DECR2	0.598799	2.55967e-12	1.99485e-11	up
CBLC	0.997338	2.57116e-12	2.003e-11	up
PEG10	-0.756382	2.64962e-12	2.06084e-11	down
ZCCHC24	-0.59072	2.73956e-12	2.12782e-11	down
STEAP3	-0.676271	2.74009e-12	2.12782e-11	down
KIFC1	0.669617	2.75374e-12	2.13672e-11	up
VASN	0.715769	2.79743e-12	2.16976e-11	up
DMPK	-0.743474	2.81198e-12	2.17931e-11	down
EMB	0.722999	2.82271e-12	2.1859e-11	up
P3H3	-0.837608	2.90286e-12	2.24263e-11	down
FADS2	-1.4846	3.03572e-12	2.34249e-11	down
HBB	-1.14509	3.12826e-12	2.41009e-11	down
MAL2	0.669977	3.24086e-12	2.49291e-11	up
OSR2	-0.674624	3.26505e-12	2.51053e-11	down
PCP4	-1.47022	3.2986e-12	2.53433e-11	down
PRR22	0.603154	3.34343e-12	2.56777e-11	up
NSMCE1	0.653358	3.41078e-12	2.6164e-11	up
SCAND1	0.745518	3.6221e-12	2.76656e-11	up
MATN2	-0.933805	3.90235e-12	2.97132e-11	down
ATP6V0E2	0.661124	4.03776e-12	3.06725e-11	up
POGLUT3	-0.642194	4.0491e-12	3.07467e-11	down
NDNF	-0.969343	4.06266e-12	3.08377e-11	down
RPL29	0.618311	4.08177e-12	3.09707e-11	up
H2AC17	0.713738	4.22691e-12	3.20098e-11	up
FOXD1	0.868387	4.29511e-12	3.25137e-11	up
SDK1	1.11692	4.34298e-12	3.28224e-11	up
CLCA4	-0.78637	4.4204e-12	3.33716e-11	down
FOXM1	0.626204	4.52273e-12	3.40784e-11	up
H2AX	0.630405	4.64039e-12	3.4911e-11	up
UST	-0.620069	4.66601e-12	3.50903e-11	down
PRR16	1.4041	4.72424e-12	3.55145e-11	up
TIMP4	-0.903515	4.73636e-12	3.55919e-11	down
CRABP1	-0.729988	4.80992e-12	3.61308e-11	down
RRM2	0.785073	4.95511e-12	3.71643e-11	up
SLC25A29	0.626118	4.99326e-12	3.74073e-11	up
SYDE1	-0.659512	5.01406e-12	3.75344e-11	down
CDCA5	0.60224	5.08209e-12	3.79999e-11	up
COMP	1.78373	5.0976e-12	3.80868e-11	up
RPS24	0.621565	5.10079e-12	3.8096e-11	up
STEAP2	0.923136	5.21869e-12	3.89442e-11	up
OR51C1P	1.16959	5.33709e-12	3.97242e-11	up
SLC13A3	0.804586	5.56461e-12	4.13232e-11	up
GABRB3	0.851975	5.84657e-12	4.33347e-11	up
MSN	-0.820912	5.95218e-12	4.41007e-11	down
F12	0.648393	5.99265e-12	4.43837e-11	up
EXOSC4	0.622584	5.99666e-12	4.43967e-11	up
CHN1	-0.610982	6.07063e-12	4.48932e-11	down
CD320	0.69308	6.17339e-12	4.55669e-11	up
H2BC8	1.23045	6.19607e-12	4.56826e-11	up
MYRIP	0.673808	6.2741e-12	4.62404e-11	up
NEIL1	0.662322	6.32947e-12	4.65783e-11	up
ATOH8	-0.782667	6.49754e-12	4.77611e-11	down
RAB24	0.589676	6.72489e-12	4.93395e-11	up
DUSP2	-1.18595	6.78394e-12	4.97166e-11	down
NAAA	0.711559	7.20984e-12	5.2739e-11	up
TMEM158	-0.955603	7.22421e-12	5.28046e-11	down
TRIM22	-0.826161	7.30812e-12	5.33779e-11	down
SERGEF	0.585003	7.37602e-12	5.38538e-11	up
CCNB1	0.630349	7.3826e-12	5.38817e-11	up
PYGL	-0.865445	7.45075e-12	5.42979e-11	down
ITGB1	-0.844691	7.5395e-12	5.49242e-11	down
PPP3CA	0.806218	7.56273e-12	5.50729e-11	up
H3C10	1.15107	7.79945e-12	5.667e-11	up
PTGDS	-1.491	7.86662e-12	5.71156e-11	down
RSPO3	-0.763891	8.03568e-12	5.82997e-11	down
DPYD	-0.698152	8.18565e-12	5.92997e-11	down
OTX1	0.800135	8.2099e-12	5.94533e-11	up
NID1	-0.899096	8.33604e-12	6.03221e-11	down
SCN7A	-0.682652	8.54115e-12	6.16692e-11	down
FAM117B	0.762537	9.1758e-12	6.60563e-11	up
YJEFN3	0.75923	9.43712e-12	6.78625e-11	up
ELF1	-0.708769	9.69865e-12	6.96662e-11	down
PHGR1	1.22181	9.86689e-12	7.08487e-11	up
KCNK3	-1.15485	9.93143e-12	7.12597e-11	down
LSAMP	-1.09292	1.11894e-11	7.97298e-11	down
TRPM8	1.49248	1.12758e-11	8.03156e-11	up
RAI2	-0.647831	1.13625e-11	8.0845e-11	down
SAMD5	0.914184	1.14181e-11	8.11709e-11	up
PIP	-2.02331	1.25081e-11	8.83847e-11	down
CCDC154	0.802548	1.34902e-11	9.51867e-11	up
BMP7	-0.892649	1.3573e-11	9.57017e-11	down
TMEM178A	1.62409	1.36786e-11	9.64118e-11	up
TBX1	1.08249	1.38383e-11	9.75021e-11	up
KRT8	0.587146	1.4074e-11	9.9019e-11	up
DLX2	0.724041	1.45371e-11	1.02168e-10	up
C19orf18	0.618489	1.57925e-11	1.10309e-10	up
LYPD6B	-0.709433	1.61153e-11	1.1241e-10	down
ADGRA2	-1.02973	1.69435e-11	1.18019e-10	down
HSD3B7	0.633391	1.69847e-11	1.18244e-10	up
SIX1	0.684432	1.84365e-11	1.27871e-10	up
CALML3	-0.749397	1.89899e-11	1.31436e-10	down
OPTN	-0.66389	1.97839e-11	1.36586e-10	down
PAOX	0.739714	2.062e-11	1.42057e-10	up
PFKFB3	-0.726433	2.08856e-11	1.43583e-10	down
ITGA5	-0.947833	2.12329e-11	1.45671e-10	down
RPRM	-0.767889	2.2593e-11	1.54438e-10	down
PDIA4	0.587276	2.28574e-11	1.56095e-10	up
SERPINF1	-1.03904	2.31811e-11	1.5814e-10	down
LYNX1	-0.592777	2.36691e-11	1.613e-10	down
ID2	-0.880406	2.47761e-11	1.68199e-10	down
PRR15L	0.65695	2.64724e-11	1.79317e-10	up
PJA2	-0.626508	2.65874e-11	1.7987e-10	down
H4C5	1.22456	2.88734e-11	1.94594e-10	up
ARSJ	-0.601783	2.94752e-11	1.98445e-10	down
CYTL1	-0.737936	3.04167e-11	2.0429e-10	down
D2HGDH	0.587687	3.23578e-11	2.16583e-10	up
ADD3	-0.860669	3.38037e-11	2.25412e-10	down
HSPB3	-0.908694	3.58262e-11	2.37924e-10	down
HAGHL	0.68771	3.62494e-11	2.40571e-10	up
CFH	-0.731504	3.69216e-11	2.44783e-10	down
CLEC3B	-0.92062	3.79443e-11	2.51307e-10	down
FABP3	-1.04283	3.87766e-11	2.56385e-10	down
ABHD11	0.650038	3.95296e-11	2.61275e-10	up
NUDT8	1.34118	3.95453e-11	2.61291e-10	up
NOXA1	0.803191	3.99715e-11	2.63928e-10	up
SFRP5	-0.683512	4.0481e-11	2.67112e-10	down
BEX1	-1.06065	4.13725e-11	2.72626e-10	down
FAM174C	0.62913	4.21758e-11	2.77638e-10	up
CPQ	-0.614907	4.25833e-11	2.80227e-10	down
ST3GAL1	-0.634723	4.26948e-11	2.80866e-10	down
TIMP2	-0.828469	4.64853e-11	3.04162e-10	down
FBXO2	-0.805522	4.67284e-11	3.05651e-10	down
NDN	-0.614309	4.78793e-11	3.12551e-10	down
AOC3	-0.972077	5.14064e-11	3.34905e-10	down
KIRREL1	-0.659815	5.18854e-11	3.37913e-10	down
CCDC80	-0.922743	5.35644e-11	3.48151e-10	down
OGN	-1.11383	5.54145e-11	3.60056e-10	down
NME2	0.596598	5.69718e-11	3.6956e-10	up
NELL2	-0.912637	6.33481e-11	4.08615e-10	down
CSPG4	-0.740411	6.45151e-11	4.15594e-10	down
MACROD1	0.61271	6.73624e-11	4.33222e-10	up
BGN	0.99823	6.79665e-11	4.36963e-10	up
AMT	-0.696704	7.00835e-11	4.50128e-10	down
CCNA2	0.602386	7.19947e-11	4.61645e-10	up
EPB41L2	-0.609827	7.351e-11	4.71053e-10	down
NANS	0.646785	7.86388e-11	5.0227e-10	up
CD82	-0.596733	7.99286e-11	5.09509e-10	down
TRIM2	-0.787957	8.53318e-11	5.42183e-10	down
TUBA1A	-0.810705	8.79936e-11	5.57645e-10	down
SERPINF2	-0.953059	8.81686e-11	5.58573e-10	down
LAPTM4B	-0.770648	8.93256e-11	5.65536e-10	down
MYADM	-0.723149	9.12341e-11	5.77058e-10	down
CRAT	0.702522	9.30723e-11	5.87543e-10	up
CD38	-1.53812	9.327e-11	5.88601e-10	down
TGFBR2	-0.80488	9.44976e-11	5.96155e-10	down
CSTA	-1.03366	9.86966e-11	6.20442e-10	down
DPYS	-0.807044	1.04259e-10	6.53515e-10	down
TGFB3	-1.0582	1.04572e-10	6.55266e-10	down
C4orf48	0.849188	1.05673e-10	6.61953e-10	up
ETS2	-0.926213	1.05752e-10	6.62236e-10	down
ANTXR1	-0.888106	1.09377e-10	6.83842e-10	down
PLAU	-0.706989	1.09659e-10	6.85388e-10	down
MRGPRF	-0.958383	1.11495e-10	6.96418e-10	down
MAOB	-1.28104	1.1279e-10	7.04056e-10	down
PCDH18	-0.691035	1.20905e-10	7.51273e-10	down
VILL	-0.68143	1.2171e-10	7.55629e-10	down
MYC	0.89582	1.27225e-10	7.88118e-10	up
SEZ6L2	0.812907	1.29978e-10	8.04408e-10	up
ISL1	-0.598949	1.34243e-10	8.287e-10	down
NPM3	0.608754	1.36858e-10	8.43511e-10	up
LDAH	-0.738327	1.41154e-10	8.68896e-10	down
RNF208	0.648372	1.44531e-10	8.88841e-10	up
CCDC78	0.676832	1.485e-10	9.11528e-10	up
NFE2L3	0.64342	1.52709e-10	9.36483e-10	up
FOXF1	-0.877956	1.57916e-10	9.67807e-10	down
SYT11	-0.709162	1.61997e-10	9.92191e-10	down
EPHB3	0.65447	1.63295e-10	9.99832e-10	up
JAM3	-0.793426	1.69661e-10	1.03528e-09	down
CLIC3	-0.605829	1.69668e-10	1.03528e-09	down
A4GALT	-0.613179	1.73023e-10	1.05509e-09	down
HOXD10	-0.696522	1.73372e-10	1.05656e-09	down
TRPV6	0.75363	1.78093e-10	1.08466e-09	up
DEFB1	-1.33049	1.8674e-10	1.13485e-09	down
ABHD17C	0.597329	2.05172e-10	1.23953e-09	up
OLFML1	-0.679008	2.27695e-10	1.36883e-09	down
PLEKHH1	0.790417	2.52512e-10	1.51013e-09	up
PHLDA3	-0.68416	2.55752e-10	1.52763e-09	down
CKM	-1.58141	2.56298e-10	1.52995e-09	down
PET100	0.596677	2.59768e-10	1.54878e-09	up
LGALS3BP	-0.989823	2.60007e-10	1.54973e-09	down
EYA1	-0.698087	2.65646e-10	1.58212e-09	down
RNF128	-0.674502	2.67158e-10	1.59041e-09	down
JCAD	-0.667737	2.73425e-10	1.62426e-09	down
GLIS2	-0.6057	2.78987e-10	1.65578e-09	down
POLB	0.642697	2.82166e-10	1.67412e-09	up
ACLY	0.644869	2.92796e-10	1.73038e-09	up
CYTH3	0.63404	3.04598e-10	1.79687e-09	up
CD248	-0.740031	3.09191e-10	1.82121e-09	down
SEMA3B	-0.601878	3.12441e-10	1.83925e-09	down
MMP14	-0.77295	3.16181e-10	1.86015e-09	down
FCER1A	-0.733472	3.22589e-10	1.89613e-09	down
SYNPO	-0.733742	3.27304e-10	1.92269e-09	down
F10	-0.721716	3.35155e-10	1.96762e-09	down
LRRC26	1.26874	3.43514e-10	2.01187e-09	up
SLC26A3	-1.13573	3.44924e-10	2.01831e-09	down
SLC45A2	1.0212	3.49947e-10	2.04647e-09	up
ARHGDIG	0.798804	3.73581e-10	2.17686e-09	up
CYP2J2	0.952584	3.80385e-10	2.21321e-09	up
CXCL13	-1.32351	3.90469e-10	2.26715e-09	down
RSPH1	0.658744	3.9401e-10	2.28704e-09	up
POF1B	-0.624258	3.97908e-10	2.30897e-09	down
MACIR	0.784941	4.09443e-10	2.37239e-09	up
ASS1	-0.922172	4.14355e-10	2.3973e-09	down
ADRB2	0.663513	4.14588e-10	2.39794e-09	up
NGFR	-0.83694	4.18362e-10	2.41905e-09	down
LDLRAD3	0.615649	4.68243e-10	2.6963e-09	up
IFI27L2	-0.722172	5.32497e-10	3.05279e-09	down
SLC6A11	0.596702	5.39133e-10	3.08812e-09	up
ADA2	-0.734505	5.58539e-10	3.19553e-09	down
FCGBP	-0.931681	5.6577e-10	3.23312e-09	down
FABP5	1.6326	5.81087e-10	3.31289e-09	up
C1orf54	-0.601054	6.5467e-10	3.71075e-09	down
SPTBN1	-0.621285	6.69351e-10	3.78298e-09	down
PSAT1	0.712688	6.81066e-10	3.84697e-09	up
LYPLA1	0.630323	6.97838e-10	3.93943e-09	up
RSPO2	-0.613784	7.20941e-10	4.05812e-09	down
CORO2A	0.656655	7.28726e-10	4.09958e-09	up
HEXD	0.612405	7.30208e-10	4.10589e-09	up
LAMA4	-0.630644	7.33468e-10	4.11796e-09	down
SLCO2A1	-0.742769	7.41515e-10	4.16194e-09	down
CIB2	-0.754402	7.43936e-10	4.17433e-09	down
INSM1	0.869006	7.61888e-10	4.26771e-09	up
TXNRD2	0.629696	7.78593e-10	4.35878e-09	up
MEX3A	0.863266	7.94011e-10	4.44001e-09	up
ADAMTSL3	-0.608592	8.02915e-10	4.48537e-09	down
DCN	-0.996264	8.14491e-10	4.54283e-09	down
RPS21	0.614703	8.20756e-10	4.57167e-09	up
CLDN8	1.02668	8.40655e-10	4.67009e-09	up
KRT7	-1.45951	8.41658e-10	4.67434e-09	down
ZBTB10	0.628844	8.64337e-10	4.79348e-09	up
RPS26	0.774228	8.85031e-10	4.8999e-09	up
KCNE3	-0.592182	9.7708e-10	5.376e-09	down
COX7A1	-0.994417	1.00141e-09	5.49861e-09	down
RAP1GAP2	0.678349	1.00161e-09	5.49861e-09	up
MME	-1.3398	1.02741e-09	5.62914e-09	down
DPYSL2	-0.585762	1.04836e-09	5.72788e-09	down
PLXNB3	0.616168	1.09608e-09	5.98022e-09	up
AOC1	-1.52672	1.12124e-09	6.10726e-09	down
CMTM4	0.694696	1.12433e-09	6.1224e-09	up
PTPRU	-0.636998	1.14323e-09	6.22014e-09	down
ADPRHL1	0.709946	1.14624e-09	6.23323e-09	up
H2AJ	0.912481	1.1579e-09	6.2894e-09	up
SCNN1A	-1.02654	1.16688e-09	6.33467e-09	down
HOMER2	0.619291	1.23435e-09	6.67313e-09	up
TFPT	0.633395	1.25629e-09	6.78802e-09	up
ACKR3	-0.72768	1.26722e-09	6.84139e-09	down
B3GNT3	-0.832549	1.31973e-09	7.10718e-09	down
PTTG1	0.657938	1.37003e-09	7.36588e-09	up
DOP1B	0.609235	1.38642e-09	7.44785e-09	up
FBXO27	-0.62697	1.39663e-09	7.4965e-09	down
RNF157	0.959262	1.40134e-09	7.51768e-09	up
CYBA	-0.745895	1.49672e-09	8.00739e-09	down
NTN1	-0.602343	1.51488e-09	8.0979e-09	down
CENPU	0.599697	1.53798e-09	8.21461e-09	up
THSD4	-0.825217	1.5849e-09	8.43754e-09	down
FILIP1L	-0.933052	1.64586e-09	8.74301e-09	down
LGALS1	-0.860259	1.66635e-09	8.84707e-09	down
DNASE2B	1.15414	1.74883e-09	9.25475e-09	up
CTHRC1	0.868433	1.79994e-09	9.50721e-09	up
PLEKHB1	0.744144	1.83108e-09	9.66387e-09	up
RPS19	0.624064	1.87326e-09	9.87315e-09	up
MUC4	-0.622896	1.88857e-09	9.94579e-09	down
CYB561A3	0.612349	1.9477e-09	1.02434e-08	up
GPR37	0.597818	1.96001e-09	1.03054e-08	up
IL17RE	-0.662685	2.08684e-09	1.0934e-08	down
SELENOM	-0.841621	2.11062e-09	1.10508e-08	down
IER5	-0.607642	2.11567e-09	1.10731e-08	down
CPXM1	-0.865678	2.13636e-09	1.11754e-08	down
MZT2B	0.636014	2.18504e-09	1.14117e-08	up
DCXR	0.756205	2.30208e-09	1.19718e-08	up
RNASE1	-0.706233	2.38255e-09	1.23672e-08	down
CXCL6	-0.654175	2.48597e-09	1.28699e-08	down
ARL4C	-0.640685	2.52012e-09	1.30398e-08	down
TOX3	0.677568	2.56944e-09	1.32809e-08	up
KIFC2	0.748605	2.57205e-09	1.32877e-08	up
ALCAM	0.607987	2.57212e-09	1.32877e-08	up
ZWINT	0.618932	2.57537e-09	1.3301e-08	up
DACT3	-0.647188	2.60528e-09	1.34519e-08	down
TXNIP	-0.624504	2.76244e-09	1.42183e-08	down
CA2	-0.813663	2.77776e-09	1.42933e-08	down
IRX4	0.987082	2.84336e-09	1.45963e-08	up
AMOTL2	-0.661788	2.9089e-09	1.49092e-08	down
ITGA7	-0.771579	3.15925e-09	1.61205e-08	down
MZB1	0.916939	3.33513e-09	1.69692e-08	up
GUCY1A1	0.843839	3.48008e-09	1.76424e-08	up
FERMT1	-0.674502	3.62188e-09	1.83185e-08	down
HSPB1	-0.939485	3.62509e-09	1.83252e-08	down
SIX2	-0.647593	3.91083e-09	1.9678e-08	down
ASF1B	0.615892	4.06524e-09	2.04339e-08	up
SULF2	-0.630048	4.28564e-09	2.1492e-08	down
SLC45A3	1.1406	4.36341e-09	2.18652e-08	up
HES6	0.787851	4.60207e-09	2.30139e-08	up
CEACAM6	-0.761483	4.75896e-09	2.37741e-08	down
PRELP	-0.886053	4.89905e-09	2.4449e-08	down
CD55	-0.680065	4.90641e-09	2.44794e-08	down
SEMA3D	-0.779641	4.90979e-09	2.449e-08	down
IFI16	-0.655977	5.1916e-09	2.57838e-08	down
CST2	1.57325	5.29741e-09	2.62692e-08	up
AADAT	0.716289	5.29964e-09	2.62736e-08	up
RBP4	-0.670321	5.41244e-09	2.68192e-08	down
TOP2A	0.764405	5.41513e-09	2.68258e-08	up
GTF3C6	0.589882	5.69598e-09	2.81599e-08	up
CASQ1	-0.822633	5.71715e-09	2.82503e-08	down
CASQ2	-0.789326	5.94707e-09	2.93197e-08	down
RAB23	-0.691274	5.96994e-09	2.9425e-08	down
MMP9	1.00121	6.1879e-09	3.04609e-08	up
H4C4	0.622883	6.30951e-09	3.10283e-08	up
SERINC5	0.766269	6.65577e-09	3.26243e-08	up
NME3	0.605973	7.10541e-09	3.47064e-08	up
SFRP4	1.20925	7.23674e-09	3.52949e-08	up
UCHL1	-0.74084	7.44778e-09	3.6288e-08	down
ARMCX2	-0.724238	7.45246e-09	3.63017e-08	down
TIPARP	-0.700905	7.6217e-09	3.70614e-08	down
PRUNE2	-0.808521	7.79723e-09	3.78396e-08	down
PABPC1L	0.688378	7.98338e-09	3.86183e-08	up
AKAP12	-0.772304	8.25264e-09	3.98781e-08	down
GALNT3	0.741577	8.66552e-09	4.17629e-08	up
TSC22D3	-0.644354	8.70931e-09	4.19503e-08	down
PITX1	-0.691407	8.91536e-09	4.29035e-08	down
PTGES	-0.884914	8.94763e-09	4.30376e-08	down
LMNB1	0.608414	9.29465e-09	4.46079e-08	up
NWD1	0.654738	9.38521e-09	4.50094e-08	up
TFF3	1.97442	1.03288e-08	4.93407e-08	up
PXDN	0.65698	1.05093e-08	5.01661e-08	up
CPNE7	0.861017	1.09316e-08	5.2093e-08	up
TMEM150C	0.585364	1.10671e-08	5.27e-08	up
CPNE4	0.69225	1.11525e-08	5.3081e-08	up
IGF2	-0.822072	1.14069e-08	5.42125e-08	down
KRT14	-1.40704	1.14198e-08	5.42609e-08	down
MS4A8	1.18144	1.14465e-08	5.43612e-08	up
S1PR3	-0.607962	1.15041e-08	5.46082e-08	down
LDHB	-0.889725	1.16575e-08	5.52962e-08	down
COL10A1	0.921656	1.19875e-08	5.6765e-08	up
EPAS1	-0.654485	1.21708e-08	5.7563e-08	down
AXL	-0.626879	1.27552e-08	6.01378e-08	down
NKAIN1	1.37347	1.29996e-08	6.12457e-08	up
SOX2	-0.633718	1.31599e-08	6.19262e-08	down
AMIGO2	-0.64195	1.35657e-08	6.37589e-08	down
DUSP4	-0.857834	1.36617e-08	6.4164e-08	down
TGFB2	-0.672022	1.3973e-08	6.55474e-08	down
ASCL2	-0.685694	1.40635e-08	6.59241e-08	down
SGK1	-1.1021	1.44176e-08	6.74766e-08	down
SLPI	-1.59841	1.46281e-08	6.83903e-08	down
AK5	0.782017	1.48843e-08	6.94884e-08	up
NES	-0.709814	1.54686e-08	7.20958e-08	down
NRSN2	-0.657383	1.55914e-08	7.26483e-08	down
ADGRL2	-0.735243	1.66131e-08	7.71538e-08	down
MYO6	0.875306	1.7801e-08	8.23382e-08	up
ITGA8	-0.975841	1.81424e-08	8.38178e-08	down
SMS	1.00428	1.84372e-08	8.50793e-08	up
KDR	-0.652449	1.85009e-08	8.5353e-08	down
PDE3B	0.62753	1.87292e-08	8.63654e-08	up
GBP2	-0.700745	1.90637e-08	8.78461e-08	down
CARTPT	-0.925077	2.01252e-08	9.23234e-08	down
KRT15	-1.52199	2.04034e-08	9.34902e-08	down
H4C8	0.997756	2.12227e-08	9.70391e-08	up
BMP4	-0.630455	2.14578e-08	9.80684e-08	down
SP5	0.876149	2.14641e-08	9.80743e-08	up
HK2	0.656887	2.44289e-08	1.11257e-07	up
ZNF467	0.632099	2.55883e-08	1.15969e-07	up
PTGER2	-0.625781	2.59979e-08	1.17607e-07	down
SDC1	-0.89018	2.70252e-08	1.22142e-07	down
PROK1	-0.931499	2.74576e-08	1.24038e-07	down
TRIM68	0.588164	2.84124e-08	1.28174e-07	up
ELOVL7	0.74971	2.85395e-08	1.28658e-07	up
HOXB7	-0.593825	2.90396e-08	1.30852e-07	down
APLN	0.707025	3.0469e-08	1.36851e-07	up
DSC2	0.661091	3.05191e-08	1.37045e-07	up
KCNQ1	-0.615181	3.20863e-08	1.43686e-07	down
PABPC1L2B	0.682043	3.26435e-08	1.46081e-07	up
RSRP1	0.750182	3.41181e-08	1.52122e-07	up
PPM1E	0.697804	3.7219e-08	1.64894e-07	up
CAMK2B	0.591902	3.87589e-08	1.71212e-07	up
CITED4	-0.660101	4.00829e-08	1.76781e-07	down
OLFM2	0.632355	4.23591e-08	1.86525e-07	up
SRMS	0.864371	4.29564e-08	1.88739e-07	up
CX3CL1	-0.778266	4.33422e-08	1.90297e-07	down
NAALADL2	0.671598	4.5072e-08	1.97492e-07	up
SLC34A2	-0.858343	4.6166e-08	2.01788e-07	down
GYPC	-0.587316	5.14756e-08	2.23894e-07	down
MYOM1	-0.720828	5.16369e-08	2.24545e-07	down
H1-4	0.820888	5.27991e-08	2.29191e-07	up
TBC1D4	0.611569	5.35203e-08	2.32218e-07	up
ANTXR2	-0.674663	5.35745e-08	2.32386e-07	down
PDE9A	0.609336	5.90903e-08	2.55196e-07	up
SPRY1	-0.647289	6.04459e-08	2.60705e-07	down
TCF21	-0.585381	6.08484e-08	2.62209e-07	down
PEX10	0.951091	6.2267e-08	2.6779e-07	up
DAPK1	0.6057	6.49563e-08	2.78865e-07	up
ABHD2	0.852605	6.51935e-08	2.79761e-07	up
MCCC2	0.967618	6.5746e-08	2.81946e-07	up
PDLIM4	-0.692693	6.62665e-08	2.84053e-07	down
ADAM2	0.738934	7.07914e-08	3.02653e-07	up
GNG13	0.599996	7.0851e-08	3.02841e-07	up
RPS4Y1	0.591757	7.30375e-08	3.1171e-07	up
BBS4	0.612796	7.46033e-08	3.18114e-07	up
MMP10	0.906591	7.94052e-08	3.37192e-07	up
GBP1	-0.65514	8.00379e-08	3.39731e-07	down
RTN1	0.729807	8.04718e-08	3.41424e-07	up
GSN	-0.664897	8.12368e-08	3.44445e-07	down
IGFBP4	-0.723581	8.1935e-08	3.47029e-07	down
SERTM2	-0.865362	8.36665e-08	3.53902e-07	down
STEAP4	0.92367	8.45227e-08	3.57292e-07	up
CXCL17	-1.13112	9.12431e-08	3.84287e-07	down
CCL18	0.809946	9.15866e-08	3.85567e-07	up
ATP2A3	-0.725265	9.41233e-08	3.9582e-07	down
SPOCK1	0.915995	1.03433e-07	4.32551e-07	up
NEFL	-0.699528	1.12156e-07	4.66237e-07	down
H3C4	0.746822	1.22024e-07	5.05567e-07	up
NXPE4	-0.692618	1.23458e-07	5.11043e-07	down
PTPRN2	0.845624	1.27809e-07	5.28046e-07	up
BATF	-0.669528	1.32206e-07	5.45289e-07	down
STING1	-0.612625	1.40136e-07	5.75204e-07	down
ADRA2A	0.751797	1.40841e-07	5.77976e-07	up
BAIAP2L2	0.801577	1.45966e-07	5.97877e-07	up
PYCARD	-0.606381	1.49646e-07	6.12053e-07	down
C7	-1.02191	1.5135e-07	6.18636e-07	down
FST	-0.642729	1.62278e-07	6.61502e-07	down
S100A4	-0.838479	1.64547e-07	6.70193e-07	down
SEL1L3	0.587915	1.69177e-07	6.88476e-07	up
IGFBP2	0.627039	1.73639e-07	7.05755e-07	up
ABLIM1	-0.59996	1.74435e-07	7.08547e-07	down
LRATD1	0.783898	1.83311e-07	7.42903e-07	up
PRRX1	-0.623144	1.91718e-07	7.75045e-07	down
KRT19	-1.04001	1.93795e-07	7.82954e-07	down
MXRA5	-0.620281	1.94893e-07	7.86903e-07	down
TRPM2	0.63553	2.05662e-07	8.28024e-07	up
ITM2A	-0.812182	2.11598e-07	8.49959e-07	down
SAT1	0.598402	2.12242e-07	8.52371e-07	up
H2AC7	0.697182	2.17246e-07	8.71712e-07	up
KCNS3	0.61782	2.20578e-07	8.83851e-07	up
SYCE1L	0.841642	2.30639e-07	9.21328e-07	up
KCNG3	0.596042	2.36494e-07	9.4356e-07	up
SLC4A4	1.11026	2.36815e-07	9.44648e-07	up
TMSB10	0.679581	2.38996e-07	9.52377e-07	up
FN1	-0.871443	2.40528e-07	9.58089e-07	down
BMPR1B	0.627366	2.56925e-07	1.02049e-06	up
KLK1	-0.601139	2.60261e-07	1.03353e-06	down
FOXF2	-0.739793	2.65291e-07	1.05221e-06	down
VAMP5	-0.627416	2.72122e-07	1.07822e-06	down
RARRES2	-0.825128	2.92813e-07	1.15669e-06	down
C4A	0.726675	2.94639e-07	1.16259e-06	up
ELFN2	0.646778	2.95139e-07	1.16399e-06	up
FBP1	0.71311	2.98099e-07	1.17472e-06	up
CDO1	-1.0228	3.08553e-07	1.21371e-06	down
DHCR24	0.718392	3.36069e-07	1.3148e-06	up
SERPINA11	1.0075	3.69579e-07	1.43784e-06	up
SLC7A5	-0.694035	3.71822e-07	1.4457e-06	down
ODC1	0.663966	3.9098e-07	1.51537e-06	up
FGL2	-0.591735	4.19506e-07	1.61791e-06	down
FGFBP1	-0.618926	4.25484e-07	1.63967e-06	down
CXCL12	-0.629854	4.36983e-07	1.681e-06	down
H2BC5	0.658824	4.37105e-07	1.68114e-06	up
H2BC4	0.939155	4.51672e-07	1.73371e-06	up
FAM240C	-0.592916	4.51751e-07	1.73371e-06	down
PER1	-0.697531	4.5858e-07	1.7575e-06	down
CSRP2	-0.655807	4.60801e-07	1.76567e-06	down
HBA2	-0.724342	4.75823e-07	1.82037e-06	down
PRKG2	-0.681141	4.88464e-07	1.86617e-06	down
MICAL2	0.590484	5.17438e-07	1.97032e-06	up
SLC15A2	-0.826867	5.35985e-07	2.03658e-06	down
TMEM45B	1.00888	5.57006e-07	2.11316e-06	up
ERVH48-1	1.03278	5.64802e-07	2.14107e-06	up
CRISPLD2	-0.665443	5.77249e-07	2.18459e-06	down
MESP1	1.05487	5.83583e-07	2.20628e-06	up
H2BC7	0.826515	5.97716e-07	2.25535e-06	up
COCH	-0.756982	6.59303e-07	2.47435e-06	down
PDLIM3	-0.689681	6.68049e-07	2.5038e-06	down
SIK1B	-0.655844	7.17946e-07	2.68156e-06	down
VANGL2	-0.653627	7.2856e-07	2.71964e-06	down
COL9A2	1.24104	7.60829e-07	2.83306e-06	up
NUSAP1	0.586946	7.65449e-07	2.84972e-06	up
CHGB	-0.768566	8.08244e-07	2.99762e-06	down
CBR3	0.701863	8.48944e-07	3.13666e-06	up
ALDH3B2	0.950448	8.73106e-07	3.21863e-06	up
LAMA3	-0.610668	8.91896e-07	3.28047e-06	down
CFD	-0.964163	9.35672e-07	3.43373e-06	down
H3C6	0.588488	9.57989e-07	3.51233e-06	up
C19orf33	-1.00574	9.71931e-07	3.56144e-06	down
SLC7A4	-0.805302	1.08473e-06	3.95694e-06	down
SAMD11	-0.592018	1.13288e-06	4.11798e-06	down
RARRES1	-0.969844	1.13992e-06	4.14127e-06	down
GEM	-0.725885	1.16208e-06	4.21628e-06	down
ATP8A2	0.691277	1.18581e-06	4.2968e-06	up
CD177	-1.6144	1.27076e-06	4.58931e-06	down
INSIG1	-0.620798	1.31219e-06	4.72756e-06	down
APOL1	-0.655918	1.33352e-06	4.79912e-06	down
OLFML3	-0.674146	1.37654e-06	4.94663e-06	down
BTG2	-0.779607	1.43174e-06	5.12614e-06	down
GABRP	-0.83545	1.44984e-06	5.18619e-06	down
CDK19	0.784457	1.45176e-06	5.19117e-06	up
H1-2	0.864122	1.47637e-06	5.26856e-06	up
CACNA2D1	-0.590169	1.55863e-06	5.5348e-06	down
CXCL11	0.78427	1.65048e-06	5.84505e-06	up
EIF4EBP1	0.655383	1.67168e-06	5.91584e-06	up
SDC2	-0.599149	1.7412e-06	6.14517e-06	down
ALOX15	0.782254	1.77778e-06	6.26858e-06	up
OLFM4	-1.73318	1.80224e-06	6.35254e-06	down
MMP2	-0.681767	1.91229e-06	6.72104e-06	down
PLA2G2A	1.69145	1.99786e-06	7.00164e-06	up
SFTPA2	1.21834	2.15681e-06	7.52495e-06	up
PLEKHS1	0.669937	2.26696e-06	7.89234e-06	up
RAMP1	0.835671	2.36264e-06	8.21453e-06	up
CST4	-0.716145	2.47553e-06	8.58024e-06	down
COL6A1	-0.638354	2.52159e-06	8.72442e-06	down
TG	-0.597895	2.65739e-06	9.15859e-06	down
CHI3L1	0.612174	2.67223e-06	9.20487e-06	up
HSPG2	-0.717065	2.82156e-06	9.68853e-06	down
C4B	0.697732	2.82622e-06	9.70281e-06	up
SSTR1	0.854856	3.04816e-06	1.04263e-05	up
ACTA1	-1.32327	3.05447e-06	1.04461e-05	down
PDIA2	0.677489	3.12495e-06	1.06665e-05	up
IGFBP6	-0.825174	3.1557e-06	1.07527e-05	down
DKK1	-0.747229	3.41156e-06	1.15761e-05	down
ANGPTL2	-0.618025	3.44302e-06	1.16768e-05	down
CLDN7	0.711657	3.48878e-06	1.18217e-05	up
KLF10	-0.665152	3.54987e-06	1.2012e-05	down
PLPP1	0.633438	3.61197e-06	1.22039e-05	up
CA3	-1.06438	3.71964e-06	1.25344e-05	down
UGT2B4	0.83719	4.0828e-06	1.36662e-05	up
MON1B	0.849641	4.11931e-06	1.37837e-05	up
WNT2	-0.6217	4.20229e-06	1.40565e-05	down
B3GNT6	1.05292	4.44246e-06	1.48092e-05	up
CYBRD1	-0.602399	4.54854e-06	1.51473e-05	down
PODN	-0.634982	4.60059e-06	1.53102e-05	down
CAVIN3	-0.596427	4.98305e-06	1.65043e-05	down
EPHA3	-0.677859	5.03838e-06	1.66734e-05	down
GADD45G	0.813402	5.08933e-06	1.68249e-05	up
PAGE4	-0.896167	5.09272e-06	1.68333e-05	down
KRT17	-1.25788	5.16761e-06	1.70606e-05	down
ERG	1.35214	5.39687e-06	1.77665e-05	up
ZFP36L2	-0.587397	5.57261e-06	1.82926e-05	down
CHIT1	0.619692	5.63447e-06	1.84864e-05	up
TMPRSS2	0.768722	5.66101e-06	1.85641e-05	up
MIPEP	0.932895	5.70462e-06	1.87008e-05	up
CDH3	-0.619472	5.99606e-06	1.95806e-05	down
S100A8	-0.598644	5.99807e-06	1.95839e-05	down
APCDD1	-0.608101	6.10439e-06	1.99111e-05	down
FBLN1	-0.748683	6.12429e-06	1.99694e-05	down
PCDHB2	0.630682	7.0707e-06	2.28683e-05	up
ISG15	0.971694	7.10907e-06	2.2981e-05	up
F5	1.00308	7.90506e-06	2.53611e-05	up
SERPING1	-0.622056	8.36268e-06	2.67546e-05	down
DNAJC12	0.596051	9.14663e-06	2.90675e-05	up
SELENOP	-0.669188	9.87422e-06	3.12425e-05	down
UNC5A	0.881913	1.09162e-05	3.43947e-05	up
C19orf81	0.640274	1.10697e-05	3.48558e-05	up
NR4A3	-0.777049	1.11635e-05	3.51285e-05	down
LPL	-0.607141	1.26849e-05	3.96287e-05	down
CACNA1H	-0.611777	1.437e-05	4.46147e-05	down
RASL11A	-0.611889	1.50526e-05	4.6564e-05	down
COL6A3	-0.615936	1.58334e-05	4.88245e-05	down
COL2A1	1.26149	1.62618e-05	5.00745e-05	up
HLA-DMB	0.890245	1.71519e-05	5.26413e-05	up
MYOZ1	-0.61719	1.72131e-05	5.28123e-05	down
TNC	-0.649211	1.7216e-05	5.28129e-05	down
CXCL10	0.812933	1.82452e-05	5.57514e-05	up
KCNN2	0.757447	1.95192e-05	5.94212e-05	up
DNAH8	0.664345	1.99112e-05	6.04735e-05	up
SRARP	1.03989	2.00322e-05	6.08029e-05	up
CLSTN2	-0.594883	2.11309e-05	6.38898e-05	down
NCALD	0.593942	2.14296e-05	6.47029e-05	up
H2BC21	0.585885	2.21335e-05	6.66941e-05	up
RGS2	-0.645032	2.35811e-05	7.08483e-05	down
CCDC85B	0.595025	2.56306e-05	7.66173e-05	up
EMILIN1	-0.620289	2.71775e-05	8.09443e-05	down
S100A2	-0.789435	2.8469e-05	8.45533e-05	down
MUC6	-1.05888	2.93026e-05	8.68235e-05	down
SLC38A11	0.787768	3.50045e-05	0.000102413	up
CITED1	-0.735353	3.59431e-05	0.000104955	down
CCL21	-0.809827	3.68535e-05	0.000107405	down
TFCP2L1	-0.619453	3.93733e-05	0.000114221	down
SEMA3C	-0.618903	4.38953e-05	0.0001264	down
LTF	-1.75089	4.65532e-05	0.000133464	down
ANO7	0.854062	4.67538e-05	0.000134	up
PLA1A	0.895372	4.70827e-05	0.000134903	up
SMIM22	0.963668	4.9423e-05	0.000141173	up
ELOVL2	0.730086	5.26972e-05	0.000149781	up
DUSP1	-0.67156	5.54626e-05	0.00015707	down
SCNN1G	-0.686102	5.7203e-05	0.000161671	down
ANKRD34B	0.732399	5.76568e-05	0.000162836	up
PLA2G4D	-0.588332	5.80395e-05	0.000163822	down
CHRNA2	0.831435	6.18165e-05	0.000173705	up
SMIM31	0.800646	6.34075e-05	0.000177792	up
PTN	-0.870435	6.40496e-05	0.000179382	down
S100A9	-0.788672	6.43841e-05	0.000180194	down
DUSP5	-0.718987	6.52731e-05	0.0001825	down
CLDN1	-0.705319	6.76942e-05	0.000188729	down
COL14A1	-0.59772	6.84375e-05	0.000190692	down
SMIM32	0.661144	7.36182e-05	0.00020405	up
SOX14	0.693902	7.79801e-05	0.000215346	up
ANGPTL4	-0.67593	8.1123e-05	0.000223425	down
WFDC12	-0.661027	8.24032e-05	0.000226728	down
CLGN	0.610595	8.4794e-05	0.000232879	up
NUPR2	-0.662129	9.24984e-05	0.000252866	down
NEFH	-1.45169	0.000101174	0.000274523	down
SLC22A3	-0.816516	0.000134052	0.000355952	down
SERPINB11	-0.94848	0.000134447	0.000356759	down
BHLHA15	0.692806	0.000139257	0.000368672	up
OAS2	0.594429	0.000147378	0.000388697	up
CNTNAP2	0.646115	0.000154827	0.000407275	up
CXCL14	0.869624	0.000168438	0.000440495	up
APOD	0.6753	0.000169421	0.000442887	up
PHYHD1	-0.749416	0.00017418	0.000453933	down
NNMT	0.590151	0.000219874	0.000563839	up
HSPA6	-0.594445	0.000263204	0.000668374	down
PTK6	0.598404	0.000332187	0.000829851	up
GRIN3A	0.673632	0.000347983	0.000866101	up
EHF	-0.622112	0.000354241	0.000880443	down
AGR3	0.808243	0.000384566	0.000950254	up
GSTA1	-0.80895	0.000391315	0.000965343	down
BST2	-0.60477	0.000393382	0.000969951	down
SPP1	0.631725	0.000550651	0.0013261	up
OR51E1	1.02299	0.000571496	0.00137055	up
ACTN2	-0.600977	0.000573194	0.00137412	down
ALDH1A1	-0.719494	0.000684527	0.00162073	down
CYP4F8	-0.765543	0.000716914	0.00168882	down
MYBPC1	0.796712	0.000742976	0.00174491	up
LRRN1	0.70078	0.000790723	0.00184797	up
VSIG2	-0.881605	0.000814576	0.00189912	down
KLK12	0.794467	0.000820568	0.00191247	up
ELAPOR1	0.628887	0.000842889	0.00195842	up
ATF3	-0.812299	0.000899369	0.00207951	down
KLK14	0.637822	0.00098566	0.0022611	up
CXCL9	0.605985	0.00103403	0.00236208	up
TMEFF2	0.966578	0.00104832	0.00239276	up
TGM4	-1.34015	0.00118788	0.00269057	down
FOS	-0.86263	0.00123818	0.00279477	down
TNNC1	-0.774451	0.00135695	0.00304072	down
SCUBE2	-0.695707	0.00160017	0.00353986	down
SOCS3	-0.73452	0.00164351	0.00362917	down
P3H2	-0.713921	0.00169481	0.00373065	down
SELE	-0.637402	0.00172455	0.00379056	down
C15orf48	0.870895	0.00208601	0.00452448	up
CACNG4	-0.618044	0.00244405	0.0052325	down
FAM3D	-0.693318	0.00286272	0.00604472	down
SPINK1	0.822236	0.00291334	0.0061443	up
KCNC2	0.607839	0.00397219	0.00818484	up
IFI6	0.644628	0.00419986	0.00861309	up
EEF1A2	0.711369	0.00540919	0.0108539	up
CDC42EP5	-0.610239	0.00541386	0.0108611	down
MYL1	-0.708081	0.0056676	0.0113306	down
EGR1	-0.673059	0.00736409	0.0144096	down
PSCA	-0.935839	0.0120476	0.0224703	down
LCN2	-0.745252	0.0132359	0.0245004	down
MYH7	-0.6394	0.0154245	0.0281961	down
MYL2	-0.69151	0.0171032	0.0309841	down
FOSB	-0.729655	0.0205621	0.0366119	down
NPY	1.10716	0.0246159	0.0431264	up

## Sheet: OS_degs_res
gene	log2FC	pvalue	adjusted_pvalue	sig
GNAO1	-1.24224	6.9297e-46	9.02616e-43	down
PYCR1	1.46106	1.52306e-44	1.56618e-41	up
PPARGC1A	-0.766985	1.0667e-43	9.47325e-41	down
ACOX2	-1.23812	9.14544e-33	1.5674e-30	down
DUOX1	-1.38099	1.31998e-32	2.18558e-30	down
GPX2	-1.94906	9.15107e-32	1.33428e-29	down
SCARA3	-1.56442	3.24195e-30	3.77031e-28	down
CBX8	0.722062	2.376e-29	2.33278e-27	up
PTGS1	-1.59011	8.60818e-29	7.78641e-27	down
GSTP1	-1.97032	3.56748e-28	2.90422e-26	down
CAMKK2	1.46778	3.97027e-27	2.65655e-25	up
PENK	-1.3399	4.83889e-27	3.16195e-25	down
SLC8A1	-0.9138	2.79515e-26	1.62535e-24	down
TPM1	-1.31409	1.29852e-25	6.72386e-24	down
STK26	-1.05194	2.43433e-25	1.20715e-23	down
CRYAB	-1.77078	5.21302e-25	2.46615e-23	down
EZH2	0.69581	1.45673e-23	5.5589e-22	up
ALAD	-0.866735	2.4442e-22	7.82866e-21	down
PRNP	-0.829093	3.47647e-22	1.08851e-20	down
MSRB3	-1.42863	3.61978e-22	1.13157e-20	down
PDGFD	-0.981883	3.9911e-22	1.23775e-20	down
TP53INP1	1.07201	7.81553e-22	2.29969e-20	up
DUOX2	-0.870665	9.45665e-22	2.72513e-20	down
UCN	0.973514	2.1468e-21	5.86632e-20	up
TMEM161A	0.602822	4.38119e-21	1.14745e-19	up
TXN	0.757658	4.56911e-21	1.19028e-19	up
AIFM2	-0.604535	2.29804e-20	5.3643e-19	down
ANKZF1	0.670763	2.91009e-20	6.6891e-19	up
P4HB	0.709625	3.56712e-20	8.07584e-19	up
EEF2	0.628205	4.07077e-20	9.07929e-19	up
PSIP1	-0.617938	9.89877e-20	2.05092e-18	down
PNKP	0.646735	3.94959e-19	7.50653e-18	up
PDK2	-0.61324	6.38015e-19	1.17711e-17	down
NNT	-0.751031	2.33553e-18	3.96452e-17	down
RBPMS	-1.04213	1.02622e-17	1.59003e-16	down
GSTM2	-0.845623	2.2787e-17	3.35756e-16	down
APOE	1.55466	3.22945e-17	4.70522e-16	up
OXR1	-0.669193	3.49573e-17	5.07427e-16	down
GPX8	-0.83903	4.16253e-17	5.97996e-16	down
GPX3	-1.38385	5.04117e-17	7.12695e-16	down
BCL2	-0.893984	5.52868e-17	7.78798e-16	down
RHOB	-1.12433	1.69602e-16	2.26809e-15	down
PDLIM1	-1.02274	1.72487e-16	2.30194e-15	down
FOXO1	-0.629	2.15128e-16	2.83423e-15	down
RACK1	0.594178	2.28077e-16	2.99877e-15	up
PTGS2	-1.65374	1.02528e-15	1.2373e-14	down
NFE2L2	-0.601147	2.17549e-15	2.52854e-14	down
RNF112	-0.723077	3.66022e-15	4.12181e-14	down
SCGB1A1	-2.39657	4.29811e-15	4.79317e-14	down
GPX7	-0.887856	9.4143e-15	1.00074e-13	down
PRDX4	0.677772	2.98053e-14	2.9787e-13	up
MET	-0.859452	5.15853e-14	4.9969e-13	down
SLC7A11	0.620518	2.22826e-13	1.96995e-12	up
ETV5	-0.794183	8.51654e-13	6.99144e-12	down
ANXA1	-1.04104	1.2709e-12	1.02607e-11	down
HBB	-1.14509	3.12826e-12	2.41009e-11	down
NEIL1	0.662322	6.32947e-12	4.65783e-11	up
BMP7	-0.892649	1.3573e-11	9.57017e-11	down
NME2	0.596598	5.69718e-11	3.6956e-10	up
CCNA2	0.602386	7.19947e-11	4.61645e-10	up
CD38	-1.53812	9.327e-11	5.88601e-10	down
MMP14	-0.77295	3.16181e-10	1.86015e-09	down
TXNRD2	0.629696	7.78593e-10	4.35878e-09	up
CYBA	-0.745895	1.49672e-09	8.00739e-09	down
GPR37	0.597818	1.96001e-09	1.03054e-08	up
TXNIP	-0.624504	2.76244e-09	1.42183e-08	down
HSPB1	-0.939485	3.62509e-09	1.83252e-08	down
MMP9	1.00121	6.1879e-09	3.04609e-08	up
PTGES	-0.884914	8.94763e-09	4.30376e-08	down
PXDN	0.65698	1.05093e-08	5.01661e-08	up
EPAS1	-0.654485	1.21708e-08	5.7563e-08	down
AXL	-0.626879	1.27552e-08	6.01378e-08	down
SDC1	-0.89018	2.70252e-08	1.22142e-07	down
DAPK1	0.6057	6.49563e-08	2.78865e-07	up
TRPM2	0.63553	2.05662e-07	8.28024e-07	up
DHCR24	0.718392	3.36069e-07	1.3148e-06	up
HBA2	-0.724342	4.75823e-07	1.82037e-06	down
MMP2	-0.681767	1.91229e-06	6.72104e-06	down
CA3	-1.06438	3.71964e-06	1.25344e-05	down
PAGE4	-0.896167	5.09272e-06	1.68333e-05	down
SELENOP	-0.669188	9.87422e-06	3.12425e-05	down
NR4A3	-0.777049	1.11635e-05	3.51285e-05	down
DUSP1	-0.67156	5.54626e-05	0.00015707	down
S100A9	-0.788672	6.43841e-05	0.000180194	down
APOD	0.6753	0.000169421	0.000442887	up
GSTA1	-0.80895	0.000391315	0.000965343	down
FOS	-0.86263	0.00123818	0.00279477	down
KCNC2	0.607839	0.00397219	0.00818484	up

## Sheet: Metabolic_degs_res
gene	log2FC	pvalue	adjusted_pvalue	sig
PODXL2	1.67568	6.12076e-39	2.91676e-36	up
GSTM3	-1.73981	1.0425e-38	4.52629e-36	down
CYP4B1	-1.891	9.05697e-30	9.77652e-28	down
GSTM4	-0.956444	4.8026e-29	4.53301e-27	down
PTGS1	-1.59011	8.60818e-29	7.78641e-27	down
ME1	-1.1974	1.21225e-28	1.05737e-26	down
LYVE1	-0.91215	2.36021e-28	1.97913e-26	down
PPP1R3C	-1.44462	2.41243e-28	2.01428e-26	down
GSTP1	-1.97032	3.56748e-28	2.90422e-26	down
FUT3	-0.762158	4.07514e-28	3.26312e-26	down
B3GALT6	0.866804	4.67771e-28	3.71517e-26	up
AKR1B1	-1.56044	1.23604e-27	9.18245e-26	down
ACSS1	0.811065	1.19259e-26	7.39709e-25	up
CYP4F22	-1.09005	1.31037e-26	8.1019e-25	down
NUP210	1.05787	2.50468e-26	1.46956e-24	up
CALM1	-0.771062	6.15714e-26	3.39825e-24	down
B3GALT2	-0.856065	1.83823e-24	7.91372e-23	down
GSTM5	-1.02173	5.43062e-24	2.20245e-22	down
MAT2B	-0.626915	2.8729e-23	1.04917e-21	down
SLC25A10	0.997858	4.73329e-23	1.67534e-21	up
CYP3A5	-1.19019	6.52268e-23	2.23579e-21	down
ACSF2	-1.0903	1.57495e-22	5.21547e-21	down
GGCT	0.974944	8.61617e-22	2.50883e-20	up
CHST2	-1.10922	1.92112e-21	5.29405e-20	down
PDK4	-1.92491	1.54409e-20	3.69711e-19	down
CHST3	-0.915455	2.23084e-19	4.4205e-18	down
PDK2	-0.61324	6.38015e-19	1.17711e-17	down
NNT	-0.751031	2.33553e-18	3.96452e-17	down
MPC2	0.908415	2.58446e-18	4.35303e-17	up
CHST11	-0.704133	1.28677e-17	1.96875e-16	down
GSTM2	-0.845623	2.2787e-17	3.35756e-16	down
B3GAT3	0.630435	3.23718e-17	4.71296e-16	up
GLYATL1	1.62627	4.98307e-17	7.04991e-16	up
SLC37A1	0.840669	8.86318e-17	1.22381e-15	up
IDUA	0.730838	1.43708e-16	1.93506e-15	up
GGT6	-1.14194	1.46363e-16	1.96674e-15	down
ENO2	-0.767492	2.56785e-16	3.35366e-15	down
ACSM1	2.23049	2.98346e-16	3.85522e-15	up
ACAA2	-0.744345	4.76442e-15	5.28005e-14	down
PYGM	-1.09923	5.28648e-15	5.82885e-14	down
CHST15	-0.775259	6.39981e-15	7.00109e-14	down
ABO	-0.899332	1.17636e-14	1.23968e-13	down
PGLS	0.619334	1.5219e-14	1.57745e-13	up
CES1	-1.27181	1.78755e-14	1.83527e-13	down
PTGIS	-1.11178	2.01453e-14	2.05858e-13	down
B3GAT1	1.00313	4.19571e-14	4.12561e-13	up
CYP27A1	-1.46697	6.99354e-14	6.65238e-13	down
GSTM1	-1.72245	8.55933e-14	8.04001e-13	down
FUT2	-0.633705	3.85496e-13	3.31652e-12	down
ALDOC	-0.626654	1.56872e-12	1.25152e-11	down
AHR	-0.845096	1.58917e-12	1.26628e-11	down
ALDH2	-0.928865	2.43139e-12	1.89942e-11	down
UST	-0.620069	4.66601e-12	3.50903e-11	down
PYGL	-0.865445	7.45075e-12	5.42979e-11	down
PAOX	0.739714	2.062e-11	1.42057e-10	up
PFKFB3	-0.726433	2.08856e-11	1.43583e-10	down
D2HGDH	0.587687	3.23578e-11	2.16583e-10	up
ST3GAL1	-0.634723	4.26948e-11	2.80866e-10	down
AOC3	-0.972077	5.14064e-11	3.34905e-10	down
OGN	-1.11383	5.54145e-11	3.60056e-10	down
CSPG4	-0.740411	6.45151e-11	4.15594e-10	down
BGN	0.99823	6.79665e-11	4.36963e-10	up
MAOB	-1.28104	1.1279e-10	7.04056e-10	down
CYP2J2	0.952584	3.80385e-10	2.21321e-09	up
DCN	-0.996264	8.14491e-10	4.54283e-09	down
AOC1	-1.52672	1.12124e-09	6.10726e-09	down
B3GNT3	-0.832549	1.31973e-09	7.10718e-09	down
DCXR	0.756205	2.30208e-09	1.19718e-08	up
PRELP	-0.886053	4.89905e-09	2.4449e-08	down
LDHB	-0.889725	1.16575e-08	5.52962e-08	down
HK2	0.656887	2.44289e-08	1.11257e-07	up
SDC1	-0.89018	2.70252e-08	1.22142e-07	down
FBP1	0.71311	2.98099e-07	1.17472e-06	up
CBR3	0.701863	8.48944e-07	3.13666e-06	up
SDC2	-0.599149	1.7412e-06	6.14517e-06	down
HSPG2	-0.717065	2.82156e-06	9.68853e-06	down
UGT2B4	0.83719	4.0828e-06	1.36662e-05	up
NNMT	0.590151	0.000219874	0.000563839	up
GSTA1	-0.80895	0.000391315	0.000965343	down
ALDH1A1	-0.719494	0.000684527	0.00162073	down
CYP4F8	-0.765543	0.000716914	0.00168882	down

## Sheet: gsva_OS_res
sample	CELL_DEATH_IN_RESPONSE_TO_OXIDATIVE_STRESS	CELLULAR_OXIDANT_DETOXIFICATION	RESPONSE_TO_OXIDATIVE_STRESS	group	Tissue
TCGA-HC-8259-11A	1.68882	1.48784	1.63619	Normal	Normal
TCGA-HC-7742-11A	1.76504	1.46513	1.66785	Normal	Normal
TCGA-HC-8260-11A	1.683	1.37527	1.60829	Normal	Normal
TCGA-EJ-7793-11A	1.89855	1.55764	1.75971	Normal	Normal
TCGA-EJ-7784-11A	1.75244	1.5445	1.74502	Normal	Normal
TCGA-HC-7752-11A	1.75624	1.57204	1.75318	Normal	Normal
TCGA-HC-7747-11A	1.75998	1.50525	1.76068	Normal	Normal
TCGA-G9-6351-11A	1.7117	1.34722	1.64931	Normal	Normal
TCGA-CH-5769-11A	1.75095	1.44539	1.71983	Normal	Normal
TCGA-EJ-7328-11A	1.90738	1.57492	1.8337	Normal	Normal
TCGA-EJ-7792-11A	1.8164	1.57754	1.76611	Normal	Normal
TCGA-EJ-7123-11A	1.93044	1.40161	1.79422	Normal	Normal
TCGA-G9-6342-11A	1.74129	1.53555	1.66443	Normal	Normal
TCGA-EJ-7783-11A	1.87609	1.58791	1.84187	Normal	Normal
TCGA-G9-6384-11A	1.81962	1.40716	1.71001	Normal	Normal
TCGA-EJ-7125-11A	1.74825	1.68122	1.70077	Normal	Normal
TCGA-HC-7819-11A	1.7275	1.4567	1.64806	Normal	Normal
TCGA-HC-7740-11A	1.82464	1.62777	1.7791	Normal	Normal
TCGA-EJ-7327-11A	1.76571	1.3673	1.61087	Normal	Normal
TCGA-G9-6333-11A	1.74675	1.62984	1.7494	Normal	Normal
TCGA-J4-A83J-11A	1.76488	1.62472	1.81006	Normal	Normal
TCGA-G9-6348-11A	1.74781	1.49557	1.70588	Normal	Normal
TCGA-EJ-7330-11A	1.89591	1.74491	1.88804	Normal	Normal
TCGA-CH-5768-11A	1.73254	1.40299	1.60843	Normal	Normal
TCGA-EJ-7315-11A	1.86909	1.51225	1.82763	Normal	Normal
TCGA-EJ-7782-11A	1.73673	1.6474	1.75771	Normal	Normal
TCGA-EJ-7331-11A	1.86548	1.56987	1.78735	Normal	Normal
TCGA-EJ-7794-11A	1.83436	1.5046	1.81469	Normal	Normal
TCGA-G9-6496-11A	1.73384	1.58482	1.73497	Normal	Normal
TCGA-HC-7745-11A	1.80595	1.53708	1.78743	Normal	Normal
TCGA-EJ-7789-11A	1.68111	1.6444	1.7182	Normal	Normal
TCGA-EJ-7115-11A	1.77834	1.4882	1.69697	Normal	Normal
TCGA-CH-5761-11A	1.74286	1.36976	1.66669	Normal	Normal
TCGA-EJ-A8FO-11A	1.78867	1.65732	1.81295	Normal	Normal
TCGA-HC-8262-11A	1.8115	1.64803	1.81829	Normal	Normal
TCGA-EJ-7314-11A	1.91453	1.5317	1.81749	Normal	Normal
TCGA-G9-6363-11A	1.79513	1.49628	1.69955	Normal	Normal
TCGA-EJ-7797-11A	1.73859	1.5694	1.73627	Normal	Normal
TCGA-HC-7737-11A	1.7523	1.62793	1.766	Normal	Normal
TCGA-EJ-7781-11A	1.91925	1.54148	1.83504	Normal	Normal
TCGA-HC-7738-11A	1.82758	1.45955	1.78294	Normal	Normal
TCGA-EJ-7785-11A	1.78669	1.56837	1.74323	Normal	Normal
TCGA-EJ-7317-11A	1.74772	1.38687	1.64784	Normal	Normal
TCGA-G9-6365-11A	1.70581	1.41641	1.66475	Normal	Normal
TCGA-G9-6356-11A	1.69665	1.59159	1.72002	Normal	Normal
TCGA-EJ-7786-11A	1.92427	1.59637	1.83376	Normal	Normal
TCGA-G9-6362-11A	1.67957	1.26469	1.64413	Normal	Normal
TCGA-HC-7211-11A	1.79623	1.50981	1.74381	Normal	Normal
TCGA-HC-8258-11A	1.74322	1.59484	1.74812	Normal	Normal
TCGA-EJ-7321-11A	1.70008	1.4599	1.71436	Normal	Normal
TCGA-G9-6499-11A	1.84534	1.31182	1.65805	Normal	Normal
TCGA-2A-A8VL-01A	1.65469	1.34037	1.57522	Tumor	Tumor
TCGA-2A-A8VO-01A	1.72375	1.35626	1.62331	Tumor	Tumor
TCGA-2A-A8VT-01A	1.62071	0.965659	1.49558	Tumor	Tumor
TCGA-2A-A8VV-01A	1.69814	1.34051	1.58733	Tumor	Tumor
TCGA-2A-A8VX-01A	1.64897	1.21691	1.51003	Tumor	Tumor
TCGA-2A-A8W1-01A	1.74603	1.22311	1.50217	Tumor	Tumor
TCGA-2A-A8W3-01A	1.75414	1.12128	1.60019	Tumor	Tumor
TCGA-2A-AAYF-01A	1.75093	1.34408	1.56265	Tumor	Tumor
TCGA-2A-AAYO-01A	1.71738	1.41474	1.63547	Tumor	Tumor
TCGA-2A-AAYU-01A	1.64847	1.22063	1.56753	Tumor	Tumor
TCGA-4L-AA1F-01A	1.65508	1.60923	1.86667	Tumor	Tumor
TCGA-CH-5737-01A	1.7815	1.45914	1.673	Tumor	Tumor
TCGA-CH-5738-01A	1.88642	1.55076	1.80963	Tumor	Tumor
TCGA-CH-5739-01A	1.80355	1.24218	1.66218	Tumor	Tumor
TCGA-CH-5740-01A	1.76254	1.41292	1.65054	Tumor	Tumor
TCGA-CH-5741-01A	1.64673	1.43602	1.55468	Tumor	Tumor
TCGA-CH-5743-01A	1.89441	1.57317	1.80898	Tumor	Tumor
TCGA-CH-5744-01A	1.68135	1.38043	1.6583	Tumor	Tumor
TCGA-CH-5745-01A	1.73803	1.35081	1.65604	Tumor	Tumor
TCGA-CH-5746-01A	1.73614	1.29599	1.62529	Tumor	Tumor
TCGA-CH-5748-01A	1.81616	1.19566	1.5689	Tumor	Tumor
TCGA-CH-5750-01A	1.79071	1.27879	1.64245	Tumor	Tumor
TCGA-CH-5751-01A	1.72538	0.930436	1.63044	Tumor	Tumor
TCGA-CH-5752-01A	1.76745	1.17814	1.61409	Tumor	Tumor
TCGA-CH-5753-01A	1.83355	1.26913	1.66451	Tumor	Tumor
TCGA-CH-5754-01A	1.66652	1.33674	1.7006	Tumor	Tumor
TCGA-CH-5761-01A	1.74382	1.16017	1.61696	Tumor	Tumor
TCGA-CH-5762-01A	1.8444	1.35731	1.72839	Tumor	Tumor
TCGA-CH-5763-01A	1.87954	1.38647	1.74843	Tumor	Tumor
TCGA-CH-5764-01A	1.76168	1.25353	1.64638	Tumor	Tumor
TCGA-CH-5765-01A	1.76758	1.19713	1.58839	Tumor	Tumor
TCGA-CH-5766-01A	1.74144	1.37462	1.68791	Tumor	Tumor
TCGA-CH-5767-01A	1.83456	1.20473	1.58358	Tumor	Tumor
TCGA-CH-5768-01A	1.76665	1.35213	1.6345	Tumor	Tumor
TCGA-CH-5769-01A	1.76876	1.48029	1.72967	Tumor	Tumor
TCGA-CH-5771-01A	1.77082	1.43386	1.73712	Tumor	Tumor
TCGA-CH-5772-01A	1.80019	1.32205	1.62686	Tumor	Tumor
TCGA-CH-5788-01A	1.75222	1.09228	1.53319	Tumor	Tumor
TCGA-CH-5789-01A	1.87129	1.42765	1.71732	Tumor	Tumor
TCGA-CH-5790-01A	1.66486	1.27391	1.62432	Tumor	Tumor
TCGA-CH-5791-01A	1.69873	1.31782	1.60704	Tumor	Tumor
TCGA-CH-5792-01A	1.79955	1.45016	1.73317	Tumor	Tumor
TCGA-CH-5794-01A	1.74702	1.33692	1.66737	Tumor	Tumor
TCGA-EJ-5494-01A	1.6861	1.38355	1.6923	Tumor	Tumor
TCGA-EJ-5495-01A	1.78271	1.34354	1.7325	Tumor	Tumor
TCGA-EJ-5496-01A	1.76669	1.26533	1.61555	Tumor	Tumor
TCGA-EJ-5497-01A	1.76429	1.35484	1.66325	Tumor	Tumor
TCGA-EJ-5498-01A	1.81941	1.49062	1.77538	Tumor	Tumor
TCGA-EJ-5499-01A	1.78802	1.36364	1.6767	Tumor	Tumor
TCGA-EJ-5501-01A	1.67535	1.2745	1.60818	Tumor	Tumor
TCGA-EJ-5502-01A	1.73379	1.40839	1.71215	Tumor	Tumor
TCGA-EJ-5503-01A	1.75484	1.40382	1.70899	Tumor	Tumor
TCGA-EJ-5504-01A	1.85509	1.33993	1.64155	Tumor	Tumor
TCGA-EJ-5505-01A	1.76787	1.40697	1.6058	Tumor	Tumor
TCGA-EJ-5506-01A	1.74194	1.35357	1.62533	Tumor	Tumor
TCGA-EJ-5507-01A	1.80353	1.37572	1.64267	Tumor	Tumor
TCGA-EJ-5508-01A	1.79774	1.37423	1.68015	Tumor	Tumor
TCGA-EJ-5509-01A	1.8068	1.34141	1.69421	Tumor	Tumor
TCGA-EJ-5510-01A	1.73538	1.53184	1.68084	Tumor	Tumor
TCGA-EJ-5511-01A	1.62369	1.12793	1.50631	Tumor	Tumor
TCGA-EJ-5512-01A	1.77114	1.37548	1.62383	Tumor	Tumor
TCGA-EJ-5514-01A	1.77683	1.23481	1.64008	Tumor	Tumor
TCGA-EJ-5515-01A	1.79841	1.27237	1.59413	Tumor	Tumor
TCGA-EJ-5516-01A	1.81332	1.4118	1.7267	Tumor	Tumor
TCGA-EJ-5517-01A	1.79733	1.5101	1.64538	Tumor	Tumor
TCGA-EJ-5518-01A	1.70897	1.31499	1.69824	Tumor	Tumor
TCGA-EJ-5519-01A	1.71786	1.16997	1.58091	Tumor	Tumor
TCGA-EJ-5521-01A	1.72088	1.60138	1.66526	Tumor	Tumor
TCGA-EJ-5522-01A	1.75245	1.28956	1.62299	Tumor	Tumor
TCGA-EJ-5524-01A	1.7758	1.26284	1.65342	Tumor	Tumor
TCGA-EJ-5525-01A	1.7588	1.2168	1.68979	Tumor	Tumor
TCGA-EJ-5526-01A	1.80083	1.22441	1.64511	Tumor	Tumor
TCGA-EJ-5527-01A	1.78839	1.35253	1.6779	Tumor	Tumor
TCGA-EJ-5530-01A	1.73623	1.22044	1.60091	Tumor	Tumor
TCGA-EJ-5531-01A	1.84475	1.58311	1.73487	Tumor	Tumor
TCGA-EJ-5532-01A	1.76773	1.28605	1.60069	Tumor	Tumor
TCGA-EJ-5542-01A	1.83672	1.35354	1.63919	Tumor	Tumor
TCGA-EJ-7115-01A	1.78127	1.35324	1.65972	Tumor	Tumor
TCGA-EJ-7123-01A	1.7812	1.23015	1.58647	Tumor	Tumor
TCGA-EJ-7125-01A	1.82764	1.25929	1.70309	Tumor	Tumor
TCGA-EJ-7314-01A	1.81277	1.28767	1.65166	Tumor	Tumor
TCGA-EJ-7315-01A	1.70405	1.15862	1.63752	Tumor	Tumor
TCGA-EJ-7317-01A	1.7667	1.22885	1.57721	Tumor	Tumor
TCGA-EJ-7321-01A	1.69303	1.21465	1.61843	Tumor	Tumor
TCGA-EJ-7327-01A	1.72767	1.26506	1.66648	Tumor	Tumor
TCGA-EJ-7328-01A	1.77132	1.47196	1.72498	Tumor	Tumor
TCGA-EJ-7330-01A	1.76704	1.43876	1.6896	Tumor	Tumor
TCGA-EJ-7331-01A	1.86125	1.37342	1.71018	Tumor	Tumor
TCGA-EJ-7781-01A	1.70096	1.34137	1.63564	Tumor	Tumor
TCGA-EJ-7782-01A	1.70837	1.17577	1.57697	Tumor	Tumor
TCGA-EJ-7783-01A	1.70472	1.3527	1.67067	Tumor	Tumor
TCGA-EJ-7784-01A	1.68881	1.08287	1.54124	Tumor	Tumor
TCGA-EJ-7785-01A	1.76077	1.30639	1.68057	Tumor	Tumor
TCGA-EJ-7786-01A	1.77509	1.31407	1.62865	Tumor	Tumor
TCGA-EJ-7788-01A	1.77721	1.2318	1.62484	Tumor	Tumor
TCGA-EJ-7789-01A	1.79034	1.16224	1.54927	Tumor	Tumor
TCGA-EJ-7791-01A	1.8435	1.46392	1.72624	Tumor	Tumor
TCGA-EJ-7792-01A	1.80392	1.46974	1.73071	Tumor	Tumor
TCGA-EJ-7793-01A	1.7443	1.36927	1.59833	Tumor	Tumor
TCGA-EJ-7794-01A	1.8176	1.40084	1.69535	Tumor	Tumor
TCGA-EJ-7797-01A	1.67168	1.33228	1.64029	Tumor	Tumor
TCGA-EJ-8468-01A	1.80404	1.41977	1.66701	Tumor	Tumor
TCGA-EJ-8469-01A	1.70104	1.00347	1.54388	Tumor	Tumor
TCGA-EJ-8470-01A	1.77982	1.34916	1.70234	Tumor	Tumor
TCGA-EJ-8472-01A	1.64273	1.2607	1.59649	Tumor	Tumor
TCGA-EJ-8474-01A	1.75129	1.19922	1.60205	Tumor	Tumor
TCGA-EJ-A46B-01A	1.70961	1.33163	1.59543	Tumor	Tumor
TCGA-EJ-A46D-01A	1.72509	1.39283	1.64009	Tumor	Tumor
TCGA-EJ-A46E-01A	1.7968	1.39172	1.71094	Tumor	Tumor
TCGA-EJ-A46F-01A	1.42344	1.24153	1.45285	Tumor	Tumor
TCGA-EJ-A46G-01A	1.52314	1.09452	1.55407	Tumor	Tumor
TCGA-EJ-A46H-01A	1.73654	1.59354	1.80783	Tumor	Tumor
TCGA-EJ-A46I-01A	1.72219	1.32016	1.61994	Tumor	Tumor
TCGA-EJ-A65B-01A	1.55134	1.51311	1.59724	Tumor	Tumor
TCGA-EJ-A65D-01A	1.46015	1.08289	1.41251	Tumor	Tumor
TCGA-EJ-A65E-01A	1.68722	1.40342	1.58544	Tumor	Tumor
TCGA-EJ-A65F-01A	1.59285	1.22865	1.5989	Tumor	Tumor
TCGA-EJ-A65G-01A	1.74668	1.23689	1.54387	Tumor	Tumor
TCGA-EJ-A65J-01A	1.81071	1.30034	1.65666	Tumor	Tumor
TCGA-EJ-A65M-01A	1.62556	1.52975	1.62257	Tumor	Tumor
TCGA-EJ-A6RA-01A	1.65878	1.41338	1.60235	Tumor	Tumor
TCGA-EJ-A6RC-01A	1.73256	1.45075	1.71617	Tumor	Tumor
TCGA-EJ-A7NF-01A	1.63794	1.26723	1.55332	Tumor	Tumor
TCGA-EJ-A7NG-01A	1.80783	1.44661	1.67787	Tumor	Tumor
TCGA-EJ-A7NH-01A	1.65643	1.26758	1.59053	Tumor	Tumor
TCGA-EJ-A7NJ-01A	1.70484	1.36542	1.60257	Tumor	Tumor
TCGA-EJ-A7NK-01A	1.67177	1.38706	1.62582	Tumor	Tumor
TCGA-EJ-A7NM-01A	1.68984	1.21429	1.65762	Tumor	Tumor
TCGA-EJ-A7NN-01A	1.70153	1.38063	1.62614	Tumor	Tumor
TCGA-EJ-A8FN-01A	1.70485	1.36866	1.65831	Tumor	Tumor
TCGA-EJ-A8FO-01A	1.70526	1.34886	1.60846	Tumor	Tumor
TCGA-EJ-A8FP-01A	1.73408	1.44645	1.67989	Tumor	Tumor
TCGA-EJ-A8FS-01A	1.68821	1.25481	1.48621	Tumor	Tumor
TCGA-EJ-A8FU-01A	1.78899	1.35732	1.69848	Tumor	Tumor
TCGA-EJ-AB20-01A	1.6757	1.67233	1.76163	Tumor	Tumor
TCGA-EJ-AB27-01A	1.70593	1.39793	1.65288	Tumor	Tumor
TCGA-FC-7708-01A	1.85051	1.38751	1.73628	Tumor	Tumor
TCGA-FC-7961-01A	1.87484	1.3147	1.70879	Tumor	Tumor
TCGA-FC-A4JI-01A	1.78737	1.05156	1.56823	Tumor	Tumor
TCGA-FC-A5OB-01A	1.73048	1.0078	1.44687	Tumor	Tumor
TCGA-FC-A66V-01A	1.57772	1.59108	1.60317	Tumor	Tumor
TCGA-FC-A6HD-01A	1.54789	1.3311	1.50599	Tumor	Tumor
TCGA-FC-A8O0-01A	1.66981	1.45035	1.62333	Tumor	Tumor
TCGA-G9-6329-01A	1.71396	1.53948	1.70823	Tumor	Tumor
TCGA-G9-6332-01A	1.60874	1.28979	1.50209	Tumor	Tumor
TCGA-G9-6333-01A	1.76615	1.43541	1.6519	Tumor	Tumor
TCGA-G9-6336-01A	1.72113	1.47482	1.63795	Tumor	Tumor
TCGA-G9-6338-01A	1.63672	1.48009	1.67357	Tumor	Tumor
TCGA-G9-6339-01A	1.7105	1.44626	1.61488	Tumor	Tumor
TCGA-G9-6342-01A	1.67879	1.47248	1.64277	Tumor	Tumor
TCGA-G9-6343-01A	1.69659	1.33231	1.58521	Tumor	Tumor
TCGA-G9-6347-01A	1.56435	1.52868	1.62195	Tumor	Tumor
TCGA-G9-6348-01A	1.83181	1.53857	1.72225	Tumor	Tumor
TCGA-G9-6351-01A	1.68722	1.35443	1.61597	Tumor	Tumor
TCGA-G9-6353-01A	1.66889	1.35306	1.60615	Tumor	Tumor
TCGA-G9-6354-01A	1.517	1.35823	1.52922	Tumor	Tumor
TCGA-G9-6356-01A	1.74636	1.57422	1.70035	Tumor	Tumor
TCGA-G9-6361-01A	1.70635	1.25216	1.64189	Tumor	Tumor
TCGA-G9-6362-01A	1.5249	1.26002	1.56779	Tumor	Tumor
TCGA-G9-6363-01A	1.80507	1.54185	1.68893	Tumor	Tumor
TCGA-G9-6364-01A	1.73331	1.51028	1.66653	Tumor	Tumor
TCGA-G9-6365-01A	1.72707	1.51062	1.68015	Tumor	Tumor
TCGA-G9-6366-01A	1.58155	1.31012	1.51747	Tumor	Tumor
TCGA-G9-6367-01A	1.74124	1.47098	1.66457	Tumor	Tumor
TCGA-G9-6369-01A	1.7027	1.35268	1.54437	Tumor	Tumor
TCGA-G9-6370-01A	1.77123	1.59075	1.75029	Tumor	Tumor
TCGA-G9-6371-01A	1.73769	1.2557	1.56641	Tumor	Tumor
TCGA-G9-6373-01A	1.68258	1.40329	1.66224	Tumor	Tumor
TCGA-G9-6377-01A	1.73647	1.50371	1.64685	Tumor	Tumor
TCGA-G9-6378-01A	1.68906	1.51423	1.67585	Tumor	Tumor
TCGA-G9-6379-01A	1.48938	1.69147	1.63634	Tumor	Tumor
TCGA-G9-6384-01A	1.77015	1.34383	1.68785	Tumor	Tumor
TCGA-G9-6385-01A	1.7918	1.49957	1.68525	Tumor	Tumor
TCGA-G9-6494-01A	1.69825	1.25223	1.60373	Tumor	Tumor
TCGA-G9-6496-01A	1.53821	1.38786	1.59678	Tumor	Tumor
TCGA-G9-6498-01A	1.77064	1.57031	1.77816	Tumor	Tumor
TCGA-G9-6499-01A	1.80501	1.45709	1.62981	Tumor	Tumor
TCGA-G9-7509-01A	1.69359	1.22454	1.61061	Tumor	Tumor
TCGA-G9-7510-01A	1.79134	1.40787	1.71136	Tumor	Tumor
TCGA-G9-7519-01A	1.74074	1.35731	1.62811	Tumor	Tumor
TCGA-G9-7521-01A	1.76139	1.35709	1.70892	Tumor	Tumor
TCGA-G9-7522-01A	1.71972	1.47196	1.68618	Tumor	Tumor
TCGA-G9-7523-01A	1.84447	1.37173	1.77254	Tumor	Tumor
TCGA-G9-7525-01A	1.67271	1.39025	1.62243	Tumor	Tumor
TCGA-G9-A9S0-01A	1.68101	1.22141	1.57141	Tumor	Tumor
TCGA-G9-A9S4-01A	1.56469	1.07908	1.49449	Tumor	Tumor
TCGA-G9-A9S7-01A	1.62128	1.1933	1.55855	Tumor	Tumor
TCGA-H9-7775-01A	1.68866	1.35865	1.58847	Tumor	Tumor
TCGA-H9-A6BX-01A	1.79828	1.49795	1.74571	Tumor	Tumor
TCGA-H9-A6BY-01A	1.55322	1.32894	1.50436	Tumor	Tumor
TCGA-HC-7075-01A	1.81334	1.26051	1.59382	Tumor	Tumor
TCGA-HC-7077-01A	1.69284	1.17431	1.47212	Tumor	Tumor
TCGA-HC-7078-01A	1.68234	1.42992	1.63689	Tumor	Tumor
TCGA-HC-7079-01A	1.90406	1.43359	1.87181	Tumor	Tumor
TCGA-HC-7080-01A	1.6126	1.24074	1.49707	Tumor	Tumor
TCGA-HC-7081-01A	1.71678	1.44235	1.69017	Tumor	Tumor
TCGA-HC-7209-01A	1.78377	1.39161	1.67482	Tumor	Tumor
TCGA-HC-7210-01A	1.90153	1.28055	1.72042	Tumor	Tumor
TCGA-HC-7211-01A	1.85293	1.52112	1.72312	Tumor	Tumor
TCGA-HC-7212-01A	1.70154	1.17576	1.59999	Tumor	Tumor
TCGA-HC-7213-01A	1.64952	1.34507	1.67534	Tumor	Tumor
TCGA-HC-7230-01A	1.78797	1.17476	1.61767	Tumor	Tumor
TCGA-HC-7231-01A	1.72452	1.42693	1.63129	Tumor	Tumor
TCGA-HC-7232-01A	1.77982	1.25503	1.62454	Tumor	Tumor
TCGA-HC-7233-01A	1.82153	1.37881	1.66954	Tumor	Tumor
TCGA-HC-7736-01A	1.77826	1.38561	1.73118	Tumor	Tumor
TCGA-HC-7737-01A	1.91218	1.44818	1.77173	Tumor	Tumor
TCGA-HC-7738-01A	1.77387	1.2193	1.59111	Tumor	Tumor
TCGA-HC-7740-01A	1.79382	1.54514	1.75161	Tumor	Tumor
TCGA-HC-7742-01A	1.68739	1.24506	1.62233	Tumor	Tumor
TCGA-HC-7744-01A	1.7347	1.30483	1.61173	Tumor	Tumor
TCGA-HC-7745-01A	1.70459	1.4317	1.67941	Tumor	Tumor
TCGA-HC-7747-01A	1.75059	1.522	1.67874	Tumor	Tumor
TCGA-HC-7748-01A	1.71772	1.32922	1.69418	Tumor	Tumor
TCGA-HC-7749-01A	1.6464	1.36154	1.58663	Tumor	Tumor
TCGA-HC-7750-01A	1.80826	1.40587	1.67231	Tumor	Tumor
TCGA-HC-7752-01A	1.48933	1.27592	1.50371	Tumor	Tumor
TCGA-HC-7818-01A	1.78042	1.48363	1.72265	Tumor	Tumor
TCGA-HC-7819-01A	1.73375	1.26303	1.56931	Tumor	Tumor
TCGA-HC-7820-01A	1.65962	1.28756	1.56147	Tumor	Tumor
TCGA-HC-7821-01A	1.62732	1.26681	1.59819	Tumor	Tumor
TCGA-HC-8213-01A	1.70287	1.41422	1.55773	Tumor	Tumor
TCGA-HC-8216-01A	1.70839	1.32557	1.62422	Tumor	Tumor
TCGA-HC-8256-01A	1.68113	1.24738	1.55793	Tumor	Tumor
TCGA-HC-8257-01A	1.69874	1.3126	1.61258	Tumor	Tumor
TCGA-HC-8258-01A	1.66264	1.51875	1.66687	Tumor	Tumor
TCGA-HC-8259-01A	1.61304	1.20186	1.51191	Tumor	Tumor
TCGA-HC-8260-01A	1.62087	1.39052	1.61716	Tumor	Tumor
TCGA-HC-8261-01A	1.68928	1.29916	1.59805	Tumor	Tumor
TCGA-HC-8262-01A	1.63405	1.34741	1.60274	Tumor	Tumor
TCGA-HC-8265-01A	1.69344	1.38132	1.62064	Tumor	Tumor
TCGA-HC-8266-01A	1.72602	1.44948	1.74532	Tumor	Tumor
TCGA-HC-A48F-01A	1.62614	1.24916	1.51818	Tumor	Tumor
TCGA-HC-A4ZV-01A	1.57615	1.16466	1.64187	Tumor	Tumor
TCGA-HC-A631-01A	1.7227	1.05457	1.54345	Tumor	Tumor
TCGA-HC-A632-01A	1.69377	1.11016	1.66156	Tumor	Tumor
TCGA-HC-A6AL-01A	1.58956	1.37171	1.57317	Tumor	Tumor
TCGA-HC-A6AN-01A	1.54778	1.41461	1.56434	Tumor	Tumor
TCGA-HC-A6AO-01A	1.71481	1.53491	1.58078	Tumor	Tumor
TCGA-HC-A6AP-01A	1.61919	1.60185	1.63837	Tumor	Tumor
TCGA-HC-A6AQ-01A	1.59541	1.45742	1.55492	Tumor	Tumor
TCGA-HC-A6AS-01A	1.60162	1.55062	1.63277	Tumor	Tumor
TCGA-HC-A6HX-01A	1.45135	1.47803	1.55322	Tumor	Tumor
TCGA-HC-A6HY-01A	1.60429	1.41719	1.5536	Tumor	Tumor
TCGA-HC-A76W-01A	1.75431	1.48696	1.7322	Tumor	Tumor
TCGA-HC-A76X-01A	1.67311	1.29107	1.56024	Tumor	Tumor
TCGA-HC-A8CY-01A	1.61081	1.1671	1.5258	Tumor	Tumor
TCGA-HC-A8D0-01A	1.78626	1.44352	1.69753	Tumor	Tumor
TCGA-HC-A8D1-01A	1.74236	1.39254	1.69491	Tumor	Tumor
TCGA-HC-A9TE-01A	1.5796	1.33761	1.67923	Tumor	Tumor
TCGA-HC-A9TH-01A	1.7314	1.2628	1.6576	Tumor	Tumor
TCGA-HI-7168-01A	1.67207	1.37903	1.72826	Tumor	Tumor
TCGA-HI-7169-01A	1.66145	1.49127	1.70156	Tumor	Tumor
TCGA-HI-7170-01A	1.84681	1.67542	1.83357	Tumor	Tumor
TCGA-HI-7171-01A	1.72099	1.14695	1.59209	Tumor	Tumor
TCGA-J4-8198-01A	1.71717	1.23747	1.6148	Tumor	Tumor
TCGA-J4-8200-01A	1.81709	1.38758	1.69951	Tumor	Tumor
TCGA-J4-A67K-01A	1.56156	1.42253	1.60191	Tumor	Tumor
TCGA-J4-A67L-01A	1.60601	1.456	1.59353	Tumor	Tumor
TCGA-J4-A67M-01A	1.621	1.53482	1.61556	Tumor	Tumor
TCGA-J4-A67N-01A	1.47253	1.44886	1.56002	Tumor	Tumor
TCGA-J4-A67O-01A	1.51782	1.62065	1.64746	Tumor	Tumor
TCGA-J4-A67Q-01A	1.53764	1.54802	1.61981	Tumor	Tumor
TCGA-J4-A67R-01A	1.58082	1.55896	1.6779	Tumor	Tumor
TCGA-J4-A67S-01A	1.54642	1.46511	1.57897	Tumor	Tumor
TCGA-J4-A67T-01A	1.85309	1.38345	1.64469	Tumor	Tumor
TCGA-J4-A6G1-01A	1.75707	1.46355	1.76648	Tumor	Tumor
TCGA-J4-A6G3-01A	1.83074	1.60104	1.78722	Tumor	Tumor
TCGA-J4-A6M7-01A	1.75659	1.27776	1.61395	Tumor	Tumor
TCGA-J4-A83I-01A	1.59865	1.24957	1.61874	Tumor	Tumor
TCGA-J4-A83J-01A	1.77746	1.35946	1.68045	Tumor	Tumor
TCGA-J4-A83K-01A	1.71568	1.28538	1.61998	Tumor	Tumor
TCGA-J4-A83L-01A	1.83262	1.41554	1.66123	Tumor	Tumor
TCGA-J4-A83M-01A	1.67526	1.20895	1.61128	Tumor	Tumor
TCGA-J4-A83N-01A	1.66126	1.32538	1.60124	Tumor	Tumor
TCGA-J4-AATV-01A	1.84566	1.47635	1.76519	Tumor	Tumor
TCGA-J4-AATZ-01A	1.68073	1.21345	1.59031	Tumor	Tumor
TCGA-J4-AAU2-01A	1.77267	1.35009	1.61903	Tumor	Tumor
TCGA-J9-A52B-01A	1.61981	1.16673	1.56539	Tumor	Tumor
TCGA-J9-A52C-01A	1.80813	1.49366	1.77472	Tumor	Tumor
TCGA-J9-A52D-01A	1.79868	1.09409	1.44814	Tumor	Tumor
TCGA-J9-A52E-01A	1.66862	1.27617	1.64049	Tumor	Tumor
TCGA-J9-A8CK-01A	1.72314	1.32075	1.67399	Tumor	Tumor
TCGA-J9-A8CL-01A	1.63774	1.18246	1.62258	Tumor	Tumor
TCGA-J9-A8CM-01A	1.69382	1.26831	1.66756	Tumor	Tumor
TCGA-J9-A8CN-01A	1.8021	1.43744	1.6237	Tumor	Tumor
TCGA-J9-A8CP-01A	1.73386	1.35832	1.61249	Tumor	Tumor
TCGA-KC-A4BL-01A	1.73745	1.51049	1.74444	Tumor	Tumor
TCGA-KC-A4BN-01A	1.8388	1.4231	1.63684	Tumor	Tumor
TCGA-KC-A4BR-01A	1.86832	1.52161	1.83264	Tumor	Tumor
TCGA-KC-A4BV-01A	1.68796	1.20953	1.6089	Tumor	Tumor
TCGA-KC-A7F3-01A	1.87385	1.36498	1.66517	Tumor	Tumor
TCGA-KC-A7F5-01A	1.58932	1.19791	1.48932	Tumor	Tumor
TCGA-KC-A7F6-01A	1.69591	1.26716	1.60788	Tumor	Tumor
TCGA-KC-A7FA-01A	1.64929	1.32173	1.58745	Tumor	Tumor
TCGA-KC-A7FD-01A	1.83577	1.20916	1.54792	Tumor	Tumor
TCGA-KC-A7FE-01A	1.73464	1.48948	1.69834	Tumor	Tumor
TCGA-KK-A59V-01A	1.57196	1.18759	1.61761	Tumor	Tumor
TCGA-KK-A59X-01A	1.68157	1.34382	1.59632	Tumor	Tumor
TCGA-KK-A59Y-01A	1.6135	1.34853	1.53571	Tumor	Tumor
TCGA-KK-A59Z-01A	1.80135	1.43515	1.72104	Tumor	Tumor
TCGA-KK-A5A1-01A	1.65552	1.10201	1.58125	Tumor	Tumor
TCGA-KK-A6DY-01A	1.78334	1.28642	1.6677	Tumor	Tumor
TCGA-KK-A6E0-01A	1.67906	1.39112	1.57685	Tumor	Tumor
TCGA-KK-A6E1-01A	1.58383	1.30588	1.5448	Tumor	Tumor
TCGA-KK-A6E2-01A	1.62446	1.15487	1.53428	Tumor	Tumor
TCGA-KK-A6E3-01A	1.62903	1.65969	1.6653	Tumor	Tumor
TCGA-KK-A6E4-01A	1.56554	1.22665	1.48662	Tumor	Tumor
TCGA-KK-A6E5-01A	1.70016	1.30225	1.62119	Tumor	Tumor
TCGA-KK-A6E6-01A	1.71808	1.43812	1.71134	Tumor	Tumor
TCGA-KK-A6E7-01A	1.73939	1.04838	1.5782	Tumor	Tumor
TCGA-KK-A6E8-01A	1.68228	1.27638	1.54339	Tumor	Tumor
TCGA-KK-A7AP-01A	1.62285	1.03178	1.46313	Tumor	Tumor
TCGA-KK-A7AQ-01A	1.52362	1.4381	1.54108	Tumor	Tumor
TCGA-KK-A7AU-01A	1.51309	1.16874	1.42061	Tumor	Tumor
TCGA-KK-A7AV-01A	1.72055	1.46635	1.70122	Tumor	Tumor
TCGA-KK-A7AW-01A	1.38195	1.50354	1.48667	Tumor	Tumor
TCGA-KK-A7AY-01A	1.5192	1.45194	1.54783	Tumor	Tumor
TCGA-KK-A7AZ-01A	1.58064	1.25952	1.54335	Tumor	Tumor
TCGA-KK-A7B0-01A	1.56578	1.56371	1.6121	Tumor	Tumor
TCGA-KK-A7B1-01A	1.73968	1.39328	1.65879	Tumor	Tumor
TCGA-KK-A7B2-01A	1.65127	1.65878	1.72746	Tumor	Tumor
TCGA-KK-A7B3-01A	1.56477	1.39557	1.5976	Tumor	Tumor
TCGA-KK-A7B4-01A	1.639	1.14937	1.59081	Tumor	Tumor
TCGA-KK-A8I4-01A	1.73028	1.43264	1.73314	Tumor	Tumor
TCGA-KK-A8I5-01A	1.84137	1.3518	1.67454	Tumor	Tumor
TCGA-KK-A8I6-01A	1.60094	1.30992	1.59143	Tumor	Tumor
TCGA-KK-A8I7-01A	1.69961	1.41236	1.68081	Tumor	Tumor
TCGA-KK-A8I8-01A	1.65095	1.15883	1.5647	Tumor	Tumor
TCGA-KK-A8I9-01A	1.79159	1.45747	1.67603	Tumor	Tumor
TCGA-KK-A8IA-01A	1.60002	0.981707	1.49258	Tumor	Tumor
TCGA-KK-A8IB-01A	1.79646	1.45433	1.66344	Tumor	Tumor
TCGA-KK-A8IC-01A	1.78875	1.42491	1.73829	Tumor	Tumor
TCGA-KK-A8ID-01A	1.64572	0.965613	1.59439	Tumor	Tumor
TCGA-KK-A8IF-01A	1.75331	1.10692	1.49303	Tumor	Tumor
TCGA-KK-A8IG-01A	1.7404	1.42491	1.72995	Tumor	Tumor
TCGA-KK-A8IH-01A	1.64791	1.35215	1.5848	Tumor	Tumor
TCGA-KK-A8II-01A	1.69012	1.12272	1.55347	Tumor	Tumor
TCGA-KK-A8IJ-01A	1.80556	1.25013	1.61009	Tumor	Tumor
TCGA-KK-A8IK-01A	1.65734	1.05767	1.4654	Tumor	Tumor
TCGA-KK-A8IL-01A	1.86483	1.46971	1.70478	Tumor	Tumor
TCGA-KK-A8IM-01A	1.69411	1.27177	1.60795	Tumor	Tumor
TCGA-M7-A71Y-01A	1.73886	1.40771	1.67049	Tumor	Tumor
TCGA-M7-A71Z-01A	1.54573	1.12428	1.45757	Tumor	Tumor
TCGA-M7-A720-01A	1.70852	1.47656	1.65764	Tumor	Tumor
TCGA-M7-A721-01A	1.84184	1.3617	1.67187	Tumor	Tumor
TCGA-M7-A722-01A	1.62598	1.34201	1.5016	Tumor	Tumor
TCGA-M7-A723-01A	1.74844	1.48143	1.67824	Tumor	Tumor
TCGA-M7-A724-01A	1.52209	1.063	1.43059	Tumor	Tumor
TCGA-M7-A725-01A	1.66039	1.39742	1.60497	Tumor	Tumor
TCGA-MG-AAMC-01A	1.59607	1.30058	1.55498	Tumor	Tumor
TCGA-QU-A6IL-01A	1.55149	1.31075	1.52445	Tumor	Tumor
TCGA-QU-A6IM-01A	1.44424	1.50501	1.51071	Tumor	Tumor
TCGA-QU-A6IN-01A	1.42668	1.27939	1.42643	Tumor	Tumor
TCGA-QU-A6IO-01A	1.47037	1.42352	1.54161	Tumor	Tumor
TCGA-QU-A6IP-01A	1.6341	1.33648	1.61938	Tumor	Tumor
TCGA-SU-A7E7-01A	1.75075	1.34021	1.69665	Tumor	Tumor
TCGA-TK-A8OK-01A	1.70492	1.35795	1.70944	Tumor	Tumor
TCGA-TP-A8TT-01A	1.81078	1.51295	1.72519	Tumor	Tumor
TCGA-TP-A8TV-01A	1.69655	1.19922	1.48867	Tumor	Tumor
TCGA-V1-A8MF-01A	1.71309	1.47477	1.69538	Tumor	Tumor
TCGA-V1-A8MG-01A	1.64063	1.3137	1.61523	Tumor	Tumor
TCGA-V1-A8MK-01A	1.75664	1.34434	1.63593	Tumor	Tumor
TCGA-V1-A8ML-01A	1.73733	1.33014	1.62902	Tumor	Tumor
TCGA-V1-A8MM-01A	1.66214	1.25875	1.57324	Tumor	Tumor
TCGA-V1-A8MU-01A	1.70091	1.45281	1.69965	Tumor	Tumor
TCGA-V1-A8WL-01A	1.7595	1.49233	1.67957	Tumor	Tumor
TCGA-V1-A8WN-01A	1.75755	1.29622	1.63399	Tumor	Tumor
TCGA-V1-A8WS-01A	1.71403	1.08273	1.56852	Tumor	Tumor
TCGA-V1-A8WV-01A	1.68696	1.3443	1.62423	Tumor	Tumor
TCGA-V1-A8WW-01A	1.73212	1.41089	1.63503	Tumor	Tumor
TCGA-V1-A8X3-01A	1.71662	1.30004	1.60637	Tumor	Tumor
TCGA-V1-A9O5-01A	1.80637	1.31218	1.72217	Tumor	Tumor
TCGA-V1-A9O7-01A	1.77371	1.4688	1.79842	Tumor	Tumor
TCGA-V1-A9O9-01A	1.77849	1.28215	1.70695	Tumor	Tumor
TCGA-V1-A9OA-01A	1.7524	1.38313	1.68968	Tumor	Tumor
TCGA-V1-A9OF-01A	1.7034	1.39671	1.55998	Tumor	Tumor
TCGA-V1-A9OH-01A	1.68938	1.29178	1.6175	Tumor	Tumor
TCGA-V1-A9OL-01A	1.63199	1.21722	1.58465	Tumor	Tumor
TCGA-V1-A9OQ-01A	1.71518	1.38889	1.62908	Tumor	Tumor
TCGA-V1-A9OT-01A	1.49192	1.20859	1.49486	Tumor	Tumor
TCGA-V1-A9OX-01A	1.66781	1.49028	1.66127	Tumor	Tumor
TCGA-V1-A9OY-01A	1.71674	1.41709	1.69102	Tumor	Tumor
TCGA-V1-A9Z7-01A	1.70107	1.35127	1.66694	Tumor	Tumor
TCGA-V1-A9Z8-01A	1.71148	1.58347	1.71648	Tumor	Tumor
TCGA-V1-A9Z9-01A	1.71938	1.32774	1.64586	Tumor	Tumor
TCGA-V1-A9ZG-01A	1.7027	1.39953	1.68426	Tumor	Tumor
TCGA-V1-A9ZI-01A	1.60903	1.26295	1.60838	Tumor	Tumor
TCGA-V1-A9ZK-01A	1.7747	1.35935	1.64656	Tumor	Tumor
TCGA-V1-A9ZR-01A	1.68838	1.30271	1.66349	Tumor	Tumor
TCGA-VN-A88I-01A	1.7635	1.56866	1.78615	Tumor	Tumor
TCGA-VN-A88K-01A	1.64416	1.215	1.55196	Tumor	Tumor
TCGA-VN-A88L-01A	1.7277	1.45034	1.71737	Tumor	Tumor
TCGA-VN-A88M-01A	1.61441	1.31194	1.59852	Tumor	Tumor
TCGA-VN-A88N-01A	1.64548	1.29426	1.58239	Tumor	Tumor
TCGA-VN-A88O-01A	1.78787	1.26845	1.61121	Tumor	Tumor
TCGA-VN-A88P-01A	1.73923	1.25739	1.59307	Tumor	Tumor
TCGA-VN-A88Q-01A	1.70053	1.24674	1.59906	Tumor	Tumor
TCGA-VN-A88R-01A	1.64889	1.33448	1.54458	Tumor	Tumor
TCGA-VN-A943-01A	1.75256	1.10905	1.47884	Tumor	Tumor
TCGA-VP-A872-01A	1.79929	1.38965	1.70902	Tumor	Tumor
TCGA-VP-A875-01A	1.68217	0.951278	1.462	Tumor	Tumor
TCGA-VP-A876-01A	1.66482	1.11639	1.54947	Tumor	Tumor
TCGA-VP-A878-01A	1.76224	1.44962	1.66569	Tumor	Tumor
TCGA-VP-A879-01A	1.67492	1.30248	1.6217	Tumor	Tumor
TCGA-VP-A87B-01A	1.59441	1.1452	1.51094	Tumor	Tumor
TCGA-VP-A87C-01A	1.73552	1.33212	1.74286	Tumor	Tumor
TCGA-VP-A87D-01A	1.59178	1.10231	1.51362	Tumor	Tumor
TCGA-VP-A87E-01A	1.79966	1.40069	1.75026	Tumor	Tumor
TCGA-VP-A87H-01A	1.77295	1.29113	1.64226	Tumor	Tumor
TCGA-VP-A87J-01A	1.70387	1.27282	1.58923	Tumor	Tumor
TCGA-VP-A87K-01A	1.56739	1.00289	1.47717	Tumor	Tumor
TCGA-VP-AA1N-01A	1.8874	1.38361	1.75833	Tumor	Tumor
TCGA-WW-A8ZI-01A	1.66386	1.19282	1.58181	Tumor	Tumor
TCGA-X4-A8KQ-01A	1.72776	1.41413	1.66376	Tumor	Tumor
TCGA-X4-A8KS-01A	1.5453	1.54697	1.6161	Tumor	Tumor
TCGA-XA-A8JR-01A	1.75725	1.25163	1.63682	Tumor	Tumor
TCGA-XJ-A83F-01A	1.60264	1.47204	1.6069	Tumor	Tumor
TCGA-XJ-A83G-01A	1.64146	1.38579	1.55484	Tumor	Tumor
TCGA-XJ-A83H-01A	1.77416	1.3718	1.70066	Tumor	Tumor
TCGA-XJ-A9DI-01A	1.70296	1.38412	1.69582	Tumor	Tumor
TCGA-XJ-A9DK-01A	1.76469	1.4703	1.69988	Tumor	Tumor
TCGA-XJ-A9DQ-01A	1.62351	1.44487	1.63219	Tumor	Tumor
TCGA-XJ-A9DX-01A	1.5507	0.991373	1.48723	Tumor	Tumor
TCGA-XK-AAIR-01A	1.66677	1.40975	1.6188	Tumor	Tumor
TCGA-XK-AAIV-01A	1.71803	1.37044	1.72063	Tumor	Tumor
TCGA-XK-AAIW-01A	1.71079	1.06913	1.56628	Tumor	Tumor
TCGA-XK-AAJ3-01A	1.59572	1.19361	1.5163	Tumor	Tumor
TCGA-XK-AAJA-01A	1.58872	1.33306	1.56858	Tumor	Tumor
TCGA-XK-AAJP-01A	1.64374	1.16126	1.51572	Tumor	Tumor
TCGA-XK-AAJR-01A	1.69591	1.29878	1.62148	Tumor	Tumor
TCGA-XK-AAJT-01A	1.73773	1.43364	1.69158	Tumor	Tumor
TCGA-XK-AAJU-01A	1.72085	1.42386	1.64107	Tumor	Tumor
TCGA-XK-AAK1-01A	1.64906	1.32048	1.52225	Tumor	Tumor
TCGA-XQ-A8TA-01A	1.72136	0.954986	1.50629	Tumor	Tumor
TCGA-XQ-A8TB-01A	1.7409	1.19529	1.66548	Tumor	Tumor
TCGA-Y6-A8TL-01A	1.78877	1.23769	1.60425	Tumor	Tumor
TCGA-Y6-A9XI-01A	1.58647	1.23678	1.58007	Tumor	Tumor
TCGA-YJ-A8SW-01A	1.65549	0.97325	1.4783	Tumor	Tumor
TCGA-YL-A8HJ-01A	1.76025	1.38953	1.73485	Tumor	Tumor
TCGA-YL-A8HK-01A	1.73652	1.33504	1.68584	Tumor	Tumor
TCGA-YL-A8HL-01A	1.62481	1.11869	1.54231	Tumor	Tumor
TCGA-YL-A8HM-01A	1.68549	1.29858	1.57188	Tumor	Tumor
TCGA-YL-A8HO-01A	1.75655	1.48734	1.75405	Tumor	Tumor
TCGA-YL-A8S8-01A	1.792	1.25421	1.61147	Tumor	Tumor
TCGA-YL-A8S9-01A	1.68553	1.00005	1.50238	Tumor	Tumor
TCGA-YL-A8SA-01A	1.62495	1.25514	1.52757	Tumor	Tumor
TCGA-YL-A8SB-01A	1.70958	1.51114	1.66837	Tumor	Tumor
TCGA-YL-A8SC-01A	1.71527	1.1431	1.56389	Tumor	Tumor
TCGA-YL-A8SI-01A	1.79019	1.49395	1.71302	Tumor	Tumor
TCGA-YL-A9WH-01A	1.76499	1.03536	1.54363	Tumor	Tumor
TCGA-YL-A9WI-01A	1.69867	1.174	1.51763	Tumor	Tumor
TCGA-YL-A9WJ-01A	1.77879	1.31628	1.68547	Tumor	Tumor
TCGA-YL-A9WK-01A	1.63861	1.50744	1.73063	Tumor	Tumor
TCGA-YL-A9WL-01A	1.62207	1.16925	1.49573	Tumor	Tumor
TCGA-YL-A9WX-01A	1.77934	1.35614	1.69962	Tumor	Tumor
TCGA-YL-A9WY-01A	1.6866	1.31519	1.70032	Tumor	Tumor
TCGA-ZG-A8QW-01A	1.72261	1.48612	1.69724	Tumor	Tumor
TCGA-ZG-A8QX-01A	1.72314	1.36361	1.6334	Tumor	Tumor
TCGA-ZG-A8QY-01A	1.76632	1.34146	1.64124	Tumor	Tumor
TCGA-ZG-A8QZ-01A	1.73532	1.40074	1.71915	Tumor	Tumor
TCGA-ZG-A9KY-01A	1.67897	1.11137	1.60513	Tumor	Tumor
TCGA-ZG-A9L0-01A	1.76056	1.43201	1.74606	Tumor	Tumor
TCGA-ZG-A9L1-01A	1.54331	1.16333	1.60431	Tumor	Tumor
TCGA-ZG-A9L2-01A	1.74867	1.45361	1.74756	Tumor	Tumor
TCGA-ZG-A9L4-01A	1.78182	1.43103	1.77473	Tumor	Tumor
TCGA-ZG-A9L5-01A	1.61722	1.05835	1.57052	Tumor	Tumor
TCGA-ZG-A9L6-01A	1.78244	1.52524	1.74841	Tumor	Tumor
TCGA-ZG-A9L9-01A	1.62714	1.45136	1.697	Tumor	Tumor
TCGA-ZG-A9LB-01A	1.83359	1.54514	1.78295	Tumor	Tumor
TCGA-ZG-A9LM-01A	1.68243	1.30987	1.65904	Tumor	Tumor
TCGA-ZG-A9LN-01A	1.82834	1.44855	1.75233	Tumor	Tumor
TCGA-ZG-A9LS-01A	1.65623	1.34254	1.6686	Tumor	Tumor
TCGA-ZG-A9LU-01A	1.56333	1.48523	1.65213	Tumor	Tumor
TCGA-ZG-A9LY-01A	1.72213	1.41499	1.68322	Tumor	Tumor
TCGA-ZG-A9LZ-01A	1.64503	1.2812	1.61927	Tumor	Tumor
TCGA-ZG-A9M4-01A	1.6818	1.16442	1.60914	Tumor	Tumor
TCGA-ZG-A9MC-01A	1.68794	1.39151	1.79838	Tumor	Tumor
TCGA-ZG-A9N3-01A	1.47607	1.25614	1.60597	Tumor	Tumor
TCGA-ZG-A9ND-01A	1.68633	1.31047	1.56692	Tumor	Tumor
TCGA-ZG-A9NI-01A	1.69862	1.41684	1.6768	Tumor	Tumor
