# Supplementary material for: Single-cell RNA combined with bulk RNA analysis to explore oxidative stress and energy metabolism factors and found a new prostate cancer oncogene MXRA8
Source: Aging (Albany NY). 2024 Mar 4;16(5):4469–502. doi: 10.18632/aging.205599 (PMC10968713; doi:10.18632/aging.205599)
Supplement: Supplementary Table 4 [file aging-16-205599-s005.xlsx]

## Sheet: corr_gene
Supplementary Table 4. Identification of oxidative stress metabolic subtypes and analysis of differential expression between subtypes.
PODXL2
GSTM3
CYP4B1
GSTM4
ME1
LYVE1
PPP1R3C
FUT3
B3GALT6
AKR1B1
CYP4F22
NUP210
CALM1
B3GALT2
GSTM5
MAT2B
SLC25A10
CYP3A5
ACSF2
GGCT
CHST2
PDK4
CHST3
MPC2
CHST11
B3GAT3
SLC37A1
IDUA
GGT6
ENO2
ACAA2
PYGM
CHST15
ABO
PGLS
CES1
PTGIS
CYP27A1
FUT2
AHR
ALDH2
UST
PYGL
PAOX
PFKFB3
D2HGDH
ST3GAL1
AOC3
OGN
CSPG4
BGN
MAOB
CYP2J2
DCN
AOC1
B3GNT3
DCXR
PRELP
LDHB
SDC2
HSPG2
NNMT
ALDH1A1

## Sheet: cc_group
sample	cluster
TCGA-2A-A8VL-01A	C1
TCGA-2A-A8VO-01A	C2
TCGA-2A-A8VT-01A	C2
TCGA-2A-A8VV-01A	C1
TCGA-2A-A8VX-01A	C2
TCGA-2A-A8W1-01A	C2
TCGA-2A-A8W3-01A	C2
TCGA-2A-AAYF-01A	C2
TCGA-2A-AAYO-01A	C1
TCGA-2A-AAYU-01A	C2
TCGA-4L-AA1F-01A	C1
TCGA-CH-5737-01A	C2
TCGA-CH-5738-01A	C1
TCGA-CH-5739-01A	C1
TCGA-CH-5740-01A	C2
TCGA-CH-5741-01A	C2
TCGA-CH-5743-01A	C1
TCGA-CH-5744-01A	C2
TCGA-CH-5745-01A	C1
TCGA-CH-5746-01A	C1
TCGA-CH-5748-01A	C2
TCGA-CH-5750-01A	C2
TCGA-CH-5751-01A	C2
TCGA-CH-5752-01A	C2
TCGA-CH-5753-01A	C2
TCGA-CH-5754-01A	C2
TCGA-CH-5761-01A	C2
TCGA-CH-5762-01A	C1
TCGA-CH-5763-01A	C1
TCGA-CH-5764-01A	C1
TCGA-CH-5765-01A	C2
TCGA-CH-5766-01A	C1
TCGA-CH-5767-01A	C2
TCGA-CH-5768-01A	C2
TCGA-CH-5769-01A	C1
TCGA-CH-5771-01A	C1
TCGA-CH-5772-01A	C2
TCGA-CH-5788-01A	C2
TCGA-CH-5789-01A	C1
TCGA-CH-5790-01A	C2
TCGA-CH-5791-01A	C2
TCGA-CH-5792-01A	C1
TCGA-CH-5794-01A	C2
TCGA-EJ-5494-01A	C1
TCGA-EJ-5495-01A	C1
TCGA-EJ-5496-01A	C2
TCGA-EJ-5497-01A	C1
TCGA-EJ-5498-01A	C1
TCGA-EJ-5499-01A	C1
TCGA-EJ-5501-01A	C1
TCGA-EJ-5502-01A	C1
TCGA-EJ-5503-01A	C1
TCGA-EJ-5504-01A	C1
TCGA-EJ-5505-01A	C1
TCGA-EJ-5506-01A	C1
TCGA-EJ-5507-01A	C2
TCGA-EJ-5508-01A	C1
TCGA-EJ-5509-01A	C1
TCGA-EJ-5510-01A	C1
TCGA-EJ-5511-01A	C2
TCGA-EJ-5512-01A	C1
TCGA-EJ-5514-01A	C1
TCGA-EJ-5515-01A	C1
TCGA-EJ-5516-01A	C1
TCGA-EJ-5517-01A	C1
TCGA-EJ-5518-01A	C1
TCGA-EJ-5519-01A	C2
TCGA-EJ-5521-01A	C1
TCGA-EJ-5522-01A	C1
TCGA-EJ-5524-01A	C1
TCGA-EJ-5525-01A	C1
TCGA-EJ-5526-01A	C1
TCGA-EJ-5527-01A	C1
TCGA-EJ-5530-01A	C1
TCGA-EJ-5531-01A	C1
TCGA-EJ-5532-01A	C1
TCGA-EJ-5542-01A	C1
TCGA-EJ-7115-01A	C1
TCGA-EJ-7123-01A	C2
TCGA-EJ-7125-01A	C2
TCGA-EJ-7314-01A	C2
TCGA-EJ-7315-01A	C1
TCGA-EJ-7317-01A	C2
TCGA-EJ-7321-01A	C2
TCGA-EJ-7327-01A	C1
TCGA-EJ-7328-01A	C1
TCGA-EJ-7330-01A	C1
TCGA-EJ-7331-01A	C1
TCGA-EJ-7781-01A	C1
TCGA-EJ-7782-01A	C2
TCGA-EJ-7783-01A	C1
TCGA-EJ-7784-01A	C2
TCGA-EJ-7785-01A	C1
TCGA-EJ-7786-01A	C1
TCGA-EJ-7788-01A	C1
TCGA-EJ-7789-01A	C2
TCGA-EJ-7791-01A	C1
TCGA-EJ-7792-01A	C1
TCGA-EJ-7793-01A	C1
TCGA-EJ-7794-01A	C1
TCGA-EJ-7797-01A	C1
TCGA-EJ-8468-01A	C1
TCGA-EJ-8469-01A	C2
TCGA-EJ-8470-01A	C1
TCGA-EJ-8472-01A	C2
TCGA-EJ-8474-01A	C1
TCGA-EJ-A46B-01A	C1
TCGA-EJ-A46D-01A	C1
TCGA-EJ-A46E-01A	C1
TCGA-EJ-A46F-01A	C2
TCGA-EJ-A46G-01A	C1
TCGA-EJ-A46H-01A	C1
TCGA-EJ-A46I-01A	C1
TCGA-EJ-A65B-01A	C1
TCGA-EJ-A65D-01A	C2
TCGA-EJ-A65E-01A	C2
TCGA-EJ-A65F-01A	C2
TCGA-EJ-A65G-01A	C2
TCGA-EJ-A65J-01A	C2
TCGA-EJ-A65M-01A	C1
TCGA-EJ-A6RA-01A	C1
TCGA-EJ-A6RC-01A	C1
TCGA-EJ-A7NF-01A	C2
TCGA-EJ-A7NG-01A	C1
TCGA-EJ-A7NH-01A	C1
TCGA-EJ-A7NJ-01A	C1
TCGA-EJ-A7NK-01A	C1
TCGA-EJ-A7NM-01A	C1
TCGA-EJ-A7NN-01A	C1
TCGA-EJ-A8FN-01A	C1
TCGA-EJ-A8FO-01A	C1
TCGA-EJ-A8FP-01A	C1
TCGA-EJ-A8FS-01A	C2
TCGA-EJ-A8FU-01A	C1
TCGA-EJ-AB20-01A	C1
TCGA-EJ-AB27-01A	C1
TCGA-FC-7708-01A	C1
TCGA-FC-7961-01A	C1
TCGA-FC-A4JI-01A	C2
TCGA-FC-A5OB-01A	C2
TCGA-FC-A66V-01A	C1
TCGA-FC-A6HD-01A	C2
TCGA-FC-A8O0-01A	C1
TCGA-G9-6329-01A	C1
TCGA-G9-6332-01A	C2
TCGA-G9-6333-01A	C1
TCGA-G9-6336-01A	C1
TCGA-G9-6338-01A	C1
TCGA-G9-6339-01A	C2
TCGA-G9-6342-01A	C1
TCGA-G9-6343-01A	C2
TCGA-G9-6347-01A	C1
TCGA-G9-6348-01A	C1
TCGA-G9-6351-01A	C1
TCGA-G9-6353-01A	C1
TCGA-G9-6354-01A	C2
TCGA-G9-6356-01A	C1
TCGA-G9-6361-01A	C1
TCGA-G9-6362-01A	C2
TCGA-G9-6363-01A	C1
TCGA-G9-6364-01A	C1
TCGA-G9-6365-01A	C1
TCGA-G9-6366-01A	C2
TCGA-G9-6367-01A	C1
TCGA-G9-6369-01A	C2
TCGA-G9-6370-01A	C1
TCGA-G9-6371-01A	C2
TCGA-G9-6373-01A	C1
TCGA-G9-6377-01A	C2
TCGA-G9-6378-01A	C1
TCGA-G9-6379-01A	C1
TCGA-G9-6384-01A	C1
TCGA-G9-6385-01A	C1
TCGA-G9-6494-01A	C1
TCGA-G9-6496-01A	C2
TCGA-G9-6498-01A	C1
TCGA-G9-6499-01A	C2
TCGA-G9-7509-01A	C1
TCGA-G9-7510-01A	C1
TCGA-G9-7519-01A	C1
TCGA-G9-7521-01A	C1
TCGA-G9-7522-01A	C1
TCGA-G9-7523-01A	C1
TCGA-G9-7525-01A	C2
TCGA-G9-A9S0-01A	C2
TCGA-G9-A9S7-01A	C2
TCGA-H9-7775-01A	C1
TCGA-H9-A6BX-01A	C1
TCGA-H9-A6BY-01A	C2
TCGA-HC-7075-01A	C2
TCGA-HC-7077-01A	C2
TCGA-HC-7078-01A	C2
TCGA-HC-7079-01A	C1
TCGA-HC-7080-01A	C2
TCGA-HC-7081-01A	C1
TCGA-HC-7209-01A	C2
TCGA-HC-7210-01A	C1
TCGA-HC-7211-01A	C2
TCGA-HC-7212-01A	C2
TCGA-HC-7213-01A	C2
TCGA-HC-7230-01A	C2
TCGA-HC-7231-01A	C2
TCGA-HC-7232-01A	C1
TCGA-HC-7233-01A	C1
TCGA-HC-7736-01A	C1
TCGA-HC-7737-01A	C1
TCGA-HC-7738-01A	C2
TCGA-HC-7740-01A	C1
TCGA-HC-7742-01A	C1
TCGA-HC-7744-01A	C2
TCGA-HC-7745-01A	C1
TCGA-HC-7747-01A	C1
TCGA-HC-7748-01A	C1
TCGA-HC-7749-01A	C2
TCGA-HC-7750-01A	C1
TCGA-HC-7752-01A	C2
TCGA-HC-7818-01A	C1
TCGA-HC-7819-01A	C2
TCGA-HC-7820-01A	C1
TCGA-HC-7821-01A	C2
TCGA-HC-8213-01A	C2
TCGA-HC-8216-01A	C1
TCGA-HC-8256-01A	C2
TCGA-HC-8257-01A	C2
TCGA-HC-8258-01A	C1
TCGA-HC-8259-01A	C2
TCGA-HC-8260-01A	C1
TCGA-HC-8261-01A	C2
TCGA-HC-8262-01A	C2
TCGA-HC-8265-01A	C1
TCGA-HC-8266-01A	C1
TCGA-HC-A48F-01A	C2
TCGA-HC-A4ZV-01A	C1
TCGA-HC-A631-01A	C2
TCGA-HC-A632-01A	C2
TCGA-HC-A6AL-01A	C2
TCGA-HC-A6AN-01A	C2
TCGA-HC-A6AO-01A	C2
TCGA-HC-A6AP-01A	C1
TCGA-HC-A6AQ-01A	C2
TCGA-HC-A6AS-01A	C1
TCGA-HC-A6HX-01A	C1
TCGA-HC-A6HY-01A	C2
TCGA-HC-A76W-01A	C1
TCGA-HC-A76X-01A	C2
TCGA-HC-A8CY-01A	C2
TCGA-HC-A8D0-01A	C1
TCGA-HC-A8D1-01A	C1
TCGA-HC-A9TE-01A	C1
TCGA-HC-A9TH-01A	C2
TCGA-HI-7168-01A	C1
TCGA-HI-7169-01A	C1
TCGA-HI-7170-01A	C1
TCGA-HI-7171-01A	C2
TCGA-J4-8198-01A	C1
TCGA-J4-8200-01A	C1
TCGA-J4-A67K-01A	C2
TCGA-J4-A67L-01A	C2
TCGA-J4-A67M-01A	C1
TCGA-J4-A67N-01A	C2
TCGA-J4-A67O-01A	C1
TCGA-J4-A67Q-01A	C1
TCGA-J4-A67R-01A	C1
TCGA-J4-A67S-01A	C2
TCGA-J4-A67T-01A	C1
TCGA-J4-A6G1-01A	C1
TCGA-J4-A6G3-01A	C1
TCGA-J4-A6M7-01A	C2
TCGA-J4-A83I-01A	C2
TCGA-J4-A83J-01A	C2
TCGA-J4-A83K-01A	C1
TCGA-J4-A83L-01A	C1
TCGA-J4-A83M-01A	C2
TCGA-J4-A83N-01A	C2
TCGA-J4-AATV-01A	C1
TCGA-J4-AATZ-01A	C2
TCGA-J4-AAU2-01A	C2
TCGA-J9-A52B-01A	C1
TCGA-J9-A52C-01A	C1
TCGA-J9-A52D-01A	C2
TCGA-J9-A52E-01A	C1
TCGA-J9-A8CK-01A	C1
TCGA-J9-A8CL-01A	C1
TCGA-J9-A8CM-01A	C1
TCGA-J9-A8CN-01A	C2
TCGA-J9-A8CP-01A	C2
TCGA-KC-A4BL-01A	C1
TCGA-KC-A4BN-01A	C1
TCGA-KC-A4BR-01A	C1
TCGA-KC-A4BV-01A	C1
TCGA-KC-A7F3-01A	C1
TCGA-KC-A7F5-01A	C2
TCGA-KC-A7F6-01A	C1
TCGA-KC-A7FA-01A	C2
TCGA-KC-A7FD-01A	C2
TCGA-KC-A7FE-01A	C1
TCGA-KK-A59V-01A	C2
TCGA-KK-A59X-01A	C2
TCGA-KK-A59Y-01A	C2
TCGA-KK-A59Z-01A	C1
TCGA-KK-A5A1-01A	C2
TCGA-KK-A6DY-01A	C1
TCGA-KK-A6E0-01A	C2
TCGA-KK-A6E1-01A	C2
TCGA-KK-A6E2-01A	C2
TCGA-KK-A6E3-01A	C1
TCGA-KK-A6E4-01A	C2
TCGA-KK-A6E5-01A	C2
TCGA-KK-A6E6-01A	C1
TCGA-KK-A6E7-01A	C2
TCGA-KK-A6E8-01A	C2
TCGA-KK-A7AP-01A	C2
TCGA-KK-A7AQ-01A	C2
TCGA-KK-A7AU-01A	C2
TCGA-KK-A7AV-01A	C1
TCGA-KK-A7AW-01A	C2
TCGA-KK-A7AY-01A	C2
TCGA-KK-A7AZ-01A	C2
TCGA-KK-A7B0-01A	C1
TCGA-KK-A7B1-01A	C1
TCGA-KK-A7B2-01A	C1
TCGA-KK-A7B3-01A	C1
TCGA-KK-A7B4-01A	C2
TCGA-KK-A8I4-01A	C1
TCGA-KK-A8I5-01A	C2
TCGA-KK-A8I6-01A	C2
TCGA-KK-A8I7-01A	C1
TCGA-KK-A8I8-01A	C2
TCGA-KK-A8I9-01A	C1
TCGA-KK-A8IA-01A	C2
TCGA-KK-A8IB-01A	C2
TCGA-KK-A8IC-01A	C1
TCGA-KK-A8ID-01A	C2
TCGA-KK-A8IF-01A	C2
TCGA-KK-A8IG-01A	C1
TCGA-KK-A8IH-01A	C2
TCGA-KK-A8II-01A	C2
TCGA-KK-A8IJ-01A	C2
TCGA-KK-A8IK-01A	C2
TCGA-KK-A8IL-01A	C1
TCGA-KK-A8IM-01A	C1
TCGA-M7-A71Y-01A	C1
TCGA-M7-A71Z-01A	C2
TCGA-M7-A720-01A	C1
TCGA-M7-A721-01A	C1
TCGA-M7-A722-01A	C2
TCGA-M7-A723-01A	C1
TCGA-M7-A724-01A	C2
TCGA-M7-A725-01A	C2
TCGA-MG-AAMC-01A	C2
TCGA-QU-A6IL-01A	C2
TCGA-QU-A6IM-01A	C2
TCGA-QU-A6IN-01A	C2
TCGA-QU-A6IO-01A	C2
TCGA-QU-A6IP-01A	C1
TCGA-SU-A7E7-01A	C1
TCGA-TK-A8OK-01A	C1
TCGA-TP-A8TT-01A	C1
TCGA-TP-A8TV-01A	C2
TCGA-V1-A8MF-01A	C1
TCGA-V1-A8MG-01A	C1
TCGA-V1-A8MK-01A	C1
TCGA-V1-A8ML-01A	C1
TCGA-V1-A8MM-01A	C2
TCGA-V1-A8MU-01A	C1
TCGA-V1-A8WL-01A	C1
TCGA-V1-A8WN-01A	C1
TCGA-V1-A8WS-01A	C2
TCGA-V1-A8WV-01A	C1
TCGA-V1-A8WW-01A	C2
TCGA-V1-A8X3-01A	C1
TCGA-V1-A9O5-01A	C1
TCGA-V1-A9O7-01A	C1
TCGA-V1-A9O9-01A	C1
TCGA-V1-A9OA-01A	C1
TCGA-V1-A9OF-01A	C2
TCGA-V1-A9OH-01A	C1
TCGA-V1-A9OL-01A	C2
TCGA-V1-A9OQ-01A	C2
TCGA-V1-A9OT-01A	C2
TCGA-V1-A9OX-01A	C1
TCGA-V1-A9OY-01A	C1
TCGA-V1-A9Z7-01A	C1
TCGA-V1-A9Z8-01A	C1
TCGA-V1-A9Z9-01A	C1
TCGA-V1-A9ZG-01A	C1
TCGA-V1-A9ZI-01A	C1
TCGA-V1-A9ZK-01A	C1
TCGA-V1-A9ZR-01A	C1
TCGA-VN-A88I-01A	C1
TCGA-VN-A88K-01A	C1
TCGA-VN-A88L-01A	C1
TCGA-VN-A88M-01A	C2
TCGA-VN-A88N-01A	C2
TCGA-VN-A88O-01A	C2
TCGA-VN-A88P-01A	C1
TCGA-VN-A88Q-01A	C2
TCGA-VN-A88R-01A	C2
TCGA-VN-A943-01A	C2
TCGA-VP-A872-01A	C1
TCGA-VP-A875-01A	C2
TCGA-VP-A876-01A	C2
TCGA-VP-A878-01A	C1
TCGA-VP-A879-01A	C1
TCGA-VP-A87B-01A	C2
TCGA-VP-A87C-01A	C1
TCGA-VP-A87D-01A	C2
TCGA-VP-A87E-01A	C1
TCGA-VP-A87H-01A	C2
TCGA-VP-A87J-01A	C2
TCGA-VP-A87K-01A	C2
TCGA-VP-AA1N-01A	C1
TCGA-WW-A8ZI-01A	C2
TCGA-X4-A8KQ-01A	C1
TCGA-X4-A8KS-01A	C1
TCGA-XA-A8JR-01A	C1
TCGA-XJ-A83F-01A	C2
TCGA-XJ-A83G-01A	C2
TCGA-XJ-A83H-01A	C2
TCGA-XJ-A9DI-01A	C1
TCGA-XJ-A9DK-01A	C1
TCGA-XJ-A9DQ-01A	C1
TCGA-XJ-A9DX-01A	C2
TCGA-XK-AAIR-01A	C1
TCGA-XK-AAIV-01A	C1
TCGA-XK-AAIW-01A	C2
TCGA-XK-AAJA-01A	C2
TCGA-XK-AAJP-01A	C2
TCGA-XK-AAJR-01A	C1
TCGA-XK-AAJT-01A	C1
TCGA-XK-AAJU-01A	C1
TCGA-XQ-A8TA-01A	C2
TCGA-XQ-A8TB-01A	C1
TCGA-Y6-A8TL-01A	C1
TCGA-Y6-A9XI-01A	C2
TCGA-YJ-A8SW-01A	C2
TCGA-YL-A8HJ-01A	C1
TCGA-YL-A8HK-01A	C1
TCGA-YL-A8HL-01A	C2
TCGA-YL-A8HM-01A	C2
TCGA-YL-A8HO-01A	C1
TCGA-YL-A8S8-01A	C2
TCGA-YL-A8S9-01A	C2
TCGA-YL-A8SA-01A	C2
TCGA-YL-A8SB-01A	C1
TCGA-YL-A8SC-01A	C2
TCGA-YL-A8SI-01A	C1
TCGA-YL-A9WH-01A	C2
TCGA-YL-A9WI-01A	C2
TCGA-YL-A9WJ-01A	C1
TCGA-YL-A9WK-01A	C1
TCGA-YL-A9WL-01A	C2
TCGA-YL-A9WX-01A	C1
TCGA-YL-A9WY-01A	C1
TCGA-ZG-A8QW-01A	C1
TCGA-ZG-A8QX-01A	C1
TCGA-ZG-A8QY-01A	C1
TCGA-ZG-A8QZ-01A	C1
TCGA-ZG-A9KY-01A	C2
TCGA-ZG-A9L0-01A	C1
TCGA-ZG-A9L1-01A	C1
TCGA-ZG-A9L2-01A	C1
TCGA-ZG-A9L4-01A	C1
TCGA-ZG-A9L5-01A	C2
TCGA-ZG-A9L6-01A	C1
TCGA-ZG-A9L9-01A	C1
TCGA-ZG-A9LB-01A	C1
TCGA-ZG-A9LM-01A	C1
TCGA-ZG-A9LN-01A	C1
TCGA-ZG-A9LS-01A	C1
TCGA-ZG-A9LU-01A	C1
TCGA-ZG-A9LY-01A	C1
TCGA-ZG-A9LZ-01A	C2
TCGA-ZG-A9M4-01A	C2
TCGA-ZG-A9MC-01A	C1
TCGA-ZG-A9N3-01A	C2
TCGA-ZG-A9ND-01A	C2
TCGA-ZG-A9NI-01A	C1

## Sheet: cc_deg
gene	log2FC	pvalue	adjusted_pvalue
CAV2	-1.00975	9.52749e-94	1.86148e-89
PRICKLE2	-0.770961	1.06264e-90	7.58538e-87
MSRB3	-1.46686	1.16471e-90	7.58538e-87
SCARA3	-1.34562	1.19602e-89	5.84198e-86
SMIM10	-1.10701	1.88105e-89	7.35039e-86
BHMT2	-0.87539	2.61486e-89	8.51485e-86
AOC3	-1.48046	3.51759e-89	9.81811e-86
MEIS1	-0.812483	4.79464e-89	1.17097e-85
FAXDC2	-1.10787	1.07415e-88	2.33186e-85
TNS1	-1.66883	2.32834e-88	4.54911e-85
EDNRA	-1.36123	3.18229e-88	5.65233e-85
EHD2	-1.34148	6.55617e-88	1.06745e-84
ATP2B4	-1.43895	1.35288e-87	2.03328e-84
STOM	-1.27279	2.27216e-87	3.17096e-84
RBMS3	-0.698878	8.00349e-87	1.04248e-83
C8orf88	-1.04091	1.69526e-86	2.07012e-83
SLC24A3	-1.12637	2.38853e-86	2.74512e-83
KANK2	-1.19973	6.23431e-86	6.76699e-83
CHST3	-1.00248	7.41785e-86	7.62789e-83
IRAG1	-1.40768	2.31138e-85	2.25799e-82
FGF2	-0.809068	4.85992e-85	4.52158e-82
TCF7L1	-0.949655	6.91049e-85	6.13714e-82
GJA1	-1.51999	1.14396e-84	9.71766e-82
CAV1	-1.47613	1.2345e-84	1.00498e-81
CLIC6	-1.13679	7.16707e-84	5.60121e-81
SSPN	-0.965594	2.15048e-83	1.616e-80
ADCY5	-1.12161	2.37727e-83	1.72026e-80
NT5E	-0.972142	2.96647e-83	2.06996e-80
JAZF1	-1.07098	3.60926e-83	2.43165e-80
GPRASP1	-1.01184	5.88994e-83	3.83592e-80
TMEM200B	-1.22254	7.05206e-83	4.44462e-80
AXL	-1.11431	1.01569e-82	6.20143e-80
TSPAN2	-1.12605	1.08498e-82	6.42374e-80
PRTFDC1	-0.721978	1.14389e-82	6.57334e-80
FZD7	-1.135	1.9405e-82	1.07266e-79
TRPC4	-0.739218	1.97645e-82	1.07266e-79
FLNA	-1.84088	4.00975e-82	2.11737e-79
RBPMS	-1.19335	4.47196e-81	2.29929e-78
SYDE1	-0.930963	5.33556e-81	2.67298e-78
MEIS2	-1.11489	8.31004e-81	4.05904e-78
NEXN	-1.45053	2.11556e-80	9.84138e-78
PALLD	-1.36783	3.47762e-80	1.58013e-77
PDPN	-1.08735	3.70707e-80	1.64611e-77
MYLK	-1.84377	1.20879e-79	5.24828e-77
EFEMP2	-1.18153	1.784e-79	7.57733e-77
ADGRA2	-1.49206	1.9228e-79	7.99313e-77
FERMT2	-0.999807	2.78695e-79	1.1344e-76
HEPH	-1.0255	3.44589e-79	1.374e-76
CAVIN1	-1.33764	4.22716e-79	1.65181e-76
PPP1R12B	-1.29956	6.55779e-79	2.51228e-76
LMOD1	-1.81916	9.36781e-79	3.38941e-76
FBXO17	-0.93273	1.08029e-78	3.83757e-76
MPP2	-0.778378	2.77665e-78	9.68752e-76
ARHGAP23	-1.03919	3.52972e-78	1.20989e-75
SERPINF1	-1.52203	4.0166e-78	1.35304e-75
OGN	-1.60155	5.55556e-78	1.83655e-75
MXRA7	-1.15855	5.63995e-78	1.83655e-75
DPYSL3	-1.21777	6.37195e-78	2.0409e-75
KCNJ8	-1.06872	1.15871e-77	3.65144e-75
CACHD1	-0.878799	1.93178e-77	5.99097e-75
RASL12	-1.48444	2.08341e-77	6.36025e-75
FRMD6	-1.04773	7.46837e-77	2.24488e-74
KCNMB1	-1.39951	7.84946e-77	2.32368e-74
VWA5A	-0.971805	9.93497e-77	2.89716e-74
EMILIN1	-1.42746	1.69274e-76	4.86363e-74
TGFBR3	-0.987107	1.97345e-76	5.588e-74
CHRDL1	-1.88716	2.56292e-76	7.15347e-74
ITIH5	-0.975232	2.84657e-76	7.83327e-74
TSPAN18	-1.04913	2.95585e-76	8.02103e-74
CLIP3	-1.21401	3.10506e-76	8.31051e-74
PMP22	-1.17362	5.23981e-76	1.38345e-73
CCDC69	-1.10103	7.57016e-76	1.97208e-73
SLC8A1	-0.780525	8.58539e-76	2.20712e-73
SORBS1	-1.59037	9.38448e-76	2.38122e-73
ANXA6	-1.1795	1.11083e-75	2.78248e-73
PTGIS	-1.34583	1.34918e-75	3.33675e-73
ASB2	-1.14665	1.373e-75	3.35322e-73
CLMP	-0.837429	1.52628e-75	3.68153e-73
GNAL	-0.748515	1.92816e-75	4.59418e-73
PCDH7	-0.993375	4.24414e-75	9.9906e-73
SYNPO2	-1.83605	8.46085e-75	1.9448e-72
SPARCL1	-1.47297	1.95783e-74	4.44791e-72
BMERB1	-0.960324	4.27271e-74	9.59542e-72
MYH11	-2.11502	4.64679e-74	1.03169e-71
HSPB8	-1.89713	5.01319e-74	1.10054e-71
SPON1	-1.29659	1.26116e-73	2.73785e-71
PRRX1	-1.14452	1.42788e-73	3.06571e-71
PRNP	-0.778056	1.8427e-73	3.91333e-71
ACTA2	-1.71461	2.75862e-73	5.78421e-71
VSTM4	-0.961633	2.78286e-73	5.78421e-71
FOXF1	-1.26411	4.0186e-73	8.26477e-71
PGM5	-1.85396	4.23241e-73	8.61384e-71
TMEM35A	-1.44731	7.2673e-73	1.4638e-70
DDR2	-1.05151	1.04136e-72	2.07614e-70
PDGFC	-1.01801	1.46046e-72	2.88227e-70
PDZRN4	-0.992661	2.96317e-72	5.78944e-70
LPAR1	-0.932866	3.21594e-72	6.22108e-70
MRGPRF	-1.41468	5.20953e-72	9.88191e-70
TIMP2	-1.1894	9.17154e-72	1.72302e-69
DKK3	-1.32445	1.04264e-71	1.9401e-69
AOX1	-1.32903	1.5988e-71	2.94506e-69
TGFB1I1	-1.29509	1.61286e-71	2.94506e-69
FLNC	-1.91868	1.62802e-71	2.9452e-69
MRC2	-1.07913	2.28953e-71	4.10392e-69
CTF1	-1.16446	2.42759e-71	4.31184e-69
MYOCD	-1.04141	2.68862e-71	4.73245e-69
ANGPT1	-0.969339	2.78544e-71	4.8591e-69
CNRIP1	-0.817631	4.25091e-71	7.34994e-69
FHL2	-1.24431	1.02295e-70	1.73795e-68
ISL1	-0.875689	1.28924e-70	2.17148e-68
JPH2	-1.36173	5.71569e-70	9.46383e-68
NPR2	-0.784492	5.98625e-70	9.82852e-68
MITF	-0.667791	9.2678e-70	1.49074e-67
APOBEC3C	-1.43066	9.30856e-70	1.49074e-67
C3orf70	-0.86708	1.73123e-69	2.72781e-67
PLSCR4	-0.875887	2.3741e-69	3.71082e-67
DENND2B	-0.836129	6.08263e-69	9.43194e-67
SYNM	-1.80736	6.30165e-69	9.69461e-67
KIRREL1	-0.934764	1.28098e-68	1.94014e-66
CCDC8	-1.07565	2.12424e-68	3.16819e-66
NES	-1.15552	2.26695e-68	3.35543e-66
ZNF185	-1.24219	2.42282e-68	3.55918e-66
EFEMP1	-1.32771	2.5345e-68	3.69546e-66
SLC12A4	-0.830912	3.84062e-68	5.55837e-66
EOGT	-0.705932	5.73364e-68	8.23705e-66
ITGA7	-1.19032	8.34312e-68	1.18984e-65
DACT3	-0.997387	9.5837e-68	1.35686e-65
SLC16A2	-0.858548	1.28839e-67	1.81098e-65
MMP14	-1.16649	1.68068e-67	2.34551e-65
EGFLAM	-0.69959	2.01986e-67	2.79887e-65
SYNPO	-1.08009	2.26898e-67	3.12192e-65
SYT11	-0.994235	2.34775e-67	3.20772e-65
RGN	-0.885067	3.12611e-67	4.24152e-65
GATM	-0.682825	3.83726e-67	5.17051e-65
SH3PXD2B	-0.811519	4.72597e-67	6.32438e-65
JAM2	-0.80342	5.5017e-67	7.26578e-65
SERPING1	-1.32508	5.50382e-67	7.26578e-65
GSN	-1.14984	1.26286e-66	1.65596e-64
FOXC1	-0.939957	1.74818e-66	2.26198e-64
RAB31	-0.97283	2.04377e-66	2.62705e-64
CDC42EP3	-0.948518	2.16604e-66	2.76602e-64
GNAO1	-0.644001	3.30701e-66	4.1956e-64
RUSC2	-0.738446	3.48117e-66	4.38807e-64
CFH	-1.00493	4.60763e-66	5.77076e-64
IL33	-1.14643	4.68333e-66	5.82822e-64
ARHGEF25	-1.07066	4.84906e-66	5.99626e-64
EFNB1	-0.831589	4.94069e-66	6.07114e-64
SVIL	-1.1321	6.29083e-66	7.68189e-64
VCL	-1.20109	7.18865e-66	8.72371e-64
MAMDC2	-0.783261	8.39713e-66	1.01273e-63
TCEAL2	-1.43618	9.26951e-66	1.11109e-63
FGFR1	-0.837311	9.69667e-66	1.1552e-63
PDE5A	-1.3357	1.12742e-65	1.335e-63
VSIR	-0.964388	1.4931e-65	1.75736e-63
ANKRD35	-0.873779	3.10295e-65	3.60866e-63
COL6A1	-1.24359	3.15178e-65	3.64376e-63
TPM1	-1.08669	3.26525e-65	3.75274e-63
GRIK5	-0.618243	3.32692e-65	3.80124e-63
CLDN11	-0.774588	3.59429e-65	4.08286e-63
ZNF516	-0.853585	4.48762e-65	5.06816e-63
PLEKHA2	-0.78928	5.26948e-65	5.91696e-63
RERG	-0.805165	5.34324e-65	5.9655e-63
TCEAL7	-0.929144	6.3872e-65	7.05045e-63
CLIP4	-0.733453	1.15343e-64	1.26605e-62
PRELP	-1.3773	1.23537e-64	1.34841e-62
ITGA9	-0.965624	1.3998e-64	1.51941e-62
ZNF423	-0.619494	1.50875e-64	1.62862e-62
PTGER2	-0.973084	1.54104e-64	1.65433e-62
TAGLN	-1.64187	1.7311e-64	1.84821e-62
PLN	-1.40966	2.19468e-64	2.30536e-62
RND3	-1.30169	2.29955e-64	2.4026e-62
TINAGL1	-1.0649	2.41652e-64	2.51138e-62
FHL1	-1.69212	2.53114e-64	2.61659e-62
DAAM2	-0.977022	2.58872e-64	2.66202e-62
CFL2	-0.897784	2.71517e-64	2.77743e-62
CNTN1	-1.17261	3.08169e-64	3.13594e-62
C1S	-1.38491	4.58083e-64	4.63732e-62
FBLN1	-1.50552	5.71542e-64	5.75608e-62
MCAM	-1.17179	5.78778e-64	5.79906e-62
MSN	-1.09509	6.00845e-64	5.98945e-62
ACSL4	-0.865668	1.05921e-63	1.0505e-61
SPEG	-0.826053	1.21828e-63	1.20216e-61
PLBD1	-0.80191	1.35022e-63	1.32566e-61
PCDH18	-0.951195	1.63405e-63	1.5963e-61
DPYSL2	-0.858254	2.14371e-63	2.07345e-61
LAYN	-0.873177	2.51309e-63	2.41875e-61
GPRC5B	-0.837691	2.77077e-63	2.6537e-61
LAMA4	-0.903215	3.04376e-63	2.90092e-61
ABCC9	-0.682457	3.20564e-63	3.04038e-61
ROR2	-1.12843	4.11139e-63	3.8806e-61
DNAJB5	-0.959376	5.53042e-63	5.19487e-61
KCNMA1	-1.00917	5.89305e-63	5.50901e-61
ZEB1	-0.836736	7.17247e-63	6.67313e-61
ARHGEF40	-0.702929	7.72547e-63	7.15357e-61
HAAO	-0.986312	1.02111e-62	9.41061e-61
ITGA1	-0.960143	1.07657e-62	9.82894e-61
CERK	-0.82891	1.34121e-62	1.21882e-60
ACACB	-0.628587	1.66979e-62	1.51039e-60
CES1	-1.46676	2.28889e-62	2.06085e-60
GLIS2	-0.869814	3.05392e-62	2.73704e-60
CD40	-1.06874	3.29058e-62	2.93568e-60
HLF	-0.893827	3.39142e-62	3.01189e-60
MMP2	-1.3115	3.55532e-62	3.14316e-60
AHNAK2	-0.815624	5.05075e-62	4.44512e-60
CX3CL1	-1.30547	5.98936e-62	5.24754e-60
OLFML1	-0.927874	6.05793e-62	5.28392e-60
CALD1	-1.14307	1.06099e-61	9.21318e-60
ACTN1	-0.951206	1.20186e-61	1.03902e-59
INMT	-1.20978	1.29644e-61	1.11276e-59
NYNRIN	-0.924005	1.29854e-61	1.11276e-59
ARHGAP10	-0.629798	1.36749e-61	1.16673e-59
MKX	-0.938407	1.73555e-61	1.47431e-59
CLU	-1.43726	2.08026e-61	1.7584e-59
C1QTNF1	-1.10393	2.08797e-61	1.7584e-59
PODN	-1.21728	2.51152e-61	2.10601e-59
GFPT2	-0.726449	2.81886e-61	2.35363e-59
HR	-0.611295	3.274e-61	2.69905e-59
MATN2	-1.19055	4.05017e-61	3.32488e-59
IGFBP4	-1.23861	4.08751e-61	3.3415e-59
PLS3	-0.960798	4.66023e-61	3.79382e-59
TCF21	-0.945208	5.96115e-61	4.83274e-59
LMO4	-0.71982	6.57812e-61	5.31088e-59
TWIST2	-0.991729	7.49488e-61	6.02613e-59
AOPEP	-0.691211	1.05744e-60	8.4328e-59
GAS7	-0.670547	1.12421e-60	8.92879e-59
GBP2	-1.13299	1.41111e-60	1.1162e-58
CORO1C	-0.762481	1.62501e-60	1.28022e-58
HSPB6	-1.76661	1.71464e-60	1.34541e-58
NID1	-1.15236	3.01266e-60	2.35445e-58
CSF1	-0.829755	4.20457e-60	3.24699e-58
SRD5A2	-1.29156	4.28881e-60	3.29901e-58
GLT8D2	-0.764122	4.70944e-60	3.60835e-58
POPDC2	-1.08093	5.70423e-60	4.35349e-58
CAND2	-0.599734	6.00779e-60	4.56732e-58
IFI16	-1.00319	7.10773e-60	5.38259e-58
PRKG1	-0.650472	8.55916e-60	6.43188e-58
ANO6	-0.951904	1.0452e-59	7.82415e-58
CNN1	-1.82921	1.23751e-59	9.22844e-58
NCS1	-0.913433	1.30944e-59	9.72773e-58
BOC	-0.898686	1.36718e-59	1.01181e-57
RCAN2	-1.08669	1.40504e-59	1.03591e-57
STARD8	-0.724778	1.84781e-59	1.35724e-57
RGL1	-0.826652	1.85485e-59	1.35731e-57
MAP1A	-0.775294	2.09428e-59	1.52679e-57
ADAMTS8	-0.6761	2.40141e-59	1.74419e-57
CSRP1	-1.29382	2.53384e-59	1.83356e-57
GLIS1	-0.803339	2.60492e-59	1.87804e-57
EMILIN3	-0.733109	3.29006e-59	2.35462e-57
CD248	-1.02614	4.09549e-59	2.92035e-57
RAB9B	-0.682598	4.67129e-59	3.31882e-57
TUBB6	-0.964863	6.35861e-59	4.50125e-57
RND2	-0.596462	8.56154e-59	6.0171e-57
NLGN3	-0.838131	8.61561e-59	6.0334e-57
SEC23A	-0.705303	1.25126e-58	8.70006e-57
NR2F1	-1.06404	1.57822e-58	1.08959e-56
GYPC	-0.944464	1.84038e-58	1.26611e-56
CSPG4	-0.960414	1.97182e-58	1.35177e-56
COL6A3	-1.24427	2.40096e-58	1.63653e-56
HOXD13	-1.18807	2.40396e-58	1.63653e-56
GAS6	-1.02864	2.71488e-58	1.83541e-56
COL4A6	-0.969386	2.85957e-58	1.92656e-56
FAM162B	-0.661654	2.97586e-58	1.99802e-56
ANO1	-1.02123	3.02546e-58	2.02436e-56
SULF2	-0.927993	3.17037e-58	2.11409e-56
DOK4	-0.735507	4.29401e-58	2.84394e-56
RARB	-0.679626	4.4565e-58	2.94159e-56
DACT1	-0.841329	4.97981e-58	3.27594e-56
GSTP1	-1.52301	7.10791e-58	4.61376e-56
NEURL1B	-0.801809	1.13959e-57	7.37261e-56
C1R	-1.28888	1.18886e-57	7.666e-56
MARVELD1	-1.02313	1.29338e-57	8.31251e-56
ETNK2	-0.706571	1.7661e-57	1.13135e-55
PAMR1	-1.04361	3.04597e-57	1.94484e-55
PLPP7	-0.675191	3.06482e-57	1.9505e-55
FEZ1	-0.606916	3.12357e-57	1.98144e-55
CAVIN2	-1.18943	3.61747e-57	2.28732e-55
OLFML2A	-0.87614	3.80185e-57	2.39614e-55
WFDC1	-1.10921	3.83662e-57	2.41029e-55
STING1	-1.03952	3.93109e-57	2.46172e-55
SHISAL1	-0.708039	4.16201e-57	2.598e-55
LIMS2	-1.16817	4.75108e-57	2.95626e-55
CALHM2	-0.752026	4.79303e-57	2.9729e-55
PDLIM7	-1.19039	7.61487e-57	4.69336e-55
GPR161	-0.700792	9.07388e-57	5.57501e-55
LTBP4	-1.22873	1.56455e-56	9.58248e-55
MYL9	-1.71568	2.08739e-56	1.27051e-54
SPOCK3	-1.37367	2.37423e-56	1.44061e-54
PCDH10	-0.93821	2.57732e-56	1.55419e-54
GJC1	-0.659334	2.62046e-56	1.57534e-54
AFAP1L2	-0.879316	2.85585e-56	1.71158e-54
PLPP3	-1.06245	2.90418e-56	1.73523e-54
GNAZ	-0.829551	3.35246e-56	1.99696e-54
ITGA5	-1.19153	3.55813e-56	2.11303e-54
QPRT	-0.76348	3.88085e-56	2.2977e-54
SERPINB1	-1.09194	4.24947e-56	2.50834e-54
LEPR	-0.668166	4.30227e-56	2.53186e-54
ADAM22	-0.754326	5.39165e-56	3.16342e-54
SFXN3	-0.766847	6.22537e-56	3.63078e-54
RAB7B	-0.730889	7.59515e-56	4.40338e-54
PAPLN	-0.689994	1.22546e-55	7.08372e-54
MR1	-0.701514	1.2894e-55	7.43133e-54
NAV2	-0.621629	1.57146e-55	9.03036e-54
ATP1A2	-1.42709	2.0399e-55	1.16197e-53
EPHA3	-1.23072	2.33915e-55	1.32856e-53
SFRP1	-1.32886	2.40535e-55	1.36219e-53
ADCY3	-0.733015	2.70411e-55	1.52256e-53
COL6A2	-1.13535	2.72214e-55	1.52831e-53
GPM6B	-0.778913	3.34391e-55	1.87202e-53
JPH4	-1.0916	3.41726e-55	1.90761e-53
MRAS	-0.635741	3.61699e-55	2.01335e-53
GSTM5	-0.825048	4.38993e-55	2.43666e-53
ACTG2	-1.9581	5.20069e-55	2.8785e-53
TGFBR2	-1.06983	5.28305e-55	2.91583e-53
MFGE8	-1.03164	6.39462e-55	3.51938e-53
OLFML3	-1.21247	6.41452e-55	3.52042e-53
ALDH1A2	-0.926115	6.65177e-55	3.6404e-53
GNG2	-0.624198	7.18575e-55	3.91511e-53
UBE2QL1	-0.690288	7.19381e-55	3.91511e-53
S100A16	-1.21475	7.48091e-55	4.06006e-53
WIPF1	-0.798584	8.86685e-55	4.7989e-53
KIFC3	-0.631462	1.23374e-54	6.60405e-53
PLCD3	-0.725405	1.52954e-54	8.14283e-53
RHOJ	-0.700966	1.79219e-54	9.48938e-53
SOX15	-0.846205	1.87951e-54	9.92483e-53
SMTN	-1.16733	2.03714e-54	1.07282e-52
EPB41L2	-0.792685	2.30009e-54	1.20804e-52
COL4A2	-1.16803	2.59418e-54	1.35885e-52
CCND2	-1.08352	3.27077e-54	1.70867e-52
LHFPL2	-0.642924	6.09361e-54	3.16641e-52
SGCB	-0.776535	6.11809e-54	3.1707e-52
COL16A1	-1.00424	7.73127e-54	3.98558e-52
PRIMA1	-0.827474	9.61286e-54	4.94253e-52
PYGM	-1.16749	1.00439e-53	5.15057e-52
LDB3	-1.26876	1.13984e-53	5.81467e-52
MCC	-0.828103	1.1544e-53	5.87361e-52
FXYD6	-1.04452	1.16686e-53	5.92157e-52
ATP1B2	-0.652589	2.10684e-53	1.06356e-51
CBX7	-0.662252	2.11353e-53	1.06356e-51
CTSB	-0.856058	2.11754e-53	1.06356e-51
DNAJB4	-0.879034	2.17391e-53	1.08908e-51
NFATC4	-0.687388	2.53354e-53	1.26101e-51
MAP3K20	-0.942615	2.53647e-53	1.26101e-51
CYS1	-0.759526	2.73096e-53	1.35425e-51
GSTM4	-0.705722	3.09077e-53	1.52494e-51
PLEKHO2	-0.751016	3.54e-53	1.74218e-51
MET	-0.965827	4.6297e-53	2.27274e-51
CYGB	-0.862664	4.68774e-53	2.29547e-51
TMEM51	-0.671863	5.17704e-53	2.52481e-51
FAIM2	-0.832399	5.18195e-53	2.52481e-51
ANO5	-0.670128	7.00944e-53	3.40673e-51
SLC2A4	-1.07843	1.82567e-52	8.74262e-51
NFASC	-0.598991	2.66006e-52	1.26762e-50
HSPB7	-1.25684	3.24188e-52	1.54111e-50
MASP1	-1.16662	3.46283e-52	1.64216e-50
TENT5B	-1.14618	3.47463e-52	1.64376e-50
RAB38	-0.61166	3.6156e-52	1.70632e-50
ZCCHC24	-0.665873	4.57952e-52	2.15083e-50
TMEM252	-0.912888	5.01166e-52	2.34815e-50
PDGFD	-0.833992	5.37994e-52	2.51467e-50
ACOX2	-0.836409	7.98179e-52	3.72192e-50
WIPF3	-0.628249	8.56414e-52	3.98395e-50
CRYAB	-1.42048	8.66409e-52	4.02088e-50
PHYHIP	-0.781632	9.14388e-52	4.23349e-50
PHLDB1	-0.625193	1.01336e-51	4.66957e-50
EFNA5	-0.786066	1.12173e-51	5.1568e-50
WWTR1	-0.707057	1.15908e-51	5.30352e-50
RARG	-0.807296	1.3516e-51	6.14129e-50
SGCA	-1.14776	1.43861e-51	6.52145e-50
MXRA5	-1.00066	1.46248e-51	6.61434e-50
SMARCD3	-0.827473	1.5462e-51	6.97683e-50
EHBP1L1	-0.828494	1.57016e-51	7.06861e-50
MYOF	-1.19535	2.11828e-51	9.51422e-50
EYA1	-0.873495	2.15839e-51	9.67216e-50
DST	-0.85604	2.33271e-51	1.04294e-49
DES	-1.92077	4.19813e-51	1.85994e-49
KCTD17	-0.729436	5.65702e-51	2.50061e-49
FHOD3	-0.856246	6.59033e-51	2.90659e-49
ARHGEF2	-0.602972	6.97725e-51	3.07031e-49
ANGPTL1	-0.749871	7.10423e-51	3.11915e-49
FAM107A	-1.2102	9.04107e-51	3.96064e-49
TNC	-1.2477	1.05095e-50	4.57316e-49
TNFAIP8L3	-0.676725	1.30288e-50	5.65681e-49
FABP3	-1.30789	1.41718e-50	6.13945e-49
ECM2	-0.766098	1.65725e-50	7.14777e-49
FST	-1.00773	1.88167e-50	8.09781e-49
CLIC4	-0.920675	2.43557e-50	1.04585e-48
SCN7A	-0.787883	2.70234e-50	1.15786e-48
PPP1R3C	-1.04293	3.77864e-50	1.61547e-48
NTN1	-0.808176	4.18932e-50	1.78714e-48
C7	-1.57891	6.52652e-50	2.77207e-48
ATCAY	-0.623418	1.02898e-49	4.3235e-48
TSHZ3	-0.740984	1.10137e-49	4.61771e-48
LTBP1	-1.09372	1.10396e-49	4.61868e-48
GFRA1	-0.645971	1.27653e-49	5.32923e-48
RSPO3	-0.878795	1.3542e-49	5.62943e-48
LDB2	-0.685472	2.23969e-49	9.23188e-48
ADAM33	-0.842089	2.75197e-49	1.12958e-47
COL8A2	-0.887968	2.78205e-49	1.13953e-47
COPZ2	-0.961446	2.80638e-49	1.1471e-47
GLI3	-0.599032	2.96279e-49	1.20849e-47
INPP5D	-0.72124	3.7354e-49	1.5173e-47
C20orf194	-0.585257	4.56018e-49	1.84084e-47
NRP2	-0.73987	4.59215e-49	1.84992e-47
PDLIM1	-1.02654	5.1999e-49	2.09044e-47
FILIP1L	-1.26744	5.92576e-49	2.37736e-47
LHFPL6	-0.898957	8.01849e-49	3.20379e-47
TCN2	-0.726241	8.08229e-49	3.22269e-47
NLRP1	-0.629526	9.08903e-49	3.61673e-47
CPED1	-1.01389	1.00848e-48	3.99667e-47
CAP2	-0.920188	1.01399e-48	4.01038e-47
TPM2	-1.62795	1.46561e-48	5.7385e-47
SORCS2	-0.587394	1.55079e-48	6.05985e-47
CCDC80	-1.09898	2.26126e-48	8.80088e-47
B3GALT2	-0.637229	2.57549e-48	1.0004e-46
TSPAN7	-0.860558	3.11024e-48	1.20332e-46
CELF2	-0.788679	3.14709e-48	1.21517e-46
CNTNAP1	-0.658942	3.32609e-48	1.27923e-46
CHST11	-0.636404	3.46432e-48	1.32978e-46
S100A6	-1.29823	3.48884e-48	1.33657e-46
CNN2	-0.932965	3.61542e-48	1.38235e-46
KCNH2	-0.805826	3.83959e-48	1.46519e-46
ARHGEF17	-0.736148	5.07087e-48	1.92752e-46
SDC3	-0.673306	5.37801e-48	2.0403e-46
GAS1	-1.11659	6.45219e-48	2.43835e-46
PRKCB	-0.678261	7.37809e-48	2.78288e-46
COL14A1	-1.16911	9.18381e-48	3.45729e-46
RASGRP2	-0.632722	9.80278e-48	3.67614e-46
SNAI2	-1.20791	1.12013e-47	4.19254e-46
ARL4C	-0.865596	1.12635e-47	4.20775e-46
GNG11	-0.792865	1.12877e-47	4.20875e-46
FCHSD2	-0.615703	1.45302e-47	5.38692e-46
FBLN5	-1.03472	2.02254e-47	7.44187e-46
ADAM19	-0.586232	2.11661e-47	7.77337e-46
SMOC1	-1.39849	2.98151e-47	1.08884e-45
RPRM	-0.922239	3.18509e-47	1.15885e-45
PRRX2	-0.934834	6.0011e-47	2.14743e-45
VIM	-0.943397	6.12939e-47	2.18932e-45
LGALS1	-1.14998	6.60543e-47	2.35505e-45
PDE4A	-0.649133	7.03545e-47	2.5038e-45
PPIC	-0.841534	7.40244e-47	2.62484e-45
SGCE	-0.856538	8.08839e-47	2.86288e-45
DCN	-1.28171	9.1457e-47	3.22543e-45
SPRED1	-0.635036	9.80247e-47	3.44461e-45
LMCD1	-0.677492	9.92068e-47	3.4779e-45
RARRES2	-1.30896	9.93279e-47	3.4779e-45
PDE2A	-0.59883	1.11165e-46	3.87847e-45
BMP4	-0.892531	1.41968e-46	4.93553e-45
CRISPLD2	-1.03747	1.57081e-46	5.44157e-45
PDGFRB	-0.996605	1.71792e-46	5.94066e-45
DENND2A	-0.636668	1.85309e-46	6.39676e-45
SRPX	-1.01519	2.30928e-46	7.94343e-45
CLIP2	-0.62403	2.38448e-46	8.18768e-45
SH3PXD2A	-0.76139	2.66166e-46	9.12342e-45
ITGB4	-1.23685	2.68372e-46	9.18294e-45
ABCA8	-0.621763	3.11602e-46	1.06064e-44
GPX3	-1.34258	3.22315e-46	1.0952e-44
C12orf75	-0.947614	3.3913e-46	1.15033e-44
IGFBP7	-1.01602	4.43682e-46	1.49977e-44
MFAP4	-1.29887	5.28106e-46	1.78206e-44
TLN1	-0.704318	5.98615e-46	2.01651e-44
EFHD1	-0.867394	6.37079e-46	2.14238e-44
ECRG4	-1.28253	6.79829e-46	2.28222e-44
ST6GALNAC4	-0.692328	7.45927e-46	2.49553e-44
MBNL2	-0.86106	7.57679e-46	2.53052e-44
AKR1B1	-0.886076	9.94511e-46	3.31018e-44
MYZAP	-0.775326	9.99848e-46	3.32229e-44
PCOLCE	-0.972323	1.04908e-45	3.47994e-44
RBM38	-0.749909	1.08957e-45	3.60813e-44
JDP2	-0.586516	1.33324e-45	4.40759e-44
FOXO1	-0.601297	1.74413e-45	5.75621e-44
EDIL3	-0.807693	2.21673e-45	7.29133e-44
PTGDS	-1.75558	2.39797e-45	7.87422e-44
RBFOX3	-0.779235	5.7803e-45	1.88226e-43
SIRPA	-0.681186	6.49428e-45	2.11123e-43
FBN1	-0.881082	6.5073e-45	2.11195e-43
RBMS1	-0.597107	1.18308e-44	3.82697e-43
NXPH3	-0.767665	1.2567e-44	4.05843e-43
RASA3	-0.599488	1.70573e-44	5.49038e-43
ETS2	-1.13461	2.06021e-44	6.58794e-43
HTRA1	-0.820709	2.21595e-44	7.07437e-43
SAMD4A	-0.60807	2.49707e-44	7.94589e-43
CHST15	-0.787065	2.66357e-44	8.46192e-43
PPP1R18	-0.780269	2.97878e-44	9.44795e-43
DYSF	-0.642965	3.21576e-44	1.01666e-42
ELF4	-0.708611	3.42896e-44	1.08231e-42
ADA2	-0.931126	3.6326e-44	1.14474e-42
HHIP	-0.708082	4.32227e-44	1.35988e-42
PNMA1	-0.892359	4.62848e-44	1.45388e-42
B3GNT8	-0.656028	5.10875e-44	1.60216e-42
ZYX	-0.719284	5.43378e-44	1.70137e-42
HOXD10	-0.843609	5.76802e-44	1.80313e-42
HOXD11	-0.665877	8.09766e-44	2.52332e-42
ISLR	-1.05257	8.75296e-44	2.72318e-42
AQP1	-0.993696	1.02084e-43	3.1659e-42
DCHS1	-0.86114	1.88098e-43	5.77838e-42
SERPINB9	-0.685953	2.18456e-43	6.70047e-42
MEF2C	-0.696018	2.33537e-43	7.14061e-42
REEP2	-0.701531	2.47488e-43	7.54357e-42
AEBP1	-1.20151	3.83927e-43	1.16659e-41
MYADM	-0.863907	4.08612e-43	1.23775e-41
PLIN4	-0.936956	5.04855e-43	1.52455e-41
ZBTB47	-0.62071	5.41874e-43	1.63382e-41
B3GNT9	-0.788854	5.45823e-43	1.64319e-41
LRRN4CL	-0.672015	7.24296e-43	2.16381e-41
TMEM47	-0.907961	7.51287e-43	2.24101e-41
CFI	-0.820647	7.56737e-43	2.25383e-41
C1QTNF7	-0.667691	8.21424e-43	2.43905e-41
MAP1B	-1.05853	9.414e-43	2.79106e-41
PDGFRA	-0.776308	1.02576e-42	3.03657e-41
SSC5D	-0.813924	1.1451e-42	3.37959e-41
CASP1	-0.691034	1.22872e-42	3.62093e-41
IL34	-0.651139	1.33148e-42	3.91785e-41
RAB34	-0.98645	1.36435e-42	4.00852e-41
EMP3	-0.874446	1.39752e-42	4.09982e-41
CYYR1	-0.704079	1.68734e-42	4.9426e-41
APOBEC3G	-0.635714	2.21078e-42	6.46621e-41
WSCD2	-0.615054	2.23264e-42	6.52037e-41
STEAP3	-0.745393	3.12706e-42	9.09174e-41
PFKFB3	-0.811478	3.94751e-42	1.14261e-40
ECM1	-0.742874	5.33654e-42	1.54239e-40
FCER1A	-0.874744	5.38993e-42	1.55552e-40
TGFBI	-0.85108	5.90352e-42	1.70122e-40
ZNF853	-0.647449	6.04004e-42	1.738e-40
MDFIC	-0.644603	6.3335e-42	1.81976e-40
F10	-0.848298	7.5381e-42	2.15321e-40
ROBO1	-0.824292	9.67539e-42	2.74764e-40
CYP27A1	-1.5284	9.71608e-42	2.75519e-40
CYTL1	-0.835123	1.04012e-41	2.94521e-40
CTSK	-0.972521	1.07709e-41	3.04107e-40
CAPN6	-0.983154	1.15497e-41	3.25626e-40
TACC1	-0.849542	1.25072e-41	3.52111e-40
EPAS1	-0.886962	1.27821e-41	3.59335e-40
JAM3	-0.951062	1.47351e-41	4.13047e-40
ABCB1	-0.68154	1.49639e-41	4.18861e-40
TIMP3	-0.699648	1.74051e-41	4.85801e-40
SRGN	-0.991646	2.16675e-41	6.03909e-40
SLC14A1	-1.59214	2.26679e-41	6.3089e-40
PPP1R14A	-1.19338	2.31997e-41	6.44773e-40
CPVL	-0.811639	2.88513e-41	7.96363e-40
PAQR8	-0.598483	2.88579e-41	7.96363e-40
C1orf54	-0.737919	2.96925e-41	8.18241e-40
SNX7	-0.74672	3.64791e-41	1.00102e-39
PCP4	-1.60294	3.88551e-41	1.06473e-39
KCNAB1	-0.817781	7.60687e-41	2.07574e-39
ID3	-1.18117	7.78852e-41	2.12235e-39
CPXM1	-1.08504	8.26048e-41	2.24782e-39
RARRES1	-1.5325	8.86696e-41	2.4095e-39
ANTXR1	-1.06221	8.96652e-41	2.43316e-39
ACSF2	-0.826714	9.43873e-41	2.55775e-39
LRCH2	-0.732945	9.56446e-41	2.58823e-39
MAML2	-0.744596	1.0022e-40	2.70831e-39
TBC1D1	-0.650821	1.17728e-40	3.17702e-39
FGFR2	-1.08965	1.44956e-40	3.90103e-39
CSF1R	-0.845177	2.17693e-40	5.85046e-39
NCAM1	-0.702644	2.23855e-40	5.99956e-39
FHL3	-0.723306	2.25251e-40	6.0287e-39
DMD	-0.70601	2.31211e-40	6.1713e-39
STAC	-0.833808	2.37803e-40	6.3386e-39
NDRG2	-0.80996	2.75652e-40	7.32747e-39
COL23A1	-0.656046	2.94122e-40	7.80783e-39
CYP4B1	-1.19945	2.94763e-40	7.81421e-39
MRAP2	-0.704733	3.64362e-40	9.63315e-39
SOX7	-0.649846	3.75443e-40	9.91272e-39
ANP32E	-0.731905	3.86188e-40	1.01826e-38
CDC42EP4	-0.611667	4.65369e-40	1.22045e-38
AJUBA	-0.707574	5.56029e-40	1.45237e-38
GPX8	-0.736981	6.66919e-40	1.73737e-38
LAMA2	-0.742446	6.7324e-40	1.7515e-38
GEM	-1.12955	7.46488e-40	1.93948e-38
TSPAN4	-0.646721	8.3804e-40	2.17445e-38
ID4	-1.20505	9.30613e-40	2.41145e-38
PAM	-0.741355	1.24786e-39	3.22496e-38
PRDM8	-1.26894	1.27619e-39	3.29382e-38
COL5A1	-0.935418	1.29811e-39	3.34157e-38
DIPK2B	-0.620381	1.45579e-39	3.72292e-38
MAPRE2	-0.693732	1.67899e-39	4.28811e-38
CD200	-0.788487	1.75196e-39	4.46863e-38
KIAA1210	-0.904842	1.87689e-39	4.78105e-38
NGFR	-1.00845	1.93473e-39	4.92197e-38
TRIM22	-0.911613	2.46102e-39	6.23649e-38
SPRY2	-0.634856	2.49628e-39	6.3095e-38
IP6K3	-0.673428	2.97072e-39	7.48929e-38
SPRY1	-0.893761	3.15067e-39	7.9327e-38
SELP	-0.788622	3.41278e-39	8.58158e-38
FGL2	-0.857436	3.99189e-39	9.99918e-38
OXER1	-0.672832	4.19026e-39	1.04826e-37
PGAP4	-0.77992	4.46883e-39	1.1151e-37
KLHL5	-0.702548	5.06814e-39	1.26142e-37
TMOD1	-0.638721	5.25843e-39	1.30711e-37
LTBP2	-0.983621	5.98576e-39	1.48413e-37
FBLIM1	-0.586223	7.03035e-39	1.74093e-37
TLR3	-0.601547	7.35256e-39	1.81841e-37
ACVRL1	-0.598046	9.38e-39	2.31105e-37
P2RX1	-0.859516	1.04687e-38	2.57603e-37
HLA-DOA	-0.893457	1.16652e-38	2.86324e-37
RASL11A	-1.04521	1.21525e-38	2.97911e-37
MOXD1	-1.04525	1.36086e-38	3.31942e-37
TP63	-1.2274	1.37815e-38	3.35322e-37
HSD11B1	-0.849204	1.43474e-38	3.48223e-37
RASD2	-0.7863	1.56888e-38	3.80307e-37
PLP2	-0.876402	1.57841e-38	3.82142e-37
EMCN	-0.668975	1.66301e-38	4.02127e-37
LMO2	-0.615851	1.83834e-38	4.43974e-37
NDNF	-0.988022	1.94646e-38	4.69505e-37
ILK	-0.619656	2.02963e-38	4.88963e-37
FGF7	-0.70629	2.03439e-38	4.89507e-37
PLXND1	-0.676044	2.06915e-38	4.97258e-37
UNC5B	-0.810963	2.12827e-38	5.10836e-37
CA11	-0.802476	2.20288e-38	5.28098e-37
RBP1	-0.814712	2.31816e-38	5.55052e-37
TRIP6	-0.866426	2.74258e-38	6.53471e-37
CSDC2	-0.797275	3.23753e-38	7.69524e-37
PBX1	-0.624341	3.79014e-38	8.98686e-37
COL17A1	-1.22718	4.92556e-38	1.16367e-36
GSTM2	-0.72577	5.05864e-38	1.19367e-36
CHST2	-0.84171	5.50994e-38	1.29859e-36
SLC16A5	-0.965509	5.81905e-38	1.36979e-36
ITGA8	-1.24926	6.20467e-38	1.45881e-36
COL18A1	-0.715245	6.39597e-38	1.50198e-36
OPTN	-0.733789	8.19653e-38	1.92019e-36
NDP	-0.794151	1.10794e-37	2.58934e-36
TGFB1	-0.769535	1.31109e-37	3.04953e-36
RFTN1	-0.741199	1.48075e-37	3.44007e-36
MAN1A1	-0.879785	1.49707e-37	3.47385e-36
LPCAT2	-0.588266	1.67826e-37	3.88504e-36
TAMALIN	-0.81404	1.7357e-37	4.01326e-36
MFAP2	-0.727727	1.79444e-37	4.14419e-36
ZFP36L1	-0.893254	2.10628e-37	4.85862e-36
SPSB1	-0.835793	2.25612e-37	5.192e-36
ABCG2	-0.649726	2.41299e-37	5.54646e-36
ARL4D	-0.879791	2.72202e-37	6.24212e-36
COX7A1	-1.19317	2.84296e-37	6.50419e-36
A2M	-1.08397	2.90807e-37	6.63761e-36
SLC40A1	-0.910946	5.11251e-37	1.16284e-35
CERCAM	-0.653117	5.331e-37	1.21113e-35
GBP1	-0.897918	5.59374e-37	1.26934e-35
AVPI1	-0.820042	6.01162e-37	1.36259e-35
ANXA2	-0.922663	7.1234e-37	1.61271e-35
VAMP5	-0.894599	8.63529e-37	1.94822e-35
CCDC3	-0.948686	1.03315e-36	2.31488e-35
DPYD	-0.729517	1.9176e-36	4.26721e-35
GATA3	-1.04321	2.09667e-36	4.66037e-35
SLC46A3	-0.629129	2.2965e-36	5.09875e-35
PCP4L1	-0.920826	2.46423e-36	5.45875e-35
MMRN2	-0.654172	2.57129e-36	5.68946e-35
TNFRSF1B	-0.784224	3.33775e-36	7.3687e-35
FBXO32	-0.714945	4.4129e-36	9.73129e-35
TUBA1A	-0.885177	4.6104e-36	1.01554e-34
TMEM176A	-0.747493	5.29516e-36	1.16505e-34
UST	-0.635107	6.0862e-36	1.3331e-34
SERTM2	-1.14309	8.38627e-36	1.82462e-34
EVA1C	-0.733992	8.57397e-36	1.86338e-34
PKIG	-0.674775	9.30657e-36	2.01621e-34
COL4A1	-1.03102	9.30815e-36	2.01621e-34
SLC22A17	-0.808243	1.13765e-35	2.45879e-34
RASSF5	-0.648242	1.2276e-35	2.65025e-34
TEAD1	-0.684116	1.28365e-35	2.76821e-34
AMOTL2	-0.785489	1.55239e-35	3.34405e-34
KIT	-0.647144	1.55876e-35	3.35408e-34
LGALS3	-1.07736	1.90416e-35	4.08381e-34
IL27RA	-0.609596	2.00511e-35	4.29559e-34
PLXDC2	-0.667581	2.69907e-35	5.75704e-34
WFDC2	-1.74374	2.7957e-35	5.95016e-34
FLRT3	-1.09199	3.21142e-35	6.80528e-34
PNCK	-0.719582	3.80849e-35	8.04435e-34
APOL1	-0.990421	4.01957e-35	8.47963e-34
LOXL1	-0.640045	5.01611e-35	1.05609e-33
ELN	-1.03742	5.87316e-35	1.23122e-33
CD34	-0.658581	6.45371e-35	1.35003e-33
CCN2	-1.33459	6.71666e-35	1.40203e-33
LOXL2	-0.614575	7.59567e-35	1.58213e-33
S1PR1	-0.758751	8.97873e-35	1.86425e-33
TIMP1	-1.0489	1.05601e-34	2.18563e-33
TRIM29	-1.38289	1.06131e-34	2.19428e-33
ITM2C	-0.85839	1.31626e-34	2.71277e-33
EPHA2	-0.91398	1.33075e-34	2.73974e-33
KRT23	-1.31289	1.61551e-34	3.30511e-33
LYNX1	-0.609933	1.81376e-34	3.70295e-33
CAVIN3	-0.918333	1.95549e-34	3.98814e-33
CAPG	-0.987842	1.97483e-34	4.02337e-33
RBPMS2	-0.784505	2.14606e-34	4.36313e-33
ANGPTL2	-0.940785	2.33429e-34	4.73597e-33
SPART	-0.827555	2.471e-34	5.00812e-33
LAMB3	-1.48776	2.47798e-34	5.01708e-33
ACTC1	-1.4302	2.73771e-34	5.52576e-33
ABI3BP	-0.589195	2.8185e-34	5.68296e-33
COL15A1	-0.940265	2.95307e-34	5.94815e-33
CEND1	-0.592619	3.00206e-34	6.0406e-33
SH3BGR	-0.762671	3.22513e-34	6.47612e-33
ITGB6	-0.785561	3.39631e-34	6.81285e-33
NTN4	-1.10173	4.45377e-34	8.88843e-33
HLA-E	-0.779818	4.46882e-34	8.90937e-33
STAB1	-0.624487	5.96164e-34	1.18734e-32
LTBP3	-0.648558	7.06784e-34	1.40623e-32
CDH11	-0.763744	7.48054e-34	1.48682e-32
GPR87	-0.932273	1.05903e-33	2.09215e-32
TES	-0.618916	1.26592e-33	2.49581e-32
TGFB3	-1.10026	1.34964e-33	2.65552e-32
GIMAP4	-0.723074	1.38385e-33	2.72008e-32
LUM	-1.23394	1.39748e-33	2.74411e-32
APBB1	-0.588071	2.00077e-33	3.9091e-32
ADGRL4	-0.684034	2.38089e-33	4.62403e-32
TMEM176B	-0.984577	2.39828e-33	4.64917e-32
DPT	-1.34135	2.39859e-33	4.64917e-32
FIBIN	-0.987001	3.32246e-33	6.40811e-32
KANK1	-0.597059	3.44175e-33	6.63165e-32
SULF1	-1.05114	4.01696e-33	7.71715e-32
A4GALT	-0.655355	5.33008e-33	1.01997e-31
ZFP36L2	-0.918569	5.63807e-33	1.0768e-31
COL27A1	-0.620718	7.58765e-33	1.4421e-31
TGFB2	-0.803585	7.84825e-33	1.48855e-31
BCL2	-0.730321	7.85495e-33	1.48855e-31
MVP	-0.638407	8.87234e-33	1.67648e-31
COL1A2	-1.06985	1.05703e-32	1.99155e-31
P3H3	-0.847969	1.26946e-32	2.38718e-31
ITGA3	-0.68409	1.44487e-32	2.7066e-31
SNCG	-1.12469	1.48032e-32	2.77035e-31
GLIPR1	-0.619561	1.5114e-32	2.82582e-31
CHRDL2	-0.937336	1.63247e-32	3.04053e-31
CD93	-0.805443	1.68045e-32	3.12692e-31
PTGS1	-0.84553	1.90119e-32	3.52758e-31
ELK3	-0.599231	1.9347e-32	3.58635e-31
BDH2	-0.699716	2.05469e-32	3.80517e-31
CD207	-0.716959	2.10089e-32	3.88705e-31
GGT6	-0.942148	2.16556e-32	4.0029e-31
TNS4	-1.37186	2.20034e-32	4.06336e-31
SCRN1	-0.814331	2.32215e-32	4.2802e-31
IER5	-0.685096	3.09308e-32	5.6691e-31
SYNGR1	-0.610414	3.16753e-32	5.8001e-31
CYBA	-0.854012	3.46309e-32	6.32353e-31
DIXDC1	-0.637869	3.83658e-32	6.99245e-31
EFS	-1.05541	4.22515e-32	7.68631e-31
PAGE4	-1.33905	4.25446e-32	7.73244e-31
FBLN2	-1.05928	4.28089e-32	7.77324e-31
GGT5	-0.710236	4.67424e-32	8.45605e-31
RHOB	-0.931019	6.163e-32	1.10979e-30
TRNP1	-0.612576	7.71288e-32	1.38252e-30
PLCL1	-0.617173	8.4224e-32	1.50831e-30
SH3BGRL	-0.857379	1.04532e-31	1.86515e-30
RNASE6	-0.73388	1.22713e-31	2.18357e-30
PXDC1	-0.693895	1.46184e-31	2.59413e-30
SFRP2	-1.21646	1.63524e-31	2.89658e-30
LGR6	-0.69326	1.81645e-31	3.21175e-30
IGFBP6	-1.22034	2.75599e-31	4.85104e-30
DMKN	-0.715595	2.94109e-31	5.16754e-30
HOXB2	-0.636253	3.14221e-31	5.50606e-30
LPP	-0.648727	3.67296e-31	6.40736e-30
PDLIM4	-0.886986	3.85642e-31	6.71539e-30
RUNX1	-0.610541	3.86062e-31	6.71672e-30
CPA6	-0.782634	4.06917e-31	7.07325e-30
C3	-1.30743	4.88517e-31	8.44658e-30
TMEM119	-0.843267	6.30854e-31	1.08692e-29
GSTM3	-0.804846	8.28663e-31	1.42271e-29
PDK4	-1.29497	8.59587e-31	1.47451e-29
QSOX1	-0.726102	8.82431e-31	1.50971e-29
HLA-DPB1	-0.877392	8.85033e-31	1.51284e-29
ADRA1D	-0.643362	1.32443e-30	2.25014e-29
PLA2G4A	-0.627673	1.35204e-30	2.29507e-29
OMD	-0.739172	1.90437e-30	3.21865e-29
NDN	-0.624548	2.18818e-30	3.68557e-29
DUOX1	-0.709171	2.40946e-30	4.0513e-29
S100A4	-1.04083	2.93562e-30	4.91483e-29
ARMCX1	-1.05847	2.97268e-30	4.97262e-29
S1PR3	-0.698477	3.42343e-30	5.71195e-29
THSD4	-0.886972	3.76375e-30	6.26372e-29
C16orf89	-0.723719	5.41261e-30	8.9696e-29
MAL	-0.696884	5.67769e-30	9.40091e-29
MPZL2	-0.705766	5.8111e-30	9.61365e-29
TLR4	-0.650777	7.21361e-30	1.19137e-28
STUM	-0.597681	7.77578e-30	1.28097e-28
HLA-DPA1	-0.895078	1.12355e-29	1.84315e-28
PECAM1	-0.725786	1.14655e-29	1.87931e-28
SPARC	-0.953215	1.24249e-29	2.03314e-28
DUOXA1	-0.720378	1.25983e-29	2.0598e-28
STAC2	-0.716862	1.26927e-29	2.07349e-28
CD74	-0.925985	1.44108e-29	2.3522e-28
LAPTM4B	-0.801654	1.49475e-29	2.43573e-28
PCOLCE2	-0.848258	1.51504e-29	2.46674e-28
ARRDC2	-0.657775	1.56346e-29	2.54345e-28
ITGB8	-0.608952	1.73588e-29	2.81691e-28
KDR	-0.755604	1.90485e-29	3.08599e-28
CRIM1	-0.695718	2.85487e-29	4.59839e-28
SLITRK6	-0.692743	2.87813e-29	4.63204e-28
RNASE1	-0.719958	2.89421e-29	4.65408e-28
MGP	-1.03506	3.06523e-29	4.92504e-28
EDNRB	-0.854247	3.1214e-29	5.00705e-28
GPSM3	-0.720551	3.5483e-29	5.65932e-28
PLEKHO1	-0.663032	3.7128e-29	5.91203e-28
NR3C1	-0.621111	3.74364e-29	5.95629e-28
CASQ2	-0.854133	3.91744e-29	6.22268e-28
SCNN1A	-1.09797	4.59789e-29	7.27398e-28
PLAU	-0.72435	4.82908e-29	7.62121e-28
PLEKHA4	-0.689545	5.31625e-29	8.36977e-28
ZNF655	-0.808786	6.04403e-29	9.49129e-28
IL6ST	-0.619824	6.23389e-29	9.75943e-28
S100A14	-1.142	6.28793e-29	9.83615e-28
FXYD5	-0.711065	6.8943e-29	1.07589e-27
IFI27L2	-0.774268	7.40481e-29	1.15463e-27
S100B	-0.752433	7.71148e-29	1.20149e-27
TRPV4	-0.653483	8.4282e-29	1.31211e-27
FMO2	-0.605199	8.58296e-29	1.33302e-27
SLC29A1	-0.618071	9.27773e-29	1.43864e-27
AHR	-0.77073	9.35276e-29	1.44912e-27
ID1	-1.33887	9.38706e-29	1.45328e-27
PNMA8A	-0.771842	1.07138e-28	1.65344e-27
CLEC10A	-0.637163	1.39419e-28	2.14824e-27
IGFBP5	-0.996507	1.52205e-28	2.33972e-27
CACNA1H	-0.926569	1.6377e-28	2.51156e-27
EDN3	-0.597833	1.67953e-28	2.5737e-27
GIMAP7	-0.711352	1.74666e-28	2.67447e-27
ETS1	-0.739435	1.80786e-28	2.76384e-27
INKA1	-0.684359	2.06706e-28	3.15763e-27
ANXA1	-0.946466	2.18223e-28	3.33097e-27
PRKCA	-0.638323	2.25595e-28	3.43545e-27
HCLS1	-0.66231	3.20893e-28	4.86393e-27
GADD45A	-0.710695	4.28683e-28	6.47766e-27
MS4A6A	-0.613161	4.88461e-28	7.36385e-27
G0S2	-0.766817	5.11858e-28	7.70468e-27
ATP1B1	-0.859755	5.24152e-28	7.88366e-27
POGLUT3	-0.590779	7.34903e-28	1.0919e-26
DIO2	-0.772079	7.79152e-28	1.15589e-26
KCTD14	-0.607135	8.45633e-28	1.25261e-26
KRT5	-1.8214	8.55145e-28	1.26574e-26
CPQ	-0.603321	1.2466e-27	1.83267e-26
SLC2A5	-0.918375	1.54188e-27	2.26166e-26
COL3A1	-1.08369	1.70004e-27	2.48991e-26
CH25H	-0.782512	2.16531e-27	3.16186e-26
ABCC3	-0.599952	2.29717e-27	3.34441e-26
HEG1	-0.649669	3.23061e-27	4.67206e-26
HOPX	-0.592886	4.21413e-27	6.05855e-26
IFITM3	-0.822492	4.8933e-27	7.00918e-26
KLF5	-0.832657	6.19177e-27	8.80456e-26
PIK3R1	-0.593364	6.30452e-27	8.95838e-26
CXCL12	-0.77625	7.80876e-27	1.10636e-25
NUAK1	-0.631328	9.21899e-27	1.30333e-25
DMPK	-0.639283	1.0109e-26	1.42606e-25
CDH3	-0.873379	1.10324e-26	1.55408e-25
DLK2	-0.931238	1.13552e-26	1.59725e-25
ATOH8	-0.724697	1.6647e-26	2.32986e-25
HTRA3	-0.852829	1.72948e-26	2.41879e-25
TUBA4A	-0.753528	1.77036e-26	2.47419e-25
MPZ	-0.644176	1.99694e-26	2.78289e-25
MAOB	-1.23613	2.09852e-26	2.92237e-25
FN1	-0.986929	2.16144e-26	3.00571e-25
THBD	-0.792002	2.51607e-26	3.4914e-25
SBSPON	-0.691032	3.05113e-26	4.21889e-25
ALOX5AP	-0.628245	3.2666e-26	4.49141e-25
ADGRL2	-0.822252	3.35806e-26	4.61067e-25
GABRE	-0.706928	4.33117e-26	5.90938e-25
ANKRD65	-0.657139	4.37747e-26	5.96615e-25
TNFAIP2	-0.982739	5.62443e-26	7.60485e-25
GJB5	-0.73055	5.98733e-26	8.08435e-25
PROK1	-1.03222	6.0253e-26	8.12999e-25
PROCR	-0.619495	6.09169e-26	8.2139e-25
RRAS	-0.6825	7.01594e-26	9.4082e-25
GPC3	-0.644266	7.0421e-26	9.43679e-25
VCAM1	-0.670742	8.03881e-26	1.07503e-24
ENPP2	-0.714984	8.66858e-26	1.15767e-24
MXRA8	-0.676783	1.04712e-25	1.39363e-24
GPR183	-0.848636	1.11082e-25	1.47641e-24
PLTP	-0.948385	1.19758e-25	1.58956e-24
CTSS	-0.818958	1.20167e-25	1.59391e-24
VTCN1	-0.73059	1.23133e-25	1.63214e-24
MPEG1	-0.763749	1.67784e-25	2.20752e-24
GJB3	-0.612053	1.72245e-25	2.26468e-24
PRR36	0.600179	1.87022e-25	2.45732e-24
HPN	0.910507	2.25493e-25	2.94301e-24
CD14	-0.698266	2.49513e-25	3.24566e-24
CPA3	-0.91713	2.66983e-25	3.4683e-24
CD53	-0.765348	2.89476e-25	3.75052e-24
ACKR1	-1.04039	3.23698e-25	4.18281e-24
CCL21	-1.21334	3.93916e-25	5.07004e-24
ARID5A	-0.791696	4.07789e-25	5.2417e-24
PHLDA1	-0.653692	4.90453e-25	6.27536e-24
IFITM2	-0.723906	5.66992e-25	7.24045e-24
CNTFR	-0.595218	6.09277e-25	7.77028e-24
EVI2B	-0.692483	7.619e-25	9.6914e-24
GPX7	-0.703352	1.16638e-24	1.47214e-23
ADAMTSL3	-0.59053	1.32008e-24	1.66077e-23
HLA-DRA	-0.91248	1.48029e-24	1.85634e-23
AKAP12	-0.802281	1.51449e-24	1.8968e-23
PID1	-0.671935	1.75589e-24	2.19492e-23
DLL1	-0.648508	1.90536e-24	2.37872e-23
STX19	0.654456	2.17528e-24	2.70704e-23
AIF1	-0.719439	2.42845e-24	3.01251e-23
TNFAIP3	-0.797911	2.52006e-24	3.12219e-23
LRRC32	-0.641464	2.70692e-24	3.34733e-23
ITGA2	-0.637525	2.76631e-24	3.41644e-23
KRT15	-1.60077	2.98094e-24	3.67686e-23
CRABP2	-1.15127	3.14265e-24	3.86996e-23
CPXM2	-0.827456	3.14342e-24	3.86996e-23
SERPINB5	-0.811156	4.24175e-24	5.1992e-23
LAMB1	-0.742718	4.72831e-24	5.79195e-23
DUSP5	-1.06828	7.46416e-24	9.10329e-23
CXCR4	-0.912378	7.48011e-24	9.11705e-23
IER3	-1.06666	7.51847e-24	9.15809e-23
CLEC14A	-0.587915	8.03561e-24	9.76974e-23
UBA7	-0.679719	1.12836e-23	1.36677e-22
KLRB1	-0.621645	1.18609e-23	1.43314e-22
CLDN5	-0.76733	1.22096e-23	1.47345e-22
CALCRL	-0.634985	1.46135e-23	1.75704e-22
PDLIM3	-0.819764	1.49935e-23	1.80051e-22
PARM1	-0.794165	1.5568e-23	1.86835e-22
IL7R	-0.803091	1.81321e-23	2.17341e-22
FRZB	-0.759429	2.00965e-23	2.40592e-22
CEBPB	-0.662145	2.02368e-23	2.42123e-22
HSPG2	-0.901083	2.46595e-23	2.94317e-22
FOSL2	-0.689059	3.17007e-23	3.75147e-22
LDHB	-0.940606	3.25482e-23	3.84711e-22
GPX2	-0.902152	3.74383e-23	4.4091e-22
GABRP	-0.998863	4.05697e-23	4.77213e-22
CYP3A5	-0.657543	4.09305e-23	4.81167e-22
CFTR	-0.720772	4.91269e-23	5.75444e-22
ETV5	-0.64076	5.35367e-23	6.25973e-22
HEYL	-0.694443	6.43785e-23	7.51839e-22
PPP1R14B	0.619755	7.43494e-23	8.66213e-22
RGCC	-0.75623	1.11464e-22	1.28863e-21
TAGLN2	-0.620894	1.78652e-22	2.04601e-21
KLF2	-0.794451	1.86952e-22	2.13856e-21
PRRG4	-0.604411	2.08694e-22	2.37614e-21
C1QA	-0.828488	2.18645e-22	2.48366e-21
NUDT10	-0.771511	2.348e-22	2.66252e-21
LRP1	-0.712021	2.61188e-22	2.95147e-21
HOXD9	-0.623306	2.79798e-22	3.15629e-21
CD3E	-0.735864	2.80149e-22	3.15842e-21
CCL5	-0.897473	3.72593e-22	4.15509e-21
RP11-467J12.4	-0.990046	3.9696e-22	4.42179e-21
UPK1A	-1.02663	4.5201e-22	5.01782e-21
SOCS3	-1.34403	5.86257e-22	6.486e-21
PHLDA3	-0.627227	6.16797e-22	6.81617e-21
NCOA7	-0.784124	6.83585e-22	7.54144e-21
CAMKK2	0.752914	7.07143e-22	7.79693e-21
TMEM158	-0.772778	7.43082e-22	8.18396e-21
CNN3	-0.654539	7.57981e-22	8.33865e-21
CD48	-0.630091	8.13815e-22	8.92273e-21
SELPLG	-0.631934	8.97064e-22	9.81895e-21
CD69	-0.665559	8.98294e-22	9.82142e-21
LAPTM5	-0.723254	9.46439e-22	1.03338e-20
ANTXR2	-0.687052	1.12438e-21	1.22113e-20
METTL7A	-0.648208	1.13295e-21	1.22907e-20
CD4	-0.668362	1.15643e-21	1.25385e-20
EMP1	-0.81489	1.41163e-21	1.52462e-20
ITGB2	-0.643398	1.73019e-21	1.85739e-20
FOXF2	-0.763667	2.0035e-21	2.14137e-20
C1QC	-0.758574	2.2376e-21	2.38897e-20
JCAD	-0.598424	2.32303e-21	2.47613e-20
VSIG2	-1.4852	2.45887e-21	2.61521e-20
IRS1	-0.677324	2.6383e-21	2.80452e-20
IGF2	-0.803407	2.9405e-21	3.10884e-20
HLA-DRB1	-0.803082	3.49667e-21	3.68689e-20
FOLR2	-0.631311	3.84105e-21	4.04563e-20
PLSCR1	-0.641441	4.32987e-21	4.54579e-20
RAC2	-0.709395	4.59847e-21	4.82518e-20
BIRC3	-0.671812	5.33872e-21	5.59292e-20
LAMB2	-0.58679	5.7846e-21	6.05678e-20
DKK1	-0.862542	6.7587e-21	7.0315e-20
BEX1	-0.883246	7.77715e-21	8.06529e-20
LSP1	-0.639444	7.84635e-21	8.13273e-20
IFITM1	-0.867571	8.15757e-21	8.44635e-20
OLFM4	-1.97103	9.34514e-21	9.65549e-20
ACKR3	-0.669047	9.76562e-21	1.00846e-19
LXN	-0.779737	1.15594e-20	1.19055e-19
AMOT	-0.610598	1.22664e-20	1.26071e-19
CXCL6	-0.599177	1.26601e-20	1.29844e-19
CLEC3B	-0.756707	1.53723e-20	1.5692e-19
APOLD1	-0.677814	1.55904e-20	1.5898e-19
VANGL2	-0.749381	1.62853e-20	1.65806e-19
IGFBP3	-0.789381	1.71577e-20	1.74326e-19
SELENOM	-0.79527	1.85443e-20	1.87827e-19
PYCARD	-0.656456	1.90002e-20	1.92345e-19
PTN	-1.20462	2.01278e-20	2.03654e-19
SLCO2A1	-0.589453	2.26529e-20	2.28494e-19
COL8A1	-0.768968	2.27957e-20	2.29815e-19
BST2	-0.970962	2.3511e-20	2.36905e-19
C1QB	-0.755633	2.55812e-20	2.57367e-19
LGALS3BP	-0.88755	3.27929e-20	3.27058e-19
GMFG	-0.621162	3.5861e-20	3.57111e-19
RAMP3	-0.619979	4.09407e-20	4.06866e-19
CPAMD8	-0.71194	4.5425e-20	4.50286e-19
PENK	-0.616987	4.75444e-20	4.70341e-19
SDC2	-0.705151	7.71426e-20	7.5323e-19
PLAC9	-0.766359	1.00028e-19	9.7135e-19
DEFB1	-1.14797	1.0381e-19	1.00707e-18
MGLL	-0.590956	1.12598e-19	1.08899e-18
GBP4	-0.658496	1.12645e-19	1.08899e-18
SAMD11	-0.656271	1.1887e-19	1.14691e-18
HLA-DQA1	-0.741629	1.21865e-19	1.17407e-18
DUSP6	-0.596273	1.47325e-19	1.41307e-18
TPSAB1	-0.796938	1.92668e-19	1.8309e-18
CFD	-1.01241	2.21411e-19	2.0959e-18
KRT7	-1.26653	2.37959e-19	2.24492e-18
SCGB3A1	-1.02272	2.54633e-19	2.39442e-18
TFCP2L1	-0.816269	2.54786e-19	2.39442e-18
AHNAK	-0.604695	2.63429e-19	2.47208e-18
CYBRD1	-0.721005	2.85799e-19	2.67175e-18
ASB5	-0.632279	3.24037e-19	3.02197e-18
RRAD	-0.808246	3.37102e-19	3.13932e-18
CST7	-0.632141	3.88633e-19	3.60034e-18
SCD5	-0.59295	4.3182e-19	3.99097e-18
PTPRC	-0.670158	6.07509e-19	5.56993e-18
CYBB	-0.670907	7.15235e-19	6.51785e-18
PI16	-1.09958	7.74099e-19	7.03458e-18
CEACAM1	-0.78923	9.62606e-19	8.675e-18
LDAH	-0.624742	9.82838e-19	8.85324e-18
KLF10	-0.765298	1.02106e-18	9.1891e-18
DSC3	-0.725139	1.06394e-18	9.54857e-18
CORO1A	-0.673648	1.06483e-18	9.55218e-18
THBS1	-0.984971	1.16911e-18	1.04588e-17
WIF1	-0.746014	1.24976e-18	1.11548e-17
CD37	-0.585263	1.27316e-18	1.13584e-17
CXCL17	-1.07996	1.29453e-18	1.15385e-17
FERMT1	-0.612156	1.40142e-18	1.24515e-17
SECTM1	-0.744271	1.79653e-18	1.58396e-17
PLVAP	-0.651504	1.85008e-18	1.62897e-17
RCN3	-0.596714	2.27308e-18	1.99692e-17
RAC3	0.590196	2.35482e-18	2.0678e-17
POSTN	-0.827953	2.50751e-18	2.19398e-17
FBXO2	-0.654494	2.55777e-18	2.23496e-17
MBOAT1	-0.587109	2.62468e-18	2.2924e-17
FOXQ1	-0.668239	2.87309e-18	2.50042e-17
RGS5	-0.72422	3.52678e-18	3.053e-17
CKM	-1.27533	3.98592e-18	3.43314e-17
CD2	-0.693183	4.79948e-18	4.11643e-17
SLC7A3	-0.585689	4.93014e-18	4.22293e-17
RPL39L	-0.664856	5.04269e-18	4.31367e-17
CSTA	-0.8326	5.14015e-18	4.39511e-17
CCN1	-1.02001	6.14799e-18	5.22258e-17
B3GNT3	-0.691182	6.98744e-18	5.92023e-17
RGS1	-0.801615	7.33761e-18	6.19811e-17
TYROBP	-0.644169	8.82917e-18	7.41316e-17
AMIGO2	-0.59249	1.35153e-17	1.12654e-16
MYOC	-0.66309	1.38326e-17	1.15152e-16
ITM2A	-0.81284	1.83758e-17	1.51873e-16
ARHGEF26	0.593466	2.40589e-17	1.97505e-16
ADAMTS1	-0.892452	3.35173e-17	2.73428e-16
FGFRL1	0.627598	3.8412e-17	3.11667e-16
HLA-F	-0.639321	5.45344e-17	4.37754e-16
F13A1	-0.58744	5.81931e-17	4.65783e-16
LTF	-2.19082	6.03188e-17	4.82402e-16
KRT17	-1.42988	7.04958e-17	5.60809e-16
HLA-DQB2	-0.704081	8.59287e-17	6.81638e-16
RHPN1	0.610671	9.1742e-17	7.26278e-16
PYGL	-0.618391	1.09349e-16	8.62521e-16
BTG2	-0.806322	1.12488e-16	8.86202e-16
ALDH2	-0.678672	1.17883e-16	9.26465e-16
CLDN1	-0.877232	1.33929e-16	1.04962e-15
KRT4	-0.700129	1.34702e-16	1.05526e-15
COL7A1	-0.67261	1.70703e-16	1.33035e-15
LSAMP	-0.756943	1.92391e-16	1.49223e-15
HLA-DRB5	-0.805756	2.41312e-16	1.8606e-15
EPHB6	-0.720807	2.44588e-16	1.88511e-15
SLC2A3	-0.656821	3.22849e-16	2.47366e-15
SERPINF2	-0.690149	6.90182e-16	5.1765e-15
CP	-0.881598	7.18658e-16	5.37768e-15
GPNMB	-0.675716	1.22378e-15	9.03298e-15
KRT14	-1.16119	1.68319e-15	1.22801e-14
CCL2	-1.04272	1.9744e-15	1.43405e-14
BGN	-0.72549	2.04572e-15	1.48364e-14
NBL1	-0.825071	2.13627e-15	1.54759e-14
KRT13	-1.23819	2.47847e-15	1.79084e-14
DUSP1	-0.808322	2.55437e-15	1.84364e-14
CFB	-0.786233	2.69207e-15	1.94159e-14
COL1A1	-0.831778	3.58532e-15	2.56218e-14
MYOM1	-0.60431	4.94188e-15	3.49076e-14
FNDC10	0.590841	5.28753e-15	3.72683e-14
CD3D	-0.643208	6.09844e-15	4.28294e-14
IL32	-0.603972	6.93424e-15	4.8577e-14
H2AW	0.633167	7.00512e-15	4.90559e-14
TIMP4	-0.591631	7.46085e-15	5.21539e-14
DEPP1	-0.682003	1.48363e-14	1.02068e-13
CD52	-0.71566	1.50058e-14	1.03161e-13
HSD17B13	-0.71025	1.52115e-14	1.04428e-13
ADRA2C	-0.5904	1.59766e-14	1.09603e-13
SOD2	-0.591186	1.92015e-14	1.31128e-13
EDN1	-0.658448	2.30316e-14	1.56519e-13
ALPL	-0.592729	2.31184e-14	1.57054e-13
JCHAIN	-1.27076	2.4919e-14	1.68758e-13
CASQ1	-0.626326	3.28074e-14	2.20651e-13
IL2RG	-0.603692	3.33358e-14	2.24128e-13
COL5A2	-0.597701	3.62975e-14	2.4312e-13
SDC1	-0.729574	3.95385e-14	2.64375e-13
OAT	-0.592022	4.66652e-14	3.10434e-13
TGM4	-1.82315	4.78231e-14	3.17641e-13
ITPR1	-0.64438	6.19948e-14	4.09069e-13
CXCL1	-0.918512	6.53103e-14	4.3022e-13
P3H2	-1.05466	8.75116e-14	5.71076e-13
S100A9	-0.870598	9.31504e-14	6.07265e-13
PER1	-0.621828	1.1265e-13	7.31216e-13
PTPRT	0.658795	1.16974e-13	7.59028e-13
CCL19	-0.960004	1.1849e-13	7.68612e-13
COCH	-0.68951	1.37604e-13	8.88472e-13
DUSP2	-0.700891	1.41411e-13	9.12146e-13
ID2	-0.596705	2.19582e-13	1.39882e-12
SELE	-0.88815	2.25554e-13	1.43486e-12
MT1A	-0.790305	2.41354e-13	1.53402e-12
UBD	-0.711503	2.69155e-13	1.70462e-12
MX1	-0.616162	3.00315e-13	1.89398e-12
HLA-DQB1	-0.676698	3.31624e-13	2.08605e-12
GALM	-0.595734	6.01424e-13	3.70565e-12
HLA-A	-0.631465	6.02065e-13	3.70843e-12
C11orf96	-0.794166	6.10863e-13	3.76144e-12
TMSB15A	0.758078	7.18574e-13	4.38871e-12
SOD3	-0.647376	7.30163e-13	4.45489e-12
OR2I1P	-0.699577	9.25213e-13	5.59307e-12
LCN2	-1.3214	1.17152e-12	7.0126e-12
SEMA3C	-0.659155	1.18909e-12	7.11562e-12
PTGS2	-0.815397	2.23121e-12	1.30754e-11
S100A2	-0.79815	3.12338e-12	1.81028e-11
CEBPD	-0.701904	5.98524e-12	3.39349e-11
CXCL2	-0.902125	6.42289e-12	3.63214e-11
FASN	0.637692	8.47988e-12	4.73913e-11
CCK	-0.834269	8.58418e-12	4.79331e-11
PRUNE2	-0.592394	9.08302e-12	5.05884e-11
SCGB2A1	-0.61189	9.71947e-12	5.40407e-11
HSPB1	-0.671392	1.09963e-11	6.09318e-11
DDIT4	-0.592394	1.10095e-11	6.09877e-11
MMP7	-1.10838	1.17884e-11	6.50628e-11
ANG	-0.610737	1.72215e-11	9.38297e-11
MT1X	-0.725175	1.99993e-11	1.0833e-10
MSMB	-1.31849	2.08519e-11	1.12823e-10
AQP3	-0.590992	2.17755e-11	1.17625e-10
LYZ	-0.845495	2.4513e-11	1.31974e-10
CHI3L2	-0.653184	2.74088e-11	1.46917e-10
EGR1	-1.04163	3.42296e-11	1.81981e-10
TPSB2	-0.673152	4.94055e-11	2.59694e-10
KCNK3	-0.67766	4.9801e-11	2.61703e-10
QPCT	-0.596218	5.18959e-11	2.72272e-10
SGK1	-0.765816	5.86829e-11	3.05746e-10
NUDT8	0.821621	6.40623e-11	3.32708e-10
SP8	-0.597454	6.94733e-11	3.59568e-10
KRT19	-0.808286	7.31518e-11	3.77906e-10
CLDN7	0.603927	7.37693e-11	3.80894e-10
SLC15A2	-0.656931	8.50287e-11	4.36034e-10
SCNN1G	-0.689128	8.59947e-11	4.40526e-10
THBS2	-0.628557	9.81814e-11	5.00984e-10
IL6	-0.617496	1.19362e-10	6.04327e-10
SCGB1A1	-1.12777	1.26422e-10	6.39409e-10
CPNE7	0.595216	1.53013e-10	7.66558e-10
HLA-DQA2	-0.771829	1.58701e-10	7.94235e-10
NNMT	-0.625953	2.03344e-10	1.01067e-09
FOS	-1.05347	2.70291e-10	1.32701e-09
MISP	-0.760049	2.71029e-10	1.32983e-09
CPM	-0.673854	2.71415e-10	1.33105e-09
EGR2	-0.686966	2.75686e-10	1.3503e-09
GSTA1	-0.86249	2.99792e-10	1.46141e-09
CDC42EP5	-0.853749	3.77406e-10	1.82338e-09
TNFRSF12A	-0.595942	4.36718e-10	2.10007e-09
SLC22A3	-0.833363	4.67486e-10	2.24031e-09
BHLHE40	-0.646185	6.20747e-10	2.94874e-09
GADD45B	-0.655376	7.03252e-10	3.32933e-09
ZFP36	-0.844736	7.1079e-10	3.36094e-09
CD177	-1.21752	7.73286e-10	3.64674e-09
NEFH	-1.37933	8.71845e-10	4.0908e-09
SERPINE1	-0.785523	8.84897e-10	4.14707e-09
ACTA1	-1.03048	1.39315e-09	6.40005e-09
HPSE2	-0.626445	1.49759e-09	6.86049e-09
AOC1	-0.887029	2.16213e-09	9.76054e-09
TGM2	-0.598728	2.17333e-09	9.8066e-09
ALDH1A1	-0.78871	2.277e-09	1.0246e-08
VSTM2L	0.78811	2.48266e-09	1.11278e-08
CACNG4	-0.736629	3.11628e-09	1.37782e-08
S100P	-0.906493	4.87766e-09	2.11777e-08
NR4A3	-0.62385	5.22756e-09	2.26065e-08
PI15	-0.866453	7.01559e-09	2.99936e-08
PEX10	0.641251	7.04845e-09	3.01209e-08
SSTR1	0.659302	1.29944e-08	5.38005e-08
SAA1	-0.926122	1.93933e-08	7.89058e-08
ACP5	-0.604421	2.13361e-08	8.63788e-08
DLX1	0.769957	4.4321e-08	1.73571e-07
CYP1B1	-0.719173	7.27635e-08	2.78319e-07
PLAAT4	-0.586713	8.14974e-08	3.10389e-07
EGR3	-0.628498	1.07155e-07	4.04246e-07
SCUBE2	-0.718705	2.20044e-07	8.02242e-07
IGLL5	-0.587126	2.20188e-07	8.02617e-07
MT1M	-0.748209	2.40352e-07	8.72539e-07
PHYHD1	-0.655092	2.78757e-07	1.00598e-06
PDZK1IP1	-0.718098	3.19417e-07	1.14552e-06
JUNB	-0.647174	3.96747e-07	1.4053e-06
MT1E	-0.831072	4.04998e-07	1.43193e-06
AMACR	0.724523	6.04619e-07	2.09303e-06
TNNC1	-0.721055	6.58601e-07	2.26643e-06
TMEM45B	0.626159	6.66105e-07	2.29006e-06
PI3	-0.661459	8.01486e-07	2.7248e-06
ATF3	-0.729175	1.91883e-06	6.2279e-06
CD38	-0.680083	2.8161e-06	8.94214e-06
MME	-0.626932	4.0126e-06	1.25457e-05
PSCA	-1.07041	4.6654e-06	1.44618e-05
FOLH1	0.592712	5.04649e-06	1.55813e-05
PIGR	-0.896973	5.16154e-06	1.59219e-05
ANPEP	-1.07846	5.29088e-06	1.63023e-05
VGLL3	-0.690648	6.12075e-06	1.87177e-05
AZGP1	-0.717166	7.8168e-06	2.35504e-05
COL9A2	0.698164	1.04855e-05	3.10591e-05
HSD17B6	-0.670413	1.10222e-05	3.25254e-05
FOSB	-0.852333	1.81158e-05	5.19363e-05
SERPINB11	-0.637696	1.96788e-05	5.61536e-05
ORM2	-0.805281	3.4931e-05	9.62871e-05
NKAIN1	0.635436	3.5893e-05	9.87993e-05
MT1G	-0.75442	4.45999e-05	0.000121432
SPON2	0.718646	6.1103e-05	0.000163136
CHGA	-0.610985	7.9692e-05	0.000209531
ACSM1	0.614132	0.000279915	0.000675599
OR51E2	0.711608	0.000282719	0.000682031
ALOX15B	-0.814164	0.000699267	0.00158312
PGC	-0.615039	0.00194974	0.00408998
CST1	-0.608384	0.00228386	0.00473394
NPY	0.881047	0.0047245	0.00924182
ORM1	-0.640496	0.0147008	0.0262857

## Sheet: cc_de_OS
gene	log2FC	pvalue	adjusted_pvalue
MSRB3	-1.46686	1.16471e-90	7.58538e-87
SCARA3	-1.34562	1.19602e-89	5.84198e-86
AXL	-1.11431	1.01569e-82	6.20143e-80
RBPMS	-1.19335	4.47196e-81	2.29929e-78
SLC8A1	-0.780525	8.58539e-76	2.20712e-73
PRNP	-0.778056	1.8427e-73	3.91333e-71
MMP14	-1.16649	1.68068e-67	2.34551e-65
GNAO1	-0.644001	3.30701e-66	4.1956e-64
TPM1	-1.08669	3.26525e-65	3.75274e-63
MMP2	-1.3115	3.55532e-62	3.14316e-60
GSTP1	-1.52301	7.10791e-58	4.61376e-56
MET	-0.965827	4.6297e-53	2.27274e-51
CYGB	-0.862664	4.68774e-53	2.29547e-51
PDGFD	-0.833992	5.37994e-52	2.51467e-50
ACOX2	-0.836409	7.98179e-52	3.72192e-50
CRYAB	-1.42048	8.66409e-52	4.02088e-50
PDLIM1	-1.02654	5.1999e-49	2.09044e-47
FBLN5	-1.03472	2.02254e-47	7.44187e-46
PDGFRB	-0.996605	1.71792e-46	5.94066e-45
GPX3	-1.34258	3.22315e-46	1.0952e-44
FOXO1	-0.601297	1.74413e-45	5.75621e-44
SIRPA	-0.681186	6.49428e-45	2.11123e-43
AQP1	-0.993696	1.02084e-43	3.1659e-42
PDGFRA	-0.776308	1.02576e-42	3.03657e-41
EPAS1	-0.886962	1.27821e-41	3.59335e-40
GPX8	-0.736981	6.66919e-40	1.73737e-38
GSTM2	-0.72577	5.05864e-38	1.19367e-36
BCL2	-0.730321	7.85495e-33	1.48855e-31
PTGS1	-0.84553	1.90119e-32	3.52758e-31
CYBA	-0.854012	3.46309e-32	6.32353e-31
PAGE4	-1.33905	4.25446e-32	7.73244e-31
RHOB	-0.931019	6.163e-32	1.10979e-30
DUOX1	-0.709171	2.40946e-30	4.0513e-29
TLR4	-0.650777	7.21361e-30	1.19137e-28
ETS1	-0.739435	1.80786e-28	2.76384e-27
ANXA1	-0.946466	2.18223e-28	3.33097e-27
ALOX5AP	-0.628245	3.2666e-26	4.49141e-25
GPX7	-0.703352	1.16638e-24	1.47214e-23
AIF1	-0.719439	2.42845e-24	3.01251e-23
TNFAIP3	-0.797911	2.52006e-24	3.12219e-23
GPX2	-0.902152	3.74383e-23	4.4091e-22
ETV5	-0.64076	5.35367e-23	6.25973e-22
KLF2	-0.794451	1.86952e-22	2.13856e-21
NCOA7	-0.784124	6.83585e-22	7.54144e-21
CAMKK2	0.752914	7.07143e-22	7.79693e-21
PENK	-0.616987	4.75444e-20	4.70341e-19
CYBB	-0.670907	7.15235e-19	6.51785e-18
DUSP1	-0.808322	2.55437e-15	1.84364e-14
COL1A1	-0.831778	3.58532e-15	2.56218e-14
SOD2	-0.591186	1.92015e-14	1.31128e-13
EDN1	-0.658448	2.30316e-14	1.56519e-13
SDC1	-0.729574	3.95385e-14	2.64375e-13
S100A9	-0.870598	9.31504e-14	6.07265e-13
CCL19	-0.960004	1.1849e-13	7.68612e-13
SOD3	-0.647376	7.30163e-13	4.45489e-12
PTGS2	-0.815397	2.23121e-12	1.30754e-11
HSPB1	-0.671392	1.09963e-11	6.09318e-11
IL6	-0.617496	1.19362e-10	6.04327e-10
SCGB1A1	-1.12777	1.26422e-10	6.39409e-10
FOS	-1.05347	2.70291e-10	1.32701e-09
GSTA1	-0.86249	2.99792e-10	1.46141e-09
NR4A3	-0.62385	5.22756e-09	2.26065e-08
CYP1B1	-0.719173	7.27635e-08	2.78319e-07
CD38	-0.680083	2.8161e-06	8.94214e-06

## Sheet: cc_de_metabolism
gene	log2FC	pvalue	adjusted_pvalue
AOC3	-1.48046	3.51759e-89	9.81811e-86
CHST3	-1.00248	7.41785e-86	7.62789e-83
OGN	-1.60155	5.55556e-78	1.83655e-75
PTGIS	-1.34583	1.34918e-75	3.33675e-73
PRELP	-1.3773	1.23537e-64	1.34841e-62
CES1	-1.46676	2.28889e-62	2.06085e-60
CSPG4	-0.960414	1.97182e-58	1.35177e-56
GSTP1	-1.52301	7.10791e-58	4.61376e-56
GSTM5	-0.825048	4.38993e-55	2.43666e-53
PYGM	-1.16749	1.00439e-53	5.15057e-52
GSTM4	-0.705722	3.09077e-53	1.52494e-51
PPP1R3C	-1.04293	3.77864e-50	1.61547e-48
B3GALT2	-0.637229	2.57549e-48	1.0004e-46
CHST11	-0.636404	3.46432e-48	1.32978e-46
SDC3	-0.673306	5.37801e-48	2.0403e-46
DCN	-1.28171	9.1457e-47	3.22543e-45
AKR1B1	-0.886076	9.94511e-46	3.31018e-44
CHST15	-0.787065	2.66357e-44	8.46192e-43
PFKFB3	-0.811478	3.94751e-42	1.14261e-40
CYP27A1	-1.5284	9.71608e-42	2.75519e-40
ACSF2	-0.826714	9.43873e-41	2.55775e-39
CYP4B1	-1.19945	2.94763e-40	7.81421e-39
GSTM2	-0.72577	5.05864e-38	1.19367e-36
CHST2	-0.84171	5.50994e-38	1.29859e-36
UST	-0.635107	6.0862e-36	1.3331e-34
LUM	-1.23394	1.39748e-33	2.74411e-32
PTGS1	-0.84553	1.90119e-32	3.52758e-31
GGT6	-0.942148	2.16556e-32	4.0029e-31
GGT5	-0.710236	4.67424e-32	8.45605e-31
GSTM3	-0.804846	8.28663e-31	1.42271e-29
PDK4	-1.29497	8.59587e-31	1.47451e-29
OMD	-0.739172	1.90437e-30	3.21865e-29
FMO2	-0.605199	8.58296e-29	1.33302e-27
AHR	-0.77073	9.35276e-29	1.44912e-27
MAOB	-1.23613	2.09852e-26	2.92237e-25
GPC3	-0.644266	7.0421e-26	9.43679e-25
HSPG2	-0.901083	2.46595e-23	2.94317e-22
LDHB	-0.940606	3.25482e-23	3.84711e-22
CYP3A5	-0.657543	4.09305e-23	4.81167e-22
SDC2	-0.705151	7.71426e-20	7.5323e-19
B3GNT3	-0.691182	6.98744e-18	5.92023e-17
PYGL	-0.618391	1.09349e-16	8.62521e-16
ALDH2	-0.678672	1.17883e-16	9.26465e-16
BGN	-0.72549	2.04572e-15	1.48364e-14
SDC1	-0.729574	3.95385e-14	2.64375e-13
NNMT	-0.625953	2.03344e-10	1.01067e-09
GSTA1	-0.86249	2.99792e-10	1.46141e-09
HPSE2	-0.626445	1.49759e-09	6.86049e-09
AOC1	-0.887029	2.16213e-09	9.76054e-09
ALDH1A1	-0.78871	2.277e-09	1.0246e-08
CYP1B1	-0.719173	7.27635e-08	2.78319e-07
ACSM1	0.614132	0.000279915	0.000675599

## Sheet: KEGG_enrich
ID	Description	GeneRatio	BgRatio	pvalue	p.adjust	qvalue	geneID	Count
hsa04510	Focal adhesion	54/608	201/8218	1.32481e-17	3.90819e-15	2.73329e-15	858/857/2316/4638/4660/56034/2318/3679/7414/1291/3680/3910/3672/87/1293/1288/10398/3678/1292/1284/894/4233/80310/3371/5579/5159/3691/7094/7791/5156/3908/3611/8516/1282/3914/3694/596/1278/3675/3696/3791/5578/5295/2335/3673/3912/5880/330/3913/7057/5881/1277/7058/1298	54
hsa04514	Cell adhesion molecules	45/608	157/8218	5.31152e-16	7.83449e-14	5.47925e-14	58494/64115/5010/3680/1272/958/54413/23114/8506/9672/83700/4684/6403/3111/8516/947/3133/3115/3113/5175/3696/84189/1001/4359/7412/79679/3122/7122/6404/920/3689/3123/6383/3117/5788/914/3134/9076/3127/6382/6401/3119/3105/1366/3118	45
hsa04512	ECM-receptor interaction	30/608	88/8218	2.95506e-13	2.90581e-11	2.03225e-11	3679/1291/3680/3910/3672/1293/1288/3678/1292/1284/3371/3691/3908/8516/1282/3914/3694/1278/3675/3696/2335/3673/3912/3339/3913/7057/1277/6382/7058/1298	30
hsa05150	Staphylococcus aureus infection	30/608	96/8218	3.86927e-12	2.85359e-10	1.99573e-10	3075/716/715/5648/3426/6403/3111/25984/718/3115/3113/3122/3866/712/6404/3689/714/3123/713/1672/3117/1675/3872/3127/3861/3860/629/3119/3880/3118	30
hsa05144	Malaria	21/608	50/8218	1.11761e-11	6.59389e-10	4.61161e-10	958/2995/4233/6403/7040/7043/7042/7099/5175/7412/2532/3820/4035/3689/6383/7057/6347/6382/6401/7058/3569	21
hsa05146	Amoebiasis	30/608	102/8218	2.17931e-11	1.07149e-09	7.49377e-10	2774/7414/3910/87/1288/338382/1284/5579/5272/3908/7040/1282/3914/7043/7042/1278/7099/5578/1281/5295/2335/929/3912/3689/3913/1277/2919/2920/3315/3569	30
hsa04974	Protein digestion and absorption	29/608	103/8218	1.52783e-10	6.43871e-09	4.50308e-09	6546/1291/1293/1288/477/1292/1284/1307/482/1296/7373/91522/1289/1308/80781/1282/2006/1306/85301/1278/481/1281/1359/1295/1294/1277/1290/4311/1298	29
hsa04640	Hematopoietic cell lineage	28/608	99/8218	2.83434e-10	1.04516e-08	7.30962e-09	3672/1435/3678/1436/3111/3815/947/3675/3115/3113/929/3122/3673/3575/916/920/3123/3117/951/914/3127/915/3119/3569/3118/952/4311/290	28
hsa04151	PI3K-Akt signaling pathway	60/608	354/8218	6.21773e-10	1.82544e-08	1.27667e-08	2247/56034/1902/284/3679/2260/1291/3680/3910/3672/1435/1293/1288/3678/1292/54331/1284/894/4233/80310/1946/3371/2791/5159/3691/5156/2263/1436/3908/4804/2252/8516/1282/3815/1969/3914/3694/596/1278/3675/7099/3696/3791/5578/5295/2335/3673/3912/3575/3667/3481/3913/7057/1277/3561/54541/6446/7058/3569/1298	60
hsa05416	Viral myocarditis	21/608	60/8218	6.53741e-10	1.82544e-08	1.27667e-08	857/958/6443/6442/1756/3908/3111/3133/3115/3113/3122/3689/3123/5880/3117/5881/3134/3127/3119/3105/3118	21
hsa05414	Dilated cardiomyopathy	27/608	96/8218	6.80674e-10	1.82544e-08	1.27667e-08	111/6546/3679/7168/3680/5350/3672/3678/109/6443/6442/1674/7169/3691/1756/3908/8516/7040/70/3694/7043/7042/3675/3696/3673/27092/7134	27
hsa05410	Hypertrophic cardiomyopathy	26/608	90/8218	7.45113e-10	1.83174e-08	1.28107e-08	6546/3679/7168/3680/3672/3678/6443/6442/1674/7169/3691/1756/3908/8516/7040/70/3694/7043/7042/3675/3696/3673/1906/3569/27092/7134	26
hsa05323	Rheumatoid arthritis	26/608	93/8218	1.6319e-09	3.70317e-08	2.5899e-08	284/1435/1513/3111/7040/7043/7042/3115/7099/3113/6387/3122/6352/3689/3123/6372/3117/3127/6347/2919/3119/2920/3569/3118/2353/54	26
hsa04933	AGE-RAGE signaling pathway in diabetic complications	27/608	100/8218	1.84692e-09	3.89171e-08	2.72177e-08	4313/1288/7048/113026/1284/5579/2308/7040/1282/7043/7042/596/1278/5578/1281/5295/2335/7056/7412/1536/6347/1277/1906/6401/1958/3569/5054	27
hsa05205	Proteoglycans in cancer	40/608	205/8218	9.32287e-09	1.8335e-07	1.2823e-07	858/2247/857/8324/2316/4660/2318/2260/4478/4313/117581/3678/22808/4233/5579/1634/3236/7078/7040/4060/7042/1278/7099/3791/5328/5578/3059/5295/2335/6237/2719/3673/3339/3481/6383/7057/1277/6382/3708/60495	40
hsa04610	Complement and coagulation cascades	23/608	86/8218	3.61435e-08	6.66396e-07	4.66061e-07	710/3075/716/1191/715/5648/730/3426/2159/2/718/5328/7056/10544/712/3689/714/713/1675/2162/5345/629/5054	23
hsa05418	Fluid shear stress and atherosclerosis	30/608	139/8218	6.70702e-08	1.16387e-06	8.13979e-07	858/857/4313/2950/2949/2948/9181/652/4208/2946/596/1535/2947/5175/3791/59341/5295/7056/7412/10365/5880/6383/5881/6347/1843/1906/6382/6401/2353/2938	30
hsa05140	Leishmaniasis	20/608	77/8218	4.74099e-07	7.76996e-06	5.43412e-06	5579/3111/7040/7043/7042/1535/718/3115/7099/3113/3122/3689/3123/3117/1536/3127/3119/5743/3118/2353	20
hsa04145	Phagosome	30/608	152/8218	5.32173e-07	8.26269e-06	5.77873e-06	9902/84617/715/3678/338382/3111/7846/3133/1535/718/3115/7099/3113/7277/1520/929/3122/3673/3689/3123/3117/1536/11151/7057/3134/3127/3119/3105/7058/3118	30
hsa04810	Regulation of actin cytoskeleton	39/608	229/8218	6.27302e-07	9.25271e-06	6.47112e-06	2247/4638/4660/4629/56034/1902/3679/2934/7414/2260/3680/1073/4478/3672/87/10398/3678/22808/80310/730/5159/3691/5156/2263/2252/8516/3694/3675/3696/5295/6387/2335/6237/3673/7852/28984/3689/5880/5881	39
hsa04672	Intestinal immune network for IgA production	15/608	49/8218	1.35424e-06	1.90238e-05	1.33048e-05	958/3111/7040/3115/3113/6387/3122/7852/3123/3117/3127/3119/3569/3118/5284	15
hsa05330	Allograft rejection	13/608	38/8218	1.68342e-06	2.25732e-05	1.57871e-05	958/3111/3133/3115/3113/3122/3123/3117/3134/3127/3119/3105/3118	13
hsa04010	MAPK signaling pathway	45/608	294/8218	1.89887e-06	2.43551e-05	1.70333e-05	2247/2316/56034/2318/284/2260/1435/22808/7048/51776/4233/80310/1946/5579/10235/5159/4208/5156/2263/1436/4804/2252/7040/3815/1969/7043/7042/5321/3791/8912/5578/1647/6237/929/1847/3481/5880/1848/5881/1843/1844/3315/2353/4616/27092	45
hsa05412	Arrhythmogenic right ventricular cardiomyopathy	19/608	77/8218	2.13472e-06	2.62393e-05	1.83511e-05	83439/2697/6546/3679/3680/3672/3678/6443/6442/1674/3691/1756/3908/8516/3694/3675/3696/3673/27092	19
hsa05166	Human T-cell leukemia virus 1 infection	36/608	222/8218	5.50644e-06	6.4976e-05	4.54426e-05	111/958/109/7048/894/4776/7094/2114/3111/7040/3133/7043/7042/3115/3113/2113/5295/3122/916/920/3689/3123/3117/3134/3127/915/3561/3119/3105/4316/1958/3569/3118/2353/1959/7538	36
hsa05332	Graft-versus-host disease	13/608	42/8218	6.01678e-06	6.82673e-05	4.77445e-05	3111/3133/3115/3113/3122/3123/3117/3134/3127/3119/3105/3569/3118	13
hsa05310	Asthma	11/608	31/8218	7.15679e-06	7.81945e-05	5.46873e-05	958/2205/3111/3115/3113/3122/3123/3117/3127/3119/3118	11
hsa04670	Leukocyte transendothelial migration	23/608	114/8218	7.70739e-06	8.12028e-05	5.67913e-05	58494/7414/5010/4478/4313/87/10398/5579/83700/83593/1535/5175/5578/5295/6387/7412/7852/7122/3689/5880/1536/9076/1366	23
hsa04659	Th17 cell differentiation	22/608	108/8218	1.0313e-05	0.000102273	7.15271e-05	7048/3111/7040/2625/9466/861/3115/3113/3572/196/3122/916/920/3123/3117/3127/915/3561/3119/3569/3118/2353	22
hsa04015	Rap1 signaling pathway	34/608	210/8218	1.04006e-05	0.000102273	7.15271e-05	2247/111/56034/1902/284/2775/2260/1435/109/22808/4233/80310/1946/5579/10235/5159/7094/5156/2263/1436/4804/2252/83593/3815/1969/3791/3397/5578/5295/6237/3689/5880/7057/5881	34
hsa04270	Vascular smooth muscle contraction	25/608	134/8218	1.33272e-05	0.000126823	8.86971e-05	1909/10335/111/4638/4660/3779/4629/59/4882/3778/800/5592/10398/109/72/5579/94274/146/5321/1908/5578/10203/10268/1906/3708	25
hsa05321	Inflammatory bowel disease	16/608	65/8218	1.40304e-05	0.000129343	9.04594e-05	3111/7040/2625/7043/7042/3115/7099/3113/3122/3123/3117/3127/3561/3119/3569/3118	16
hsa05145	Toxoplasmosis	22/608	112/8218	1.89159e-05	0.000169097	0.000118262	2775/3910/958/3908/3111/7040/3914/7043/7042/596/3115/7099/3113/3122/3912/3123/330/3913/3117/3127/3119/3118	22
hsa05133	Pertussis	17/608	76/8218	2.94245e-05	0.000255301	0.000178551	710/1073/716/715/3678/834/718/7099/929/712/3689/714/6372/29108/713/3569/2353	17
hsa04940	Type I diabetes mellitus	12/608	43/8218	4.3891e-05	0.000369938	0.000258726	3111/3133/3115/3113/3122/3123/3117/3134/3127/3119/3105/3118	12
hsa04668	TNF signaling pathway	21/608	114/8218	7.85412e-05	0.000643601	0.000450119	4323/6376/1435/7133/5295/7412/7128/1051/6352/9021/330/6372/6347/1906/2919/6401/5743/2920/3569/2353/3726	21
hsa05320	Autoimmune thyroid disease	13/608	53/8218	9.29427e-05	0.00074103	0.000518258	958/3111/3133/3115/3113/3122/3123/3117/3134/3127/3119/3105/3118	13
hsa05222	Small cell lung cancer	18/608	92/8218	0.000113052	0.000877643	0.000613802	3910/1288/5915/1284/3908/1282/3914/596/3675/1647/5295/2335/3673/3912/330/3913/5743/4616	18
hsa04014	Ras signaling pathway	34/608	236/8218	0.000120972	0.000915041	0.000639957	2247/56034/284/2260/1435/23179/22808/54331/4233/80310/1946/5579/10235/2791/5159/22821/2114/5156/2263/1436/4804/2252/83593/3815/1969/5321/3791/2113/5578/5295/6237/3481/5880/5881	34
hsa05142	Chagas disease	19/608	102/8218	0.000146141	0.00107779	0.000753778	2774/2775/7048/7040/7043/7042/718/7099/5295/712/916/6352/714/713/6347/915/3569/2353/5054	19
hsa04612	Antigen processing and presentation	16/608	78/8218	0.000150786	0.00108492	0.000758769	1508/3111/3133/3115/3113/972/1520/3122/920/3123/3117/3134/3127/3119/3105/3118	16
hsa00480	Glutathione metabolism	13/608	57/8218	0.000205456	0.00144309	0.00100926	2950/2949/2948/2878/493869/2946/124975/2687/2947/2882/2877/2938/290	13
hsa04022	cGMP-PKG signaling pathway	26/608	167/8218	0.00021786	0.00149462	0.0010453	1909/493/10335/111/4638/3764/3779/6546/4882/8654/5350/3778/5592/10398/477/109/482/4776/5138/4208/146/1910/481/3667/152/3708	26
hsa04960	Aldosterone-regulated sodium reabsorption	10/608	37/8218	0.000254484	0.0017062	0.00119328	477/482/5579/6337/5578/481/5295/3667/6446/6340	10
hsa04061	Viral protein interaction with cytokine and cytokine receptor	18/608	100/8218	0.000337979	0.00221564	0.00154956	6376/1435/146433/1436/7133/3572/6387/6366/7852/6352/57007/6372/6347/3561/2919/6363/2920/3569	18
hsa04978	Mineral absorption	13/608	60/8218	0.000352944	0.0022229	0.00155464	493/9843/6546/477/482/30061/481/79901/4489/4501/4499/4493/4495	13
hsa04658	Th1 and Th2 cell differentiation	17/608	92/8218	0.000356234	0.0022229	0.00155464	84441/3111/2625/3115/3113/3122/28514/916/920/3123/3117/3127/915/3561/3119/3118/2353	17
hsa05165	Human papillomavirus infection	42/608	331/8218	0.000361691	0.0022229	0.00155464	83439/8324/3679/1291/3680/3910/3672/1293/1288/3678/1292/1284/894/3371/5159/3691/2308/84441/3908/7098/8516/1282/3914/3694/3133/1278/3675/3696/5295/2335/3673/3912/26508/3913/7057/3134/1277/4599/3105/5743/7058/1298	42
hsa05202	Transcriptional misregulation in cancer	28/608	193/8218	0.000421459	0.00253736	0.00177457	4211/4286/6935/958/7048/894/4233/2138/7102/2308/4208/1436/4804/4005/5087/861/5328/1647/929/1051/2119/330/3486/1848/3398/3569/4616/8013	28
hsa04218	Cellular senescence	24/608	156/8218	0.000450927	0.00266047	0.00186067	22808/7048/894/4776/2308/7040/677/83593/3133/7043/678/7042/59341/2113/1647/5295/6237/3486/3134/3708/3105/3569/4616/5054	24
hsa01521	EGFR tyrosine kinase inhibitor resistance	15/608	79/8218	0.000578874	0.00334839	0.00234178	2247/558/56034/2621/4233/80310/5579/5159/5156/2263/596/3791/5578/5295/3569	15
hsa04926	Relaxin signaling pathway	20/608	129/8218	0.00119195	0.00676205	0.00472921	111/59/2775/4313/1288/109/7048/54331/1284/2791/7040/1282/1278/1910/5578/1281/5295/1277/1906/2353	20
hsa04350	TGF-beta signaling pathway	16/608	95/8218	0.00149208	0.00825516	0.00577346	7048/10468/4052/1634/652/2200/3399/3400/7040/7043/7042/79875/3397/7057/4681/3398	16
hsa04064	NF-kappa B signaling pathway	17/608	104/8218	0.00151111	0.00825516	0.00577346	958/5579/596/7099/5328/1647/6387/7412/929/6366/7128/330/2919/6363/5743/2920/4616	17
hsa05164	Influenza A	24/608	171/8218	0.00169303	0.00908078	0.00635088	90865/5579/834/7098/3111/3115/7099/3113/5578/5295/3122/6352/9021/3123/29108/3117/7177/3127/6347/4599/3119/64499/3569/3118	24
hsa04540	Gap junction	15/608	88/8218	0.00183336	0.00960902	0.00672032	2697/111/56034/1902/5592/84617/109/80310/5579/5159/5156/7846/5578/7277/3708	15
hsa04360	Axon guidance	25/608	182/8218	0.00185747	0.00960902	0.00672032	7223/1947/1073/1808/91653/10398/2042/4776/4233/1946/9423/6091/3611/219699/1969/59277/5578/5295/6387/6237/7852/5880/5881/2051/10512	25
hsa04060	Cytokine-cytokine receptor interaction	36/608	295/8218	0.00188923	0.00960902	0.00672032	1489/90865/958/6376/1435/3953/7048/652/146433/1436/4804/94/7040/7133/9466/7043/7042/3572/6387/6366/1271/7852/3575/6352/920/57007/6372/284340/6347/9235/3561/2919/6363/2920/3569/51330	36
hsa04621	NOD-like receptor signaling pathway	25/608	186/8218	0.00251246	0.0125623	0.00878577	2634/3428/340061/1508/22861/834/84168/7205/2633/596/1535/7099/63940/7128/6352/118429/330/29108/115361/1536/6347/3708/2919/2920/3569	25
hsa04970	Salivary secretion	15/608	92/8218	0.00287639	0.0141422	0.00989073	493/111/3778/5592/477/109/482/5579/146/5578/481/3708/4069/952/1469	15
hsa04020	Calcium signaling pathway	30/608	240/8218	0.00306254	0.0147729	0.0103318	1909/493/2247/4638/6546/2774/56034/2260/5350/109/113026/4233/80310/5579/5159/5156/2263/5023/2252/146/3791/1910/845/8912/5578/7852/844/3708/7134/952	30
hsa04918	Thyroid hormone synthesis	13/608	75/8218	0.00310481	0.0147729	0.0103318	111/477/109/482/5579/2878/493869/53905/5578/481/2882/2877/3708	13
hsa05152	Tuberculosis	24/608	180/8218	0.00337486	0.0158029	0.0110522	9902/3111/7040/7043/7042/596/718/3115/7099/3113/972/1520/929/3122/1051/3689/3123/4046/3117/11151/3127/3119/3569/3118	24
hsa05215	Prostate cancer	15/608	97/8218	0.00482328	0.0222323	0.0155487	83439/56034/2260/6935/6716/2950/80310/5159/2308/5156/2263/596/5328/5295/2119	15
hsa04380	Osteoclast differentiation	18/608	128/8218	0.00600062	0.0272336	0.0190465	2274/4286/1435/7048/140885/1513/1436/7040/7042/1535/5295/2355/9021/7305/2353/54/3726/2354	18
hsa05218	Melanoma	12/608	72/8218	0.00611398	0.0273276	0.0191123	2247/56034/4286/2260/4233/80310/5159/5156/2252/1647/5295/4616	12
hsa05170	Human immunodeficiency virus 1 infection	26/608	212/8218	0.00720309	0.0317151	0.0221808	27350/2775/1073/340061/54331/4776/5579/2791/60489/7133/3133/596/7099/5578/5295/7852/916/920/5880/684/5881/3134/915/3708/3105/2353	26
hsa04068	FoxO signaling pathway	18/608	131/8218	0.00763052	0.033103	0.0231514	7048/894/6517/2308/7040/114907/1901/7043/7042/1647/5295/3575/10365/3667/6648/6446/3569/4616	18
hsa05322	Systemic lupus erythematosus	18/608	136/8218	0.0111265	0.0475698	0.0332691	716/958/87/715/730/3111/718/3115/3113/3122/712/714/3123/713/3117/3127/3119/3118	18
hsa04390	Hippo signaling pathway	20/608	157/8218	0.0115952	0.0488653	0.0341752	83439/8324/122786/7048/894/25937/6591/652/84962/7040/7003/1490/7043/7042/3397/3689/330/154796/3398/5054	20

## Sheet: GOBP_enrich
ID	Description	GeneRatio	BgRatio	pvalue	p.adjust	qvalue	geneID	Count
GO:0030198	extracellular matrix organization	94/1151	318/18903	1.22879e-39	4.41985e-36	2.83943e-36	CAV2/CAV1/PDPN/EFEMP2/EMILIN1/MYH11/FOXF1/DDR2/MMP14/EGFLAM/SH3PXD2B/FOXC1/FBLN1/MMP2/MATN2/NID1/ADAMTS8/GAS6/COL4A6/SULF2/OLFML2A/PAPLN/GPM6B/COL4A2/COL16A1/PHLDB1/ECM2/COL8A2/CCDC80/COL14A1/FBLN5/SMOC1/CRISPLD2/MFAP4/AEBP1/PDGFRA/TGFBI/CTSK/ANTXR1/COL23A1/LAMA2/COL5A1/NDNF/COL17A1/ITGA8/COL18A1/TGFB1/ANXA2/TNFRSF1B/COL4A1/LOXL1/ELN/CCN2/LOXL2/LAMB3/ABI3BP/COL15A1/NTN4/LTBP3/LUM/DPT/SULF1/COL27A…	94
GO:0043062	extracellular structure organization	94/1151	319/18903	1.64429e-39	4.41985e-36	2.83943e-36	CAV2/CAV1/PDPN/EFEMP2/EMILIN1/MYH11/FOXF1/DDR2/MMP14/EGFLAM/SH3PXD2B/FOXC1/FBLN1/MMP2/MATN2/NID1/ADAMTS8/GAS6/COL4A6/SULF2/OLFML2A/PAPLN/GPM6B/COL4A2/COL16A1/PHLDB1/ECM2/COL8A2/CCDC80/COL14A1/FBLN5/SMOC1/CRISPLD2/MFAP4/AEBP1/PDGFRA/TGFBI/CTSK/ANTXR1/COL23A1/LAMA2/COL5A1/NDNF/COL17A1/ITGA8/COL18A1/TGFB1/ANXA2/TNFRSF1B/COL4A1/LOXL1/ELN/CCN2/LOXL2/LAMB3/ABI3BP/COL15A1/NTN4/LTBP3/LUM/DPT/SULF1/COL27A…	94
GO:0045229	external encapsulating structure organization	94/1151	321/18903	2.93281e-39	5.25559e-36	3.37633e-36	CAV2/CAV1/PDPN/EFEMP2/EMILIN1/MYH11/FOXF1/DDR2/MMP14/EGFLAM/SH3PXD2B/FOXC1/FBLN1/MMP2/MATN2/NID1/ADAMTS8/GAS6/COL4A6/SULF2/OLFML2A/PAPLN/GPM6B/COL4A2/COL16A1/PHLDB1/ECM2/COL8A2/CCDC80/COL14A1/FBLN5/SMOC1/CRISPLD2/MFAP4/AEBP1/PDGFRA/TGFBI/CTSK/ANTXR1/COL23A1/LAMA2/COL5A1/NDNF/COL17A1/ITGA8/COL18A1/TGFB1/ANXA2/TNFRSF1B/COL4A1/LOXL1/ELN/CCN2/LOXL2/LAMB3/ABI3BP/COL15A1/NTN4/LTBP3/LUM/DPT/SULF1/COL27A…	94
GO:0031589	cell-substrate adhesion	89/1151	369/18903	3.86165e-30	5.19006e-27	3.33423e-27	AXL/FZD7/FLNA/PDPN/EFEMP2/FERMT2/EMILIN1/SORBS1/FOXF1/ANGPT1/ITGA7/MMP14/EGFLAM/VCL/PLEKHA2/ITGA9/FBLN1/ITGA1/CX3CL1/ACTN1/CORO1C/NID1/CSF1/GAS6/LIMS2/ITGA5/EPHA3/SFRP1/GPM6B/COL16A1/ATP1B2/EFNA5/FAM107A/ECM2/CCDC80/FBLN5/SGCE/ITGB4/TLN1/EDIL3/ZYX/MYADM/JAM3/ANTXR1/AJUBA/ACVRL1/NDNF/ILK/TRIP6/COL17A1/ITGA8/GBP1/CD34/CCN2/LAMB3/ABI3BP/ITGB6/NTN4/KANK1/BCL2/ITGA3/FBLN2/ITGB8/KDR/PLAU/ID1/COL3A1/PIK…	89
GO:0045785	positive regulation of cell adhesion	98/1151	484/18903	1.14308e-26	1.22904e-23	7.8957e-24	CAV1/FLNA/PDPN/EFEMP2/FERMT2/EMILIN1/FOXF1/ANGPT1/EGFLAM/EFNB1/VSIR/TPM1/PLEKHA2/CX3CL1/NID1/CSF1/LIMS2/PLPP3/ITGA5/SFRP1/TGFBR2/COL16A1/SMARCD3/ECM2/GLI3/CCDC80/ADAM19/LGALS1/EDIL3/SIRPA/MYADM/LAMA2/SELP/HLA-DOA/NDNF/ILK/CHST2/GATA3/IL27RA/ABI3BP/HLA-E/TGFB2/ITGA3/FBLN2/SFRP2/RUNX1/HLA-DPB1/HLA-DPA1/CD74/KDR/IL6ST/ETS1/ANXA1/PRKCA/CXCL12/FN1/RRAS/VCAM1/VTCN1/CCL21/HLA-DRA/AIF1/ITGA2/LAMB1/IL7R/C…	98
GO:0042060	wound healing	92/1151	442/18903	5.30385e-26	4.75225e-23	3.05297e-23	FGF2/CAV1/AXL/FZD7/FLNA/PDPN/MYLK/FERMT2/EMILIN1/ANXA6/ACTA2/DDR2/SYT11/SERPING1/IL33/VCL/TPM1/FBLN1/MCAM/CD40/CX3CL1/C1QTNF1/PRKG1/ANO6/CSRP1/GAS6/WFDC1/MYL9/PLPP3/ITGA5/TGFBR2/MYOF/DST/GLI3/CNN2/PDGFRB/TLN1/DYSF/AQP1/PDGFRA/F10/FGFR2/AJUBA/COL5A1/SELP/ACVRL1/P2RX1/NDNF/ILK/TGFB1/ANXA2/CD34/TIMP1/ITGB6/TGFB3/KANK1/TGFB2/ELK3/PLA2G4A/DUOX1/TLR4/KDR/PLAU/IL6ST/ANXA1/PRKCA/COL3A1/CDH3/FN1/THBD/PROC…	92
GO:0010810	regulation of cell-substrate adhesion	56/1151	222/18903	2.36612e-20	1.81718e-17	1.1674e-17	FZD7/FLNA/PDPN/EFEMP2/FERMT2/EMILIN1/FOXF1/MMP14/EGFLAM/VCL/PLEKHA2/FBLN1/CX3CL1/CORO1C/NID1/CSF1/LIMS2/ITGA5/EPHA3/SFRP1/GPM6B/COL16A1/EFNA5/FAM107A/ECM2/CCDC80/TLN1/EDIL3/MYADM/ACVRL1/NDNF/ILK/GBP1/ABI3BP/KANK1/BCL2/ITGA3/FBLN2/KDR/PLAU/PIK3R1/FN1/RRAS/CCL21/CD3E/RAC2/OLFM4/COL8A1/THBS1/FERMT1/RAC3/CCN1/MYOC/COL1A1/SERPINE1/NPY	56
GO:0001667	ameboidal-type cell migration	88/1151	492/18903	3.11538e-20	2.09353e-17	1.34494e-17	TNS1/EDNRA/ATP2B4/KANK2/FGF2/GJA1/SYDE1/ADGRA2/SERPINF1/SLC8A1/ANXA6/ACTA2/VSTM4/DDR2/ANGPT1/ISL1/EFNB1/FGFR1/DAAM2/CD40/CORO1C/CD248/PLPP3/TGFBR2/RHOJ/MCC/MET/CYGB/NRP2/PDLIM1/SNAI2/DCN/SPRED1/BMP4/ITGB4/AQP1/MEF2C/ROBO1/MAPRE2/ACVRL1/ILK/FGF7/PLXND1/TGFB1/GATA3/MMRN2/AMOTL2/KIT/LOXL2/TIMP1/EPHA2/KANK1/TGFB2/ITGA3/RHOB/SPARC/KDR/EDNRB/ID1/EDN3/ETS1/ANXA1/PRKCA/GADD45A/ATOH8/FN1/RRAS/GPC3/ENPP2/A…	88
GO:0050900	leukocyte migration	76/1151	398/18903	2.58861e-19	1.54626e-16	9.9336e-17	EMILIN1/ASB2/ITGA7/MMP14/JAM2/IL33/ITGA9/MSN/ROR2/ITGA1/MMP2/CX3CL1/CSF1/ANO6/GAS6/PDGFD/CNN2/RARRES2/SIRPA/IL34/ECM1/JAM3/CSF1R/CD200/SELP/CHST2/GATA3/KIT/LGALS3/IL27RA/CD34/S1PR1/TGFB2/ITGA3/PECAM1/CD74/EDNRB/GPSM3/S100A14/TRPV4/EDN3/ANXA1/CH25H/PIK3R1/CXCL12/VCAM1/GPR183/CCL21/AIF1/ITGA2/CXCR4/CCL5/SELPLG/ITGB2/RAC2/CXCL6/PYCARD/PTN/CORO1A/THBS1/CXCL17/PLVAP/CCL2/NBL1/DUSP1/EDN1/CXCL1/S100A9/C…	76
GO:0007160	cell-matrix adhesion	56/1151	238/18903	7.91649e-19	4.2559e-16	2.7341e-16	EFEMP2/FERMT2/EMILIN1/SORBS1/ITGA7/MMP14/VCL/PLEKHA2/ITGA9/ITGA1/CX3CL1/ACTN1/CORO1C/NID1/CSF1/ITGA5/EPHA3/SFRP1/GPM6B/COL16A1/EFNA5/FAM107A/ECM2/FBLN5/SGCE/ITGB4/TLN1/ZYX/JAM3/AJUBA/ACVRL1/ILK/TRIP6/COL17A1/ITGA8/CD34/CCN2/ITGB6/BCL2/ITGA3/ITGB8/KDR/PLAU/COL3A1/PIK3R1/FN1/RRAS/VCAM1/CCL21/ITGA2/CD3E/ITGB2/THBS1/FERMT1/MYOC/SERPINE1	56
GO:0001503	ossification	78/1151	429/18903	1.75881e-18	8.59578e-16	5.52216e-16	SLC24A3/FGF2/FERMT2/CHRDL1/SLC8A1/DDR2/MRC2/FHL2/NPR2/MMP14/FOXC1/COL6A1/ROR2/MMP2/TWIST2/CSF1/ANO6/PDLIM7/SFRP1/GPM6B/WWTR1/TNC/GLI3/SNAI2/SMOC1/BMP4/DCHS1/MEF2C/ECM1/CTSK/SRGN/ID3/FGFR2/ID4/TP63/ILK/PBX1/TGFB1/CCN2/S1PR1/EPHA2/LTBP3/CDH11/TGFB3/TGFB2/BCL2/COL1A2/CHRDL2/SFRP2/RUNX1/TMEM119/OMD/CRIM1/MGP/IL6ST/IGFBP5/GPC3/CEBPB/IGF2/DKK1/IFITM1/CLEC3B/IGFBP3/PTN/PENK/KLF10/CCN1/MYOC/LTF/COL1A1/AL…	78
GO:0003012	muscle system process	80/1151	455/18903	4.98795e-18	2.2346e-15	1.43557e-15	EDNRA/ATP2B4/GJA1/CAV1/SSPN/FLNA/MYLK/PPP1R12B/LMOD1/KCNJ8/SLC8A1/ANXA6/MYH11/ACTA2/MYOCD/SYNM/GATM/GSN/GNAO1/PDE5A/TPM1/PLN/ABCC9/KCNMA1/CALD1/PRKG1/CNN1/SULF2/MYL9/GJC1/ATP1A2/SMTN/CRYAB/SGCA/MYOF/DES/SCN7A/TPM2/KCNH2/LMCD1/FOXO1/DMD/STAC/TMOD1/P2RX1/GSTM2/TNFRSF1B/FBXO32/KIT/CCN2/APBB1/SULF1/CYBA/STAC2/EDNRB/CASQ2/IL6ST/TRPV4/IGFBP5/CACNA1H/EDN3/PRKCA/ATP1B1/DMPK/AIF1/ITGA2/CXCR4/CALCRL/PI16/M…	80
GO:0042692	muscle cell differentiation	74/1151	409/18903	1.81327e-17	7.49692e-15	4.81622e-15	CAV2/EDNRA/EHD2/FZD7/EFEMP2/LMOD1/SLC8A1/ASB2/MYH11/FOXF1/PGM5/FLNC/MYOCD/FHL2/ISL1/MMP14/JAM2/TPM1/CFL2/SPEG/ZEB1/ACTN1/NID1/POPDC2/CSRP1/RARB/PLPP7/MYL9/SGCB/LDB3/NFATC4/SMARCD3/MYOF/FHOD3/CNTNAP1/BMP4/PDGFRB/RBM38/DYSF/MEF2C/PDGFRA/FGFR2/DMD/LAMA2/TMOD1/ITGA8/TGFB1/KIT/RBPMS2/ACTC1/BCL2/TMEM119/EDNRB/PLEKHO1/IGFBP5/CACNA1H/HOPX/KLF5/DMPK/CD53/DLL1/LAMB1/IGF2/LAMB2/DKK1/SCGB3A1/PI16/SOD2/EDN1/C…	74
GO:0022612	gland morphogenesis	38/1151	123/18903	1.95232e-17	7.49692e-15	4.81622e-15	CAV1/MSN/MMP2/CSF1/HOXD13/LIMS2/SFRP1/TGFBR2/RARG/TNC/NTN1/GLI3/SNAI2/BMP4/FGFR2/CSF1R/ID4/TP63/FGF7/PLXND1/TGFB1/EPHA2/NTN4/TGFB3/SULF1/TGFB2/BCL2/NR3C1/IGFBP5/HPN/TNFAIP3/SERPINB5/CEBPB/PTN/CEACAM1/SEMA3C/IL6/TGM2	38
GO:0006936	muscle contraction	67/1151	351/18903	3.73936e-17	1.34019e-14	8.6097e-15	EDNRA/ATP2B4/GJA1/CAV1/SSPN/FLNA/MYLK/PPP1R12B/LMOD1/KCNJ8/SLC8A1/ANXA6/MYH11/ACTA2/MYOCD/SYNM/GSN/GNAO1/PDE5A/TPM1/PLN/ABCC9/KCNMA1/CALD1/PRKG1/CNN1/SULF2/MYL9/GJC1/ATP1A2/SMTN/CRYAB/SGCA/MYOF/DES/SCN7A/TPM2/KCNH2/DMD/STAC/TMOD1/P2RX1/GSTM2/KIT/CCN2/APBB1/SULF1/STAC2/EDNRB/CASQ2/TRPV4/CACNA1H/EDN3/ATP1B1/DMPK/ITGA2/CXCR4/CALCRL/MYOM1/ADRA2C/EDN1/CASQ1/PTGS2/ACTA1/TNNC1/CD38/CHGA	67
GO:0090130	tissue migration	69/1151	374/18903	8.02051e-17	2.69489e-14	1.73127e-14	ATP2B4/KANK2/FGF2/ADGRA2/SERPINF1/ACTA2/VSTM4/FOXF1/ANGPT1/FGFR1/DAAM2/CD40/CORO1C/PLPP3/ACTG2/TGFBR2/RHOJ/MCC/MET/NRP2/SNAI2/DCN/SPRED1/BMP4/MEF2C/ROBO1/MAPRE2/ACVRL1/FGF7/PLXND1/TGFB1/GATA3/MMRN2/KIT/LOXL2/EPHA2/ACTC1/KANK1/TGFB2/ITGA3/RHOB/SPARC/KDR/ID1/ETS1/ANXA1/PRKCA/GADD45A/ATOH8/RRAS/ENPP2/ITGA2/CLEC14A/RGCC/JCAD/AMOT/PTN/CEACAM1/CORO1A/THBS1/FERMT1/EDN1/PTGS2/S100A2/HSPB1/ACTA1/S100P/CYP…	69
GO:0007517	muscle organ development	66/1151	348/18903	9.08595e-17	2.8733e-14	1.84588e-14	CAV2/EDNRA/CAV1/MYLK/EFEMP2/TGFBR3/ASB2/CTF1/MYOCD/ISL1/JPH2/ITGA7/FOXC1/SVIL/TPM1/TAGLN/FHL1/CFL2/SPEG/HLF/MKX/TCF21/POPDC2/COL6A3/SOX15/SMTN/SGCB/CRYAB/SGCA/DES/CNTNAP1/SGCE/BMP4/HOXD10/MEF2C/ID3/FGFR2/FHL3/DMD/LAMA2/TGFB1/VAMP5/ELN/S1PR1/ACTC1/TGFB2/BCL2/CACNA1H/COL3A1/HEG1/KLF5/CNTFR/DLL1/HEYL/HOXD9/IGF2/FGFRL1/BTG2/CASQ1/EGR1/FOS/EGR2/ACTA1/EGR3/TNNC1/ATF3	66
GO:0060537	muscle tissue development	74/1151	422/18903	1.07667e-16	3.21566e-14	2.06583e-14	CAV2/EDNRA/FGF2/GJA1/CAV1/FZD7/MYLK/EFEMP2/TGFBR3/SLC8A1/ASB2/MYH11/PGM5/MYOCD/FHL2/ISL1/JPH2/ITGA7/FOXC1/SVIL/TPM1/PLN/CFL2/HLF/TCF21/POPDC2/CSRP1/RARB/GJC1/TGFBR2/ALDH1A2/SOX15/SGCB/EYA1/FHOD3/CNTNAP1/BMP4/PDGFRB/HOXD10/MEF2C/PDGFRA/FGFR2/DMD/ITGA8/TGFB1/VAMP5/ELN/S1PR1/ACTC1/TGFB2/BCL2/RUNX1/IGFBP5/COL3A1/HEG1/HOPX/KLF5/DLL1/HEYL/HOXD9/IGF2/DKK1/PI16/BTG2/EDN1/CASQ1/ID2/SEMA3C/EGR1/FOS/EGR2/AC…	74
GO:0050673	epithelial cell proliferation	80/1151	481/18903	1.41033e-16	3.99048e-14	2.56359e-14	CAV2/FGF2/CAV1/FZD7/SERPINF1/TGFBR3/VSTM4/ISL1/MMP14/RGN/FGFR1/ZEB1/IGFBP4/LIMS2/SERPINB1/SFRP1/ALDH1A2/MCC/EYA1/FST/COL8A2/NRP2/SNAI2/BMP4/HTRA1/MEF2C/ECM1/ROBO1/FGFR2/NGFR/ACVRL1/TP63/FGF7/TGFB1/ZFP36L1/GATA3/MMRN2/KIT/CD34/LOXL2/EPHA2/SULF1/TGFB2/CYBA/SFRP2/SPARC/KDR/EDNRB/ID1/IGFBP5/PRKCA/CXCL12/CDH3/ATOH8/PROK1/GPC3/HPN/TNFAIP3/SERPINB5/LAMB1/CEBPB/RGCC/JCAD/IGF2/IGFBP3/PTN/COL8A1/CEACAM1/TH…	80
GO:0001655	urogenital system development	66/1151	360/18903	5.30417e-16	1.42576e-13	9.15946e-14	EDNRA/KANK2/FGF2/SERPINF1/KCNJ8/ACTA2/FOXF1/MYOCD/ANGPT1/RGN/FOXC1/GLIS2/MMP2/TCF21/NID1/HOXD13/SULF2/RARB/SFRP1/ALDH1A2/PDGFD/WWTR1/RARG/EYA1/TNC/GFRA1/GLI3/BMP4/PDGFRB/AKR1B1/FBN1/HOXD11/AQP1/DCHS1/MEF2C/PDGFRA/ID3/FGFR2/ID4/SPRY1/TP63/ILK/PLXND1/PBX1/ITGA8/GATA3/COL4A1/CD34/SULF1/TGFB2/BCL2/ITGA3/PECAM1/EDNRB/ANXA1/GPC3/DLL1/SERPINB5/HEYL/LAMB2/VANGL2/ADAMTS1/SDC1/EGR1/MME/ALOX15B	66
GO:0060326	cell chemotaxis	61/1151	319/18903	9.14666e-16	2.34154e-13	1.50427e-13	FGF2/LPAR1/FGFR1/ITGA9/ITGA1/MMP2/CX3CL1/CSF1/ANO6/GAS6/MET/PDGFD/RARRES2/PDGFRB/PDGFRA/IL34/JAM3/CSF1R/KIT/LGALS3/S1PR1/EPHA2/TGFB2/CD74/KDR/EDNRB/GPSM3/S100A14/TRPV4/EDN3/ANXA1/CH25H/CXCL12/VCAM1/GPR183/CCL21/AIF1/CXCR4/CCL5/ITGB2/RAC2/ACKR3/CXCL6/PTN/CORO1A/THBS1/CXCL17/CCL2/NBL1/DUSP1/EDN1/CXCL1/S100A9/CCL19/CXCL2/HSPB1/IL6/SERPINE1/SAA1/EGR3/CHGA	61
GO:0071559	response to transforming growth factor beta	56/1151	277/18903	1.12682e-15	2.75355e-13	1.76895e-13	CAV2/CAV1/FERMT2/EMILIN1/TGFBR3/DDR2/DKK3/TGFB1I1/MYOCD/ZEB1/LTBP4/SFRP1/TGFBR2/COL4A2/PDGFD/MXRA5/LTBP1/CHST11/SPRED1/PDE2A/FBN1/HTRA1/ZYX/MEF2C/CTSK/FGFR2/SPRY2/SPRY1/LTBP2/ACVRL1/ITGA8/TGFB1/ZFP36L1/ITGB6/LTBP3/TGFB3/ZFP36L2/TGFB2/COL1A2/ITGA3/ITGB8/NR3C1/ID1/COL3A1/HTRA3/LRRC32/CLDN5/CLEC3B/PENK/THBS1/FERMT1/CLDN1/COL1A1/EDN1/FOS/DLX1	56
GO:0007159	leukocyte cell-cell adhesion	71/1151	414/18903	1.51635e-15	3.5443e-13	2.27695e-13	CAV1/NT5E/PRNP/JAM2/EFNB1/PDE5A/VSIR/MSN/ITGA5/TGFBR2/SMARCD3/GLI3/LGALS1/BMP4/SIRPA/SELP/FGL2/HLA-DOA/CHST2/CERCAM/GATA3/LGALS3/IL27RA/HLA-E/RUNX1/HLA-DPB1/HLA-DPA1/PECAM1/CD74/IL6ST/ETS1/ANXA1/CXCL12/VCAM1/VTCN1/CCL21/HLA-DRA/AIF1/LRRC32/IL7R/CEBPB/CD3E/CCL5/SELPLG/LAPTM5/CD4/ITGB2/IGF2/HLA-DRB1/RAC2/PYCARD/HLA-DQA1/PTPRC/CEACAM1/CORO1A/HLA-DQB2/HLA-DRB5/GPNMB/CCL2/IL2RG/S100A9/CCL19/SELE/HLA-D…	71
GO:0071560	cellular response to transforming growth factor beta stimulus	55/1151	271/18903	1.70754e-15	3.82489e-13	2.45721e-13	CAV2/CAV1/FERMT2/EMILIN1/TGFBR3/DDR2/DKK3/TGFB1I1/MYOCD/ZEB1/LTBP4/SFRP1/TGFBR2/COL4A2/PDGFD/LTBP1/CHST11/SPRED1/PDE2A/FBN1/HTRA1/ZYX/MEF2C/CTSK/FGFR2/SPRY2/SPRY1/LTBP2/ACVRL1/ITGA8/TGFB1/ZFP36L1/ITGB6/LTBP3/TGFB3/ZFP36L2/TGFB2/COL1A2/ITGA3/ITGB8/NR3C1/ID1/COL3A1/HTRA3/LRRC32/CLDN5/CLEC3B/PENK/THBS1/FERMT1/CLDN1/COL1A1/EDN1/FOS/DLX1	55
GO:0070371	ERK1 and ERK2 cascade	62/1151	340/18903	5.39374e-15	1.15987e-12	7.45131e-13	FGF2/FERMT2/EMILIN1/ACTA2/DDR2/PDGFC/ANGPT1/DENND2B/FBLN1/CX3CL1/GAS6/GSTP1/PDGFD/TNFAIP8L3/SPRED1/BMP4/PDGFRB/SIRPA/PDGFRA/TIMP3/FGFR2/CSF1R/NDRG2/SPRY2/SPRY1/TGFB1/ZFP36L1/GBP1/CCN2/EPHA2/CAVIN3/ZFP36L2/TLR4/CD74/KDR/TRPV4/PRKCA/FN1/RRAS/GPR183/CCL21/AKAP12/DUSP5/CCL5/CD4/HLA-DRB1/ACKR3/PYCARD/RAMP3/DUSP6/PTPRC/CEACAM1/CXCL17/CCN1/SERPINF2/GPNMB/CCL2/EDN1/CCL19/ATF3/PSCA/NPY	62
GO:0043410	positive regulation of MAPK cascade	78/1151	496/18903	8.18476e-15	1.69236e-12	1.08721e-12	CAV2/FGF2/FZD7/FERMT2/ACTA2/DDR2/PDGFC/LPAR1/ANGPT1/DENND2B/FGFR1/PDE5A/ROR2/ITGA1/CD40/CX3CL1/C1QTNF1/IGFBP4/CSPG4/GAS6/DOK4/PDGFD/TNFAIP8L3/BMP4/PDGFRB/MEF2C/PDGFRA/IL34/ROBO1/FGFR2/CSF1R/AJUBA/SPRY2/TLR3/TGFB1/AVPI1/KIT/CCN2/CAVIN3/TGFB3/TGFB2/DIXDC1/IGFBP6/ADRA1D/TLR4/CD74/KDR/TRPV4/EDN3/PRKCA/GADD45A/PROK1/GPR183/CCL21/AKAP12/CCL5/LAPTM5/CD4/JCAD/IGF2/HLA-DRB1/DKK1/ACKR3/IGFBP3/PYCARD/RAMP3/…	78
GO:0048660	regulation of smooth muscle cell proliferation	42/1151	175/18903	8.97532e-15	1.78709e-12	1.14807e-12	FGF2/GJA1/EFEMP2/OGN/DDR2/MYOCD/TPM1/MMP2/CX3CL1/PRKG1/CNN1/TGFBR2/PDGFD/BMP4/PDGFRB/MEF2C/FGFR2/NDRG2/TGFB1/ELN/S1PR1/RBPMS2/TGFB3/CYBA/TLR4/IGFBP5/AIF1/TNFAIP3/ITGA2/CALCRL/CCL5/IGFBP3/THBS1/ADAMTS1/SERPINF2/SOD2/EDN1/ID2/PTGS2/ANG/IL6/NR4A3	42
GO:0010811	positive regulation of cell-substrate adhesion	35/1151	125/18903	1.04657e-14	2.00941e-12	1.2909e-12	FLNA/EFEMP2/FERMT2/EMILIN1/FOXF1/EGFLAM/PLEKHA2/CX3CL1/NID1/CSF1/LIMS2/ITGA5/SFRP1/COL16A1/ECM2/CCDC80/EDIL3/MYADM/NDNF/ILK/ABI3BP/ITGA3/FBLN2/KDR/FN1/RRAS/CCL21/CD3E/OLFM4/COL8A1/FERMT1/RAC3/CCN1/MYOC/NPY	35
GO:0010631	epithelial cell migration	64/1151	366/18903	1.53095e-14	2.75022e-12	1.76681e-12	ATP2B4/KANK2/FGF2/ADGRA2/SERPINF1/VSTM4/ANGPT1/FGFR1/DAAM2/CD40/CORO1C/PLPP3/TGFBR2/RHOJ/MCC/MET/NRP2/SNAI2/DCN/SPRED1/BMP4/MEF2C/ROBO1/MAPRE2/ACVRL1/FGF7/PLXND1/TGFB1/GATA3/MMRN2/KIT/LOXL2/EPHA2/KANK1/TGFB2/ITGA3/RHOB/SPARC/KDR/ID1/ETS1/ANXA1/PRKCA/GADD45A/ATOH8/RRAS/ENPP2/ITGA2/CLEC14A/RGCC/JCAD/AMOT/PTN/CEACAM1/CORO1A/THBS1/FERMT1/EDN1/PTGS2/S100A2/HSPB1/S100P/CYP1B1/EGR3	64
GO:0007229	integrin-mediated signaling pathway	33/1151	113/18903	1.58124e-14	2.75022e-12	1.76681e-12	FLNA/FERMT2/ITGA7/ITGA9/ITGA1/NID1/LIMS2/PLPP3/ITGA5/COL16A1/DST/ITGB4/TLN1/ZYX/LAMA2/ILK/ITGA8/CCN2/TIMP1/ITGB6/ITGA3/ITGB8/COL3A1/FN1/ITGA2/LAMB1/ITGB2/LAMB2/PTN/CEACAM1/FERMT1/ADAMTS1/CD177	33
GO:0097529	myeloid leukocyte migration	50/1151	242/18903	1.58588e-14	2.75022e-12	1.76681e-12	EMILIN1/MMP14/ITGA9/ROR2/ITGA1/MMP2/CX3CL1/CSF1/ANO6/PDGFD/CNN2/RARRES2/SIRPA/IL34/JAM3/CSF1R/CD200/KIT/LGALS3/TGFB2/PECAM1/CD74/EDNRB/S100A14/TRPV4/EDN3/ANXA1/PIK3R1/CXCL12/CCL21/AIF1/CCL5/ITGB2/RAC2/CXCL6/THBS1/CXCL17/CCL2/NBL1/DUSP1/EDN1/CXCL1/S100A9/CCL19/CXCL2/IL6/CD177/SERPINE1/SAA1/CHGA	50
GO:0060485	mesenchyme development	58/1151	313/18903	2.00071e-14	3.36118e-12	2.15931e-12	EDNRA/FLNA/PDPN/FERMT2/TGFBR3/ANXA6/ACTA2/FOXF1/TGFB1I1/ISL1/DACT3/FOXC1/EFNB1/FGFR1/TCF21/CORO1C/EPHA3/SFRP1/ACTG2/TGFBR2/ALDH1A2/PHLDB1/WWTR1/NRP2/SNAI2/SPRED1/BMP4/PDGFRB/DCHS1/MEF2C/ROBO1/FGFR2/SPRY2/SPRY1/ACVRL1/TGFB1/ZFP36L1/GATA3/LOXL2/ACTC1/TGFB3/TGFB2/BCL2/SFRP2/S100A4/EDNRB/EDN3/FN1/HPN/FRZB/HEYL/RGCC/FOXF2/COL1A1/EDN1/SEMA3C/IL6/ACTA1	58
GO:0048659	smooth muscle cell proliferation	42/1151	179/18903	2.08547e-14	3.39741e-12	2.18259e-12	FGF2/GJA1/EFEMP2/OGN/DDR2/MYOCD/TPM1/MMP2/CX3CL1/PRKG1/CNN1/TGFBR2/PDGFD/BMP4/PDGFRB/MEF2C/FGFR2/NDRG2/TGFB1/ELN/S1PR1/RBPMS2/TGFB3/CYBA/TLR4/IGFBP5/AIF1/TNFAIP3/ITGA2/CALCRL/CCL5/IGFBP3/THBS1/ADAMTS1/SERPINF2/SOD2/EDN1/ID2/PTGS2/ANG/IL6/NR4A3	42
GO:0090132	epithelium migration	64/1151	369/18903	2.27459e-14	3.59653e-12	2.31051e-12	ATP2B4/KANK2/FGF2/ADGRA2/SERPINF1/VSTM4/ANGPT1/FGFR1/DAAM2/CD40/CORO1C/PLPP3/TGFBR2/RHOJ/MCC/MET/NRP2/SNAI2/DCN/SPRED1/BMP4/MEF2C/ROBO1/MAPRE2/ACVRL1/FGF7/PLXND1/TGFB1/GATA3/MMRN2/KIT/LOXL2/EPHA2/KANK1/TGFB2/ITGA3/RHOB/SPARC/KDR/ID1/ETS1/ANXA1/PRKCA/GADD45A/ATOH8/RRAS/ENPP2/ITGA2/CLEC14A/RGCC/JCAD/AMOT/PTN/CEACAM1/CORO1A/THBS1/FERMT1/EDN1/PTGS2/S100A2/HSPB1/S100P/CYP1B1/EGR3	64
GO:0070372	regulation of ERK1 and ERK2 cascade	58/1151	315/18903	2.67222e-14	4.10453e-12	2.63686e-12	FGF2/FERMT2/EMILIN1/ACTA2/DDR2/PDGFC/ANGPT1/DENND2B/FBLN1/CX3CL1/GAS6/GSTP1/PDGFD/TNFAIP8L3/SPRED1/BMP4/PDGFRB/SIRPA/PDGFRA/TIMP3/FGFR2/CSF1R/NDRG2/SPRY2/SPRY1/TGFB1/GBP1/CCN2/EPHA2/CAVIN3/TLR4/CD74/KDR/TRPV4/PRKCA/FN1/RRAS/GPR183/CCL21/AKAP12/CCL5/CD4/HLA-DRB1/ACKR3/PYCARD/RAMP3/DUSP6/PTPRC/CEACAM1/CXCL17/CCN1/SERPINF2/GPNMB/CCL2/CCL19/ATF3/PSCA/NPY	58
GO:1901342	regulation of vasculature development	62/1151	355/18903	4.21981e-14	6.18374e-12	3.9726e-12	ATP2B4/FGF2/ADGRA2/SERPINF1/EMILIN1/PTGIS/ISL1/FOXC1/CD40/HSPB6/ITGA5/SFRP1/TGFBR2/RHOJ/COL4A2/PRKCB/DCN/SPRED1/AQP1/ECM1/SPRY2/TLR3/ACVRL1/PLXND1/CD34/EPHA2/STAB1/SULF1/TGFB2/RHOB/SFRP2/RUNX1/C3/SPARC/ITGB8/KDR/ID1/ETS1/PRKCA/GADD45A/PROK1/RRAS/ENPP2/DLL1/TNFAIP3/CXCR4/CLDN5/HSPG2/RGCC/KLF2/JCAD/AMOT/CYBB/CEACAM1/THBS1/ADAMTS1/GPNMB/HSPB1/THBS2/IL6/SERPINE1/CYP1B1	62
GO:0002685	regulation of leukocyte migration	48/1151	231/18903	4.25592e-14	6.18374e-12	3.9726e-12	EMILIN1/MMP14/JAM2/IL33/MSN/CX3CL1/CSF1/ANO6/GAS6/PDGFD/CNN2/RARRES2/IL34/ECM1/JAM3/CSF1R/CD200/SELP/CHST2/LGALS3/IL27RA/CD74/GPSM3/S100A14/TRPV4/EDN3/ANXA1/PIK3R1/CXCL12/CCL21/AIF1/ITGA2/CCL5/RAC2/PYCARD/PTN/CORO1A/THBS1/CXCL17/PLVAP/CCL2/NBL1/DUSP1/EDN1/CCL19/SELE/IL6/SERPINE1	48
GO:0045765	regulation of angiogenesis	61/1151	349/18903	6.55324e-14	9.10071e-12	5.84654e-12	ATP2B4/FGF2/ADGRA2/SERPINF1/EMILIN1/PTGIS/ISL1/FOXC1/CD40/HSPB6/ITGA5/SFRP1/TGFBR2/RHOJ/COL4A2/PRKCB/DCN/SPRED1/AQP1/ECM1/SPRY2/TLR3/ACVRL1/PLXND1/CD34/EPHA2/STAB1/SULF1/TGFB2/RHOB/SFRP2/RUNX1/C3/SPARC/ITGB8/KDR/ETS1/PRKCA/GADD45A/PROK1/RRAS/ENPP2/DLL1/TNFAIP3/CXCR4/CLDN5/HSPG2/RGCC/KLF2/JCAD/AMOT/CYBB/CEACAM1/THBS1/ADAMTS1/GPNMB/HSPB1/THBS2/IL6/SERPINE1/CYP1B1	61
GO:0032970	regulation of actin filament-based process	67/1151	406/18903	6.60208e-14	9.10071e-12	5.84654e-12	CAV1/FLNA/PDPN/FERMT2/LMOD1/FRMD6/SYNPO2/ACTA2/LPAR1/KIRREL1/SYNPO/GSN/CDC42EP3/SVIL/TPM1/PLN/RND3/DAAM2/CFL2/CX3CL1/RND2/ATP1A2/EPHA3/SFRP1/GPM6B/MET/EFNA5/FHOD3/FAM107A/CNN2/FCHSD2/PDGFRB/MYADM/PDGFRA/JAM3/CSF1R/CDC42EP4/PAM/TMOD1/ELN/CCN2/S1PR1/CAPG/TGFB3/KANK1/DIXDC1/RHOB/ID1/HCLS1/PIK3R1/CXCL12/CCL21/RGCC/LRP1/RAC2/PYCARD/BST2/GMFG/CORO1A/RAC3/MYOC/RHPN1/SERPINF2/EDN1/TMSB15A/CDC42EP5/TNNC1	67
GO:0070663	regulation of leukocyte proliferation	52/1151	269/18903	7.9449e-14	1.05001e-11	6.74553e-12	PRNP/IL33/EFNB1/PDE5A/VSIR/CD40/CSF1/GSTP1/TGFBR2/INPP5D/CNN2/BMP4/MEF2C/IL34/CSF1R/TNFRSF1B/RASSF5/KIT/LGALS3/IL27RA/HLA-E/BCL2/HLA-DPB1/TLR4/HLA-DPA1/CD74/IL6ST/AHR/ANXA1/VCAM1/GPR183/VTCN1/AIF1/TNFAIP3/LRRC32/CEBPB/CD3E/CCL5/IGF2/HLA-DRB1/RAC2/PYCARD/BST2/PTPRC/CORO1A/TYROBP/GPNMB/CCL19/HLA-A/IL6/SCGB1A1/CD38	52
GO:0002573	myeloid leukocyte differentiation	46/1151	218/18903	8.00788e-14	1.05001e-11	6.74553e-12	TSPAN2/MITF/ROR2/CSF1/IFI16/SFRP1/TGFBR2/INPP5D/BMP4/SH3PXD2A/FBN1/IL34/CSF1R/TLR3/TGFB1/ZFP36L1/ANXA2/GATA3/KIT/EPHA2/ITGB6/RUNX1/TLR4/CD74/ITGB8/PRKCA/HCLS1/PIK3R1/GPC3/GPR183/EVI2B/CEBPB/CD4/C1QC/HLA-DRB1/CEACAM1/KLF10/TYROBP/LTF/CCL19/ID2/UBD/FASN/FOS/JUNB/MT1G	46
GO:0001704	formation of primary germ layer	34/1151	127/18903	1.06552e-13	1.36387e-11	8.76184e-12	GJA1/FZD7/FOXF1/ITGA7/MMP14/FOXC1/COL6A1/MMP2/ITGA5/COL4A2/EYA1/BMP4/ITGB4/ETS2/FGFR2/SOX7/COL5A1/ITGA8/EPHA2/LAMB3/ITGA3/SFRP2/ATOH8/FN1/ITGA2/LAMB1/DUSP5/ITGB2/DKK1/COL8A1/COL7A1/DUSP1/COL5A2/DUSP2	34
GO:0022407	regulation of cell-cell adhesion	75/1151	490/18903	1.14713e-13	1.43418e-11	9.21355e-12	CAV1/PDPN/PRNP/EFNB1/PDE5A/VSIR/CX3CL1/C1QTNF1/PRKG1/PLPP3/TGFBR2/EFNA5/SMARCD3/GLI3/ADAM19/LGALS1/BMP4/SIRPA/MYADM/SELP/FGL2/HLA-DOA/CHST2/TGFB1/GATA3/LGALS3/IL27RA/HLA-E/RUNX1/HLA-DPB1/HLA-DPA1/CD74/IL6ST/FXYD5/TRPV4/ETS1/ANXA1/PRKCA/CXCL12/VCAM1/VTCN1/CCL21/HLA-DRA/AIF1/LRRC32/IL7R/CEBPB/RGCC/CD3E/CCL5/LAPTM5/CD4/ITGB2/IGF2/HLA-DRB1/PYCARD/HLA-DQA1/PTPRC/CEACAM1/CORO1A/HLA-DQB2/HLA-DRB5/SERPIN…	75
GO:0048732	gland development	70/1151	441/18903	1.28414e-13	1.56898e-11	1.00796e-11	EDNRA/FGF2/CAV1/SERPINF1/TGFBR3/FOXF1/DKK3/ISL1/RGN/FOXC1/MSN/MMP2/TCF21/LMO4/CSF1/HOXD13/LIMS2/SFRP1/TGFBR2/ALDH1A2/MET/RARG/TNC/NTN1/GLI3/SNAI2/BMP4/PDGFRA/ROBO1/FGFR2/CSF1R/ID4/PAM/TP63/FGF7/PLXND1/PBX1/TGFB1/GATA3/EPHA2/NTN4/TGFB3/SULF1/TGFB2/BCL2/NR3C1/SLC29A1/IGFBP5/ANXA1/HPN/TNFAIP3/ITGA2/SERPINB5/FRZB/CEBPB/HOXD9/IGF2/PTN/TFCP2L1/CEACAM1/CLDN1/SOD2/EDN1/ID2/SEMA3C/FASN/IL6/TGM2/CYP1B1/ALO…	70
GO:2000146	negative regulation of cell motility	64/1151	383/18903	1.35067e-13	1.6136e-11	1.03662e-11	ATP2B4/FGF2/GJA1/SERPINF1/DPYSL3/EMILIN1/BMERB1/MYOCD/MITF/RGN/IL33/VCL/TPM1/FBLN1/CX3CL1/PODN/CORO1C/PRKG1/SPOCK3/SFRP1/MCC/ATP1B2/CYGB/CLIC4/CNN2/DCN/SPRED1/MEF2C/ROBO1/CD200/NGFR/ACVRL1/TGFB1/GATA3/MMRN2/IL27RA/TIMP1/KANK1/SULF1/BCL2/RHOB/SFRP2/CD74/IGFBP5/GADD45A/COL3A1/CXCL12/RRAS/CCL21/AIF1/CLDN5/RGCC/LRP1/IFITM1/IGFBP3/BST2/THBS1/CCL2/NBL1/DUSP1/PTPRT/SERPINE1/CYP1B1/ALOX15B	64
GO:0033627	cell adhesion mediated by integrin	28/1151	88/18903	1.43166e-13	1.67318e-11	1.07489e-11	EMILIN1/ITGA7/ITGA9/ITGA1/PLPP3/ITGA5/COL16A1/SNAI2/ITGB4/FBN1/JAM3/ITGA8/EPHA2/ITGB6/TGFB2/ITGA3/SFRP2/ITGB8/PLAU/CCL21/ITGA2/CD3E/CCL5/ITGB2/FERMT1/RAC3/SERPINE1/CYP1B1	28
GO:0072001	renal system development	57/1151	318/18903	1.46983e-13	1.67751e-11	1.07767e-11	EDNRA/KANK2/FGF2/SERPINF1/KCNJ8/ACTA2/FOXF1/MYOCD/ANGPT1/RGN/FOXC1/GLIS2/TCF21/NID1/SULF2/RARB/SFRP1/ALDH1A2/PDGFD/WWTR1/EYA1/GFRA1/GLI3/BMP4/PDGFRB/AKR1B1/FBN1/HOXD11/AQP1/DCHS1/MEF2C/PDGFRA/ID3/FGFR2/SPRY1/ILK/PLXND1/PBX1/ITGA8/GATA3/COL4A1/CD34/SULF1/TGFB2/BCL2/ITGA3/PECAM1/EDNRB/GPC3/DLL1/HEYL/LAMB2/VANGL2/ADAMTS1/SDC1/EGR1/MME	57
GO:0033002	muscle cell proliferation	49/1151	247/18903	1.49777e-13	1.67751e-11	1.07767e-11	CAV2/FGF2/GJA1/EFEMP2/OGN/TGFBR3/DDR2/MYOCD/ANGPT1/FOXC1/TPM1/MMP2/CX3CL1/PRKG1/CNN1/TGFBR2/PDGFD/BMP4/PDGFRB/MEF2C/FGFR2/NDRG2/TGFB1/ELN/S1PR1/RBPMS2/TGFB3/TGFB2/CYBA/RUNX1/TLR4/IGFBP5/AIF1/TNFAIP3/ITGA2/CALCRL/CCL5/IGFBP3/THBS1/ADAMTS1/SERPINF2/SOD2/EDN1/ID2/PTGS2/ANG/IL6/FOS/NR4A3	49
GO:0070482	response to oxygen levels	59/1151	337/18903	1.57886e-13	1.73224e-11	1.11284e-11	EDNRA/CAV1/PDPN/KCNMB1/TGFBR3/SLC8A1/PTGIS/DDR2/LPAR1/MYOCD/MMP14/KCNMA1/MMP2/SFRP1/TGFBR2/CYGB/SLC2A4/CRYAB/PDLIM1/PDGFRB/FOXO1/AQP1/EPAS1/AJUBA/PAM/ACVRL1/NDNF/ZFP36L1/CD34/CCN2/LOXL2/TGFB3/TGFB2/BCL2/CYBA/PLAU/SLC29A1/ATP1B1/CXCL12/VCAM1/ITGA2/CXCR4/RGCC/PENK/CYBB/THBS1/COL1A1/SOD2/EDN1/ITPR1/SOD3/PTGS2/DDIT4/ANG/AQP3/EGR1/KCNK3/FOS/CD38	59
GO:0061448	connective tissue development	52/1151	274/18903	1.70711e-13	1.83548e-11	1.17916e-11	FGF2/OGN/ANXA6/PRRX1/ACTA2/EFEMP1/SH3PXD2B/ZNF516/ZEB1/CSF1/SULF2/RARB/TGFBR2/PDGFD/RARG/GLI3/CHST11/SNAI2/BMP4/PDGFRB/MEF2C/ECM1/TGFBI/CYTL1/CTSK/ID4/COL5A1/ACVRL1/TGFB1/CD34/CCN2/LOXL2/TIMP1/SPART/LTBP3/SULF1/COL27A1/CHRDL2/SFRP2/RUNX1/ITGB8/MGP/TRPV4/COL3A1/ARID5A/FRZB/SELENOM/CCN1/BGN/COL1A1/EDN1/EGR1	52
GO:0030595	leukocyte chemotaxis	48/1151	240/18903	1.93377e-13	2.03842e-11	1.30954e-11	ITGA9/ITGA1/MMP2/CX3CL1/CSF1/ANO6/GAS6/RARRES2/IL34/JAM3/CSF1R/KIT/LGALS3/S1PR1/TGFB2/CD74/EDNRB/GPSM3/S100A14/TRPV4/EDN3/ANXA1/CH25H/CXCL12/GPR183/CCL21/AIF1/CXCR4/CCL5/ITGB2/RAC2/CXCL6/PTN/CORO1A/THBS1/CXCL17/CCL2/NBL1/DUSP1/EDN1/CXCL1/S100A9/CCL19/CXCL2/IL6/SERPINE1/SAA1/CHGA	48
GO:0001819	positive regulation of cytokine production	74/1151	486/18903	2.20353e-13	2.27811e-11	1.46352e-11	ISL1/IL33/GPRC5B/CD40/CX3CL1/CLU/IFI16/SULF2/STING1/AFAP1L2/RAB7B/NFATC4/ARHGEF2/NLRP1/CASP1/CSF1R/CD200/TLR3/TGFB1/RFTN1/GATA3/KIT/IL27RA/CD34/HLA-E/LUM/SULF1/CYBA/RUNX1/C3/HLA-DPB1/TLR4/HLA-DPA1/CD74/GPSM3/IL6ST/TRPV4/ANXA1/HEG1/PIK3R1/VTCN1/CD14/ARID5A/AKAP12/AIF1/CEBPB/RGCC/CD3E/LAPTM5/CD4/PYCARD/PTPRC/CYBB/THBS1/CXCL17/FERMT1/CD2/TYROBP/HLA-F/SERPINF2/CCL19/HLA-A/PTGS2/HSPB1/EGR1/IL6/SERPINE…	74
GO:0002683	negative regulation of immune system process	70/1151	449/18903	3.1433e-13	3.18837e-11	2.04829e-11	AXL/EMILIN1/PRNP/FOXF1/ANGPT1/SYT11/SERPING1/IL33/PDE5A/VSIR/CX3CL1/IFI16/SFRP1/GLI3/INPP5D/CNN2/SNAI2/BMP4/FBN1/SERPINB9/CD200/FGL2/TLR3/HLA-DOA/TGFB1/A2M/GBP1/TMEM176A/RASSF5/LGALS3/IL27RA/HLA-E/TGFB3/TMEM176B/TGFB2/RUNX1/TLR4/CD74/AHR/ANXA1/COL3A1/PIK3R1/CXCL12/VTCN1/CCL21/DLL1/TNFAIP3/LRRC32/IL7R/CEBPB/LAPTM5/C1QC/HLA-DRB1/BST2/CST7/PTPRC/CEACAM1/THBS1/TYROBP/HLA-F/LTF/GPNMB/CCL2/NBL1/DUSP1/I…	70
GO:0085029	extracellular matrix assembly	20/1151	46/18903	5.12353e-13	5.10076e-11	3.27686e-11	EFEMP2/EMILIN1/MYH11/GAS6/GPM6B/PHLDB1/FBLN5/MFAP4/ANTXR1/TGFB1/LAMB3/NTN4/LTBP3/COL1A2/QSOX1/THSD4/COL3A1/LAMB1/RGCC/LAMB2	20
GO:0032103	positive regulation of response to external stimulus	71/1151	464/18903	5.37657e-13	5.25535e-11	3.37618e-11	FGF2/FLNA/EMILIN1/LPAR1/IL33/FGFR1/GPRC5B/CX3CL1/CSF1/IFI16/ANO6/GAS6/STING1/MET/PDGFD/NLRP1/LGALS1/RARRES2/PDE2A/PDGFRB/CASP1/IL34/CSF1R/TLR3/OPTN/TGFB1/MMRN2/S1PR1/HLA-E/CYBA/C3/TLR4/CD74/KDR/GPSM3/PLAU/IL6ST/S100A14/TRPV4/EDN3/ETS1/PRKCA/CXCL12/THBD/ALOX5AP/CD14/CCL21/AIF1/ITGA2/CXCR4/CEBPB/CCL5/PLSCR1/RAC2/PYCARD/PTN/THBS1/CXCL17/TYROBP/HLA-F/SERPINF2/EDN1/S100A9/CCL19/COCH/PTGS2/HSPB1/IL6/SE…	71
GO:0007369	gastrulation	42/1151	196/18903	5.62569e-13	5.40066e-11	3.46953e-11	GJA1/FZD7/FOXF1/ITGA7/MMP14/FOXC1/COL6A1/MMP2/PLPP3/ITGA5/SFRP1/TGFBR2/COL4A2/PHLDB1/EYA1/BMP4/ITGB4/ETS2/MYADM/FGFR2/SOX7/COL5A1/ITGA8/EPHA2/LAMB3/ITGA3/SFRP2/ATOH8/FN1/GPC3/ITGA2/LAMB1/DUSP5/ITGB2/DKK1/AMOT/COL8A1/COL7A1/DUSP1/COL5A2/DUSP2/NR4A3	42
GO:0042063	gliogenesis	55/1151	310/18903	6.09343e-13	5.74706e-11	3.69207e-11	FGF2/TSPAN2/TRPC4/BMERB1/LPAR1/MMP14/IL33/DAAM2/CNTN1/ROR2/CX3CL1/CLU/CSF1/CSPG4/ANO1/PLPP3/LEPR/ATP1B2/NTN1/GLI3/CNTNAP1/VIM/ITGB4/IL34/CSF1R/ID4/PRDM8/ILK/TGFB1/TNFRSF1B/TGFB2/NDN/MAL/TLR4/IL6ST/ANXA1/COL3A1/RRAS/MXRA8/GPR183/DLL1/LAMB1/CXCR4/C1QA/LRP1/LAMB2/PTN/PENK/MYOC/CCL2/S100A9/ID2/IL6/EGR2/DLX1	55
GO:0048545	response to steroid hormone	58/1151	339/18903	6.96542e-13	6.45623e-11	4.14765e-11	KANK2/CAV1/SERPINF1/ISL1/PTGER2/TCF21/SRD5A2/ATP1A2/SFRP1/TGFBR2/FAM107A/BMP4/IGFBP7/PTGDS/AQP1/PAQR8/PAM/TP63/TGFB1/ZFP36L1/A2M/FBXO32/CCN2/TGFB3/FIBIN/ZFP36L2/TGFB2/BCL2/CYBA/NR3C1/SCNN1A/ANXA1/MAOB/AIF1/HEYL/CYBB/THBS1/CLDN1/COL1A1/EDN1/ALPL/SDC1/PER1/PTGS2/SCGB2A1/DDIT4/SGK1/SCNN1G/IL6/SCGB1A1/FOS/ZFP36/ACTA1/NR4A3/CYP1B1/CD38/FOSB/OR51E2	58
GO:0051146	striated muscle cell differentiation	53/1151	293/18903	7.32148e-13	6.62588e-11	4.25664e-11	CAV2/EHD2/FZD7/LMOD1/SLC8A1/ASB2/MYH11/PGM5/FLNC/MYOCD/FHL2/ISL1/MMP14/JAM2/TPM1/CFL2/POPDC2/CSRP1/RARB/PLPP7/MYL9/SGCB/LDB3/MYOF/FHOD3/CNTNAP1/BMP4/PDGFRB/RBM38/MEF2C/PDGFRA/TMOD1/TGFB1/ACTC1/BCL2/TMEM119/PLEKHO1/IGFBP5/CACNA1H/HOPX/KLF5/DMPK/CD53/DLL1/IGF2/DKK1/SCGB3A1/PI16/EDN1/CASQ1/SDC1/KRT19/ACTA1	53
GO:0050867	positive regulation of cell activation	71/1151	467/18903	7.39495e-13	6.62588e-11	4.25664e-11	CAV1/AXL/FLNA/ACTA2/DDR2/MMP14/IL33/EFNB1/VSIR/CD40/GAS6/TGFBR2/SOX15/SMARCD3/GLI3/INPP5D/LGALS1/PDGFRB/SIRPA/MEF2C/SELP/HLA-DOA/TGFB1/GATA3/IL27RA/CCN2/HLA-E/BCL2/RUNX1/HLA-DPB1/PLA2G4A/TLR4/HLA-DPA1/CD74/IL6ST/ANXA1/VCAM1/GPR183/VTCN1/CCL21/HLA-DRA/AIF1/IL7R/CD3E/CCL5/CD4/ITGB2/IGF2/HLA-DRB1/PYCARD/HLA-DQA1/PTPRC/CORO1A/THBS1/CD2/TYROBP/HLA-F/HLA-DQB2/HLA-DRB5/CCL2/IL2RG/CCL19/HLA-DQB1/HLA-A/IL…	71
GO:0032963	collagen metabolic process	30/1151	107/18903	8.04805e-13	7.09284e-11	4.55663e-11	EMILIN1/DDR2/MRC2/MMP14/VSIR/MMP2/CTSB/CYGB/VIM/BMP4/PDGFRB/MFAP4/PCOLCE/CTSK/COL5A1/TGFB1/CCN2/TGFB3/COL1A2/P3H3/RUNX1/CTSS/ITGA2/RGCC/RCN3/SERPINF2/COL1A1/P3H2/MMP7/IL6	30
GO:0060348	bone development	46/1151	233/18903	1.00192e-12	8.68763e-11	5.58116e-11	MEIS1/GJA1/FLNA/OGN/ANXA6/DDR2/PDGFC/NPR2/MMP14/RGN/SH3PXD2B/FOXC1/PLS3/SRD5A2/SULF2/RARB/LEPR/TGFBR2/RARG/GLI3/BMP4/FBN1/DCHS1/MEF2C/ECM1/FGFR2/ANXA2/KIT/ITGB6/LTBP3/TGFB3/SULF1/COL27A1/TMEM119/KDR/TRPV4/COL3A1/PTPRC/TYROBP/MYOC/LTF/BGN/COL1A1/ALPL/TGM2/ACP5	46
GO:0050921	positive regulation of chemotaxis	35/1151	144/18903	1.03099e-12	8.7978e-11	5.65194e-11	FGF2/LPAR1/FGFR1/CSF1/ANO6/GAS6/MET/PDGFD/RARRES2/PDGFRB/IL34/CSF1R/TGFB1/S1PR1/CD74/KDR/GPSM3/S100A14/TRPV4/EDN3/CXCL12/CCL21/AIF1/ITGA2/CXCR4/CCL5/RAC2/PTN/THBS1/CXCL17/EDN1/CCL19/HSPB1/IL6/SERPINE1	35
GO:0001666	response to hypoxia	53/1151	296/18903	1.11037e-12	9.32713e-11	5.992e-11	EDNRA/CAV1/KCNMB1/TGFBR3/SLC8A1/PTGIS/DDR2/MYOCD/MMP14/KCNMA1/MMP2/SFRP1/TGFBR2/CYGB/SLC2A4/CRYAB/PDLIM1/AQP1/EPAS1/AJUBA/PAM/ACVRL1/NDNF/ZFP36L1/CD34/LOXL2/TGFB3/TGFB2/BCL2/CYBA/PLAU/SLC29A1/ATP1B1/CXCL12/VCAM1/ITGA2/CXCR4/RGCC/PENK/CYBB/THBS1/SOD2/EDN1/ITPR1/SOD3/PTGS2/DDIT4/ANG/AQP3/EGR1/KCNK3/FOS/CD38	53
GO:0032640	tumor necrosis factor production	40/1151	184/18903	1.23163e-12	1.00322e-10	6.44494e-11	AXL/ANGPT1/ISL1/SYT11/IL33/VSIR/CX3CL1/CLU/GAS6/GSTP1/NFATC4/ARHGEF2/SIRPA/TLR3/IL27RA/CD34/HLA-E/CYBA/TLR4/PIK3R1/CD14/ARID5A/AKAP12/TNFAIP3/PYCARD/PTPRC/CYBB/THBS1/CD2/TYROBP/LTF/GPNMB/CCL19/HSPB1/IL6/ZFP36/ACP5/ORM2/SPON2/ORM1	40
GO:0032680	regulation of tumor necrosis factor production	40/1151	184/18903	1.23163e-12	1.00322e-10	6.44494e-11	AXL/ANGPT1/ISL1/SYT11/IL33/VSIR/CX3CL1/CLU/GAS6/GSTP1/NFATC4/ARHGEF2/SIRPA/TLR3/IL27RA/CD34/HLA-E/CYBA/TLR4/PIK3R1/CD14/ARID5A/AKAP12/TNFAIP3/PYCARD/PTPRC/CYBB/THBS1/CD2/TYROBP/LTF/GPNMB/CCL19/HSPB1/IL6/ZFP36/ACP5/ORM2/SPON2/ORM1	40
GO:0048762	mesenchymal cell differentiation	48/1151	252/18903	1.27835e-12	1.02573e-10	6.58957e-11	EDNRA/FLNA/PDPN/FERMT2/TGFBR3/ANXA6/TGFB1I1/ISL1/DACT3/FOXC1/EFNB1/FGFR1/TCF21/CORO1C/EPHA3/SFRP1/TGFBR2/ALDH1A2/PHLDB1/WWTR1/NRP2/SNAI2/SPRED1/BMP4/MEF2C/FGFR2/SPRY2/SPRY1/TGFB1/GATA3/LOXL2/TGFB3/TGFB2/BCL2/SFRP2/S100A4/EDNRB/EDN3/FN1/HPN/FRZB/HEYL/RGCC/FOXF2/COL1A1/EDN1/SEMA3C/IL6	48
GO:0003018	vascular process in circulatory system	50/1151	270/18903	1.31846e-12	1.04236e-10	6.69637e-11	EDNRA/ATP2B4/SLC24A3/CAV1/FERMT2/KCNJ8/KCNMB1/SLC8A1/ACTA2/VSTM4/ANGPT1/SLC16A2/FOXC1/ABCC9/KCNMA1/ITGA1/MMP2/PRKG1/LEPR/ATP1A2/ATP1B2/SLC2A4/PDE2A/ABCB1/P2RX1/TGFB1/ABCG2/ADRA1D/EDNRB/TRPV4/SLC29A1/EDN3/ABCC3/AKAP12/CLDN5/KLF2/LRP1/CEACAM1/PLVAP/SLC7A3/SLC2A3/SERPINF2/ADRA2C/SOD2/EDN1/SOD3/PTGS2/SLC15A2/SLC22A3/CD38	50
GO:0001822	kidney development	54/1151	309/18903	1.84609e-12	1.4178e-10	9.10831e-11	EDNRA/KANK2/FGF2/SERPINF1/KCNJ8/ACTA2/ANGPT1/RGN/FOXC1/GLIS2/TCF21/NID1/SULF2/RARB/SFRP1/ALDH1A2/PDGFD/WWTR1/EYA1/GFRA1/GLI3/BMP4/PDGFRB/AKR1B1/FBN1/HOXD11/AQP1/DCHS1/MEF2C/PDGFRA/ID3/FGFR2/SPRY1/ILK/PLXND1/PBX1/ITGA8/GATA3/CD34/SULF1/TGFB2/BCL2/ITGA3/PECAM1/EDNRB/GPC3/DLL1/HEYL/LAMB2/VANGL2/ADAMTS1/SDC1/EGR1/MME	54
GO:0036293	response to decreased oxygen levels	54/1151	309/18903	1.84609e-12	1.4178e-10	9.10831e-11	EDNRA/CAV1/KCNMB1/TGFBR3/SLC8A1/PTGIS/DDR2/MYOCD/MMP14/KCNMA1/MMP2/SFRP1/TGFBR2/CYGB/SLC2A4/CRYAB/PDLIM1/AQP1/EPAS1/AJUBA/PAM/ACVRL1/NDNF/ZFP36L1/CD34/CCN2/LOXL2/TGFB3/TGFB2/BCL2/CYBA/PLAU/SLC29A1/ATP1B1/CXCL12/VCAM1/ITGA2/CXCR4/RGCC/PENK/CYBB/THBS1/SOD2/EDN1/ITPR1/SOD3/PTGS2/DDIT4/ANG/AQP3/EGR1/KCNK3/FOS/CD38	54
GO:0090287	regulation of cellular response to growth factor stimulus	57/1151	338/18903	2.03757e-12	1.54281e-10	9.91144e-11	CAV2/ATP2B4/FGF2/CAV1/ADGRA2/EMILIN1/TGFBR3/CHRDL1/DKK3/TGFB1I1/MYOCD/FGFR1/ZNF423/ZEB1/SULF2/LTBP4/ITGA5/SFRP1/FST/LTBP1/CHST11/PRKCB/DCN/SPRED1/BMP4/FBN1/HTRA1/HHIP/ROBO1/NGFR/SPRY2/SPRY1/ACVRL1/ILK/ITGA8/TGFB1/GATA3/MMRN2/RBPMS2/SPART/TGFB3/SULF1/ITGA3/CHRDL2/SFRP2/KDR/CRIM1/HTRA3/GPC3/DLL1/JCAD/DKK1/THBS1/FERMT1/CCN1/NBL1/DLX1	57
GO:1903037	regulation of leukocyte cell-cell adhesion	61/1151	377/18903	2.14949e-12	1.58683e-10	1.01942e-10	CAV1/PRNP/EFNB1/PDE5A/VSIR/TGFBR2/SMARCD3/GLI3/LGALS1/BMP4/SIRPA/SELP/FGL2/HLA-DOA/CHST2/GATA3/LGALS3/IL27RA/HLA-E/RUNX1/HLA-DPB1/HLA-DPA1/CD74/IL6ST/ETS1/ANXA1/CXCL12/VCAM1/VTCN1/CCL21/HLA-DRA/AIF1/LRRC32/IL7R/CEBPB/CD3E/CCL5/LAPTM5/CD4/ITGB2/IGF2/HLA-DRB1/PYCARD/HLA-DQA1/PTPRC/CEACAM1/CORO1A/HLA-DQB2/HLA-DRB5/GPNMB/CCL2/IL2RG/CCL19/SELE/HLA-DQB1/HLA-A/IL6/SCGB1A1/HLA-DQA2/NR4A3/EGR3	61
GO:0070661	leukocyte proliferation	58/1151	348/18903	2.15474e-12	1.58683e-10	1.01942e-10	PRNP/IL33/EFNB1/PDE5A/VSIR/MSN/CD40/CX3CL1/CLU/CSF1/GSTP1/TGFBR2/INPP5D/CNN2/BMP4/ELF4/MEF2C/IL34/CSF1R/TNFRSF1B/RASSF5/KIT/LGALS3/IL27RA/HLA-E/BCL2/HLA-DPB1/TLR4/HLA-DPA1/CD74/IL6ST/AHR/ANXA1/VCAM1/GPR183/VTCN1/AIF1/TNFAIP3/LRRC32/IL7R/CEBPB/CD3E/CCL5/IGF2/HLA-DRB1/RAC2/PYCARD/BST2/PTPRC/CORO1A/TYROBP/GPNMB/CCL19/HLA-A/IL6/SCGB1A1/JUNB/CD38	58
GO:0048771	tissue remodeling	39/1151	179/18903	2.18605e-12	1.58814e-10	1.02026e-10	EDNRA/GJA1/CAV1/AXL/FLNA/DDR2/MITF/MMP14/FOXC1/MMP2/CSPG4/LEPR/SFRP1/RSPO3/INPP5D/MEF2C/CTSK/EPAS1/CSF1R/ACVRL1/TGFB1/S1PR1/TIMP1/EPHA2/LTBP3/TGFB3/RUNX1/TMEM119/PDK4/IGFBP5/PRKCA/TNFAIP3/PTN/CEACAM1/GPNMB/SEMA3C/IL6/ACP5/CD38	39
GO:0030336	negative regulation of cell migration	60/1151	368/18903	2.34475e-12	1.68072e-10	1.07974e-10	ATP2B4/FGF2/GJA1/SERPINF1/DPYSL3/EMILIN1/BMERB1/MYOCD/MITF/IL33/VCL/TPM1/CX3CL1/PODN/CORO1C/PRKG1/SFRP1/MCC/ATP1B2/CYGB/CLIC4/CNN2/DCN/SPRED1/MEF2C/ROBO1/CD200/NGFR/ACVRL1/TGFB1/MMRN2/IL27RA/TIMP1/KANK1/SULF1/BCL2/RHOB/SFRP2/CD74/IGFBP5/GADD45A/COL3A1/CXCL12/RRAS/CCL21/AIF1/CLDN5/RGCC/LRP1/IFITM1/IGFBP3/BST2/THBS1/CCL2/NBL1/DUSP1/PTPRT/SERPINE1/CYP1B1/ALOX15B	60
GO:0002687	positive regulation of leukocyte migration	35/1151	148/18903	2.4251e-12	1.71544e-10	1.10204e-10	MMP14/JAM2/CX3CL1/CSF1/ANO6/GAS6/PDGFD/RARRES2/IL34/JAM3/CSF1R/SELP/LGALS3/CD74/GPSM3/S100A14/TRPV4/EDN3/PIK3R1/CXCL12/CCL21/AIF1/ITGA2/CCL5/RAC2/PYCARD/PTN/CORO1A/THBS1/CXCL17/PLVAP/EDN1/CCL19/IL6/SERPINE1	35
GO:0061138	morphogenesis of a branching epithelium	40/1151	188/18903	2.55253e-12	1.78213e-10	1.14489e-10	EDNRA/FGF2/FOXF1/MMP14/TCF21/CSF1/HOXD13/SFRP1/TGFBR2/NFATC4/MET/EYA1/CLIC4/RSPO3/GLI3/SNAI2/BMP4/HHIP/HOXD11/DCHS1/FGFR2/SPRY2/SPRY1/TP63/ILK/FGF7/PLXND1/PBX1/COL4A1/EPHA2/NTN4/SULF1/BCL2/SFRP2/KDR/GPC3/SOCS3/EDN1/SEMA3C/TGM2	40
GO:1901654	response to ketone	42/1151	205/18903	2.7228e-12	1.87664e-10	1.2056e-10	CAV1/ADCY5/SERPINF1/TGFBR3/PTGER2/MSN/SRD5A2/HOXD13/GAS6/SFRP1/ADCY3/GNG2/EFNA5/IGFBP7/AQP1/TGFB1/A2M/FBXO32/TGFB3/FIBIN/TGFB2/CYBA/NR3C1/SCNN1A/AHR/MAOB/CCL21/CFTR/KLF2/CYBB/THBS1/POSTN/CLDN1/EDN1/CCL19/DDIT4/SGK1/SCNN1G/FOS/CYP1B1/CD38/FOSB	42
GO:0048661	positive regulation of smooth muscle cell proliferation	28/1151	98/18903	2.80083e-12	1.90265e-10	1.22231e-10	FGF2/GJA1/DDR2/MMP2/CX3CL1/TGFBR2/PDGFD/BMP4/PDGFRB/FGFR2/TGFB1/S1PR1/RBPMS2/CYBA/TLR4/IGFBP5/AIF1/ITGA2/CALCRL/CCL5/THBS1/ADAMTS1/SERPINF2/EDN1/ID2/PTGS2/IL6/NR4A3	28
GO:0040013	negative regulation of locomotion	65/1151	419/18903	2.83133e-12	1.90265e-10	1.22231e-10	ATP2B4/FGF2/GJA1/SERPINF1/DPYSL3/EMILIN1/BMERB1/MYOCD/MITF/RGN/IL33/VCL/TPM1/FBLN1/CX3CL1/PODN/CORO1C/PRKG1/SPOCK3/SFRP1/MCC/ATP1B2/CYGB/CLIC4/CNN2/DCN/SPRED1/MEF2C/ROBO1/CD200/NGFR/ACVRL1/TGFB1/GATA3/MMRN2/IL27RA/TIMP1/KANK1/SULF1/BCL2/RHOB/SFRP2/CD74/IGFBP5/GADD45A/COL3A1/CXCL12/RRAS/CCL21/AIF1/CLDN5/RGCC/LRP1/IFITM1/IGFBP3/BST2/THBS1/CCL2/NBL1/DUSP1/PTPRT/SEMA3C/SERPINE1/CYP1B1/ALOX15B	65
GO:0071706	tumor necrosis factor superfamily cytokine production	40/1151	189/18903	3.05157e-12	2.00064e-10	1.28527e-10	AXL/ANGPT1/ISL1/SYT11/IL33/VSIR/CX3CL1/CLU/GAS6/GSTP1/NFATC4/ARHGEF2/SIRPA/TLR3/IL27RA/CD34/HLA-E/CYBA/TLR4/PIK3R1/CD14/ARID5A/AKAP12/TNFAIP3/PYCARD/PTPRC/CYBB/THBS1/CD2/TYROBP/LTF/GPNMB/CCL19/HSPB1/IL6/ZFP36/ACP5/ORM2/SPON2/ORM1	40
GO:1903555	regulation of tumor necrosis factor superfamily cytokine production	40/1151	189/18903	3.05157e-12	2.00064e-10	1.28527e-10	AXL/ANGPT1/ISL1/SYT11/IL33/VSIR/CX3CL1/CLU/GAS6/GSTP1/NFATC4/ARHGEF2/SIRPA/TLR3/IL27RA/CD34/HLA-E/CYBA/TLR4/PIK3R1/CD14/ARID5A/AKAP12/TNFAIP3/PYCARD/PTPRC/CYBB/THBS1/CD2/TYROBP/LTF/GPNMB/CCL19/HSPB1/IL6/ZFP36/ACP5/ORM2/SPON2/ORM1	40
GO:0007178	transmembrane receptor protein serine/threonine kinase signaling pathway	62/1151	390/18903	3.10453e-12	2.01084e-10	1.29182e-10	CAV2/CAV1/RBPMS/FERMT2/EMILIN1/TGFBR3/CHRDL1/DKK3/TGFB1I1/MYOCD/ZNF423/ZEB1/LTBP4/SFRP1/TGFBR2/WWTR1/FST/LTBP1/CHST11/VIM/SPRED1/BMP4/FBN1/HTRA1/ZYX/SPRY2/SPRY1/LTBP2/ACVRL1/ILK/ITGA8/TGFB1/RBPMS2/SPART/ITGB6/LTBP3/TGFB3/SULF1/TGFB2/COL1A2/ITGA3/CHRDL2/SFRP2/ITGB8/KDR/CRIM1/ID1/COL3A1/ATOH8/HTRA3/GPC3/LRRC32/CLDN5/LRP1/DKK1/THBS1/FERMT1/CCN1/NBL1/EGR1/FOS/DLX1	62
GO:0060249	anatomical structure homeostasis	56/1151	333/18903	3.5841e-12	2.29383e-10	1.47361e-10	GJA1/CAV1/VSTM4/ANGPT1/JAM2/FOXC1/VCL/PLN/CFL2/HAAO/CX3CL1/CSF1/MAP1A/ATP1B2/WWTR1/LDB2/INPP5D/CYTL1/CTSK/EPAS1/JAM3/CSF1R/DMD/LAMA2/P2RX1/CD34/CCN2/S1PR1/ITGB6/LTBP3/BCL2/TMEM119/PDK4/TLR4/PECAM1/KDR/PRKCA/COL3A1/CDH3/TNFAIP3/CLDN5/CORO1A/RCN3/RAC3/LTF/CLDN1/JCHAIN/PTGS2/HSPB1/LYZ/IL6/ALDH1A1/ACP5/CD38/PIGR/AZGP1	56
GO:0007596	blood coagulation	44/1151	225/18903	4.38507e-12	2.77343e-10	1.78172e-10	CAV1/AXL/FLNA/PDPN/EMILIN1/SERPING1/VCL/FBLN1/CD40/C1QTNF1/PRKG1/ANO6/CSRP1/GAS6/MYL9/TLN1/PDGFRA/F10/SELP/P2RX1/ILK/ANXA2/CD34/PLA2G4A/TLR4/PLAU/IL6ST/PRKCA/COL3A1/FN1/THBD/PROCR/ITGA2/PLSCR1/CEACAM1/THBS1/F13A1/SERPINF2/ADRA2C/EDN1/HSPB1/IL6/SERPINE1/SAA1	44
GO:0032956	regulation of actin cytoskeleton organization	59/1151	365/18903	5.18293e-12	3.23993e-10	2.08142e-10	FLNA/FERMT2/LMOD1/SYNPO2/LPAR1/KIRREL1/SYNPO/GSN/CDC42EP3/SVIL/TPM1/RND3/DAAM2/CFL2/CX3CL1/RND2/EPHA3/SFRP1/GPM6B/MET/EFNA5/FHOD3/FAM107A/FCHSD2/PDGFRB/MYADM/PDGFRA/JAM3/CSF1R/CDC42EP4/PAM/TMOD1/ELN/CCN2/S1PR1/CAPG/TGFB3/KANK1/DIXDC1/RHOB/ID1/HCLS1/PIK3R1/CXCL12/CCL21/RGCC/LRP1/RAC2/PYCARD/BST2/GMFG/CORO1A/RAC3/MYOC/RHPN1/SERPINF2/EDN1/TMSB15A/CDC42EP5	59
GO:0007162	negative regulation of cell adhesion	53/1151	308/18903	5.50614e-12	3.40242e-10	2.1858e-10	FZD7/PRNP/ANGPT1/MMP14/PDE5A/VSIR/FBLN1/MMP2/CX3CL1/C1QTNF1/CORO1C/PRKG1/ADAM22/EFNA5/FAM107A/GLI3/SNAI2/BMP4/MYADM/TGFBI/JAM3/FGL2/ACVRL1/PLXND1/TGFB1/GBP1/LGALS3/KANK1/RUNX1/CD74/FXYD5/TRPV4/ANXA1/PIK3R1/CXCL12/VTCN1/CCL21/LRRC32/CEBPB/RGCC/LAPTM5/HLA-DRB1/PTPRC/CEACAM1/THBS1/MYOC/GPNMB/DUSP1/COL1A1/CLDN7/SCGB1A1/SERPINE1/CYP1B1	53
GO:0150115	cell-substrate junction organization	28/1151	101/18903	6.2869e-12	3.84072e-10	2.46738e-10	FERMT2/SORBS1/MMP14/VCL/ACTN1/CORO1C/ITGA5/EPHA3/SFRP1/GPM6B/COL16A1/EFNA5/DST/FAM107A/ITGB4/TLN1/AJUBA/MAPRE2/ACVRL1/TRIP6/COL17A1/BCL2/KDR/PIK3R1/FN1/ITGA2/THBS1/MYOC	28
GO:0052547	regulation of peptidase activity	68/1151	459/18903	7.69751e-12	4.64964e-10	2.98705e-10	CAV1/SERPINF1/ITIH5/PRNP/TIMP2/SERPING1/GSN/VSIR/FBLN1/IFI16/COL6A3/GAS6/WFDC1/SPOCK3/SERPINB1/PAPLN/CTSB/CRYAB/NLRP1/PCOLCE/AQP1/SERPINB9/CASP1/ECM1/ROBO1/TIMP3/RARRES1/ANTXR1/SOX7/NGFR/P2RX1/TP63/A2M/ANXA2/WFDC2/CCN2/TIMP1/SFRP2/C3/PCOLCE2/CRIM1/FN1/GPC3/SERPINB5/LRP1/LAPTM5/BIRC3/LXN/PYCARD/BST2/CPAMD8/CST7/PI16/THBS1/RCN3/CSTA/CCN1/LTF/COL7A1/SERPINF2/TIMP4/S100A9/PTGS2/SERPINE1/PI15/PI3/SERP…	68
GO:0003158	endothelium development	33/1151	139/18903	9.13826e-12	5.45859e-10	3.50674e-10	EDNRA/PDPN/VCL/MSN/ZEB1/MET/CLIC4/PDE2A/BMP4/MYADM/ACVRL1/COL18A1/SLC40A1/CD34/S1PR1/COL15A1/RHOB/GSTM3/S1PR3/PECAM1/KDR/EDNRB/ID1/HEG1/ATOH8/DLL1/CXCR4/CLDN5/APOLD1/CEACAM1/ARHGEF26/CLDN1/FASN	33
GO:0050817	coagulation	44/1151	230/18903	9.52665e-12	5.47778e-10	3.51907e-10	CAV1/AXL/FLNA/PDPN/EMILIN1/SERPING1/VCL/FBLN1/CD40/C1QTNF1/PRKG1/ANO6/CSRP1/GAS6/MYL9/TLN1/PDGFRA/F10/SELP/P2RX1/ILK/ANXA2/CD34/PLA2G4A/TLR4/PLAU/IL6ST/PRKCA/COL3A1/FN1/THBD/PROCR/ITGA2/PLSCR1/CEACAM1/THBS1/F13A1/SERPINF2/ADRA2C/EDN1/HSPB1/IL6/SERPINE1/SAA1	44
GO:0050920	regulation of chemotaxis	44/1151	230/18903	9.52665e-12	5.47778e-10	3.51907e-10	FGF2/ADGRA2/LPAR1/FGFR1/CSF1/ANO6/GAS6/MET/PDGFD/RARRES2/PDGFRB/PDGFRA/IL34/ROBO1/JAM3/CSF1R/TGFB1/S1PR1/CD74/KDR/GPSM3/S100A14/TRPV4/EDN3/CXCL12/GPR183/CCL21/AIF1/ITGA2/CXCR4/CCL5/RAC2/PTN/THBS1/CXCL17/CCL2/NBL1/DUSP1/EDN1/CCL19/SEMA3C/HSPB1/IL6/SERPINE1	44
GO:0001894	tissue homeostasis	49/1151	275/18903	9.57796e-12	5.47778e-10	3.51907e-10	GJA1/VSTM4/ANGPT1/JAM2/FOXC1/VCL/CSF1/ATP1B2/WWTR1/LDB2/INPP5D/CYTL1/CTSK/EPAS1/JAM3/CSF1R/DMD/LAMA2/CD34/CCN2/S1PR1/ITGB6/LTBP3/BCL2/TMEM119/PDK4/TLR4/PECAM1/KDR/PRKCA/COL3A1/CDH3/TNFAIP3/CLDN5/CORO1A/RCN3/RAC3/LTF/CLDN1/JCHAIN/PTGS2/HSPB1/LYZ/IL6/ALDH1A1/ACP5/CD38/PIGR/AZGP1	49
GO:1903039	positive regulation of leukocyte cell-cell adhesion	49/1151	275/18903	9.57796e-12	5.47778e-10	3.51907e-10	CAV1/EFNB1/VSIR/TGFBR2/SMARCD3/GLI3/LGALS1/SIRPA/SELP/HLA-DOA/CHST2/GATA3/IL27RA/HLA-E/RUNX1/HLA-DPB1/HLA-DPA1/CD74/IL6ST/ETS1/ANXA1/VCAM1/VTCN1/CCL21/HLA-DRA/AIF1/IL7R/CD3E/CCL5/CD4/ITGB2/IGF2/HLA-DRB1/PYCARD/HLA-DQA1/PTPRC/CORO1A/HLA-DQB2/HLA-DRB5/CCL2/IL2RG/CCL19/SELE/HLA-DQB1/HLA-A/IL6/HLA-DQA2/NR4A3/EGR3	49
GO:0022409	positive regulation of cell-cell adhesion	54/1151	322/18903	9.77463e-12	5.53141e-10	3.55353e-10	CAV1/PDPN/EFNB1/VSIR/CX3CL1/PLPP3/TGFBR2/SMARCD3/GLI3/ADAM19/LGALS1/SIRPA/SELP/HLA-DOA/CHST2/GATA3/IL27RA/HLA-E/RUNX1/HLA-DPB1/HLA-DPA1/CD74/IL6ST/ETS1/ANXA1/VCAM1/VTCN1/CCL21/HLA-DRA/AIF1/IL7R/CD3E/CCL5/CD4/ITGB2/IGF2/HLA-DRB1/PYCARD/HLA-DQA1/PTPRC/CORO1A/HLA-DQB2/HLA-DRB5/SERPINF2/CCL2/IL2RG/CCL19/SELE/HLA-DQB1/HLA-A/IL6/HLA-DQA2/NR4A3/EGR3	54
GO:0071604	transforming growth factor beta production	18/1151	42/18903	1.01603e-11	5.68976e-10	3.65525e-10	CX3CL1/LTBP1/CD200/CD34/ITGB6/LUM/TGFB2/LAPTM4B/ITGB8/COL3A1/CDH3/FN1/LRRC32/THBS1/FERMT1/TYROBP/SERPINF2/PTGS2	18
GO:0007599	hemostasis	44/1151	231/18903	1.10913e-11	6.14709e-10	3.94905e-10	CAV1/AXL/FLNA/PDPN/EMILIN1/SERPING1/VCL/FBLN1/CD40/C1QTNF1/PRKG1/ANO6/CSRP1/GAS6/MYL9/TLN1/PDGFRA/F10/SELP/P2RX1/ILK/ANXA2/CD34/PLA2G4A/TLR4/PLAU/IL6ST/PRKCA/COL3A1/FN1/THBD/PROCR/ITGA2/PLSCR1/CEACAM1/THBS1/F13A1/SERPINF2/ADRA2C/EDN1/HSPB1/IL6/SERPINE1/SAA1	44
GO:1901214	regulation of neuron death	54/1151	325/18903	1.4141e-11	7.75736e-10	4.98353e-10	AXL/SERPINF1/PRNP/DDR2/ANGPT1/ISL1/NES/GRIK5/ITGA1/CX3CL1/CLU/CSF1/NFATC4/FAIM2/MEF2C/CD200/NDNF/PLXND1/UNC5B/GATA3/TNFRSF1B/IL27RA/CD34/TGFB3/TGFB2/BCL2/SNCG/TLR4/KDR/NR3C1/IL6ST/CNTFR/CEBPB/C1QA/CCL5/NCOA7/ITGB2/DKK1/CORO1A/FOXQ1/TYROBP/HLA-F/BTG2/GPNMB/CCL2/SOD2/DDIT4/EGR1/FOS/VSTM2L/NR4A3/DLX1/CHGA/NPY	54
GO:0031960	response to corticosteroid	36/1151	165/18903	1.46969e-11	7.98085e-10	5.12711e-10	SERPINF1/ISL1/FAM107A/IGFBP7/PTGDS/AQP1/PAM/ZFP36L1/A2M/FBXO32/CCN2/FIBIN/ZFP36L2/BCL2/CYBA/NR3C1/SCNN1A/ANXA1/MAOB/AIF1/CYBB/CLDN1/COL1A1/EDN1/ALPL/SDC1/PTGS2/DDIT4/SGK1/SCNN1G/IL6/SCGB1A1/FOS/ZFP36/CYP1B1/FOSB	36
GO:0050863	regulation of T cell activation	59/1151	376/18903	1.81662e-11	9.76617e-10	6.27405e-10	CAV1/PRNP/EFNB1/PDE5A/VSIR/ZEB1/TGFBR2/SMARCD3/GLI3/LGALS1/BMP4/SIRPA/FGL2/HLA-DOA/GATA3/TNFRSF1B/LGALS3/IL27RA/HLA-E/RUNX1/HLA-DPB1/HLA-DPA1/CD74/IL6ST/ANXA1/VCAM1/VTCN1/CCL21/HLA-DRA/AIF1/LRRC32/IL7R/CEBPB/CD3E/CCL5/LAPTM5/CD4/IGF2/HLA-DRB1/RAC2/PYCARD/HLA-DQA1/PTPRC/CEACAM1/CORO1A/CD2/HLA-DQB2/HLA-DRB5/GPNMB/CCL2/IL2RG/CCL19/HLA-DQB1/HLA-A/IL6/SCGB1A1/HLA-DQA2/EGR3/JUNB	59
GO:0043542	endothelial cell migration	49/1151	281/18903	2.14376e-11	1.14108e-09	7.33057e-10	ATP2B4/FGF2/ADGRA2/SERPINF1/VSTM4/ANGPT1/FGFR1/CD40/PLPP3/RHOJ/MET/NRP2/SNAI2/DCN/SPRED1/BMP4/MEF2C/ROBO1/ACVRL1/PLXND1/TGFB1/GATA3/MMRN2/LOXL2/EPHA2/RHOB/SPARC/KDR/ID1/ETS1/ANXA1/PRKCA/GADD45A/ATOH8/RRAS/CLEC14A/RGCC/JCAD/AMOT/PTN/CEACAM1/THBS1/EDN1/PTGS2/S100A2/HSPB1/S100P/CYP1B1/EGR3	49
GO:0010466	negative regulation of peptidase activity	47/1151	263/18903	2.2871e-11	1.20544e-09	7.74404e-10	SERPINF1/ITIH5/PRNP/TIMP2/SERPING1/IFI16/COL6A3/GAS6/WFDC1/SPOCK3/SERPINB1/PAPLN/CTSB/CRYAB/AQP1/SERPINB9/ECM1/TIMP3/RARRES1/A2M/ANXA2/WFDC2/TIMP1/SFRP2/C3/CRIM1/GPC3/SERPINB5/LRP1/BIRC3/LXN/BST2/CPAMD8/CST7/PI16/THBS1/CSTA/LTF/COL7A1/SERPINF2/TIMP4/PTGS2/SERPINE1/PI15/PI3/SERPINB11/CST1	47
GO:0051216	cartilage development	40/1151	201/18903	2.34064e-11	1.22168e-09	7.84837e-10	FGF2/OGN/ANXA6/PRRX1/EFEMP1/ZEB1/SULF2/RARB/TGFBR2/RARG/GLI3/CHST11/SNAI2/BMP4/MEF2C/ECM1/TGFBI/CYTL1/CTSK/ACVRL1/TGFB1/CCN2/LOXL2/TIMP1/LTBP3/SULF1/COL27A1/CHRDL2/SFRP2/RUNX1/ITGB8/MGP/TRPV4/COL3A1/ARID5A/FRZB/CCN1/BGN/COL1A1/EDN1	40
GO:0045446	endothelial cell differentiation	30/1151	121/18903	2.49423e-11	1.28932e-09	8.28295e-10	EDNRA/PDPN/VCL/MSN/ZEB1/MET/CLIC4/PDE2A/BMP4/MYADM/ACVRL1/COL18A1/S1PR1/COL15A1/GSTM3/S1PR3/PECAM1/KDR/EDNRB/ID1/HEG1/ATOH8/DLL1/CXCR4/CLDN5/APOLD1/CEACAM1/ARHGEF26/CLDN1/FASN	30
GO:0071634	regulation of transforming growth factor beta production	17/1151	39/18903	2.75199e-11	1.40902e-09	9.0519e-10	CX3CL1/LTBP1/CD200/CD34/ITGB6/LUM/TGFB2/LAPTM4B/ITGB8/CDH3/FN1/LRRC32/THBS1/FERMT1/TYROBP/SERPINF2/PTGS2	17
GO:0050878	regulation of body fluid levels	60/1151	390/18903	2.81475e-11	1.42755e-09	9.17098e-10	CAV1/AXL/FLNA/PDPN/EMILIN1/SERPING1/VCL/FBLN1/CD40/C1QTNF1/PRKG1/ANO6/CSRP1/GAS6/ANO1/MYL9/MET/TLN1/AKR1B1/AQP1/PDGFRA/F10/PAM/SELP/P2RX1/TP63/ILK/ANXA2/CD34/CYBA/PLA2G4A/TLR4/EDNRB/SCNN1A/PLAU/IL6ST/TRPV4/SLC29A1/PRKCA/COL3A1/HEG1/FN1/THBD/PROCR/ITGA2/CFTR/PLSCR1/CEACAM1/THBS1/F13A1/CLDN1/SERPINF2/ADRA2C/EDN1/HSPB1/AQP3/SCNN1G/IL6/SERPINE1/SAA1	60
GO:0001763	morphogenesis of a branching structure	40/1151	203/18903	3.22879e-11	1.62224e-09	1.04217e-09	EDNRA/FGF2/FOXF1/MMP14/TCF21/CSF1/HOXD13/SFRP1/TGFBR2/NFATC4/MET/EYA1/CLIC4/RSPO3/GLI3/SNAI2/BMP4/HHIP/HOXD11/DCHS1/FGFR2/SPRY2/SPRY1/TP63/ILK/FGF7/PLXND1/PBX1/COL4A1/EPHA2/NTN4/SULF1/BCL2/SFRP2/KDR/GPC3/SOCS3/EDN1/SEMA3C/TGM2	40
GO:0032964	collagen biosynthetic process	19/1151	50/18903	3.46984e-11	1.72721e-09	1.10961e-09	EMILIN1/DDR2/CYGB/VIM/BMP4/PDGFRB/PCOLCE/COL5A1/TGFB1/CCN2/TGFB3/P3H3/RUNX1/ITGA2/RGCC/RCN3/SERPINF2/COL1A1/IL6	19
GO:0007015	actin filament organization	66/1151	454/18903	3.6668e-11	1.80851e-09	1.16183e-09	FLNA/FERMT2/LMOD1/DPYSL3/SORBS1/SYNPO2/LPAR1/KIRREL1/SYNPO/GSN/CDC42EP3/SVIL/TPM1/RND3/DAAM2/CFL2/CX3CL1/CALD1/ACTN1/PLS3/GAS7/CORO1C/RND2/SFRP1/WIPF1/MET/FHOD3/ARHGEF2/FAM107A/PDLIM1/TPM2/FCHSD2/ZYX/MYADM/CDC42EP4/TMOD1/ELN/CCN2/S1PR1/CAPG/ACTC1/TGFB3/KANK1/BCL2/EFS/RHOB/TRPV4/ID1/HCLS1/PIK3R1/CXCL12/CCL21/AIF1/RGCC/RAC2/PYCARD/GMFG/CORO1A/RAC3/MYOC/RHPN1/SERPINF2/TMSB15A/ANG/CDC42EP5/ACTA1	66
GO:1903706	regulation of hemopoiesis	62/1151	413/18903	3.75518e-11	1.83526e-09	1.17902e-09	MEIS1/FAXDC2/AXL/MEIS2/MITF/MMP14/VSIR/ROR2/ZEB1/CSF1/GAS6/RAB7B/SFRP1/TGFBR2/RARG/SMARCD3/GLI3/INPP5D/SNAI2/BMP4/FBN1/MEF2C/IL34/FGL2/TLR3/HLA-DOA/TGFB1/ZFP36L1/GATA3/TMEM176A/TMEM176B/ZFP36L2/RUNX1/TLR4/CD74/ETS1/ANXA1/PRKCA/HCLS1/PIK3R1/EVI2B/HLA-DRA/DLL1/IL7R/CEBPB/CD4/C1QC/HLA-DRB1/PTN/PTPRC/CEACAM1/KLF10/CD2/TYROBP/LTF/IL2RG/CCL19/ID2/FOS/ZFP36/EGR3/JUNB	62
GO:0050678	regulation of epithelial cell proliferation	62/1151	414/18903	4.16277e-11	2.01613e-09	1.29522e-09	CAV2/FGF2/CAV1/FZD7/SERPINF1/TGFBR3/ISL1/RGN/FGFR1/ZEB1/LIMS2/SFRP1/ALDH1A2/MCC/EYA1/NRP2/SNAI2/BMP4/HTRA1/MEF2C/ECM1/ROBO1/FGFR2/NGFR/ACVRL1/TP63/FGF7/TGFB1/ZFP36L1/GATA3/MMRN2/SULF1/TGFB2/CYBA/SFRP2/SPARC/KDR/EDNRB/ID1/PRKCA/CXCL12/CDH3/ATOH8/PROK1/GPC3/HPN/TNFAIP3/SERPINB5/LAMB1/RGCC/JCAD/IGF2/PTN/CEACAM1/THBS1/CLDN1/KRT4/CCL2/ANG/ZFP36/NR4A3/EGR3	62
GO:0007044	cell-substrate junction assembly	26/1151	95/18903	4.88397e-11	2.3443e-09	1.50604e-09	FERMT2/SORBS1/MMP14/VCL/ACTN1/CORO1C/ITGA5/EPHA3/SFRP1/GPM6B/COL16A1/EFNA5/DST/FAM107A/ITGB4/TLN1/AJUBA/ACVRL1/TRIP6/COL17A1/BCL2/KDR/FN1/ITGA2/THBS1/MYOC	26
GO:0071674	mononuclear cell migration	40/1151	206/18903	5.18438e-11	2.46648e-09	1.58453e-09	ASB2/JAM2/MSN/CX3CL1/CSF1/ANO6/GAS6/PDGFD/RARRES2/SIRPA/IL34/ECM1/CSF1R/CD200/GATA3/LGALS3/IL27RA/S1PR1/PECAM1/S100A14/TRPV4/ANXA1/CH25H/CXCL12/GPR183/CCL21/AIF1/CXCR4/CCL5/PYCARD/CORO1A/THBS1/CXCL17/CCL2/NBL1/DUSP1/CCL19/IL6/SERPINE1/SAA1	40
GO:0048565	digestive tract development	31/1151	132/18903	5.23272e-11	2.46764e-09	1.58528e-09	CLMP/FOXF1/PDGFC/MYOCD/TCF21/HOXD13/RARB/DACT1/SFRP1/TGFBR2/ALDH1A2/GLI3/RARRES2/BMP4/DCHS1/PDGFRA/FGFR2/TP63/KIT/RBPMS2/TGFB3/TGFB2/BCL2/SFRP2/EDNRB/IL6ST/COL3A1/KLF5/FOXF2/ID2/NPY	31
GO:0032835	glomerulus development	22/1151	69/18903	5.58927e-11	2.61286e-09	1.67857e-09	EDNRA/ACTA2/ANGPT1/FOXC1/TCF21/NID1/SULF2/PDGFD/WWTR1/BMP4/PDGFRB/AQP1/MEF2C/PDGFRA/CD34/SULF1/BCL2/PECAM1/EDNRB/HEYL/LAMB2/EGR1	22
GO:0032944	regulation of mononuclear cell proliferation	44/1151	243/18903	6.37252e-11	2.95333e-09	1.8973e-09	PRNP/EFNB1/PDE5A/VSIR/CD40/CSF1/TGFBR2/INPP5D/BMP4/MEF2C/TNFRSF1B/RASSF5/LGALS3/IL27RA/HLA-E/BCL2/HLA-DPB1/TLR4/HLA-DPA1/CD74/IL6ST/AHR/ANXA1/VCAM1/GPR183/VTCN1/AIF1/LRRC32/CEBPB/CD3E/CCL5/IGF2/HLA-DRB1/RAC2/PYCARD/PTPRC/CORO1A/TYROBP/GPNMB/CCL19/HLA-A/IL6/SCGB1A1/CD38	44
GO:0070997	neuron death	57/1151	368/18903	6.7648e-11	3.10834e-09	1.99688e-09	AXL/SERPINF1/PRNP/DDR2/ANGPT1/ISL1/NES/GRIK5/ITGA1/CX3CL1/CLU/CSF1/NFATC4/FAIM2/NLRP1/MEF2C/CD200/NGFR/TP63/NDNF/PLXND1/UNC5B/GATA3/TNFRSF1B/IL27RA/CD34/TGFB3/TGFB2/BCL2/SNCG/TLR4/KDR/NR3C1/IL6ST/CNTFR/CEBPB/C1QA/CCL5/NCOA7/ITGB2/DKK1/CORO1A/FOXQ1/TYROBP/HLA-F/BTG2/GPNMB/CCL2/SOD2/DDIT4/EGR1/FOS/VSTM2L/NR4A3/DLX1/CHGA/NPY	57
GO:0055123	digestive system development	32/1151	143/18903	9.88166e-11	4.50202e-09	2.89222e-09	CLMP/FOXF1/PDGFC/MYOCD/TCF21/HOXD13/RARB/DACT1/SFRP1/TGFBR2/ALDH1A2/GLI3/RARRES2/BMP4/DCHS1/PDGFRA/FGFR2/TP63/KIT/RBPMS2/TGFB3/TGFB2/BCL2/SFRP2/EDNRB/IL6ST/COL3A1/KLF5/FOXF2/IGF2/ID2/NPY	32
GO:0072006	nephron development	33/1151	152/18903	1.18806e-10	5.36724e-09	3.44806e-09	EDNRA/FGF2/ACTA2/ANGPT1/FOXC1/TCF21/NID1/SULF2/PDGFD/WWTR1/EYA1/GLI3/BMP4/PDGFRB/HOXD11/AQP1/DCHS1/MEF2C/PDGFRA/ILK/PBX1/GATA3/CD34/SULF1/BCL2/ITGA3/PECAM1/EDNRB/GPC3/DLL1/HEYL/LAMB2/EGR1	33
GO:0050670	regulation of lymphocyte proliferation	43/1151	239/18903	1.29873e-10	5.81474e-09	3.73554e-09	PRNP/EFNB1/PDE5A/VSIR/CD40/TGFBR2/INPP5D/BMP4/MEF2C/TNFRSF1B/RASSF5/LGALS3/IL27RA/HLA-E/BCL2/HLA-DPB1/TLR4/HLA-DPA1/CD74/IL6ST/AHR/ANXA1/VCAM1/GPR183/VTCN1/AIF1/LRRC32/CEBPB/CD3E/CCL5/IGF2/HLA-DRB1/RAC2/PYCARD/PTPRC/CORO1A/TYROBP/GPNMB/CCL19/HLA-A/IL6/SCGB1A1/CD38	43
GO:0001837	epithelial to mesenchymal transition	35/1151	169/18903	1.30875e-10	5.81474e-09	3.73554e-09	EDNRA/FLNA/PDPN/FERMT2/TGFBR3/TGFB1I1/ISL1/DACT3/FOXC1/FGFR1/EPHA3/SFRP1/TGFBR2/PHLDB1/WWTR1/SNAI2/SPRED1/BMP4/FGFR2/SPRY2/SPRY1/TGFB1/GATA3/LOXL2/TGFB3/TGFB2/SFRP2/S100A4/HPN/HEYL/RGCC/FOXF2/COL1A1/EDN1/IL6	35
GO:0031032	actomyosin structure organization	39/1151	204/18903	1.4669e-10	6.46396e-09	4.15262e-09	FERMT2/LMOD1/FRMD6/SORBS1/MYH11/PGM5/LPAR1/FLNC/TPM1/CFL2/CNN1/CSRP1/MYL9/SFRP1/EPB41L2/LDB3/MET/FHOD3/PDLIM1/CNN2/PDGFRB/ZYX/PDGFRA/TMOD1/ELN/CCN2/S1PR1/ACTC1/TGFB3/PIK3R1/RGCC/CNN3/MYOC/RHPN1/SERPINF2/EDN1/CASQ1/KRT19/ACTA1	39
GO:0002064	epithelial cell development	40/1151	213/18903	1.50362e-10	6.57191e-09	4.22197e-09	EDNRA/PALLD/FRMD6/ACTA2/VCL/MSN/RARB/MET/RARG/CLIC4/VIM/PDE2A/BMP4/AKR1B1/MYADM/EPAS1/TMOD1/TP63/COL18A1/EPHA2/COL15A1/GSTM3/S1PR3/PECAM1/KDR/EDNRB/IL6ST/HEG1/KLF5/DLL1/CXCR4/CLDN5/FRZB/FOSL2/LAMB2/TFCP2L1/ARHGEF26/CLDN1/SDC1/FASN	40
GO:0030099	myeloid cell differentiation	60/1151	407/18903	1.64311e-10	7.12369e-09	4.57645e-09	MEIS1/FAXDC2/TSPAN2/FLNA/MEIS2/TGFBR3/MITF/ROR2/ACTN1/CSF1/IFI16/RAB7B/SFRP1/TGFBR2/RARG/INPP5D/BMP4/SH3PXD2A/FBN1/MEF2C/IL34/EPAS1/CSF1R/TLR3/TGFB1/ZFP36L1/ANXA2/GATA3/KIT/EPHA2/ITGB6/RUNX1/TLR4/CD74/ITGB8/ETS1/PRKCA/HCLS1/PIK3R1/GPC3/GPR183/EVI2B/DLL1/CEBPB/KLF2/CD4/C1QC/HLA-DRB1/CEACAM1/KLF10/TYROBP/LTF/CCL19/ID2/UBD/FASN/FOS/ZFP36/JUNB/MT1G	60
GO:1902105	regulation of leukocyte differentiation	51/1151	317/18903	1.73313e-10	7.45383e-09	4.78854e-09	AXL/MITF/MMP14/VSIR/ROR2/ZEB1/CSF1/GAS6/SFRP1/TGFBR2/SMARCD3/GLI3/INPP5D/BMP4/FBN1/IL34/FGL2/TLR3/HLA-DOA/TGFB1/ZFP36L1/GATA3/TMEM176A/TMEM176B/ZFP36L2/RUNX1/TLR4/CD74/ANXA1/PRKCA/HCLS1/PIK3R1/EVI2B/HLA-DRA/IL7R/CEBPB/CD4/C1QC/HLA-DRB1/PTPRC/CEACAM1/KLF10/CD2/TYROBP/LTF/IL2RG/CCL19/ID2/FOS/EGR3/JUNB	51
GO:0070374	positive regulation of ERK1 and ERK2 cascade	41/1151	223/18903	1.75385e-10	7.48309e-09	4.80733e-09	FGF2/FERMT2/ACTA2/DDR2/PDGFC/ANGPT1/DENND2B/CX3CL1/GAS6/PDGFD/TNFAIP8L3/BMP4/PDGFRB/PDGFRA/FGFR2/CSF1R/SPRY2/TGFB1/CCN2/CAVIN3/TLR4/CD74/KDR/TRPV4/PRKCA/GPR183/CCL21/AKAP12/CCL5/CD4/HLA-DRB1/ACKR3/PYCARD/RAMP3/PTPRC/CXCL17/SERPINF2/GPNMB/CCL2/CCL19/NPY	41
GO:0002696	positive regulation of leukocyte activation	64/1151	450/18903	1.86208e-10	7.88231e-09	5.0638e-09	CAV1/AXL/MMP14/IL33/EFNB1/VSIR/CD40/GAS6/TGFBR2/SMARCD3/GLI3/INPP5D/LGALS1/SIRPA/MEF2C/HLA-DOA/TGFB1/GATA3/IL27RA/HLA-E/BCL2/RUNX1/HLA-DPB1/PLA2G4A/TLR4/HLA-DPA1/CD74/IL6ST/ANXA1/VCAM1/GPR183/VTCN1/CCL21/HLA-DRA/AIF1/IL7R/CD3E/CCL5/CD4/ITGB2/IGF2/HLA-DRB1/PYCARD/HLA-DQA1/PTPRC/CORO1A/THBS1/CD2/TYROBP/HLA-F/HLA-DQB2/HLA-DRB5/CCL2/IL2RG/CCL19/HLA-DQB1/HLA-A/IL6/HLA-DQA2/CD177/NR4A3/EGR3/IGLL5/CD38	64
GO:0009612	response to mechanical stimulus	39/1151	211/18903	4.14695e-10	1.74172e-08	1.11893e-08	FGF2/MEIS2/SLC8A1/DDR2/MMP14/GSN/IL33/CD40/MMP2/CSF1/ATP1A2/TGFBR2/CNN2/PDE2A/AQP1/MAP1B/CASP1/DMD/TLR3/KIT/CYBA/TLR4/SLITRK6/TRPV4/GADD45A/KRT5/CXCL12/HPN/ITGA2/CXCR4/PTN/THBS1/BTG2/COL1A1/EDN1/PTGS2/FOS/ACTA1/FOSB	39
GO:0048568	embryonic organ development	63/1151	449/18903	4.53449e-10	1.88972e-08	1.21401e-08	EDNRA/ASB2/PRRX1/FOXF1/PDGFC/NES/EFEMP1/MMP14/FOXC1/ZEB1/TCF21/RARB/TGFBR2/ALDH1A2/PLCD3/SOX15/RARG/EYA1/NTN1/RSPO3/GLI3/CHST11/RARRES2/BMP4/FBN1/HOXD10/MEF2C/PDGFRA/EPAS1/ID3/FGFR2/SPRY2/PBX1/ITGA8/TGFB1/MFAP2/ZFP36L1/A2M/GATA3/TEAD1/KIT/EPHA2/RBPMS2/TGFB3/TGFB2/HOXB2/KDR/SLITRK6/GJB5/HPN/DLL1/FRZB/CEBPB/HOXD9/SOCS3/FOXF2/IGF2/VANGL2/CCN1/EDN1/ID2/KRT19/JUNB	63
GO:0003007	heart morphogenesis	44/1151	258/18903	4.72507e-10	1.954e-08	1.2553e-08	EDNRA/FLNA/TGFBR3/ASB2/FOXF1/FHL2/ISL1/FOXC1/TPM1/TGFBR2/ALDH1A2/SMARCD3/EYA1/NRP2/SNAI2/BMP4/DCHS1/MEF2C/ROBO1/FGFR2/COL5A1/SPRY1/ACVRL1/ILK/PLXND1/TGFB1/GATA3/ELN/S1PR1/ACTC1/TGFB2/SFRP2/HEG1/DLL1/CLDN5/HEYL/DKK1/VANGL2/CCN1/ADAMTS1/FGFRL1/EDN1/SEMA3C/TNNC1	44
GO:0030199	collagen fibril organization	20/1151	64/18903	6.25072e-10	2.56518e-08	1.64794e-08	EFEMP2/EMILIN1/DDR2/FOXC1/COL14A1/AEBP1/COL5A1/ANXA2/LOXL1/LOXL2/LUM/DPT/TGFB2/COL1A2/SFRP2/COL3A1/SERPINF2/COL1A1/COL5A2/CYP1B1	20
GO:0050870	positive regulation of T cell activation	43/1151	251/18903	6.43552e-10	2.62101e-08	1.68381e-08	CAV1/EFNB1/VSIR/TGFBR2/SMARCD3/GLI3/LGALS1/SIRPA/HLA-DOA/GATA3/IL27RA/HLA-E/RUNX1/HLA-DPB1/HLA-DPA1/CD74/IL6ST/ANXA1/VCAM1/VTCN1/CCL21/HLA-DRA/AIF1/IL7R/CD3E/CCL5/CD4/IGF2/HLA-DRB1/PYCARD/HLA-DQA1/PTPRC/CORO1A/HLA-DQB2/HLA-DRB5/CCL2/IL2RG/CCL19/HLA-DQB1/HLA-A/IL6/HLA-DQA2/EGR3	43
GO:0061041	regulation of wound healing	30/1151	137/18903	6.62053e-10	2.66837e-08	1.71423e-08	FGF2/CAV1/MYLK/FERMT2/EMILIN1/ACTA2/DDR2/SERPING1/C1QTNF1/PRKG1/ANO6/WFDC1/PDGFRA/ANXA2/CD34/KANK1/DUOX1/PLAU/ANXA1/THBD/TNFAIP3/CXCR4/CEACAM1/THBS1/FERMT1/CLDN1/SERPINF2/EDN1/TNFRSF12A/SERPINE1	30
GO:0032496	response to lipopolysaccharide	52/1151	339/18903	6.65106e-10	2.66837e-08	1.71423e-08	AXL/KCNJ8/PLSCR4/PTGER2/CX3CL1/CSF1/GSTP1/VIM/SIRPA/MEF2C/CASP1/FGFR2/SELP/TGFB1/TNFRSF1B/LOXL1/TLR4/EDNRB/S100A14/PRKCA/DIO2/MAOB/THBD/VCAM1/CD14/ARID5A/AKAP12/TNFAIP3/CEBPB/CCL5/CXCL6/PYCARD/PENK/LTF/CLDN1/CCL2/TIMP4/SOD2/EDN1/ALPL/CXCL1/S100A9/SELE/PTGS2/CXCL2/IL6/SCGB1A1/FOS/ZFP36/SERPINE1/ACP5/SPON2	52
GO:0001706	endoderm formation	19/1151	58/18903	6.77594e-10	2.69833e-08	1.73348e-08	ITGA7/MMP14/COL6A1/MMP2/ITGA5/COL4A2/SOX7/COL5A1/LAMB3/FN1/LAMB1/DUSP5/ITGB2/DKK1/COL8A1/COL7A1/DUSP1/COL5A2/DUSP2	19
GO:0071621	granulocyte chemotaxis	29/1151	130/18903	8.01838e-10	3.16962e-08	2.03625e-08	ITGA9/ITGA1/CX3CL1/CSF1/RARRES2/IL34/JAM3/CSF1R/LGALS3/TGFB2/CD74/S100A14/TRPV4/EDN3/ANXA1/CCL21/CCL5/ITGB2/RAC2/CXCL6/THBS1/CXCL17/CCL2/EDN1/CXCL1/S100A9/CCL19/CXCL2/SAA1	29
GO:0016055	Wnt signaling pathway	63/1151	456/18903	8.54604e-10	3.35354e-08	2.1544e-08	PRICKLE2/EDNRA/RBMS3/FGF2/TCF7L1/CAV1/FZD7/ADGRA2/FERMT2/DKK3/TGFB1I1/ISL1/MITF/DACT3/DAAM2/GPRC5B/ROR2/IGFBP4/SULF2/DACT1/PLPP3/SFRP1/MCC/NFATC4/WWTR1/RARG/RSPO3/GLI3/SNAI2/FOXO1/MDFIC/FGFR2/NDRG2/SOX7/ILK/NDP/TGFB1/GATA3/AMOTL2/KANK1/SULF1/ITGA3/DIXDC1/SFRP2/LGR6/IGFBP6/EDNRB/PLEKHA4/CDH3/GPC3/TNFAIP3/FRZB/LRP1/DKK1/VANGL2/WIF1/FERMT1/RAC3/MYOC/COL1A1/EDN1/SDC1/EGR1	63
GO:0051346	negative regulation of hydrolase activity	55/1151	373/18903	9.50193e-10	3.70162e-08	2.37802e-08	SERPINF1/ITIH5/PRNP/TIMP2/RGN/SERPING1/IFI16/COL6A3/GAS6/WFDC1/SPOCK3/SERPINB1/LEPR/PAPLN/CTSB/CRYAB/AQP1/SERPINB9/ECM1/TIMP3/RARRES1/SPRY2/SPRY1/A2M/ANXA2/LGALS3/WFDC2/TIMP1/TGFB2/SFRP2/C3/CRIM1/ANXA1/GPC3/SERPINB5/LRP1/BIRC3/LXN/AMOT/BST2/CPAMD8/CST7/PI16/THBS1/CSTA/LTF/COL7A1/SERPINF2/TIMP4/PTGS2/SERPINE1/PI15/PI3/SERPINB11/CST1	55
GO:0198738	cell-cell signaling by wnt	63/1151	458/18903	1.02098e-09	3.94878e-08	2.5368e-08	PRICKLE2/EDNRA/RBMS3/FGF2/TCF7L1/CAV1/FZD7/ADGRA2/FERMT2/DKK3/TGFB1I1/ISL1/MITF/DACT3/DAAM2/GPRC5B/ROR2/IGFBP4/SULF2/DACT1/PLPP3/SFRP1/MCC/NFATC4/WWTR1/RARG/RSPO3/GLI3/SNAI2/FOXO1/MDFIC/FGFR2/NDRG2/SOX7/ILK/NDP/TGFB1/GATA3/AMOTL2/KANK1/SULF1/ITGA3/DIXDC1/SFRP2/LGR6/IGFBP6/EDNRB/PLEKHA4/CDH3/GPC3/TNFAIP3/FRZB/LRP1/DKK1/VANGL2/WIF1/FERMT1/RAC3/MYOC/COL1A1/EDN1/SDC1/EGR1	63
GO:0055001	muscle cell development	36/1151	191/18903	1.11742e-09	4.29088e-08	2.75658e-08	CAV2/EDNRA/EFEMP2/LMOD1/SLC8A1/ASB2/MYH11/PGM5/FLNC/FHL2/ISL1/TPM1/CFL2/ACTN1/CSRP1/MYL9/SGCB/LDB3/NFATC4/MYOF/FHOD3/CNTNAP1/BMP4/PDGFRB/DYSF/PDGFRA/DMD/TMOD1/ACTC1/BCL2/PI16/EDN1/CASQ1/SDC1/KRT19/ACTA1	36
GO:1905517	macrophage migration	19/1151	60/18903	1.30151e-09	4.96234e-08	3.18794e-08	EMILIN1/MMP14/ROR2/MMP2/CX3CL1/CSF1/CNN2/RARRES2/IL34/CSF1R/CD200/LGALS3/EDNRB/TRPV4/CCL5/THBS1/CXCL17/CCL2/SAA1	19
GO:0014706	striated muscle tissue development	43/1151	257/18903	1.36943e-09	5.18453e-08	3.33068e-08	EDNRA/FGF2/GJA1/FZD7/TGFBR3/SLC8A1/ASB2/MYH11/PGM5/MYOCD/FHL2/ISL1/JPH2/FOXC1/TPM1/PLN/RARB/GJC1/TGFBR2/ALDH1A2/SOX15/SGCB/EYA1/FHOD3/BMP4/PDGFRB/MEF2C/PDGFRA/FGFR2/TGFB1/S1PR1/ACTC1/TGFB2/RUNX1/HEG1/HOPX/DLL1/DKK1/PI16/EDN1/ID2/SEMA3C/TNNC1	43
GO:0048880	sensory system development	57/1151	398/18903	1.43292e-09	5.38696e-08	3.46073e-08	MEIS1/ATP2B4/FGF2/MEIS2/SERPINF1/CHRDL1/VSTM4/ISL1/MITF/NES/EFEMP1/SH3PXD2B/FOXC1/ZEB1/RARB/TGFBR2/ALDH1A2/RHOJ/CRYAB/RARG/SMARCD3/CLIC4/COL8A2/GLI3/SMOC1/VIM/SPRED1/BMP4/PDGFRB/FBN1/AQP1/PDGFRA/COL5A1/SPRY2/SPRY1/TMOD1/ACVRL1/PBX1/NDP/MFAP2/GATA3/COL4A1/EPHA2/TGFB2/BCL2/C3/KDR/SLITRK6/DLL1/C1QA/FOXF2/LAMB2/COL8A1/CPAMD8/COL5A2/DLX1/CYP1B1	57
GO:0070665	positive regulation of leukocyte proliferation	33/1151	167/18903	1.57022e-09	5.86216e-08	3.766e-08	EFNB1/CD40/CSF1/TGFBR2/MEF2C/IL34/CSF1R/KIT/IL27RA/HLA-E/BCL2/HLA-DPB1/TLR4/HLA-DPA1/CD74/IL6ST/ANXA1/VCAM1/GPR183/VTCN1/AIF1/CD3E/CCL5/IGF2/RAC2/PYCARD/BST2/PTPRC/CORO1A/CCL19/HLA-A/IL6/CD38	33
GO:0051251	positive regulation of lymphocyte activation	57/1151	400/18903	1.7317e-09	6.42044e-08	4.12466e-08	CAV1/AXL/MMP14/EFNB1/VSIR/CD40/GAS6/TGFBR2/SMARCD3/GLI3/INPP5D/LGALS1/SIRPA/MEF2C/HLA-DOA/TGFB1/GATA3/IL27RA/HLA-E/BCL2/RUNX1/HLA-DPB1/TLR4/HLA-DPA1/CD74/IL6ST/ANXA1/VCAM1/GPR183/VTCN1/CCL21/HLA-DRA/AIF1/IL7R/CD3E/CCL5/CD4/IGF2/HLA-DRB1/PYCARD/HLA-DQA1/PTPRC/CORO1A/TYROBP/HLA-F/HLA-DQB2/HLA-DRB5/CCL2/IL2RG/CCL19/HLA-DQB1/HLA-A/IL6/HLA-DQA2/EGR3/IGLL5/CD38	57
GO:0002237	response to molecule of bacterial origin	53/1151	360/18903	2.03282e-09	7.48524e-08	4.80871e-08	AXL/KCNJ8/PLSCR4/PTGER2/CX3CL1/CSF1/GSTP1/VIM/SIRPA/MEF2C/SSC5D/CASP1/FGFR2/SELP/TGFB1/TNFRSF1B/LOXL1/TLR4/EDNRB/S100A14/PRKCA/DIO2/MAOB/THBD/VCAM1/CD14/ARID5A/AKAP12/TNFAIP3/CEBPB/CCL5/CXCL6/PYCARD/PENK/LTF/CLDN1/CCL2/TIMP4/SOD2/EDN1/ALPL/CXCL1/S100A9/SELE/PTGS2/CXCL2/IL6/SCGB1A1/FOS/ZFP36/SERPINE1/ACP5/SPON2	53
GO:0007568	aging	33/1151	169/18903	2.15756e-09	7.8879e-08	5.0674e-08	EDNRA/FGF2/SERPINF1/KCNMB1/RGN/SERPING1/MMP2/CX3CL1/TGFBR2/COL4A2/CRYAB/GFRA1/PDGFRB/TP63/TNFRSF1B/CCN2/LOXL2/TIMP1/TGFB3/EDNRB/IGFBP5/VCAM1/C1QA/PENK/CLDN1/KRT14/SOD2/EDN1/ALPL/PTGS2/FOS/MME/NPY	33
GO:0090092	regulation of transmembrane receptor protein serine/threonine kinase signaling pathway	46/1151	290/18903	2.17152e-09	7.8879e-08	5.0674e-08	CAV2/CAV1/RBPMS/EMILIN1/TGFBR3/CHRDL1/DKK3/TGFB1I1/MYOCD/ZNF423/ZEB1/LTBP4/SFRP1/TGFBR2/FST/LTBP1/CHST11/SPRED1/BMP4/FBN1/HTRA1/SPRY2/SPRY1/ACVRL1/ILK/ITGA8/TGFB1/RBPMS2/SPART/TGFB3/SULF1/TGFB2/ITGA3/CHRDL2/SFRP2/KDR/CRIM1/HTRA3/GPC3/LRP1/DKK1/THBS1/FERMT1/CCN1/NBL1/DLX1	46
GO:0150063	visual system development	56/1151	392/18903	2.1943e-09	7.91714e-08	5.08618e-08	MEIS1/ATP2B4/FGF2/MEIS2/SERPINF1/CHRDL1/VSTM4/MITF/NES/EFEMP1/SH3PXD2B/FOXC1/ZEB1/RARB/TGFBR2/ALDH1A2/RHOJ/CRYAB/RARG/SMARCD3/CLIC4/COL8A2/GLI3/SMOC1/VIM/SPRED1/BMP4/PDGFRB/FBN1/AQP1/PDGFRA/COL5A1/SPRY2/SPRY1/TMOD1/ACVRL1/PBX1/NDP/MFAP2/GATA3/COL4A1/EPHA2/TGFB2/BCL2/C3/KDR/SLITRK6/DLL1/C1QA/FOXF2/LAMB2/COL8A1/CPAMD8/COL5A2/DLX1/CYP1B1	56
GO:0010632	regulation of epithelial cell migration	46/1151	292/18903	2.71946e-09	9.74654e-08	6.26143e-08	ATP2B4/FGF2/ADGRA2/SERPINF1/ANGPT1/FGFR1/CD40/CORO1C/PLPP3/TGFBR2/RHOJ/MCC/MET/NRP2/DCN/SPRED1/BMP4/MEF2C/MAPRE2/ACVRL1/FGF7/TGFB1/GATA3/MMRN2/EPHA2/TGFB2/ITGA3/RHOB/SPARC/KDR/ETS1/ANXA1/PRKCA/GADD45A/ATOH8/RRAS/ENPP2/ITGA2/RGCC/JCAD/PTN/CEACAM1/THBS1/EDN1/PTGS2/HSPB1	46
GO:0032760	positive regulation of tumor necrosis factor production	25/1151	105/18903	2.80109e-09	9.97262e-08	6.40668e-08	ISL1/IL33/CLU/NFATC4/ARHGEF2/TLR3/HLA-E/CYBA/TLR4/PIK3R1/CD14/ARID5A/AKAP12/PYCARD/PTPRC/CYBB/THBS1/CD2/TYROBP/CCL19/HSPB1/IL6/ORM2/SPON2/ORM1	25
GO:0007179	transforming growth factor beta receptor signaling pathway	38/1151	216/18903	2.95414e-09	1.04291e-07	6.69992e-08	CAV2/CAV1/FERMT2/EMILIN1/TGFBR3/DKK3/TGFB1I1/MYOCD/ZEB1/LTBP4/TGFBR2/LTBP1/CHST11/SPRED1/FBN1/HTRA1/ZYX/SPRY2/SPRY1/LTBP2/ACVRL1/ITGA8/TGFB1/ITGB6/LTBP3/TGFB3/TGFB2/COL1A2/ITGA3/ITGB8/ID1/COL3A1/HTRA3/LRRC32/CLDN5/THBS1/FERMT1/FOS	38
GO:0006939	smooth muscle contraction	26/1151	113/18903	2.9681e-09	1.04291e-07	6.69992e-08	EDNRA/ATP2B4/CAV1/MYLK/SLC8A1/MYH11/ACTA2/MYOCD/KCNMA1/PRKG1/CNN1/SULF2/ATP1A2/SMTN/P2RX1/KIT/APBB1/SULF1/EDNRB/EDN3/ITGA2/CALCRL/ADRA2C/EDN1/PTGS2/CD38	26
GO:0034612	response to tumor necrosis factor	42/1151	254/18903	3.05973e-09	1.06812e-07	6.8619e-08	CD40/CX3CL1/GBP2/GAS6/GSTP1/SFRP1/SLC2A4/ARHGEF2/CASP1/CTSK/ILK/ZFP36L1/GBP1/CCDC3/GATA3/TNFRSF1B/ZFP36L2/CYBA/VCAM1/CD14/CCL21/AKAP12/PID1/TNFAIP3/KLF2/CCL5/LAPTM5/BIRC3/PYCARD/THBS1/PLVAP/CLDN1/CCL2/COL1A1/EDN1/CCL19/SELE/UBD/PTGS2/FOS/ZFP36/CYP1B1	42
GO:0002761	regulation of myeloid leukocyte differentiation	27/1151	122/18903	3.67719e-09	1.27539e-07	8.19345e-08	MITF/ROR2/CSF1/SFRP1/INPP5D/FBN1/IL34/TLR3/TGFB1/ZFP36L1/RUNX1/TLR4/CD74/PRKCA/HCLS1/PIK3R1/EVI2B/CEBPB/CD4/C1QC/HLA-DRB1/CEACAM1/KLF10/TYROBP/LTF/ID2/FOS	27
GO:0001649	osteoblast differentiation	41/1151	246/18903	3.71112e-09	1.27891e-07	8.21606e-08	FGF2/FERMT2/DDR2/MRC2/FHL2/COL6A1/TWIST2/PDLIM7/SFRP1/WWTR1/TNC/GLI3/SNAI2/SMOC1/BMP4/MEF2C/ID3/FGFR2/ID4/TP63/ILK/EPHA2/SFRP2/TMEM119/CRIM1/IL6ST/IGFBP5/CEBPB/IGF2/IFITM1/IGFBP3/PENK/CCN1/MYOC/LTF/COL1A1/ALPL/CEBPD/FASN/IL6/JUNB	41
GO:0002399	MHC class II protein complex assembly	10/1151	16/18903	3.85482e-09	1.30791e-07	8.40233e-08	HLA-DOA/HLA-DPB1/HLA-DPA1/HLA-DRA/HLA-DRB1/HLA-DQA1/HLA-DQB2/HLA-DRB5/HLA-DQB1/HLA-DQA2	10
GO:0002503	peptide antigen assembly with MHC class II protein complex	10/1151	16/18903	3.85482e-09	1.30791e-07	8.40233e-08	HLA-DOA/HLA-DPB1/HLA-DPA1/HLA-DRA/HLA-DRB1/HLA-DQA1/HLA-DQB2/HLA-DRB5/HLA-DQB1/HLA-DQA2	10
GO:0010712	regulation of collagen metabolic process	16/1151	45/18903	3.883e-09	1.30791e-07	8.40233e-08	EMILIN1/DDR2/VSIR/CYGB/VIM/BMP4/PDGFRB/MFAP4/TGFB1/CCN2/TGFB3/RUNX1/ITGA2/RGCC/SERPINF2/IL6	16
GO:0090257	regulation of muscle system process	42/1151	256/18903	3.89258e-09	1.30791e-07	8.40233e-08	ATP2B4/CAV1/PPP1R12B/SLC8A1/ANXA6/MYOCD/PDE5A/TPM1/PLN/KCNMA1/PRKG1/CNN1/MYL9/ATP1A2/SGCA/LMCD1/FOXO1/DMD/P2RX1/GSTM2/TNFRSF1B/FBXO32/KIT/CCN2/CASQ2/IL6ST/TRPV4/IGFBP5/PRKCA/ATP1B1/DMPK/AIF1/ITGA2/CALCRL/PI16/ADRA2C/EDN1/CASQ1/PTGS2/NR4A3/TNNC1/CHGA	42
GO:0002274	myeloid leukocyte activation	40/1151	237/18903	3.95968e-09	1.32219e-07	8.49409e-08	FOXF1/SYT11/IL33/CX3CL1/CLU/CSF1/TGFBR2/PTGDS/DYSF/CD200/TLR3/KIT/ITGB6/CD93/PLA2G4A/TLR4/CD74/ITGB8/ANXA1/FN1/AIF1/C1QA/CCL5/ITGB2/PLSCR1/RAC2/CXCL6/PYCARD/CST7/PTPRC/THBS1/CD2/TYROBP/UBD/IL6/CD177/NR4A3/MT1G/CHGA/NPY	40
GO:0010717	regulation of epithelial to mesenchymal transition	25/1151	107/18903	4.25269e-09	1.41126e-07	9.06632e-08	PDPN/FERMT2/TGFB1I1/ISL1/DACT3/FOXC1/EPHA3/SFRP1/TGFBR2/PHLDB1/WWTR1/SPRED1/BMP4/SPRY2/SPRY1/TGFB1/GATA3/LOXL2/TGFB3/TGFB2/SFRP2/HPN/RGCC/COL1A1/IL6	25
GO:0030282	bone mineralization	27/1151	123/18903	4.44203e-09	1.45612e-07	9.35449e-08	SLC24A3/SLC8A1/DDR2/ROR2/ANO6/GPM6B/BMP4/MEF2C/ECM1/SRGN/FGFR2/TGFB1/S1PR1/LTBP3/TGFB3/COL1A2/TMEM119/OMD/MGP/GPC3/CLEC3B/PTN/KLF10/CCN1/LTF/ALPL/PTGS2	27
GO:0071675	regulation of mononuclear cell migration	27/1151	123/18903	4.44203e-09	1.45612e-07	9.35449e-08	JAM2/MSN/CSF1/ANO6/GAS6/PDGFD/RARRES2/IL34/ECM1/CSF1R/CD200/LGALS3/IL27RA/S100A14/TRPV4/CXCL12/CCL21/AIF1/CCL5/PYCARD/CORO1A/THBS1/CXCL17/CCL2/NBL1/DUSP1/SERPINE1	27
GO:0002478	antigen processing and presentation of exogenous peptide antigen	15/1151	40/18903	5.08977e-09	1.65834e-07	1.06536e-07	HLA-DOA/HLA-E/HLA-DPB1/HLA-DPA1/CD74/CTSS/HLA-DRA/HLA-DRB1/HLA-DQA1/HLA-F/HLA-DQB2/HLA-DRB5/HLA-DQB1/HLA-A/HLA-DQA2	15
GO:0050866	negative regulation of cell activation	38/1151	221/18903	5.69902e-09	1.84566e-07	1.1857e-07	AXL/EMILIN1/PRNP/FOXF1/SYT11/PDE5A/VSIR/CX3CL1/C1QTNF1/PRKG1/SFRP1/CYGB/GLI3/INPP5D/BMP4/PDGFRA/CD200/FGL2/RASSF5/LGALS3/RUNX1/CD74/ANXA1/THBD/VTCN1/TNFAIP3/LRRC32/CEBPB/LAPTM5/HLA-DRB1/CST7/PTPRC/CEACAM1/TYROBP/HLA-F/GPNMB/ID2/SCGB1A1	38
GO:0097530	granulocyte migration	31/1151	158/18903	5.84464e-09	1.88149e-07	1.20872e-07	ITGA9/ITGA1/CX3CL1/CSF1/RARRES2/IL34/JAM3/CSF1R/LGALS3/TGFB2/PECAM1/CD74/S100A14/TRPV4/EDN3/ANXA1/CCL21/CCL5/ITGB2/RAC2/CXCL6/THBS1/CXCL17/CCL2/EDN1/CXCL1/S100A9/CCL19/CXCL2/CD177/SAA1	31
GO:0050727	regulation of inflammatory response	57/1151	414/18903	6.23001e-09	1.9936e-07	1.28074e-07	NT5E/SERPINF1/PTGIS/FOXF1/ISL1/SYT11/IL33/GPRC5B/CX3CL1/GSTP1/WFDC1/STING1/TNC/NLRP1/LGALS1/PDE2A/SIRPA/ZYX/CASP1/CD200/TLR3/GATA3/TNFRSF1B/HLA-E/C3/TLR4/DUOXA1/EDNRB/GPSM3/IL6ST/TRPV4/ETS1/ANXA1/ALOX5AP/TNFAIP3/ITGA2/CALCRL/CEBPB/CCL5/SOCS3/HLA-DRB1/BIRC3/PYCARD/MGLL/CST7/PTPRC/CXCL17/S100A9/SELE/PTGS2/IL6/SCGB1A1/ZFP36/SERPINE1/SAA1/ACP5/NPY	57
GO:0060538	skeletal muscle organ development	33/1151	176/18903	6.27927e-09	1.99748e-07	1.28323e-07	CAV2/CAV1/ASB2/MYOCD/ITGA7/SVIL/CFL2/HLF/TCF21/POPDC2/DES/CNTNAP1/HOXD10/MEF2C/DMD/TGFB1/VAMP5/ELN/BCL2/KLF5/CNTFR/DLL1/HEYL/HOXD9/IGF2/FGFRL1/BTG2/CASQ1/EGR1/FOS/EGR2/ACTA1/ATF3	33
GO:1903557	positive regulation of tumor necrosis factor superfamily cytokine production	25/1151	109/18903	6.38425e-09	2.01893e-07	1.29701e-07	ISL1/IL33/CLU/NFATC4/ARHGEF2/TLR3/HLA-E/CYBA/TLR4/PIK3R1/CD14/ARID5A/AKAP12/PYCARD/PTPRC/CYBB/THBS1/CD2/TYROBP/CCL19/HSPB1/IL6/ORM2/SPON2/ORM1	25
GO:0001952	regulation of cell-matrix adhesion	27/1151	125/18903	6.43849e-09	2.02417e-07	1.30038e-07	EFEMP2/FERMT2/MMP14/VCL/PLEKHA2/CX3CL1/CORO1C/CSF1/EPHA3/SFRP1/GPM6B/COL16A1/EFNA5/FAM107A/TLN1/ACVRL1/BCL2/KDR/PLAU/PIK3R1/RRAS/CCL21/CD3E/THBS1/FERMT1/MYOC/SERPINE1	27
GO:0051384	response to glucocorticoid	29/1151	142/18903	6.95842e-09	2.17491e-07	1.39722e-07	SERPINF1/ISL1/FAM107A/IGFBP7/PTGDS/AQP1/PAM/ZFP36L1/A2M/FBXO32/FIBIN/ZFP36L2/BCL2/NR3C1/ANXA1/MAOB/AIF1/CLDN1/EDN1/ALPL/SDC1/PTGS2/DDIT4/IL6/SCGB1A1/FOS/ZFP36/CYP1B1/FOSB	29
GO:0010951	negative regulation of endopeptidase activity	41/1151	252/18903	7.63933e-09	2.37393e-07	1.52508e-07	SERPINF1/ITIH5/PRNP/TIMP2/SERPING1/IFI16/COL6A3/GAS6/WFDC1/SPOCK3/SERPINB1/PAPLN/CRYAB/AQP1/SERPINB9/TIMP3/RARRES1/A2M/ANXA2/WFDC2/TIMP1/SFRP2/C3/CRIM1/SERPINB5/BIRC3/LXN/BST2/CPAMD8/CST7/THBS1/CSTA/LTF/COL7A1/SERPINF2/TIMP4/PTGS2/SERPINE1/PI3/SERPINB11/CST1	41
GO:0032943	mononuclear cell proliferation	47/1151	312/18903	7.96051e-09	2.45952e-07	1.58006e-07	PRNP/EFNB1/PDE5A/VSIR/MSN/CD40/CSF1/TGFBR2/INPP5D/BMP4/ELF4/MEF2C/TNFRSF1B/RASSF5/LGALS3/IL27RA/HLA-E/BCL2/HLA-DPB1/TLR4/HLA-DPA1/CD74/IL6ST/AHR/ANXA1/VCAM1/GPR183/VTCN1/AIF1/LRRC32/IL7R/CEBPB/CD3E/CCL5/IGF2/HLA-DRB1/RAC2/PYCARD/PTPRC/CORO1A/TYROBP/GPNMB/CCL19/HLA-A/IL6/SCGB1A1/CD38	47
GO:0030324	lung development	34/1151	187/18903	8.41245e-09	2.5843e-07	1.66022e-07	FGF2/PDPN/FOXF1/MYOCD/MMP14/TCF21/TGFBR2/ALDH1A2/GLI3/BMP4/CRISPLD2/PDGFRB/HHIP/PDGFRA/EPAS1/FGFR2/SPRY2/SPRY1/HSD11B1/FGF7/CCN2/ITGB6/LTBP3/TGFB3/ITGA3/KDR/IGFBP5/COL3A1/HEG1/HOPX/GPC3/KLF2/RCN3/MME	34
GO:0002688	regulation of leukocyte chemotaxis	27/1151	127/18903	9.25121e-09	2.82582e-07	1.81538e-07	CSF1/ANO6/GAS6/RARRES2/IL34/JAM3/CSF1R/CD74/GPSM3/S100A14/TRPV4/EDN3/CXCL12/CCL21/AIF1/CCL5/RAC2/PTN/THBS1/CXCL17/CCL2/NBL1/DUSP1/EDN1/CCL19/IL6/SERPINE1	27
GO:0002504	antigen processing and presentation of peptide or polysaccharide antigen via MHC class II	14/1151	36/18903	9.53946e-09	2.86504e-07	1.84057e-07	HLA-DOA/HLA-DPB1/HLA-DPA1/CD74/CTSS/HLA-DRA/HLA-DRB1/PYCARD/HLA-DQA1/THBS1/HLA-DQB2/HLA-DRB5/HLA-DQB1/HLA-DQA2	14
GO:0018149	peptide cross-linking	14/1151	36/18903	9.53946e-09	2.86504e-07	1.84057e-07	EGFLAM/SPOCK3/DCN/NDNF/ANXA1/COL3A1/FN1/THBS1/CSTA/F13A1/BGN/TGM4/TGM2/PI3	14
GO:0071711	basement membrane organization	14/1151	36/18903	9.53946e-09	2.86504e-07	1.84057e-07	CAV2/CAV1/NID1/PHLDB1/LAMA2/COL4A1/LAMB3/NTN4/COL3A1/CTSS/HPN/LAMB1/LAMB2/FERMT1	14
GO:0006875	cellular metal ion homeostasis	57/1151	420/18903	1.05342e-08	3.14621e-07	2.02121e-07	CAV2/EDNRA/ATP2B4/SLC24A3/FGF2/CAV1/TRPC4/FLNA/HEPH/SLC8A1/ANXA6/PRNP/JPH2/RGN/PLN/KCNMA1/CD40/CX3CL1/ATP1A2/JPH4/ATP1B2/KCTD17/PRKCB/RASA3/DMD/P2RX1/GSTM2/SLC40A1/SLC22A17/BCL2/CYBA/CASQ2/SCNN1A/TRPV4/EDN3/ATP1B1/CXCL12/DMPK/CCL21/CCL5/CYBRD1/PTPRC/CORO1A/CP/EDN1/CASQ1/ITPR1/S100A9/CCL19/MT1A/LCN2/MT1X/SCNN1G/TGM2/MT1M/MT1E/MT1G	57
GO:0001654	eye development	54/1151	388/18903	1.07293e-08	3.18677e-07	2.04726e-07	MEIS1/ATP2B4/FGF2/MEIS2/SERPINF1/CHRDL1/VSTM4/MITF/NES/EFEMP1/SH3PXD2B/FOXC1/ZEB1/RARB/TGFBR2/ALDH1A2/RHOJ/CRYAB/RARG/SMARCD3/CLIC4/COL8A2/GLI3/SMOC1/VIM/SPRED1/BMP4/PDGFRB/FBN1/AQP1/PDGFRA/COL5A1/SPRY2/SPRY1/TMOD1/ACVRL1/PBX1/NDP/MFAP2/GATA3/COL4A1/EPHA2/TGFB2/BCL2/KDR/SLITRK6/DLL1/FOXF2/LAMB2/COL8A1/CPAMD8/COL5A2/DLX1/CYP1B1	54
GO:0046651	lymphocyte proliferation	46/1151	305/18903	1.10502e-08	3.26405e-07	2.09691e-07	PRNP/EFNB1/PDE5A/VSIR/MSN/CD40/TGFBR2/INPP5D/BMP4/ELF4/MEF2C/TNFRSF1B/RASSF5/LGALS3/IL27RA/HLA-E/BCL2/HLA-DPB1/TLR4/HLA-DPA1/CD74/IL6ST/AHR/ANXA1/VCAM1/GPR183/VTCN1/AIF1/LRRC32/IL7R/CEBPB/CD3E/CCL5/IGF2/HLA-DRB1/RAC2/PYCARD/PTPRC/CORO1A/TYROBP/GPNMB/CCL19/HLA-A/IL6/SCGB1A1/CD38	46
GO:0090288	negative regulation of cellular response to growth factor stimulus	26/1151	120/18903	1.1428e-08	3.35721e-07	2.15676e-07	ATP2B4/FGF2/ADGRA2/EMILIN1/CHRDL1/SULF2/SFRP1/DCN/FBN1/HTRA1/NGFR/SPRY2/SPRY1/GATA3/MMRN2/RBPMS2/SPART/SULF1/CHRDL2/SFRP2/CRIM1/HTRA3/DKK1/THBS1/NBL1/DLX1	26
GO:1903034	regulation of response to wounding	32/1151	172/18903	1.29251e-08	3.76258e-07	2.41718e-07	FGF2/CAV1/FLNA/MYLK/FERMT2/EMILIN1/ACTA2/DDR2/SERPING1/C1QTNF1/PRKG1/ANO6/WFDC1/PDGFRA/ANXA2/CD34/KANK1/DUOX1/PLAU/ANXA1/THBD/TNFAIP3/CXCR4/PTN/CEACAM1/THBS1/FERMT1/CLDN1/SERPINF2/EDN1/TNFRSF12A/SERPINE1	32
GO:0110148	biomineralization	33/1151	181/18903	1.29479e-08	3.76258e-07	2.41718e-07	SLC24A3/NT5E/SLC8A1/DDR2/ROR2/ANO6/GAS6/GPM6B/BMP4/MEF2C/ECM1/SRGN/FGFR2/TGFB1/S1PR1/ITGB6/LTBP3/TGFB3/COL1A2/TMEM119/OMD/MGP/GPC3/CEBPB/CFTR/CLEC3B/PTN/KLF10/CCN1/LTF/COL1A1/ALPL/PTGS2	33
GO:0002690	positive regulation of leukocyte chemotaxis	23/1151	97/18903	1.3042e-08	3.76956e-07	2.42167e-07	CSF1/ANO6/GAS6/RARRES2/IL34/CSF1R/CD74/GPSM3/S100A14/TRPV4/EDN3/CXCL12/CCL21/AIF1/CCL5/RAC2/PTN/THBS1/CXCL17/EDN1/CCL19/IL6/SERPINE1	23
GO:0072073	kidney epithelium development	29/1151	146/18903	1.3468e-08	3.87186e-07	2.48738e-07	EDNRA/KANK2/FGF2/FOXC1/TCF21/RARB/SFRP1/WWTR1/EYA1/GLI3/BMP4/HOXD11/AQP1/DCHS1/MEF2C/FGFR2/SPRY1/ILK/PBX1/GATA3/CD34/BCL2/PECAM1/EDNRB/GPC3/DLL1/HEYL/LAMB2/SDC1	29
GO:0018108	peptidyl-tyrosine phosphorylation	53/1151	380/18903	1.36359e-08	3.8993e-07	2.50501e-07	CAV1/AXL/PRNP/DDR2/PDGFC/CTF1/ANGPT1/ISL1/EFEMP1/FGFR1/CNTN1/GPRC5B/ROR2/CD40/CSPG4/GAS6/AFAP1L2/PLPP3/ITGA5/EPHA3/SFRP1/MET/PDGFD/EFNA5/ARHGEF2/GFRA1/PDGFRB/PDGFRA/IL34/FGFR2/CSF1R/FGF7/TGFB1/KIT/EPHA2/MVP/SFRP2/PECAM1/CD74/KDR/IL6ST/HCLS1/ENPP2/CD3E/CCL5/SOCS3/CAMKK2/CD4/ITGB2/IGF2/PTPRC/EPHB6/IL6	53
GO:0030323	respiratory tube development	34/1151	191/18903	1.46494e-08	4.16694e-07	2.67695e-07	FGF2/PDPN/FOXF1/MYOCD/MMP14/TCF21/TGFBR2/ALDH1A2/GLI3/BMP4/CRISPLD2/PDGFRB/HHIP/PDGFRA/EPAS1/FGFR2/SPRY2/SPRY1/HSD11B1/FGF7/CCN2/ITGB6/LTBP3/TGFB3/ITGA3/KDR/IGFBP5/COL3A1/HEG1/HOPX/GPC3/KLF2/RCN3/MME	34
GO:0019884	antigen processing and presentation of exogenous antigen	16/1151	49/18903	1.59492e-08	4.5128e-07	2.89914e-07	MR1/HLA-DOA/HLA-E/HLA-DPB1/HLA-DPA1/CD74/CTSS/HLA-DRA/HLA-DRB1/HLA-DQA1/HLA-F/HLA-DQB2/HLA-DRB5/HLA-DQB1/HLA-A/HLA-DQA2	16
GO:0007492	endoderm development	21/1151	83/18903	1.62553e-08	4.57395e-07	2.93843e-07	ITGA7/MMP14/COL6A1/MMP2/ITGA5/COL4A2/BMP4/SOX7/COL5A1/ZFP36L1/LAMB3/FN1/LAMB1/DUSP5/ITGB2/DKK1/COL8A1/COL7A1/DUSP1/COL5A2/DUSP2	21
GO:0018212	peptidyl-tyrosine modification	53/1151	382/18903	1.63356e-08	4.57395e-07	2.93843e-07	CAV1/AXL/PRNP/DDR2/PDGFC/CTF1/ANGPT1/ISL1/EFEMP1/FGFR1/CNTN1/GPRC5B/ROR2/CD40/CSPG4/GAS6/AFAP1L2/PLPP3/ITGA5/EPHA3/SFRP1/MET/PDGFD/EFNA5/ARHGEF2/GFRA1/PDGFRB/PDGFRA/IL34/FGFR2/CSF1R/FGF7/TGFB1/KIT/EPHA2/MVP/SFRP2/PECAM1/CD74/KDR/IL6ST/HCLS1/ENPP2/CD3E/CCL5/SOCS3/CAMKK2/CD4/ITGB2/IGF2/PTPRC/EPHB6/IL6	53
GO:0002062	chondrocyte differentiation	25/1151	114/18903	1.68322e-08	4.6886e-07	3.01208e-07	ANXA6/EFEMP1/SULF2/RARB/TGFBR2/RARG/GLI3/CHST11/SNAI2/BMP4/MEF2C/ECM1/TGFBI/CYTL1/ACVRL1/TGFB1/CCN2/LOXL2/LTBP3/SULF1/COL27A1/SFRP2/RUNX1/COL3A1/ARID5A	25
GO:0031214	biomineral tissue development	32/1151	174/18903	1.72685e-08	4.78533e-07	3.07422e-07	SLC24A3/SLC8A1/DDR2/ROR2/ANO6/GAS6/GPM6B/BMP4/MEF2C/ECM1/SRGN/FGFR2/TGFB1/S1PR1/ITGB6/LTBP3/TGFB3/COL1A2/TMEM119/OMD/MGP/GPC3/CEBPB/CFTR/CLEC3B/PTN/KLF10/CCN1/LTF/COL1A1/ALPL/PTGS2	32
GO:0055002	striated muscle cell development	19/1151	69/18903	1.74198e-08	4.8025e-07	3.08526e-07	LMOD1/MYH11/PGM5/FLNC/TPM1/CFL2/CSRP1/MYL9/LDB3/FHOD3/PDGFRB/PDGFRA/TMOD1/ACTC1/EDN1/CASQ1/SDC1/KRT19/ACTA1	19
GO:0060541	respiratory system development	36/1151	211/18903	1.76138e-08	4.83123e-07	3.10371e-07	FGF2/PDPN/FOXF1/MYOCD/MMP14/TCF21/TGFBR2/ALDH1A2/RARG/GLI3/BMP4/CRISPLD2/PDGFRB/HHIP/PDGFRA/EPAS1/FGFR2/SPRY2/SPRY1/HSD11B1/FGF7/CCN2/ITGB6/LTBP3/TGFB3/ITGA3/KDR/IGFBP5/COL3A1/HEG1/HOPX/GPC3/KLF2/RCN3/FGFRL1/MME	36
GO:0045861	negative regulation of proteolysis	50/1151	352/18903	1.92602e-08	5.25597e-07	3.37658e-07	SERPINF1/ITIH5/PRNP/TIMP2/SERPING1/IFI16/MAP1A/COL6A3/GAS6/WFDC1/SPOCK3/SERPINB1/PAPLN/CTSB/CRYAB/GAS1/AQP1/SERPINB9/ECM1/TIMP3/RARRES1/A2M/ANXA2/WFDC2/TIMP1/SFRP2/C3/CRIM1/PLAU/GPC3/SERPINB5/LRP1/BIRC3/LXN/BST2/CPAMD8/CST7/PI16/THBS1/CSTA/LTF/COL7A1/SERPINF2/TIMP4/PTGS2/SERPINE1/PI15/PI3/SERPINB11/CST1	50
GO:1902903	regulation of supramolecular fiber organization	53/1151	384/18903	1.95367e-08	5.30452e-07	3.40776e-07	FLNA/EFEMP2/FERMT2/LMOD1/EMILIN1/CLIP3/SYNPO2/BMERB1/LPAR1/KIRREL1/SYNPO/GSN/CDC42EP3/SVIL/TPM1/DAAM2/CFL2/CX3CL1/CLU/MAP1A/SFRP1/MET/CRYAB/FHOD3/ARHGEF2/FCHSD2/AEBP1/MYADM/MAP1B/CDC42EP4/TMOD1/ELN/CCN2/S1PR1/CAPG/TGFB3/KANK1/TRPV4/ID1/HCLS1/PIK3R1/CXCL12/CCL21/RGCC/PYCARD/GMFG/CORO1A/MYOC/RHPN1/SERPINF2/EDN1/TMSB15A/CDC42EP5	53
GO:0034341	response to interferon-gamma	28/1151	140/18903	2.03993e-08	5.51089e-07	3.54034e-07	GSN/CD40/CX3CL1/GBP2/RAB7B/VIM/SIRPA/ZYX/CASP1/CDC42EP4/TLR3/GBP1/TLR4/HLA-DPA1/CD74/IFITM3/CCL21/IFITM2/AIF1/CCL5/IFITM1/BST2/GBP4/CLDN1/CCL2/EDN1/CCL19/UBD	28
GO:0048738	cardiac muscle tissue development	39/1151	241/18903	2.05612e-08	5.52686e-07	3.5506e-07	EDNRA/FGF2/GJA1/FZD7/TGFBR3/SLC8A1/ASB2/MYH11/MYOCD/FHL2/ISL1/JPH2/FOXC1/TPM1/PLN/RARB/GJC1/TGFBR2/ALDH1A2/SGCB/FHOD3/BMP4/PDGFRB/MEF2C/PDGFRA/FGFR2/TGFB1/S1PR1/ACTC1/TGFB2/RUNX1/HEG1/HOPX/DLL1/DKK1/PI16/EDN1/ID2/TNNC1	39
GO:0003015	heart process	41/1151	261/18903	2.14333e-08	5.7326e-07	3.68277e-07	EDNRA/ATP2B4/GJA1/CAV1/FLNA/KCNJ8/SLC8A1/ISL1/GSN/PDE5A/TPM1/PLN/ABCC9/POPDC2/GJC1/ATP1A2/ATP1B2/HSPB7/WWTR1/DES/CELF2/KCNH2/EPAS1/DMD/GSTM2/CCN2/ACTC1/TGFB2/ADRA1D/EDNRB/CASQ2/CACNA1H/EDN3/ATP1B1/HOPX/DMPK/CXCR4/RAMP3/EDN1/TNNC1/CHGA	41
GO:0006816	calcium ion transport	58/1151	440/18903	2.26371e-08	6.0246e-07	3.87036e-07	EDNRA/ATP2B4/SLC24A3/FGF2/CAV1/TRPC4/FLNA/MYLK/CACHD1/SLC8A1/ANXA6/PRNP/JPH2/RGN/PLN/CX3CL1/ANO6/NCS1/GAS6/ATP1A2/JPH4/PRKCB/PDGFRB/RASA3/DMD/STAC/GEM/P2RX1/GSTM2/ANXA2/LGALS3/CCN2/BCL2/CYBA/STAC2/EDNRB/CASQ2/TRPV4/CACNA1H/ATP1B1/CXCL12/CCL21/CXCR4/CALCRL/CCL5/CD4/RAMP3/AHNAK/RRAD/PTPRC/CORO1A/CCL2/EDN1/CASQ1/ITPR1/CCL19/PTGS2/CACNG4	58
GO:0010634	positive regulation of epithelial cell migration	32/1151	176/18903	2.29533e-08	6.04886e-07	3.88595e-07	FGF2/ADGRA2/ANGPT1/FGFR1/CD40/PLPP3/TGFBR2/RHOJ/MET/NRP2/BMP4/MAPRE2/FGF7/TGFB1/GATA3/TGFB2/ITGA3/RHOB/SPARC/KDR/ETS1/ANXA1/PRKCA/ATOH8/RRAS/ENPP2/ITGA2/JCAD/THBS1/EDN1/PTGS2/HSPB1	32
GO:0050680	negative regulation of epithelial cell proliferation	32/1151	176/18903	2.29533e-08	6.04886e-07	3.88595e-07	CAV2/CAV1/SERPINF1/TGFBR3/ISL1/RGN/ZEB1/LIMS2/SFRP1/MCC/SNAI2/BMP4/MEF2C/ROBO1/FGFR2/NGFR/ACVRL1/TGFB1/GATA3/MMRN2/SULF1/TGFB2/SFRP2/SPARC/ATOH8/GPC3/HPN/RGCC/CEACAM1/THBS1/KRT4/CCL2	32
GO:0019882	antigen processing and presentation	24/1151	108/18903	2.46712e-08	6.46988e-07	4.15642e-07	MR1/RAB34/FGL2/HLA-DOA/RFTN1/HLA-E/HLA-DPB1/HLA-DPA1/CD74/CTSS/CCL21/HLA-DRA/HLA-DRB1/PYCARD/HLA-DQA1/THBS1/HLA-F/HLA-DQB2/HLA-DRB5/CCL19/HLA-DQB1/HLA-A/HLA-DQA2/AZGP1	24
GO:0048041	focal adhesion assembly	21/1151	85/18903	2.56095e-08	6.67314e-07	4.287e-07	FERMT2/SORBS1/MMP14/VCL/ACTN1/CORO1C/EPHA3/SFRP1/GPM6B/COL16A1/EFNA5/FAM107A/TLN1/AJUBA/ACVRL1/TRIP6/BCL2/KDR/ITGA2/THBS1/MYOC	21
GO:0045637	regulation of myeloid cell differentiation	36/1151	214/18903	2.57077e-08	6.67314e-07	4.287e-07	MEIS1/FAXDC2/MEIS2/MITF/ROR2/CSF1/RAB7B/SFRP1/RARG/INPP5D/FBN1/MEF2C/IL34/TLR3/TGFB1/ZFP36L1/RUNX1/TLR4/CD74/ETS1/PRKCA/HCLS1/PIK3R1/EVI2B/DLL1/CEBPB/CD4/C1QC/HLA-DRB1/CEACAM1/KLF10/TYROBP/LTF/ID2/FOS/ZFP36	36
GO:0048251	elastic fiber assembly	8/1151	11/18903	2.58187e-08	6.67314e-07	4.287e-07	EFEMP2/EMILIN1/MYH11/FBLN5/MFAP4/LTBP3/THSD4/COL3A1	8
GO:0030168	platelet activation	27/1151	133/18903	2.6123e-08	6.71949e-07	4.31678e-07	AXL/FLNA/PDPN/VCL/CD40/C1QTNF1/PRKG1/CSRP1/MYL9/TLN1/PDGFRA/SELP/P2RX1/ILK/PLA2G4A/TLR4/IL6ST/PRKCA/COL3A1/FN1/THBD/PLSCR1/CEACAM1/ADRA2C/HSPB1/IL6/SAA1	27
GO:1903053	regulation of extracellular matrix organization	17/1151	57/18903	2.64705e-08	6.77644e-07	4.35337e-07	PDPN/EFEMP2/EMILIN1/DDR2/NID1/PHLDB1/AEBP1/ANTXR1/LAMA2/TGFB1/TNFRSF1B/RUNX1/LAMB1/RGCC/LRP1/LAMB2/IL6	17
GO:0072507	divalent inorganic cation homeostasis	50/1151	356/18903	2.79159e-08	7.11259e-07	4.56931e-07	CAV2/EDNRA/ATP2B4/SLC24A3/FGF2/CAV1/NT5E/TRPC4/FLNA/SLC8A1/ANXA6/JPH2/RGN/PLN/CD40/CX3CL1/ATP1A2/JPH4/KCTD17/PRKCB/RASA3/DMD/P2RX1/GSTM2/BCL2/CYBA/KDR/CASQ2/S100A14/TRPV4/EDN3/ATP1B1/CXCL12/DMPK/CCL21/CCL5/PTPRC/CORO1A/EDN1/ALPL/CASQ1/ITPR1/S100A9/CCL19/MT1A/MT1X/TGM2/MT1M/MT1E/MT1G	50
GO:0071356	cellular response to tumor necrosis factor	38/1151	234/18903	2.82829e-08	7.17211e-07	4.60755e-07	CD40/CX3CL1/GBP2/GAS6/GSTP1/SFRP1/SLC2A4/ARHGEF2/CASP1/CTSK/ILK/ZFP36L1/GBP1/CCDC3/GATA3/TNFRSF1B/ZFP36L2/CYBA/VCAM1/CCL21/AKAP12/PID1/TNFAIP3/KLF2/CCL5/LAPTM5/BIRC3/PYCARD/THBS1/PLVAP/CLDN1/CCL2/COL1A1/EDN1/CCL19/FOS/ZFP36/CYP1B1	38
GO:0048002	antigen processing and presentation of peptide antigen	18/1151	64/18903	2.87326e-08	7.25194e-07	4.65883e-07	MR1/HLA-DOA/HLA-E/HLA-DPB1/HLA-DPA1/CD74/CTSS/HLA-DRA/HLA-DRB1/PYCARD/HLA-DQA1/HLA-F/HLA-DQB2/HLA-DRB5/HLA-DQB1/HLA-A/HLA-DQA2/AZGP1	18
GO:0010714	positive regulation of collagen metabolic process	12/1151	28/18903	3.00126e-08	7.53962e-07	4.84365e-07	DDR2/VSIR/VIM/BMP4/PDGFRB/TGFB1/CCN2/TGFB3/RUNX1/ITGA2/RGCC/SERPINF2	12
GO:0002697	regulation of immune effector process	52/1151	379/18903	3.24327e-08	8.10968e-07	5.20987e-07	AXL/FOXF1/ANGPT1/SERPING1/CFH/IL33/GPRC5B/CD40/MR1/SERPINB9/FGL2/TLR3/TGFB1/A2M/GATA3/TNFRSF1B/KIT/LGALS3/IL27RA/HLA-E/TGFB3/TGFB2/C3/TLR4/CD74/AHR/ANXA1/ARID5A/HLA-DRA/KLRB1/IL7R/LAPTM5/ITGB2/HLA-DRB1/RAC2/CXCL6/PYCARD/BST2/PTPRC/CEACAM1/TYROBP/HLA-F/CCL19/HLA-A/IL6/CD177/NR4A3/ACP5/JUNB/AZGP1/SPON2/PGC	52
GO:0061564	axon development	62/1151	490/18903	3.4814e-08	8.66481e-07	5.5665e-07	EDNRA/TSPAN2/FLNA/NEXN/PALLD/ISL1/ARHGEF25/EFNB1/VCL/CNTN1/DPYSL2/MMP2/BOC/MAP1A/RND2/NLGN3/FEZ1/EPHA3/NFASC/EFNA5/TNC/NTN1/GLI3/NRP2/CNTNAP1/S100A6/MAP1B/ROBO1/FGFR2/CSF1R/NCAM1/LAMA2/NGFR/PLXND1/UNC5B/GATA3/UST/FLRT3/EPHA2/SPART/CDH11/APBB1/BCL2/DIXDC1/LGR6/NDN/SLITRK6/S100B/EDN3/CXCL12/FN1/CRABP2/RAC2/LAMB2/PTN/EPHB6/EDN1/SEMA3C/CCK/EGR2/NEFH/VSTM2L	62
GO:0042476	odontogenesis	27/1151	135/18903	3.63547e-08	9.00658e-07	5.78607e-07	FOXC1/CSF1/FST/GLI3/BMP4/HTRA1/AQP1/PDGFRA/ID3/FGFR2/PAM/NGFR/TP63/CD34/ITGB6/TGFB3/TGFB2/COL1A2/LAMB1/CFTR/COL1A1/EDN1/ALPL/SDC1/AQP3/SERPINE1/DLX1	27
GO:0001885	endothelial cell development	18/1151	65/18903	3.74927e-08	9.2459e-07	5.93981e-07	EDNRA/VCL/MSN/MET/CLIC4/PDE2A/MYADM/COL18A1/COL15A1/GSTM3/S1PR3/PECAM1/EDNRB/HEG1/CLDN5/ARHGEF26/CLDN1/FASN	18
GO:0010001	glial cell differentiation	37/1151	227/18903	3.88785e-08	9.54386e-07	6.13123e-07	FGF2/TSPAN2/TRPC4/LPAR1/IL33/DAAM2/CNTN1/ROR2/CLU/ANO1/PLPP3/GLI3/CNTNAP1/VIM/ITGB4/IL34/ID4/PRDM8/ILK/TGFB1/TNFRSF1B/MAL/TLR4/IL6ST/MXRA8/DLL1/CXCR4/C1QA/LRP1/LAMB2/PTN/MYOC/S100A9/ID2/IL6/EGR2/DLX1	37
GO:0014910	regulation of smooth muscle cell migration	21/1151	87/18903	3.97378e-08	9.71046e-07	6.23826e-07	DDR2/LPAR1/MYOCD/TPM1/PRKG1/PDGFD/PDGFRB/MEF2C/BCL2/TLR4/PLAU/IGFBP5/AIF1/ITGA2/LRP1/CCL5/IGFBP3/ADAMTS1/SERPINE1/NR4A3/CYP1B1	21
GO:0010038	response to metal ion	50/1151	360/18903	4.01665e-08	9.77081e-07	6.27703e-07	CAV1/SERPINF1/KCNMB1/PRNP/SYT11/KCNMA1/HAAO/S100A16/NFATC4/CLIC4/RASGRP2/AQP1/MEF2C/PAM/SLC40A1/KIT/LOXL2/FIBIN/BCL2/CASQ2/CACNA1H/MAOB/ALOX5AP/VCAM1/CD14/PLSCR1/PENK/CYBRD1/CYBB/THBS1/CLDN1/SOD2/EDN1/SDC1/MT1A/SOD3/PTGS2/MT1X/AQP3/KCNK3/CPNE7/FOS/ACTA1/AOC1/MT1M/JUNB/MT1E/TNNC1/FOSB/MT1G	50
GO:0002495	antigen processing and presentation of peptide antigen via MHC class II	13/1151	34/18903	4.12396e-08	9.98668e-07	6.41571e-07	HLA-DOA/HLA-DPB1/HLA-DPA1/CD74/CTSS/HLA-DRA/HLA-DRB1/PYCARD/HLA-DQA1/HLA-DQB2/HLA-DRB5/HLA-DQB1/HLA-DQA2	13
GO:1901215	negative regulation of neuron death	36/1151	218/18903	4.2007e-08	1.01269e-06	6.50577e-07	AXL/SERPINF1/ANGPT1/ISL1/NES/CX3CL1/CSF1/NFATC4/FAIM2/MEF2C/CD200/NDNF/PLXND1/UNC5B/TNFRSF1B/IL27RA/CD34/TGFB3/BCL2/KDR/IL6ST/CNTFR/CEBPB/NCOA7/CORO1A/FOXQ1/HLA-F/BTG2/GPNMB/CCL2/SOD2/VSTM2L/NR4A3/DLX1/CHGA/NPY	36
GO:0034446	substrate adhesion-dependent cell spreading	24/1151	111/18903	4.32983e-08	1.03916e-06	6.67583e-07	AXL/FZD7/FLNA/PDPN/FERMT2/FBLN1/CORO1C/LIMS2/EFNA5/MYADM/ANTXR1/ILK/ITGA8/GBP1/LAMB3/NTN4/KANK1/PIK3R1/FN1/LAMB1/LAMB2/OLFM4/RAC3/MYOC	24
GO:0003151	outflow tract morphogenesis	20/1151	80/18903	4.42455e-08	1.05717e-06	6.79155e-07	EDNRA/TGFBR3/ISL1/FOXC1/TGFBR2/EYA1/NRP2/BMP4/MEF2C/ROBO1/FGFR2/ILK/PLXND1/ELN/TGFB2/SFRP2/CLDN5/HEYL/EDN1/SEMA3C	20
GO:0032965	regulation of collagen biosynthetic process	14/1151	40/18903	4.63355e-08	1.10221e-06	7.0809e-07	EMILIN1/DDR2/CYGB/VIM/BMP4/PDGFRB/TGFB1/CCN2/TGFB3/RUNX1/ITGA2/RGCC/SERPINF2/IL6	14
GO:0007409	axonogenesis	57/1151	438/18903	4.70557e-08	1.11441e-06	7.15928e-07	EDNRA/NEXN/PALLD/ISL1/ARHGEF25/EFNB1/VCL/CNTN1/DPYSL2/BOC/MAP1A/RND2/NLGN3/FEZ1/EPHA3/NFASC/EFNA5/NTN1/GLI3/NRP2/CNTNAP1/S100A6/MAP1B/ROBO1/FGFR2/CSF1R/NCAM1/LAMA2/NGFR/PLXND1/UNC5B/GATA3/UST/FLRT3/EPHA2/SPART/CDH11/APBB1/BCL2/DIXDC1/LGR6/NDN/SLITRK6/S100B/EDN3/CXCL12/FN1/CRABP2/RAC2/LAMB2/EPHB6/EDN1/SEMA3C/CCK/EGR2/NEFH/VSTM2L	57
GO:0072012	glomerulus vasculature development	12/1151	29/18903	4.83632e-08	1.14035e-06	7.32594e-07	EDNRA/ACTA2/ANGPT1/TCF21/PDGFD/BMP4/PDGFRB/AQP1/PDGFRA/CD34/PECAM1/EGR1	12
GO:0071774	response to fibroblast growth factor	25/1151	120/18903	4.97358e-08	1.1676e-06	7.50095e-07	FGF2/FGFR1/SULF2/SFRP1/HHIP/FGFR2/NGFR/SPRY2/SPRY1/NDNF/FGF7/ZFP36L1/GATA3/FLRT3/CCN2/SULF1/ZFP36L2/CCL5/THBS1/FGFRL1/CCL2/COL1A1/SCGB1A1/ZFP36/EGR3	25
GO:0008217	regulation of blood pressure	33/1151	191/18903	5.032e-08	1.17618e-06	7.55607e-07	EDNRA/EMILIN1/ACTA2/NPR2/TPM1/ABCC9/GAS6/NAV2/ATP1A2/ACVRL1/P2RX1/CD34/COL1A2/PTGS1/CYBA/ADRA1D/EDNRB/SCNN1A/EDN3/SLC2A5/CPA3/DLL1/SERPINF2/SOD2/EDN1/ID2/PTGS2/SGK1/SCNN1G/ANPEP/CHGA/OR51E2/NPY	33
GO:0042129	regulation of T cell proliferation	32/1151	182/18903	5.23334e-08	1.21794e-06	7.82438e-07	PRNP/EFNB1/PDE5A/VSIR/TGFBR2/BMP4/TNFRSF1B/LGALS3/IL27RA/HLA-E/HLA-DPB1/HLA-DPA1/IL6ST/ANXA1/VCAM1/VTCN1/AIF1/LRRC32/CEBPB/CD3E/CCL5/IGF2/HLA-DRB1/RAC2/PYCARD/PTPRC/CORO1A/GPNMB/CCL19/HLA-A/IL6/SCGB1A1	32
GO:1903131	mononuclear cell differentiation	60/1151	473/18903	5.29434e-08	1.22683e-06	7.88146e-07	AXL/FZD7/MMP14/VSIR/ZEB1/CSF1/IFI16/GAS6/LEPR/MR1/SFRP1/TGFBR2/SMARCD3/GLI3/INPP5D/LGALS1/BMP4/IL34/CTSK/CSF1R/FGL2/HLA-DOA/PBX1/ZFP36L1/GATA3/TMEM176A/KIT/ITGB6/TMEM176B/ZFP36L2/BCL2/RUNX1/CD74/ITGB8/ANXA1/PIK3R1/VCAM1/GPR183/HLA-DRA/DLL1/IL7R/CEBPB/CD3E/CD4/HLA-DRB1/PTPRC/CD2/ITM2A/CD3D/IL2RG/CCL19/ID2/UBD/FASN/EGR1/IL6/FOS/EGR3/JUNB/MT1G	60
GO:0007519	skeletal muscle tissue development	30/1151	164/18903	5.43569e-08	1.25417e-06	8.05715e-07	CAV2/CAV1/ASB2/MYOCD/ITGA7/SVIL/CFL2/HLF/TCF21/POPDC2/CNTNAP1/HOXD10/MEF2C/DMD/TGFB1/VAMP5/ELN/BCL2/KLF5/DLL1/HEYL/HOXD9/IGF2/BTG2/CASQ1/EGR1/FOS/EGR2/ACTA1/ATF3	30
GO:0033674	positive regulation of kinase activity	62/1151	496/18903	5.45998e-08	1.2544e-06	8.05857e-07	ATP2B4/FGF2/AXL/FERMT2/PRNP/DDR2/PDGFC/ANGPT1/FGFR1/PDE5A/GPRC5B/ROR2/CD40/CLU/LMO4/CSF1/GAS6/AFAP1L2/EPHA3/TGFBR2/CCND2/MET/PDGFD/EFNA5/TNFAIP8L3/PDGFRB/MEF2C/PDGFRA/IL34/ROBO1/FGFR2/CSF1R/AJUBA/SPRY2/TLR3/TGFB1/KIT/EPHA2/TGFB2/TLR4/CD74/KDR/EDN3/CCL21/RGCC/CCL5/CAMKK2/CD4/IRS1/IGF2/HLA-DRB1/DKK1/PTPRC/THBS1/CCN1/LTF/EPHB6/ADRA2C/EDN1/CCL19/ANG/EGR1	62
GO:0010594	regulation of endothelial cell migration	37/1151	230/18903	5.52449e-08	1.26252e-06	8.11078e-07	ATP2B4/FGF2/ADGRA2/SERPINF1/ANGPT1/FGFR1/CD40/PLPP3/RHOJ/MET/NRP2/DCN/SPRED1/BMP4/MEF2C/ACVRL1/TGFB1/GATA3/MMRN2/EPHA2/RHOB/SPARC/KDR/ETS1/ANXA1/PRKCA/GADD45A/ATOH8/RRAS/RGCC/JCAD/PTN/CEACAM1/THBS1/EDN1/PTGS2/HSPB1	37
GO:0001570	vasculogenesis	20/1151	81/18903	5.54233e-08	1.26252e-06	8.11078e-07	CAV1/TGFBR3/FOXF1/MYOCD/GJC1/TGFBR2/SPRED1/PDGFRB/TGFB1/ZFP36L1/CD34/EPHA2/ITGB8/KDR/HEG1/RRAS/ACKR3/AMOT/CEACAM1/JUNB	20
GO:0009636	response to toxic substance	39/1151	250/18903	5.70958e-08	1.28969e-06	8.28534e-07	CES1/INMT/GSTP1/CYGB/FBLN5/PDGFRB/GPX3/MAP1B/ABCB1/GPX8/GSTM2/ABCG2/BCL2/PTGS1/GSTM3/DUOX1/AHR/MAOB/ALOX5AP/GPX7/GPX2/CCL5/PENK/CLDN1/SOD2/SDC1/S100A9/MT1A/SOD3/PTGS2/MT1X/SLC15A2/FOS/GSTA1/ALDH1A1/CYP1B1/MT1M/MT1E/MT1G	39
GO:0060047	heart contraction	39/1151	250/18903	5.70958e-08	1.28969e-06	8.28534e-07	EDNRA/ATP2B4/GJA1/CAV1/FLNA/KCNJ8/SLC8A1/ISL1/GSN/PDE5A/TPM1/PLN/ABCC9/POPDC2/GJC1/ATP1A2/ATP1B2/HSPB7/DES/CELF2/KCNH2/EPAS1/DMD/GSTM2/CCN2/ACTC1/TGFB2/ADRA1D/EDNRB/CASQ2/CACNA1H/EDN3/ATP1B1/HOPX/DMPK/CXCR4/EDN1/TNNC1/CHGA	39
GO:0072503	cellular divalent inorganic cation homeostasis	46/1151	323/18903	6.56027e-08	1.47565e-06	9.47997e-07	CAV2/EDNRA/ATP2B4/SLC24A3/FGF2/CAV1/TRPC4/FLNA/SLC8A1/ANXA6/JPH2/RGN/PLN/CD40/CX3CL1/ATP1A2/JPH4/KCTD17/PRKCB/RASA3/DMD/P2RX1/GSTM2/BCL2/CYBA/CASQ2/TRPV4/EDN3/ATP1B1/CXCL12/DMPK/CCL21/CCL5/PTPRC/CORO1A/EDN1/CASQ1/ITPR1/S100A9/CCL19/MT1A/MT1X/TGM2/MT1M/MT1E/MT1G	46
GO:1902107	positive regulation of leukocyte differentiation	32/1151	184/18903	6.82316e-08	1.52205e-06	9.77803e-07	AXL/MMP14/VSIR/ROR2/CSF1/GAS6/TGFBR2/SMARCD3/GLI3/INPP5D/IL34/TGFB1/ZFP36L1/GATA3/RUNX1/CD74/ANXA1/PRKCA/HCLS1/EVI2B/HLA-DRA/IL7R/CD4/HLA-DRB1/PTPRC/KLF10/TYROBP/IL2RG/CCL19/ID2/FOS/EGR3	32
GO:1903708	positive regulation of hemopoiesis	32/1151	184/18903	6.82316e-08	1.52205e-06	9.77803e-07	AXL/MMP14/VSIR/ROR2/CSF1/GAS6/TGFBR2/SMARCD3/GLI3/INPP5D/IL34/TGFB1/ZFP36L1/GATA3/RUNX1/CD74/ANXA1/PRKCA/HCLS1/EVI2B/HLA-DRA/IL7R/CD4/HLA-DRB1/PTPRC/KLF10/TYROBP/IL2RG/CCL19/ID2/FOS/EGR3	32
GO:0030278	regulation of ossification	25/1151	122/18903	7.01107e-08	1.5575e-06	1.00058e-06	SLC8A1/DDR2/CSF1/ANO6/SFRP1/GPM6B/BMP4/MEF2C/ECM1/SRGN/PBX1/TGFB1/S1PR1/LTBP3/TGFB3/TGFB2/BCL2/TMEM119/OMD/MGP/DKK1/PTN/CCN1/LTF/EGR2	25
GO:0002396	MHC protein complex assembly	10/1151	20/18903	7.1011e-08	1.56457e-06	1.00512e-06	HLA-DOA/HLA-DPB1/HLA-DPA1/HLA-DRA/HLA-DRB1/HLA-DQA1/HLA-DQB2/HLA-DRB5/HLA-DQB1/HLA-DQA2	10
GO:0002501	peptide antigen assembly with MHC protein complex	10/1151	20/18903	7.1011e-08	1.56457e-06	1.00512e-06	HLA-DOA/HLA-DPB1/HLA-DPA1/HLA-DRA/HLA-DRB1/HLA-DQA1/HLA-DQB2/HLA-DRB5/HLA-DQB1/HLA-DQA2	10
GO:0048754	branching morphogenesis of an epithelial tube	29/1151	157/18903	7.24027e-08	1.58872e-06	1.02064e-06	EDNRA/FGF2/FOXF1/MMP14/TCF21/CSF1/TGFBR2/NFATC4/MET/EYA1/CLIC4/GLI3/BMP4/HHIP/HOXD11/DCHS1/FGFR2/SPRY2/SPRY1/ILK/PLXND1/PBX1/COL4A1/EPHA2/BCL2/SFRP2/KDR/GPC3/EDN1	29
GO:0044344	cellular response to fibroblast growth factor stimulus	24/1151	114/18903	7.43281e-08	1.62434e-06	1.04352e-06	FGF2/FGFR1/SULF2/SFRP1/HHIP/FGFR2/NGFR/SPRY2/SPRY1/NDNF/FGF7/ZFP36L1/GATA3/FLRT3/CCN2/SULF1/ZFP36L2/CCL5/THBS1/FGFRL1/CCL2/COL1A1/ZFP36/EGR3	24
GO:0019932	second-messenger-mediated signaling	45/1151	314/18903	7.54792e-08	1.64282e-06	1.05539e-06	ATP2B4/IRAG1/SLC8A1/PRNP/LPAR1/FHL2/NPR2/RGN/PDE5A/PLN/PRKG1/RCAN2/ATP1A2/NFATC4/CAP2/LMCD1/PDE2A/AQP1/DMD/SELP/RASD2/NDNF/GSTM2/GBP1/KDR/EDNRB/CASQ2/AHR/EDN3/ATP1B1/DMPK/VCAM1/CXCR4/CD3E/CAMKK2/CD4/ACKR3/DEFB1/PTPRC/THBS1/EDN1/CASQ1/ITPR1/SELE/OR51E2	45
GO:0019886	antigen processing and presentation of exogenous peptide antigen via MHC class II	12/1151	30/18903	7.6144e-08	1.64461e-06	1.05654e-06	HLA-DOA/HLA-DPB1/HLA-DPA1/CD74/CTSS/HLA-DRA/HLA-DRB1/HLA-DQA1/HLA-DQB2/HLA-DRB5/HLA-DQB1/HLA-DQA2	12
GO:0045669	positive regulation of osteoblast differentiation	19/1151	75/18903	7.61733e-08	1.64461e-06	1.05654e-06	FGF2/FERMT2/DDR2/PDLIM7/WWTR1/GLI3/BMP4/MEF2C/TP63/ILK/SFRP2/TMEM119/IL6ST/CEBPB/IFITM1/CCN1/LTF/CEBPD/IL6	19
GO:0030239	myofibril assembly	18/1151	68/18903	8.0531e-08	1.73174e-06	1.11251e-06	LMOD1/MYH11/PGM5/FLNC/TPM1/CFL2/CSRP1/MYL9/LDB3/FHOD3/PDGFRB/PDGFRA/TMOD1/ACTC1/EDN1/CASQ1/KRT19/ACTA1	18
GO:0006979	response to oxidative stress	56/1151	434/18903	8.2691e-08	1.76841e-06	1.13607e-06	MSRB3/SCARA3/EDNRA/AXL/RBPMS/SLC8A1/PRNP/DDR2/MMP14/TPM1/MMP2/GSTP1/MET/CYGB/PDGFD/ACOX2/CRYAB/PDLIM1/FBLN5/PDGFRB/GPX3/FOXO1/SIRPA/AQP1/PDGFRA/EPAS1/GPX8/BCL2/PTGS1/PAGE4/RHOB/DUOX1/TLR4/ANXA1/GPX7/AIF1/TNFAIP3/GPX2/ETV5/KLF2/NCOA7/CAMKK2/PENK/COL1A1/SOD2/EDN1/SDC1/SOD3/PTGS2/HSPB1/IL6/SCGB1A1/FOS/NR4A3/CYP1B1/CD38	56
GO:0032946	positive regulation of mononuclear cell proliferation	28/1151	149/18903	8.28941e-08	1.76841e-06	1.13607e-06	EFNB1/CD40/CSF1/TGFBR2/MEF2C/IL27RA/HLA-E/BCL2/HLA-DPB1/TLR4/HLA-DPA1/CD74/IL6ST/ANXA1/VCAM1/GPR183/VTCN1/AIF1/CD3E/CCL5/IGF2/PYCARD/PTPRC/CORO1A/CCL19/HLA-A/IL6/CD38	28
GO:0045667	regulation of osteoblast differentiation	27/1151	141/18903	9.38607e-08	1.99445e-06	1.28129e-06	FGF2/FERMT2/DDR2/TWIST2/PDLIM7/SFRP1/WWTR1/GLI3/SNAI2/SMOC1/BMP4/MEF2C/ID3/FGFR2/TP63/ILK/SFRP2/TMEM119/CRIM1/IL6ST/IGFBP5/CEBPB/IFITM1/CCN1/LTF/CEBPD/IL6	27
GO:0001818	negative regulation of cytokine production	50/1151	371/18903	1.05347e-07	2.22971e-06	1.43242e-06	AXL/PRNP/ANGPT1/SYT11/IL33/VSIR/CX3CL1/GAS6/GSTP1/SERPINB1/INPP5D/SIRPA/SSC5D/SRGN/NDRG2/CD200/TGFB1/GBP1/GATA3/IL27RA/CD34/EPHA2/TGFB3/TGFB2/TLR4/LAPTM4B/ANXA1/CDH3/FN1/DLL1/TNFAIP3/LRRC32/RGCC/KLF2/LAPTM5/HLA-DRB1/PYCARD/BST2/PTPRC/CEACAM1/THBS1/TYROBP/HLA-F/LTF/GPNMB/IL6/SCGB1A1/ZFP36/ACP5/ORM1	50
GO:0014812	muscle cell migration	23/1151	108/18903	1.10705e-07	2.33392e-06	1.49937e-06	DDR2/LPAR1/MYOCD/TPM1/PRKG1/PDGFD/PDGFRB/MEF2C/BCL2/TLR4/PLEKHO1/PLAU/IGFBP5/ANXA1/AIF1/ITGA2/LRP1/CCL5/IGFBP3/ADAMTS1/SERPINE1/NR4A3/CYP1B1	23
GO:0061437	renal system vasculature development	12/1151	31/18903	1.17361e-07	2.45499e-06	1.57715e-06	EDNRA/ACTA2/ANGPT1/TCF21/PDGFD/BMP4/PDGFRB/AQP1/PDGFRA/CD34/PECAM1/EGR1	12
GO:0061440	kidney vasculature development	12/1151	31/18903	1.17361e-07	2.45499e-06	1.57715e-06	EDNRA/ACTA2/ANGPT1/TCF21/PDGFD/BMP4/PDGFRB/AQP1/PDGFRA/CD34/PECAM1/EGR1	12
GO:0035987	endodermal cell differentiation	15/1151	49/18903	1.18631e-07	2.47195e-06	1.58804e-06	ITGA7/MMP14/COL6A1/MMP2/ITGA5/COL4A2/COL5A1/LAMB3/FN1/LAMB1/ITGB2/DKK1/COL8A1/COL7A1/COL5A2	15
GO:0052548	regulation of endopeptidase activity	55/1151	428/18903	1.23767e-07	2.56901e-06	1.6504e-06	SERPINF1/ITIH5/PRNP/TIMP2/SERPING1/GSN/VSIR/IFI16/COL6A3/GAS6/WFDC1/SPOCK3/SERPINB1/PAPLN/CRYAB/NLRP1/AQP1/SERPINB9/CASP1/ROBO1/TIMP3/RARRES1/SOX7/NGFR/P2RX1/TP63/A2M/ANXA2/WFDC2/CCN2/TIMP1/SFRP2/C3/CRIM1/SERPINB5/LAPTM5/BIRC3/LXN/PYCARD/BST2/CPAMD8/CST7/THBS1/CSTA/CCN1/LTF/COL7A1/SERPINF2/TIMP4/S100A9/PTGS2/SERPINE1/PI3/SERPINB11/CST1	55
GO:0055074	calcium ion homeostasis	44/1151	309/18903	1.2681e-07	2.62204e-06	1.68447e-06	CAV2/EDNRA/ATP2B4/SLC24A3/FGF2/CAV1/NT5E/TRPC4/FLNA/SLC8A1/ANXA6/JPH2/RGN/PLN/CD40/CX3CL1/ATP1A2/JPH4/KCTD17/PRKCB/RASA3/DMD/P2RX1/GSTM2/BCL2/CYBA/KDR/CASQ2/S100A14/TRPV4/EDN3/ATP1B1/CXCL12/DMPK/CCL21/CCL5/PTPRC/CORO1A/EDN1/ALPL/CASQ1/ITPR1/CCL19/TGM2	44
GO:0110053	regulation of actin filament organization	41/1151	278/18903	1.29016e-07	2.65744e-06	1.70721e-06	FLNA/FERMT2/LMOD1/SYNPO2/LPAR1/KIRREL1/SYNPO/GSN/CDC42EP3/SVIL/TPM1/DAAM2/CFL2/CX3CL1/SFRP1/MET/FHOD3/FCHSD2/MYADM/CDC42EP4/TMOD1/ELN/CCN2/S1PR1/CAPG/TGFB3/KANK1/ID1/HCLS1/PIK3R1/CXCL12/CCL21/RGCC/PYCARD/GMFG/CORO1A/MYOC/RHPN1/SERPINF2/TMSB15A/CDC42EP5	41
GO:0003206	cardiac chamber morphogenesis	25/1151	126/18903	1.35914e-07	2.77823e-06	1.78481e-06	EDNRA/TGFBR3/FOXF1/FHL2/ISL1/FOXC1/TPM1/TGFBR2/SMARCD3/NRP2/BMP4/MEF2C/ROBO1/FGFR2/TGFB1/GATA3/TGFB2/SFRP2/HEG1/HEYL/CCN1/ADAMTS1/FGFRL1/SEMA3C/TNNC1	25
GO:0003231	cardiac ventricle development	25/1151	126/18903	1.35914e-07	2.77823e-06	1.78481e-06	EDNRA/TGFBR3/FOXF1/MYOCD/ISL1/FOXC1/TPM1/LMO4/TGFBR2/SMARCD3/PDE2A/BMP4/MEF2C/ROBO1/FGFR2/TGFB1/GATA3/TGFB2/SFRP2/HEG1/HEYL/CCN1/FGFRL1/SEMA3C/TNNC1	25
GO:0002443	leukocyte mediated immunity	58/1151	463/18903	1.36454e-07	2.77869e-06	1.78511e-06	FOXF1/SERPING1/C1S/CD40/CLU/C1R/MR1/C7/INPP5D/PTGDS/SERPINB9/CFI/TLR3/HLA-DOA/TGFB1/RFTN1/GATA3/TNFRSF1B/KIT/IL27RA/HLA-E/C3/HLA-DPB1/TLR4/HLA-DPA1/CD74/AHR/ARID5A/HLA-DRA/KLRB1/IL7R/C1QA/ITGB2/C1QC/HLA-DRB1/RAC2/CXCL6/BST2/C1QB/HLA-DQA1/PTPRC/CEACAM1/CORO1A/CD2/TYROBP/HLA-F/HLA-DQB2/HLA-DRB5/HLA-DQB1/HLA-A/IL6/HLA-DQA2/CD177/NR4A3/IGLL5/AZGP1/SPON2/CHGA	58
GO:0001935	endothelial cell proliferation	33/1151	199/18903	1.37771e-07	2.79493e-06	1.79553e-06	CAV2/FGF2/CAV1/VSTM4/MMP14/FGFR1/ALDH1A2/NRP2/BMP4/MEF2C/ECM1/NGFR/ACVRL1/FGF7/MMRN2/CD34/LOXL2/EPHA2/SULF1/CYBA/SPARC/KDR/PRKCA/CXCL12/ATOH8/PROK1/RGCC/JCAD/IGF2/THBS1/CCL2/ANG/EGR3	33
GO:0060070	canonical Wnt signaling pathway	44/1151	310/18903	1.39291e-07	2.81515e-06	1.80853e-06	EDNRA/RBMS3/FGF2/TCF7L1/CAV1/FZD7/ADGRA2/DKK3/ISL1/DACT3/DAAM2/GPRC5B/IGFBP4/DACT1/PLPP3/SFRP1/MCC/WWTR1/RARG/RSPO3/GLI3/SNAI2/FOXO1/FGFR2/SOX7/ILK/TGFB1/GATA3/KANK1/DIXDC1/SFRP2/LGR6/IGFBP6/EDNRB/PLEKHA4/CDH3/GPC3/FRZB/DKK1/FERMT1/COL1A1/EDN1/SDC1/EGR1	44
GO:0003208	cardiac ventricle morphogenesis	18/1151	71/18903	1.65066e-07	3.32357e-06	2.13515e-06	EDNRA/TGFBR3/FOXF1/ISL1/FOXC1/TPM1/TGFBR2/SMARCD3/MEF2C/FGFR2/TGFB1/GATA3/TGFB2/SFRP2/HEG1/HEYL/SEMA3C/TNNC1	18
GO:0008360	regulation of cell shape	28/1151	154/18903	1.70975e-07	3.42971e-06	2.20334e-06	PDPN/FERMT2/LPAR1/ITGA7/CDC42EP3/TPM1/RND3/MSN/RND2/RHOJ/CSF1R/CDC42EP4/FBLIM1/PLXND1/KIT/RHOB/KDR/PLEKHO1/ANXA1/FN1/HPN/ITGB2/RAC2/CORO1A/RAC3/CCL2/COCH/CDC42EP5	28
GO:0070588	calcium ion transmembrane transport	47/1151	345/18903	1.83419e-07	3.66565e-06	2.35491e-06	EDNRA/ATP2B4/SLC24A3/FGF2/CAV1/TRPC4/FLNA/CACHD1/SLC8A1/ANXA6/PRNP/JPH2/RGN/PLN/CX3CL1/ANO6/NCS1/GAS6/ATP1A2/JPH4/RASA3/DMD/STAC/GEM/P2RX1/GSTM2/ANXA2/CCN2/BCL2/CYBA/STAC2/EDNRB/CASQ2/TRPV4/CACNA1H/ATP1B1/CCL21/RAMP3/AHNAK/RRAD/PTPRC/CORO1A/EDN1/CASQ1/ITPR1/CCL19/CACNG4	47
GO:0030510	regulation of BMP signaling pathway	23/1151	111/18903	1.87731e-07	3.73794e-06	2.40135e-06	CHRDL1/ZNF423/SFRP1/FST/BMP4/FBN1/HTRA1/ACVRL1/ILK/RBPMS2/SPART/SULF1/ITGA3/CHRDL2/SFRP2/KDR/CRIM1/HTRA3/GPC3/DKK1/CCN1/NBL1/DLX1	23
GO:0030856	regulation of epithelial cell differentiation	29/1151	164/18903	1.92601e-07	3.82075e-06	2.45455e-06	FGF2/CAV1/FOXC1/VCL/ZEB1/WWTR1/FST/SPRED1/BMP4/SPRY2/SPRY1/ACVRL1/TP63/ZFP36L1/GATA3/S1PR3/ID1/ATOH8/DLL1/CLDN5/FRZB/CEBPB/APOLD1/CEACAM1/AQP3/ZFP36/SERPINE1/PLAAT4/ALOX15B	29
GO:0060562	epithelial tube morphogenesis	46/1151	335/18903	1.95898e-07	3.87187e-06	2.48739e-06	EDNRA/FGF2/ASB2/FOXF1/MMP14/TCF21/LMO4/CSF1/SFRP1/TGFBR2/NFATC4/MET/RARG/EYA1/CLIC4/NTN1/GLI3/BMP4/HHIP/HOXD11/DCHS1/MEF2C/FGFR2/CSF1R/SPRY2/SPRY1/ACVRL1/ILK/PLXND1/PBX1/TGFB1/GATA3/MMRN2/COL4A1/EPHA2/TGFB2/BCL2/RHOB/SFRP2/KDR/NR3C1/GPC3/DLL1/CXCR4/VANGL2/EDN1	46
GO:0050671	positive regulation of lymphocyte proliferation	27/1151	146/18903	1.97598e-07	3.89116e-06	2.49979e-06	EFNB1/CD40/TGFBR2/MEF2C/IL27RA/HLA-E/BCL2/HLA-DPB1/TLR4/HLA-DPA1/CD74/IL6ST/ANXA1/VCAM1/GPR183/VTCN1/AIF1/CD3E/CCL5/IGF2/PYCARD/PTPRC/CORO1A/CCL19/HLA-A/IL6/CD38	27
GO:0014909	smooth muscle cell migration	21/1151	95/18903	2.00867e-07	3.94109e-06	2.53186e-06	DDR2/LPAR1/MYOCD/TPM1/PRKG1/PDGFD/PDGFRB/MEF2C/BCL2/TLR4/PLAU/IGFBP5/AIF1/ITGA2/LRP1/CCL5/IGFBP3/ADAMTS1/SERPINE1/NR4A3/CYP1B1	21
GO:0042098	T cell proliferation	34/1151	212/18903	2.04174e-07	3.99142e-06	2.56419e-06	PRNP/EFNB1/PDE5A/VSIR/MSN/TGFBR2/BMP4/ELF4/TNFRSF1B/LGALS3/IL27RA/HLA-E/HLA-DPB1/HLA-DPA1/IL6ST/ANXA1/VCAM1/VTCN1/AIF1/LRRC32/CEBPB/CD3E/CCL5/IGF2/HLA-DRB1/RAC2/PYCARD/PTPRC/CORO1A/GPNMB/CCL19/HLA-A/IL6/SCGB1A1	34
GO:0006937	regulation of muscle contraction	30/1151	174/18903	2.11667e-07	4.1229e-06	2.64866e-06	CAV1/PPP1R12B/SLC8A1/ANXA6/MYOCD/PDE5A/TPM1/PLN/KCNMA1/PRKG1/CNN1/MYL9/ATP1A2/DMD/P2RX1/GSTM2/KIT/CCN2/CASQ2/TRPV4/ATP1B1/DMPK/ITGA2/CALCRL/ADRA2C/EDN1/CASQ1/PTGS2/TNNC1/CHGA	30
GO:0030111	regulation of Wnt signaling pathway	46/1151	336/18903	2.13922e-07	4.13281e-06	2.65503e-06	RBMS3/FGF2/TCF7L1/CAV1/FZD7/ADGRA2/DKK3/ISL1/DACT3/DAAM2/GPRC5B/IGFBP4/SULF2/DACT1/PLPP3/SFRP1/MCC/NFATC4/WWTR1/RSPO3/GLI3/SNAI2/FOXO1/MDFIC/FGFR2/SOX7/ILK/TGFB1/KANK1/SULF1/ITGA3/DIXDC1/SFRP2/LGR6/IGFBP6/PLEKHA4/CDH3/GPC3/TNFAIP3/FRZB/LRP1/DKK1/WIF1/FERMT1/COL1A1/EGR1	46
GO:0030850	prostate gland development	15/1151	51/18903	2.13963e-07	4.13281e-06	2.65503e-06	SERPINF1/MMP2/HOXD13/SFRP1/RARG/TNC/GLI3/BMP4/FGFR2/ID4/TP63/SULF1/ANXA1/SERPINB5/ALOX15B	15
GO:0032967	positive regulation of collagen biosynthetic process	11/1151	27/18903	2.14482e-07	4.13281e-06	2.65503e-06	DDR2/VIM/BMP4/PDGFRB/TGFB1/CCN2/TGFB3/RUNX1/ITGA2/RGCC/SERPINF2	11
GO:1903522	regulation of blood circulation	39/1151	263/18903	2.24988e-07	4.31978e-06	2.77514e-06	EDNRA/ATP2B4/GJA1/CAV1/FLNA/SLC8A1/ISL1/PDE5A/TPM1/PLN/ABCC9/MMP2/POPDC2/GJC1/ATP1A2/ATP1B2/HSPB7/DES/CELF2/KCNH2/EPAS1/DMD/P2RX1/GSTM2/CCN2/TGFB2/ADRA1D/EDNRB/CASQ2/CACNA1H/EDN3/ATP1B1/HOPX/DMPK/ADRA2C/EDN1/PTGS2/CD38/CHGA	39
GO:0097305	response to alcohol	38/1151	253/18903	2.29835e-07	4.39713e-06	2.82483e-06	ADCY5/KCNMB1/TGFBR3/PTGER2/CES1/SFRP1/ADCY3/TGFBR2/GNG2/SLC2A4/EFNA5/IGFBP7/CTSK/FGFR2/TGFB1/A2M/GATA3/CYBA/SCNN1A/AHR/MAOB/VCAM1/CD14/CCL21/CLDN5/CFTR/KLF2/PENK/CYBB/CLDN1/SOD2/CCL19/SGK1/CLDN7/SCNN1G/FOS/CYP1B1/FOSB	38
GO:0008016	regulation of heart contraction	34/1151	214/18903	2.56689e-07	4.89347e-06	3.14369e-06	EDNRA/ATP2B4/GJA1/CAV1/FLNA/SLC8A1/ISL1/PDE5A/TPM1/PLN/ABCC9/POPDC2/GJC1/ATP1A2/ATP1B2/HSPB7/DES/CELF2/KCNH2/EPAS1/DMD/GSTM2/CCN2/TGFB2/ADRA1D/EDNRB/CASQ2/CACNA1H/EDN3/ATP1B1/HOPX/DMPK/EDN1/CHGA	34
GO:0048566	embryonic digestive tract development	12/1151	33/18903	2.63346e-07	5.00264e-06	3.21383e-06	FOXF1/TCF21/RARB/ALDH1A2/GLI3/RARRES2/PDGFRA/FGFR2/RBPMS2/TGFB2/FOXF2/ID2	12
GO:1901655	cellular response to ketone	22/1151	105/18903	2.81192e-07	5.32284e-06	3.41953e-06	ADCY5/SERPINF1/PTGER2/MSN/GAS6/SFRP1/ADCY3/GNG2/EFNA5/AQP1/FBXO32/NR3C1/SCNN1A/AHR/CFTR/KLF2/POSTN/DDIT4/SGK1/SCNN1G/FOS/CYP1B1	22
GO:0003205	cardiac chamber development	29/1151	167/18903	2.87179e-07	5.4171e-06	3.48009e-06	EDNRA/TGFBR3/FOXF1/MYOCD/FHL2/ISL1/FOXC1/TPM1/LMO4/TGFBR2/SMARCD3/NRP2/PDE2A/BMP4/MEF2C/ROBO1/FGFR2/PLXND1/TGFB1/GATA3/TGFB2/SFRP2/HEG1/HEYL/CCN1/ADAMTS1/FGFRL1/SEMA3C/TNNC1	29
GO:0002763	positive regulation of myeloid leukocyte differentiation	16/1151	59/18903	2.93186e-07	5.50079e-06	3.53385e-06	ROR2/CSF1/IL34/TGFB1/ZFP36L1/RUNX1/CD74/PRKCA/HCLS1/EVI2B/CD4/HLA-DRB1/KLF10/TYROBP/ID2/FOS	16
GO:0046849	bone remodeling	20/1151	89/18903	2.93662e-07	5.50079e-06	3.53385e-06	GJA1/MITF/LEPR/SFRP1/INPP5D/CTSK/CSF1R/TGFB1/S1PR1/EPHA2/LTBP3/TGFB3/TMEM119/PDK4/PRKCA/TNFAIP3/PTN/IL6/ACP5/CD38	20
GO:0010595	positive regulation of endothelial cell migration	25/1151	131/18903	2.97674e-07	5.55659e-06	3.5697e-06	FGF2/ADGRA2/ANGPT1/FGFR1/CD40/PLPP3/RHOJ/MET/NRP2/BMP4/TGFB1/GATA3/RHOB/SPARC/KDR/ETS1/ANXA1/PRKCA/ATOH8/RRAS/JCAD/THBS1/EDN1/PTGS2/HSPB1	25
GO:0050730	regulation of peptidyl-tyrosine phosphorylation	39/1151	266/18903	3.03771e-07	5.65077e-06	3.63021e-06	CAV1/PRNP/PDGFC/CTF1/ANGPT1/ISL1/CNTN1/GPRC5B/CD40/CSPG4/GAS6/AFAP1L2/PLPP3/ITGA5/SFRP1/PDGFD/EFNA5/ARHGEF2/GFRA1/IL34/CSF1R/FGF7/TGFB1/KIT/MVP/SFRP2/PECAM1/CD74/IL6ST/HCLS1/ENPP2/CD3E/CCL5/SOCS3/CD4/ITGB2/IGF2/PTPRC/IL6	39
GO:0045664	regulation of neuron differentiation	32/1151	196/18903	3.0579e-07	5.66871e-06	3.64173e-06	MEIS1/FGF2/ISL1/FGFR1/DPYSL2/GPRC5B/ZEB1/FEZ1/SFRP1/EYA1/ARHGEF2/GLI3/BMP4/MEF2C/MAP1B/PCP4/ID4/PBX1/BCL2/DIXDC1/SFRP2/DUOXA1/EDNRB/CXCL12/DLL1/HEYL/DKK1/RAC3/NBL1/ADRA2C/ID2/DLX1	32
GO:0007411	axon guidance	36/1151	236/18903	3.22808e-07	5.95073e-06	3.8229e-06	EDNRA/NEXN/PALLD/ISL1/ARHGEF25/EFNB1/CNTN1/DPYSL2/BOC/FEZ1/EPHA3/NFASC/EFNA5/NTN1/GLI3/NRP2/ROBO1/CSF1R/NCAM1/LAMA2/NGFR/PLXND1/UNC5B/GATA3/FLRT3/EPHA2/LGR6/EDN3/CXCL12/RAC2/LAMB2/EPHB6/EDN1/SEMA3C/EGR2/VSTM2L	36
GO:0035924	cellular response to vascular endothelial growth factor stimulus	18/1151	74/18903	3.24323e-07	5.95073e-06	3.8229e-06	ATP2B4/ADGRA2/FOXC1/NRP2/GAS1/DCN/PDGFRB/PDGFRA/ROBO1/SPRY2/KDR/ANXA1/VCAM1/DLL1/JCAD/HSPB1/EGR3/MT1G	18
GO:0045123	cellular extravasation	18/1151	74/18903	3.24323e-07	5.95073e-06	3.8229e-06	JAM2/ITGA1/CX3CL1/PDGFD/SIRPA/JAM3/SELP/CHST2/IL27RA/PECAM1/CXCL12/VCAM1/CCL21/SELPLG/PLVAP/CCL2/SELE/CD177	18
GO:0045766	positive regulation of angiogenesis	31/1151	187/18903	3.298e-07	6.01018e-06	3.8611e-06	FGF2/EMILIN1/PTGIS/ISL1/CD40/HSPB6/ITGA5/TGFBR2/PRKCB/AQP1/ECM1/TLR3/ACVRL1/CD34/RHOB/SFRP2/RUNX1/C3/ITGB8/KDR/ETS1/PRKCA/RRAS/DLL1/CXCR4/JCAD/CYBB/THBS1/HSPB1/SERPINE1/CYP1B1	31
GO:1904018	positive regulation of vasculature development	31/1151	187/18903	3.298e-07	6.01018e-06	3.8611e-06	FGF2/EMILIN1/PTGIS/ISL1/CD40/HSPB6/ITGA5/TGFBR2/PRKCB/AQP1/ECM1/TLR3/ACVRL1/CD34/RHOB/SFRP2/RUNX1/C3/ITGB8/KDR/ETS1/PRKCA/RRAS/DLL1/CXCR4/JCAD/CYBB/THBS1/HSPB1/SERPINE1/CYP1B1	31
GO:0060512	prostate gland morphogenesis	11/1151	28/18903	3.33844e-07	6.06333e-06	3.89525e-06	MMP2/HOXD13/SFRP1/RARG/TNC/BMP4/FGFR2/ID4/TP63/SULF1/SERPINB5	11
GO:0034329	cell junction assembly	54/1151	430/18903	3.40174e-07	6.15749e-06	3.95574e-06	GJA1/CAV1/FERMT2/SORBS1/MMP14/VCL/CLDN11/ACTN1/CORO1C/NLGN3/GJC1/ITGA5/EPHA3/SFRP1/GPM6B/COL16A1/EFNA5/DST/FAM107A/NTN1/CNTNAP1/SNAI2/ITGB4/TLN1/DCHS1/MEF2C/MAP1B/JAM3/AJUBA/ACVRL1/PLXND1/TRIP6/COL17A1/FLRT3/EPHA2/CDH11/BCL2/PECAM1/KDR/SLITRK6/TRPV4/PRKCA/HEG1/HOPX/FN1/ITGA2/CLDN5/DKK1/THBS1/AMIGO2/MYOC/CLDN1/CLDN7/THBS2	54
GO:0006959	humoral immune response	44/1151	320/18903	3.46108e-07	6.24388e-06	4.01123e-06	SERPING1/CFH/C1S/CLU/C1R/MASP1/C7/RARRES2/MFAP4/MEF2C/CFI/A2M/GATA3/WFDC2/HLA-E/BCL2/RNASE6/C3/GPR183/RGCC/C1QA/C1QC/HLA-DRB1/CXCL6/C1QB/DEFB1/CFD/PTPRC/LTF/CCL2/CFB/JCHAIN/CXCL1/S100A9/HLA-DQB1/HLA-A/CXCL2/ANG/LYZ/IL6/IGLL5/PI3/SPON2/PGC	44
GO:0030003	cellular cation homeostasis	60/1151	499/18903	3.47767e-07	6.25283e-06	4.01698e-06	CAV2/EDNRA/ATP2B4/SLC24A3/FGF2/CAV1/TRPC4/FLNA/HEPH/SLC8A1/ANXA6/PRNP/JPH2/RGN/PLN/KCNMA1/CD40/CX3CL1/ATP1A2/JPH4/ATP1B2/RAB38/KCTD17/CLIC4/PRKCB/RASA3/DMD/P2RX1/GSTM2/SLC40A1/SLC22A17/BCL2/CYBA/CASQ2/SCNN1A/TRPV4/EDN3/ATP1B1/CXCL12/DMPK/CCL21/CFTR/CCL5/CYBRD1/PTPRC/CORO1A/CP/EDN1/CASQ1/ITPR1/S100A9/CCL19/MT1A/LCN2/MT1X/SCNN1G/TGM2/MT1M/MT1E/MT1G	60
GO:0071772	response to BMP	30/1151	178/18903	3.52372e-07	6.29353e-06	4.04313e-06	TGFBR3/CHRDL1/ZNF423/SFRP1/FST/BMP4/FBN1/HTRA1/ACVRL1/ILK/TGFB1/GATA3/RBPMS2/SPART/TGFB3/SULF1/TGFB2/ITGA3/CHRDL2/SFRP2/KDR/CRIM1/HTRA3/GPC3/HEYL/DKK1/CCN1/NBL1/EGR1/DLX1	30
GO:0071773	cellular response to BMP stimulus	30/1151	178/18903	3.52372e-07	6.29353e-06	4.04313e-06	TGFBR3/CHRDL1/ZNF423/SFRP1/FST/BMP4/FBN1/HTRA1/ACVRL1/ILK/TGFB1/GATA3/RBPMS2/SPART/TGFB3/SULF1/TGFB2/ITGA3/CHRDL2/SFRP2/KDR/CRIM1/HTRA3/GPC3/HEYL/DKK1/CCN1/NBL1/EGR1/DLX1	30
GO:0097485	neuron projection guidance	36/1151	237/18903	3.58797e-07	6.38707e-06	4.10322e-06	EDNRA/NEXN/PALLD/ISL1/ARHGEF25/EFNB1/CNTN1/DPYSL2/BOC/FEZ1/EPHA3/NFASC/EFNA5/NTN1/GLI3/NRP2/ROBO1/CSF1R/NCAM1/LAMA2/NGFR/PLXND1/UNC5B/GATA3/FLRT3/EPHA2/LGR6/EDN3/CXCL12/RAC2/LAMB2/EPHB6/EDN1/SEMA3C/EGR2/VSTM2L	36
GO:0002460	adaptive immune response based on somatic recombination of immune receptors built from immunoglobulin superfamily domains	49/1151	375/18903	3.63815e-07	6.45502e-06	4.14688e-06	SERPING1/IL33/C1S/CD40/CLU/C1R/MR1/C7/INPP5D/MEF2C/CFI/HLA-DOA/TGFB1/RFTN1/GATA3/TNFRSF1B/IL27RA/HLA-E/C3/HLA-DPB1/PLA2G4A/TLR4/HLA-DPA1/CD74/AHR/ANXA1/ARID5A/HLA-DRA/TNFAIP3/IL7R/C1QA/CD4/C1QC/HLA-DRB1/C1QB/HLA-DQA1/PTPRC/CEACAM1/HLA-F/HLA-DQB2/HLA-DRB5/CCL19/HLA-DQB1/HLA-A/IL6/HLA-DQA2/IGLL5/JUNB/AZGP1	49
GO:0150146	cell junction disassembly	10/1151	23/18903	3.71525e-07	6.57012e-06	4.22082e-06	CX3CL1/SNAI2/MAPRE2/TGFB3/C3/PIK3R1/C1QA/C1QC/DKK1/C1QB	10
GO:0071622	regulation of granulocyte chemotaxis	15/1151	53/18903	3.73791e-07	6.58852e-06	4.23264e-06	CSF1/RARRES2/IL34/JAM3/CSF1R/CD74/S100A14/TRPV4/CCL21/CCL5/RAC2/THBS1/CXCL17/EDN1/CCL19	15
GO:0048246	macrophage chemotaxis	13/1151	40/18903	3.79464e-07	6.66667e-06	4.28284e-06	MMP2/CSF1/RARRES2/IL34/CSF1R/LGALS3/EDNRB/TRPV4/CCL5/THBS1/CXCL17/CCL2/SAA1	13
GO:0002695	negative regulation of leukocyte activation	32/1151	198/18903	3.87044e-07	6.76613e-06	4.34674e-06	AXL/PRNP/FOXF1/SYT11/PDE5A/VSIR/CX3CL1/SFRP1/GLI3/INPP5D/BMP4/CD200/FGL2/RASSF5/LGALS3/RUNX1/CD74/ANXA1/VTCN1/TNFAIP3/LRRC32/CEBPB/LAPTM5/HLA-DRB1/CST7/PTPRC/CEACAM1/TYROBP/HLA-F/GPNMB/ID2/SCGB1A1	32
GO:0051017	actin filament bundle assembly	28/1151	160/18903	3.88901e-07	6.76613e-06	4.34674e-06	FLNA/FERMT2/DPYSL3/SORBS1/SYNPO2/LPAR1/SYNPO/TPM1/CX3CL1/CALD1/ACTN1/PLS3/SFRP1/MET/FAM107A/PDLIM1/ZYX/ELN/CCN2/S1PR1/TGFB3/ID1/PIK3R1/AIF1/RGCC/MYOC/RHPN1/SERPINF2	28
GO:0051147	regulation of muscle cell differentiation	28/1151	160/18903	3.88901e-07	6.76613e-06	4.34674e-06	FZD7/EFEMP2/MYOCD/MMP14/ZEB1/NID1/PLPP7/BMP4/RBM38/MEF2C/FGFR2/LAMA2/TGFB1/KIT/RBPMS2/BCL2/TMEM119/HOPX/DMPK/DLL1/LAMB1/IGF2/LAMB2/DKK1/PI16/SOD2/EDN1/ID2	28
GO:0009410	response to xenobiotic stimulus	54/1151	432/18903	3.94785e-07	6.84633e-06	4.39827e-06	SLC8A1/PRNP/AOX1/ACACB/MMP2/SRD5A2/GAS6/GSTP1/SFRP1/TGFBR2/CBX7/GSTM4/KCNH2/PDE4A/MEF2C/MAP1B/ABCB1/PAM/TLR3/GSTM2/GATA3/TGFB2/BCL2/ITGA3/CYBA/SFRP2/GSTM3/FMO2/AHR/ABCC3/CDH3/MAOB/ITGA2/CXCR4/CYP3A5/CD69/DUSP6/CYBB/THBS1/COL1A1/TIMP4/SOD2/EDN1/SEMA3C/PTGS2/KCNK3/SCGB1A1/NNMT/FOS/GSTA1/CYP1B1/CD38/FOSB/ACSM1	54
GO:0060840	artery development	22/1151	107/18903	3.97413e-07	6.86976e-06	4.41331e-06	EDNRA/MYLK/EFEMP2/PRRX1/FOXF1/MYOCD/FOXC1/EYA1/GLI3/PDE2A/BMP4/PDGFRB/ROBO1/NGFR/ACVRL1/PLXND1/LOXL1/TGFB2/COL3A1/LRP1/EDN1/EGR2	22
GO:0043491	protein kinase B signaling	34/1151	218/18903	4.01502e-07	6.91819e-06	4.44443e-06	FGF2/AXL/FERMT2/ANGPT1/FGFR1/CD40/CX3CL1/C1QTNF1/GAS6/MET/TNFAIP8L3/F10/SPRY2/RASD2/ILK/TGFB1/ZFP36L1/GATA3/EPHA2/CAVIN3/KDR/IGFBP5/HCLS1/RRAS/CCL21/CCL5/PHLDA3/IGF2/RAMP3/THBS1/RCN3/MYOC/CCL2/CCL19	34
GO:0072009	nephron epithelium development	23/1151	116/18903	4.32404e-07	7.42685e-06	4.77121e-06	EDNRA/FGF2/FOXC1/TCF21/WWTR1/EYA1/GLI3/BMP4/HOXD11/AQP1/DCHS1/MEF2C/ILK/PBX1/GATA3/CD34/BCL2/PECAM1/EDNRB/GPC3/DLL1/HEYL/LAMB2	23
GO:0003014	renal system process	24/1151	125/18903	4.55155e-07	7.79272e-06	5.00625e-06	EDNRA/KIRREL1/GSN/MCAM/KCNMA1/GAS6/SULF2/BMP4/AKR1B1/AQP1/ABCG2/CD34/SULF1/BCL2/ITGA3/CYBA/EDNRB/SERPINF2/EDN1/JCHAIN/AQP3/SGK1/SLC15A2/OR51E2	24
GO:0062197	cellular response to chemical stress	46/1151	345/18903	4.62659e-07	7.89605e-06	5.07263e-06	EDNRA/CAV1/AXL/MYLK/DDR2/TPM1/MMP2/MET/SLC2A4/PDGFD/ARHGEF2/FBLN5/EFHD1/AKR1B1/FOXO1/SIRPA/AQP1/PDGFRA/CASP1/EPAS1/GPX8/ZFP36L1/BCL2/PAGE4/RHOB/TLR4/TRPV4/ANXA1/GPX7/AIF1/TNFAIP3/ETV5/KLF2/NCOA7/CAMKK2/PYCARD/PENK/SOD2/EDN1/SOD3/PTGS2/HSPB1/IL6/FOS/NR4A3/CYP1B1	46
GO:0043588	skin development	42/1151	302/18903	4.67268e-07	7.94946e-06	5.10695e-06	PALLD/FOXC1/MET/FST/CLIC4/LDB2/ITGB4/FGFR2/COL5A1/NGFR/TP63/FGF7/ZFP36L1/EPHA2/ITGB6/TGFB2/BCL2/COL1A2/ITGA3/IGFBP5/ANXA1/KRT5/COL3A1/CDH3/GJB3/DLL1/ITGA2/FOSL2/DKK1/KRT7/FERMT1/FOXQ1/CSTA/KRT17/CLDN1/KRT4/COL1A1/COL5A2/AQP3/ZFP36/PLAAT4/ALOX15B	42
GO:0035633	maintenance of blood-brain barrier	12/1151	35/18903	5.52774e-07	9.37448e-06	6.02242e-06	GJA1/ANGPT1/JAM2/VCL/JAM3/DMD/LAMA2/PECAM1/CLDN5/CLDN1/PTGS2/IL6	12
GO:0150116	regulation of cell-substrate junction organization	17/1151	69/18903	5.64165e-07	9.53758e-06	6.1272e-06	FERMT2/MMP14/VCL/CORO1C/EPHA3/SFRP1/GPM6B/COL16A1/EFNA5/FAM107A/TLN1/MAPRE2/ACVRL1/KDR/PIK3R1/THBS1/MYOC	17
GO:0061298	retina vasculature development in camera-type eye	9/1151	19/18903	5.90715e-07	9.95512e-06	6.39543e-06	VSTM4/RHOJ/CLIC4/PDGFRB/PDGFRA/ACVRL1/NDP/COL4A1/CYP1B1	9
GO:0002718	regulation of cytokine production involved in immune response	23/1151	118/18903	5.94709e-07	9.99111e-06	6.41855e-06	AXL/ANGPT1/GPRC5B/TLR3/TGFB1/GATA3/TNFRSF1B/KIT/HLA-E/TGFB3/TGFB2/TLR4/CD74/ARID5A/LAPTM5/PYCARD/BST2/HLA-F/HLA-A/IL6/NR4A3/ACP5/SPON2	23
GO:1903036	positive regulation of response to wounding	18/1151	77/18903	6.13212e-07	1.02563e-05	6.58891e-06	FLNA/MYLK/FERMT2/EMILIN1/DDR2/ANO6/KANK1/DUOX1/PLAU/ANXA1/THBD/CXCR4/PTN/THBS1/FERMT1/CLDN1/SERPINF2/SERPINE1	18
GO:0090303	positive regulation of wound healing	16/1151	62/18903	6.14309e-07	1.02563e-05	6.58891e-06	MYLK/FERMT2/EMILIN1/DDR2/ANO6/KANK1/DUOX1/PLAU/ANXA1/THBD/CXCR4/THBS1/FERMT1/CLDN1/SERPINF2/SERPINE1	16
GO:0006874	cellular calcium ion homeostasis	40/1151	284/18903	6.26194e-07	1.04223e-05	6.69559e-06	CAV2/EDNRA/ATP2B4/SLC24A3/FGF2/CAV1/TRPC4/FLNA/SLC8A1/ANXA6/JPH2/RGN/PLN/CD40/CX3CL1/ATP1A2/JPH4/KCTD17/PRKCB/RASA3/DMD/P2RX1/GSTM2/BCL2/CYBA/CASQ2/TRPV4/EDN3/ATP1B1/CXCL12/DMPK/CCL21/CCL5/PTPRC/CORO1A/EDN1/CASQ1/ITPR1/CCL19/TGM2	40
GO:0061572	actin filament bundle organization	28/1151	164/18903	6.55043e-07	1.08689e-05	6.98244e-06	FLNA/FERMT2/DPYSL3/SORBS1/SYNPO2/LPAR1/SYNPO/TPM1/CX3CL1/CALD1/ACTN1/PLS3/SFRP1/MET/FAM107A/PDLIM1/ZYX/ELN/CCN2/S1PR1/TGFB3/ID1/PIK3R1/AIF1/RGCC/MYOC/RHPN1/SERPINF2	28
GO:0048608	reproductive structure development	42/1151	306/18903	6.67792e-07	1.10463e-05	7.09644e-06	AXL/SERPINF1/MYOCD/MMP14/FOXC1/ROR2/MMP2/TCF21/SRD5A2/HOXD13/SFRP1/SOX15/RARG/TNC/FST/GFRA1/GLI3/BMP4/PDGFRB/PDGFRA/FGFR2/ID4/TLR3/TP63/A2M/GATA3/KIT/SULF1/TGFB2/BCL2/SFRP2/C3/KDR/ANXA1/SERPINB5/CEBPB/FOXF2/ADAMTS1/SDC1/ANG/CYP1B1/ALOX15B	42
GO:0050731	positive regulation of peptidyl-tyrosine phosphorylation	31/1151	193/18903	6.72372e-07	1.10879e-05	7.12319e-06	PRNP/CTF1/ANGPT1/ISL1/CNTN1/GPRC5B/CD40/CSPG4/GAS6/AFAP1L2/PLPP3/ITGA5/EFNA5/ARHGEF2/GFRA1/IL34/CSF1R/FGF7/TGFB1/KIT/PECAM1/CD74/IL6ST/HCLS1/ENPP2/CD3E/CCL5/CD4/IGF2/PTPRC/IL6	31
GO:0010927	cellular component assembly involved in morphogenesis	23/1151	119/18903	6.95318e-07	1.14313e-05	7.34376e-06	LMOD1/PMP22/MYH11/PGM5/FLNC/TPM1/CFL2/CNTN1/CSRP1/MYL9/LDB3/PHLDB1/FHOD3/CNTNAP1/PDGFRB/ITGB4/PDGFRA/TMOD1/ACTC1/EDN1/CASQ1/KRT19/ACTA1	23
GO:0010720	positive regulation of cell development	42/1151	307/18903	7.29198e-07	1.19517e-05	7.67811e-06	FGF2/FLNA/FERMT2/SERPINF1/IL33/PDE5A/CX3CL1/RND2/LIMS2/EFNA5/SMARCD3/NTN1/GLI3/BMP4/MYADM/MAP1B/IL34/ROBO1/ID4/ILK/PLXND1/TGFB1/TNFRSF1B/KIT/BCL2/DIXDC1/IL6ST/CXCL12/FN1/CRABP2/CXCR4/CLDN5/OLFM4/PTN/RAC3/TYROBP/MYOC/ID2/IL6/EGR2/TGM2/MME	42
GO:0045444	fat cell differentiation	36/1151	244/18903	7.36595e-07	1.20363e-05	7.73242e-06	FERMT2/CLIP3/TGFB1I1/ZNF516/SFRP1/SLC2A4/WWTR1/FABP3/SNAI2/RARRES2/JDP2/FOXO1/PDGFRA/ID4/TGFB1/ZFP36L1/CCDC3/GATA3/LAMB3/ZFP36L2/SFRP2/TRPV4/DIO2/KLF5/DLK2/FRZB/CEBPB/WIF1/SOD2/ID2/PTGS2/CEBPD/IL6/EGR2/ZFP36/NR4A3	36
GO:0030224	monocyte differentiation	12/1151	36/18903	7.83366e-07	1.27617e-05	8.19848e-06	CSF1/IFI16/INPP5D/BMP4/IL34/CSF1R/ZFP36L1/CD74/CD4/HLA-DRB1/FASN/MT1G	12
GO:0048546	digestive tract morphogenesis	14/1151	49/18903	8.04391e-07	1.30647e-05	8.39309e-06	FOXF1/TCF21/HOXD13/DACT1/SFRP1/GLI3/BMP4/PDGFRA/FGFR2/TP63/RBPMS2/BCL2/SFRP2/ID2	14
GO:0002367	cytokine production involved in immune response	23/1151	120/18903	8.11334e-07	1.30657e-05	8.39373e-06	AXL/ANGPT1/GPRC5B/TLR3/TGFB1/GATA3/TNFRSF1B/KIT/HLA-E/TGFB3/TGFB2/TLR4/CD74/ARID5A/LAPTM5/PYCARD/BST2/HLA-F/HLA-A/IL6/NR4A3/ACP5/SPON2	23
GO:0051897	positive regulation of protein kinase B signaling	23/1151	120/18903	8.11334e-07	1.30657e-05	8.39373e-06	FGF2/AXL/FERMT2/ANGPT1/FGFR1/CX3CL1/C1QTNF1/GAS6/MET/TNFAIP8L3/F10/SPRY2/RASD2/TGFB1/GATA3/IGFBP5/HCLS1/CCL21/IGF2/RAMP3/THBS1/MYOC/CCL19	23
GO:0045598	regulation of fat cell differentiation	26/1151	147/18903	8.11744e-07	1.30657e-05	8.39373e-06	FERMT2/TGFB1I1/SFRP1/WWTR1/SNAI2/RARRES2/JDP2/FOXO1/ID4/TGFB1/ZFP36L1/CCDC3/GATA3/ZFP36L2/SFRP2/TRPV4/KLF5/DLK2/FRZB/CEBPB/WIF1/SOD2/ID2/PTGS2/IL6/ZFP36	26
GO:0010718	positive regulation of epithelial to mesenchymal transition	15/1151	56/18903	8.17911e-07	1.31256e-05	8.43226e-06	PDPN/FERMT2/TGFB1I1/ISL1/FOXC1/TGFBR2/WWTR1/BMP4/TGFB1/LOXL2/TGFB3/TGFB2/RGCC/COL1A1/IL6	15
GO:2000027	regulation of animal organ morphogenesis	24/1151	129/18903	8.29397e-07	1.32703e-05	8.52522e-06	PRICKLE2/FGF2/FZD7/ROR2/CSF1/DACT1/SFRP1/RSPO3/SNAI2/BMP4/ROBO1/NGFR/SPRY1/FGF7/GATA3/CD34/NTN4/SULF1/SFRP2/PLEKHA4/GPC3/DKK1/VANGL2/EDN1	24
GO:0070167	regulation of biomineral tissue development	21/1151	103/18903	8.40279e-07	1.34046e-05	8.61145e-06	SLC8A1/DDR2/ANO6/GAS6/GPM6B/BMP4/MEF2C/ECM1/SRGN/TGFB1/S1PR1/LTBP3/TGFB3/TMEM119/OMD/MGP/CEBPB/CFTR/PTN/CCN1/LTF	21
GO:1902905	positive regulation of supramolecular fiber organization	29/1151	176/18903	8.91572e-07	1.41807e-05	9.11009e-06	EFEMP2/FERMT2/LMOD1/SYNPO2/LPAR1/KIRREL1/SYNPO/GSN/CDC42EP3/TPM1/CFL2/CX3CL1/CLU/SFRP1/MET/FCHSD2/MAP1B/CDC42EP4/CCN2/TGFB3/TRPV4/ID1/CCL21/RGCC/PYCARD/MYOC/SERPINF2/EDN1/CDC42EP5	29
GO:0061458	reproductive system development	42/1151	310/18903	9.46517e-07	1.50103e-05	9.64298e-06	AXL/SERPINF1/MYOCD/MMP14/FOXC1/ROR2/MMP2/TCF21/SRD5A2/HOXD13/SFRP1/SOX15/RARG/TNC/FST/GFRA1/GLI3/BMP4/PDGFRB/PDGFRA/FGFR2/ID4/TLR3/TP63/A2M/GATA3/KIT/SULF1/TGFB2/BCL2/SFRP2/C3/KDR/ANXA1/SERPINB5/CEBPB/FOXF2/ADAMTS1/SDC1/ANG/CYP1B1/ALOX15B	42
GO:0030509	BMP signaling pathway	28/1151	167/18903	9.55876e-07	1.50804e-05	9.68804e-06	TGFBR3/CHRDL1/ZNF423/SFRP1/FST/BMP4/FBN1/HTRA1/ACVRL1/ILK/TGFB1/RBPMS2/SPART/TGFB3/SULF1/TGFB2/ITGA3/CHRDL2/SFRP2/KDR/CRIM1/HTRA3/GPC3/DKK1/CCN1/NBL1/EGR1/DLX1	28
GO:0032612	interleukin-1 production	24/1151	130/18903	9.59355e-07	1.50804e-05	9.68804e-06	ISL1/CX3CL1/IFI16/GAS6/GSTP1/SERPINB1/NLRP1/SIRPA/CASP1/S1PR3/TLR4/ANXA1/TNFAIP3/PYCARD/CEACAM1/TYROBP/CCL19/HSPB1/EGR1/IL6/SAA1/ACP5/ORM2/ORM1	24
GO:0032652	regulation of interleukin-1 production	24/1151	130/18903	9.59355e-07	1.50804e-05	9.68804e-06	ISL1/CX3CL1/IFI16/GAS6/GSTP1/SERPINB1/NLRP1/SIRPA/CASP1/S1PR3/TLR4/ANXA1/TNFAIP3/PYCARD/CEACAM1/TYROBP/CCL19/HSPB1/EGR1/IL6/SAA1/ACP5/ORM2/ORM1	24
GO:0042554	superoxide anion generation	13/1151	43/18903	9.71878e-07	1.52327e-05	9.78589e-06	SH3PXD2B/GSTP1/SH3PXD2A/TGFB1/CYBA/DUOX1/ITGB2/CYBB/TYROBP/SOD2/EDN1/CD177/ACP5	13
GO:0071384	cellular response to corticosteroid stimulus	16/1151	64/18903	9.78275e-07	1.52884e-05	9.82166e-06	SERPINF1/ISL1/FAM107A/AQP1/ZFP36L1/FBXO32/ZFP36L2/NR3C1/SCNN1A/ANXA1/EDN1/DDIT4/SGK1/SCNN1G/ZFP36/CYP1B1	16
GO:0048705	skeletal system morphogenesis	34/1151	227/18903	1.04668e-06	1.62833e-05	1.04608e-05	ANXA6/PRRX1/MMP14/FOXC1/FGFR1/ZEB1/MMP2/RARB/SFRP1/TGFBR2/RARG/EYA1/GLI3/CHST11/BMP4/HHIP/HOXD10/MEF2C/PDGFRA/FGFR2/CCN2/LTBP3/TGFB3/COL27A1/HOXB2/TMEM119/MGP/TRPV4/COL3A1/HOXD9/LTF/COL1A1/ALPL/ACP5	34
GO:0008347	glial cell migration	15/1151	57/18903	1.04799e-06	1.62833e-05	1.04608e-05	BMERB1/MMP14/CX3CL1/CSF1/CSPG4/ATP1B2/NTN1/GLI3/TGFB2/NDN/COL3A1/RRAS/GPR183/LAMB1/CCL2	15
GO:0061082	myeloid leukocyte cytokine production	14/1151	50/18903	1.05499e-06	1.63448e-05	1.05003e-05	AXL/GPRC5B/TLR3/TGFB1/KIT/TGFB3/TGFB2/TLR4/CD74/LAPTM5/PYCARD/NR4A3/ACP5/SPON2	14
GO:0010934	macrophage cytokine production	12/1151	37/18903	1.09537e-06	1.68731e-05	1.08398e-05	AXL/GPRC5B/TLR3/TGFB1/TGFB3/TGFB2/TLR4/CD74/LAPTM5/PYCARD/ACP5/SPON2	12
GO:0010935	regulation of macrophage cytokine production	12/1151	37/18903	1.09537e-06	1.68731e-05	1.08398e-05	AXL/GPRC5B/TLR3/TGFB1/TGFB3/TGFB2/TLR4/CD74/LAPTM5/PYCARD/ACP5/SPON2	12
GO:0097205	renal filtration	11/1151	31/18903	1.11113e-06	1.7067e-05	1.09643e-05	EDNRA/KIRREL1/MCAM/GAS6/SULF2/AQP1/CD34/SULF1/ITGA3/CYBA/JCHAIN	11
GO:0014068	positive regulation of phosphatidylinositol 3-kinase signaling	18/1151	80/18903	1.11948e-06	1.71462e-05	1.10152e-05	FGF2/PDGFC/ANGPT1/FGFR1/ROR2/PDGFD/DCN/PDGFRB/PDGFRA/SELP/UNC5B/KIT/TGFB2/KDR/HCLS1/FN1/CCL5/MYOC	18
GO:0022604	regulation of cell morphogenesis	42/1151	312/18903	1.12346e-06	1.71583e-05	1.10229e-05	FLNA/PDPN/FERMT2/LPAR1/ITGA7/CDC42EP3/TPM1/RND3/FBLN1/MSN/CORO1C/RND2/LIMS2/RHOJ/EFNA5/MYADM/CSF1R/CDC42EP4/FBLIM1/ILK/PLXND1/GBP1/KIT/KANK1/RHOB/SPARC/KDR/PLEKHO1/ANXA1/FN1/ENPP2/HPN/CXCR4/ITGB2/RAC2/OLFM4/CORO1A/RAC3/MYOC/CCL2/COCH/CDC42EP5	42
GO:0110149	regulation of biomineralization	21/1151	105/18903	1.17127e-06	1.78379e-05	1.14595e-05	SLC8A1/DDR2/ANO6/GAS6/GPM6B/BMP4/MEF2C/ECM1/SRGN/TGFB1/S1PR1/LTBP3/TGFB3/TMEM119/OMD/MGP/CEBPB/CFTR/PTN/CCN1/LTF	21
GO:0032102	negative regulation of response to external stimulus	53/1151	436/18903	1.2008e-06	1.82358e-05	1.17152e-05	FGF2/NT5E/SERPINF1/PTGIS/FOXF1/ISL1/SYT11/SERPING1/CX3CL1/C1QTNF1/IFI16/PRKG1/GSTP1/WFDC1/SIRPA/HTRA1/SERPINB9/PDGFRA/ROBO1/CD200/FGL2/A2M/ANXA2/GATA3/TNFRSF1B/CD34/HLA-E/PLAU/THBD/AIF1/TNFAIP3/CALCRL/SOCS3/HLA-DRB1/CST7/PTPRC/CEACAM1/THBS1/CXCL17/HLA-F/LTF/SERPINF2/CCL2/NBL1/DUSP1/EDN1/HLA-A/SEMA3C/ZFP36/SERPINE1/SAA1/ACP5/NPY	53
GO:0003170	heart valve development	16/1151	65/18903	1.22499e-06	1.85509e-05	1.19176e-05	EMILIN1/TGFBR2/SNAI2/PDE2A/BMP4/DCHS1/MEF2C/ROBO1/TGFB1/GATA3/TNFRSF1B/ELN/TGFB2/HEYL/CCN1/FGFRL1	16
GO:0014911	positive regulation of smooth muscle cell migration	13/1151	44/18903	1.30294e-06	1.96208e-05	1.26049e-05	DDR2/LPAR1/PDGFD/PDGFRB/BCL2/TLR4/IGFBP5/AIF1/ITGA2/CCL5/ADAMTS1/NR4A3/CYP1B1	13
GO:1905521	regulation of macrophage migration	13/1151	44/18903	1.30294e-06	1.96208e-05	1.26049e-05	EMILIN1/MMP14/CX3CL1/CSF1/CNN2/RARRES2/IL34/CSF1R/CD200/TRPV4/CCL5/THBS1/CXCL17	13
GO:0033622	integrin activation	10/1151	26/18903	1.45779e-06	2.17696e-05	1.39854e-05	FERMT2/CX3CL1/COL16A1/TLN1/JAM3/SELP/FBLIM1/CXCL12/FN1/FERMT1	10
GO:0060740	prostate gland epithelium morphogenesis	10/1151	26/18903	1.45779e-06	2.17696e-05	1.39854e-05	MMP2/HOXD13/SFRP1/RARG/TNC/BMP4/FGFR2/ID4/TP63/SULF1	10
GO:1905523	positive regulation of macrophage migration	10/1151	26/18903	1.45779e-06	2.17696e-05	1.39854e-05	MMP14/CX3CL1/CSF1/RARRES2/IL34/CSF1R/TRPV4/CCL5/THBS1/CXCL17	10
GO:0072089	stem cell proliferation	23/1151	124/18903	1.47553e-06	2.19736e-05	1.41164e-05	FGF2/GJA1/FERMT2/PRRX1/NES/FBLN1/RARB/TGFBR2/RARG/GLI3/SNAI2/ABCB1/ID4/TP63/PBX1/ZFP36L1/CD34/LTBP3/SFRP2/RUNX1/KDR/PTPRC/FERMT1	23
GO:0060349	bone morphogenesis	20/1151	98/18903	1.50066e-06	2.22861e-05	1.43172e-05	ANXA6/MMP14/FOXC1/RARB/TGFBR2/RARG/GLI3/BMP4/MEF2C/FGFR2/LTBP3/TGFB3/COL27A1/TMEM119/TRPV4/COL3A1/LTF/COL1A1/ALPL/ACP5	20
GO:0006590	thyroid hormone generation	9/1151	21/18903	1.68175e-06	2.49066e-05	1.60007e-05	SLC16A2/CTSB/CTSK/GATA3/DUOX1/DUOXA1/DIO2/CPQ/HPN	9
GO:0031099	regeneration	30/1151	192/18903	1.82978e-06	2.70244e-05	1.73612e-05	AXL/FZD7/FLNA/TGFBR3/PRRX1/ISL1/RGN/MMP2/GAS6/TGFBR2/SOX15/SGCA/TNC/GLI3/MAP1B/BCL2/LGR6/RUNX1/ANXA1/CPQ/HOPX/KLF5/CXCL12/CEBPB/LAMB2/PTN/CLDN1/IL6/NNMT/NR4A3	30
GO:0021782	glial cell development	22/1151	117/18903	1.95661e-06	2.88185e-05	1.85137e-05	TSPAN2/LPAR1/CNTN1/ROR2/CLU/ANO1/CNTNAP1/VIM/ITGB4/ID4/PRDM8/ILK/MAL/TLR4/MXRA8/DLL1/C1QA/LRP1/LAMB2/MYOC/S100A9/IL6	22
GO:0030500	regulation of bone mineralization	18/1151	83/18903	1.97911e-06	2.90608e-05	1.86694e-05	SLC8A1/DDR2/ANO6/GPM6B/BMP4/MEF2C/ECM1/SRGN/TGFB1/S1PR1/LTBP3/TGFB3/TMEM119/OMD/MGP/PTN/CCN1/LTF	18
GO:0050818	regulation of coagulation	17/1151	75/18903	1.98387e-06	2.90608e-05	1.86694e-05	CAV1/EMILIN1/SERPING1/C1QTNF1/PRKG1/ANO6/PDGFRA/ANXA2/CD34/PLAU/THBD/PROCR/CEACAM1/THBS1/SERPINF2/EDN1/SERPINE1	17
GO:0098754	detoxification	26/1151	154/18903	2.02182e-06	2.95361e-05	1.89748e-05	GSTP1/CYGB/FBLN5/GPX3/ABCB1/GPX8/GSTM2/ABCG2/PTGS1/GSTM3/DUOX1/ALOX5AP/GPX7/GPX2/SOD2/S100A9/MT1A/SOD3/PTGS2/MT1X/SLC15A2/GSTA1/ALDH1A1/MT1M/MT1E/MT1G	26
GO:0030316	osteoclast differentiation	20/1151	100/18903	2.09259e-06	3.04871e-05	1.95857e-05	MITF/CSF1/SFRP1/INPP5D/SH3PXD2A/FBN1/CSF1R/TLR3/ANXA2/EPHA2/TLR4/PIK3R1/GPC3/GPR183/CEBPB/KLF10/TYROBP/LTF/FOS/JUNB	20
GO:0001656	metanephros development	19/1151	92/18903	2.26137e-06	3.2857e-05	2.11082e-05	TCF21/WWTR1/EYA1/GLI3/BMP4/PDGFRB/AKR1B1/FBN1/AQP1/PDGFRA/ID3/SPRY1/ITGA8/GATA3/CD34/BCL2/GPC3/LAMB2/EGR1	19
GO:0035272	exocrine system development	13/1151	46/18903	2.27877e-06	3.30207e-05	2.12134e-05	FOXC1/SNAI2/FGFR2/FGF7/PLXND1/TGFB1/NTN4/TGFB3/TGFB2/IGF2/TFCP2L1/SEMA3C/TGM2	13
GO:2001236	regulation of extrinsic apoptotic signaling pathway	26/1151	155/18903	2.29101e-06	3.31088e-05	2.127e-05	CAV1/FGFR1/CX3CL1/GSTP1/SFRP1/FAIM2/EYA1/ARHGEF2/SNAI2/BMP4/SRPX/TIMP3/UNC5B/LGALS3/ITM2C/BCL2/SFRP2/MAL/G0S2/TNFAIP3/PYCARD/PTPRC/THBS1/TNFRSF12A/SERPINE1/ATF3	26
GO:0072593	reactive oxygen species metabolic process	34/1151	235/18903	2.32755e-06	3.35467e-05	2.15513e-05	SH3PXD2B/GSTP1/TGFBR2/CRYAB/FBLN5/PDGFRB/SH3PXD2A/GPX3/FOXO1/TGFB1/CCN2/BCL2/CYBA/PAGE4/PDK4/DUOX1/TLR4/DUOXA1/GADD45A/MAOB/PID1/ITGB2/RAC2/CYBB/THBS1/CCN1/TYROBP/SOD2/EDN1/SOD3/DDIT4/CD177/ACP5/CYP1B1	34
GO:0016049	cell growth	57/1151	493/18903	2.38591e-06	3.42959e-05	2.20326e-05	EDNRA/GJA1/MYOCD/DACT3/MMP14/VCL/RERG/FHL1/DPYSL2/IGFBP4/RND2/NLGN3/WFDC1/LTBP4/SFRP1/TGFBR2/CRYAB/EFNA5/RARG/FAM107A/TNC/NTN1/NRP2/RASGRP2/FBLN5/IGFBP7/MAP1B/ACVRL1/TGFB1/TEAD1/FLRT3/SPART/TGFB2/BCL2/CYBA/SFRP2/NDN/IGFBP5/EDN3/CXCL12/FN1/HPN/CRABP2/CXCR4/FRZB/LAMB2/IGFBP3/BST2/SCGB3A1/PI16/CEACAM1/KRT17/EDN1/S100A9/SEMA3C/SGK1/CD38	57
GO:0010959	regulation of metal ion transport	51/1151	423/18903	2.42073e-06	3.47035e-05	2.22945e-05	ATP2B4/STOM/CAV1/FLNA/MYLK/KCNMB1/SLC8A1/PRNP/JPH2/RGN/PLN/FHL1/CNTN1/ABCC9/CX3CL1/ANO6/ATP1A2/JPH4/FXYD6/ATP1B2/KCNH2/PDGFRB/KCNAB1/DMD/STAC/GEM/P2RX1/GSTM2/LGALS3/BCL2/CYBA/STAC2/CASQ2/FXYD5/EDN3/ATP1B1/CXCL12/DMPK/CXCR4/CCL5/CD4/RAMP3/AHNAK/RRAD/CORO1A/CCL2/CASQ1/PER1/PTGS2/KCNK3/NKAIN1	51
GO:0032609	interferon-gamma production	22/1151	119/18903	2.62557e-06	3.74404e-05	2.40527e-05	AXL/PRNP/ISL1/IL33/VSIR/GAS6/SIRPA/TLR3/GATA3/IL27RA/HLA-DPB1/TLR4/HLA-DPA1/CD14/ARID5A/CD3E/LAPTM5/HLA-DRB1/PYCARD/CD2/HLA-A/SCGB1A1	22
GO:0032649	regulation of interferon-gamma production	22/1151	119/18903	2.62557e-06	3.74404e-05	2.40527e-05	AXL/PRNP/ISL1/IL33/VSIR/GAS6/SIRPA/TLR3/GATA3/IL27RA/HLA-DPB1/TLR4/HLA-DPA1/CD14/ARID5A/CD3E/LAPTM5/HLA-DRB1/PYCARD/CD2/HLA-A/SCGB1A1	22
GO:1902893	regulation of miRNA transcription	15/1151	61/18903	2.6632e-06	3.78767e-05	2.4333e-05	FGF2/MYOCD/NFATC4/BMP4/NGFR/TGFB1/GATA3/TEAD1/TGFB2/NR3C1/ETS1/KLF5/ATOH8/EGR1/FOS	15
GO:0055119	relaxation of cardiac muscle	8/1151	17/18903	2.7338e-06	3.87781e-05	2.49121e-05	SLC8A1/GSN/PDE5A/PLN/ATP1A2/GSTM2/ATP1B1/CHGA	8
GO:0034764	positive regulation of transmembrane transport	34/1151	237/18903	2.82172e-06	3.98757e-05	2.56172e-05	EDNRA/CAV1/FLNA/KCNMB1/CLIP3/SORBS1/JPH2/RGN/CX3CL1/ANO6/NLGN3/ATP1B2/KCNH2/ABCB1/DMD/STAC/P2RX1/GSTM2/C3/STAC2/EDN3/ATP1B1/PIK3R1/GPC3/CTSS/CFTR/IRS1/RAMP3/CCL2/EDN1/CASQ1/KCNK3/CACNG4/NR4A3	34
GO:0043405	regulation of MAP kinase activity	29/1151	186/18903	2.82601e-06	3.98757e-05	2.56172e-05	FGF2/CAV1/PDGFC/FGFR1/PDE5A/ROR2/CD40/GSTP1/SFRP1/PDGFD/BMP4/PDGFRB/MEF2C/IL34/ROBO1/AJUBA/SPRY2/SPRY1/TGFB1/KIT/SFRP2/TLR4/EDN3/DKK1/PTPRC/THBS1/DUSP1/EDN1/CCL19	29
GO:0050819	negative regulation of coagulation	14/1151	54/18903	2.90347e-06	4.08614e-05	2.62504e-05	SERPING1/C1QTNF1/PRKG1/PDGFRA/ANXA2/CD34/PLAU/THBD/PROCR/CEACAM1/THBS1/SERPINF2/EDN1/SERPINE1	14
GO:1902895	positive regulation of miRNA transcription	13/1151	47/18903	2.97555e-06	4.17665e-05	2.68319e-05	FGF2/MYOCD/NGFR/TGFB1/GATA3/TEAD1/TGFB2/NR3C1/ETS1/KLF5/ATOH8/EGR1/FOS	13
GO:0043534	blood vessel endothelial cell migration	28/1151	177/18903	3.1247e-06	4.37458e-05	2.81035e-05	ATP2B4/FGF2/ANGPT1/FGFR1/CD40/RHOJ/SPRED1/MEF2C/ROBO1/ACVRL1/TGFB1/MMRN2/EPHA2/KDR/ID1/ETS1/ANXA1/PRKCA/GADD45A/CLEC14A/RGCC/JCAD/AMOT/THBS1/PTGS2/HSPB1/CYP1B1/EGR3	28
GO:0007431	salivary gland development	11/1151	34/18903	3.16981e-06	4.41474e-05	2.83614e-05	SNAI2/FGFR2/FGF7/PLXND1/TGFB1/NTN4/TGFB3/TGFB2/TFCP2L1/SEMA3C/TGM2	11
GO:0048333	mesodermal cell differentiation	11/1151	34/18903	3.16981e-06	4.41474e-05	2.83614e-05	GJA1/FOXF1/EYA1/BMP4/ITGB4/FGFR2/ITGA8/ITGA3/SFRP2/ITGA2/DKK1	11
GO:0090101	negative regulation of transmembrane receptor protein serine/threonine kinase signaling pathway	26/1151	158/18903	3.30802e-06	4.58426e-05	2.94505e-05	CAV2/CAV1/EMILIN1/TGFBR3/CHRDL1/TGFB1I1/SFRP1/FST/LTBP1/CHST11/SPRED1/FBN1/HTRA1/SPRY2/SPRY1/RBPMS2/SPART/TGFB3/CHRDL2/SFRP2/CRIM1/HTRA3/LRP1/DKK1/NBL1/DLX1	26
GO:0035904	aorta development	15/1151	62/18903	3.31711e-06	4.58426e-05	2.94505e-05	EDNRA/MYLK/EFEMP2/EYA1/PDE2A/PDGFRB/ROBO1/NGFR/ACVRL1/PLXND1/LOXL1/TGFB2/COL3A1/LRP1/EGR2	15
GO:0061614	miRNA transcription	15/1151	62/18903	3.31711e-06	4.58426e-05	2.94505e-05	FGF2/MYOCD/NFATC4/BMP4/NGFR/TGFB1/GATA3/TEAD1/TGFB2/NR3C1/ETS1/KLF5/ATOH8/EGR1/FOS	15
GO:0043523	regulation of neuron apoptotic process	32/1151	218/18903	3.34691e-06	4.61359e-05	2.96389e-05	AXL/PRNP/ANGPT1/ISL1/NES/GRIK5/ITGA1/CX3CL1/NFATC4/FAIM2/MEF2C/NDNF/PLXND1/UNC5B/GATA3/IL27RA/TGFB3/TGFB2/BCL2/KDR/NR3C1/IL6ST/CNTFR/CEBPB/CORO1A/FOXQ1/TYROBP/BTG2/CCL2/SOD2/VSTM2L/DLX1	32
GO:0045639	positive regulation of myeloid cell differentiation	20/1151	103/18903	3.38315e-06	4.65161e-05	2.98832e-05	FAXDC2/ROR2/CSF1/RAB7B/INPP5D/IL34/TGFB1/ZFP36L1/RUNX1/CD74/ETS1/PRKCA/HCLS1/EVI2B/CD4/HLA-DRB1/KLF10/TYROBP/ID2/FOS	20
GO:0019722	calcium-mediated signaling	31/1151	208/18903	3.43531e-06	4.71129e-05	3.02665e-05	ATP2B4/SLC8A1/PRNP/FHL2/RGN/PLN/RCAN2/ATP1A2/NFATC4/LMCD1/DMD/SELP/GSTM2/GBP1/KDR/EDNRB/CASQ2/ATP1B1/DMPK/VCAM1/CXCR4/CD3E/CAMKK2/CD4/ACKR3/DEFB1/PTPRC/EDN1/CASQ1/ITPR1/SELE	31
GO:0002819	regulation of adaptive immune response	30/1151	198/18903	3.49384e-06	4.77936e-05	3.07039e-05	IL33/CD40/MR1/MEF2C/TGFB1/GATA3/TNFRSF1B/IL27RA/HLA-E/C3/PLA2G4A/IL6ST/AHR/ANXA1/ARID5A/HLA-DRA/TNFAIP3/IL7R/CD48/CD4/HLA-DRB1/PYCARD/PTPRC/CEACAM1/HLA-F/CCL19/HLA-A/IL6/JUNB/AZGP1	30
GO:0030193	regulation of blood coagulation	16/1151	70/18903	3.51449e-06	4.79541e-05	3.0807e-05	CAV1/EMILIN1/SERPING1/C1QTNF1/PRKG1/ANO6/PDGFRA/ANXA2/CD34/PLAU/THBD/CEACAM1/THBS1/SERPINF2/EDN1/SERPINE1	16
GO:0003179	heart valve morphogenesis	14/1151	55/18903	3.67832e-06	4.98101e-05	3.19994e-05	EMILIN1/TGFBR2/SNAI2/BMP4/DCHS1/MEF2C/ROBO1/TGFB1/GATA3/ELN/TGFB2/HEYL/CCN1/FGFRL1	14
GO:0010761	fibroblast migration	14/1151	55/18903	3.67832e-06	4.98101e-05	3.19994e-05	TNS1/FGF2/SLC8A1/ACTA2/DDR2/CORO1C/CD248/CYGB/PDLIM1/AQP1/ILK/TGFB1/AKAP12/THBS1	14
GO:0072132	mesenchyme morphogenesis	14/1151	55/18903	3.67832e-06	4.98101e-05	3.19994e-05	ACTA2/FOXF1/ISL1/FOXC1/ACTG2/TGFBR2/SNAI2/DCHS1/ROBO1/ACVRL1/ACTC1/TGFB2/HEYL/ACTA1	14
GO:0035051	cardiocyte differentiation	26/1151	159/18903	3.72965e-06	5.03783e-05	3.23644e-05	EDNRA/FZD7/TGFBR3/SLC8A1/ASB2/MYH11/MYOCD/FHL2/ISL1/RARB/SGCB/FHOD3/BMP4/PDGFRB/MEF2C/PDGFRA/SPRY1/TGFB1/ACTC1/TGFB2/VCAM1/DLL1/DKK1/PI16/EDN1/SEMA3C	26
GO:0002698	negative regulation of immune effector process	22/1151	122/18903	4.02452e-06	5.41929e-05	3.48149e-05	AXL/FOXF1/ANGPT1/SERPING1/IL33/SERPINB9/FGL2/TGFB1/A2M/LGALS3/HLA-E/TGFB3/TGFB2/AHR/ANXA1/IL7R/BST2/PTPRC/CEACAM1/HLA-F/HLA-A/ACP5	22
GO:0010232	vascular transport	18/1151	87/18903	4.04229e-06	5.41929e-05	3.48149e-05	ATP2B4/SLC24A3/KCNJ8/SLC16A2/ABCC9/LEPR/ATP1A2/ATP1B2/SLC2A4/ABCB1/ABCG2/SLC29A1/ABCC3/LRP1/SLC7A3/SLC2A3/SLC15A2/SLC22A3	18
GO:0150104	transport across blood-brain barrier	18/1151	87/18903	4.04229e-06	5.41929e-05	3.48149e-05	ATP2B4/SLC24A3/KCNJ8/SLC16A2/ABCC9/LEPR/ATP1A2/ATP1B2/SLC2A4/ABCB1/ABCG2/SLC29A1/ABCC3/LRP1/SLC7A3/SLC2A3/SLC15A2/SLC22A3	18
GO:0070555	response to interleukin-1	24/1151	141/18903	4.27266e-06	5.69939e-05	3.66144e-05	PTGIS/CD40/MMP2/CX3CL1/GBP2/SFRP1/SIRPA/GBP1/CYBA/ANXA1/PRKCA/CCL21/AKAP12/CEBPB/KLF2/CCL5/PYCARD/CCL2/EDN1/CCL19/SELE/EGR1/IL6/CD38	24
GO:0002548	monocyte chemotaxis	16/1151	71/18903	4.28303e-06	5.69939e-05	3.66144e-05	CX3CL1/ANO6/LGALS3/S100A14/ANXA1/CXCL12/CCL21/AIF1/CCL5/CXCL17/CCL2/NBL1/DUSP1/CCL19/IL6/SERPINE1	16
GO:0070527	platelet aggregation	16/1151	71/18903	4.28303e-06	5.69939e-05	3.66144e-05	FLNA/PDPN/VCL/C1QTNF1/PRKG1/CSRP1/MYL9/TLN1/PDGFRA/ILK/IL6ST/PRKCA/FN1/CEACAM1/HSPB1/IL6	16
GO:0043010	camera-type eye development	43/1151	340/18903	4.39205e-06	5.83004e-05	3.74537e-05	MEIS1/ATP2B4/FGF2/SERPINF1/VSTM4/MITF/NES/EFEMP1/FOXC1/ZEB1/TGFBR2/ALDH1A2/RHOJ/CRYAB/RARG/SMARCD3/CLIC4/COL8A2/GLI3/VIM/SPRED1/BMP4/PDGFRB/FBN1/AQP1/PDGFRA/SPRY2/SPRY1/TMOD1/ACVRL1/NDP/GATA3/COL4A1/EPHA2/TGFB2/KDR/SLITRK6/DLL1/FOXF2/LAMB2/COL8A1/DLX1/CYP1B1	43
GO:0046718	viral entry into host cell	25/1151	151/18903	4.53905e-06	6.01033e-05	3.86119e-05	CAV2/CAV1/AXL/GSN/GAS6/ITGA5/CTSB/LGALS1/NCAM1/TRIM22/EPHA2/ITGB6/CD74/CH25H/IFITM3/IFITM2/ITGA2/CXCR4/SELPLG/CD4/HLA-DRB1/PLSCR1/IFITM1/CLDN1/ANPEP	25
GO:0003094	glomerular filtration	10/1151	29/18903	4.647e-06	6.12244e-05	3.93322e-05	EDNRA/KIRREL1/MCAM/GAS6/SULF2/AQP1/CD34/SULF1/CYBA/JCHAIN	10
GO:0010575	positive regulation of vascular endothelial growth factor production	10/1151	29/18903	4.647e-06	6.12244e-05	3.93322e-05	ISL1/SULF2/TGFB1/SULF1/C3/IL6ST/CXCL17/PTGS2/IL6/CYP1B1	10
GO:0010755	regulation of plasminogen activation	8/1151	18/18903	4.65789e-06	6.12244e-05	3.93322e-05	ANXA2/RUNX1/PLAU/HPN/CLEC3B/THBS1/SERPINF2/SERPINE1	8
GO:0033628	regulation of cell adhesion mediated by integrin	13/1151	49/18903	4.95628e-06	6.49877e-05	4.17498e-05	SNAI2/JAM3/EPHA2/TGFB2/SFRP2/PLAU/CCL21/CD3E/CCL5/FERMT1/RAC3/SERPINE1/CYP1B1	13
GO:0051893	regulation of focal adhesion assembly	15/1151	64/18903	5.06974e-06	6.61528e-05	4.24983e-05	FERMT2/MMP14/VCL/CORO1C/EPHA3/SFRP1/GPM6B/COL16A1/EFNA5/FAM107A/TLN1/ACVRL1/KDR/THBS1/MYOC	15
GO:0090109	regulation of cell-substrate junction assembly	15/1151	64/18903	5.06974e-06	6.61528e-05	4.24983e-05	FERMT2/MMP14/VCL/CORO1C/EPHA3/SFRP1/GPM6B/COL16A1/EFNA5/FAM107A/TLN1/ACVRL1/KDR/THBS1/MYOC	15
GO:1900046	regulation of hemostasis	16/1151	72/18903	5.19869e-06	6.76711e-05	4.34737e-05	CAV1/EMILIN1/SERPING1/C1QTNF1/PRKG1/ANO6/PDGFRA/ANXA2/CD34/PLAU/THBD/CEACAM1/THBS1/SERPINF2/EDN1/SERPINE1	16
GO:0030593	neutrophil chemotaxis	20/1151	106/18903	5.35732e-06	6.93999e-05	4.45843e-05	ITGA9/ITGA1/CX3CL1/JAM3/LGALS3/TGFB2/CD74/EDN3/CCL21/CCL5/ITGB2/RAC2/CXCL6/CCL2/EDN1/CXCL1/S100A9/CCL19/CXCL2/SAA1	20
GO:0042102	positive regulation of T cell proliferation	20/1151	106/18903	5.35732e-06	6.93999e-05	4.45843e-05	EFNB1/TGFBR2/IL27RA/HLA-E/HLA-DPB1/HLA-DPA1/IL6ST/ANXA1/VCAM1/VTCN1/AIF1/CD3E/CCL5/IGF2/PYCARD/PTPRC/CORO1A/CCL19/HLA-A/IL6	20
GO:0048017	inositol lipid-mediated signaling	28/1151	182/18903	5.42672e-06	7.01299e-05	4.50533e-05	FGF2/PDGFC/ANGPT1/FGFR1/ROR2/PLCD3/PDGFD/TNFAIP8L3/DCN/PDGFRB/PDGFRA/CSF1R/SELP/UNC5B/ZFP36L1/GATA3/KIT/TGFB2/PLCL1/KDR/HCLS1/PIK3R1/FN1/CCL5/IRS1/CEACAM1/MYOC/EDN1	28
GO:0051402	neuron apoptotic process	35/1151	255/18903	5.57883e-06	7.19228e-05	4.62051e-05	AXL/PRNP/ANGPT1/ISL1/NES/GRIK5/ITGA1/CX3CL1/NFATC4/FAIM2/NLRP1/MEF2C/NGFR/TP63/NDNF/PLXND1/UNC5B/GATA3/IL27RA/TGFB3/TGFB2/BCL2/KDR/NR3C1/IL6ST/CNTFR/CEBPB/CORO1A/FOXQ1/TYROBP/BTG2/CCL2/SOD2/VSTM2L/DLX1	35
GO:0048864	stem cell development	18/1151	89/18903	5.67394e-06	7.27997e-05	4.67685e-05	EDNRA/FGF2/ANXA6/ISL1/FOXC1/EFNB1/CORO1C/ALDH1A2/NRP2/SNAI2/BMP4/BCL2/EDNRB/EDN3/FN1/PTPRC/EDN1/SEMA3C	18
GO:0050829	defense response to Gram-negative bacterium	18/1151	89/18903	5.67394e-06	7.27997e-05	4.67685e-05	MR1/RARRES2/AQP1/SSC5D/SELP/OPTN/RNASE6/TLR4/MPEG1/CD4/CXCL6/PYCARD/DEFB1/LTF/LYZ/IL6/SERPINE1/CHGA	18
GO:0006022	aminoglycan metabolic process	23/1151	134/18903	5.82163e-06	7.45169e-05	4.78716e-05	EDNRA/CHST3/FGF2/ITIH5/ANGPT1/EGFLAM/FOXC1/SPOCK3/CHST11/DCN/PDGFRB/CHST15/B3GNT8/B3GNT9/NDNF/CHST2/TGFB1/UST/EDNRB/B3GNT3/BGN/CHI3L2/HPSE2	23
GO:0097191	extrinsic apoptotic signaling pathway	32/1151	224/18903	5.9965e-06	7.65729e-05	4.91924e-05	CAV1/IL33/FGFR1/CX3CL1/GSTP1/SFRP1/FAIM2/EYA1/ARHGEF2/SNAI2/BMP4/SRPX/TIMP3/TLR3/UNC5B/TGFB1/TNFRSF1B/LGALS3/ITM2C/TGFB2/BCL2/SFRP2/MAL/G0S2/PIK3R1/TNFAIP3/PYCARD/PTPRC/THBS1/TNFRSF12A/SERPINE1/ATF3	32
GO:0001936	regulation of endothelial cell proliferation	28/1151	183/18903	6.04193e-06	7.69701e-05	4.94476e-05	CAV2/FGF2/CAV1/FGFR1/ALDH1A2/NRP2/BMP4/MEF2C/ECM1/NGFR/ACVRL1/FGF7/MMRN2/SULF1/CYBA/SPARC/KDR/PRKCA/CXCL12/ATOH8/PROK1/RGCC/JCAD/IGF2/THBS1/CCL2/ANG/EGR3	28
GO:1904375	regulation of protein localization to cell periphery	22/1151	125/18903	6.07089e-06	7.7e-05	4.94668e-05	ATP2B4/CLIP3/SORBS1/PRNP/MMP14/EPHA3/EPB41L2/RAB38/STAC/MRAP2/TGFB1/TAMALIN/GBP1/LGALS3/EPHA2/ITGA3/STAC2/PIK3R1/PID1/LRP1/RAMP3/MISP	22
GO:0007422	peripheral nervous system development	17/1151	81/18903	6.07292e-06	7.7e-05	4.94668e-05	PMP22/ISL1/NFASC/CNTNAP1/ITGB4/HOXD10/ILK/RUNX1/GSTM3/EDNRB/HOXD9/LAMB2/MYOC/CLDN1/EGR2/NEFH/EGR3	17
GO:0007272	ensheathment of neurons	24/1151	144/18903	6.22208e-06	7.83507e-05	5.03346e-05	TSPAN2/PMP22/LPAR1/JAM2/CLDN11/CNTN1/CLU/MARVELD1/NFASC/RARG/CNTNAP1/ITGB4/JAM3/ID4/ILK/TNFRSF1B/MAL/MPZ/CXCR4/CLDN5/PTN/CST7/MYOC/EGR2	24
GO:0008366	axon ensheathment	24/1151	144/18903	6.22208e-06	7.83507e-05	5.03346e-05	TSPAN2/PMP22/LPAR1/JAM2/CLDN11/CNTN1/CLU/MARVELD1/NFASC/RARG/CNTNAP1/ITGB4/JAM3/ID4/ILK/TNFRSF1B/MAL/MPZ/CXCR4/CLDN5/PTN/CST7/MYOC/EGR2	24
GO:0080164	regulation of nitric oxide metabolic process	15/1151	65/18903	6.22317e-06	7.83507e-05	5.03346e-05	ATP2B4/CAV1/PTGIS/RGN/CLU/SIRPA/CD34/TLR4/AIF1/KLF2/SOD2/EDN1/PTGS2/ACP5/NPY	15
GO:0150076	neuroinflammatory response	16/1151	73/18903	6.2856e-06	7.89519e-05	5.07208e-05	SYT11/IL33/CX3CL1/CLU/CD200/TLR3/TNFRSF1B/AIF1/C1QA/LRP1/ITGB2/CST7/PTPRC/TYROBP/PTGS2/IL6	16
GO:0030195	negative regulation of blood coagulation	13/1151	50/18903	6.327e-06	7.92866e-05	5.09358e-05	SERPING1/C1QTNF1/PRKG1/PDGFRA/ANXA2/CD34/PLAU/THBD/CEACAM1/THBS1/SERPINF2/EDN1/SERPINE1	13
GO:0000302	response to reactive oxygen species	30/1151	204/18903	6.4603e-06	8.07688e-05	5.1888e-05	AXL/SLC8A1/DDR2/TPM1/MMP2/GSTP1/MET/PDGFD/CRYAB/FBLN5/PDGFRB/SIRPA/AQP1/PDGFRA/BCL2/RHOB/ANXA1/TNFAIP3/KLF2/CAMKK2/COL1A1/SOD2/EDN1/SDC1/SOD3/IL6/SCGB1A1/FOS/NR4A3/CYP1B1	30
GO:0043524	negative regulation of neuron apoptotic process	25/1151	154/18903	6.50419e-06	8.11288e-05	5.21193e-05	AXL/ANGPT1/ISL1/NES/CX3CL1/NFATC4/FAIM2/MEF2C/NDNF/PLXND1/UNC5B/IL27RA/TGFB3/BCL2/KDR/IL6ST/CNTFR/CEBPB/CORO1A/FOXQ1/BTG2/CCL2/SOD2/VSTM2L/DLX1	25
GO:0070293	renal absorption	10/1151	30/18903	6.59124e-06	8.20243e-05	5.26946e-05	EDNRA/KIRREL1/GSN/GAS6/AQP1/EDNRB/EDN1/AQP3/SGK1/SLC15A2	10
GO:0044089	positive regulation of cellular component biogenesis	56/1151	498/18903	6.78046e-06	8.41842e-05	5.40822e-05	CAV1/FERMT2/LMOD1/DPYSL3/EMILIN1/SYNPO2/LPAR1/KIRREL1/SYNPO/CDC42EP3/TPM1/MSN/CX3CL1/CLU/NLGN3/SFRP1/COL16A1/MET/PHLDB1/EFNA5/KCTD17/LDB2/FCHSD2/MAP1B/SNX7/CDC42EP4/AJUBA/TGFB1/KIT/LGALS3/FLRT3/CCN2/EPHA2/TGFB3/TLR4/KDR/SLITRK6/ID1/PRKCA/HOPX/PIK3R1/CCL21/CLDN5/RGCC/RAC2/PYCARD/FERMT1/AMIGO2/MYOC/CLDN1/SERPINF2/SDC1/CCL19/THBS2/CDC42EP5/CHGA	56
GO:0014065	phosphatidylinositol 3-kinase signaling	24/1151	145/18903	7.03307e-06	8.67958e-05	5.57599e-05	FGF2/PDGFC/ANGPT1/FGFR1/ROR2/PDGFD/DCN/PDGFRB/PDGFRA/SELP/UNC5B/ZFP36L1/GATA3/KIT/TGFB2/KDR/HCLS1/PIK3R1/FN1/CCL5/IRS1/CEACAM1/MYOC/EDN1	24
GO:0071214	cellular response to abiotic stimulus	42/1151	335/18903	7.03924e-06	8.67958e-05	5.57599e-05	FGF2/MYLK/IL33/CD40/MMP2/IFI16/ATP1A2/SFRP1/CCND2/NFATC4/MAP3K20/SLC2A4/CRYAB/ARHGEF2/CNN2/SNAI2/PDE2A/MFAP4/EFHD1/AKR1B1/AQP1/CASP1/TLR3/ZFP36L1/GATA3/TIMP1/ITGB6/CYBA/RHOB/SFRP2/TLR4/SCNN1A/TRPV4/GADD45A/PIK3R1/ITGA2/PYCARD/COL1A1/PTGS2/EGR1/SCNN1G/MME	42
GO:0104004	cellular response to environmental stimulus	42/1151	335/18903	7.03924e-06	8.67958e-05	5.57599e-05	FGF2/MYLK/IL33/CD40/MMP2/IFI16/ATP1A2/SFRP1/CCND2/NFATC4/MAP3K20/SLC2A4/CRYAB/ARHGEF2/CNN2/SNAI2/PDE2A/MFAP4/EFHD1/AKR1B1/AQP1/CASP1/TLR3/ZFP36L1/GATA3/TIMP1/ITGB6/CYBA/RHOB/SFRP2/TLR4/SCNN1A/TRPV4/GADD45A/PIK3R1/ITGA2/PYCARD/COL1A1/PTGS2/EGR1/SCNN1G/MME	42
GO:0043406	positive regulation of MAP kinase activity	21/1151	117/18903	7.14524e-06	8.79012e-05	5.64701e-05	FGF2/PDGFC/FGFR1/PDE5A/ROR2/CD40/PDGFD/PDGFRB/MEF2C/IL34/ROBO1/AJUBA/TGFB1/KIT/TLR4/EDN3/DKK1/PTPRC/THBS1/EDN1/CCL19	21
GO:0060350	endochondral bone morphogenesis	14/1151	58/18903	7.21896e-06	8.86053e-05	5.69224e-05	ANXA6/MMP14/FOXC1/RARB/TGFBR2/RARG/BMP4/MEF2C/COL27A1/TMEM119/TRPV4/COL3A1/COL1A1/ALPL	14
GO:0051495	positive regulation of cytoskeleton organization	29/1151	195/18903	7.33527e-06	8.98278e-05	5.77078e-05	FERMT2/LMOD1/SYNPO2/LPAR1/KIRREL1/NES/SYNPO/GSN/CDC42EP3/TPM1/CFL2/CX3CL1/SFRP1/MET/FCHSD2/MAP1B/CDC42EP4/CCN2/TGFB3/TRPV4/ID1/HCLS1/CCL21/RGCC/PYCARD/MYOC/SERPINF2/EDN1/CDC42EP5	29
GO:0010812	negative regulation of cell-substrate adhesion	15/1151	66/18903	7.60457e-06	9.28406e-05	5.96432e-05	FZD7/MMP14/FBLN1/CX3CL1/CORO1C/EFNA5/FAM107A/ACVRL1/GBP1/KANK1/PIK3R1/THBS1/MYOC/COL1A1/SERPINE1	15
GO:0010759	positive regulation of macrophage chemotaxis	8/1151	19/18903	7.61583e-06	9.28406e-05	5.96432e-05	CSF1/RARRES2/IL34/CSF1R/TRPV4/CCL5/THBS1/CXCL17	8
GO:0042742	defense response to bacterium	46/1151	382/18903	7.71636e-06	9.38533e-05	6.02938e-05	EMILIN1/SYT11/GBP2/MR1/NLRP1/RARRES2/AQP1/SSC5D/SELP/TLR3/OPTN/MMRN2/IL27RA/WFDC2/EPHA2/HLA-E/STAB1/CYBA/RNASE6/TLR4/RNASE1/S100A14/MPEG1/IL7R/CEBPB/CD4/CXCL6/PYCARD/DEFB1/GBP4/LTF/JCHAIN/S100A9/COCH/HLA-A/LCN2/ANG/LYZ/IL6/SERPINE1/ACP5/IGLL5/PI3/SPON2/CHGA/PGC	46
GO:0030225	macrophage differentiation	13/1151	51/18903	8.02172e-06	9.71278e-05	6.23975e-05	TSPAN2/ROR2/CSF1/BMP4/IL34/CSF1R/TGFB1/PRKCA/HCLS1/CD4/C1QC/HLA-DRB1/ID2	13
GO:1900047	negative regulation of hemostasis	13/1151	51/18903	8.02172e-06	9.71278e-05	6.23975e-05	SERPING1/C1QTNF1/PRKG1/PDGFRA/ANXA2/CD34/PLAU/THBD/CEACAM1/THBS1/SERPINF2/EDN1/SERPINE1	13
GO:0071346	cellular response to interferon-gamma	21/1151	118/18903	8.20099e-06	9.90753e-05	6.36486e-05	GSN/CX3CL1/GBP2/RAB7B/VIM/SIRPA/ZYX/CASP1/CDC42EP4/TLR3/GBP1/TLR4/HLA-DPA1/CCL21/AIF1/CCL5/GBP4/CLDN1/CCL2/EDN1/CCL19	21
GO:0051250	negative regulation of lymphocyte activation	26/1151	166/18903	8.35589e-06	0.000100503	6.45655e-05	AXL/PRNP/PDE5A/VSIR/SFRP1/GLI3/INPP5D/BMP4/FGL2/RASSF5/LGALS3/RUNX1/CD74/ANXA1/VTCN1/TNFAIP3/LRRC32/CEBPB/LAPTM5/HLA-DRB1/CEACAM1/TYROBP/HLA-F/GPNMB/ID2/SCGB1A1	26
GO:0032635	interleukin-6 production	27/1151	176/18903	8.37521e-06	0.000100503	6.45655e-05	ISL1/SYT11/IL33/CX3CL1/GAS6/AFAP1L2/RAB7B/ARHGEF2/INPP5D/SIRPA/CD200/TLR3/IL27RA/CYBA/TLR4/CD74/TRPV4/ARID5A/AIF1/TNFAIP3/CEBPB/KLF2/PYCARD/TYROBP/IL6/SPON2/ORM1	27
GO:0032675	regulation of interleukin-6 production	27/1151	176/18903	8.37521e-06	0.000100503	6.45655e-05	ISL1/SYT11/IL33/CX3CL1/GAS6/AFAP1L2/RAB7B/ARHGEF2/INPP5D/SIRPA/CD200/TLR3/IL27RA/CYBA/TLR4/CD74/TRPV4/ARID5A/AIF1/TNFAIP3/CEBPB/KLF2/PYCARD/TYROBP/IL6/SPON2/ORM1	27
GO:0045657	positive regulation of monocyte differentiation	6/1151	10/18903	8.5442e-06	0.000102302	6.57215e-05	CSF1/IL34/ZFP36L1/CD74/CD4/HLA-DRB1	6
GO:0060828	regulation of canonical Wnt signaling pathway	35/1151	260/18903	8.61304e-06	0.000102897	6.61038e-05	RBMS3/FGF2/CAV1/FZD7/ADGRA2/DKK3/ISL1/DACT3/DAAM2/GPRC5B/IGFBP4/DACT1/SFRP1/MCC/WWTR1/RSPO3/GLI3/SNAI2/FOXO1/FGFR2/SOX7/ILK/TGFB1/KANK1/SFRP2/LGR6/IGFBP6/PLEKHA4/CDH3/GPC3/FRZB/DKK1/FERMT1/COL1A1/EGR1	35
GO:0098742	cell-cell adhesion via plasma-membrane adhesion molecules	37/1151	282/18903	8.72741e-06	0.000104032	6.68331e-05	NEXN/PALLD/PCDH7/SPARCL1/CLDN11/PCDH18/CX3CL1/PCDH10/ITGA5/TGFBR2/EFNA5/DCHS1/MYADM/ROBO1/AJUBA/SELP/FLRT3/CDH11/TGFB2/MPZL2/PECAM1/FXYD5/CDH3/MPZ/VCAM1/CLDN5/ITGB2/CEACAM1/DSC3/AMIGO2/FGFRL1/CLDN1/PTPRT/SELE/CLDN7/CD177/VSTM2L	37
GO:0001933	negative regulation of protein phosphorylation	42/1151	338/18903	8.7895e-06	0.000104541	6.71596e-05	CAV1/EMILIN1/SLC8A1/PRNP/MYOCD/ANGPT1/KIRREL1/RGN/FBLN1/CORO1C/GSTP1/PLPP3/SFRP1/WWTR1/SPRED1/BMP4/SIRPA/MYADM/DMD/SPRY2/SPRY1/TGFB1/PKIG/MVP/SFRP2/GADD45A/HEG1/PID1/TNFAIP3/LRP1/SOCS3/DKK1/IGFBP3/PYCARD/DUSP6/PTPRC/CEACAM1/DUSP1/PTPRT/HSPB1/DDIT4/GADD45B	42
GO:0035296	regulation of tube diameter	24/1151	147/18903	8.9498e-06	0.000105978	6.80832e-05	EDNRA/CAV1/KCNMB1/SLC8A1/ACTA2/VSTM4/FOXC1/KCNMA1/ITGA1/MMP2/PRKG1/ATP1A2/P2RX1/ADRA1D/EDNRB/EDN3/KLF2/SERPINF2/ADRA2C/SOD2/EDN1/SOD3/PTGS2/CD38	24
GO:0097746	blood vessel diameter maintenance	24/1151	147/18903	8.9498e-06	0.000105978	6.80832e-05	EDNRA/CAV1/KCNMB1/SLC8A1/ACTA2/VSTM4/FOXC1/KCNMA1/ITGA1/MMP2/PRKG1/ATP1A2/P2RX1/ADRA1D/EDNRB/EDN3/KLF2/SERPINF2/ADRA2C/SOD2/EDN1/SOD3/PTGS2/CD38	24
GO:0002700	regulation of production of molecular mediator of immune response	28/1151	187/18903	9.19478e-06	0.000108473	6.96858e-05	AXL/ANGPT1/IL33/GPRC5B/CD40/TLR3/TGFB1/GATA3/TNFRSF1B/KIT/IL27RA/HLA-E/TGFB3/TGFB2/TLR4/CD74/ARID5A/LAPTM5/PYCARD/BST2/PTPRC/HLA-F/HLA-A/IL6/NR4A3/ACP5/SPON2/PGC	28
GO:0031069	hair follicle morphogenesis	10/1151	31/18903	9.20082e-06	0.000108473	6.96858e-05	FST/FGFR2/NGFR/TP63/FGF7/TGFB2/BCL2/IGFBP5/FOXQ1/KRT17	10
GO:0072091	regulation of stem cell proliferation	18/1151	92/18903	9.24104e-06	0.000108602	6.97686e-05	FGF2/GJA1/FERMT2/PRRX1/FBLN1/RARB/TGFBR2/RARG/GLI3/SNAI2/ID4/TP63/PBX1/ZFP36L1/LTBP3/KDR/PTPRC/FERMT1	18
GO:1904377	positive regulation of protein localization to cell periphery	15/1151	67/18903	9.25215e-06	0.000108602	6.97686e-05	ATP2B4/CLIP3/SORBS1/PRNP/EPHA3/EPB41L2/RAB38/STAC/LGALS3/EPHA2/ITGA3/STAC2/PIK3R1/LRP1/RAMP3	15
GO:0031579	membrane raft organization	9/1151	25/18903	9.36222e-06	0.000109654	7.04448e-05	CAV2/CAV1/GSN/MYADM/RFTN1/ANXA2/MAL/PTPRC/CD2	9
GO:0048562	embryonic organ morphogenesis	38/1151	294/18903	9.41955e-06	0.00010996	7.0641e-05	EDNRA/ASB2/PRRX1/FOXF1/EFEMP1/MMP14/ZEB1/TCF21/RARB/TGFBR2/RARG/EYA1/NTN1/GLI3/CHST11/BMP4/FBN1/HOXD10/MEF2C/PDGFRA/FGFR2/SPRY2/ITGA8/MFAP2/GATA3/EPHA2/RBPMS2/TGFB3/HOXB2/SLITRK6/HPN/DLL1/FRZB/HOXD9/FOXF2/VANGL2/EDN1/ID2	38
GO:0045860	positive regulation of protein kinase activity	49/1151	420/18903	9.4292e-06	0.00010996	7.0641e-05	ATP2B4/FGF2/FERMT2/PRNP/DDR2/PDGFC/ANGPT1/FGFR1/PDE5A/GPRC5B/ROR2/CD40/CLU/CSF1/GAS6/AFAP1L2/TGFBR2/CCND2/PDGFD/EFNA5/PDGFRB/MEF2C/IL34/ROBO1/CSF1R/AJUBA/SPRY2/TLR3/TGFB1/KIT/TGFB2/TLR4/EDN3/CCL21/RGCC/CCL5/CAMKK2/CD4/IGF2/DKK1/PTPRC/THBS1/CCN1/LTF/ADRA2C/EDN1/CCL19/ANG/EGR1	49
GO:0045216	cell-cell junction organization	30/1151	208/18903	9.56988e-06	0.000111359	7.15397e-05	GJA1/CAV1/FLNA/FERMT2/KIRREL1/VCL/CLDN11/LIMS2/GJC1/KIFC3/CNTNAP1/SNAI2/TLN1/DCHS1/JAM3/CSF1R/TGFB1/EPHA2/CDH11/TGFB3/TGFB2/PECAM1/TRPV4/PRKCA/HEG1/HOPX/CLDN5/CLDN1/CLDN7/CD177	30
GO:0030879	mammary gland development	23/1151	138/18903	9.64427e-06	0.000111982	7.19401e-05	FGF2/CAV1/FOXF1/CSF1/TGFBR2/NTN1/GLI3/BMP4/ROBO1/FGFR2/CSF1R/PAM/GATA3/EPHA2/TGFB3/NR3C1/SLC29A1/IGFBP5/ITGA2/CEBPB/HOXD9/ID2/FASN	23
GO:0035150	regulation of tube size	24/1151	148/18903	1.0076e-05	0.000116743	7.49989e-05	EDNRA/CAV1/KCNMB1/SLC8A1/ACTA2/VSTM4/FOXC1/KCNMA1/ITGA1/MMP2/PRKG1/ATP1A2/P2RX1/ADRA1D/EDNRB/EDN3/KLF2/SERPINF2/ADRA2C/SOD2/EDN1/SOD3/PTGS2/CD38	24
GO:0010543	regulation of platelet activation	13/1151	52/18903	1.01041e-05	0.000116816	7.5046e-05	FLNA/PDPN/C1QTNF1/PRKG1/PDGFRA/SELP/PLA2G4A/TLR4/IL6ST/PRKCA/THBD/CEACAM1/IL6	13
GO:0044409	entry into host	25/1151	158/18903	1.03271e-05	0.000119138	7.65374e-05	CAV2/CAV1/AXL/GSN/GAS6/ITGA5/CTSB/LGALS1/NCAM1/TRIM22/EPHA2/ITGB6/CD74/CH25H/IFITM3/IFITM2/ITGA2/CXCR4/SELPLG/CD4/HLA-DRB1/PLSCR1/IFITM1/CLDN1/ANPEP	25
GO:0048015	phosphatidylinositol-mediated signaling	27/1151	178/18903	1.03616e-05	0.000119281	7.66291e-05	FGF2/PDGFC/ANGPT1/FGFR1/ROR2/PLCD3/PDGFD/DCN/PDGFRB/PDGFRA/CSF1R/SELP/UNC5B/ZFP36L1/GATA3/KIT/TGFB2/PLCL1/KDR/HCLS1/PIK3R1/FN1/CCL5/IRS1/CEACAM1/MYOC/EDN1	27
GO:1904705	regulation of vascular associated smooth muscle cell proliferation	18/1151	93/18903	1.08153e-05	0.000124237	7.9813e-05	FGF2/GJA1/EFEMP2/DDR2/MYOCD/TPM1/MMP2/PRKG1/CNN1/MEF2C/NDRG2/TGFB3/IGFBP5/CALCRL/ADAMTS1/SOD2/EDN1/NR4A3	18
GO:0018958	phenol-containing compound metabolic process	20/1151	111/18903	1.10443e-05	0.000126059	8.09838e-05	EDNRA/SLC16A2/CTSB/RAB38/CTSK/EPAS1/MOXD1/GATA3/TGFB2/BCL2/DUOX1/DUOXA1/DIO2/CPQ/CDH3/MAOB/HPN/ITGB2/ALDH2/NPY	20
GO:0032611	interleukin-1 beta production	20/1151	111/18903	1.10443e-05	0.000126059	8.09838e-05	ISL1/CX3CL1/IFI16/GSTP1/SERPINB1/NLRP1/SIRPA/CASP1/S1PR3/TLR4/TNFAIP3/PYCARD/TYROBP/CCL19/HSPB1/EGR1/IL6/ACP5/ORM2/ORM1	20
GO:0032651	regulation of interleukin-1 beta production	20/1151	111/18903	1.10443e-05	0.000126059	8.09838e-05	ISL1/CX3CL1/IFI16/GSTP1/SERPINB1/NLRP1/SIRPA/CASP1/S1PR3/TLR4/TNFAIP3/PYCARD/TYROBP/CCL19/HSPB1/EGR1/IL6/ACP5/ORM2/ORM1	20
GO:0051896	regulation of protein kinase B signaling	28/1151	189/18903	1.12793e-05	0.000128469	8.25318e-05	FGF2/AXL/FERMT2/ANGPT1/FGFR1/CX3CL1/C1QTNF1/GAS6/MET/TNFAIP8L3/F10/SPRY2/RASD2/TGFB1/GATA3/EPHA2/CAVIN3/IGFBP5/HCLS1/RRAS/CCL21/PHLDA3/IGF2/RAMP3/THBS1/RCN3/MYOC/CCL19	28
GO:0042542	response to hydrogen peroxide	22/1151	130/18903	1.16505e-05	0.000132137	8.48886e-05	AXL/SLC8A1/DDR2/MMP2/MET/PDGFD/CRYAB/PDGFRB/SIRPA/AQP1/BCL2/RHOB/ANXA1/TNFAIP3/KLF2/COL1A1/SOD2/EDN1/SDC1/IL6/NR4A3/CYP1B1	22
GO:1990266	neutrophil migration	22/1151	130/18903	1.16505e-05	0.000132137	8.48886e-05	ITGA9/ITGA1/CX3CL1/JAM3/LGALS3/TGFB2/PECAM1/CD74/EDN3/CCL21/CCL5/ITGB2/RAC2/CXCL6/CCL2/EDN1/CXCL1/S100A9/CCL19/CXCL2/CD177/SAA1	22
GO:0034103	regulation of tissue remodeling	17/1151	85/18903	1.19881e-05	0.00013568	8.71641e-05	DDR2/LEPR/SFRP1/INPP5D/CSF1R/TGFB1/S1PR1/LTBP3/RUNX1/TMEM119/PDK4/PRKCA/TNFAIP3/CEACAM1/GPNMB/IL6/CD38	17
GO:0007389	pattern specification process	53/1151	472/18903	1.23911e-05	0.000139947	8.99054e-05	MEIS1/FGF2/MEIS2/CHRDL1/ASB2/FOXF1/ISL1/FOXC1/EFNB1/DAAM2/ZEB1/HOXD13/GPR161/SFRP1/TGFBR2/ALDH1A2/RARG/SMARCD3/EYA1/FST/GLI3/NRP2/BMP4/ETS2/HHIP/HOXD10/HOXD11/DCHS1/MEF2C/ROBO1/FGFR2/SPRY1/ACVRL1/TP63/PBX1/SFRP2/HOXB2/C3/GPC3/DLL1/HEYL/C1QA/HOXD9/DKK1/VANGL2/BTG2/NBL1/EDN1/SEMA3C/SP8/EGR2/BHLHE40/DLX1	53
GO:0048146	positive regulation of fibroblast proliferation	13/1151	53/18903	1.26478e-05	0.000142195	9.135e-05	DDR2/PDGFC/CD248/GAS6/PDGFD/S100A6/PDGFRB/AQP1/PDGFRA/NGFR/CD74/FN1/FOSL2	13
GO:0007435	salivary gland morphogenesis	10/1151	32/18903	1.26556e-05	0.000142195	9.135e-05	SNAI2/FGFR2/FGF7/PLXND1/TGFB1/NTN4/TGFB3/TGFB2/SEMA3C/TGM2	10
GO:0002468	dendritic cell antigen processing and presentation	7/1151	15/18903	1.2717e-05	0.000142195	9.135e-05	FGL2/CD74/CCL21/HLA-DRA/HLA-DRB1/THBS1/CCL19	7
GO:0001890	placenta development	24/1151	150/18903	1.27225e-05	0.000142195	9.135e-05	ETNK2/PLCD3/SOX15/CTSB/RSPO3/ADAM19/HTRA1/EPAS1/FGFR2/NDP/ZFP36L1/ITGB8/GJB5/GJB3/CEBPB/SOCS3/IGF2/PTN/CCN1/PTGS2/ANG/KRT19/JUNB/MME	24
GO:1903844	regulation of cellular response to transforming growth factor beta stimulus	24/1151	150/18903	1.27225e-05	0.000142195	9.135e-05	CAV2/CAV1/EMILIN1/TGFBR3/DKK3/TGFB1I1/MYOCD/ZEB1/LTBP4/LTBP1/CHST11/SPRED1/FBN1/HTRA1/SPRY2/SPRY1/ITGA8/TGFB1/TGFB3/ITGA3/HTRA3/THBS1/FERMT1/DLX1	24
GO:0035265	organ growth	27/1151	180/18903	1.27684e-05	0.000142413	9.14898e-05	FGF2/TGFBR3/ANXA6/DDR2/FOXC1/ACACB/RARB/LEPR/TGFBR2/RARG/PDGFRB/MEF2C/ECM1/FGFR2/SPRY2/FGF7/S1PR1/COL27A1/TGFB2/BCL2/RUNX1/HEG1/DLL1/IGF2/DUSP6/PI16/EDN1	27
GO:0048144	fibroblast proliferation	19/1151	103/18903	1.28333e-05	0.000142545	9.15749e-05	CAV1/DDR2/PDGFC/CD248/GAS6/GSTP1/SFRP1/GNG2/PDGFD/S100A6/PDGFRB/AQP1/PDGFRA/NGFR/CD74/COL3A1/FN1/FOSL2/SOD2	19
GO:1903076	regulation of protein localization to plasma membrane	19/1151	103/18903	1.28333e-05	0.000142545	9.15749e-05	ATP2B4/CLIP3/SORBS1/PRNP/MMP14/EPHA3/STAC/MRAP2/TGFB1/TAMALIN/GBP1/LGALS3/EPHA2/ITGA3/STAC2/PIK3R1/PID1/LRP1/RAMP3	19
GO:1900024	regulation of substrate adhesion-dependent cell spreading	14/1151	61/18903	1.34995e-05	0.000149361	9.59537e-05	FLNA/PDPN/FERMT2/FBLN1/CORO1C/LIMS2/EFNA5/MYADM/ILK/GBP1/KANK1/OLFM4/RAC3/MYOC	14
GO:0002449	lymphocyte mediated immunity	44/1151	367/18903	1.35025e-05	0.000149361	9.59537e-05	SERPING1/C1S/CD40/CLU/C1R/MR1/C7/INPP5D/SERPINB9/CFI/HLA-DOA/TGFB1/RFTN1/GATA3/TNFRSF1B/IL27RA/HLA-E/C3/HLA-DPB1/HLA-DPA1/CD74/AHR/ARID5A/HLA-DRA/KLRB1/IL7R/C1QA/C1QC/HLA-DRB1/C1QB/HLA-DQA1/PTPRC/CEACAM1/CORO1A/CD2/HLA-F/HLA-DQB2/HLA-DRB5/HLA-DQB1/HLA-A/IL6/HLA-DQA2/IGLL5/AZGP1	44
GO:0043500	muscle adaptation	21/1151	122/18903	1.39815e-05	0.000154342	9.91536e-05	ATP2B4/GATM/GSN/PDE5A/SGCA/LMCD1/FOXO1/TNFRSF1B/FBXO32/CYBA/IL6ST/IGFBP5/PRKCA/AIF1/PI16/MYOC/EDN1/CASQ1/ACTA1/NR4A3/TNNC1	21
GO:0007249	I-kappaB kinase/NF-kappaB signaling	37/1151	288/18903	1.40903e-05	0.000155224	9.97202e-05	EDNRA/GJA1/FLNA/LPAR1/ANGPT1/GPRC5B/CD40/CX3CL1/GSTP1/PRKCB/LGALS1/SIRPA/CASP1/ECM1/AJUBA/TRIM22/TLR3/OPTN/S100A4/TLR4/CD74/EDNRB/S100B/CCL21/TNFAIP3/CD4/HLA-DRB1/BIRC3/PYCARD/BST2/SECTM1/LTF/EDN1/PER1/CCL19/UBD/HSPB1	37
GO:0006941	striated muscle contraction	27/1151	181/18903	1.41533e-05	0.0001556	9.99613e-05	GJA1/CAV1/FLNA/KCNJ8/SLC8A1/SYNM/GSN/PDE5A/TPM1/PLN/ABCC9/GJC1/ATP1A2/KCNH2/DMD/STAC/GSTM2/CCN2/STAC2/CASQ2/TRPV4/ATP1B1/DMPK/CXCR4/CASQ1/TNNC1/CHGA	27
GO:0034109	homotypic cell-cell adhesion	18/1151	95/18903	1.47025e-05	0.000160979	0.000103417	FLNA/PDPN/VCL/C1QTNF1/PRKG1/CSRP1/MYL9/PLPP3/TLN1/PDGFRA/ILK/IL6ST/PRKCA/FN1/CCL5/CEACAM1/HSPB1/IL6	18
GO:1990874	vascular associated smooth muscle cell proliferation	18/1151	95/18903	1.47025e-05	0.000160979	0.000103417	FGF2/GJA1/EFEMP2/DDR2/MYOCD/TPM1/MMP2/PRKG1/CNN1/MEF2C/NDRG2/TGFB3/IGFBP5/CALCRL/ADAMTS1/SOD2/EDN1/NR4A3	18
GO:0042552	myelination	23/1151	142/18903	1.56155e-05	0.000170568	0.000109577	TSPAN2/PMP22/LPAR1/JAM2/CNTN1/CLU/MARVELD1/NFASC/RARG/CNTNAP1/ITGB4/JAM3/ID4/ILK/TNFRSF1B/MAL/MPZ/CXCR4/CLDN5/PTN/CST7/MYOC/EGR2	23
GO:0002822	regulation of adaptive immune response based on somatic recombination of immune receptors built from immunoglobulin superfamily domains	27/1151	182/18903	1.56734e-05	0.000170568	0.000109577	IL33/CD40/MR1/MEF2C/TGFB1/GATA3/TNFRSF1B/IL27RA/HLA-E/C3/PLA2G4A/AHR/ANXA1/ARID5A/HLA-DRA/TNFAIP3/IL7R/CD4/HLA-DRB1/PTPRC/CEACAM1/HLA-F/CCL19/HLA-A/IL6/JUNB/AZGP1	27
GO:0097553	calcium ion transmembrane import into cytosol	27/1151	182/18903	1.56734e-05	0.000170568	0.000109577	ATP2B4/FGF2/CAV1/FLNA/SLC8A1/PRNP/JPH2/PLN/CX3CL1/ATP1A2/JPH4/RASA3/DMD/P2RX1/GSTM2/CCN2/BCL2/CYBA/CASQ2/TRPV4/CCL21/RAMP3/PTPRC/CORO1A/CASQ1/ITPR1/CCL19	27
GO:0061900	glial cell activation	13/1151	54/18903	1.57374e-05	0.000170918	0.000109802	SYT11/IL33/CX3CL1/CLU/TLR3/AIF1/C1QA/LRP1/ITGB2/CST7/PTPRC/TYROBP/IL6	13
GO:0050679	positive regulation of epithelial cell proliferation	31/1151	224/18903	1.59159e-05	0.000172508	0.000110824	CAV2/FGF2/FZD7/FGFR1/SFRP1/EYA1/NRP2/BMP4/HTRA1/ECM1/FGFR2/ACVRL1/TP63/FGF7/CYBA/KDR/ID1/PRKCA/CXCL12/CDH3/PROK1/HPN/TNFAIP3/LAMB1/JCAD/IGF2/PTN/CLDN1/ANG/NR4A3/EGR3	31
GO:0045428	regulation of nitric oxide biosynthetic process	14/1151	62/18903	1.64693e-05	0.000178147	0.000114446	ATP2B4/CAV1/PTGIS/RGN/CLU/SIRPA/CD34/TLR4/AIF1/KLF2/SOD2/EDN1/PTGS2/ACP5	14
GO:0048145	regulation of fibroblast proliferation	17/1151	87/18903	1.65484e-05	0.000178643	0.000114765	CAV1/DDR2/PDGFC/CD248/GAS6/GSTP1/SFRP1/PDGFD/S100A6/PDGFRB/AQP1/PDGFRA/NGFR/CD74/FN1/FOSL2/SOD2	17
GO:0002526	acute inflammatory response	20/1151	114/18903	1.66473e-05	0.000179351	0.00011522	ANO6/GSTP1/A2M/GATA3/HLA-E/C3/EDNRB/IL6ST/FN1/ALOX5AP/VCAM1/CEBPB/PLSCR1/SERPINF2/PTGS2/IL6/SAA1/ORM2/NPY/ORM1	20
GO:0014033	neural crest cell differentiation	18/1151	96/18903	1.70796e-05	0.00018364	0.000117975	EDNRA/ANXA6/ISL1/FOXC1/EFNB1/CORO1C/SFRP1/ALDH1A2/NRP2/SNAI2/BMP4/MEF2C/EDNRB/EDN3/FN1/FRZB/EDN1/SEMA3C	18
GO:0001774	microglial cell activation	12/1151	47/18903	1.75307e-05	0.000188114	0.000120849	SYT11/IL33/CX3CL1/CLU/TLR3/AIF1/C1QA/ITGB2/CST7/PTPRC/TYROBP/IL6	12
GO:1901888	regulation of cell junction assembly	29/1151	204/18903	1.77203e-05	0.000189769	0.000121913	CAV1/FERMT2/MMP14/VCL/CORO1C/NLGN3/EPHA3/SFRP1/GPM6B/COL16A1/EFNA5/FAM107A/NTN1/SNAI2/TLN1/MEF2C/ACVRL1/FLRT3/EPHA2/KDR/SLITRK6/HOPX/CLDN5/DKK1/THBS1/AMIGO2/MYOC/CLDN1/THBS2	29
GO:0032060	bleb assembly	6/1151	11/18903	1.78253e-05	0.000190137	0.000122149	MYLK/PMP22/LPAR1/ANO6/EMP3/EMP1	6
GO:0098883	synapse pruning	6/1151	11/18903	1.78253e-05	0.000190137	0.000122149	CX3CL1/C3/C1QA/C1QC/DKK1/C1QB	6
GO:0060973	cell migration involved in heart development	8/1151	21/18903	1.83752e-05	0.000194953	0.000125243	EDNRA/SNAI2/BMP4/PDGFRB/DCHS1/FLRT3/EDN1/SEMA3C	8
GO:0071636	positive regulation of transforming growth factor beta production	8/1151	21/18903	1.83752e-05	0.000194953	0.000125243	CX3CL1/CD200/CD34/LUM/THBS1/FERMT1/SERPINF2/PTGS2	8
GO:0006909	phagocytosis	39/1151	314/18903	1.83856e-05	0.000194953	0.000125243	AXL/SYT11/GSN/RAB31/CORO1C/ANO6/GAS6/LEPR/RAB7B/MFGE8/MET/CNN2/SRPX/SIRPA/DYSF/RAB34/CD93/CYBA/C3/TLR4/PECAM1/ANXA1/CD14/AIF1/ITGA2/LRP1/ITGB2/PLSCR1/RAC2/PYCARD/PTPRC/CORO1A/THBS1/TYROBP/CCL2/IL2RG/TGM2/IGLL5/SPON2	39
GO:0042403	thyroid hormone metabolic process	9/1151	27/18903	1.92258e-05	0.000203061	0.000130452	SLC16A2/CTSB/CTSK/GATA3/DUOX1/DUOXA1/DIO2/CPQ/HPN	9
GO:1903055	positive regulation of extracellular matrix organization	9/1151	27/18903	1.92258e-05	0.000203061	0.000130452	PDPN/EFEMP2/EMILIN1/DDR2/PHLDB1/TGFB1/RUNX1/RGCC/IL6	9
GO:2000379	positive regulation of reactive oxygen species metabolic process	15/1151	71/18903	1.94624e-05	0.000204435	0.000131335	GSTP1/TGFBR2/PDGFRB/TGFB1/CYBA/TLR4/DUOXA1/GADD45A/PID1/ITGB2/THBS1/TYROBP/SOD2/CD177/CYP1B1	15
GO:0070169	positive regulation of biomineral tissue development	13/1151	55/18903	1.947e-05	0.000204435	0.000131335	SLC8A1/ANO6/GPM6B/BMP4/MEF2C/TGFB1/TGFB3/TMEM119/CEBPB/CFTR/PTN/CCN1/LTF	13
GO:0071385	cellular response to glucocorticoid stimulus	13/1151	55/18903	1.947e-05	0.000204435	0.000131335	SERPINF1/ISL1/FAM107A/AQP1/ZFP36L1/FBXO32/ZFP36L2/NR3C1/ANXA1/EDN1/DDIT4/ZFP36/CYP1B1	13
GO:0048863	stem cell differentiation	33/1151	248/18903	1.96316e-05	0.00020573	0.000132166	EDNRA/FGF2/ANXA6/MYOCD/ISL1/FOXC1/EFNB1/CORO1C/SFRP1/ALDH1A2/NRP2/SNAI2/BMP4/MEF2C/PDGFRA/FGFR2/TP63/A2M/KIT/LTBP3/ZFP36L2/TGFB2/BCL2/SFRP2/EDNRB/EDN3/FN1/FRZB/PTN/PTPRC/EDN1/SEMA3C/ZFP36	33
GO:0030177	positive regulation of Wnt signaling pathway	23/1151	144/18903	1.97091e-05	0.00020614	0.00013243	FGF2/CAV1/ADGRA2/DAAM2/GPRC5B/SULF2/DACT1/SFRP1/RSPO3/FGFR2/ILK/TGFB1/KANK1/SULF1/DIXDC1/SFRP2/LGR6/PLEKHA4/CDH3/GPC3/TNFAIP3/DKK1/COL1A1	23
GO:0001657	ureteric bud development	18/1151	97/18903	1.97943e-05	0.000206629	0.000132744	FGF2/FOXC1/TCF21/RARB/SFRP1/EYA1/GLI3/BMP4/HOXD11/DCHS1/FGFR2/SPRY1/ILK/PBX1/GATA3/BCL2/GPC3/SDC1	18
GO:0008544	epidermis development	43/1151	362/18903	2.11454e-05	0.000220305	0.00014153	FGF2/PALLD/FOXC1/FST/CLIC4/LDB2/BMP4/FGFR2/NGFR/TP63/FGF7/COL17A1/ZFP36L1/CCN2/EPHA2/LAMB3/TGFB2/BCL2/SLITRK6/IGFBP5/ANXA1/KRT5/CDH3/GJB5/DLL1/KRT15/CRABP2/FOSL2/EMP1/HLA-DRB1/DKK1/KRT7/FERMT1/FOXQ1/CSTA/KRT17/KRT4/COL7A1/KRT14/AQP3/ZFP36/PLAAT4/ALOX15B	43
GO:0043434	response to peptide hormone	48/1151	421/18903	2.12411e-05	0.000220875	0.000141896	CAV2/EDNRA/CAV1/TGFBR3/SORBS1/DDR2/RAB31/TWIST2/SRD5A2/SLC2A4/PRKCB/RARRES2/FOXO1/FBN1/MAP1B/CTSK/ZFP36L1/CCN2/TIMP1/KANK1/CYBA/PDK4/EDNRB/SCNN1A/TRPV4/IGFBP5/ANXA1/COL3A1/PIK3R1/CXCL12/PID1/SOCS3/IRS1/IGF2/CYBB/CEACAM1/BTG2/COL1A1/TIMP4/EDN1/ALPL/PTGS2/EGR1/SCNN1G/FOS/EGR2/NR4A3/CYP1B1	48
GO:0045651	positive regulation of macrophage differentiation	7/1151	16/18903	2.14186e-05	0.000221862	0.00014253	ROR2/CSF1/IL34/TGFB1/PRKCA/HCLS1/ID2	7
GO:2000095	regulation of Wnt signaling pathway, planar cell polarity pathway	7/1151	16/18903	2.14186e-05	0.000221862	0.00014253	DACT1/SFRP1/RSPO3/SFRP2/PLEKHA4/GPC3/DKK1	7
GO:0071230	cellular response to amino acid stimulus	16/1151	80/18903	2.14933e-05	0.000222207	0.000142752	PDGFC/COL6A1/ZEB1/MMP2/COL4A6/COL16A1/PDGFD/PDGFRA/COL4A1/COL1A2/CYBA/COL3A1/CEBPB/CYBB/COL1A1/COL5A2	16
GO:0046850	regulation of bone remodeling	12/1151	48/18903	2.20893e-05	0.000227931	0.000146429	LEPR/SFRP1/INPP5D/CSF1R/S1PR1/LTBP3/TMEM119/PDK4/PRKCA/TNFAIP3/IL6/CD38	12
GO:0071496	cellular response to external stimulus	40/1151	328/18903	2.21575e-05	0.000228197	0.0001466	KANK2/FGF2/AXL/MYOCD/IL33/CD40/IFI16/GAS6/ATP1A2/SFRP1/FAM107A/CNN2/SNAI2/PDE2A/FOXO1/AQP1/CASP1/CTSK/TLR3/BCL2/CYBA/SFRP2/PDK4/TLR4/GADD45A/NUAK1/VCAM1/AIF1/ITGA2/FOLR2/PENK/PTPRC/KLF10/POSTN/COL1A1/PTGS2/AQP3/FOS/AOC1/ATF3	40
GO:0071229	cellular response to acid chemical	17/1151	89/18903	2.25944e-05	0.000232251	0.000149204	PDGFC/COL6A1/ZEB1/MMP2/COL4A6/COL16A1/PDGFD/PDGFRA/COL4A1/COL1A2/CYBA/COL3A1/CEBPB/KLF2/CYBB/COL1A1/COL5A2	17
GO:0072163	mesonephric epithelium development	18/1151	98/18903	2.28875e-05	0.000234368	0.000150564	FGF2/FOXC1/TCF21/RARB/SFRP1/EYA1/GLI3/BMP4/HOXD11/DCHS1/FGFR2/SPRY1/ILK/PBX1/GATA3/BCL2/GPC3/SDC1	18
GO:0072164	mesonephric tubule development	18/1151	98/18903	2.28875e-05	0.000234368	0.000150564	FGF2/FOXC1/TCF21/RARB/SFRP1/EYA1/GLI3/BMP4/HOXD11/DCHS1/FGFR2/SPRY1/ILK/PBX1/GATA3/BCL2/GPC3/SDC1	18
GO:0110110	positive regulation of animal organ morphogenesis	10/1151	34/18903	2.30058e-05	0.000235132	0.000151055	FGF2/CSF1/BMP4/ROBO1/NGFR/SPRY1/GATA3/CD34/DKK1/EDN1	10
GO:0071695	anatomical structure maturation	33/1151	250/18903	2.31791e-05	0.000236453	0.000151904	EDNRA/AXL/NPR2/MMP2/CX3CL1/ALDH1A2/AKR1B1/DCHS1/EPAS1/ACVRL1/GATA3/S1PR1/CEND1/NTN4/TGFB2/BCL2/C3/KDR/EDNRB/CDH3/CCL21/CFTR/KLF2/C1QA/DEFB1/TFCP2L1/FERMT1/RAC3/MYOC/LTF/EDN1/CCL19/ANG	33
GO:0034767	positive regulation of ion transmembrane transport	27/1151	186/18903	2.33525e-05	0.000237771	0.00015275	EDNRA/CAV1/FLNA/KCNMB1/JPH2/RGN/CX3CL1/ANO6/NLGN3/ATP1B2/KCNH2/ABCB1/DMD/STAC/P2RX1/GSTM2/STAC2/EDN3/ATP1B1/CTSS/CFTR/RAMP3/CCL2/EDN1/CASQ1/KCNK3/CACNG4	27
GO:0046688	response to copper ion	11/1151	41/18903	2.36055e-05	0.000239893	0.000154114	PRNP/AQP1/PAM/LOXL2/MT1A/SOD3/MT1X/AOC1/MT1M/MT1E/MT1G	11
GO:0001954	positive regulation of cell-matrix adhesion	13/1151	56/18903	2.3956e-05	0.000242082	0.00015552	EFEMP2/FERMT2/PLEKHA2/CX3CL1/CSF1/SFRP1/COL16A1/KDR/RRAS/CCL21/CD3E/FERMT1/MYOC	13
GO:0110151	positive regulation of biomineralization	13/1151	56/18903	2.3956e-05	0.000242082	0.00015552	SLC8A1/ANO6/GPM6B/BMP4/MEF2C/TGFB1/TGFB3/TMEM119/CEBPB/CFTR/PTN/CCN1/LTF	13
GO:2000630	positive regulation of miRNA metabolic process	13/1151	56/18903	2.3956e-05	0.000242082	0.00015552	FGF2/MYOCD/NGFR/TGFB1/GATA3/TEAD1/TGFB2/NR3C1/ETS1/KLF5/ATOH8/EGR1/FOS	13
GO:0050918	positive chemotaxis	14/1151	64/18903	2.41809e-05	0.000243896	0.000156685	FGF2/ANGPT1/CX3CL1/MET/BMP4/FGF7/LGALS3/S1PR1/KDR/CXCL12/ITGA2/CCL5/CORO1A/GPNMB	14
GO:0019221	cytokine-mediated signaling pathway	54/1151	496/18903	2.46096e-05	0.000247755	0.000159165	CAV1/AXL/ANGPT1/FOXC1/IL33/CX3CL1/CSF1/GAS6/GSTP1/STING1/LEPR/CASP1/IL34/ECM1/ROBO1/CSF1R/PLP2/ILK/CCDC3/TNFRSF1B/KIT/IL27RA/DUOX1/CD74/IL6ST/IFITM3/CXCL12/ACKR1/CCL21/IFITM2/CNTFR/TNFAIP3/CXCR4/IL7R/CCL5/LAPTM5/CD4/BIRC3/IFITM1/ACKR3/CXCL6/PYCARD/PTPRC/CEACAM1/PLVAP/CCL2/EDN1/IL2RG/CXCL1/CCL19/MX1/CXCL2/EGR1/IL6	54
GO:0061326	renal tubule development	18/1151	99/18903	2.64045e-05	0.000265328	0.000170454	FGF2/TCF21/WWTR1/EYA1/GLI3/BMP4/HOXD11/AQP1/DCHS1/MEF2C/ILK/PBX1/GATA3/COL4A1/BCL2/GPC3/DLL1/HEYL	18
GO:2001044	regulation of integrin-mediated signaling pathway	8/1151	22/18903	2.73368e-05	0.000274184	0.000176143	FLNA/NID1/LIMS2/LAMA2/TIMP1/LAMB1/LAMB2/CD177	8
GO:0060415	muscle tissue morphogenesis	15/1151	73/18903	2.75946e-05	0.000275229	0.000176814	EDNRA/MYLK/EFEMP2/TGFBR3/ISL1/FOXC1/TPM1/FGFR2/TGFB1/S1PR1/ACTC1/TGFB2/COL3A1/HEG1/TNNC1	15
GO:0071260	cellular response to mechanical stimulus	15/1151	73/18903	2.75946e-05	0.000275229	0.000176814	FGF2/IL33/CD40/ATP1A2/CNN2/PDE2A/AQP1/CASP1/TLR3/CYBA/TLR4/GADD45A/ITGA2/COL1A1/PTGS2	15
GO:0071677	positive regulation of mononuclear cell migration	15/1151	73/18903	2.75946e-05	0.000275229	0.000176814	JAM2/CSF1/ANO6/GAS6/PDGFD/LGALS3/S100A14/CXCL12/CCL21/AIF1/CCL5/PYCARD/CORO1A/CXCL17/SERPINE1	15
GO:0017015	regulation of transforming growth factor beta receptor signaling pathway	23/1151	147/18903	2.76766e-05	0.000275536	0.000177012	CAV2/CAV1/EMILIN1/TGFBR3/DKK3/TGFB1I1/MYOCD/ZEB1/LTBP4/LTBP1/CHST11/SPRED1/FBN1/HTRA1/SPRY2/SPRY1/ITGA8/TGFB1/TGFB3/ITGA3/HTRA3/THBS1/FERMT1	23
GO:0050830	defense response to Gram-positive bacterium	20/1151	118/18903	2.80446e-05	0.000278683	0.000179033	GBP2/MR1/RARRES2/SSC5D/IL27RA/EPHA2/HLA-E/RNASE6/RNASE1/MPEG1/IL7R/PYCARD/DEFB1/GBP4/HLA-A/ANG/LYZ/IL6/ACP5/CHGA	20
GO:0044703	multi-organism reproductive process	29/1151	209/18903	2.81125e-05	0.000278843	0.000179136	GJA1/SYDE1/FBLN1/ACSL4/MMP2/ITGA5/TGFBR2/COL16A1/CTSB/ITGB4/IGFBP7/PAM/P2RX1/NDP/TIMP1/TGFB3/BCL2/ITGA3/IGFBP5/THBD/ITGA2/PTN/EDN1/PTGS2/SCGB1A1/FOS/JUNB/CD38/FOSB	29
GO:0048736	appendage development	26/1151	178/18903	2.94403e-05	0.000290937	0.000186906	FERMT2/PRRX1/HOXD13/RARB/ALDH1A2/MAP3K20/RARG/GLI3/CHST11/SMOC1/BMP4/ITGB4/HOXD10/FGFR2/PAM/TP63/PBX1/TGFB2/SFRP2/COL3A1/GPC3/CRABP2/HOXD9/DKK1/SEMA3C/SP8	26
GO:0060173	limb development	26/1151	178/18903	2.94403e-05	0.000290937	0.000186906	FERMT2/PRRX1/HOXD13/RARB/ALDH1A2/MAP3K20/RARG/GLI3/CHST11/SMOC1/BMP4/ITGB4/HOXD10/FGFR2/PAM/TP63/PBX1/TGFB2/SFRP2/COL3A1/GPC3/CRABP2/HOXD9/DKK1/SEMA3C/SP8	26
GO:0042116	macrophage activation	19/1151	109/18903	2.94942e-05	0.000290937	0.000186906	SYT11/IL33/CX3CL1/CLU/DYSF/CD200/TLR3/CD93/PLA2G4A/TLR4/CD74/AIF1/C1QA/ITGB2/CST7/PTPRC/THBS1/TYROBP/IL6	19
GO:0046683	response to organophosphorus	21/1151	128/18903	2.96112e-05	0.000291556	0.000187303	NT5E/SLC8A1/LPAR1/ABCC9/PDE2A/AQP1/P2RX1/ZFP36L1/DUOX1/AHR/IGFBP5/THBD/CFTR/PENK/COL1A1/SDC1/PER1/PTGS2/FOS/CYP1B1/FOSB	21
GO:0046209	nitric oxide metabolic process	16/1151	82/18903	2.96666e-05	0.000291568	0.000187311	ATP2B4/CAV1/PTGIS/RGN/CLU/SIRPA/CD34/TLR4/AIF1/KLF2/SOD2/EDN1/PTGS2/ACP5/CYP1B1/NPY	16
GO:0097306	cellular response to alcohol	18/1151	100/18903	3.03947e-05	0.000297737	0.000191274	ADCY5/KCNMB1/PTGER2/CES1/SFRP1/ADCY3/GNG2/EFNA5/SCNN1A/AHR/CFTR/KLF2/CYBB/SOD2/SGK1/SCNN1G/FOS/CYP1B1	18
GO:0048730	epidermis morphogenesis	10/1151	35/18903	3.04604e-05	0.000297737	0.000191274	FST/FGFR2/NGFR/TP63/FGF7/TGFB2/BCL2/IGFBP5/FOXQ1/KRT17	10
GO:0090075	relaxation of muscle	10/1151	35/18903	3.04604e-05	0.000297737	0.000191274	SLC8A1/GSN/PDE5A/PLN/KCNMA1/PRKG1/ATP1A2/GSTM2/ATP1B1/CHGA	10
GO:0045619	regulation of lymphocyte differentiation	29/1151	210/18903	3.07596e-05	0.000300115	0.000192802	AXL/MMP14/VSIR/ZEB1/GAS6/SFRP1/TGFBR2/SMARCD3/GLI3/INPP5D/BMP4/FGL2/HLA-DOA/ZFP36L1/GATA3/ZFP36L2/RUNX1/CD74/ANXA1/HLA-DRA/IL7R/HLA-DRB1/PTPRC/CD2/IL2RG/CCL19/ID2/EGR3/JUNB	29
GO:0007565	female pregnancy	27/1151	189/18903	3.1195e-05	0.000303812	0.000195177	GJA1/SYDE1/FBLN1/ACSL4/MMP2/ITGA5/TGFBR2/COL16A1/CTSB/ITGB4/IGFBP7/PAM/NDP/TIMP1/TGFB3/BCL2/ITGA3/IGFBP5/THBD/ITGA2/PTN/PTGS2/SCGB1A1/FOS/JUNB/CD38/FOSB	27
GO:0006801	superoxide metabolic process	15/1151	74/18903	3.26853e-05	0.000316036	0.00020303	SH3PXD2B/GSTP1/FBLN5/SH3PXD2A/TGFB1/CYBA/DUOX1/ITGB2/CYBB/TYROBP/SOD2/EDN1/SOD3/CD177/ACP5	15
GO:0048662	negative regulation of smooth muscle cell proliferation	15/1151	74/18903	3.26853e-05	0.000316036	0.00020303	EFEMP2/OGN/MYOCD/TPM1/PRKG1/CNN1/MEF2C/NDRG2/TGFB3/IGFBP5/AIF1/TNFAIP3/IGFBP3/SOD2/ANG	15
GO:0051145	smooth muscle cell differentiation	15/1151	74/18903	3.26853e-05	0.000316036	0.00020303	EDNRA/EFEMP2/FOXF1/MYOCD/ZEB1/SGCB/NFATC4/BMP4/MEF2C/FGFR2/ITGA8/KIT/RBPMS2/EDNRB/SOD2	15
GO:2000628	regulation of miRNA metabolic process	15/1151	74/18903	3.26853e-05	0.000316036	0.00020303	FGF2/MYOCD/NFATC4/BMP4/NGFR/TGFB1/GATA3/TEAD1/TGFB2/NR3C1/ETS1/KLF5/ATOH8/EGR1/FOS	15
GO:0001886	endothelial cell morphogenesis	6/1151	12/18903	3.38095e-05	0.000325734	0.00020926	MET/CLIC4/COL18A1/COL15A1/HEG1/ARHGEF26	6
GO:0061517	macrophage proliferation	6/1151	12/18903	3.38095e-05	0.000325734	0.00020926	IL33/CX3CL1/CLU/CSF1/IL34/CSF1R	6
GO:0042326	negative regulation of phosphorylation	44/1151	381/18903	3.39756e-05	0.000326517	0.000209763	CAV1/EMILIN1/SLC8A1/PRNP/DDR2/MYOCD/ANGPT1/KIRREL1/RGN/FBLN1/CORO1C/GSTP1/PLPP3/SFRP1/WWTR1/SPRED1/BMP4/SIRPA/MYADM/DMD/AJUBA/SPRY2/SPRY1/TGFB1/PKIG/MVP/SFRP2/GADD45A/HEG1/PID1/TNFAIP3/LRP1/SOCS3/DKK1/IGFBP3/PYCARD/DUSP6/PTPRC/CEACAM1/DUSP1/PTPRT/HSPB1/DDIT4/GADD45B	44
GO:0002269	leukocyte activation involved in inflammatory response	12/1151	50/18903	3.43783e-05	0.000326517	0.000209763	SYT11/IL33/CX3CL1/CLU/TLR3/AIF1/C1QA/ITGB2/CST7/PTPRC/TYROBP/IL6	12
GO:0038084	vascular endothelial growth factor signaling pathway	12/1151	50/18903	3.43783e-05	0.000326517	0.000209763	ADGRA2/FOXC1/NRP2/DCN/PDGFRB/PDGFRA/ROBO1/SPRY2/KDR/DLL1/JCAD/HSPB1	12
GO:2001238	positive regulation of extrinsic apoptotic signaling pathway	12/1151	50/18903	3.43783e-05	0.000326517	0.000209763	CAV1/SFRP1/SRPX/TIMP3/ITM2C/MAL/G0S2/PYCARD/PTPRC/THBS1/TNFRSF12A/ATF3	12
GO:0016525	negative regulation of angiogenesis	23/1151	149/18903	3.44903e-05	0.000326517	0.000209763	ATP2B4/SERPINF1/EMILIN1/FOXC1/COL4A2/DCN/SPRED1/SPRY2/EPHA2/STAB1/SULF1/TGFB2/SPARC/GADD45A/CLDN5/HSPG2/RGCC/KLF2/AMOT/THBS1/ADAMTS1/THBS2/SERPINE1	23
GO:0010763	positive regulation of fibroblast migration	7/1151	17/18903	3.4498e-05	0.000326517	0.000209763	SLC8A1/ACTA2/DDR2/AQP1/TGFB1/AKAP12/THBS1	7
GO:0045019	negative regulation of nitric oxide biosynthetic process	7/1151	17/18903	3.4498e-05	0.000326517	0.000209763	ATP2B4/CAV1/PTGIS/RGN/SIRPA/CD34/ACP5	7
GO:0048557	embryonic digestive tract morphogenesis	7/1151	17/18903	3.4498e-05	0.000326517	0.000209763	FOXF1/TCF21/GLI3/PDGFRA/FGFR2/RBPMS2/ID2	7
GO:0072224	metanephric glomerulus development	7/1151	17/18903	3.4498e-05	0.000326517	0.000209763	TCF21/PDGFRB/AQP1/PDGFRA/CD34/LAMB2/EGR1	7
GO:1904406	negative regulation of nitric oxide metabolic process	7/1151	17/18903	3.4498e-05	0.000326517	0.000209763	ATP2B4/CAV1/PTGIS/RGN/SIRPA/CD34/ACP5	7
GO:2001057	reactive nitrogen species metabolic process	16/1151	83/18903	3.47011e-05	0.000327147	0.000210168	ATP2B4/CAV1/PTGIS/RGN/CLU/SIRPA/CD34/TLR4/AIF1/KLF2/SOD2/EDN1/PTGS2/ACP5/CYP1B1/NPY	16
GO:0060560	developmental growth involved in morphogenesis	31/1151	233/18903	3.47452e-05	0.000327147	0.000210168	EDNRA/VCL/DPYSL2/CSF1/RND2/NLGN3/HOXD13/SFRP1/TGFBR2/EFNA5/RARG/NTN1/NRP2/BMP4/MAP1B/FGFR2/SPRY2/SPRY1/FLRT3/S1PR1/SPART/SFRP2/NDN/EDN3/CXCL12/FN1/CRABP2/CXCR4/LAMB2/EDN1/SEMA3C	31
GO:0043122	regulation of I-kappaB kinase/NF-kappaB signaling	33/1151	255/18903	3.47472e-05	0.000327147	0.000210168	GJA1/FLNA/LPAR1/ANGPT1/GPRC5B/CD40/CX3CL1/GSTP1/PRKCB/LGALS1/CASP1/ECM1/AJUBA/TRIM22/TLR3/OPTN/S100A4/TLR4/CD74/S100B/CCL21/TNFAIP3/CD4/HLA-DRB1/BIRC3/PYCARD/BST2/SECTM1/LTF/PER1/CCL19/UBD/HSPB1	33
GO:0010517	regulation of phospholipase activity	14/1151	66/18903	3.49005e-05	0.000328016	0.000210726	EDNRA/FGF2/LPAR1/FGFR1/PDGFRB/PDGFRA/FGFR2/KIT/ANXA1/LRP1/CCL5/CCN1/SELE/ANG	14
GO:0043270	positive regulation of ion transport	36/1151	289/18903	3.5738e-05	0.000335301	0.000215406	EDNRA/CAV1/FLNA/MYLK/KCNMB1/JPH2/RGN/FHL1/CNTN1/CX3CL1/ANO6/NLGN3/ATP1B2/KCNH2/PDGFRB/ABCB1/DMD/STAC/P2RX1/GSTM2/LGALS3/PLA2G4A/STAC2/EDN3/ATP1B1/CXCL12/CTSS/CEBPB/CFTR/CCL5/RAMP3/CCL2/EDN1/CASQ1/KCNK3/CACNG4	36
GO:1904062	regulation of cation transmembrane transport	45/1151	394/18903	3.64766e-05	0.000341635	0.000219475	EDNRA/ATP2B4/STOM/CAV1/FLNA/KCNMB1/SLC8A1/PRNP/JPH2/RGN/PLN/FHL1/ABCC9/CX3CL1/ANO6/NLGN3/ATP1A2/JPH4/FXYD6/ATP1B2/KCNH2/MEF2C/KCNAB1/DMD/STAC/GEM/P2RX1/GSTM2/BCL2/CYBA/STAC2/CASQ2/FXYD5/EDN3/ATP1B1/CTSS/RAMP3/AHNAK/RRAD/CORO1A/CCL2/EDN1/CASQ1/KCNK3/CACNG4	45
GO:0090025	regulation of monocyte chemotaxis	9/1151	29/18903	3.67798e-05	0.000343875	0.000220915	ANO6/S100A14/CXCL12/AIF1/CCL5/CXCL17/NBL1/DUSP1/SERPINE1	9
GO:0014066	regulation of phosphatidylinositol 3-kinase signaling	19/1151	111/18903	3.83172e-05	0.000356494	0.000229021	FGF2/PDGFC/ANGPT1/FGFR1/ROR2/PDGFD/DCN/PDGFRB/PDGFRA/SELP/UNC5B/KIT/TGFB2/KDR/HCLS1/FN1/CCL5/CEACAM1/MYOC	19
GO:0071347	cellular response to interleukin-1	19/1151	111/18903	3.83172e-05	0.000356494	0.000229021	PTGIS/CD40/MMP2/CX3CL1/GBP2/SFRP1/SIRPA/GBP1/CCL21/AKAP12/CEBPB/KLF2/CCL5/PYCARD/CCL2/EDN1/CCL19/EGR1/IL6	19
GO:0007266	Rho protein signal transduction	22/1151	140/18903	3.83285e-05	0.000356494	0.000229021	KANK2/PDPN/LPAR1/CDC42EP3/ARHGEF25/STARD8/RHOJ/MET/ARHGEF2/NTN1/PDGFRB/ROBO1/CDC42EP4/NGFR/KANK1/COL1A2/ITGA3/RHOB/COL3A1/HEG1/MYOC/CDC42EP5	22
GO:0001823	mesonephros development	18/1151	102/18903	4.00174e-05	0.00037156	0.0002387	FGF2/FOXC1/TCF21/RARB/SFRP1/EYA1/GLI3/BMP4/HOXD11/DCHS1/FGFR2/SPRY1/ILK/PBX1/GATA3/BCL2/GPC3/SDC1	18
GO:0021675	nerve development	16/1151	84/18903	4.04756e-05	0.000375167	0.000241017	EDNRA/LPAR1/ISL1/SULF2/NAV2/GLI3/NRP2/NGFR/ILK/SULF1/HOXB2/SLITRK6/VCAM1/ACKR3/EDN1/EGR2	16
GO:0045666	positive regulation of neuron differentiation	17/1151	93/18903	4.08437e-05	0.000377927	0.00024279	FGF2/FGFR1/GPRC5B/ZEB1/FEZ1/ARHGEF2/BMP4/MEF2C/MAP1B/PCP4/DUOXA1/CXCL12/HEYL/DKK1/NBL1/ADRA2C/DLX1	17
GO:1904064	positive regulation of cation transmembrane transport	25/1151	171/18903	4.09606e-05	0.000378358	0.000243067	EDNRA/CAV1/FLNA/KCNMB1/JPH2/RGN/CX3CL1/ANO6/NLGN3/ATP1B2/KCNH2/DMD/STAC/P2RX1/GSTM2/STAC2/EDN3/ATP1B1/CTSS/RAMP3/CCL2/EDN1/CASQ1/KCNK3/CACNG4	25
GO:0031638	zymogen activation	14/1151	67/18903	4.16756e-05	0.000383644	0.000246463	MMP14/VSIR/IFI16/C1R/ANXA2/RUNX1/PLAU/THBD/HPN/CLEC3B/PYCARD/THBS1/SERPINF2/SERPINE1	14
GO:0070613	regulation of protein processing	14/1151	67/18903	4.16756e-05	0.000383644	0.000246463	SPON1/PRNP/MMP14/GSN/GAS1/ANXA2/RUNX1/PLAU/HPN/CLEC3B/CST7/THBS1/SERPINF2/SERPINE1	14
GO:2000181	negative regulation of blood vessel morphogenesis	23/1151	151/18903	4.27744e-05	0.000393086	0.000252529	ATP2B4/SERPINF1/EMILIN1/FOXC1/COL4A2/DCN/SPRED1/SPRY2/EPHA2/STAB1/SULF1/TGFB2/SPARC/GADD45A/CLDN5/HSPG2/RGCC/KLF2/AMOT/THBS1/ADAMTS1/THBS2/SERPINE1	23
GO:0043903	regulation of biological process involved in symbiotic interaction	13/1151	59/18903	4.32701e-05	0.000396286	0.000254585	CAV1/GSN/LGALS1/TRIM22/CD74/CH25H/IFITM3/IFITM2/CD4/HLA-DRB1/IFITM1/CXCL6/LTF	13
GO:1903078	positive regulation of protein localization to plasma membrane	13/1151	59/18903	4.32701e-05	0.000396286	0.000254585	ATP2B4/CLIP3/SORBS1/PRNP/EPHA3/STAC/LGALS3/EPHA2/ITGA3/STAC2/PIK3R1/LRP1/RAMP3	13
GO:0002253	activation of immune response	45/1151	397/18903	4.38733e-05	0.000401127	0.000257695	PRNP/SERPING1/CFH/C1S/CLU/IFI16/C1R/STING1/MASP1/C7/INPP5D/PRKCB/MFAP4/MEF2C/CFI/RFTN1/A2M/GBP1/GATA3/LGALS3/BCL2/C3/HLA-DPB1/TLR4/VTCN1/RGCC/C1QA/CD3E/LAPTM5/C1QC/HLA-DRB1/PLSCR1/PYCARD/C1QB/CFD/PTPRC/CEACAM1/TYROBP/CFB/CD3D/HLA-DQB1/HLA-A/NR4A3/IGLL5/CD38	45
GO:0006809	nitric oxide biosynthetic process	15/1151	76/18903	4.54011e-05	0.000414391	0.000266216	ATP2B4/CAV1/PTGIS/RGN/CLU/SIRPA/CD34/TLR4/AIF1/KLF2/SOD2/EDN1/PTGS2/ACP5/CYP1B1	15
GO:0021700	developmental maturation	37/1151	304/18903	4.63329e-05	0.000422179	0.000271219	EDNRA/AXL/CHRDL1/NPR2/MMP2/CX3CL1/ALDH1A2/NFATC4/RAB38/AKR1B1/DCHS1/MAP1B/EPAS1/ACVRL1/GATA3/S1PR1/CEND1/NTN4/TGFB2/BCL2/C3/KDR/EDNRB/CDH3/CCL21/CFTR/KLF2/C1QA/DEFB1/TFCP2L1/FERMT1/RAC3/MYOC/LTF/EDN1/CCL19/ANG	37
GO:0001558	regulation of cell growth	47/1151	422/18903	4.64975e-05	0.000422962	0.000271722	GJA1/MYOCD/DACT3/MMP14/RERG/FHL1/DPYSL2/IGFBP4/RND2/WFDC1/LTBP4/SFRP1/CRYAB/EFNA5/FAM107A/TNC/NTN1/RASGRP2/FBLN5/IGFBP7/MAP1B/ACVRL1/TGFB1/TEAD1/SPART/TGFB2/BCL2/CYBA/SFRP2/IGFBP5/CXCL12/FN1/HPN/CRABP2/CXCR4/FRZB/IGFBP3/BST2/SCGB3A1/PI16/CEACAM1/KRT17/EDN1/S100A9/SEMA3C/SGK1/CD38	47
GO:0050792	regulation of viral process	24/1151	162/18903	4.66291e-05	0.000423442	0.00027203	STOM/AXL/APOBEC3C/GSN/IFI16/LGALS1/APOBEC3G/MDFIC/TRIM22/BCL2/CD74/CH25H/IFITM3/IFITM2/CXCR4/CCL5/CD4/HLA-DRB1/PLSCR1/IFITM1/BST2/LTF/MX1/ZFP36	24
GO:1901343	negative regulation of vasculature development	23/1151	152/18903	4.75511e-05	0.000431087	0.000276942	ATP2B4/SERPINF1/EMILIN1/FOXC1/COL4A2/DCN/SPRED1/SPRY2/EPHA2/STAB1/SULF1/TGFB2/SPARC/GADD45A/CLDN5/HSPG2/RGCC/KLF2/AMOT/THBS1/ADAMTS1/THBS2/SERPINE1	23
GO:0014074	response to purine-containing compound	22/1151	142/18903	4.78428e-05	0.000431549	0.000277238	NT5E/SLC8A1/ABCC9/PDE2A/AQP1/P2RX1/GSTM2/ZFP36L1/DUOX1/CASQ2/AHR/IGFBP5/THBD/CFTR/PENK/COL1A1/SDC1/PER1/PTGS2/FOS/CYP1B1/FOSB	22
GO:0035107	appendage morphogenesis	22/1151	142/18903	4.78428e-05	0.000431549	0.000277238	PRRX1/HOXD13/RARB/ALDH1A2/MAP3K20/RARG/GLI3/CHST11/BMP4/HOXD10/FGFR2/TP63/PBX1/TGFB2/SFRP2/COL3A1/GPC3/CRABP2/HOXD9/DKK1/SEMA3C/SP8	22
GO:0035108	limb morphogenesis	22/1151	142/18903	4.78428e-05	0.000431549	0.000277238	PRRX1/HOXD13/RARB/ALDH1A2/MAP3K20/RARG/GLI3/CHST11/BMP4/HOXD10/FGFR2/TP63/PBX1/TGFB2/SFRP2/COL3A1/GPC3/CRABP2/HOXD9/DKK1/SEMA3C/SP8	22
GO:0010092	specification of animal organ identity	10/1151	37/18903	5.16993e-05	0.000462455	0.000297093	FGF2/ISL1/SMARCD3/GLI3/BMP4/MEF2C/ROBO1/FGFR2/SPRY1/DKK1	10
GO:0044319	wound healing, spreading of cells	10/1151	37/18903	5.16993e-05	0.000462455	0.000297093	FLNA/PDPN/FERMT2/ITGA5/AJUBA/COL5A1/ACVRL1/CEACAM1/FERMT1/CCN1	10
GO:0050931	pigment cell differentiation	10/1151	37/18903	5.16993e-05	0.000462455	0.000297093	MITF/RAB38/GLI3/MEF2C/KIT/BCL2/EDNRB/EDN3/SOD2/OR51E2	10
GO:0051385	response to mineralocorticoid	10/1151	37/18903	5.16993e-05	0.000462455	0.000297093	CCN2/CYBA/SCNN1A/MAOB/CYBB/EDN1/SGK1/SCNN1G/FOS/FOSB	10
GO:0090505	epiboly involved in wound healing	10/1151	37/18903	5.16993e-05	0.000462455	0.000297093	FLNA/PDPN/FERMT2/ITGA5/AJUBA/COL5A1/ACVRL1/CEACAM1/FERMT1/CCN1	10
GO:0030203	glycosaminoglycan metabolic process	20/1151	123/18903	5.18127e-05	0.000462699	0.00029725	EDNRA/CHST3/FGF2/ITIH5/ANGPT1/EGFLAM/FOXC1/SPOCK3/CHST11/DCN/PDGFRB/CHST15/NDNF/CHST2/TGFB1/UST/EDNRB/B3GNT3/BGN/HPSE2	20
GO:2000351	regulation of endothelial cell apoptotic process	13/1151	60/18903	5.21924e-05	0.000465317	0.000298932	ANGPT1/CD40/ANO6/CD248/GAS6/NDNF/GATA3/KDR/TNFAIP3/RGCC/THBS1/CCL2/SERPINE1	13
GO:0086103	G protein-coupled receptor signaling pathway involved in heart process	7/1151	18/18903	5.34872e-05	0.000476072	0.000305841	EDNRA/ATP2B4/CAV1/PLN/RAMP3/EDN1/CHGA	7
GO:1903510	mucopolysaccharide metabolic process	17/1151	95/18903	5.41289e-05	0.000480987	0.000308998	EDNRA/CHST3/FGF2/ITIH5/ANGPT1/EGFLAM/SPOCK3/CHST11/DCN/CHST15/NDNF/CHST2/TGFB1/UST/EDNRB/B3GNT3/BGN	17
GO:0031348	negative regulation of defense response	34/1151	272/18903	5.43013e-05	0.000481722	0.000309471	NT5E/SERPINF1/PTGIS/FOXF1/ISL1/SYT11/SERPING1/CX3CL1/IFI16/GSTP1/WFDC1/SIRPA/HTRA1/SERPINB9/CD200/FGL2/A2M/GATA3/TNFRSF1B/HLA-E/TNFAIP3/CALCRL/SOCS3/HLA-DRB1/CST7/PTPRC/CEACAM1/CXCL17/HLA-F/HLA-A/ZFP36/SAA1/ACP5/NPY	34
GO:0006970	response to osmotic stress	16/1151	86/18903	5.46189e-05	0.000482946	0.000310257	MYLK/KCNMA1/SLC2A4/ARHGEF2/EFHD1/AKR1B1/AQP1/CASP1/ABCB1/TLR3/ZFP36L1/TRPV4/ITGA2/PYCARD/CLDN1/PTGS2	16
GO:0033077	T cell differentiation in thymus	16/1151	86/18903	5.46189e-05	0.000482946	0.000310257	FZD7/ZEB1/MR1/GLI3/BMP4/ZFP36L1/GATA3/ZFP36L2/BCL2/CD74/IL7R/CD3E/PTPRC/CD3D/IL2RG/EGR3	16
GO:0045927	positive regulation of growth	33/1151	261/18903	5.54216e-05	0.000489239	0.0003143	FGF2/TGFBR3/MMP14/ACACB/CSF1/RND2/SFRP1/TGFBR2/SOX15/EFNA5/NTN1/MEF2C/MAP1B/FGFR2/RFTN1/TEAD1/TGFB2/BCL2/CYBA/SFRP2/HOPX/CXCL12/FN1/HPN/DLL1/CRABP2/CXCR4/IGF2/TFCP2L1/KRT17/EDN1/S100A9/CD38	33
GO:1903707	negative regulation of hemopoiesis	19/1151	114/18903	5.59704e-05	0.000493274	0.000316892	SFRP1/GLI3/INPP5D/SNAI2/BMP4/FBN1/FGL2/TLR3/TMEM176A/TMEM176B/RUNX1/TLR4/CD74/ANXA1/PIK3R1/C1QC/CEACAM1/LTF/ID2	19
GO:0040037	negative regulation of fibroblast growth factor receptor signaling pathway	8/1151	24/18903	5.63606e-05	0.0004959	0.000318579	FGF2/SULF2/NGFR/SPRY2/SPRY1/GATA3/SULF1/THBS1	8
GO:0031349	positive regulation of defense response	37/1151	307/18903	5.71567e-05	0.000502082	0.000322551	EMILIN1/IL33/GPRC5B/CX3CL1/IFI16/STING1/NLRP1/LGALS1/PDE2A/MEF2C/CASP1/TLR3/OPTN/MMRN2/HLA-E/CYBA/C3/TLR4/GPSM3/IL6ST/TRPV4/ETS1/ALOX5AP/ITGA2/CEBPB/CCL5/PLSCR1/PYCARD/PENK/TYROBP/HLA-F/S100A9/COCH/PTGS2/IL6/SERPINE1/PGC	37
GO:0055007	cardiac muscle cell differentiation	20/1151	124/18903	5.83016e-05	0.000510471	0.00032794	FZD7/SLC8A1/ASB2/MYH11/MYOCD/FHL2/ISL1/RARB/SGCB/FHOD3/BMP4/PDGFRB/MEF2C/PDGFRA/TGFB1/ACTC1/DLL1/DKK1/PI16/EDN1	20
GO:0072676	lymphocyte migration	20/1151	124/18903	5.83016e-05	0.000510471	0.00032794	JAM2/MSN/CX3CL1/GAS6/ECM1/CD200/GATA3/IL27RA/S1PR1/CH25H/CXCL12/GPR183/CCL21/AIF1/CCL5/PYCARD/CORO1A/CCL2/CCL19/SAA1	20
GO:0050729	positive regulation of inflammatory response	23/1151	154/18903	5.85619e-05	0.000511917	0.000328869	IL33/GPRC5B/CX3CL1/NLRP1/LGALS1/PDE2A/CASP1/TLR3/HLA-E/C3/TLR4/GPSM3/IL6ST/TRPV4/ETS1/ALOX5AP/ITGA2/CEBPB/PYCARD/S100A9/PTGS2/IL6/SERPINE1	23
GO:0048645	animal organ formation	14/1151	69/18903	5.87503e-05	0.00051273	0.000329391	FGF2/ISL1/TGFBR2/SMARCD3/EYA1/GLI3/BMP4/MEF2C/ROBO1/FGFR2/SPRY1/TP63/SULF1/DKK1	14
GO:0072537	fibroblast activation	6/1151	13/18903	5.95501e-05	0.000516357	0.000331721	ACTA2/DDR2/CYGB/PDGFRB/AKAP12/RGCC	6
GO:0097048	dendritic cell apoptotic process	6/1151	13/18903	5.95501e-05	0.000516357	0.000331721	AXL/GAS6/BCL2/CXCL12/CCL21/CCL19	6
GO:2000668	regulation of dendritic cell apoptotic process	6/1151	13/18903	5.95501e-05	0.000516357	0.000331721	AXL/GAS6/BCL2/CXCL12/CCL21/CCL19	6
GO:2001046	positive regulation of integrin-mediated signaling pathway	6/1151	13/18903	5.95501e-05	0.000516357	0.000331721	FLNA/NID1/LIMS2/LAMA2/LAMB1/LAMB2	6
GO:0071453	cellular response to oxygen levels	25/1151	175/18903	6.04382e-05	0.000523213	0.000336126	CAV1/KCNMB1/SLC8A1/PTGIS/DDR2/LPAR1/SFRP1/SLC2A4/FOXO1/AQP1/EPAS1/AJUBA/NDNF/ZFP36L1/CD34/BCL2/SLC29A1/RGCC/CYBB/EDN1/PTGS2/AQP3/EGR1/KCNK3/FOS	25
GO:0030501	positive regulation of bone mineralization	11/1151	45/18903	6.05856e-05	0.000523647	0.000336404	SLC8A1/ANO6/GPM6B/BMP4/MEF2C/TGFB1/TGFB3/TMEM119/PTN/CCN1/LTF	11
GO:0044706	multi-multicellular organism process	29/1151	218/18903	6.15361e-05	0.000531008	0.000341133	GJA1/SYDE1/FBLN1/ACSL4/MMP2/ITGA5/TGFBR2/COL16A1/CTSB/ITGB4/IGFBP7/PAM/P2RX1/NDP/TIMP1/TGFB3/BCL2/ITGA3/IGFBP5/THBD/ITGA2/PTN/EDN1/PTGS2/SCGB1A1/FOS/JUNB/CD38/FOSB	29
GO:0045807	positive regulation of endocytosis	17/1151	96/18903	6.21015e-05	0.000533904	0.000342994	AXL/CLIP3/ANGPT1/RAB31/CLU/ANO6/ANXA2/C3/GPC3/CD14/CCL21/DLL1/ITGA2/LRP1/CCL19/SELE/SERPINE1	17
GO:0072080	nephron tubule development	17/1151	96/18903	6.21015e-05	0.000533904	0.000342994	FGF2/TCF21/WWTR1/EYA1/GLI3/BMP4/HOXD11/AQP1/DCHS1/MEF2C/ILK/PBX1/GATA3/BCL2/GPC3/DLL1/HEYL	17
GO:0061045	negative regulation of wound healing	15/1151	78/18903	6.22689e-05	0.000533904	0.000342994	FGF2/SERPING1/C1QTNF1/PRKG1/WFDC1/PDGFRA/ANXA2/CD34/PLAU/THBD/CEACAM1/THBS1/SERPINF2/EDN1/SERPINE1	15
GO:0070373	negative regulation of ERK1 and ERK2 cascade	15/1151	78/18903	6.22689e-05	0.000533904	0.000342994	EMILIN1/FBLN1/GSTP1/SPRED1/SIRPA/TIMP3/NDRG2/SPRY2/SPRY1/GBP1/TLR4/DUSP6/PTPRC/ATF3/PSCA	15
GO:0046456	icosanoid biosynthetic process	13/1151	61/18903	6.26717e-05	0.000536502	0.000344663	PTGIS/PTGDS/CASP1/PTGS1/GGT6/GGT5/PLA2G4A/CD74/ANXA1/ALOX5AP/PYCARD/EDN1/PTGS2	13
GO:1990748	cellular detoxification	19/1151	115/18903	6.32842e-05	0.000540884	0.000347478	GSTP1/CYGB/FBLN5/GPX3/GPX8/GSTM2/ABCG2/PTGS1/GSTM3/DUOX1/ALOX5AP/GPX7/GPX2/SOD2/S100A9/SOD3/PTGS2/GSTA1/ALDH1A1	19
GO:0051283	negative regulation of sequestering of calcium ion	20/1151	125/18903	6.55031e-05	0.00055896	0.000359091	FGF2/FLNA/SLC8A1/ANXA6/JPH2/PLN/CX3CL1/ATP1A2/JPH4/RASA3/DMD/GSTM2/CYBA/CASQ2/CCL21/PTPRC/CORO1A/CASQ1/ITPR1/CCL19	20
GO:0098868	bone growth	9/1151	31/18903	6.62929e-05	0.000564501	0.00036265	ANXA6/DDR2/RARB/LEPR/TGFBR2/RARG/ECM1/FGFR2/COL27A1	9
GO:0090504	epiboly	10/1151	38/18903	6.63624e-05	0.000564501	0.00036265	FLNA/PDPN/FERMT2/ITGA5/AJUBA/COL5A1/ACVRL1/CEACAM1/FERMT1/CCN1	10
GO:0002703	regulation of leukocyte mediated immunity	31/1151	241/18903	6.65288e-05	0.000565021	0.000362985	FOXF1/CD40/MR1/SERPINB9/TLR3/TGFB1/GATA3/TNFRSF1B/KIT/IL27RA/HLA-E/C3/TLR4/AHR/ARID5A/HLA-DRA/KLRB1/IL7R/ITGB2/HLA-DRB1/RAC2/CXCL6/BST2/PTPRC/CEACAM1/TYROBP/HLA-F/HLA-A/IL6/CD177/AZGP1	31
GO:0043627	response to estrogen	14/1151	70/18903	6.9374e-05	0.000588257	0.000377912	CAV1/MMP14/MMP2/SFRP1/TGFBR2/GLI3/PDGFRB/SERPINB9/GATA3/TGFB3/GSTM3/ARID5A/KRT19/MME	14
GO:0071383	cellular response to steroid hormone stimulus	28/1151	209/18903	7.21766e-05	0.000611057	0.000392559	KANK2/SERPINF1/ISL1/TCF21/ATP1A2/SFRP1/FAM107A/BMP4/AQP1/PAQR8/TP63/ZFP36L1/FBXO32/ZFP36L2/NR3C1/SCNN1A/ANXA1/HEYL/EDN1/PER1/SCGB2A1/DDIT4/SGK1/SCNN1G/ZFP36/NR4A3/CYP1B1/OR51E2	28
GO:0002720	positive regulation of cytokine production involved in immune response	15/1151	79/18903	7.25949e-05	0.000611709	0.000392978	GPRC5B/TLR3/GATA3/KIT/HLA-E/TLR4/CD74/ARID5A/LAPTM5/PYCARD/HLA-F/HLA-A/IL6/NR4A3/SPON2	15
GO:0048844	artery morphogenesis	15/1151	79/18903	7.25949e-05	0.000611709	0.000392978	EDNRA/MYLK/EFEMP2/PRRX1/FOXF1/MYOCD/FOXC1/EYA1/BMP4/PDGFRB/ACVRL1/TGFB2/COL3A1/LRP1/EDN1	15
GO:1903556	negative regulation of tumor necrosis factor superfamily cytokine production	15/1151	79/18903	7.25949e-05	0.000611709	0.000392978	AXL/SYT11/VSIR/CX3CL1/GAS6/GSTP1/SIRPA/IL27RA/CD34/TLR4/TNFAIP3/LTF/GPNMB/ACP5/ORM1	15
GO:0022617	extracellular matrix disassembly	13/1151	62/18903	7.49295e-05	0.000629408	0.000404348	PDPN/DDR2/MMP14/SH3PXD2B/MMP2/CTSK/TGFB1/CTSS/HPN/LRP1/TPSAB1/MMP7/IL6	13
GO:0032233	positive regulation of actin filament bundle assembly	13/1151	62/18903	7.49295e-05	0.000629408	0.000404348	FERMT2/SYNPO2/LPAR1/SYNPO/TPM1/CX3CL1/SFRP1/CCN2/TGFB3/ID1/RGCC/MYOC/SERPINF2	13
GO:0060443	mammary gland morphogenesis	11/1151	46/18903	7.52851e-05	0.000631408	0.000405633	CAV1/CSF1/TGFBR2/NTN1/GLI3/BMP4/FGFR2/CSF1R/EPHA2/NR3C1/IGFBP5	11
GO:0034599	cellular response to oxidative stress	35/1151	288/18903	7.57871e-05	0.000634629	0.000407702	EDNRA/AXL/DDR2/TPM1/MMP2/MET/PDGFD/FBLN5/FOXO1/SIRPA/AQP1/PDGFRA/EPAS1/GPX8/BCL2/PAGE4/RHOB/TLR4/ANXA1/GPX7/AIF1/TNFAIP3/ETV5/KLF2/NCOA7/CAMKK2/PENK/SOD2/EDN1/SOD3/HSPB1/IL6/FOS/NR4A3/CYP1B1	35
GO:0030857	negative regulation of epithelial cell differentiation	12/1151	54/18903	7.7507e-05	0.000647015	0.00041566	CAV1/ZEB1/FST/SPRED1/SPRY2/SPRY1/ACVRL1/TP63/S1PR3/ID1/DLL1/FRZB	12
GO:0045778	positive regulation of ossification	12/1151	54/18903	7.7507e-05	0.000647015	0.00041566	SLC8A1/ANO6/GPM6B/BMP4/MEF2C/TGFB1/TGFB3/TGFB2/TMEM119/PTN/CCN1/LTF	12
GO:0003148	outflow tract septum morphogenesis	8/1151	25/18903	7.84775e-05	0.000653088	0.000419561	ISL1/TGFBR2/NRP2/BMP4/ROBO1/FGFR2/TGFB2/SEMA3C	8
GO:0045649	regulation of macrophage differentiation	8/1151	25/18903	7.84775e-05	0.000653088	0.000419561	ROR2/CSF1/IL34/TGFB1/PRKCA/HCLS1/C1QC/ID2	8
GO:0030098	lymphocyte differentiation	46/1151	419/18903	7.88822e-05	0.000655442	0.000421073	AXL/FZD7/MMP14/VSIR/ZEB1/GAS6/LEPR/MR1/SFRP1/TGFBR2/SMARCD3/GLI3/INPP5D/LGALS1/BMP4/FGL2/HLA-DOA/PBX1/ZFP36L1/GATA3/KIT/ZFP36L2/BCL2/RUNX1/CD74/ANXA1/PIK3R1/VCAM1/GPR183/HLA-DRA/DLL1/IL7R/CD3E/CD4/HLA-DRB1/PTPRC/CD2/ITM2A/CD3D/IL2RG/CCL19/ID2/EGR1/IL6/EGR3/JUNB	46
GO:0032642	regulation of chemokine production	17/1151	98/18903	8.12087e-05	0.000673732	0.000432823	IL33/GSTP1/SNAI2/SIRPA/CSF1R/TLR3/EPHA2/TLR4/CD74/TRPV4/ACKR1/AIF1/CXCL6/PYCARD/EGR1/IL6/ALOX15B	17
GO:0051282	regulation of sequestering of calcium ion	20/1151	127/18903	8.2316e-05	0.000681866	0.000438048	FGF2/FLNA/SLC8A1/ANXA6/JPH2/PLN/CX3CL1/ATP1A2/JPH4/RASA3/DMD/GSTM2/CYBA/CASQ2/CCL21/PTPRC/CORO1A/CASQ1/ITPR1/CCL19	20
GO:0043123	positive regulation of I-kappaB kinase/NF-kappaB signaling	26/1151	189/18903	8.27755e-05	0.000684617	0.000439816	GJA1/FLNA/LPAR1/GPRC5B/CD40/CX3CL1/PRKCB/LGALS1/CASP1/ECM1/AJUBA/TRIM22/TLR3/S100A4/TLR4/CD74/S100B/CCL21/CD4/HLA-DRB1/BIRC3/BST2/SECTM1/LTF/CCL19/UBD	26
GO:0048644	muscle organ morphogenesis	15/1151	80/18903	8.43876e-05	0.000695804	0.000447003	EDNRA/MYLK/EFEMP2/TGFBR3/ISL1/FOXC1/TPM1/FGFR2/TGFB1/S1PR1/ACTC1/TGFB2/COL3A1/HEG1/TNNC1	15
GO:0032570	response to progesterone	10/1151	39/18903	8.44141e-05	0.000695804	0.000447003	CAV1/PTGER2/TGFB1/TGFB3/TGFB2/THBS1/FOS/CYP1B1/CD38/FOSB	10
GO:0008154	actin polymerization or depolymerization	27/1151	200/18903	8.45163e-05	0.000695804	0.000447003	LMOD1/KIRREL1/GSN/CDC42EP3/SVIL/DAAM2/CFL2/GAS7/WIPF1/FHOD3/FAM107A/FCHSD2/MYADM/CDC42EP4/TMOD1/ELN/CAPG/KANK1/HCLS1/CXCL12/CCL21/AIF1/PYCARD/CORO1A/TMSB15A/ANG/CDC42EP5	27
GO:0003002	regionalization	41/1151	360/18903	8.48963e-05	0.000697863	0.000448326	FGF2/FOXF1/ISL1/FOXC1/HOXD13/GPR161/SFRP1/ALDH1A2/RARG/SMARCD3/GLI3/NRP2/BMP4/ETS2/HHIP/HOXD10/HOXD11/MEF2C/ROBO1/FGFR2/SPRY1/ACVRL1/TP63/PBX1/SFRP2/HOXB2/C3/GPC3/DLL1/HEYL/C1QA/HOXD9/DKK1/BTG2/NBL1/EDN1/SEMA3C/SP8/EGR2/BHLHE40/DLX1	41
GO:0032231	regulation of actin filament bundle assembly	18/1151	108/18903	8.70306e-05	0.000712026	0.000457424	FLNA/FERMT2/SYNPO2/LPAR1/SYNPO/TPM1/CX3CL1/SFRP1/MET/CCN2/S1PR1/TGFB3/ID1/PIK3R1/RGCC/MYOC/RHPN1/SERPINF2	18
GO:0090263	positive regulation of canonical Wnt signaling pathway	18/1151	108/18903	8.70306e-05	0.000712026	0.000457424	FGF2/CAV1/ADGRA2/DAAM2/GPRC5B/DACT1/SFRP1/RSPO3/FGFR2/ILK/TGFB1/KANK1/SFRP2/LGR6/PLEKHA4/CDH3/GPC3/COL1A1	18
GO:1902106	negative regulation of leukocyte differentiation	18/1151	108/18903	8.70306e-05	0.000712026	0.000457424	SFRP1/GLI3/INPP5D/BMP4/FBN1/FGL2/TLR3/TMEM176A/TMEM176B/RUNX1/TLR4/CD74/ANXA1/PIK3R1/C1QC/CEACAM1/LTF/ID2	18
GO:0043552	positive regulation of phosphatidylinositol 3-kinase activity	9/1151	32/18903	8.72814e-05	0.000712026	0.000457424	FGF2/TNFAIP8L3/PDGFRB/PDGFRA/TGFB1/KIT/CCL21/IRS1/CCL19	9
GO:0061037	negative regulation of cartilage development	9/1151	32/18903	8.72814e-05	0.000712026	0.000457424	EFEMP1/RARB/RARG/GLI3/SNAI2/BMP4/CTSK/LTBP3/FRZB	9
GO:0030514	negative regulation of BMP signaling pathway	13/1151	63/18903	8.92111e-05	0.000723377	0.000464716	CHRDL1/SFRP1/FBN1/HTRA1/RBPMS2/SPART/CHRDL2/SFRP2/CRIM1/HTRA3/DKK1/NBL1/DLX1	13
GO:0032623	interleukin-2 production	13/1151	63/18903	8.92111e-05	0.000723377	0.000464716	PRNP/GBP1/GATA3/CD34/RUNX1/ANXA1/VTCN1/TNFAIP3/CD3E/LAPTM5/CD4/PTPRC/ZFP36	13
GO:0032663	regulation of interleukin-2 production	13/1151	63/18903	8.92111e-05	0.000723377	0.000464716	PRNP/GBP1/GATA3/CD34/RUNX1/ANXA1/VTCN1/TNFAIP3/CD3E/LAPTM5/CD4/PTPRC/ZFP36	13
GO:0032731	positive regulation of interleukin-1 beta production	13/1151	63/18903	8.92111e-05	0.000723377	0.000464716	ISL1/IFI16/NLRP1/CASP1/TLR4/PYCARD/TYROBP/CCL19/HSPB1/EGR1/IL6/ORM2/ORM1	13
GO:0051962	positive regulation of nervous system development	34/1151	279/18903	9.03243e-05	0.000731035	0.000469636	FGF2/SERPINF1/IL33/CX3CL1/RND2/NLGN3/EFNA5/SMARCD3/NTN1/GLI3/MAP1B/IL34/ROBO1/ID4/PLXND1/TGFB1/TNFRSF1B/KIT/FLRT3/DIXDC1/SLITRK6/IL6ST/CXCL12/FN1/CRABP2/CXCR4/PTN/AMIGO2/ID2/THBS2/IL6/EGR2/TGM2/MME	34
GO:0030326	embryonic limb morphogenesis	19/1151	118/18903	9.05634e-05	0.000731035	0.000469636	PRRX1/HOXD13/RARB/ALDH1A2/MAP3K20/RARG/GLI3/CHST11/BMP4/HOXD10/TP63/PBX1/TGFB2/SFRP2/GPC3/CRABP2/HOXD9/DKK1/SP8	19
GO:0035113	embryonic appendage morphogenesis	19/1151	118/18903	9.05634e-05	0.000731035	0.000469636	PRRX1/HOXD13/RARB/ALDH1A2/MAP3K20/RARG/GLI3/CHST11/BMP4/HOXD10/TP63/PBX1/TGFB2/SFRP2/GPC3/CRABP2/HOXD9/DKK1/SP8	19
GO:0007163	establishment or maintenance of cell polarity	30/1151	234/18903	9.20423e-05	0.00074102	0.000476051	GJA1/FOXF1/GSN/RND3/MSN/RND2/FEZ1/RHOJ/DST/CLIC4/PDLIM1/CAP2/AQP1/MAP1B/JAM3/SPRY2/SPRY1/ILK/GATA3/UST/AMOTL2/KANK1/RHOB/CCL21/RAC2/AMOT/FERMT1/RAC3/CCL19/MISP	30
GO:0048706	embryonic skeletal system development	20/1151	128/18903	9.20761e-05	0.00074102	0.000476051	EDNRA/PRRX1/MMP14/ZEB1/SULF2/TGFBR2/EYA1/GLI3/CHST11/BMP4/HOXD10/PDGFRA/FGFR2/PBX1/TGFB3/SULF1/HOXB2/HOXD9/COL1A1/DLX1	20
GO:0032602	chemokine production	17/1151	99/18903	9.25706e-05	0.000743886	0.000477892	IL33/GSTP1/SNAI2/SIRPA/CSF1R/TLR3/EPHA2/TLR4/CD74/TRPV4/ACKR1/AIF1/CXCL6/PYCARD/EGR1/IL6/ALOX15B	17
GO:0048286	lung alveolus development	11/1151	47/18903	9.29323e-05	0.000744566	0.000478329	FOXF1/MYOCD/TCF21/BMP4/FGFR2/ITGB6/LTBP3/TGFB3/KDR/IGFBP5/HOPX	11
GO:0071470	cellular response to osmotic stress	11/1151	47/18903	9.29323e-05	0.000744566	0.000478329	MYLK/SLC2A4/ARHGEF2/EFHD1/AKR1B1/AQP1/CASP1/ZFP36L1/TRPV4/PYCARD/PTGS2	11
GO:0051924	regulation of calcium ion transport	33/1151	268/18903	9.32061e-05	0.000745191	0.000478731	CAV1/MYLK/SLC8A1/PRNP/JPH2/RGN/PLN/CX3CL1/ATP1A2/JPH4/PDGFRB/DMD/STAC/GEM/P2RX1/GSTM2/LGALS3/BCL2/CYBA/STAC2/CASQ2/ATP1B1/CXCL12/CXCR4/CCL5/CD4/RAMP3/AHNAK/RRAD/CORO1A/CCL2/CASQ1/PTGS2	33
GO:0022898	regulation of transmembrane transporter activity	35/1151	291/18903	9.34461e-05	0.000745191	0.000478731	EDNRA/STOM/CAV1/PRNP/JPH2/RGN/PLN/FHL1/ABCC9/NLGN3/ATP1A2/JPH4/FXYD6/ATP1B2/MEF2C/ABCB1/KCNAB1/DMD/STAC/GEM/GSTM2/BCL2/STAC2/CASQ2/FXYD5/ATP1B1/CTSS/CFTR/AHNAK/RRAD/CCL2/EDN1/CASQ1/KCNK3/CACNG4	35
GO:0046394	carboxylic acid biosynthetic process	38/1151	326/18903	9.35218e-05	0.000745191	0.000478731	BHMT2/ATP2B4/PTGIS/RGN/GATM/HAAO/ACACB/CES1/GSTP1/ALDH1A2/GSTM4/PTGDS/CASP1/CYP27A1/RBP1/GSTM2/DPYD/PTGS1/GGT6/GGT5/PDK4/PLA2G4A/CD74/ANXA1/ALOX5AP/CRABP2/PYCARD/MGLL/SCD5/CEACAM1/EDN1/OAT/PTGS2/FASN/ALDH1A1/AMACR/ACSM1/ALOX15B	38
GO:0003229	ventricular cardiac muscle tissue development	12/1151	55/18903	9.37034e-05	0.000745191	0.000478731	EDNRA/TGFBR3/ISL1/FOXC1/TPM1/FGFR2/TGFB1/TGFB2/HEG1/HOPX/ID2/TNNC1	12
GO:0010518	positive regulation of phospholipase activity	12/1151	55/18903	9.37034e-05	0.000745191	0.000478731	EDNRA/FGF2/LPAR1/FGFR1/PDGFRB/PDGFRA/FGFR2/KIT/CCL5/CCN1/SELE/ANG	12
GO:0035567	non-canonical Wnt signaling pathway	14/1151	72/18903	9.57337e-05	0.000759092	0.000487661	PRICKLE2/FZD7/DAAM2/ROR2/DACT1/SFRP1/RSPO3/SFRP2/PLEKHA4/GPC3/FRZB/DKK1/VANGL2/MYOC	14
GO:1903317	regulation of protein maturation	14/1151	72/18903	9.57337e-05	0.000759092	0.000487661	SPON1/PRNP/MMP14/GSN/GAS1/ANXA2/RUNX1/PLAU/HPN/CLEC3B/CST7/THBS1/SERPINF2/SERPINE1	14
GO:0051591	response to cAMP	16/1151	90/18903	9.64446e-05	0.000763602	0.000490558	SLC8A1/PDE2A/AQP1/ZFP36L1/DUOX1/AHR/IGFBP5/THBD/CFTR/PENK/COL1A1/SDC1/PER1/FOS/CYP1B1/FOSB	16
GO:2000377	regulation of reactive oxygen species metabolic process	22/1151	149/18903	9.99751e-05	0.000790391	0.000507768	GSTP1/TGFBR2/CRYAB/FBLN5/PDGFRB/FOXO1/TGFB1/BCL2/CYBA/PAGE4/TLR4/DUOXA1/GADD45A/PID1/ITGB2/RAC2/THBS1/TYROBP/SOD2/CD177/ACP5/CYP1B1	22
GO:0022408	negative regulation of cell-cell adhesion	27/1151	202/18903	0.000100266	0.000791526	0.000508497	PRNP/PDE5A/VSIR/C1QTNF1/PRKG1/GLI3/BMP4/MYADM/FGL2/TGFB1/LGALS3/RUNX1/CD74/FXYD5/TRPV4/ANXA1/CXCL12/VTCN1/CCL21/LRRC32/CEBPB/RGCC/LAPTM5/HLA-DRB1/CEACAM1/GPNMB/SCGB1A1	27
GO:0030041	actin filament polymerization	24/1151	170/18903	0.000101674	0.000801462	0.000514881	LMOD1/KIRREL1/GSN/CDC42EP3/SVIL/DAAM2/GAS7/FHOD3/FAM107A/FCHSD2/MYADM/CDC42EP4/TMOD1/ELN/CAPG/KANK1/HCLS1/CCL21/AIF1/PYCARD/CORO1A/TMSB15A/ANG/CDC42EP5	24
GO:0032412	regulation of ion transmembrane transporter activity	34/1151	281/18903	0.000103993	0.000818544	0.000525854	EDNRA/STOM/CAV1/PRNP/JPH2/RGN/PLN/FHL1/ABCC9/NLGN3/ATP1A2/JPH4/FXYD6/ATP1B2/MEF2C/ABCB1/KCNAB1/DMD/STAC/GEM/GSTM2/STAC2/CASQ2/FXYD5/ATP1B1/CTSS/CFTR/AHNAK/RRAD/CCL2/EDN1/CASQ1/KCNK3/CACNG4	34
GO:0048709	oligodendrocyte differentiation	17/1151	100/18903	0.000105305	0.000826741	0.00053112	TSPAN2/TRPC4/LPAR1/IL33/DAAM2/CNTN1/CLU/GLI3/CNTNAP1/IL34/ID4/PRDM8/TNFRSF1B/MAL/CXCR4/PTN/DLX1	17
GO:0043409	negative regulation of MAPK cascade	25/1151	181/18903	0.000105342	0.000826741	0.00053112	CAV1/EMILIN1/FBLN1/DACT1/GSTP1/SFRP1/SPRED1/BMP4/FOXO1/SIRPA/TIMP3/NDRG2/SPRY2/SPRY1/GBP1/SFRP2/TLR4/DUSP5/DUSP6/PTPRC/DUSP1/PER1/DUSP2/ATF3/PSCA	25
GO:0016053	organic acid biosynthetic process	38/1151	328/18903	0.000106388	0.000833098	0.000535204	BHMT2/ATP2B4/PTGIS/RGN/GATM/HAAO/ACACB/CES1/GSTP1/ALDH1A2/GSTM4/PTGDS/CASP1/CYP27A1/RBP1/GSTM2/DPYD/PTGS1/GGT6/GGT5/PDK4/PLA2G4A/CD74/ANXA1/ALOX5AP/CRABP2/PYCARD/MGLL/SCD5/CEACAM1/EDN1/OAT/PTGS2/FASN/ALDH1A1/AMACR/ACSM1/ALOX15B	38
GO:0010762	regulation of fibroblast migration	10/1151	40/18903	0.000106462	0.000833098	0.000535204	FGF2/SLC8A1/ACTA2/DDR2/CORO1C/CYGB/AQP1/TGFB1/AKAP12/THBS1	10
GO:0030318	melanocyte differentiation	8/1151	26/18903	0.000107336	0.000837498	0.000538031	MITF/GLI3/MEF2C/KIT/BCL2/EDNRB/EDN3/OR51E2	8
GO:2000050	regulation of non-canonical Wnt signaling pathway	8/1151	26/18903	0.000107336	0.000837498	0.000538031	DAAM2/DACT1/SFRP1/RSPO3/SFRP2/PLEKHA4/GPC3/DKK1	8
GO:1901216	positive regulation of neuron death	16/1151	91/18903	0.000110507	0.00085886	0.000551754	PRNP/DDR2/GRIK5/ITGA1/CLU/NFATC4/TGFB2/TLR4/NR3C1/C1QA/ITGB2/DKK1/TYROBP/DDIT4/EGR1/FOS	16
GO:0034614	cellular response to reactive oxygen species	22/1151	150/18903	0.000110553	0.00085886	0.000551754	AXL/DDR2/TPM1/MMP2/MET/PDGFD/FBLN5/SIRPA/AQP1/PDGFRA/RHOB/ANXA1/TNFAIP3/KLF2/CAMKK2/SOD2/EDN1/SOD3/IL6/FOS/NR4A3/CYP1B1	22
GO:0043535	regulation of blood vessel endothelial cell migration	22/1151	150/18903	0.000110553	0.00085886	0.000551754	ATP2B4/FGF2/ANGPT1/FGFR1/CD40/RHOJ/SPRED1/MEF2C/ACVRL1/TGFB1/MMRN2/EPHA2/KDR/ETS1/ANXA1/PRKCA/GADD45A/RGCC/JCAD/THBS1/PTGS2/HSPB1	22
GO:1904035	regulation of epithelial cell apoptotic process	18/1151	110/18903	0.000111082	0.00086173	0.000553598	ANGPT1/GSN/CD40/ANO6/CD248/GAS6/NDNF/ZFP36L1/GATA3/BCL2/KDR/TNFAIP3/RGCC/THBS1/CCL2/IL6/ZFP36/SERPINE1	18
GO:0051149	positive regulation of muscle cell differentiation	15/1151	82/18903	0.000113077	0.00087594	0.000562727	EFEMP2/MYOCD/MMP14/NID1/BMP4/MEF2C/LAMA2/TGFB1/KIT/BCL2/HOPX/LAMB1/LAMB2/SOD2/EDN1	15
GO:0060048	cardiac muscle contraction	21/1151	140/18903	0.000113404	0.000876179	0.00056288	GJA1/CAV1/FLNA/KCNJ8/SLC8A1/GSN/PDE5A/TPM1/PLN/ABCC9/GJC1/ATP1A2/KCNH2/DMD/GSTM2/CCN2/CASQ2/ATP1B1/CXCR4/TNNC1/CHGA	21
GO:0001974	blood vessel remodeling	11/1151	48/18903	0.000113994	0.000876179	0.00056288	EDNRA/AXL/FLNA/FOXC1/RSPO3/MEF2C/EPAS1/ACVRL1/TGFB1/CEACAM1/SEMA3C	11
GO:0006953	acute-phase response	11/1151	48/18903	0.000113994	0.000876179	0.00056288	A2M/EDNRB/FN1/CEBPB/PLSCR1/SERPINF2/PTGS2/IL6/SAA1/ORM2/ORM1	11
GO:0048483	autonomic nervous system development	11/1151	48/18903	0.000113994	0.000876179	0.00056288	EDNRA/NAV2/NRP2/TP63/GATA3/HOXB2/EDNRB/FN1/VCAM1/ACKR3/EGR2	11
GO:0061028	establishment of endothelial barrier	11/1151	48/18903	0.000113994	0.000876179	0.00056288	EDNRA/VCL/MSN/PDE2A/MYADM/S1PR3/PECAM1/EDNRB/CLDN5/CLDN1/FASN	11
GO:0002821	positive regulation of adaptive immune response	19/1151	120/18903	0.000114086	0.000876179	0.00056288	CD40/MR1/TGFB1/GATA3/IL27RA/HLA-E/C3/PLA2G4A/IL6ST/ARID5A/HLA-DRA/CD4/HLA-DRB1/PYCARD/PTPRC/HLA-F/HLA-A/IL6/AZGP1	19
GO:0002577	regulation of antigen processing and presentation	7/1151	20/18903	0.000116985	0.00089207	0.000573089	FGL2/HLA-DOA/CD74/CCL21/PYCARD/THBS1/CCL19	7
GO:0035455	response to interferon-alpha	7/1151	20/18903	0.000116985	0.00089207	0.000573089	AXL/GAS6/GATA3/IFITM3/IFITM2/IFITM1/BST2	7
GO:0045655	regulation of monocyte differentiation	7/1151	20/18903	0.000116985	0.00089207	0.000573089	CSF1/INPP5D/IL34/ZFP36L1/CD74/CD4/HLA-DRB1	7
GO:0055093	response to hyperoxia	7/1151	20/18903	0.000116985	0.00089207	0.000573089	CAV1/PDPN/MMP2/PDGFRB/FOXO1/COL1A1/SOD2	7
GO:1903975	regulation of glial cell migration	7/1151	20/18903	0.000116985	0.00089207	0.000573089	BMERB1/CX3CL1/CSF1/ATP1B2/NTN1/RRAS/GPR183	7
GO:0016064	immunoglobulin mediated immune response	28/1151	215/18903	0.000118633	0.000903358	0.000580341	SERPING1/C1S/CD40/CLU/C1R/C7/INPP5D/CFI/HLA-DOA/TGFB1/IL27RA/HLA-E/C3/HLA-DPB1/HLA-DPA1/CD74/HLA-DRA/C1QA/C1QC/HLA-DRB1/C1QB/HLA-DQA1/PTPRC/HLA-DQB2/HLA-DRB5/HLA-DQB1/HLA-DQA2/IGLL5	28
GO:0071456	cellular response to hypoxia	22/1151	151/18903	0.000122112	0.000928533	0.000596514	KCNMB1/SLC8A1/PTGIS/DDR2/SFRP1/SLC2A4/AQP1/EPAS1/AJUBA/NDNF/ZFP36L1/CD34/BCL2/SLC29A1/RGCC/CYBB/EDN1/PTGS2/AQP3/EGR1/KCNK3/FOS	22
GO:0006940	regulation of smooth muscle contraction	13/1151	65/18903	0.000124957	0.000948824	0.000609549	CAV1/MYOCD/KCNMA1/PRKG1/CNN1/ATP1A2/P2RX1/KIT/ITGA2/CALCRL/ADRA2C/EDN1/PTGS2	13
GO:0044000	movement in host	25/1151	183/18903	0.000125879	0.000954477	0.000613181	CAV2/CAV1/AXL/GSN/GAS6/ITGA5/CTSB/LGALS1/NCAM1/TRIM22/EPHA2/ITGB6/CD74/CH25H/IFITM3/IFITM2/ITGA2/CXCR4/SELPLG/CD4/HLA-DRB1/PLSCR1/IFITM1/CLDN1/ANPEP	25
GO:0090100	positive regulation of transmembrane receptor protein serine/threonine kinase signaling pathway	19/1151	121/18903	0.00012775	0.000966187	0.000620704	RBPMS/TGFBR3/TGFB1I1/MYOCD/ZNF423/TGFBR2/BMP4/ACVRL1/ILK/ITGA8/TGFB1/TGFB3/SULF1/TGFB2/KDR/GPC3/THBS1/FERMT1/CCN1	19
GO:0051208	sequestering of calcium ion	20/1151	131/18903	0.000127783	0.000966187	0.000620704	FGF2/FLNA/SLC8A1/ANXA6/JPH2/PLN/CX3CL1/ATP1A2/JPH4/RASA3/DMD/GSTM2/CYBA/CASQ2/CCL21/PTPRC/CORO1A/CASQ1/ITPR1/CCL19	20
GO:0002699	positive regulation of immune effector process	32/1151	261/18903	0.000128197	0.000967961	0.000621844	FOXF1/IL33/GPRC5B/CD40/MR1/TLR3/TGFB1/GATA3/KIT/HLA-E/C3/TLR4/CD74/ANXA1/ARID5A/HLA-DRA/LAPTM5/ITGB2/HLA-DRB1/RAC2/PYCARD/PTPRC/TYROBP/HLA-F/CCL19/HLA-A/IL6/CD177/NR4A3/AZGP1/SPON2/PGC	32
GO:0014032	neural crest cell development	15/1151	83/18903	0.000130366	0.000980359	0.000629808	EDNRA/ANXA6/ISL1/FOXC1/EFNB1/CORO1C/ALDH1A2/NRP2/SNAI2/BMP4/EDNRB/EDN3/FN1/EDN1/SEMA3C	15
GO:0002381	immunoglobulin production involved in immunoglobulin-mediated immune response	14/1151	74/18903	0.000130386	0.000980359	0.000629808	CD40/HLA-DOA/TGFB1/IL27RA/HLA-DPB1/HLA-DPA1/HLA-DRA/HLA-DRB1/HLA-DQA1/PTPRC/HLA-DQB2/HLA-DRB5/HLA-DQB1/HLA-DQA2	14
GO:0032732	positive regulation of interleukin-1 production	14/1151	74/18903	0.000130386	0.000980359	0.000629808	ISL1/IFI16/NLRP1/CASP1/TLR4/PYCARD/TYROBP/CCL19/HSPB1/EGR1/IL6/SAA1/ORM2/ORM1	14
GO:0030217	T cell differentiation	35/1151	296/18903	0.00013127	0.000985625	0.000633191	FZD7/VSIR/ZEB1/LEPR/MR1/TGFBR2/SMARCD3/GLI3/BMP4/FGL2/HLA-DOA/ZFP36L1/GATA3/KIT/ZFP36L2/BCL2/RUNX1/CD74/ANXA1/PIK3R1/GPR183/HLA-DRA/IL7R/CD3E/CD4/HLA-DRB1/PTPRC/CD2/CD3D/IL2RG/CCL19/EGR1/IL6/EGR3/JUNB	35
GO:0001914	regulation of T cell mediated cytotoxicity	10/1151	41/18903	0.00013319	0.000995865	0.00063977	MR1/HLA-E/HLA-DRA/IL7R/HLA-DRB1/PTPRC/CEACAM1/HLA-F/HLA-A/AZGP1	10
GO:0045124	regulation of bone resorption	10/1151	41/18903	0.00013319	0.000995865	0.00063977	INPP5D/CSF1R/S1PR1/LTBP3/TMEM119/PDK4/PRKCA/TNFAIP3/IL6/CD38	10
GO:1905314	semi-lunar valve development	10/1151	41/18903	0.00013319	0.000995865	0.00063977	EMILIN1/SNAI2/BMP4/ROBO1/TGFB1/GATA3/TNFRSF1B/ELN/TGFB2/HEYL	10
GO:0051403	stress-activated MAPK cascade	30/1151	239/18903	0.000135114	0.00100885	0.000648112	FZD7/DACT1/GSTP1/SFRP1/MAP3K20/CRYAB/BMP4/FOXO1/SIRPA/MDFIC/TLR3/ZFP36L1/CCN2/TGFB2/DIXDC1/PAGE4/SFRP2/IGFBP6/TLR4/TRPV4/GADD45A/CCL21/PYCARD/SERPINF2/DUSP1/PER1/CCL19/CDC42EP5/GADD45B/ZFP36	30
GO:0008630	intrinsic apoptotic signaling pathway in response to DNA damage	17/1151	102/18903	0.000135458	0.00101002	0.000648864	CLU/IFI16/NFATC4/SNAI2/TP63/TNFRSF1B/EPHA2/BCL2/SFRP2/CD74/PIK3R1/CXCL12/PHLDA3/ACKR3/PYCARD/SOD2/DDIT4	17
GO:0003044	regulation of systemic arterial blood pressure mediated by a chemical signal	11/1151	49/18903	0.000138989	0.00103348	0.000663934	TPM1/CYBA/ADRA1D/EDNRB/EDN3/SLC2A5/CPA3/SERPINF2/SOD2/EDN1/OR51E2	11
GO:0048066	developmental pigmentation	11/1151	49/18903	0.000138989	0.00103348	0.000663934	EDNRA/MITF/RAB38/GLI3/MEF2C/KIT/BCL2/EDNRB/EDN3/SOD2/OR51E2	11
GO:0002263	cell activation involved in immune response	35/1151	297/18903	0.000140313	0.00104188	0.000669334	FOXF1/IL33/CD40/LGALS1/PTGDS/DYSF/FGL2/TGFB1/GATA3/KIT/LGALS3/IL27RA/TLR4/CD74/ANXA1/GPR183/HLA-DRA/DLL1/LRP1/ITGB2/HLA-DRB1/RAC2/PYCARD/PTPRC/CEACAM1/CORO1A/TYROBP/ITM2A/HLA-F/CCL19/IL6/CD177/NR4A3/JUNB/CHGA	35
GO:0014829	vascular associated smooth muscle contraction	8/1151	27/18903	0.000144434	0.00106659	0.000685207	EDNRA/SLC8A1/ACTA2/P2RX1/EDNRB/EDN3/EDN1/CD38	8
GO:0031639	plasminogen activation	8/1151	27/18903	0.000144434	0.00106659	0.000685207	ANXA2/RUNX1/PLAU/HPN/CLEC3B/THBS1/SERPINF2/SERPINE1	8
GO:0042537	benzene-containing compound metabolic process	8/1151	27/18903	0.000144434	0.00106659	0.000685207	HAAO/SRD5A2/GSTM4/CYP4B1/GSTM2/GSTM3/CYP1B1/ACSM1	8
GO:0071280	cellular response to copper ion	8/1151	27/18903	0.000144434	0.00106659	0.000685207	PRNP/AQP1/MT1A/MT1X/AOC1/MT1M/MT1E/MT1G	8
GO:0002440	production of molecular mediator of immune response	38/1151	333/18903	0.000145838	0.00107503	0.000690626	AXL/ANGPT1/IL33/GPRC5B/CD40/TLR3/HLA-DOA/TGFB1/GATA3/TNFRSF1B/KIT/IL27RA/HLA-E/TGFB3/TGFB2/HLA-DPB1/TLR4/HLA-DPA1/CD74/ARID5A/HLA-DRA/LAPTM5/HLA-DRB1/PYCARD/BST2/HLA-DQA1/PTPRC/HLA-F/HLA-DQB2/HLA-DRB5/HLA-DQB1/HLA-A/IL6/HLA-DQA2/NR4A3/ACP5/SPON2/PGC	38
GO:0009954	proximal/distal pattern formation	9/1151	34/18903	0.000146177	0.00107503	0.000690626	ALDH1A2/GLI3/HOXD10/TP63/PBX1/DLL1/HOXD9/SP8/DLX1	9
GO:0061081	positive regulation of myeloid leukocyte cytokine production involved in immune response	9/1151	34/18903	0.000146177	0.00107503	0.000690626	GPRC5B/TLR3/KIT/TLR4/CD74/LAPTM5/PYCARD/NR4A3/SPON2	9
GO:0072577	endothelial cell apoptotic process	13/1151	66/18903	0.000147046	0.00107994	0.000693784	ANGPT1/CD40/ANO6/CD248/GAS6/NDNF/GATA3/KDR/TNFAIP3/RGCC/THBS1/CCL2/SERPINE1	13
GO:0071902	positive regulation of protein serine/threonine kinase activity	29/1151	229/18903	0.000148593	0.00108982	0.000700126	ATP2B4/FGF2/FERMT2/PDGFC/FGFR1/PDE5A/ROR2/CD40/CCND2/PDGFD/PDGFRB/MEF2C/IL34/ROBO1/CSF1R/AJUBA/SPRY2/TGFB1/KIT/TLR4/EDN3/RGCC/IGF2/DKK1/PTPRC/THBS1/LTF/EDN1/CCL19	29
GO:0002040	sprouting angiogenesis	25/1151	185/18903	0.000149909	0.00109797	0.000705364	FGF2/ADGRA2/VSTM4/ANGPT1/ITGA5/RHOJ/RSPO3/SPRED1/BMP4/ROBO1/NGFR/ACVRL1/MMRN2/LOXL2/EPHA2/KDR/ANXA1/DLL1/CLEC14A/KLF2/JCAD/CEACAM1/THBS1/PTGS2/EGR3	25
GO:0019724	B cell mediated immunity	28/1151	218/18903	0.000150677	0.0011021	0.000708016	SERPING1/C1S/CD40/CLU/C1R/C7/INPP5D/CFI/HLA-DOA/TGFB1/IL27RA/HLA-E/C3/HLA-DPB1/HLA-DPA1/CD74/HLA-DRA/C1QA/C1QC/HLA-DRB1/C1QB/HLA-DQA1/PTPRC/HLA-DQB2/HLA-DRB5/HLA-DQB1/HLA-DQA2/IGLL5	28
GO:0043536	positive regulation of blood vessel endothelial cell migration	14/1151	75/18903	0.000151455	0.00110628	0.000710705	FGF2/ANGPT1/FGFR1/CD40/RHOJ/TGFB1/KDR/ETS1/ANXA1/PRKCA/JCAD/THBS1/PTGS2/HSPB1	14
GO:0050764	regulation of phagocytosis	17/1151	103/18903	0.000153187	0.00111741	0.000717854	SYT11/RAB31/ANO6/GAS6/MFGE8/CNN2/SIRPA/DYSF/CYBA/C3/ITGA2/PLSCR1/PYCARD/PTPRC/CCL2/IL2RG/TGM2	17
GO:0051960	regulation of nervous system development	48/1151	456/18903	0.000154791	0.00112758	0.000724389	FGF2/SERPINF1/JAM2/IL33/DAAM2/CX3CL1/RND2/NLGN3/NFATC4/EFNA5/RARG/SMARCD3/NTN1/GLI3/MAP1B/IL34/ROBO1/ID4/PLXND1/TGFB1/ANXA2/TNFRSF1B/KIT/FLRT3/SPART/DIXDC1/SLITRK6/IL6ST/ID1/CXCL12/FN1/DLL1/CRABP2/CXCR4/HEYL/DKK1/PTN/CST7/AMIGO2/ID2/SEMA3C/THBS2/IL6/EGR2/BHLHE40/TGM2/DLX1/MME	48
GO:0032905	transforming growth factor beta1 production	6/1151	15/18903	0.000156261	0.00113675	0.000730277	CX3CL1/LUM/LAPTM4B/COL3A1/THBS1/TYROBP	6
GO:0001101	response to acid chemical	20/1151	133/18903	0.000157907	0.00114563	0.000735982	ATP2B4/PDGFC/COL6A1/ZEB1/MMP2/COL4A6/COL16A1/PDGFD/PDGFRA/COL4A1/CCN2/COL1A2/CYBA/COL3A1/CEBPB/KLF2/CYBB/COL1A1/EDN1/COL5A2	20
GO:0002702	positive regulation of production of molecular mediator of immune response	20/1151	133/18903	0.000157907	0.00114563	0.000735982	IL33/GPRC5B/CD40/TLR3/TGFB1/GATA3/KIT/HLA-E/TLR4/CD74/ARID5A/LAPTM5/PYCARD/PTPRC/HLA-F/HLA-A/IL6/NR4A3/SPON2/PGC	20
GO:0097237	cellular response to toxic substance	19/1151	123/18903	0.000159464	0.00115536	0.000742235	GSTP1/CYGB/FBLN5/GPX3/GPX8/GSTM2/ABCG2/PTGS1/GSTM3/DUOX1/ALOX5AP/GPX7/GPX2/SOD2/S100A9/SOD3/PTGS2/GSTA1/ALDH1A1	19
GO:0071900	regulation of protein serine/threonine kinase activity	43/1151	395/18903	0.000160833	0.00116235	0.000746724	ATP2B4/FGF2/CAV1/FERMT2/SLC8A1/PDGFC/MYOCD/FGFR1/PDE5A/ROR2/CD40/GSTP1/SFRP1/CCND2/PDGFD/BMP4/PDGFRB/MEF2C/IL34/ROBO1/CSF1R/AJUBA/SPRY2/SPRY1/TGFB1/PKIG/KIT/SFRP2/TLR4/EDN3/GADD45A/HEG1/TNFAIP3/RGCC/IGF2/DKK1/PYCARD/PTPRC/THBS1/LTF/DUSP1/EDN1/CCL19	43
GO:0061005	cell differentiation involved in kidney development	12/1151	58/18903	0.000160861	0.00116235	0.000746724	EDNRA/ACTA2/GLIS2/TCF21/WWTR1/GLI3/BMP4/MEF2C/GATA3/CD34/EDNRB/LAMB2	12
GO:0042045	epithelial fluid transport	5/1151	10/18903	0.000161553	0.00116579	0.000748932	AQP1/EDNRB/CFTR/EDN1/ITPR1	5
GO:0007584	response to nutrient	22/1151	154/18903	0.000163477	0.00117808	0.000756833	KANK2/SLC8A1/GAS6/SFRP1/TGFBR2/ALDH1A2/SNAI2/MAP1B/A2M/SFRP2/VCAM1/ITGA2/FOLR2/PENK/CYBB/POSTN/COL1A1/SOD2/ALPL/PTGS2/AQP3/CYP1B1	22
GO:0010463	mesenchymal cell proliferation	10/1151	42/18903	0.000165363	0.00118849	0.000763518	PRRX1/FOXF1/ZEB1/TGFBR2/BMP4/DCHS1/FGFR2/FGF7/KDR/GPC3	10
GO:0014002	astrocyte development	10/1151	42/18903	0.000165363	0.00118849	0.000763518	TSPAN2/ROR2/VIM/TLR4/DLL1/C1QA/LRP1/LAMB2/S100A9/IL6	10
GO:0060445	branching involved in salivary gland morphogenesis	7/1151	21/18903	0.000166289	0.00119037	0.000764728	SNAI2/FGFR2/FGF7/PLXND1/NTN4/SEMA3C/TGM2	7
GO:0090026	positive regulation of monocyte chemotaxis	7/1151	21/18903	0.000166289	0.00119037	0.000764728	ANO6/S100A14/CXCL12/AIF1/CCL5/CXCL17/SERPINE1	7
GO:2000725	regulation of cardiac muscle cell differentiation	7/1151	21/18903	0.000166289	0.00119037	0.000764728	FZD7/MYOCD/BMP4/MEF2C/TGFB1/DLL1/DKK1	7
GO:0006692	prostanoid metabolic process	11/1151	50/18903	0.000168495	0.00120136	0.000771787	PTGIS/GSTP1/AKR1B1/PTGDS/PTGS1/PLA2G4A/CD74/ANXA1/EDN1/PTGS2/GSTA1	11
GO:0006693	prostaglandin metabolic process	11/1151	50/18903	0.000168495	0.00120136	0.000771787	PTGIS/GSTP1/AKR1B1/PTGDS/PTGS1/PLA2G4A/CD74/ANXA1/EDN1/PTGS2/GSTA1	11
GO:1902041	regulation of extrinsic apoptotic signaling pathway via death domain receptors	11/1151	50/18903	0.000168495	0.00120136	0.000771787	SFRP1/FAIM2/ARHGEF2/TIMP3/LGALS3/SFRP2/MAL/TNFAIP3/THBS1/SERPINE1/ATF3	11
GO:0050769	positive regulation of neurogenesis	29/1151	231/18903	0.000172976	0.00123168	0.000791266	FGF2/SERPINF1/IL33/CX3CL1/RND2/EFNA5/SMARCD3/NTN1/GLI3/MAP1B/IL34/ROBO1/ID4/PLXND1/TGFB1/TNFRSF1B/KIT/DIXDC1/IL6ST/CXCL12/FN1/CRABP2/CXCR4/PTN/ID2/IL6/EGR2/TGM2/MME	29
GO:0051209	release of sequestered calcium ion into cytosol	19/1151	124/18903	0.00017777	0.00126414	0.000812116	FGF2/FLNA/SLC8A1/JPH2/PLN/CX3CL1/ATP1A2/JPH4/RASA3/DMD/GSTM2/CYBA/CASQ2/CCL21/PTPRC/CORO1A/CASQ1/ITPR1/CCL19	19
GO:0071248	cellular response to metal ion	26/1151	198/18903	0.00017883	0.00127	0.000815881	SERPINF1/PRNP/SYT11/NFATC4/CLIC4/RASGRP2/AQP1/MEF2C/SLC40A1/CACNA1H/ALOX5AP/CYBB/CLDN1/EDN1/MT1A/PTGS2/MT1X/KCNK3/CPNE7/FOS/AOC1/MT1M/JUNB/MT1E/FOSB/MT1G	26
GO:0050654	chondroitin sulfate proteoglycan metabolic process	9/1151	35/18903	0.000186232	0.00132082	0.000848532	CHST3/EGFLAM/SPOCK3/CHST11/DCN/CHST15/CYTL1/NDNF/BGN	9
GO:0007009	plasma membrane organization	23/1151	166/18903	0.000186732	0.00132262	0.000849689	CAV2/EHD2/CAV1/ANXA6/PLSCR4/SYT11/GSN/CLU/ANO6/CAVIN2/MYOF/DYSF/COL5A1/ANXA2/A4GALT/TGFB2/DMKN/CXCR4/FOLR2/PLSCR1/AHNAK/PTPRC/S100A9	23
GO:0001755	neural crest cell migration	12/1151	59/18903	0.000190884	0.00134918	0.000866748	EDNRA/ANXA6/ISL1/EFNB1/CORO1C/NRP2/BMP4/EDNRB/EDN3/FN1/EDN1/SEMA3C	12
GO:0003416	endochondral bone growth	8/1151	28/18903	0.000191485	0.00134918	0.000866748	ANXA6/DDR2/RARB/TGFBR2/RARG/ECM1/FGFR2/COL27A1	8
GO:0010758	regulation of macrophage chemotaxis	8/1151	28/18903	0.000191485	0.00134918	0.000866748	CSF1/RARRES2/IL34/CSF1R/TRPV4/CCL5/THBS1/CXCL17	8
GO:0032703	negative regulation of interleukin-2 production	8/1151	28/18903	0.000191485	0.00134918	0.000866748	PRNP/GBP1/GATA3/CD34/TNFAIP3/LAPTM5/PTPRC/ZFP36	8
GO:0033273	response to vitamin	15/1151	86/18903	0.000196728	0.00138431	0.000889314	KANK2/GAS6/SFRP1/ALDH1A2/SNAI2/MAP1B/ITGA2/FOLR2/PENK/POSTN/COL1A1/SOD2/ALPL/PTGS2/AQP3	15
GO:0032414	positive regulation of ion transmembrane transporter activity	18/1151	115/18903	0.000198408	0.0013943	0.000895737	EDNRA/JPH2/RGN/NLGN3/ATP1B2/ABCB1/DMD/STAC/GSTM2/STAC2/ATP1B1/CTSS/CFTR/CCL2/EDN1/CASQ1/KCNK3/CACNG4	18
GO:0045670	regulation of osteoclast differentiation	13/1151	68/18903	0.000201447	0.00141381	0.000908271	MITF/CSF1/SFRP1/INPP5D/FBN1/TLR3/TLR4/PIK3R1/CEBPB/KLF10/TYROBP/LTF/FOS	13
GO:0032720	negative regulation of tumor necrosis factor production	14/1151	77/18903	0.000202548	0.00141968	0.000912042	AXL/SYT11/VSIR/CX3CL1/GAS6/GSTP1/SIRPA/IL27RA/CD34/TLR4/TNFAIP3/GPNMB/ACP5/ORM1	14
GO:0043277	apoptotic cell clearance	11/1151	51/18903	0.000203147	0.00142018	0.000912359	AXL/GAS6/MFGE8/C3/ANXA1/LRP1/RAC2/THBS1/TYROBP/CCL2/TGM2	11
GO:0060324	face development	11/1151	51/18903	0.000203147	0.00142018	0.000912359	EDNRA/MMP2/ALDH1A2/RARG/CRISPLD2/PDGFRA/TGFB3/RRAS/CLDN5/DKK1/COL1A1	11
GO:0071222	cellular response to lipopolysaccharide	28/1151	222/18903	0.00020534	0.00143365	0.000921011	AXL/PLSCR4/CX3CL1/GSTP1/VIM/SIRPA/MEF2C/CASP1/TGFB1/TNFRSF1B/TLR4/EDNRB/PRKCA/CD14/ARID5A/TNFAIP3/CEBPB/CCL5/CXCL6/PYCARD/LTF/CCL2/CXCL1/CXCL2/IL6/ZFP36/SERPINE1/SPON2	28
GO:0001659	temperature homeostasis	24/1151	178/18903	0.000208583	0.0014544	0.000934343	GJA1/CAV1/PDGFC/GATM/ZNF516/ZNF423/LAMA4/LEPR/FOXO1/EPAS1/MFAP2/PLCL1/TLR4/EDNRB/ID1/G0S2/DIO2/CXCR4/CEBPB/ALPL/LCN2/PTGS2/EGR1/ALDH1A1	24
GO:0051153	regulation of striated muscle cell differentiation	16/1151	96/18903	0.000211071	0.00146794	0.000943043	FZD7/MYOCD/MMP14/PLPP7/BMP4/RBM38/MEF2C/TGFB1/BCL2/TMEM119/HOPX/DMPK/DLL1/DKK1/PI16/EDN1	16
GO:0070664	negative regulation of leukocyte proliferation	16/1151	96/18903	0.000211071	0.00146794	0.000943043	PRNP/IL33/PDE5A/VSIR/GSTP1/INPP5D/BMP4/RASSF5/VTCN1/TNFAIP3/LRRC32/CEBPB/HLA-DRB1/TYROBP/GPNMB/SCGB1A1	16
GO:0006690	icosanoid metabolic process	19/1151	126/18903	0.000219984	0.00152598	0.00098033	PTGIS/GSTP1/AKR1B1/PTGDS/CASP1/PTGS1/GGT6/GGT5/PLA2G4A/CD74/ANXA1/ALOX5AP/PYCARD/MGLL/EDN1/PTGS2/GSTA1/CYP1B1/ALOX15B	19
GO:0032411	positive regulation of transporter activity	19/1151	126/18903	0.000219984	0.00152598	0.00098033	EDNRA/JPH2/RGN/NLGN3/ATP1B2/ABCB1/DMD/STAC/GSTM2/STAC2/ATP1B1/CTSS/CFTR/CCL2/EDN1/CASQ1/KCNK3/SGK1/CACNG4	19
GO:0008543	fibroblast growth factor receptor signaling pathway	15/1151	87/18903	0.000224547	0.00155503	0.000998991	FGF2/FGFR1/SULF2/HHIP/FGFR2/NGFR/SPRY2/SPRY1/FGF7/GATA3/FLRT3/CCN2/SULF1/THBS1/FGFRL1	15
GO:0002011	morphogenesis of an epithelial sheet	12/1151	60/18903	0.000225557	0.00155503	0.000998991	FLNA/PDPN/FERMT2/ITGA5/AJUBA/COL5A1/ACVRL1/FLRT3/HOXB2/CEACAM1/FERMT1/CCN1	12
GO:0045599	negative regulation of fat cell differentiation	12/1151	60/18903	0.000225557	0.00155503	0.000998991	FERMT2/TGFB1I1/WWTR1/JDP2/FOXO1/ID4/TGFB1/GATA3/ZFP36L2/TRPV4/SOD2/IL6	12
GO:0055008	cardiac muscle tissue morphogenesis	12/1151	60/18903	0.000225557	0.00155503	0.000998991	EDNRA/TGFBR3/ISL1/FOXC1/TPM1/FGFR2/TGFB1/S1PR1/ACTC1/TGFB2/HEG1/TNNC1	12
GO:0031098	stress-activated protein kinase signaling cascade	30/1151	246/18903	0.000225618	0.00155503	0.000998991	FZD7/DACT1/GSTP1/SFRP1/MAP3K20/CRYAB/BMP4/FOXO1/SIRPA/MDFIC/TLR3/ZFP36L1/CCN2/TGFB2/DIXDC1/PAGE4/SFRP2/IGFBP6/TLR4/TRPV4/GADD45A/CCL21/PYCARD/SERPINF2/DUSP1/PER1/CCL19/CDC42EP5/GADD45B/ZFP36	30
GO:1903829	positive regulation of protein localization	47/1151	451/18903	0.000227554	0.00156637	0.00100627	ATP2B4/STOM/FLNA/FERMT2/CLIP3/SORBS1/PRNP/TMEM35A/ISL1/SYT11/MSN/ACSL4/GLIS2/MAP1A/GAS6/ANO1/EPHA3/EPB41L2/RAB38/WWTR1/GLI3/STAC/NGFR/TGFB1/LGALS3/EPHA2/TGFB3/APBB1/TGFB2/ITGA3/TLR4/PECAM1/STAC2/HCLS1/PIK3R1/CFTR/LRP1/ITGB2/HLA-DRB1/RAC2/RAMP3/TYROBP/MYOM1/PTGS2/ANG/CD38/OR51E2	47
GO:0032928	regulation of superoxide anion generation	7/1151	22/18903	0.000231134	0.00157687	0.00101302	GSTP1/TGFB1/CYBA/ITGB2/TYROBP/CD177/ACP5	7
GO:0033630	positive regulation of cell adhesion mediated by integrin	7/1151	22/18903	0.000231134	0.00157687	0.00101302	TGFB2/SFRP2/CCL21/CD3E/CCL5/FERMT1/RAC3	7
GO:0051767	nitric-oxide synthase biosynthetic process	7/1151	22/18903	0.000231134	0.00157687	0.00101302	IL33/GSTP1/TLR4/KDR/AKAP12/CCL2/EDN1	7
GO:0051769	regulation of nitric-oxide synthase biosynthetic process	7/1151	22/18903	0.000231134	0.00157687	0.00101302	IL33/GSTP1/TLR4/KDR/AKAP12/CCL2/EDN1	7
GO:0061042	vascular wound healing	7/1151	22/18903	0.000231134	0.00157687	0.00101302	MCAM/NDNF/CD34/KDR/TNFAIP3/CXCR4/SERPINE1	7
GO:0072574	hepatocyte proliferation	7/1151	22/18903	0.000231134	0.00157687	0.00101302	LIMS2/HPN/TNFAIP3/CEBPB/PTN/CEACAM1/IL6	7
GO:0072575	epithelial cell proliferation involved in liver morphogenesis	7/1151	22/18903	0.000231134	0.00157687	0.00101302	LIMS2/HPN/TNFAIP3/CEBPB/PTN/CEACAM1/IL6	7
GO:0002366	leukocyte activation involved in immune response	34/1151	293/18903	0.000232819	0.00158636	0.00101912	FOXF1/IL33/CD40/LGALS1/PTGDS/DYSF/FGL2/TGFB1/GATA3/KIT/LGALS3/IL27RA/TLR4/CD74/ANXA1/GPR183/HLA-DRA/DLL1/ITGB2/HLA-DRB1/RAC2/PYCARD/PTPRC/CEACAM1/CORO1A/TYROBP/ITM2A/HLA-F/CCL19/IL6/CD177/NR4A3/JUNB/CHGA	34
GO:0090218	positive regulation of lipid kinase activity	9/1151	36/18903	0.000235013	0.00159928	0.00102742	FGF2/TNFAIP8L3/PDGFRB/PDGFRA/TGFB1/KIT/CCL21/IRS1/CCL19	9
GO:0030852	regulation of granulocyte differentiation	6/1151	16/18903	0.000237166	0.00161161	0.00103534	INPP5D/RUNX1/HCLS1/EVI2B/C1QC/CEACAM1	6
GO:1904019	epithelial cell apoptotic process	20/1151	137/18903	0.000237424	0.00161161	0.00103534	EDNRA/ANGPT1/GSN/CD40/ANO6/CD248/GAS6/TGFBR2/NDNF/ZFP36L1/GATA3/BCL2/KDR/TNFAIP3/RGCC/THBS1/CCL2/IL6/ZFP36/SERPINE1	20
GO:0043502	regulation of muscle adaptation	16/1151	97/18903	0.000238721	0.00161837	0.00103968	ATP2B4/PDE5A/SGCA/LMCD1/FOXO1/TNFRSF1B/FBXO32/IL6ST/IGFBP5/PRKCA/AIF1/PI16/EDN1/CASQ1/NR4A3/TNNC1	16
GO:1902904	negative regulation of supramolecular fiber organization	23/1151	169/18903	0.000244019	0.0016522	0.00106141	LMOD1/EMILIN1/CLIP3/BMERB1/GSN/SVIL/CLU/MET/CRYAB/FHOD3/ARHGEF2/MYADM/MAP1B/TMOD1/S1PR1/CAPG/KANK1/PIK3R1/GMFG/CORO1A/MYOC/RHPN1/TMSB15A	23
GO:0045936	negative regulation of phosphate metabolic process	46/1151	440/18903	0.000245809	0.0016612	0.0010672	CAV1/EMILIN1/SLC8A1/PRNP/DDR2/MYOCD/ANGPT1/KIRREL1/RGN/FBLN1/CORO1C/GSTP1/PLPP3/SFRP1/WWTR1/SPRED1/BMP4/SIRPA/MYADM/DMD/AJUBA/SPRY2/SPRY1/TGFB1/PKIG/LGALS3/TGFB2/MVP/SFRP2/GADD45A/HEG1/PID1/TNFAIP3/LRP1/SOCS3/DKK1/IGFBP3/PYCARD/DUSP6/PTPRC/CEACAM1/DUSP1/PTPRT/HSPB1/DDIT4/GADD45B	46
GO:0003279	cardiac septum development	17/1151	107/18903	0.000245966	0.0016612	0.0010672	TGFBR3/ISL1/LMO4/TGFBR2/NRP2/PDE2A/BMP4/ROBO1/FGFR2/PLXND1/GATA3/TGFB2/HEG1/HEYL/CCN1/FGFRL1/SEMA3C	17
GO:0009308	amine metabolic process	18/1151	117/18903	0.000247409	0.00166694	0.00107089	AOC3/EDNRA/ATP2B4/HAAO/INMT/ATCAY/EPAS1/MOXD1/GATA3/TGFB2/MAOB/VCAM1/ITGB2/ALDH2/NNMT/SLC22A3/AOC1/NPY	18
GO:0006575	cellular modified amino acid metabolic process	24/1151	180/18903	0.000247436	0.00166694	0.00107089	BHMT2/SLC16A2/GATM/GSTP1/GSTM5/CTSB/GSTM4/CTSK/GSTM2/GATA3/GGT6/GGT5/GSTM3/DUOX1/DUOXA1/DIO2/CPQ/HPN/PLSCR1/MBOAT1/CKM/SOD2/GSTA1/FOLH1	24
GO:0032689	negative regulation of interferon-gamma production	10/1151	44/18903	0.000249545	0.00167904	0.00107866	AXL/PRNP/IL33/VSIR/GAS6/GATA3/TLR4/LAPTM5/HLA-DRB1/SCGB1A1	10
GO:0010563	negative regulation of phosphorus metabolic process	46/1151	441/18903	0.000258708	0.00173852	0.00111687	CAV1/EMILIN1/SLC8A1/PRNP/DDR2/MYOCD/ANGPT1/KIRREL1/RGN/FBLN1/CORO1C/GSTP1/PLPP3/SFRP1/WWTR1/SPRED1/BMP4/SIRPA/MYADM/DMD/AJUBA/SPRY2/SPRY1/TGFB1/PKIG/LGALS3/TGFB2/MVP/SFRP2/GADD45A/HEG1/PID1/TNFAIP3/LRP1/SOCS3/DKK1/IGFBP3/PYCARD/DUSP6/PTPRC/CEACAM1/DUSP1/PTPRT/HSPB1/DDIT4/GADD45B	46
GO:0007188	adenylate cyclase-modulating G protein-coupled receptor signaling pathway	30/1151	248/18903	0.000259891	0.00174264	0.00111952	EDNRA/ATP2B4/ADCY5/FLNA/GNAL/LPAR1/GNAO1/PTGER2/PLN/GPR161/GNAZ/ADCY3/GNG2/PDE4A/PDE2A/MRAP2/OXER1/S1PR1/ADGRL4/ADRA1D/S1PR3/PRKCA/ADGRL2/AKAP12/CALCRL/RAMP3/RGS1/ADRA2C/EDN1/CHGA	30
GO:0008064	regulation of actin polymerization or depolymerization	22/1151	159/18903	0.000260295	0.00174264	0.00111952	LMOD1/KIRREL1/GSN/CDC42EP3/SVIL/DAAM2/CFL2/FHOD3/FCHSD2/MYADM/CDC42EP4/TMOD1/ELN/CAPG/KANK1/HCLS1/CXCL12/CCL21/PYCARD/CORO1A/TMSB15A/CDC42EP5	22
GO:0036294	cellular response to decreased oxygen levels	22/1151	159/18903	0.000260295	0.00174264	0.00111952	KCNMB1/SLC8A1/PTGIS/DDR2/SFRP1/SLC2A4/AQP1/EPAS1/AJUBA/NDNF/ZFP36L1/CD34/BCL2/SLC29A1/RGCC/CYBB/EDN1/PTGS2/AQP3/EGR1/KCNK3/FOS	22
GO:0032535	regulation of cellular component size	40/1151	367/18903	0.000261638	0.00174946	0.0011239	LMOD1/KIRREL1/SLC12A4/GSN/CDC42EP3/SVIL/DAAM2/CFL2/MSN/DPYSL2/KCNMA1/ANO6/RND2/EFNA5/RARG/FHOD3/NTN1/FCHSD2/AQP1/MYADM/MAP1B/CDC42EP4/TMOD1/ELN/CAPG/SPART/KANK1/TRPV4/HCLS1/CXCL12/FN1/CCL21/CRABP2/IL7R/PYCARD/CORO1A/EDN1/TMSB15A/SEMA3C/CDC42EP5	40
GO:0090497	mesenchymal cell migration	12/1151	61/18903	0.000265447	0.00177272	0.00113885	EDNRA/ANXA6/ISL1/EFNB1/CORO1C/NRP2/BMP4/EDNRB/EDN3/FN1/EDN1/SEMA3C	12
GO:0035637	multicellular organismal signaling	23/1151	170/18903	0.00026629	0.00177615	0.00114105	ATP2B4/GJA1/CAV1/FLNA/SLC8A1/ISL1/PLN/ABCC9/GJC1/ATP1A2/ATP1B2/NFASC/SCN7A/CNTNAP1/KCNH2/JAM3/P2RX1/S1PR1/CASQ2/CACNA1H/ATP1B1/ITGA2/CACNG4	23
GO:0051701	biological process involved in interaction with host	26/1151	203/18903	0.000267119	0.00177947	0.00114318	CAV2/CAV1/AXL/GSN/GAS6/ITGA5/CTSB/LGALS1/NCAM1/TRIM22/EPHA2/ITGB6/CD74/CH25H/IFITM3/IFITM2/ITGA2/CXCR4/SELPLG/CD4/HLA-DRB1/PLSCR1/IFITM1/LTF/CLDN1/ANPEP	26
GO:0061333	renal tubule morphogenesis	14/1151	79/18903	0.000267833	0.00178202	0.00114481	FGF2/TCF21/EYA1/GLI3/BMP4/HOXD11/DCHS1/MEF2C/ILK/PBX1/GATA3/COL4A1/BCL2/GPC3	14
GO:1990868	response to chemokine	16/1151	98/18903	0.000269455	0.00178838	0.00114891	FOXC1/CX3CL1/ROBO1/CXCL12/ACKR1/CCL21/CXCR4/CCL5/ACKR3/CXCL6/CCL2/DUSP1/EDN1/CXCL1/CCL19/CXCL2	16
GO:1990869	cellular response to chemokine	16/1151	98/18903	0.000269455	0.00178838	0.00114891	FOXC1/CX3CL1/ROBO1/CXCL12/ACKR1/CCL21/CXCR4/CCL5/ACKR3/CXCL6/CCL2/DUSP1/EDN1/CXCL1/CCL19/CXCL2	16
GO:0090596	sensory organ morphogenesis	32/1151	272/18903	0.000274038	0.00181655	0.001167	MEIS1/EDNRA/FGF2/PRRX1/EFEMP1/ZEB1/RARB/RARG/EYA1/NTN1/COL8A2/GLI3/BMP4/FBN1/AQP1/FGFR2/COL5A1/SPRY2/ITGA8/MFAP2/GATA3/EPHA2/BCL2/KDR/SLITRK6/HPN/DLL1/FRZB/FOXF2/COL8A1/EDN1/COL5A2	32
GO:0043200	response to amino acid	18/1151	118/18903	0.000275641	0.00182493	0.00117238	PDGFC/COL6A1/ZEB1/MMP2/COL4A6/COL16A1/PDGFD/PDGFRA/COL4A1/CCN2/COL1A2/CYBA/COL3A1/CEBPB/CYBB/COL1A1/EDN1/COL5A2	18
GO:0051651	maintenance of location in cell	28/1151	226/18903	0.000276984	0.00183157	0.00117665	FGF2/CAV1/FLNA/SLC8A1/ANXA6/JPH2/GSN/GRIK5/PLN/CX3CL1/ATP1A2/JPH4/RASA3/SRGN/DMD/GSTM2/CYBA/CASQ2/CCL21/CD4/PTPRC/CORO1A/CASQ1/ITPR1/S100A9/CCL19/TMSB15A/LCN2	28
GO:0002604	regulation of dendritic cell antigen processing and presentation	5/1151	11/18903	0.000281327	0.00184892	0.00118779	FGL2/CD74/CCL21/THBS1/CCL19	5
GO:0034350	regulation of glial cell apoptotic process	5/1151	11/18903	0.000281327	0.00184892	0.00118779	GAS6/PRKCA/AKAP12/DLL1/CCL2	5
GO:0036363	transforming growth factor beta activation	5/1151	11/18903	0.000281327	0.00184892	0.00118779	LTBP1/ITGB6/LTBP3/ITGB8/LRRC32	5
GO:0061299	retina vasculature morphogenesis in camera-type eye	5/1151	11/18903	0.000281327	0.00184892	0.00118779	RHOJ/CLIC4/NDP/COL4A1/CYP1B1	5
GO:0110011	regulation of basement membrane organization	5/1151	11/18903	0.000281327	0.00184892	0.00118779	NID1/PHLDB1/LAMA2/LAMB1/LAMB2	5
GO:0002709	regulation of T cell mediated immunity	15/1151	89/18903	0.000290508	0.00189924	0.00122012	MR1/GATA3/TNFRSF1B/HLA-E/AHR/ARID5A/HLA-DRA/IL7R/HLA-DRB1/PTPRC/CEACAM1/HLA-F/HLA-A/IL6/AZGP1	15
GO:0045104	intermediate filament cytoskeleton organization	15/1151	89/18903	0.000290508	0.00189924	0.00122012	SYNM/NES/DST/DES/VIM/KRT23/KRT5/KRT15/KRT7/KRT17/KRT4/KRT14/KRT13/KRT19/NEFH	15
GO:0048678	response to axon injury	15/1151	89/18903	0.000290508	0.00189924	0.00122012	FGF2/AXL/FLNA/DPYSL3/ISL1/MMP2/TNC/MAP1B/FLRT3/BCL2/AIF1/LAMB2/PTN/TYROBP/SOD2	15
GO:0052372	modulation by symbiont of entry into host	11/1151	53/18903	0.00029075	0.00189924	0.00122012	CAV1/GSN/LGALS1/TRIM22/CD74/CH25H/IFITM3/IFITM2/CD4/HLA-DRB1/IFITM1	11
GO:0060071	Wnt signaling pathway, planar cell polarity pathway	11/1151	53/18903	0.00029075	0.00189924	0.00122012	PRICKLE2/FZD7/ROR2/DACT1/SFRP1/RSPO3/SFRP2/PLEKHA4/GPC3/DKK1/VANGL2	11
GO:0003176	aortic valve development	9/1151	37/18903	0.000293936	0.00191772	0.00123199	EMILIN1/SNAI2/BMP4/ROBO1/TGFB1/GATA3/TNFRSF1B/ELN/HEYL	9
GO:0014902	myotube differentiation	19/1151	129/18903	0.000299718	0.00195307	0.0012547	CAV2/EHD2/MYOCD/MMP14/JAM2/PLPP7/MYOF/CNTNAP1/RBM38/MEF2C/BCL2/TMEM119/PLEKHO1/CACNA1H/KLF5/DMPK/CD53/SCGB3A1/ACTA1	19
GO:0030038	contractile actin filament bundle assembly	17/1151	109/18903	0.000308409	0.00200485	0.00128797	FERMT2/SORBS1/LPAR1/TPM1/SFRP1/MET/PDLIM1/ZYX/ELN/CCN2/S1PR1/TGFB3/PIK3R1/RGCC/MYOC/RHPN1/SERPINF2	17
GO:0043149	stress fiber assembly	17/1151	109/18903	0.000308409	0.00200485	0.00128797	FERMT2/SORBS1/LPAR1/TPM1/SFRP1/MET/PDLIM1/ZYX/ELN/CCN2/S1PR1/TGFB3/PIK3R1/RGCC/MYOC/RHPN1/SERPINF2	17
GO:0034695	response to prostaglandin E	7/1151	23/18903	0.000314893	0.00204206	0.00131187	TGFBR3/PTGER2/SFRP1/GNG2/A2M/CCL21/CCL19	7
GO:0072576	liver morphogenesis	7/1151	23/18903	0.000314893	0.00204206	0.00131187	LIMS2/HPN/TNFAIP3/CEBPB/PTN/CEACAM1/IL6	7
GO:1905475	regulation of protein localization to membrane	23/1151	172/18903	0.000316262	0.00204847	0.00131599	ATP2B4/STOM/CLIP3/SORBS1/PRNP/MMP14/GSN/EPHA3/STAC/MRAP2/TGFB1/TAMALIN/GBP1/LGALS3/EPHA2/ITGA3/STAC2/PIK3R1/GPC3/PID1/LRP1/ITGB2/RAMP3	23
GO:0030833	regulation of actin filament polymerization	20/1151	140/18903	0.000318236	0.00205877	0.00132261	LMOD1/KIRREL1/GSN/CDC42EP3/SVIL/DAAM2/FHOD3/FCHSD2/MYADM/CDC42EP4/TMOD1/ELN/CAPG/KANK1/HCLS1/CCL21/PYCARD/CORO1A/TMSB15A/CDC42EP5	20
GO:0030204	chondroitin sulfate metabolic process	8/1151	30/18903	0.000323403	0.00208717	0.00134086	CHST3/EGFLAM/SPOCK3/CHST11/DCN/CHST15/NDNF/BGN	8
GO:0060325	face morphogenesis	8/1151	30/18903	0.000323403	0.00208717	0.00134086	MMP2/CRISPLD2/PDGFRA/TGFB3/RRAS/CLDN5/DKK1/COL1A1	8
GO:0010586	miRNA metabolic process	15/1151	90/18903	0.000329321	0.00211521	0.00135886	FGF2/MYOCD/NFATC4/BMP4/NGFR/TGFB1/GATA3/TEAD1/TGFB2/NR3C1/ETS1/KLF5/ATOH8/EGR1/FOS	15
GO:0045103	intermediate filament-based process	15/1151	90/18903	0.000329321	0.00211521	0.00135886	SYNM/NES/DST/DES/VIM/KRT23/KRT5/KRT15/KRT7/KRT17/KRT4/KRT14/KRT13/KRT19/NEFH	15
GO:0055006	cardiac cell development	15/1151	90/18903	0.000329321	0.00211521	0.00135886	TGFBR3/SLC8A1/ASB2/MYH11/FHL2/ISL1/SGCB/FHOD3/BMP4/PDGFRB/PDGFRA/SPRY1/ACTC1/PI16/EDN1	15
GO:0070098	chemokine-mediated signaling pathway	15/1151	90/18903	0.000329321	0.00211521	0.00135886	FOXC1/CX3CL1/ROBO1/CXCL12/ACKR1/CCL21/CXCR4/CCL5/ACKR3/CXCL6/CCL2/EDN1/CXCL1/CCL19/CXCL2	15
GO:0045621	positive regulation of lymphocyte differentiation	19/1151	130/18903	0.000331384	0.00212592	0.00136575	AXL/MMP14/VSIR/GAS6/TGFBR2/SMARCD3/GLI3/INPP5D/GATA3/RUNX1/CD74/ANXA1/HLA-DRA/IL7R/HLA-DRB1/PTPRC/IL2RG/CCL19/EGR3	19
GO:0030832	regulation of actin filament length	22/1151	162/18903	0.00033998	0.00217846	0.0013995	LMOD1/KIRREL1/GSN/CDC42EP3/SVIL/DAAM2/CFL2/FHOD3/FCHSD2/MYADM/CDC42EP4/TMOD1/ELN/CAPG/KANK1/HCLS1/CXCL12/CCL21/PYCARD/CORO1A/TMSB15A/CDC42EP5	22
GO:0098869	cellular oxidant detoxification	16/1151	100/18903	0.000341315	0.00218442	0.00140333	GSTP1/CYGB/FBLN5/GPX3/GPX8/GSTM2/PTGS1/DUOX1/ALOX5AP/GPX7/GPX2/SOD2/S100A9/SOD3/PTGS2/GSTA1	16
GO:0032872	regulation of stress-activated MAPK cascade	25/1151	195/18903	0.00034214	0.0021871	0.00140505	FZD7/DACT1/GSTP1/SFRP1/BMP4/FOXO1/SIRPA/MDFIC/TLR3/CCN2/TGFB2/DIXDC1/PAGE4/SFRP2/IGFBP6/TLR4/TRPV4/GADD45A/CCL21/PYCARD/SERPINF2/DUSP1/PER1/CCL19/GADD45B	25
GO:0050728	negative regulation of inflammatory response	24/1151	184/18903	0.000344741	0.0022011	0.00141405	NT5E/SERPINF1/PTGIS/FOXF1/ISL1/SYT11/CX3CL1/GSTP1/WFDC1/SIRPA/CD200/GATA3/TNFRSF1B/TNFAIP3/CALCRL/SOCS3/HLA-DRB1/CST7/PTPRC/CXCL17/ZFP36/SAA1/ACP5/NPY	24
GO:0038065	collagen-activated signaling pathway	6/1151	17/18903	0.000347712	0.00221219	0.00142117	DDR2/COL4A6/COL4A2/COL4A1/ITGA2/COL1A1	6
GO:0045217	cell-cell junction maintenance	6/1151	17/18903	0.000347712	0.00221219	0.00142117	FERMT2/KIRREL1/KIFC3/CNTNAP1/CSF1R/CD177	6
GO:0072109	glomerular mesangium development	6/1151	17/18903	0.000347712	0.00221219	0.00142117	ACTA2/PDGFD/BMP4/PDGFRB/CD34/EGR1	6
GO:0090090	negative regulation of canonical Wnt signaling pathway	20/1151	141/18903	0.000350052	0.00222444	0.00142904	RBMS3/CAV1/DKK3/ISL1/DACT3/IGFBP4/DACT1/SFRP1/MCC/WWTR1/GLI3/SNAI2/FOXO1/SFRP2/IGFBP6/GPC3/FRZB/DKK1/FERMT1/EGR1	20
GO:0072330	monocarboxylic acid biosynthetic process	27/1151	218/18903	0.000354857	0.00225231	0.00144694	PTGIS/RGN/GATM/ACACB/CES1/GSTP1/ALDH1A2/GSTM4/PTGDS/CYP27A1/RBP1/GSTM2/PTGS1/PDK4/PLA2G4A/CD74/ANXA1/CRABP2/MGLL/SCD5/CEACAM1/EDN1/PTGS2/FASN/AMACR/ACSM1/ALOX15B	27
GO:0042698	ovulation cycle	13/1151	72/18903	0.000363283	0.00229838	0.00147654	AXL/SERPINF1/MMP2/PDGFRA/PAM/A2M/TGFB3/TGFB2/PTN/ADAMTS1/TIMP4/EGR1/CYP1B1	13
GO:0045600	positive regulation of fat cell differentiation	13/1151	72/18903	0.000363283	0.00229838	0.00147654	SFRP1/SNAI2/RARRES2/ZFP36L1/CCDC3/SFRP2/KLF5/FRZB/CEBPB/WIF1/ID2/PTGS2/ZFP36	13
GO:0045453	bone resorption	12/1151	63/18903	0.000363397	0.00229838	0.00147654	INPP5D/CTSK/CSF1R/S1PR1/LTBP3/TMEM119/PDK4/PRKCA/TNFAIP3/IL6/ACP5/CD38	12
GO:0040036	regulation of fibroblast growth factor receptor signaling pathway	9/1151	38/18903	0.000364562	0.00230304	0.00147953	FGF2/SULF2/HHIP/NGFR/SPRY2/SPRY1/GATA3/SULF1/THBS1	9
GO:0046596	regulation of viral entry into host cell	10/1151	46/18903	0.000366935	0.0023126	0.00148567	GSN/LGALS1/TRIM22/CD74/CH25H/IFITM3/IFITM2/CD4/HLA-DRB1/IFITM1	10
GO:0055010	ventricular cardiac muscle tissue morphogenesis	10/1151	46/18903	0.000366935	0.0023126	0.00148567	EDNRA/TGFBR3/ISL1/FOXC1/TPM1/FGFR2/TGFB1/TGFB2/HEG1/TNNC1	10
GO:0030178	negative regulation of Wnt signaling pathway	23/1151	174/18903	0.000374291	0.00235619	0.00151368	RBMS3/CAV1/DKK3/ISL1/DACT3/IGFBP4/DACT1/SFRP1/MCC/NFATC4/WWTR1/GLI3/SNAI2/FOXO1/SFRP2/IGFBP6/GPC3/FRZB/LRP1/DKK1/WIF1/FERMT1/EGR1	23
GO:0032355	response to estradiol	18/1151	121/18903	0.000377815	0.00237559	0.00152614	MMP2/SFRP1/ALDH1A2/CRYAB/PDGFRB/MAP1B/PAM/TGFB1/CCN2/ANXA1/ITGA2/RAMP3/PENK/COL1A1/PTGS2/SSTR1/CYP1B1/CD38	18
GO:1903900	regulation of viral life cycle	20/1151	142/18903	0.000384606	0.00241547	0.00155176	AXL/APOBEC3C/GSN/IFI16/LGALS1/APOBEC3G/TRIM22/BCL2/CD74/CH25H/IFITM3/IFITM2/CCL5/CD4/HLA-DRB1/PLSCR1/IFITM1/BST2/LTF/MX1	20
GO:0048708	astrocyte differentiation	14/1151	82/18903	0.000399263	0.00250459	0.00160902	TSPAN2/ROR2/PLPP3/VIM/ID4/TLR4/IL6ST/DLL1/C1QA/LRP1/LAMB2/S100A9/ID2/IL6	14
GO:0032409	regulation of transporter activity	36/1151	326/18903	0.000405803	0.00254265	0.00163347	EDNRA/STOM/CAV1/PRNP/JPH2/RGN/PLN/FHL1/ABCC9/NLGN3/ATP1A2/JPH4/FXYD6/ATP1B2/MEF2C/ABCB1/KCNAB1/DMD/STAC/GEM/GSTM2/BCL2/STAC2/CASQ2/FXYD5/ATP1B1/CTSS/CFTR/AHNAK/RRAD/CCL2/EDN1/CASQ1/KCNK3/SGK1/CACNG4	36
GO:2000107	negative regulation of leukocyte apoptotic process	11/1151	55/18903	0.000408201	0.0025547	0.00164121	AXL/GAS6/BMP4/BCL2/CD74/HCLS1/CXCL12/CCL21/IL7R/CCL5/CCL19	11
GO:0001916	positive regulation of T cell mediated cytotoxicity	8/1151	31/18903	0.000412833	0.00256874	0.00165022	MR1/HLA-E/HLA-DRA/HLA-DRB1/PTPRC/HLA-F/HLA-A/AZGP1	8
GO:0001945	lymph vessel development	8/1151	31/18903	0.000412833	0.00256874	0.00165022	FGF2/PDPN/FOXC1/ACVRL1/EPHA2/KDR/HEG1/CLEC14A	8
GO:0034694	response to prostaglandin	8/1151	31/18903	0.000412833	0.00256874	0.00165022	TGFBR3/PTGER2/SFRP1/GNG2/A2M/CCL21/EDN1/CCL19	8
GO:0060055	angiogenesis involved in wound healing	8/1151	31/18903	0.000412833	0.00256874	0.00165022	MCAM/CX3CL1/NDNF/CD34/KDR/TNFAIP3/CXCR4/SERPINE1	8
GO:0071295	cellular response to vitamin	8/1151	31/18903	0.000412833	0.00256874	0.00165022	KANK2/GAS6/SFRP1/SNAI2/FOLR2/PENK/POSTN/COL1A1	8
GO:0061035	regulation of cartilage development	13/1151	73/18903	0.000417749	0.00259332	0.00166602	EFEMP1/RARB/RARG/GLI3/SNAI2/BMP4/CTSK/ACVRL1/CCN2/LOXL2/LTBP3/FRZB/CCN1	13
GO:0072678	T cell migration	13/1151	73/18903	0.000417749	0.00259332	0.00166602	MSN/ECM1/CD200/IL27RA/S1PR1/CXCL12/GPR183/CCL21/AIF1/CCL5/PYCARD/CORO1A/CCL2	13
GO:0009791	post-embryonic development	15/1151	92/18903	0.000420465	0.00260717	0.00167492	EFEMP1/ETNK2/CHST11/BMP4/FBN1/FGFR2/MFAP2/GATA3/BCL2/NDN/KDR/HEG1/SOD2/ITPR1/SEMA3C	15
GO:0060907	positive regulation of macrophage cytokine production	7/1151	24/18903	0.000421347	0.00260963	0.0016765	GPRC5B/TLR3/TLR4/CD74/LAPTM5/PYCARD/SPON2	7
GO:0010212	response to ionizing radiation	20/1151	143/18903	0.000422093	0.00261124	0.00167753	IFI16/SFRP1/CCND2/MAP3K20/CRYAB/EYA1/SNAI2/GATA3/ITGB6/BCL2/CYBA/RHOB/SFRP2/ANXA1/GADD45A/THBD/VCAM1/PTPRC/SOD2/EGR1	20
GO:0070302	regulation of stress-activated protein kinase signaling cascade	25/1151	198/18903	0.000431794	0.00266819	0.00171411	FZD7/DACT1/GSTP1/SFRP1/BMP4/FOXO1/SIRPA/MDFIC/TLR3/CCN2/TGFB2/DIXDC1/PAGE4/SFRP2/IGFBP6/TLR4/TRPV4/GADD45A/CCL21/PYCARD/SERPINF2/DUSP1/PER1/CCL19/GADD45B	25
GO:0045834	positive regulation of lipid metabolic process	21/1151	154/18903	0.000434082	0.00267925	0.00172122	FGF2/SORBS1/RGN/CES1/RAB38/TNFAIP8L3/FABP3/PDGFRB/PDGFRA/TGFB1/CCDC3/KIT/CD74/ANXA1/CCL21/IRS1/CCN1/HSD17B13/CCL19/PTGS2/NR4A3	21
GO:0045601	regulation of endothelial cell differentiation	10/1151	47/18903	0.00044099	0.00271254	0.00174261	VCL/ZEB1/BMP4/ACVRL1/S1PR3/ID1/ATOH8/CLDN5/APOLD1/CEACAM1	10
GO:0061383	trabecula morphogenesis	10/1151	47/18903	0.00044099	0.00271254	0.00174261	TGFBR3/FHL2/MMP2/SFRP1/SLC40A1/S1PR1/TGFB2/HEG1/ADAMTS1/COL1A1	10
GO:0097028	dendritic cell differentiation	10/1151	47/18903	0.00044099	0.00271254	0.00174261	AXL/GAS6/TGFBR2/TMEM176A/ITGB6/TMEM176B/ITGB8/CEBPB/CCL19/UBD	10
GO:0042310	vasoconstriction	14/1151	83/18903	0.000453821	0.00278828	0.00179126	EDNRA/CAV1/SLC8A1/ACTA2/MMP2/ATP1A2/P2RX1/ADRA1D/EDNRB/EDN3/ADRA2C/EDN1/PTGS2/CD38	14
GO:0010936	negative regulation of macrophage cytokine production	5/1151	12/18903	0.000458125	0.00279873	0.00179798	AXL/TGFB1/TGFB3/TGFB2/ACP5	5
GO:0032908	regulation of transforming growth factor beta1 production	5/1151	12/18903	0.000458125	0.00279873	0.00179798	CX3CL1/LUM/LAPTM4B/THBS1/TYROBP	5
GO:0038063	collagen-activated tyrosine kinase receptor signaling pathway	5/1151	12/18903	0.000458125	0.00279873	0.00179798	DDR2/COL4A6/COL4A2/COL4A1/COL1A1	5
GO:0043589	skin morphogenesis	5/1151	12/18903	0.000458125	0.00279873	0.00179798	ITGB4/TP63/COL1A2/ITGA2/COL1A1	5
GO:0071472	cellular response to salt stress	5/1151	12/18903	0.000458125	0.00279873	0.00179798	EFHD1/AKR1B1/AQP1/ZFP36L1/TRPV4	5
GO:0007265	Ras protein signal transduction	38/1151	353/18903	0.000469536	0.00286518	0.00184067	KANK2/FGF2/SYDE1/PDPN/LPAR1/CDC42EP3/ARHGEF25/RERG/CSF1/STARD8/RGL1/RAB9B/MRAS/RHOJ/MET/ARHGEF2/NTN1/RASGRP2/PDGFRB/RASA3/ROBO1/CDC42EP4/MAPRE2/NGFR/SPRY2/SPRY1/KANK1/TGFB2/COL1A2/ITGA3/RHOB/COL3A1/HEG1/RRAS/AIF1/RAC2/MYOC/CDC42EP5	38
GO:1903169	regulation of calcium ion transmembrane transport	24/1151	188/18903	0.0004742	0.00289036	0.00185684	CAV1/SLC8A1/PRNP/JPH2/RGN/PLN/CX3CL1/ATP1A2/JPH4/DMD/STAC/GEM/P2RX1/GSTM2/BCL2/CYBA/STAC2/CASQ2/ATP1B1/RAMP3/AHNAK/RRAD/CORO1A/CASQ1	24
GO:0001707	mesoderm formation	13/1151	74/18903	0.00047899	0.00290638	0.00186713	GJA1/FOXF1/FOXC1/EYA1/BMP4/ITGB4/FGFR2/ITGA8/EPHA2/ITGA3/SFRP2/ITGA2/DKK1	13
GO:0001736	establishment of planar polarity	13/1151	74/18903	0.00047899	0.00290638	0.00186713	PRICKLE2/FZD7/ROR2/DACT1/SFRP1/RSPO3/TP63/SFRP2/PLEKHA4/GPC3/FOXF2/DKK1/VANGL2	13
GO:0003281	ventricular septum development	13/1151	74/18903	0.00047899	0.00290638	0.00186713	TGFBR3/LMO4/TGFBR2/PDE2A/BMP4/ROBO1/FGFR2/GATA3/TGFB2/HEG1/HEYL/CCN1/FGFRL1	13
GO:0007164	establishment of tissue polarity	13/1151	74/18903	0.00047899	0.00290638	0.00186713	PRICKLE2/FZD7/ROR2/DACT1/SFRP1/RSPO3/TP63/SFRP2/PLEKHA4/GPC3/FOXF2/DKK1/VANGL2	13
GO:0043551	regulation of phosphatidylinositol 3-kinase activity	11/1151	56/18903	0.000480428	0.00291182	0.00187063	FGF2/TNFAIP8L3/PDGFRB/PDGFRA/TGFB1/KIT/PIK3R1/CCL21/SOCS3/IRS1/CCL19	11
GO:0071219	cellular response to molecule of bacterial origin	28/1151	234/18903	0.00048951	0.00296352	0.00190384	AXL/PLSCR4/CX3CL1/GSTP1/VIM/SIRPA/MEF2C/CASP1/TGFB1/TNFRSF1B/TLR4/EDNRB/PRKCA/CD14/ARID5A/TNFAIP3/CEBPB/CCL5/CXCL6/PYCARD/LTF/CCL2/CXCL1/CXCL2/IL6/ZFP36/SERPINE1/SPON2	28
GO:0031100	animal organ regeneration	12/1151	65/18903	0.000490292	0.00296492	0.00190474	AXL/TGFBR3/RGN/GAS6/TGFBR2/GLI3/CXCL12/CEBPB/CLDN1/IL6/NNMT/NR4A3	12
GO:0003128	heart field specification	6/1151	18/18903	0.000494824	0.00297226	0.00190946	ISL1/SMARCD3/BMP4/MEF2C/ROBO1/DKK1	6
GO:0032354	response to follicle-stimulating hormone	6/1151	18/18903	0.000494824	0.00297226	0.00190946	EDNRA/TGFBR3/SRD5A2/EFNA5/EDN1/CYP1B1	6
GO:0043116	negative regulation of vascular permeability	6/1151	18/18903	0.000494824	0.00297226	0.00190946	FERMT2/ANGPT1/PDE2A/AKAP12/CLDN5/CEACAM1	6
GO:0046851	negative regulation of bone remodeling	6/1151	18/18903	0.000494824	0.00297226	0.00190946	SFRP1/INPP5D/TMEM119/TNFAIP3/IL6/CD38	6
GO:0050665	hydrogen peroxide biosynthetic process	6/1151	18/18903	0.000494824	0.00297226	0.00190946	CYBA/DUOX1/DUOXA1/MAOB/CYBB/SOD2	6
GO:0150079	negative regulation of neuroinflammatory response	6/1151	18/18903	0.000494824	0.00297226	0.00190946	SYT11/CX3CL1/CD200/TNFRSF1B/CST7/PTPRC	6
GO:0051235	maintenance of location	37/1151	342/18903	0.000503885	0.00302331	0.00194225	FGF2/CAV1/FLNA/SLC8A1/ANXA6/JPH2/GSN/GRIK5/PLN/ACACB/CES1/CX3CL1/ATP1A2/JPH4/LTBP1/FBN1/RASA3/SRGN/DMD/GSTM2/CYBA/C3/CASQ2/ANXA1/CCL21/CD4/PTPRC/LDAH/CORO1A/NBL1/CASQ1/ITPR1/S100A9/CCL19/TMSB15A/LCN2/IL6	37
GO:0001516	prostaglandin biosynthetic process	8/1151	32/18903	0.00052135	0.00311074	0.00199842	PTGIS/PTGDS/PTGS1/PLA2G4A/CD74/ANXA1/EDN1/PTGS2	8
GO:0003180	aortic valve morphogenesis	8/1151	32/18903	0.00052135	0.00311074	0.00199842	EMILIN1/SNAI2/BMP4/ROBO1/TGFB1/GATA3/ELN/HEYL	8
GO:0010644	cell communication by electrical coupling	8/1151	32/18903	0.00052135	0.00311074	0.00199842	GJA1/CAV1/SLC8A1/GJC1/ATP1A2/ATP1B2/CASQ2/ATP1B1	8
GO:0035456	response to interferon-beta	8/1151	32/18903	0.00052135	0.00311074	0.00199842	IFI16/STING1/TLR3/IFITM3/IFITM2/PLSCR1/IFITM1/BST2	8
GO:0046457	prostanoid biosynthetic process	8/1151	32/18903	0.00052135	0.00311074	0.00199842	PTGIS/PTGDS/PTGS1/PLA2G4A/CD74/ANXA1/EDN1/PTGS2	8
GO:0003197	endocardial cushion development	10/1151	48/18903	0.000527042	0.00313774	0.00201577	FOXF1/ISL1/TGFBR2/SNAI2/BMP4/DCHS1/ROBO1/ACVRL1/TGFB2/HEYL	10
GO:0010171	body morphogenesis	10/1151	48/18903	0.000527042	0.00313774	0.00201577	MMP2/PHLDB1/CRISPLD2/PDGFRA/TGFB3/RRAS/GPC3/CLDN5/DKK1/COL1A1	10
GO:0002824	positive regulation of adaptive immune response based on somatic recombination of immune receptors built from immunoglobulin superfamily domains	17/1151	114/18903	0.000527685	0.00313809	0.00201599	CD40/MR1/TGFB1/GATA3/IL27RA/HLA-E/C3/PLA2G4A/ARID5A/HLA-DRA/CD4/HLA-DRB1/PTPRC/HLA-F/HLA-A/IL6/AZGP1	17
GO:1903035	negative regulation of response to wounding	15/1151	94/18903	0.000532402	0.00316265	0.00203177	FGF2/SERPING1/C1QTNF1/PRKG1/WFDC1/PDGFRA/ANXA2/CD34/PLAU/THBD/CEACAM1/THBS1/SERPINF2/EDN1/SERPINE1	15
GO:0070252	actin-mediated cell contraction	16/1151	104/18903	0.000535682	0.00317862	0.00204203	GJA1/CAV1/FLNA/PDPN/KCNJ8/FRMD6/ACTA2/GSN/TPM1/PLN/ABCC9/GJC1/ATP1A2/KCNH2/ACTC1/TNNC1	16
GO:0019058	viral life cycle	35/1151	319/18903	0.000546141	0.0032371	0.0020796	CAV2/STOM/CAV1/AXL/APOBEC3C/GSN/IFI16/GAS6/ITGA5/CTSB/LGALS1/APOBEC3G/NCAM1/TRIM22/EPHA2/ITGB6/BCL2/CD74/CH25H/IFITM3/IFITM2/ITGA2/CXCR4/CCL5/SELPLG/CD4/HLA-DRB1/PLSCR1/IFITM1/BST2/LTF/CLDN1/CCL2/MX1/ANPEP	35
GO:0071479	cellular response to ionizing radiation	13/1151	75/18903	0.000547666	0.00324061	0.00208186	IFI16/SFRP1/CCND2/MAP3K20/CRYAB/SNAI2/GATA3/ITGB6/CYBA/RHOB/SFRP2/GADD45A/EGR1	13
GO:0010863	positive regulation of phospholipase C activity	9/1151	40/18903	0.000547939	0.00324061	0.00208186	EDNRA/FGF2/LPAR1/FGFR1/PDGFRB/PDGFRA/KIT/SELE/ANG	9
GO:0044403	biological process involved in symbiotic interaction	34/1151	307/18903	0.000550381	0.00325148	0.00208884	CAV2/STOM/CAV1/AXL/GSN/GAS6/ITGA5/CTSB/LGALS1/CSF1R/NCAM1/TRIM22/APOL1/EPHA2/ITGB6/CD74/CH25H/IFITM3/FN1/HPN/IFITM2/ITGA2/CXCR4/CCL5/SELPLG/CD4/HLA-DRB1/PLSCR1/IFITM1/CXCL6/LTF/CLDN1/FASN/ANPEP	34
GO:0001911	negative regulation of leukocyte mediated cytotoxicity	7/1151	25/18903	0.000554686	0.00326614	0.00209826	SERPINB9/HLA-E/IL7R/PTPRC/CEACAM1/HLA-F/HLA-A	7
GO:0032331	negative regulation of chondrocyte differentiation	7/1151	25/18903	0.000554686	0.00326614	0.00209826	EFEMP1/RARB/RARG/GLI3/SNAI2/BMP4/LTBP3	7
GO:0086064	cell communication by electrical coupling involved in cardiac conduction	7/1151	25/18903	0.000554686	0.00326614	0.00209826	GJA1/CAV1/SLC8A1/GJC1/ATP1A2/ATP1B2/ATP1B1	7
GO:0045071	negative regulation of viral genome replication	11/1151	57/18903	0.000563038	0.00330229	0.00212148	APOBEC3C/IFI16/APOBEC3G/IFITM3/IFITM2/CCL5/PLSCR1/IFITM1/BST2/LTF/MX1	11
GO:0061756	leukocyte adhesion to vascular endothelial cell	11/1151	57/18903	0.000563038	0.00330229	0.00212148	JAM2/SELP/CHST2/ETS1/CXCL12/VCAM1/CCL21/SELPLG/ITGB2/SELE/IL6	11
GO:0090175	regulation of establishment of planar polarity	11/1151	57/18903	0.000563038	0.00330229	0.00212148	PRICKLE2/FZD7/ROR2/DACT1/SFRP1/RSPO3/SFRP2/PLEKHA4/GPC3/DKK1/VANGL2	11
GO:0007189	adenylate cyclase-activating G protein-coupled receptor signaling pathway	21/1151	157/18903	0.000563281	0.00330229	0.00212148	ATP2B4/ADCY5/GNAL/LPAR1/PTGER2/PLN/GPR161/ADCY3/GNG2/PDE4A/MRAP2/S1PR1/ADGRL4/ADRA1D/S1PR3/PRKCA/ADGRL2/CALCRL/RAMP3/ADRA2C/CHGA	21
GO:0060675	ureteric bud morphogenesis	12/1151	66/18903	0.000566569	0.00331795	0.00213154	FGF2/TCF21/EYA1/GLI3/BMP4/HOXD11/DCHS1/ILK/PBX1/GATA3/BCL2/GPC3	12
GO:0001938	positive regulation of endothelial cell proliferation	17/1151	115/18903	0.000584804	0.00341358	0.00219297	CAV2/FGF2/FGFR1/NRP2/BMP4/ECM1/ACVRL1/FGF7/CYBA/KDR/PRKCA/CXCL12/PROK1/JCAD/IGF2/ANG/EGR3	17
GO:0042303	molting cycle	17/1151	115/18903	0.000584804	0.00341358	0.00219297	FST/LDB2/FGFR2/NGFR/TP63/FGF7/TGFB2/BCL2/IGFBP5/CDH3/DKK1/FERMT1/FOXQ1/KRT17/KRT14/PER1/PTGS2	17
GO:0042633	hair cycle	17/1151	115/18903	0.000584804	0.00341358	0.00219297	FST/LDB2/FGFR2/NGFR/TP63/FGF7/TGFB2/BCL2/IGFBP5/CDH3/DKK1/FERMT1/FOXQ1/KRT17/KRT14/PER1/PTGS2	17
GO:0098773	skin epidermis development	15/1151	95/18903	0.000597307	0.00348278	0.00223743	FST/LDB2/FGFR2/NGFR/TP63/FGF7/TGFB2/BCL2/IGFBP5/CDH3/DLL1/DKK1/FERMT1/FOXQ1/KRT17	15
GO:0106106	cold-induced thermogenesis	20/1151	147/18903	0.000605629	0.00351985	0.00226125	GJA1/CAV1/PDGFC/GATM/ZNF516/ZNF423/LAMA4/LEPR/EPAS1/MFAP2/PLCL1/TLR4/ID1/G0S2/DIO2/CXCR4/CEBPB/ALPL/LCN2/ALDH1A1	20
GO:0120161	regulation of cold-induced thermogenesis	20/1151	147/18903	0.000605629	0.00351985	0.00226125	GJA1/CAV1/PDGFC/GATM/ZNF516/ZNF423/LAMA4/LEPR/EPAS1/MFAP2/PLCL1/TLR4/ID1/G0S2/DIO2/CXCR4/CEBPB/ALPL/LCN2/ALDH1A1	20
GO:1903038	negative regulation of leukocyte cell-cell adhesion	20/1151	147/18903	0.000605629	0.00351985	0.00226125	PRNP/PDE5A/VSIR/GLI3/BMP4/FGL2/LGALS3/RUNX1/CD74/ANXA1/CXCL12/VTCN1/CCL21/LRRC32/CEBPB/LAPTM5/HLA-DRB1/CEACAM1/GPNMB/SCGB1A1	20
GO:0045926	negative regulation of growth	29/1151	249/18903	0.000611447	0.00354983	0.0022805	GJA1/DACT3/RERG/FHL1/WFDC1/SFRP1/TGFBR2/CRYAB/NTN1/BMP4/ACVRL1/TGFB1/SPART/TGFB2/BCL2/SFRP2/IGFBP5/GPC3/FRZB/BST2/SCGB3A1/PI16/MT1A/SEMA3C/MT1X/MT1M/MT1E/MT1G/ALOX15B	29
GO:0045685	regulation of glial cell differentiation	13/1151	76/18903	0.000624482	0.00361769	0.0023241	IL33/DAAM2/IL34/ID4/TGFB1/TNFRSF1B/IL6ST/CXCR4/PTN/ID2/IL6/EGR2/DLX1	13
GO:0048332	mesoderm morphogenesis	13/1151	76/18903	0.000624482	0.00361769	0.0023241	GJA1/FOXF1/FOXC1/EYA1/BMP4/ITGB4/FGFR2/ITGA8/EPHA2/ITGA3/SFRP2/ITGA2/DKK1	13
GO:0009615	response to virus	42/1151	409/18903	0.000646999	0.0037441	0.00240531	KCNJ8/ACTA2/APOBEC3C/IL33/ABCC9/CD40/CLU/IFI16/STING1/NLRP1/HTRA1/CASP1/APOBEC3G/TRIM22/FGL2/TLR3/GBP1/GATA3/ITGB6/BCL2/CD207/RNASE6/ITGB8/IFITM3/CXCL12/IFITM2/TNFAIP3/CXCR4/CCL5/PLSCR1/BIRC3/IFITM1/PYCARD/BST2/PENK/PTPRC/CCL19/MX1/HSPB1/DDIT4/IL6/SPON2	42
GO:0002063	chondrocyte development	8/1151	33/18903	0.000651839	0.00376013	0.00241561	SULF2/TGFBR2/RARG/CHST11/ECM1/SULF1/COL27A1/SFRP2	8
GO:0050901	leukocyte tethering or rolling	8/1151	33/18903	0.000651839	0.00376013	0.00241561	JAM2/SELP/CHST2/CXCL12/VCAM1/CCL21/SELPLG/SELE	8
GO:0016485	protein processing	29/1151	250/18903	0.000652484	0.00376013	0.00241561	SPON1/PRNP/MMP14/GSN/VSIR/IFI16/C1R/GLI3/GAS1/ADAM19/CASP1/SRGN/CPXM1/ANXA2/RUNX1/PLAU/THBD/CTSS/HPN/CPA3/CPXM2/CLEC3B/PYCARD/CST7/THBS1/SERPINF2/CPM/SERPINE1/MME	29
GO:0072171	mesonephric tubule morphogenesis	12/1151	67/18903	0.000652567	0.00376013	0.00241561	FGF2/TCF21/EYA1/GLI3/BMP4/HOXD11/DCHS1/ILK/PBX1/GATA3/BCL2/GPC3	12
GO:1901890	positive regulation of cell junction assembly	16/1151	106/18903	0.000664139	0.00380898	0.00244699	CAV1/FERMT2/NLGN3/SFRP1/COL16A1/EFNA5/FLRT3/EPHA2/KDR/SLITRK6/HOPX/CLDN5/AMIGO2/MYOC/CLDN1/THBS2	16
GO:0002691	regulation of cellular extravasation	9/1151	41/18903	0.000664587	0.00380898	0.00244699	PDGFD/JAM3/SELP/CHST2/IL27RA/CXCL12/CCL21/PLVAP/SELE	9
GO:0010719	negative regulation of epithelial to mesenchymal transition	9/1151	41/18903	0.000664587	0.00380898	0.00244699	DACT3/SFRP1/SPRED1/SPRY2/SPRY1/GATA3/TGFB2/SFRP2/HPN	9
GO:0014912	negative regulation of smooth muscle cell migration	9/1151	41/18903	0.000664587	0.00380898	0.00244699	MYOCD/TPM1/PRKG1/MEF2C/IGFBP5/AIF1/LRP1/IGFBP3/SERPINE1	9
GO:0150077	regulation of neuroinflammatory response	9/1151	41/18903	0.000664587	0.00380898	0.00244699	SYT11/IL33/CX3CL1/CD200/TNFRSF1B/CST7/PTPRC/PTGS2/IL6	9
GO:0001738	morphogenesis of a polarized epithelium	15/1151	96/18903	0.000668832	0.00382923	0.00246	PRICKLE2/FZD7/FOXF1/MSN/ROR2/DACT1/SFRP1/RSPO3/TP63/SFRP2/PLEKHA4/GPC3/FOXF2/DKK1/VANGL2	15
GO:0002483	antigen processing and presentation of endogenous peptide antigen	6/1151	19/18903	0.000686168	0.00391596	0.00251572	HLA-E/HLA-DRA/HLA-DRB1/HLA-F/HLA-A/AZGP1	6
GO:0032930	positive regulation of superoxide anion generation	6/1151	19/18903	0.000686168	0.00391596	0.00251572	GSTP1/TGFB1/CYBA/ITGB2/TYROBP/CD177	6
GO:0051797	regulation of hair follicle development	6/1151	19/18903	0.000686168	0.00391596	0.00251572	FST/NGFR/TGFB2/CDH3/FERMT1/KRT17	6
GO:1901653	cellular response to peptide	39/1151	373/18903	0.000703789	0.00400642	0.00257383	CAV2/EDNRA/GJA1/CAV1/SORBS1/PRNP/DDR2/RAB31/ANO1/SLC2A4/ARHGEF2/PRKCB/VIM/RARRES2/FOXO1/FBN1/MAP1B/NGFR/ZFP36L1/KANK1/CYBA/PDK4/TLR4/SCNN1A/ID1/PIK3R1/VCAM1/PID1/KLF2/LRP1/SOCS3/IRS1/IGF2/CEACAM1/EDN1/SCNN1G/FOS/NR4A3/CYP1B1	39
GO:0010771	negative regulation of cell morphogenesis involved in differentiation	5/1151	13/18903	0.000707234	0.00400642	0.00257383	FBLN1/CORO1C/EFNA5/GBP1/KANK1	5
GO:0031272	regulation of pseudopodium assembly	5/1151	13/18903	0.000707234	0.00400642	0.00257383	CDC42EP3/CDC42EP4/KIT/CCL21/CDC42EP5	5
GO:0031274	positive regulation of pseudopodium assembly	5/1151	13/18903	0.000707234	0.00400642	0.00257383	CDC42EP3/CDC42EP4/KIT/CCL21/CDC42EP5	5
GO:0051918	negative regulation of fibrinolysis	5/1151	13/18903	0.000707234	0.00400642	0.00257383	PLAU/THBD/THBS1/SERPINF2/SERPINE1	5
GO:0070486	leukocyte aggregation	5/1151	13/18903	0.000707234	0.00400642	0.00257383	JAM2/MSN/RAC2/S100A9/NR4A3	5
GO:1900025	negative regulation of substrate adhesion-dependent cell spreading	5/1151	13/18903	0.000707234	0.00400642	0.00257383	FBLN1/CORO1C/EFNA5/GBP1/KANK1	5
GO:0071887	leukocyte apoptotic process	17/1151	117/18903	0.000715106	0.0040376	0.00259386	AXL/GAS6/PLEKHO2/GLI3/BMP4/MEF2C/LGALS3/BCL2/CD74/ANXA1/HCLS1/CXCL12/CCL21/IL7R/CCL5/CCL19/IL6	17
GO:0006929	substrate-dependent cell migration	7/1151	26/18903	0.000719499	0.0040376	0.00259386	CSPG4/NTN1/SNAI2/ROBO1/FN1/ITGA2/PTPRC	7
GO:0010882	regulation of cardiac muscle contraction by calcium ion signaling	7/1151	26/18903	0.000719499	0.0040376	0.00259386	SLC8A1/PLN/ATP1A2/DMD/GSTM2/CASQ2/ATP1B1	7
GO:0019883	antigen processing and presentation of endogenous antigen	7/1151	26/18903	0.000719499	0.0040376	0.00259386	HLA-E/CD74/HLA-DRA/HLA-DRB1/HLA-F/HLA-A/AZGP1	7
GO:0060343	trabecula formation	7/1151	26/18903	0.000719499	0.0040376	0.00259386	TGFBR3/FHL2/MMP2/SFRP1/SLC40A1/ADAMTS1/COL1A1	7
GO:0060384	innervation	7/1151	26/18903	0.000719499	0.0040376	0.00259386	EDNRA/ISL1/SULF2/SULF1/SLITRK6/VCAM1/EDN1	7
GO:0060669	embryonic placenta morphogenesis	7/1151	26/18903	0.000719499	0.0040376	0.00259386	RSPO3/FGFR2/ZFP36L1/GJB5/SOCS3/IGF2/CCN1	7
GO:0062009	secondary palate development	7/1151	26/18903	0.000719499	0.0040376	0.00259386	TGFBR3/TGFBR2/ITGB6/TGFB3/TGFB2/ITGB8/LRRC32	7
GO:0072010	glomerular epithelium development	7/1151	26/18903	0.000719499	0.0040376	0.00259386	EDNRA/FOXC1/BMP4/CD34/PECAM1/EDNRB/LAMB2	7
GO:0120254	olefinic compound metabolic process	21/1151	160/18903	0.000724622	0.00405788	0.00260689	PTGIS/DKK3/SRD5A2/GSTP1/ALDH1A2/AKR1B1/PTGDS/GSTM2/PTGS1/PLA2G4A/EDNRB/CACNA1H/CYP3A5/MGLL/PTGS2/EGR1/GSTA1/ALDH1A1/CYP1B1/HSD17B6/ALOX15B	21
GO:1990845	adaptive thermogenesis	21/1151	160/18903	0.000724622	0.00405788	0.00260689	GJA1/CAV1/PDGFC/GATM/ZNF516/ZNF423/LAMA4/LEPR/EPAS1/MFAP2/PLCL1/TLR4/TRPV4/ID1/G0S2/DIO2/CXCR4/CEBPB/ALPL/LCN2/ALDH1A1	21
GO:0001910	regulation of leukocyte mediated cytotoxicity	14/1151	87/18903	0.000740078	0.00414012	0.00265973	MR1/SERPINB9/HLA-E/HLA-DRA/KLRB1/IL7R/HLA-DRB1/CXCL6/PTPRC/CEACAM1/TYROBP/HLA-F/HLA-A/AZGP1	14
GO:0007548	sex differentiation	32/1151	288/18903	0.000746515	0.00417179	0.00268007	AXL/MMP14/FOXC1/ROR2/MMP2/TCF21/SRD5A2/HOXD13/SFRP1/SOX15/LHFPL2/FST/GFRA1/PDGFRB/PDGFRA/TLR3/TP63/PBX1/A2M/GATA3/KIT/TGFB2/BCL2/SFRP2/KDR/CNTFR/CEBPB/FOXF2/ADAMTS1/SDC1/ANG/CYP1B1	32
GO:0060193	positive regulation of lipase activity	12/1151	68/18903	0.000749235	0.00418265	0.00268704	EDNRA/FGF2/LPAR1/FGFR1/PDGFRB/PDGFRA/FGFR2/KIT/CCL5/CCN1/SELE/ANG	12
GO:0050868	negative regulation of T cell activation	18/1151	128/18903	0.000751222	0.00418939	0.00269137	PRNP/PDE5A/VSIR/GLI3/BMP4/FGL2/LGALS3/RUNX1/CD74/ANXA1/VTCN1/LRRC32/CEBPB/LAPTM5/HLA-DRB1/CEACAM1/GPNMB/SCGB1A1	18
GO:1990778	protein localization to cell periphery	36/1151	337/18903	0.000752238	0.00419071	0.00269222	EHD2/ATP2B4/CAV1/FLNA/CLIP3/SORBS1/PRNP/MMP14/RAB31/SEC23A/GAS6/EPHA3/EPB41L2/NFASC/RAB38/DCHS1/MYADM/RAB34/STAC/MRAP2/OPTN/TGFB1/TAMALIN/GBP1/VAMP5/LGALS3/EPHA2/ITGA3/MAL/STAC2/ATP1B1/PIK3R1/PID1/LRP1/RAMP3/MISP	36
GO:0010574	regulation of vascular endothelial growth factor production	11/1151	59/18903	0.000764021	0.00424754	0.00272873	ISL1/SULF2/NDRG2/TGFB1/SULF1/C3/IL6ST/CXCL17/PTGS2/IL6/CYP1B1	11
GO:0042306	regulation of protein import into nucleus	11/1151	59/18903	0.000764021	0.00424754	0.00272873	FLNA/ANGPT1/GLI3/BMP4/MDFIC/TGFB1/PKIG/HCLS1/PIK3R1/FERMT1/PTGS2	11
GO:0007219	Notch signaling pathway	23/1151	183/18903	0.000766466	0.00425673	0.00273464	MMP14/FOXC1/ZNF423/PLN/CNTN1/NEURL1B/TGFBR2/SNAI2/ROBO1/MAML2/TP63/KIT/TGFB2/S1PR3/IL6ST/DLK2/DLL1/HEYL/CFD/POSTN/TIMP4/KRT19/DLX1	23
GO:0071241	cellular response to inorganic substance	27/1151	229/18903	0.000768374	0.00426293	0.00273862	SERPINF1/PRNP/SYT11/NFATC4/CLIC4/RASGRP2/FOXO1/AQP1/MEF2C/SLC40A1/CACNA1H/ALOX5AP/CYBB/CLDN1/EDN1/MT1A/PTGS2/MT1X/KCNK3/CPNE7/FOS/AOC1/MT1M/JUNB/MT1E/FOSB/MT1G	27
GO:0006631	fatty acid metabolic process	41/1151	400/18903	0.000773486	0.00428687	0.002754	CAV1/PTGIS/RGN/ACSL4/ACACB/CES1/GSTP1/GSTM4/CYGB/ACOX2/FABP3/AKR1B1/PTGDS/ACSF2/CYP4B1/PAM/GSTM2/PTGS1/BDH2/GGT5/C3/PDK4/PLA2G4A/CD74/FMO2/ANXA1/ALOX5AP/IRS1/MGLL/SCD5/CEACAM1/EDN1/PTGS2/FASN/NUDT8/GSTA1/NR4A3/CYP1B1/AMACR/ACSM1/ALOX15B	41
GO:1900274	regulation of phospholipase C activity	9/1151	42/18903	0.000800739	0.00443334	0.00284809	EDNRA/FGF2/LPAR1/FGFR1/PDGFRB/PDGFRA/KIT/SELE/ANG	9
GO:0003382	epithelial cell morphogenesis	8/1151	34/18903	0.000807427	0.00445203	0.0028601	PALLD/FRMD6/MET/CLIC4/COL18A1/COL15A1/HEG1/ARHGEF26	8
GO:0036336	dendritic cell migration	8/1151	34/18903	0.000807427	0.00445203	0.0028601	ASB2/ANO6/GAS6/GPR183/CCL21/CXCR4/CCL5/CCL19	8
GO:0090322	regulation of superoxide metabolic process	8/1151	34/18903	0.000807427	0.00445203	0.0028601	GSTP1/FBLN5/TGFB1/CYBA/ITGB2/TYROBP/CD177/ACP5	8
GO:1905207	regulation of cardiocyte differentiation	8/1151	34/18903	0.000807427	0.00445203	0.0028601	FZD7/MYOCD/BMP4/MEF2C/TGFB1/TGFB2/DLL1/DKK1	8
GO:0045109	intermediate filament organization	12/1151	69/18903	0.000857585	0.00471409	0.00302845	DES/VIM/KRT23/KRT5/KRT15/KRT7/KRT17/KRT4/KRT14/KRT13/KRT19/NEFH	12
GO:0061180	mammary gland epithelium development	12/1151	69/18903	0.000857585	0.00471409	0.00302845	FGF2/FOXF1/CSF1/NTN1/ROBO1/FGFR2/CSF1R/GATA3/EPHA2/NR3C1/CEBPB/ID2	12
GO:2000401	regulation of lymphocyte migration	12/1151	69/18903	0.000857585	0.00471409	0.00302845	JAM2/MSN/ECM1/CD200/IL27RA/CXCL12/CCL21/AIF1/CCL5/PYCARD/CORO1A/CCL2	12
GO:0050767	regulation of neurogenesis	39/1151	377/18903	0.000862755	0.00473766	0.0030436	FGF2/SERPINF1/IL33/DAAM2/CX3CL1/RND2/NFATC4/EFNA5/SMARCD3/NTN1/GLI3/MAP1B/IL34/ROBO1/ID4/PLXND1/TGFB1/ANXA2/TNFRSF1B/KIT/SPART/DIXDC1/IL6ST/ID1/CXCL12/FN1/DLL1/CRABP2/CXCR4/HEYL/PTN/ID2/SEMA3C/IL6/EGR2/BHLHE40/TGM2/DLX1/MME	39
GO:0001913	T cell mediated cytotoxicity	10/1151	51/18903	0.000872252	0.00478492	0.00307396	MR1/HLA-E/HLA-DRA/IL7R/HLA-DRB1/PTPRC/CEACAM1/HLA-F/HLA-A/AZGP1	10
GO:0001658	branching involved in ureteric bud morphogenesis	11/1151	60/18903	0.0008849	0.0048395	0.00310902	FGF2/TCF21/EYA1/GLI3/BMP4/HOXD11/DCHS1/ILK/PBX1/BCL2/GPC3	11
GO:0002711	positive regulation of T cell mediated immunity	11/1151	60/18903	0.0008849	0.0048395	0.00310902	MR1/GATA3/HLA-E/ARID5A/HLA-DRA/HLA-DRB1/PTPRC/HLA-F/HLA-A/IL6/AZGP1	11
GO:0046686	response to cadmium ion	11/1151	60/18903	0.0008849	0.0048395	0.00310902	PRNP/HAAO/KIT/CYBB/SOD2/MT1A/MT1X/FOS/MT1M/MT1E/MT1G	11
GO:0002407	dendritic cell chemotaxis	7/1151	27/18903	0.000920771	0.00501019	0.00321868	ANO6/GAS6/GPR183/CCL21/CXCR4/CCL5/CCL19	7
GO:0003401	axis elongation	7/1151	27/18903	0.000920771	0.00501019	0.00321868	HOXD13/SFRP1/BMP4/FGFR2/SPRY2/SPRY1/SFRP2	7
GO:0036296	response to increased oxygen levels	7/1151	27/18903	0.000920771	0.00501019	0.00321868	CAV1/PDPN/MMP2/PDGFRB/FOXO1/COL1A1/SOD2	7
GO:0042730	fibrinolysis	7/1151	27/18903	0.000920771	0.00501019	0.00321868	SERPING1/ANXA2/PLAU/THBD/THBS1/SERPINF2/SERPINE1	7
GO:2000647	negative regulation of stem cell proliferation	7/1151	27/18903	0.000920771	0.00501019	0.00321868	FGF2/FBLN1/RARB/RARG/GLI3/SNAI2/FERMT1	7
GO:0046328	regulation of JNK cascade	19/1151	141/18903	0.000922759	0.00501593	0.00322236	FZD7/DACT1/GSTP1/SFRP1/SIRPA/MDFIC/TLR3/CCN2/DIXDC1/SFRP2/TLR4/TRPV4/GADD45A/CCL21/PYCARD/SERPINF2/PER1/CCL19/GADD45B	19
GO:0032755	positive regulation of interleukin-6 production	15/1151	99/18903	0.000928613	0.00503946	0.00323748	ISL1/IL33/RAB7B/ARHGEF2/TLR3/CYBA/TLR4/CD74/TRPV4/ARID5A/AIF1/PYCARD/TYROBP/IL6/SPON2	15
GO:0007043	cell-cell junction assembly	20/1151	152/18903	0.000928962	0.00503946	0.00323748	GJA1/CAV1/VCL/CLDN11/GJC1/CNTNAP1/SNAI2/TLN1/DCHS1/JAM3/EPHA2/CDH11/PECAM1/TRPV4/PRKCA/HEG1/HOPX/CLDN5/CLDN1/CLDN7	20
GO:2001257	regulation of cation channel activity	24/1151	197/18903	0.000929993	0.00503996	0.00323781	EDNRA/STOM/CAV1/JPH2/PLN/ABCC9/NLGN3/JPH4/MEF2C/KCNAB1/DMD/STAC/GEM/GSTM2/STAC2/CASQ2/CTSS/AHNAK/RRAD/CCL2/EDN1/CASQ1/KCNK3/CACNG4	24
GO:0045687	positive regulation of glial cell differentiation	9/1151	43/18903	0.000958743	0.00518474	0.00333082	IL33/IL34/TGFB1/TNFRSF1B/IL6ST/CXCR4/PTN/ID2/EGR2	9
GO:0071548	response to dexamethasone	9/1151	43/18903	0.000958743	0.00518474	0.00333082	SERPINF1/AQP1/FBXO32/FIBIN/NR3C1/CLDN1/EDN1/DDIT4/CYP1B1	9
GO:0009266	response to temperature stimulus	23/1151	186/18903	0.000959602	0.00518474	0.00333082	ZNF516/HSPB6/ANO1/DNAJB4/CRYAB/IGFBP7/FOXO1/STAC/NGFR/CD34/IER5/TRPV4/DIO2/CXCL12/CD14/CXCR4/LXN/THBS1/SOD2/CASQ1/PTGS2/HSPB1/FOS	23
GO:0002719	negative regulation of cytokine production involved in immune response	8/1151	35/18903	0.000991485	0.00535163	0.00343803	AXL/ANGPT1/TGFB1/TGFB3/TGFB2/BST2/HLA-F/ACP5	8
GO:0051258	protein polymerization	31/1151	281/18903	0.0010072	0.00543098	0.003489	LMOD1/CLIP3/KIRREL1/GSN/CDC42EP3/SVIL/DAAM2/GAS7/MET/FHOD3/FAM107A/FCHSD2/MYADM/MAP1B/CDC42EP4/TMOD1/ELN/CAPG/KANK1/CASQ2/TRPV4/HCLS1/KRT5/CCL21/AIF1/PYCARD/CORO1A/CASQ1/TMSB15A/ANG/CDC42EP5	31
GO:0030865	cortical cytoskeleton organization	11/1151	61/18903	0.00102118	0.00549384	0.00352939	EHD2/RND3/RND2/EPB41L2/FHOD3/TLN1/CAVIN3/RHOB/TRPV4/RAC2/RAC3	11
GO:0006636	unsaturated fatty acid biosynthetic process	10/1151	52/18903	0.00102192	0.00549384	0.00352939	PTGIS/PTGDS/PTGS1/PLA2G4A/CD74/ANXA1/SCD5/EDN1/PTGS2/ALOX15B	10
GO:0010043	response to zinc ion	10/1151	52/18903	0.00102192	0.00549384	0.00352939	HAAO/PAM/VCAM1/SOD2/MT1A/MT1X/KCNK3/MT1M/MT1E/MT1G	10
GO:0072028	nephron morphogenesis	13/1151	80/18903	0.00102884	0.00552551	0.00354973	FGF2/TCF21/EYA1/GLI3/BMP4/PDGFRB/HOXD11/DCHS1/ILK/PBX1/GATA3/BCL2/GPC3	13
GO:0048469	cell maturation	23/1151	187/18903	0.0010327	0.00554071	0.0035595	EDNRA/AXL/NPR2/CX3CL1/AKR1B1/EPAS1/GATA3/NTN4/BCL2/C3/KDR/EDNRB/CCL21/CFTR/KLF2/C1QA/DEFB1/TFCP2L1/RAC3/MYOC/EDN1/CCL19/ANG	23
GO:0060191	regulation of lipase activity	14/1151	90/18903	0.0010439	0.00555801	0.00357061	EDNRA/FGF2/LPAR1/FGFR1/PDGFRB/PDGFRA/FGFR2/KIT/ANXA1/LRP1/CCL5/CCN1/SELE/ANG	14
GO:2000177	regulation of neural precursor cell proliferation	14/1151	90/18903	0.0010439	0.00555801	0.00357061	FGF2/NES/SLC16A2/CX3CL1/LIMS2/SMARCD3/GLI3/FOXO1/ID4/ILK/CEND1/PTN/BTG2/ID2	14
GO:0016322	neuron remodeling	5/1151	14/18903	0.00104523	0.00555801	0.00357061	EDNRA/CX3CL1/NTN4/C3/C1QA	5
GO:0042117	monocyte activation	5/1151	14/18903	0.00104523	0.00555801	0.00357061	CSF1/DYSF/FN1/MT1G/NPY	5
GO:0047484	regulation of response to osmotic stress	5/1151	14/18903	0.00104523	0.00555801	0.00357061	ARHGEF2/EFHD1/ABCB1/TRPV4/PTGS2	5
GO:1902043	positive regulation of extrinsic apoptotic signaling pathway via death domain receptors	5/1151	14/18903	0.00104523	0.00555801	0.00357061	SFRP1/TIMP3/MAL/THBS1/ATF3	5
GO:1904044	response to aldosterone	5/1151	14/18903	0.00104523	0.00555801	0.00357061	CYBA/SCNN1A/CYBB/SGK1/SCNN1G	5
GO:1904321	response to forskolin	5/1151	14/18903	0.00104523	0.00555801	0.00357061	ADCY5/ADCY3/EFNA5/AHR/CFTR	5
GO:1904322	cellular response to forskolin	5/1151	14/18903	0.00104523	0.00555801	0.00357061	ADCY5/ADCY3/EFNA5/AHR/CFTR	5
GO:0045165	cell fate commitment	31/1151	282/18903	0.00106741	0.00567037	0.00364279	EDNRA/FGF2/FZD7/PDPN/PRRX1/TGFB1I1/ISL1/MITF/LMO4/SFRP1/EYA1/ARHGEF2/GLI3/GAS1/BMP4/ETS2/HOXD10/MEF2C/EPAS1/FGFR2/SPRY2/GATA3/BCL2/SFRP2/KDR/DLL1/DKK1/EDN1/ID2/IL6/DLX1	31
GO:0006956	complement activation	18/1151	132/18903	0.00108183	0.0057413	0.00368836	SERPING1/CFH/C1S/CLU/C1R/MASP1/C7/MFAP4/CFI/A2M/C3/RGCC/C1QA/C1QC/C1QB/CFD/CFB/IGLL5	18
GO:0001676	long-chain fatty acid metabolic process	16/1151	111/18903	0.00110514	0.00585342	0.00376039	PTGIS/ACSL4/GSTP1/GSTM4/PTGDS/ACSF2/PAM/GSTM2/PTGS1/PLA2G4A/MGLL/PTGS2/GSTA1/CYP1B1/ACSM1/ALOX15B	16
GO:0031532	actin cytoskeleton reorganization	16/1151	111/18903	0.00110514	0.00585342	0.00376039	FLNA/SYDE1/ASB2/GSN/PDGFRA/ANTXR1/CSF1R/FGF7/KIT/S1PR1/EFS/PDLIM4/TRPV4/ANXA1/HCLS1/GMFG	16
GO:0010975	regulation of neuron projection development	44/1151	446/18903	0.00111079	0.00587759	0.00377592	FLNA/SERPINF1/DPYSL3/PMP22/PRRX1/LPAR1/CNTN1/ROR2/CX3CL1/NCS1/RND2/NR2F1/FEZ1/EPHA3/SFRP1/ATP1B2/NFATC4/EFNA5/NTN1/VIM/MAP1B/ROBO1/NDNF/PLXND1/GATA3/UST/ITM2C/SPART/KANK1/ITGA3/DIXDC1/SFRP2/TRPV4/ID1/CXCL12/FN1/CRABP2/DKK1/PTN/SDC2/MBOAT1/S100A9/SEMA3C/CD38	44
GO:0045214	sarcomere organization	9/1151	44/18903	0.00114111	0.00602022	0.00386755	FLNC/TPM1/CFL2/CSRP1/LDB3/FHOD3/EDN1/CASQ1/KRT19	9
GO:0071526	semaphorin-plexin signaling pathway	9/1151	44/18903	0.00114111	0.00602022	0.00386755	EDNRA/FLNA/MET/NRP2/NCAM1/PLXND1/KDR/EDN1/SEMA3C	9
GO:1904706	negative regulation of vascular associated smooth muscle cell proliferation	9/1151	44/18903	0.00114111	0.00602022	0.00386755	EFEMP2/MYOCD/TPM1/PRKG1/CNN1/MEF2C/NDRG2/TGFB3/SOD2	9
GO:1905477	positive regulation of protein localization to membrane	15/1151	101/18903	0.00114549	0.00603738	0.00387857	ATP2B4/STOM/CLIP3/SORBS1/PRNP/EPHA3/STAC/LGALS3/EPHA2/ITGA3/STAC2/PIK3R1/LRP1/ITGB2/RAMP3	15
GO:0006972	hyperosmotic response	7/1151	28/18903	0.00116387	0.00609161	0.00391341	ARHGEF2/EFHD1/AKR1B1/AQP1/TLR3/TRPV4/CLDN1	7
GO:0030194	positive regulation of blood coagulation	7/1151	28/18903	0.00116387	0.00609161	0.00391341	EMILIN1/ANO6/PLAU/THBD/THBS1/SERPINF2/SERPINE1	7
GO:0031342	negative regulation of cell killing	7/1151	28/18903	0.00116387	0.00609161	0.00391341	SERPINB9/HLA-E/IL7R/PTPRC/CEACAM1/HLA-F/HLA-A	7
GO:0042634	regulation of hair cycle	7/1151	28/18903	0.00116387	0.00609161	0.00391341	FST/NGFR/TGFB2/CDH3/FERMT1/KRT17/PER1	7
GO:0090382	phagosome maturation	7/1151	28/18903	0.00116387	0.00609161	0.00391341	SYT11/RAB31/RAB7B/RAB38/SRPX/RAB34/CORO1A	7
GO:1900048	positive regulation of hemostasis	7/1151	28/18903	0.00116387	0.00609161	0.00391341	EMILIN1/ANO6/PLAU/THBD/THBS1/SERPINF2/SERPINE1	7
GO:0001942	hair follicle development	14/1151	91/18903	0.00116597	0.00609161	0.00391341	FST/LDB2/FGFR2/NGFR/TP63/FGF7/TGFB2/BCL2/IGFBP5/CDH3/DKK1/FERMT1/FOXQ1/KRT17	14
GO:0048525	negative regulation of viral process	14/1151	91/18903	0.00116597	0.00609161	0.00391341	APOBEC3C/GSN/IFI16/APOBEC3G/CH25H/IFITM3/IFITM2/CCL5/PLSCR1/IFITM1/BST2/LTF/MX1/ZFP36	14
GO:0060021	roof of mouth development	14/1151	91/18903	0.00116597	0.00609161	0.00391341	TGFBR3/PRRX1/TCF21/TGFBR2/GLI3/SNAI2/PDGFRA/ITGB6/TGFB3/TGFB2/ITGB8/LRRC32/CLDN5/FOXF2	14
GO:0043030	regulation of macrophage activation	11/1151	62/18903	0.00117432	0.00612926	0.0039376	SYT11/IL33/CX3CL1/CD200/PLA2G4A/TLR4/CD74/CST7/PTPRC/THBS1/IL6	11
GO:0001569	branching involved in blood vessel morphogenesis	8/1151	36/18903	0.00120762	0.00628477	0.0040375	EDNRA/TGFBR2/NFATC4/PLXND1/COL4A1/SFRP2/KDR/EDN1	8
GO:0035909	aorta morphogenesis	8/1151	36/18903	0.00120762	0.00628477	0.0040375	MYLK/EFEMP2/EYA1/PDGFRB/ACVRL1/TGFB2/COL3A1/LRP1	8
GO:0060323	head morphogenesis	8/1151	36/18903	0.00120762	0.00628477	0.0040375	MMP2/CRISPLD2/PDGFRA/TGFB3/RRAS/CLDN5/DKK1/COL1A1	8
GO:0060411	cardiac septum morphogenesis	12/1151	72/18903	0.00126376	0.00657058	0.00422111	TGFBR3/ISL1/TGFBR2/NRP2/BMP4/ROBO1/FGFR2/TGFB2/HEYL/CCN1/FGFRL1/SEMA3C	12
GO:0031341	regulation of cell killing	15/1151	102/18903	0.001269	0.00658506	0.00423042	CFH/MR1/SERPINB9/HLA-E/HLA-DRA/KLRB1/IL7R/HLA-DRB1/CXCL6/PTPRC/CEACAM1/TYROBP/HLA-F/HLA-A/AZGP1	15
GO:1901019	regulation of calcium ion transmembrane transporter activity	15/1151	102/18903	0.001269	0.00658506	0.00423042	JPH2/RGN/PLN/ATP1A2/JPH4/DMD/STAC/GEM/GSTM2/STAC2/CASQ2/ATP1B1/AHNAK/RRAD/CASQ1	15
GO:0030048	actin filament-based movement	18/1151	134/18903	0.00128906	0.00668275	0.00429318	GJA1/CAV1/FLNA/PDPN/KCNJ8/FRMD6/ACTA2/GSN/TPM1/PLN/ABCC9/GJC1/ATP1A2/WIPF1/WIPF3/KCNH2/ACTC1/TNNC1	18
GO:0002456	T cell mediated immunity	16/1151	113/18903	0.00134054	0.00694291	0.00446031	MR1/RFTN1/GATA3/TNFRSF1B/HLA-E/AHR/ARID5A/HLA-DRA/IL7R/HLA-DRB1/PTPRC/CEACAM1/HLA-F/HLA-A/IL6/AZGP1	16
GO:0010573	vascular endothelial growth factor production	11/1151	63/18903	0.00134586	0.00695706	0.0044694	ISL1/SULF2/NDRG2/TGFB1/SULF1/C3/IL6ST/CXCL17/PTGS2/IL6/CYP1B1	11
GO:0019731	antibacterial humoral response	11/1151	63/18903	0.00134586	0.00695706	0.0044694	WFDC2/HLA-E/RNASE6/DEFB1/LTF/JCHAIN/HLA-A/ANG/PI3/SPON2/PGC	11
GO:0042551	neuron maturation	9/1151	45/18903	0.0013505	0.00697435	0.00448051	EDNRA/CX3CL1/NTN4/BCL2/C3/EDNRB/C1QA/RAC3/MYOC	9
GO:0048639	positive regulation of developmental growth	21/1151	168/18903	0.0013631	0.00703266	0.00451797	FGF2/TGFBR3/ACACB/CSF1/RND2/TGFBR2/SOX15/EFNA5/NTN1/MEF2C/MAP1B/FGFR2/BCL2/HOPX/CXCL12/FN1/DLL1/CRABP2/CXCR4/IGF2/EDN1	21
GO:0014009	glial cell proliferation	10/1151	54/18903	0.00138438	0.00712204	0.00457539	IL33/CX3CL1/CLU/CSF1/LEPR/NTN1/IL34/CSF1R/PENK/IL6	10
GO:0032330	regulation of chondrocyte differentiation	10/1151	54/18903	0.00138438	0.00712204	0.00457539	EFEMP1/RARB/RARG/GLI3/SNAI2/BMP4/ACVRL1/CCN2/LOXL2/LTBP3	10
GO:0046660	female sex differentiation	17/1151	124/18903	0.0013844	0.00712204	0.00457539	AXL/MMP14/FOXC1/MMP2/SRD5A2/SFRP1/LHFPL2/FST/PDGFRA/TP63/A2M/KIT/BCL2/KDR/CEBPB/ADAMTS1/ANG	17
GO:0019233	sensory perception of pain	15/1151	103/18903	0.00140351	0.00721343	0.0046341	IL33/ANO1/AQP1/NDN/EDNRB/CXCL12/ITGA2/CXCR4/LXN/PENK/MGLL/CCL2/EDN1/PTGS2/MME	15
GO:0046635	positive regulation of alpha-beta T cell activation	12/1151	73/18903	0.00143019	0.00733655	0.00471319	TGFBR2/GLI3/HLA-E/RUNX1/ANXA1/HLA-DRA/CD3E/HLA-DRB1/PTPRC/IL2RG/CCL19/HLA-A	12
GO:1904888	cranial skeletal system development	12/1151	73/18903	0.00143019	0.00733655	0.00471319	EDNRA/PRRX1/MMP14/TGFBR2/GLI3/CHST11/BMP4/PDGFRA/FGFR2/TP63/TGFB3/TGFB2	12
GO:0070301	cellular response to hydrogen peroxide	14/1151	93/18903	0.00144619	0.00739777	0.00475252	AXL/DDR2/MET/PDGFD/SIRPA/AQP1/RHOB/ANXA1/TNFAIP3/KLF2/EDN1/IL6/NR4A3/CYP1B1	14
GO:2000106	regulation of leukocyte apoptotic process	14/1151	93/18903	0.00144619	0.00739777	0.00475252	AXL/GAS6/BMP4/MEF2C/LGALS3/BCL2/CD74/ANXA1/HCLS1/CXCL12/CCL21/IL7R/CCL5/CCL19	14
GO:0001958	endochondral ossification	7/1151	29/18903	0.00145451	0.00739777	0.00475252	MMP14/FOXC1/BMP4/MEF2C/TMEM119/COL1A1/ALPL	7
GO:0010955	negative regulation of protein processing	7/1151	29/18903	0.00145451	0.00739777	0.00475252	PRNP/GAS1/PLAU/CST7/THBS1/SERPINF2/SERPINE1	7
GO:0034698	response to gonadotropin	7/1151	29/18903	0.00145451	0.00739777	0.00475252	EDNRA/TGFBR3/SRD5A2/EFNA5/ITGA3/EDN1/CYP1B1	7
GO:0036075	replacement ossification	7/1151	29/18903	0.00145451	0.00739777	0.00475252	MMP14/FOXC1/BMP4/MEF2C/TMEM119/COL1A1/ALPL	7
GO:0060037	pharyngeal system development	7/1151	29/18903	0.00145451	0.00739777	0.00475252	EDNRA/ISL1/EYA1/BMP4/GATA3/TGFB2/EDN1	7
GO:1902547	regulation of cellular response to vascular endothelial growth factor stimulus	7/1151	29/18903	0.00145451	0.00739777	0.00475252	ATP2B4/ADGRA2/DCN/ROBO1/SPRY2/DLL1/JCAD	7
GO:1903318	negative regulation of protein maturation	7/1151	29/18903	0.00145451	0.00739777	0.00475252	PRNP/GAS1/PLAU/CST7/THBS1/SERPINF2/SERPINE1	7
GO:0055013	cardiac muscle cell development	13/1151	83/18903	0.00145903	0.00741	0.00476038	SLC8A1/ASB2/MYH11/FHL2/ISL1/SGCB/FHOD3/BMP4/PDGFRB/PDGFRA/ACTC1/PI16/EDN1	13
GO:0034110	regulation of homotypic cell-cell adhesion	8/1151	37/18903	0.00145967	0.00741	0.00476038	PDPN/C1QTNF1/PRKG1/IL6ST/PRKCA/CCL5/CEACAM1/IL6	8
GO:0010273	detoxification of copper ion	5/1151	15/18903	0.00148971	0.00750581	0.00482193	MT1A/MT1X/MT1M/MT1E/MT1G	5
GO:0048934	peripheral nervous system neuron differentiation	5/1151	15/18903	0.00148971	0.00750581	0.00482193	ISL1/HOXD10/RUNX1/HOXD9/NEFH	5
GO:0048935	peripheral nervous system neuron development	5/1151	15/18903	0.00148971	0.00750581	0.00482193	ISL1/HOXD10/RUNX1/HOXD9/NEFH	5
GO:0070831	basement membrane assembly	5/1151	15/18903	0.00148971	0.00750581	0.00482193	PHLDB1/LAMB3/NTN4/LAMB1/LAMB2	5
GO:1990169	stress response to copper ion	5/1151	15/18903	0.00148971	0.00750581	0.00482193	MT1A/MT1X/MT1M/MT1E/MT1G	5
GO:2000052	positive regulation of non-canonical Wnt signaling pathway	5/1151	15/18903	0.00148971	0.00750581	0.00482193	SFRP1/RSPO3/PLEKHA4/GPC3/DKK1	5
GO:2000345	regulation of hepatocyte proliferation	5/1151	15/18903	0.00148971	0.00750581	0.00482193	LIMS2/HPN/TNFAIP3/PTN/CEACAM1	5
GO:2001028	positive regulation of endothelial cell chemotaxis	5/1151	15/18903	0.00148971	0.00750581	0.00482193	FGF2/FGFR1/MET/KDR/HSPB1	5
GO:0051051	negative regulation of transport	46/1151	479/18903	0.0015063	0.00758225	0.00487104	GJA1/CAV1/FOXF1/ANGPT1/SYT11/PLN/ATP1A2/EPHA3/SFRP1/GPM6B/CRYAB/CNN2/KCNH2/PRKCB/FOXO1/SIRPA/DYSF/MAP1B/MDFIC/KCNAB1/GEM/CD200/GSTM2/ANXA2/TNFRSF1B/PKIG/LGALS3/BCL2/CD74/CASQ2/ANXA1/MAOB/GABRE/PID1/IRS1/PLSCR1/RRAD/CEACAM1/CORO1A/THBS1/FERMT1/HLA-F/ADRA2C/EDN1/PTGS2/CHGA	46
GO:0019730	antimicrobial humoral response	17/1151	125/18903	0.00151353	0.00761156	0.00488987	RARRES2/WFDC2/HLA-E/RNASE6/CXCL6/DEFB1/LTF/JCHAIN/CXCL1/S100A9/HLA-A/CXCL2/ANG/LYZ/PI3/SPON2/PGC	17
GO:0051592	response to calcium ion	19/1151	147/18903	0.00152429	0.00765847	0.00492	CAV1/KCNMB1/SYT11/KCNMA1/S100A16/CLIC4/RASGRP2/MEF2C/CASQ2/ALOX5AP/PENK/THBS1/EDN1/SDC1/AQP3/CPNE7/FOS/JUNB/FOSB	19
GO:0006469	negative regulation of protein kinase activity	25/1151	216/18903	0.00153449	0.00770252	0.0049483	CAV1/SLC8A1/MYOCD/RGN/CORO1C/GSTP1/SFRP1/WWTR1/SPRED1/BMP4/SPRY2/SPRY1/PKIG/MVP/SFRP2/GADD45A/HEG1/TNFAIP3/PYCARD/PTPRC/CEACAM1/DUSP1/PTPRT/HSPB1/GADD45B	25
GO:0098657	import into cell	28/1151	252/18903	0.00154868	0.0077665	0.00498941	ATP2B4/KCNJ8/SLC8A1/PRNP/SLC12A4/SLC16A2/ABCC9/NEURL1B/ATP1A2/GPM6B/ATP1B2/FABP3/KCNH2/P2RX1/SCNN1A/TRPV4/SLC29A1/ATP1B1/SLC2A5/FOLR2/RAMP3/CYBRD1/THBS1/SLC7A3/SLC2A3/SLC15A2/SCNN1G/SLC22A3	28
GO:0033673	negative regulation of kinase activity	27/1151	240/18903	0.00155244	0.00777813	0.00499688	CAV1/SLC8A1/DDR2/MYOCD/RGN/CORO1C/GSTP1/SFRP1/WWTR1/SPRED1/BMP4/AJUBA/SPRY2/SPRY1/PKIG/MVP/SFRP2/GADD45A/HEG1/TNFAIP3/PYCARD/PTPRC/CEACAM1/DUSP1/PTPRT/HSPB1/GADD45B	27
GO:0048701	embryonic cranial skeleton morphogenesis	9/1151	46/18903	0.00158975	0.00795022	0.00510743	PRRX1/MMP14/TGFBR2/GLI3/CHST11/BMP4/PDGFRA/FGFR2/TGFB3	9
GO:1901861	regulation of muscle tissue development	9/1151	46/18903	0.00158975	0.00795022	0.00510743	JPH2/SOX15/BMP4/MEF2C/TGFB1/BCL2/IGFBP5/DLL1/IGF2	9
GO:0002686	negative regulation of leukocyte migration	10/1151	55/18903	0.00160131	0.00795212	0.00510865	EMILIN1/IL33/CNN2/CD200/IL27RA/CXCL12/CCL21/CCL2/NBL1/DUSP1	10
GO:0043616	keratinocyte proliferation	10/1151	55/18903	0.00160131	0.00795212	0.00510865	ZEB1/FST/SNAI2/FGFR2/TP63/FGF7/ZFP36L1/CDH3/FERMT1/ZFP36	10
GO:0055078	sodium ion homeostasis	10/1151	55/18903	0.00160131	0.00795212	0.00510865	EDNRA/SLC8A1/ATP1A2/ATP1B2/SCN7A/EDNRB/SCNN1A/ATP1B1/EDN1/SCNN1G	10
GO:2000648	positive regulation of stem cell proliferation	10/1151	55/18903	0.00160131	0.00795212	0.00510865	FGF2/GJA1/FERMT2/PRRX1/ID4/TP63/PBX1/LTBP3/KDR/PTPRC	10
GO:0022404	molting cycle process	14/1151	94/18903	0.0016061	0.00795212	0.00510865	FST/LDB2/FGFR2/NGFR/TP63/FGF7/TGFB2/BCL2/IGFBP5/CDH3/DKK1/FERMT1/FOXQ1/KRT17	14
GO:0022405	hair cycle process	14/1151	94/18903	0.0016061	0.00795212	0.00510865	FST/LDB2/FGFR2/NGFR/TP63/FGF7/TGFB2/BCL2/IGFBP5/CDH3/DKK1/FERMT1/FOXQ1/KRT17	14
GO:0048704	embryonic skeletal system morphogenesis	14/1151	94/18903	0.0016061	0.00795212	0.00510865	PRRX1/MMP14/ZEB1/TGFBR2/EYA1/GLI3/CHST11/BMP4/HOXD10/PDGFRA/FGFR2/TGFB3/HOXB2/HOXD9	14
GO:0006883	cellular sodium ion homeostasis	6/1151	22/18903	0.00161232	0.00795212	0.00510865	SLC8A1/ATP1A2/ATP1B2/SCNN1A/ATP1B1/SCNN1G	6
GO:0010881	regulation of cardiac muscle contraction by regulation of the release of sequestered calcium ion	6/1151	22/18903	0.00161232	0.00795212	0.00510865	SLC8A1/PLN/ATP1A2/DMD/GSTM2/CASQ2	6
GO:0034104	negative regulation of tissue remodeling	6/1151	22/18903	0.00161232	0.00795212	0.00510865	SFRP1/INPP5D/TMEM119/TNFAIP3/IL6/CD38	6
GO:0035313	wound healing, spreading of epidermal cells	6/1151	22/18903	0.00161232	0.00795212	0.00510865	FERMT2/ITGA5/AJUBA/COL5A1/ACVRL1/FERMT1	6
GO:0035584	calcium-mediated signaling using intracellular calcium source	6/1151	22/18903	0.00161232	0.00795212	0.00510865	PRNP/SELP/KDR/VCAM1/DEFB1/PTPRC	6
GO:0045061	thymic T cell selection	6/1151	22/18903	0.00161232	0.00795212	0.00510865	GLI3/GATA3/CD74/CD3E/PTPRC/CD3D	6
GO:0060713	labyrinthine layer morphogenesis	6/1151	22/18903	0.00161232	0.00795212	0.00510865	RSPO3/FGFR2/ZFP36L1/GJB5/SOCS3/CCN1	6
GO:0072111	cell proliferation involved in kidney development	6/1151	22/18903	0.00161232	0.00795212	0.00510865	PDGFD/BMP4/PDGFRB/GATA3/GPC3/EGR1	6
GO:0050766	positive regulation of phagocytosis	12/1151	74/18903	0.00161429	0.00795457	0.00511023	RAB31/ANO6/GAS6/MFGE8/SIRPA/CYBA/C3/ITGA2/PYCARD/PTPRC/CCL2/IL2RG	12
GO:0033559	unsaturated fatty acid metabolic process	16/1151	115/18903	0.00161684	0.00795982	0.0051136	PTGIS/GSTP1/AKR1B1/PTGDS/GSTM2/PTGS1/PLA2G4A/CD74/ANXA1/MGLL/SCD5/EDN1/PTGS2/GSTA1/CYP1B1/ALOX15B	16
GO:0048592	eye morphogenesis	20/1151	159/18903	0.00162358	0.00798571	0.00513023	MEIS1/FGF2/EFEMP1/ZEB1/RARB/RARG/COL8A2/GLI3/BMP4/FBN1/AQP1/COL5A1/MFAP2/EPHA2/BCL2/KDR/DLL1/FOXF2/COL8A1/COL5A2	20
GO:0031346	positive regulation of cell projection organization	36/1151	352/18903	0.00163166	0.00801812	0.00515105	FLNA/SERPINF1/DPYSL3/CDC42EP3/CNTN1/ROR2/CX3CL1/CORO1C/RND2/FEZ1/EPHA3/ATP1B2/EFNA5/KCTD17/NTN1/MAP1B/ROBO1/CDC42EP4/NDNF/PLXND1/KIT/TGFB3/ITGA3/DIXDC1/PIK3R1/CXCL12/FN1/ENPP2/CCL21/ITGA2/CRABP2/RAC2/PTN/S100A9/CCL19/CDC42EP5	36
GO:0042445	hormone metabolic process	27/1151	241/18903	0.00164967	0.0080992	0.00520314	DKK3/SLC16A2/SRD5A2/ALDH1A2/CTSB/AKR1B1/PDGFRA/CTSK/RBP1/GATA3/DUOX1/DUOXA1/EDNRB/NR3C1/CACNA1H/DIO2/CPQ/HPN/CPA3/CRABP2/CYP3A5/SELENOM/EGR1/ALDH1A1/CYP1B1/MME/HSD17B6	27
GO:1905330	regulation of morphogenesis of an epithelium	11/1151	65/18903	0.00175074	0.00857662	0.00550985	FGF2/GJA1/HOXD13/SFRP1/SNAI2/BMP4/FGF7/GATA3/MMRN2/NTN4/SULF1	11
GO:0003203	endocardial cushion morphogenesis	8/1151	38/18903	0.0017517	0.00857662	0.00550985	ISL1/TGFBR2/SNAI2/DCHS1/ROBO1/ACVRL1/TGFB2/HEYL	8
GO:0048009	insulin-like growth factor receptor signaling pathway	8/1151	38/18903	0.0017517	0.00857662	0.00550985	IGFBP4/IGFBP6/CRIM1/IGFBP5/PIK3R1/CDH3/IRS1/IGFBP3	8
GO:0071466	cellular response to xenobiotic stimulus	22/1151	183/18903	0.00176541	0.0086359	0.00554793	PRNP/AOX1/GAS6/GSTP1/GSTM4/KCNH2/PDE4A/MEF2C/ABCB1/TLR3/GSTM2/GSTM3/FMO2/AHR/ABCC3/CXCR4/CYP3A5/CD69/EDN1/GSTA1/CYP1B1/ACSM1	22
GO:0002065	columnar/cuboidal epithelial cell differentiation	16/1151	116/18903	0.00177199	0.00866019	0.00556353	FGF2/CAV1/RARB/RARG/FST/BMP4/MAP1B/FGFR2/TP63/IL6ST/KLF5/DLL1/CEBPB/FASN/SERPINE1/NPY	16
GO:0045638	negative regulation of myeloid cell differentiation	14/1151	95/18903	0.00178046	0.0086937	0.00558506	MEIS1/MEIS2/SFRP1/INPP5D/FBN1/TLR3/ZFP36L1/TLR4/PIK3R1/DLL1/C1QC/CEACAM1/LTF/ZFP36	14
GO:0061351	neural precursor cell proliferation	19/1151	149/18903	0.00178743	0.00871982	0.00560184	FGF2/NES/SLC16A2/CX3CL1/LIMS2/SMARCD3/ARHGEF2/GLI3/FOXO1/HHIP/FGFR2/ID4/ILK/CEND1/DIXDC1/TRNP1/PTN/BTG2/ID2	19
GO:0010464	regulation of mesenchymal cell proliferation	7/1151	30/18903	0.00179876	0.00874333	0.00561695	PRRX1/FOXF1/ZEB1/TGFBR2/BMP4/FGFR2/KDR	7
GO:0050820	positive regulation of coagulation	7/1151	30/18903	0.00179876	0.00874333	0.00561695	EMILIN1/ANO6/PLAU/THBD/THBS1/SERPINF2/SERPINE1	7
GO:0090330	regulation of platelet aggregation	7/1151	30/18903	0.00179876	0.00874333	0.00561695	PDPN/C1QTNF1/PRKG1/IL6ST/PRKCA/CEACAM1/IL6	7
GO:1902230	negative regulation of intrinsic apoptotic signaling pathway in response to DNA damage	7/1151	30/18903	0.00179876	0.00874333	0.00561695	CLU/SNAI2/BCL2/SFRP2/CD74/CXCL12/ACKR3	7
GO:0072078	nephron tubule morphogenesis	12/1151	75/18903	0.00181746	0.00882626	0.00567022	FGF2/TCF21/EYA1/GLI3/BMP4/HOXD11/DCHS1/ILK/PBX1/GATA3/BCL2/GPC3	12
GO:0008625	extrinsic apoptotic signaling pathway via death domain receptors	13/1151	85/18903	0.0018215	0.00883791	0.00567771	SFRP1/FAIM2/ARHGEF2/TIMP3/LGALS3/BCL2/SFRP2/MAL/PIK3R1/TNFAIP3/THBS1/SERPINE1/ATF3	13
GO:0007254	JNK cascade	21/1151	172/18903	0.00183197	0.00888069	0.00570519	FZD7/DACT1/GSTP1/SFRP1/MAP3K20/SIRPA/MDFIC/TLR3/CCN2/DIXDC1/SFRP2/TLR4/TRPV4/GADD45A/CCL21/PYCARD/SERPINF2/PER1/CCL19/CDC42EP5/GADD45B	21
GO:0002701	negative regulation of production of molecular mediator of immune response	9/1151	47/18903	0.00186182	0.00901726	0.00579293	AXL/ANGPT1/IL33/TGFB1/TGFB3/TGFB2/BST2/HLA-F/ACP5	9
GO:0060389	pathway-restricted SMAD protein phosphorylation	11/1151	66/18903	0.00198757	0.00961761	0.00617861	RBPMS/EMILIN1/TGFBR3/TGFBR2/BMP4/ACVRL1/TGFB1/TGFB3/TGFB2/LRP1/DKK1	11
GO:0002088	lens development in camera-type eye	13/1151	86/18903	0.00202886	0.00979978	0.00629563	MEIS1/FGF2/TGFBR2/CRYAB/VIM/SPRED1/BMP4/SPRY2/SPRY1/TMOD1/GATA3/EPHA2/SLITRK6	13
GO:0019935	cyclic-nucleotide-mediated signaling	13/1151	86/18903	0.00202886	0.00979978	0.00629563	IRAG1/LPAR1/NPR2/PRKG1/CAP2/PDE2A/AQP1/RASD2/EDNRB/AHR/DEFB1/THBS1/OR51E2	13
GO:0001937	negative regulation of endothelial cell proliferation	12/1151	76/18903	0.00204114	0.00985026	0.00632807	CAV2/CAV1/MEF2C/NGFR/ACVRL1/MMRN2/SULF1/SPARC/ATOH8/RGCC/THBS1/CCL2	12
GO:0010715	regulation of extracellular matrix disassembly	5/1151	16/18903	0.00205905	0.00987464	0.00634373	PDPN/DDR2/TGFB1/LRP1/IL6	5
GO:0021783	preganglionic parasympathetic fiber development	5/1151	16/18903	0.00205905	0.00987464	0.00634373	NAV2/NRP2/HOXB2/ACKR3/EGR2	5
GO:0031269	pseudopodium assembly	5/1151	16/18903	0.00205905	0.00987464	0.00634373	CDC42EP3/CDC42EP4/KIT/CCL21/CDC42EP5	5
GO:0034349	glial cell apoptotic process	5/1151	16/18903	0.00205905	0.00987464	0.00634373	GAS6/PRKCA/AKAP12/DLL1/CCL2	5
GO:0045779	negative regulation of bone resorption	5/1151	16/18903	0.00205905	0.00987464	0.00634373	INPP5D/TMEM119/TNFAIP3/IL6/CD38	5
GO:0051014	actin filament severing	5/1151	16/18903	0.00205905	0.00987464	0.00634373	GSN/SVIL/CFL2/CAPG/GMFG	5
GO:1901201	regulation of extracellular matrix assembly	5/1151	16/18903	0.00205905	0.00987464	0.00634373	EMILIN1/PHLDB1/ANTXR1/TGFB1/RGCC	5
GO:0002027	regulation of heart rate	15/1151	107/18903	0.0020671	0.00989557	0.00635717	EDNRA/CAV1/SLC8A1/ISL1/TPM1/PLN/POPDC2/KCNH2/EPAS1/DMD/ADRA1D/EDNRB/CASQ2/EDN3/EDN1	15
GO:0002444	myeloid leukocyte mediated immunity	15/1151	107/18903	0.0020671	0.00989557	0.00635717	FOXF1/PTGDS/SERPINB9/KIT/HLA-E/C3/ITGB2/RAC2/CXCL6/TYROBP/IL6/CD177/NR4A3/SPON2/CHGA	15
GO:2000178	negative regulation of neural precursor cell proliferation	6/1151	23/18903	0.00207023	0.00989989	0.00635995	SLC16A2/LIMS2/ILK/CEND1/PTN/BTG2	6
GO:0006898	receptor-mediated endocytosis	28/1151	257/18903	0.00207169	0.00989989	0.00635995	CAV2/CAV1/ANGPT1/RAB31/CLU/NLGN3/PDLIM7/TGFBR2/FCHSD2/ANXA2/STAB1/C3/CD14/CCL21/DLL1/CALCRL/HSPG2/LRP1/ITGB2/DKK1/ACKR3/RAMP3/CEACAM1/SDC1/CCL19/SELE/SERPINE1/CACNG4	28
GO:0043583	ear development	25/1151	221/18903	0.00210599	0.0100549	0.00645951	EDNRA/FGF2/PRRX1/ZEB1/EYA1/NTN1/GLI3/BMP4/PDGFRB/DCHS1/CYTL1/FGFR2/SPRY2/ITGA8/GATA3/TGFB3/TGFB2/BCL2/SLITRK6/HPN/DLL1/FRZB/EDN1/CEBPD/KCNK3	25
GO:0050879	multicellular organismal movement	10/1151	57/18903	0.00211774	0.0100655	0.00646633	SYNM/MAP1A/DMD/STAC/GSTM2/STAC2/DMPK/CASQ1/ITPR1/TNNC1	10
GO:0050881	musculoskeletal movement	10/1151	57/18903	0.00211774	0.0100655	0.00646633	SYNM/MAP1A/DMD/STAC/GSTM2/STAC2/DMPK/CASQ1/ITPR1/TNNC1	10
GO:0030900	forebrain development	38/1151	383/18903	0.00211809	0.0100655	0.00646633	ATP2B4/FGF2/AXL/SLC8A1/BMERB1/LPAR1/ISL1/ZEB1/SRD5A2/PRKG1/RARB/FEZ1/ATP1A2/ALDH1A2/ATP1B2/GLI3/NRP2/BMP4/AQP1/ROBO1/TACC1/FGFR2/CSF1R/ID4/NDNF/DIXDC1/COL3A1/CXCL12/LAMB1/CXCR4/DKK1/RAC3/TYROBP/BTG2/ID2/SSTR1/DLX1/NPY	38
GO:0002705	positive regulation of leukocyte mediated immunity	18/1151	140/18903	0.00212361	0.0100655	0.00646633	CD40/MR1/TGFB1/GATA3/KIT/HLA-E/C3/ARID5A/HLA-DRA/ITGB2/HLA-DRB1/PTPRC/TYROBP/HLA-F/HLA-A/IL6/CD177/AZGP1	18
GO:0001765	membrane raft assembly	4/1151	10/18903	0.00213442	0.0100655	0.00646633	CAV2/CAV1/RFTN1/ANXA2	4
GO:0003253	cardiac neural crest cell migration involved in outflow tract morphogenesis	4/1151	10/18903	0.00213442	0.0100655	0.00646633	EDNRA/BMP4/EDN1/SEMA3C	4
GO:0003418	growth plate cartilage chondrocyte differentiation	4/1151	10/18903	0.00213442	0.0100655	0.00646633	ANXA6/TGFBR2/RARG/COL27A1	4
GO:0010572	positive regulation of platelet activation	4/1151	10/18903	0.00213442	0.0100655	0.00646633	FLNA/SELP/PLA2G4A/TLR4	4
GO:0035860	glial cell-derived neurotrophic factor receptor signaling pathway	4/1151	10/18903	0.00213442	0.0100655	0.00646633	SULF2/GFRA1/GATA3/SULF1	4
GO:0048865	stem cell fate commitment	4/1151	10/18903	0.00213442	0.0100655	0.00646633	EDNRA/SFRP1/SFRP2/EDN1	4
GO:0060525	prostate glandular acinus development	4/1151	10/18903	0.00213442	0.0100655	0.00646633	HOXD13/SFRP1/FGFR2/TP63	4
GO:0061626	pharyngeal arch artery morphogenesis	4/1151	10/18903	0.00213442	0.0100655	0.00646633	EDNRA/BMP4/TGFB2/EDN1	4
GO:0070294	renal sodium ion absorption	4/1151	10/18903	0.00213442	0.0100655	0.00646633	EDNRA/EDNRB/EDN1/SGK1	4
GO:1901203	positive regulation of extracellular matrix assembly	4/1151	10/18903	0.00213442	0.0100655	0.00646633	EMILIN1/PHLDB1/TGFB1/RGCC	4
GO:0051928	positive regulation of calcium ion transport	17/1151	129/18903	0.00213632	0.0100656	0.0064664	CAV1/MYLK/JPH2/RGN/CX3CL1/PDGFRB/STAC/P2RX1/GSTM2/LGALS3/STAC2/ATP1B1/CXCL12/CCL5/RAMP3/CCL2/CASQ1	17
GO:0002673	regulation of acute inflammatory response	9/1151	48/18903	0.00216985	0.0102057	0.00655641	GSTP1/HLA-E/C3/EDNRB/IL6ST/ALOX5AP/PTGS2/IL6/NPY	9
GO:0035850	epithelial cell differentiation involved in kidney development	9/1151	48/18903	0.00216985	0.0102057	0.00655641	EDNRA/ACTA2/WWTR1/BMP4/MEF2C/GATA3/CD34/EDNRB/LAMB2	9
GO:0006942	regulation of striated muscle contraction	14/1151	97/18903	0.0021765	0.0102191	0.00656501	CAV1/SLC8A1/PDE5A/PLN/ATP1A2/DMD/GSTM2/CCN2/CASQ2/TRPV4/ATP1B1/DMPK/CASQ1/CHGA	14
GO:0060993	kidney morphogenesis	14/1151	97/18903	0.0021765	0.0102191	0.00656501	FGF2/TCF21/WWTR1/EYA1/GLI3/BMP4/PDGFRB/HOXD11/DCHS1/ILK/PBX1/GATA3/BCL2/GPC3	14
GO:0010880	regulation of release of sequestered calcium ion into cytosol by sarcoplasmic reticulum	7/1151	31/18903	0.00220299	0.0103074	0.00662177	SLC8A1/PLN/ATP1A2/DMD/GSTM2/CASQ2/CASQ1	7
GO:0017145	stem cell division	7/1151	31/18903	0.00220299	0.0103074	0.00662177	FZD7/WWTR1/KIT/ZFP36L2/TGFB2/SFRP2/EVI2B	7
GO:0035767	endothelial cell chemotaxis	7/1151	31/18903	0.00220299	0.0103074	0.00662177	FGF2/FGFR1/MET/KDR/THBS1/HSPB1/EGR3	7
GO:0150117	positive regulation of cell-substrate junction organization	7/1151	31/18903	0.00220299	0.0103074	0.00662177	FERMT2/SFRP1/COL16A1/MAPRE2/KDR/PIK3R1/MYOC	7
GO:0043254	regulation of protein-containing complex assembly	40/1151	410/18903	0.00223259	0.0104369	0.00670492	FERMT2/LMOD1/CLIP3/ISL1/KIRREL1/GSN/CDC42EP3/SVIL/DAAM2/MSN/CLU/LMO4/DACT1/MET/CRYAB/FHOD3/FCHSD2/MYADM/MAP1B/JAM3/CDC42EP4/AJUBA/SELP/TMOD1/FBLIM1/TGFB1/LGALS3/ELN/CAPG/KANK1/TLR4/HCLS1/CCL21/DKK1/PYCARD/CORO1A/FERMT1/TMSB15A/CLDN7/CDC42EP5	40
GO:0030888	regulation of B cell proliferation	11/1151	67/18903	0.0022498	0.0105082	0.00675074	CD40/INPP5D/MEF2C/BCL2/TLR4/CD74/AHR/GPR183/PTPRC/TYROBP/CD38	11
GO:0001892	embryonic placenta development	13/1151	87/18903	0.00225527	0.0105155	0.0067554	PLCD3/SOX15/RSPO3/EPAS1/FGFR2/ZFP36L1/GJB5/CEBPB/SOCS3/IGF2/CCN1/KRT19/JUNB	13
GO:0050672	negative regulation of lymphocyte proliferation	13/1151	87/18903	0.00225527	0.0105155	0.0067554	PRNP/PDE5A/VSIR/INPP5D/BMP4/RASSF5/VTCN1/LRRC32/CEBPB/HLA-DRB1/TYROBP/GPNMB/SCGB1A1	13
GO:0032526	response to retinoic acid	15/1151	108/18903	0.00226856	0.0105591	0.00678347	FZD7/SERPINF1/MMP2/EPHA3/ALDH1A2/RARG/PDGFRB/IGFBP7/AQP1/FGFR2/GJB3/DKK1/COL1A1/AQP3/CD38	15
GO:0044106	cellular amine metabolic process	15/1151	108/18903	0.00226856	0.0105591	0.00678347	EDNRA/ATP2B4/HAAO/ATCAY/EPAS1/MOXD1/GATA3/TGFB2/MAOB/ITGB2/ALDH2/NNMT/SLC22A3/AOC1/NPY	15
GO:0032729	positive regulation of interferon-gamma production	12/1151	77/18903	0.00228686	0.0106259	0.00682635	ISL1/TLR3/IL27RA/HLA-DPB1/TLR4/HLA-DPA1/CD14/ARID5A/CD3E/PYCARD/CD2/HLA-A	12
GO:0072088	nephron epithelium morphogenesis	12/1151	77/18903	0.00228686	0.0106259	0.00682635	FGF2/TCF21/EYA1/GLI3/BMP4/HOXD11/DCHS1/ILK/PBX1/GATA3/BCL2/GPC3	12
GO:0006633	fatty acid biosynthetic process	20/1151	164/18903	0.0023553	0.0109345	0.00702459	PTGIS/RGN/ACACB/GSTP1/GSTM4/PTGDS/GSTM2/PTGS1/PDK4/PLA2G4A/CD74/ANXA1/MGLL/SCD5/CEACAM1/EDN1/PTGS2/FASN/ACSM1/ALOX15B	20
GO:0120162	positive regulation of cold-induced thermogenesis	14/1151	98/18903	0.00240026	0.0111336	0.0071525	GJA1/CAV1/PDGFC/GATM/ZNF516/LEPR/EPAS1/MFAP2/G0S2/DIO2/CXCR4/CEBPB/ALPL/LCN2	14
GO:0048010	vascular endothelial growth factor receptor signaling pathway	10/1151	58/18903	0.00242202	0.0112248	0.00721112	AXL/EMILIN1/FOXC1/ITGA5/PRKCB/MMRN2/SULF1/KDR/CLEC14A/HSPB1	10
GO:0001953	negative regulation of cell-matrix adhesion	8/1151	40/18903	0.00247299	0.0114315	0.00734388	MMP14/CORO1C/FAM107A/ACVRL1/PIK3R1/THBS1/MYOC/SERPINE1	8
GO:0045823	positive regulation of heart contraction	8/1151	40/18903	0.00247299	0.0114315	0.00734388	TPM1/ATP1A2/CCN2/TGFB2/ADRA1D/EDN3/EDN1/CHGA	8
GO:1904994	regulation of leukocyte adhesion to vascular endothelial cell	8/1151	40/18903	0.00247299	0.0114315	0.00734388	SELP/CHST2/ETS1/CXCL12/CCL21/ITGB2/SELE/IL6	8
GO:0072659	protein localization to plasma membrane	30/1151	285/18903	0.00248792	0.0114906	0.00738187	EHD2/ATP2B4/FLNA/CLIP3/SORBS1/PRNP/MMP14/RAB31/SEC23A/GAS6/EPHA3/NFASC/DCHS1/RAB34/STAC/MRAP2/OPTN/TGFB1/TAMALIN/GBP1/VAMP5/LGALS3/EPHA2/ITGA3/STAC2/ATP1B1/PIK3R1/PID1/LRP1/RAMP3	30
GO:0032945	negative regulation of mononuclear cell proliferation	13/1151	88/18903	0.00250202	0.0115359	0.00741096	PRNP/PDE5A/VSIR/INPP5D/BMP4/RASSF5/VTCN1/LRRC32/CEBPB/HLA-DRB1/TYROBP/GPNMB/SCGB1A1	13
GO:0035023	regulation of Rho protein signal transduction	13/1151	88/18903	0.00250202	0.0115359	0.00741096	KANK2/LPAR1/ARHGEF25/STARD8/MET/ARHGEF2/PDGFRB/ROBO1/KANK1/ITGA3/COL3A1/HEG1/MYOC	13
GO:0002831	regulation of response to biotic stimulus	36/1151	361/18903	0.00250825	0.0115547	0.00742306	EMILIN1/SYT11/SERPING1/CFH/CX3CL1/IFI16/STING1/MR1/HTRA1/SERPINB9/APOBEC3G/FGL2/OPTN/A2M/MMRN2/HLA-E/CYBA/TLR4/AHR/PRKCA/CD14/TNFAIP3/KLRB1/CCL5/HLA-DRB1/PLSCR1/BIRC3/CXCL6/PYCARD/CEACAM1/TYROBP/HLA-F/LTF/COCH/HLA-A/PGC	36
GO:0043114	regulation of vascular permeability	9/1151	49/18903	0.00251709	0.0115657	0.00743012	FERMT2/ANGPT1/PDE2A/TGFB1/TRPV4/AKAP12/CLDN5/CEACAM1/PLVAP	9
GO:0070509	calcium ion import	9/1151	49/18903	0.00251709	0.0115657	0.00743012	TRPC4/SLC8A1/PLN/PDGFRB/LGALS3/TRPV4/CACNA1H/CXCL12/CCL2	9
GO:2000404	regulation of T cell migration	9/1151	49/18903	0.00251709	0.0115657	0.00743012	ECM1/CD200/IL27RA/CXCL12/CCL21/AIF1/CCL5/PYCARD/CORO1A	9
GO:2001233	regulation of apoptotic signaling pathway	37/1151	374/18903	0.00252622	0.0115977	0.00745069	CAV1/FGFR1/CX3CL1/CLU/GSTP1/SFRP1/NFATC4/FAIM2/EYA1/ARHGEF2/SNAI2/BMP4/SRPX/TIMP3/NGFR/TP63/UNC5B/LGALS3/ITM2C/BCL2/SFRP2/MAL/CD74/G0S2/CXCL12/TNFAIP3/ACKR3/PYCARD/PTPRC/THBS1/SOD2/S100A9/PTGS2/HSPB1/TNFRSF12A/SERPINE1/ATF3	37
GO:0051494	negative regulation of cytoskeleton organization	20/1151	165/18903	0.00253085	0.0116091	0.00745798	LMOD1/CLIP3/BMERB1/GSN/SVIL/MET/FHOD3/ARHGEF2/MYADM/MAP1B/TMOD1/S1PR1/CAPG/KANK1/PIK3R1/GMFG/CORO1A/MYOC/RHPN1/TMSB15A	20
GO:0043550	regulation of lipid kinase activity	11/1151	68/18903	0.00253938	0.0116383	0.00747675	FGF2/TNFAIP8L3/PDGFRB/PDGFRA/TGFB1/KIT/PIK3R1/CCL21/SOCS3/IRS1/CCL19	11
GO:0007611	learning or memory	29/1151	273/18903	0.00254365	0.0116479	0.00748293	MEIS2/SERPINF1/PRNP/SYT11/GATM/MAP1A/NLGN3/ITGA5/ATP1A2/ADCY3/JPH4/CCND2/NFATC4/SLC2A4/MEF2C/ITGA8/KIT/ITGA3/S100B/CLDN5/CEBPB/DKK1/PTN/BTG2/PTGS2/SGK1/FOS/EGR2/MME	29
GO:0071216	cellular response to biotic stimulus	28/1151	261/18903	0.00259285	0.0118631	0.00762118	AXL/PLSCR4/CX3CL1/GSTP1/VIM/SIRPA/MEF2C/CASP1/TGFB1/TNFRSF1B/TLR4/EDNRB/PRKCA/CD14/ARID5A/TNFAIP3/CEBPB/CCL5/CXCL6/PYCARD/LTF/CCL2/CXCL1/CXCL2/IL6/ZFP36/SERPINE1/SPON2	28
GO:0050905	neuromuscular process	19/1151	154/18903	0.00261799	0.0119359	0.00766793	EDNRA/ADCY5/SYNM/MAP1A/JPH4/CNTNAP1/HOXD10/DMD/STAC/GSTM2/SPART/STAC2/SLITRK6/DMPK/PENK/RAC3/CASQ1/ITPR1/TNNC1	19
GO:0036303	lymph vessel morphogenesis	6/1151	24/18903	0.00261986	0.0119359	0.00766793	FGF2/PDPN/FOXC1/ACVRL1/EPHA2/CLEC14A	6
GO:0071294	cellular response to zinc ion	6/1151	24/18903	0.00261986	0.0119359	0.00766793	MT1A/MT1X/KCNK3/MT1M/MT1E/MT1G	6
GO:2000353	positive regulation of endothelial cell apoptotic process	6/1151	24/18903	0.00261986	0.0119359	0.00766793	CD40/ANO6/CD248/RGCC/THBS1/CCL2	6
GO:2001026	regulation of endothelial cell chemotaxis	6/1151	24/18903	0.00261986	0.0119359	0.00766793	FGF2/FGFR1/MET/KDR/THBS1/HSPB1	6
GO:0030512	negative regulation of transforming growth factor beta receptor signaling pathway	14/1151	99/18903	0.00264265	0.0120092	0.00771504	CAV2/CAV1/EMILIN1/TGFBR3/TGFB1I1/LTBP1/CHST11/SPRED1/FBN1/HTRA1/SPRY2/SPRY1/TGFB3/HTRA3	14
GO:1901379	regulation of potassium ion transmembrane transport	14/1151	99/18903	0.00264265	0.0120092	0.00771504	CAV1/FLNA/KCNMB1/PRNP/FHL1/ABCC9/ANO6/ATP1B2/KCNH2/KCNAB1/CASQ2/EDN3/ATP1B1/KCNK3	14
GO:2001237	negative regulation of extrinsic apoptotic signaling pathway	14/1151	99/18903	0.00264265	0.0120092	0.00771504	CX3CL1/GSTP1/FAIM2/EYA1/ARHGEF2/SNAI2/BMP4/UNC5B/LGALS3/BCL2/SFRP2/TNFAIP3/THBS1/SERPINE1	14
GO:0045671	negative regulation of osteoclast differentiation	7/1151	32/18903	0.00267384	0.0121407	0.0077995	SFRP1/INPP5D/FBN1/TLR3/TLR4/PIK3R1/LTF	7
GO:0032271	regulation of protein polymerization	23/1151	201/18903	0.00268223	0.0121685	0.00781736	LMOD1/CLIP3/KIRREL1/GSN/CDC42EP3/SVIL/DAAM2/MET/FHOD3/FCHSD2/MYADM/MAP1B/CDC42EP4/TMOD1/ELN/CAPG/KANK1/HCLS1/CCL21/PYCARD/CORO1A/TMSB15A/CDC42EP5	23
GO:0055076	transition metal ion homeostasis	18/1151	143/18903	0.00268752	0.0121822	0.00782617	HEPH/PRNP/STEAP3/EPAS1/SLC40A1/SLC22A17/BDH2/CYBRD1/LTF/CP/SOD2/S100A9/MT1A/LCN2/MT1X/MT1M/MT1E/MT1G	18
GO:0007566	embryo implantation	10/1151	59/18903	0.00276039	0.0124502	0.00799833	GJA1/SYDE1/FBLN1/MMP2/TGFBR2/ITGB4/IGFBP7/TIMP1/PTGS2/SCGB1A1	10
GO:0045604	regulation of epidermal cell differentiation	10/1151	59/18903	0.00276039	0.0124502	0.00799833	FGF2/FOXC1/BMP4/TP63/ZFP36L1/DLL1/AQP3/ZFP36/PLAAT4/ALOX15B	10
GO:0031268	pseudopodium organization	5/1151	17/18903	0.00277211	0.0124502	0.00799833	CDC42EP3/CDC42EP4/KIT/CCL21/CDC42EP5	5
GO:0033623	regulation of integrin activation	5/1151	17/18903	0.00277211	0.0124502	0.00799833	FERMT2/JAM3/SELP/FBLIM1/FERMT1	5
GO:0036005	response to macrophage colony-stimulating factor	5/1151	17/18903	0.00277211	0.0124502	0.00799833	CSF1/PDE2A/CSF1R/TLR4/ALPL	5
GO:0036342	post-anal tail morphogenesis	5/1151	17/18903	0.00277211	0.0124502	0.00799833	CHST11/DCHS1/TP63/EPHA2/SFRP2	5
GO:0042481	regulation of odontogenesis	5/1151	17/18903	0.00277211	0.0124502	0.00799833	CSF1/BMP4/NGFR/CD34/EDN1	5
GO:0051895	negative regulation of focal adhesion assembly	5/1151	17/18903	0.00277211	0.0124502	0.00799833	MMP14/CORO1C/FAM107A/ACVRL1/THBS1	5
GO:0072378	blood coagulation, fibrin clot formation	5/1151	17/18903	0.00277211	0.0124502	0.00799833	FLNA/FBLN1/FN1/THBD/F13A1	5
GO:0150118	negative regulation of cell-substrate junction organization	5/1151	17/18903	0.00277211	0.0124502	0.00799833	MMP14/CORO1C/FAM107A/ACVRL1/THBS1	5
GO:1903236	regulation of leukocyte tethering or rolling	5/1151	17/18903	0.00277211	0.0124502	0.00799833	SELP/CHST2/CXCL12/CCL21/SELE	5
GO:0050777	negative regulation of immune response	22/1151	190/18903	0.00283376	0.0127164	0.00816937	FOXF1/SERPING1/IL33/IFI16/INPP5D/SERPINB9/FGL2/A2M/LGALS3/IL27RA/HLA-E/AHR/ANXA1/COL3A1/TNFAIP3/IL7R/HLA-DRB1/PTPRC/CEACAM1/HLA-F/HLA-A/NPY	22
GO:0007193	adenylate cyclase-inhibiting G protein-coupled receptor signaling pathway	12/1151	79/18903	0.00285075	0.012782	0.00821151	EDNRA/ADCY5/FLNA/LPAR1/GNAZ/PDE2A/OXER1/S1PR1/S1PR3/AKAP12/RGS1/EDN1	12
GO:0014015	positive regulation of gliogenesis	11/1151	69/18903	0.00285835	0.0127947	0.00821967	IL33/NTN1/IL34/TGFB1/TNFRSF1B/IL6ST/CXCR4/PTN/ID2/IL6/EGR2	11
GO:0034394	protein localization to cell surface	11/1151	69/18903	0.00285835	0.0127947	0.00821967	FLNA/TMEM35A/ANGPT1/VCL/MAP1A/GPM6B/FBLN5/JAM3/FGF7/TYROBP/CD177	11
GO:0001776	leukocyte homeostasis	14/1151	100/18903	0.00290481	0.0129623	0.00832733	AXL/CSF1/MEF2C/JAM3/SLC40A1/BCL2/CD74/ANXA1/GPR183/TNFAIP3/IL7R/CXCL6/CORO1A/IL6	14
GO:0010769	regulation of cell morphogenesis involved in differentiation	14/1151	100/18903	0.00290481	0.0129623	0.00832733	FLNA/PDPN/FERMT2/FBLN1/CORO1C/LIMS2/EFNA5/MYADM/ILK/GBP1/KANK1/OLFM4/RAC3/MYOC	14
GO:1904707	positive regulation of vascular associated smooth muscle cell proliferation	9/1151	50/18903	0.00290696	0.0129623	0.00832733	FGF2/GJA1/DDR2/MMP2/IGFBP5/CALCRL/ADAMTS1/EDN1/NR4A3	9
GO:0030513	positive regulation of BMP signaling pathway	8/1151	41/18903	0.00291139	0.0129623	0.00832733	ZNF423/BMP4/ACVRL1/ILK/SULF1/KDR/GPC3/CCN1	8
GO:0072210	metanephric nephron development	8/1151	41/18903	0.00291139	0.0129623	0.00832733	TCF21/BMP4/PDGFRB/AQP1/PDGFRA/CD34/LAMB2/EGR1	8
GO:1903524	positive regulation of blood circulation	8/1151	41/18903	0.00291139	0.0129623	0.00832733	TPM1/ATP1A2/CCN2/TGFB2/ADRA1D/EDN3/EDN1/CHGA	8
GO:0001959	regulation of cytokine-mediated signaling pathway	20/1151	167/18903	0.00291507	0.0129623	0.00832733	CAV1/AXL/ANGPT1/CSF1/GAS6/GSTP1/STING1/CASP1/ECM1/ROBO1/CCDC3/CD74/TNFAIP3/CXCR4/CCL5/LAPTM5/PYCARD/PTPRC/EDN1/IL6	20
GO:0030307	positive regulation of cell growth	20/1151	167/18903	0.00291507	0.0129623	0.00832733	MMP14/RND2/SFRP1/EFNA5/NTN1/MAP1B/TEAD1/TGFB2/BCL2/CYBA/SFRP2/CXCL12/FN1/HPN/CRABP2/CXCR4/KRT17/EDN1/S100A9/CD38	20
GO:0002706	regulation of lymphocyte mediated immunity	21/1151	179/18903	0.00298245	0.0132291	0.00849871	CD40/MR1/SERPINB9/TGFB1/GATA3/TNFRSF1B/IL27RA/HLA-E/C3/AHR/ARID5A/HLA-DRA/KLRB1/IL7R/HLA-DRB1/PTPRC/CEACAM1/HLA-F/HLA-A/IL6/AZGP1	21
GO:0045580	regulation of T cell differentiation	21/1151	179/18903	0.00298245	0.0132291	0.00849871	VSIR/ZEB1/TGFBR2/SMARCD3/GLI3/BMP4/FGL2/HLA-DOA/GATA3/RUNX1/CD74/ANXA1/HLA-DRA/IL7R/HLA-DRB1/PTPRC/CD2/IL2RG/CCL19/EGR3/JUNB	21
GO:0060759	regulation of response to cytokine stimulus	21/1151	179/18903	0.00298245	0.0132291	0.00849871	CAV1/AXL/ANGPT1/CSF1/GAS6/GSTP1/STING1/CASP1/ECM1/ROBO1/CCDC3/TLR4/CD74/TNFAIP3/CXCR4/CCL5/LAPTM5/PYCARD/PTPRC/EDN1/IL6	21
GO:2001259	positive regulation of cation channel activity	12/1151	80/18903	0.00317227	0.0140256	0.00901042	EDNRA/JPH2/NLGN3/STAC/GSTM2/STAC2/CTSS/CCL2/EDN1/CASQ1/KCNK3/CACNG4	12
GO:0061337	cardiac conduction	14/1151	101/18903	0.00318792	0.0140256	0.00901042	ATP2B4/GJA1/CAV1/FLNA/SLC8A1/ISL1/PLN/ABCC9/GJC1/ATP1A2/ATP1B2/KCNH2/CASQ2/ATP1B1	14
GO:0003139	secondary heart field specification	4/1151	11/18903	0.00319333	0.0140256	0.00901042	ISL1/SMARCD3/BMP4/MEF2C	4
GO:0014820	tonic smooth muscle contraction	4/1151	11/18903	0.00319333	0.0140256	0.00901042	EDNRA/MYLK/EDN1/CD38	4
GO:0032836	glomerular basement membrane development	4/1151	11/18903	0.00319333	0.0140256	0.00901042	NID1/SULF2/SULF1/LAMB2	4
GO:0045060	negative thymic T cell selection	4/1151	11/18903	0.00319333	0.0140256	0.00901042	GLI3/CD74/CD3E/PTPRC	4
GO:0048563	post-embryonic animal organ morphogenesis	4/1151	11/18903	0.00319333	0.0140256	0.00901042	EFEMP1/FBN1/MFAP2/KDR	4
GO:0060601	lateral sprouting from an epithelium	4/1151	11/18903	0.00319333	0.0140256	0.00901042	BMP4/FGFR2/TP63/SULF1	4
GO:1904238	pericyte cell differentiation	4/1151	11/18903	0.00319333	0.0140256	0.00901042	ACTA2/BMP4/CD34/EPHA2	4
GO:2000392	regulation of lamellipodium morphogenesis	4/1151	11/18903	0.00319333	0.0140256	0.00901042	PDPN/CORO1C/KANK1/ENPP2	4
GO:2000727	positive regulation of cardiac muscle cell differentiation	4/1151	11/18903	0.00319333	0.0140256	0.00901042	MYOCD/BMP4/MEF2C/TGFB1	4
GO:2001225	regulation of chloride transport	4/1151	11/18903	0.00319333	0.0140256	0.00901042	PRNP/ABCB1/GABRE/CFTR	4
GO:0032722	positive regulation of chemokine production	11/1151	70/18903	0.00320879	0.0140775	0.00904374	IL33/CSF1R/TLR3/TLR4/CD74/TRPV4/AIF1/PYCARD/EGR1/IL6/ALOX15B	11
GO:0002828	regulation of type 2 immune response	7/1151	33/18903	0.00321823	0.0140775	0.00904374	IL33/ECM1/GATA3/IL27RA/CD74/ANXA1/IL6	7
GO:0045577	regulation of B cell differentiation	7/1151	33/18903	0.00321823	0.0140775	0.00904374	MMP14/SFRP1/INPP5D/ZFP36L1/ZFP36L2/IL2RG/ID2	7
GO:0060351	cartilage development involved in endochondral bone morphogenesis	7/1151	33/18903	0.00321823	0.0140775	0.00904374	ANXA6/RARB/TGFBR2/RARG/COL27A1/TRPV4/COL1A1	7
GO:0070633	transepithelial transport	7/1151	33/18903	0.00321823	0.0140775	0.00904374	AQP1/ABCB1/ABCG2/EDNRB/CFTR/EDN1/ITPR1	7
GO:0050864	regulation of B cell activation	23/1151	204/18903	0.00323665	0.0141465	0.00908809	MMP14/CD40/SFRP1/INPP5D/MEF2C/TGFB1/ZFP36L1/IL27RA/ZFP36L2/BCL2/TLR4/CD74/AHR/GPR183/TNFAIP3/LAPTM5/PTPRC/TYROBP/IL2RG/ID2/IL6/IGLL5/CD38	23
GO:0045445	myoblast differentiation	15/1151	112/18903	0.00324426	0.0141683	0.00910207	MYOCD/ISL1/BOC/SOX15/SMARCD3/LGALS1/BMP4/MEF2C/EPAS1/ID3/TGFB1/ZFP36L1/DLL1/IGFBP3/SDC1	15
GO:0045932	negative regulation of muscle contraction	6/1151	25/18903	0.00327202	0.0142663	0.00916505	PDE5A/KCNMA1/PRKG1/ATP1A2/CALCRL/PTGS2	6
GO:1904996	positive regulation of leukocyte adhesion to vascular endothelial cell	6/1151	25/18903	0.00327202	0.0142663	0.00916505	SELP/CHST2/ETS1/ITGB2/SELE/IL6	6
GO:0045058	T cell selection	9/1151	51/18903	0.00334296	0.0145403	0.00934105	GLI3/GATA3/BCL2/CD74/CD3E/CD4/PTPRC/CD3D/IL6	9
GO:0046580	negative regulation of Ras protein signal transduction	9/1151	51/18903	0.00334296	0.0145403	0.00934105	MET/RASA3/SPRY2/SPRY1/KANK1/TGFB2/ITGA3/HEG1/MYOC	9
GO:0060425	lung morphogenesis	9/1151	51/18903	0.00334296	0.0145403	0.00934105	FOXF1/TCF21/TGFBR2/BMP4/HHIP/FGFR2/SPRY2/SPRY1/FGF7	9
GO:0031333	negative regulation of protein-containing complex assembly	18/1151	146/18903	0.00337127	0.0146515	0.00941254	LMOD1/CLIP3/ISL1/GSN/SVIL/CLU/LMO4/DACT1/CRYAB/FHOD3/MYADM/JAM3/TMOD1/CAPG/KANK1/DKK1/TMSB15A/CLDN7	18
GO:0042475	odontogenesis of dentin-containing tooth	13/1151	91/18903	0.00337793	0.0146686	0.00942352	FOXC1/CSF1/FST/GLI3/BMP4/HTRA1/PDGFRA/NGFR/TP63/ITGB6/CFTR/SERPINE1/DLX1	13
GO:0031670	cellular response to nutrient	8/1151	42/18903	0.00340802	0.0147873	0.00949977	KANK2/GAS6/SFRP1/SNAI2/FOLR2/PENK/POSTN/COL1A1	8
GO:0048839	inner ear development	22/1151	193/18903	0.00343559	0.0148949	0.0095689	FGF2/PRRX1/ZEB1/EYA1/NTN1/GLI3/BMP4/PDGFRB/DCHS1/CYTL1/FGFR2/SPRY2/ITGA8/GATA3/TGFB3/TGFB2/SLITRK6/HPN/DLL1/FRZB/CEBPD/KCNK3	22
GO:0071692	protein localization to extracellular region	36/1151	368/18903	0.00344597	0.0149279	0.00959007	ADCY5/CAVIN1/ISL1/ACSL4/ANO1/SFRP1/EFNA5/LTBP1/FOXO1/FBN1/STEAP3/PAM/CD200/LTBP2/TGFB1/ARL4D/TGFB3/APBB1/TGFB2/SNCG/TLR4/EDNRB/ANXA1/CFTR/CCL5/IRS1/HLA-DRB1/RCN3/NBL1/MYOM1/ANG/IL6/SAA1/CD38/CHGA/OR51E2	36
GO:0051607	defense response to virus	31/1151	304/18903	0.00345531	0.0149563	0.00960834	KCNJ8/APOBEC3C/IL33/ABCC9/CD40/IFI16/STING1/NLRP1/HTRA1/CASP1/APOBEC3G/TRIM22/FGL2/TLR3/GBP1/BCL2/CD207/RNASE6/IFITM3/IFITM2/TNFAIP3/PLSCR1/BIRC3/IFITM1/PYCARD/BST2/PTPRC/MX1/DDIT4/IL6/SPON2	31
GO:1900180	regulation of protein localization to nucleus	17/1151	135/18903	0.00346248	0.0149753	0.00962052	FLNA/FERMT2/ANGPT1/GLIS2/WWTR1/GLI3/BMP4/MDFIC/NGFR/TGFB1/PKIG/RASSF5/TRIM29/HCLS1/PIK3R1/FERMT1/PTGS2	17
GO:0060419	heart growth	14/1151	102/18903	0.0034932	0.015096	0.00969809	FGF2/TGFBR3/FOXC1/ACACB/TGFBR2/MEF2C/FGFR2/S1PR1/TGFB2/RUNX1/HEG1/DUSP6/PI16/EDN1	14
GO:0034113	heterotypic cell-cell adhesion	10/1151	61/18903	0.00355006	0.0153294	0.00984801	ITGA7/ITGA5/SIRPA/MYADM/JAM3/CD200/VCAM1/ITGB2/PTPRC/CD2	10
GO:0016032	viral process	40/1151	421/18903	0.00356226	0.0153698	0.00987394	CAV2/STOM/CAV1/AXL/APOBEC3C/GSN/IFI16/GAS6/ITGA5/CTSB/LGALS1/ST6GALNAC4/APOBEC3G/MDFIC/CSF1R/NCAM1/TRIM22/EPHA2/ITGB6/BCL2/CD74/CH25H/IFITM3/HPN/IFITM2/ITGA2/CXCR4/CCL5/SELPLG/CD4/HLA-DRB1/PLSCR1/IFITM1/BST2/LTF/CLDN1/CCL2/MX1/ZFP36/ANPEP	40
GO:0032715	negative regulation of interleukin-6 production	11/1151	71/18903	0.00359289	0.0154895	0.00995086	SYT11/CX3CL1/GAS6/INPP5D/SIRPA/CD200/IL27RA/TLR4/TNFAIP3/KLF2/ORM1	11
GO:0140546	defense response to symbiont	31/1151	305/18903	0.00362882	0.0156019	0.0100231	KCNJ8/APOBEC3C/IL33/ABCC9/CD40/IFI16/STING1/NLRP1/HTRA1/CASP1/APOBEC3G/TRIM22/FGL2/TLR3/GBP1/BCL2/CD207/RNASE6/IFITM3/IFITM2/TNFAIP3/PLSCR1/BIRC3/IFITM1/PYCARD/BST2/PTPRC/MX1/DDIT4/IL6/SPON2	31
GO:0001946	lymphangiogenesis	5/1151	18/18903	0.00364799	0.0156019	0.0100231	PDPN/FOXC1/ACVRL1/EPHA2/CLEC14A	5
GO:0006957	complement activation, alternative pathway	5/1151	18/18903	0.00364799	0.0156019	0.0100231	CFH/C7/C3/CFD/CFB	5
GO:0048486	parasympathetic nervous system development	5/1151	18/18903	0.00364799	0.0156019	0.0100231	NAV2/NRP2/HOXB2/ACKR3/EGR2	5
GO:0051770	positive regulation of nitric-oxide synthase biosynthetic process	5/1151	18/18903	0.00364799	0.0156019	0.0100231	IL33/TLR4/KDR/AKAP12/CCL2	5
GO:0051917	regulation of fibrinolysis	5/1151	18/18903	0.00364799	0.0156019	0.0100231	PLAU/THBD/THBS1/SERPINF2/SERPINE1	5
GO:0060602	branch elongation of an epithelium	5/1151	18/18903	0.00364799	0.0156019	0.0100231	HOXD13/BMP4/FGFR2/SPRY2/SPRY1	5
GO:0061687	detoxification of inorganic compound	5/1151	18/18903	0.00364799	0.0156019	0.0100231	MT1A/MT1X/MT1M/MT1E/MT1G	5
GO:0072673	lamellipodium morphogenesis	5/1151	18/18903	0.00364799	0.0156019	0.0100231	PDPN/CORO1C/KANK1/PLEKHO1/ENPP2	5
GO:2000811	negative regulation of anoikis	5/1151	18/18903	0.00364799	0.0156019	0.0100231	CAV1/ITGA5/SNAI2/BCL2/PDK4	5
GO:0010952	positive regulation of peptidase activity	22/1151	194/18903	0.00365858	0.0156348	0.0100442	CAV1/GSN/VSIR/FBLN1/IFI16/NLRP1/PCOLCE/CASP1/ROBO1/ANTXR1/SOX7/NGFR/P2RX1/CCN2/SFRP2/PCOLCE2/FN1/LAPTM5/PYCARD/RCN3/CCN1/S100A9	22
GO:0002028	regulation of sodium ion transport	13/1151	92/18903	0.00371991	0.0158842	0.0102044	ATP2B4/STOM/SLC8A1/CNTN1/ATP1A2/FXYD6/ATP1B2/DMD/FXYD5/ATP1B1/DMPK/PER1/NKAIN1	13
GO:0007498	mesoderm development	17/1151	136/18903	0.00373868	0.0159391	0.0102397	GJA1/FOXF1/FOXC1/EYA1/BMP4/ITGB4/ETS2/FGFR2/TP63/ITGA8/ZFP36L1/EPHA2/ITGA3/SFRP2/ITGA2/DKK1/SECTM1	17
GO:0010565	regulation of cellular ketone metabolic process	17/1151	136/18903	0.00373868	0.0159391	0.0102397	ATP2B4/CAV1/DKK3/RGN/ACACB/CES1/FABP3/ATCAY/PDK4/CD74/FMO2/ANXA1/IRS1/CEACAM1/PTGS2/EGR1/NR4A3	17
GO:0002762	negative regulation of myeloid leukocyte differentiation	9/1151	52/18903	0.00382876	0.0162844	0.0104615	SFRP1/INPP5D/FBN1/TLR3/TLR4/PIK3R1/C1QC/CEACAM1/LTF	9
GO:0043268	positive regulation of potassium ion transport	9/1151	52/18903	0.00382876	0.0162844	0.0104615	FLNA/KCNMB1/FHL1/ANO6/ATP1B2/KCNH2/EDN3/ATP1B1/KCNK3	9
GO:0051496	positive regulation of stress fiber assembly	9/1151	52/18903	0.00382876	0.0162844	0.0104615	FERMT2/LPAR1/TPM1/SFRP1/CCN2/TGFB3/RGCC/MYOC/SERPINF2	9
GO:0033238	regulation of cellular amine metabolic process	7/1151	34/18903	0.00384325	0.0163202	0.0104845	ATP2B4/ATCAY/MAOB/ITGB2/ALDH2/NNMT/NPY	7
GO:0042044	fluid transport	7/1151	34/18903	0.00384325	0.0163202	0.0104845	AQP1/SLC14A1/EDNRB/CFTR/EDN1/ITPR1/AQP3	7
GO:0009408	response to heat	15/1151	114/18903	0.00384813	0.016328	0.0104895	HSPB6/ANO1/DNAJB4/CRYAB/IGFBP7/STAC/CD34/IER5/TRPV4/CXCL12/CD14/THBS1/CASQ1/PTGS2/HSPB1	15
GO:0051279	regulation of release of sequestered calcium ion into cytosol	12/1151	82/18903	0.0039032	0.0165486	0.0106313	SLC8A1/JPH2/PLN/CX3CL1/ATP1A2/JPH4/DMD/GSTM2/CYBA/CASQ2/CORO1A/CASQ1	12
GO:0048713	regulation of oligodendrocyte differentiation	8/1151	43/18903	0.00396785	0.0167435	0.0107564	IL33/DAAM2/IL34/ID4/TNFRSF1B/CXCR4/PTN/DLX1	8
GO:0051150	regulation of smooth muscle cell differentiation	8/1151	43/18903	0.00396785	0.0167435	0.0107564	EFEMP2/MYOCD/ZEB1/BMP4/FGFR2/KIT/RBPMS2/SOD2	8
GO:0060412	ventricular septum morphogenesis	8/1151	43/18903	0.00396785	0.0167435	0.0107564	TGFBR3/TGFBR2/BMP4/ROBO1/FGFR2/TGFB2/HEYL/FGFRL1	8
GO:0071364	cellular response to epidermal growth factor stimulus	8/1151	43/18903	0.00396785	0.0167435	0.0107564	FOXC1/SNAI2/ZFP36L1/ZFP36L2/ID1/COL1A1/FOS/ZFP36	8
GO:0097009	energy homeostasis	8/1151	43/18903	0.00396785	0.0167435	0.0107564	ACACB/LEPR/FOXO1/MRAP2/TRPV4/FMO2/DLL1/NR4A3	8
GO:1904037	positive regulation of epithelial cell apoptotic process	8/1151	43/18903	0.00396785	0.0167435	0.0107564	GSN/CD40/ANO6/CD248/RGCC/THBS1/CCL2/IL6	8
GO:0060393	regulation of pathway-restricted SMAD protein phosphorylation	10/1151	62/18903	0.00400693	0.0168938	0.010853	RBPMS/EMILIN1/TGFBR2/BMP4/ACVRL1/TGFB1/TGFB3/TGFB2/LRP1/DKK1	10
GO:0014743	regulation of muscle hypertrophy	11/1151	72/18903	0.0040129	0.0168938	0.010853	ATP2B4/PDE5A/LMCD1/FOXO1/TNFRSF1B/IL6ST/IGFBP5/PRKCA/PI16/EDN1/NR4A3	11
GO:0035914	skeletal muscle cell differentiation	11/1151	72/18903	0.0040129	0.0168938	0.010853	ASB2/MYOCD/HLF/MEF2C/KLF5/HEYL/BTG2/EGR1/FOS/EGR2/ATF3	11
GO:0002026	regulation of the force of heart contraction	6/1151	26/18903	0.00403777	0.0169322	0.0108777	ATP2B4/CAV1/SLC8A1/PLN/ATP1A2/CHGA	6
GO:0010954	positive regulation of protein processing	6/1151	26/18903	0.00403777	0.0169322	0.0108777	SPON1/MMP14/GSN/ANXA2/HPN/CLEC3B	6
GO:0035994	response to muscle stretch	6/1151	26/18903	0.00403777	0.0169322	0.0108777	SLC8A1/DDR2/GSN/DMD/EDN1/FOS	6
GO:0060314	regulation of ryanodine-sensitive calcium-release channel activity	6/1151	26/18903	0.00403777	0.0169322	0.0108777	JPH2/PLN/JPH4/DMD/GSTM2/CASQ2	6
GO:1903901	negative regulation of viral life cycle	6/1151	26/18903	0.00403777	0.0169322	0.0108777	GSN/CH25H/IFITM3/IFITM2/IFITM1/BST2	6
GO:0110020	regulation of actomyosin structure organization	14/1151	104/18903	0.00417537	0.0174955	0.0112396	FERMT2/LPAR1/TPM1/SFRP1/MET/CCN2/S1PR1/TGFB3/PIK3R1/RGCC/MYOC/RHPN1/SERPINF2/EDN1	14
GO:0046634	regulation of alpha-beta T cell activation	15/1151	115/18903	0.00418282	0.0175131	0.0112509	VSIR/TGFBR2/GLI3/GATA3/HLA-E/RUNX1/ANXA1/HLA-DRA/CD3E/HLA-DRB1/PTPRC/IL2RG/CCL19/HLA-A/JUNB	15
GO:0019216	regulation of lipid metabolic process	34/1151	347/18903	0.00428354	0.0179208	0.0115128	FGF2/CAV1/SORBS1/DKK3/RGN/ACACB/CES1/RAB38/TNFAIP8L3/FABP3/SNAI2/RARRES2/PDGFRB/IGFBP7/PDGFRA/TGFB1/CCDC3/KIT/C3/PDK4/CD74/NR3C1/FMO2/ANXA1/CCL21/IRS1/CEACAM1/CCN1/HSD17B13/CCL19/ID2/PTGS2/EGR1/NR4A3	34
GO:0048872	homeostasis of number of cells	30/1151	296/18903	0.00434429	0.0181609	0.011667	AXL/TGFBR3/GLIS2/CSF1/INPP5D/BMP4/MEF2C/EPAS1/JAM3/EMCN/ZFP36L1/SLC40A1/GATA3/KIT/BCL2/ARMCX1/CD74/ETS1/ANXA1/HCLS1/GPR183/TNFAIP3/IL7R/KLF2/CXCL6/CORO1A/RAC3/ID2/IL6/ZFP36	30
GO:0030100	regulation of endocytosis	23/1151	209/18903	0.0043739	0.0182705	0.0117374	CAV1/AXL/CLIP3/ANGPT1/SYT11/RAB31/CLU/ANO6/EPHA3/ANXA2/LGALS3/C3/GPC3/CD14/CCL21/DLL1/ITGA2/LRP1/DKK1/CCL19/SELE/CD177/SERPINE1	23
GO:0042246	tissue regeneration	11/1151	73/18903	0.00447112	0.0186621	0.011989	FZD7/TGFBR2/SOX15/SGCA/LGR6/RUNX1/ANXA1/CPQ/HOPX/KLF5/PTN	11
GO:0051492	regulation of stress fiber assembly	13/1151	94/18903	0.00448794	0.0186745	0.011997	FERMT2/LPAR1/TPM1/SFRP1/MET/CCN2/S1PR1/TGFB3/PIK3R1/RGCC/MYOC/RHPN1/SERPINF2	13
GO:0030010	establishment of cell polarity	18/1151	150/18903	0.00450175	0.0186745	0.011997	GJA1/FOXF1/GSN/MSN/FEZ1/MAP1B/JAM3/SPRY2/SPRY1/GATA3/UST/AMOTL2/KANK1/CCL21/AMOT/FERMT1/CCL19/MISP	18
GO:0070542	response to fatty acid	10/1151	63/18903	0.00450902	0.0186745	0.011997	FOXO1/ID3/CCN2/PDK4/PID1/IRS1/CLDN1/EDN1/PTGS2/OR51E2	10
GO:0014808	release of sequestered calcium ion into cytosol by sarcoplasmic reticulum	7/1151	35/18903	0.0045562	0.0186745	0.011997	SLC8A1/PLN/ATP1A2/DMD/GSTM2/CASQ2/CASQ1	7
GO:0032633	interleukin-4 production	7/1151	35/18903	0.0045562	0.0186745	0.011997	IL33/GATA3/HLA-E/CEBPB/CD3E/HLA-DRB1/SCGB1A1	7
GO:0032673	regulation of interleukin-4 production	7/1151	35/18903	0.0045562	0.0186745	0.011997	IL33/GATA3/HLA-E/CEBPB/CD3E/HLA-DRB1/SCGB1A1	7
GO:0035137	hindlimb morphogenesis	7/1151	35/18903	0.0045562	0.0186745	0.011997	RARB/RARG/BMP4/HOXD10/TP63/GPC3/HOXD9	7
GO:0048048	embryonic eye morphogenesis	7/1151	35/18903	0.0045562	0.0186745	0.011997	EFEMP1/ZEB1/RARB/RARG/FBN1/MFAP2/FOXF2	7
GO:0060914	heart formation	7/1151	35/18903	0.0045562	0.0186745	0.011997	ISL1/SMARCD3/EYA1/BMP4/MEF2C/ROBO1/DKK1	7
GO:0071398	cellular response to fatty acid	7/1151	35/18903	0.0045562	0.0186745	0.011997	ID3/PDK4/PID1/IRS1/CLDN1/EDN1/OR51E2	7
GO:2000352	negative regulation of endothelial cell apoptotic process	7/1151	35/18903	0.0045562	0.0186745	0.011997	ANGPT1/GAS6/NDNF/GATA3/KDR/TNFAIP3/SERPINE1	7
GO:0001867	complement activation, lectin pathway	4/1151	12/18903	0.00456093	0.0186745	0.011997	SERPING1/MASP1/MFAP4/A2M	4
GO:0002424	T cell mediated immune response to tumor cell	4/1151	12/18903	0.00456093	0.0186745	0.011997	MR1/AHR/HLA-DRB1/HLA-A	4
GO:0033629	negative regulation of cell adhesion mediated by integrin	4/1151	12/18903	0.00456093	0.0186745	0.011997	SNAI2/JAM3/SERPINE1/CYP1B1	4
GO:0043383	negative T cell selection	4/1151	12/18903	0.00456093	0.0186745	0.011997	GLI3/CD74/CD3E/PTPRC	4
GO:0045602	negative regulation of endothelial cell differentiation	4/1151	12/18903	0.00456093	0.0186745	0.011997	ZEB1/ACVRL1/S1PR3/ID1	4
GO:0048103	somatic stem cell division	4/1151	12/18903	0.00456093	0.0186745	0.011997	FZD7/KIT/ZFP36L2/TGFB2	4
GO:0060442	branching involved in prostate gland morphogenesis	4/1151	12/18903	0.00456093	0.0186745	0.011997	HOXD13/SFRP1/BMP4/FGFR2	4
GO:0061309	cardiac neural crest cell development involved in outflow tract morphogenesis	4/1151	12/18903	0.00456093	0.0186745	0.011997	EDNRA/BMP4/EDN1/SEMA3C	4
GO:0071107	response to parathyroid hormone	4/1151	12/18903	0.00456093	0.0186745	0.011997	CSF1/MEF2C/ITGA2/FOS	4
GO:0071635	negative regulation of transforming growth factor beta production	4/1151	12/18903	0.00456093	0.0186745	0.011997	LAPTM4B/CDH3/FN1/TYROBP	4
GO:0072110	glomerular mesangial cell proliferation	4/1151	12/18903	0.00456093	0.0186745	0.011997	PDGFD/BMP4/PDGFRB/EGR1	4
GO:0097084	vascular associated smooth muscle cell development	4/1151	12/18903	0.00456093	0.0186745	0.011997	EDNRA/EFEMP2/SGCB/NFATC4	4
GO:1900272	negative regulation of long-term synaptic potentiation	4/1151	12/18903	0.00456093	0.0186745	0.011997	PRNP/FAM107A/PTN/TYROBP	4
GO:2001214	positive regulation of vasculogenesis	4/1151	12/18903	0.00456093	0.0186745	0.011997	CD34/KDR/RRAS/CEACAM1	4
GO:0003009	skeletal muscle contraction	8/1151	44/18903	0.00459602	0.0187752	0.0120617	SYNM/DMD/STAC/GSTM2/STAC2/DMPK/CASQ1/TNNC1	8
GO:1900026	positive regulation of substrate adhesion-dependent cell spreading	8/1151	44/18903	0.00459602	0.0187752	0.0120617	FLNA/FERMT2/LIMS2/MYADM/ILK/OLFM4/RAC3/MYOC	8
GO:1904407	positive regulation of nitric oxide metabolic process	8/1151	44/18903	0.00459602	0.0187752	0.0120617	CLU/TLR4/AIF1/KLF2/SOD2/EDN1/PTGS2/NPY	8
GO:0051090	regulation of DNA-binding transcription factor activity	42/1151	454/18903	0.00461041	0.0188197	0.0120903	CAV1/FLNA/PTGIS/PRNP/DDR2/MYOCD/TCEAL7/GLIS2/CD40/CX3CL1/CLU/GAS6/STING1/PLPP3/RAB7B/ARHGEF2/GLI3/PRKCB/CYTL1/ID3/CD200/TRIM22/TLR3/NDP/KIT/NDN/TLR4/ID1/HCLS1/TNFAIP3/HEYL/RGCC/BEX1/PYCARD/LTF/EDN1/S100A9/ID2/SGK1/IL6/BHLHE40/CYP1B1	42
GO:0046631	alpha-beta T cell activation	20/1151	174/18903	0.00466522	0.019029	0.0122247	VSIR/TGFBR2/GLI3/ELF4/GATA3/HLA-E/BCL2/RUNX1/ANXA1/GPR183/HLA-DRA/CD3E/HLA-DRB1/PTPRC/CD3D/IL2RG/CCL19/HLA-A/IL6/JUNB	20
GO:0051604	protein maturation	33/1151	336/18903	0.00467063	0.0190366	0.0122296	FLNA/SPON1/PRNP/MMP14/GSN/VSIR/FBLN1/IFI16/C1R/GLI3/GAS1/ADAM19/CASP1/SRGN/CPXM1/ANXA2/RUNX1/PLAU/FN1/THBD/CTSS/HPN/CPA3/CPXM2/CLEC3B/PYCARD/CST7/THBS1/F13A1/SERPINF2/CPM/SERPINE1/MME	33
GO:0002523	leukocyte migration involved in inflammatory response	5/1151	19/18903	0.00470579	0.0190643	0.0122474	CX3CL1/JAM3/PTN/S100A9/SELE	5
GO:0002544	chronic inflammatory response	5/1151	19/18903	0.00470579	0.0190643	0.0122474	VCAM1/TNFAIP3/CCL5/THBS1/S100A9	5
GO:0003417	growth plate cartilage development	5/1151	19/18903	0.00470579	0.0190643	0.0122474	ANXA6/RARB/TGFBR2/RARG/COL27A1	5
GO:0010544	negative regulation of platelet activation	5/1151	19/18903	0.00470579	0.0190643	0.0122474	C1QTNF1/PRKG1/PDGFRA/THBD/CEACAM1	5
GO:0043031	negative regulation of macrophage activation	5/1151	19/18903	0.00470579	0.0190643	0.0122474	SYT11/CX3CL1/CD200/CST7/PTPRC	5
GO:0045953	negative regulation of natural killer cell mediated cytotoxicity	5/1151	19/18903	0.00470579	0.0190643	0.0122474	SERPINB9/HLA-E/CEACAM1/HLA-F/HLA-A	5
GO:0048245	eosinophil chemotaxis	5/1151	19/18903	0.00470579	0.0190643	0.0122474	CX3CL1/LGALS3/CCL21/CCL5/CCL2	5
GO:0097501	stress response to metal ion	5/1151	19/18903	0.00470579	0.0190643	0.0122474	MT1A/MT1X/MT1M/MT1E/MT1G	5
GO:2000116	regulation of cysteine-type endopeptidase activity	25/1151	235/18903	0.00475174	0.019236	0.0123577	GSN/IFI16/GAS6/CRYAB/NLRP1/AQP1/SERPINB9/CASP1/ROBO1/SOX7/NGFR/P2RX1/TP63/CCN2/SFRP2/LAPTM5/BIRC3/PYCARD/CST7/THBS1/CCN1/LTF/S100A9/PTGS2/CST1	25
GO:0051899	membrane depolarization	12/1151	84/18903	0.00476369	0.0192698	0.0123795	CAV1/SLC8A1/FHL1/ATP1A2/SCN7A/KCNH2/DCN/BCL2/KDR/CACNA1H/MYOC/EDN1	12
GO:0045582	positive regulation of T cell differentiation	15/1151	117/18903	0.00492343	0.019891	0.0127785	VSIR/TGFBR2/SMARCD3/GLI3/GATA3/RUNX1/CD74/ANXA1/HLA-DRA/IL7R/HLA-DRB1/PTPRC/IL2RG/CCL19/EGR3	15
GO:0044342	type B pancreatic cell proliferation	6/1151	27/18903	0.00492834	0.019891	0.0127785	IGFBP4/SERPINB1/SFRP1/IGFBP5/IGFBP3/NR4A3	6
GO:1900746	regulation of vascular endothelial growth factor signaling pathway	6/1151	27/18903	0.00492834	0.019891	0.0127785	ADGRA2/DCN/ROBO1/SPRY2/DLL1/JCAD	6
GO:0019229	regulation of vasoconstriction	10/1151	64/18903	0.00505931	0.0203889	0.0130984	CAV1/MMP2/ATP1A2/P2RX1/ADRA1D/EDN3/ADRA2C/EDN1/PTGS2/CD38	10
GO:0050891	multicellular organismal water homeostasis	10/1151	64/18903	0.00505931	0.0203889	0.0130984	MET/AKR1B1/AQP1/TP63/SCNN1A/TRPV4/CFTR/CLDN1/AQP3/SCNN1G	10
GO:0030574	collagen catabolic process	8/1151	45/18903	0.00529775	0.0212945	0.0136801	MRC2/MMP14/VSIR/MMP2/CTSB/CTSK/CTSS/MMP7	8
GO:0030890	positive regulation of B cell proliferation	8/1151	45/18903	0.00529775	0.0212945	0.0136801	CD40/MEF2C/BCL2/TLR4/CD74/GPR183/PTPRC/CD38	8
GO:1901381	positive regulation of potassium ion transmembrane transport	8/1151	45/18903	0.00529775	0.0212945	0.0136801	FLNA/KCNMB1/ANO6/ATP1B2/KCNH2/EDN3/ATP1B1/KCNK3	8
GO:0010721	negative regulation of cell development	21/1151	188/18903	0.00529986	0.0212945	0.0136801	NPR2/DAAM2/FBLN1/CORO1C/NFATC4/EFNA5/NTN1/FBN1/ID4/GBP1/SPART/KANK1/S1PR3/EDNRB/ID1/FRZB/PTN/LTF/SEMA3C/IL6/DLX1	21
GO:0019934	cGMP-mediated signaling	7/1151	36/18903	0.00536447	0.0214739	0.0137954	IRAG1/NPR2/PRKG1/PDE2A/AQP1/EDNRB/THBS1	7
GO:0033280	response to vitamin D	7/1151	36/18903	0.00536447	0.0214739	0.0137954	KANK2/SFRP1/SNAI2/PENK/ALPL/PTGS2/AQP3	7
GO:0033687	osteoblast proliferation	7/1151	36/18903	0.00536447	0.0214739	0.0137954	SFRP1/FGFR2/BCL2/TMEM119/CCN1/LTF/JUNB	7
GO:0070306	lens fiber cell differentiation	7/1151	36/18903	0.00536447	0.0214739	0.0137954	FGF2/VIM/SPRED1/SPRY2/SPRY1/TMOD1/EPHA2	7
GO:1903514	release of sequestered calcium ion into cytosol by endoplasmic reticulum	7/1151	36/18903	0.00536447	0.0214739	0.0137954	SLC8A1/PLN/ATP1A2/DMD/GSTM2/CASQ2/CASQ1	7
GO:0003073	regulation of systemic arterial blood pressure	13/1151	96/18903	0.00537874	0.021515	0.0138218	TPM1/GAS6/NAV2/CYBA/ADRA1D/EDNRB/EDN3/SLC2A5/CPA3/SERPINF2/SOD2/EDN1/OR51E2	13
GO:0014013	regulation of gliogenesis	14/1151	107/18903	0.00539757	0.0215742	0.0138599	IL33/DAAM2/NTN1/IL34/ID4/TGFB1/TNFRSF1B/IL6ST/CXCR4/PTN/ID2/IL6/EGR2/DLX1	14
GO:0001889	liver development	17/1151	141/18903	0.00540582	0.0215912	0.0138707	TGFBR3/RGN/LIMS2/ALDH1A2/MET/GLI3/ANXA1/HPN/TNFAIP3/ITGA2/FRZB/CEBPB/PTN/CEACAM1/CLDN1/SOD2/IL6	17
GO:0050890	cognition	31/1151	314/18903	0.0055508	0.0221538	0.0142322	MEIS2/SERPINF1/PRNP/SYT11/GATM/MAP1A/NLGN3/ITGA5/ATP1A2/ADCY3/JPH4/CCND2/NFATC4/SLC2A4/FAM107A/MEF2C/ITGA8/KIT/ITGA3/S100B/HLA-DRA/CLDN5/CEBPB/DKK1/PTN/BTG2/PTGS2/SGK1/FOS/EGR2/MME	31
GO:0045137	development of primary sexual characteristics	25/1151	238/18903	0.00558396	0.0222696	0.0143066	MMP14/FOXC1/MMP2/TCF21/SRD5A2/SFRP1/SOX15/LHFPL2/FST/GFRA1/PDGFRB/PDGFRA/TLR3/A2M/GATA3/KIT/TGFB2/BCL2/SFRP2/KDR/CEBPB/ADAMTS1/SDC1/ANG/CYP1B1	25
GO:0002931	response to ischemia	9/1151	55/18903	0.00562294	0.022356	0.0143621	CAV1/CX3CL1/CSF1/FAIM2/MEF2C/CSF1R/NDNF/BCL2/EGR1	9
GO:0006584	catecholamine metabolic process	9/1151	55/18903	0.00562294	0.022356	0.0143621	EDNRA/EPAS1/MOXD1/GATA3/TGFB2/MAOB/ITGB2/ALDH2/NPY	9
GO:0009712	catechol-containing compound metabolic process	9/1151	55/18903	0.00562294	0.022356	0.0143621	EDNRA/EPAS1/MOXD1/GATA3/TGFB2/MAOB/ITGB2/ALDH2/NPY	9
GO:0071320	cellular response to cAMP	9/1151	55/18903	0.00562294	0.022356	0.0143621	SLC8A1/PDE2A/AQP1/ZFP36L1/AHR/IGFBP5/CFTR/PENK/CYP1B1	9
GO:0001906	cell killing	21/1151	189/18903	0.00563058	0.022356	0.0143621	CFH/MR1/SERPINB9/HLA-E/C3/HLA-DRA/KLRB1/IL7R/HLA-DRB1/CXCL6/PTPRC/CEACAM1/CORO1A/CD2/TYROBP/HLA-F/LTF/HLA-A/LYZ/AZGP1/CHGA	21
GO:0071478	cellular response to radiation	21/1151	189/18903	0.00563058	0.022356	0.0143621	MMP2/IFI16/SFRP1/CCND2/NFATC4/MAP3K20/CRYAB/SNAI2/MFAP4/AQP1/GATA3/TIMP1/ITGB6/CYBA/RHOB/SFRP2/GADD45A/PIK3R1/PTGS2/EGR1/MME	21
GO:0051348	negative regulation of transferase activity	28/1151	276/18903	0.00565334	0.0224298	0.0144095	CAV1/SLC8A1/DDR2/MYOCD/RGN/CORO1C/GSTP1/SFRP1/WWTR1/SPRED1/BMP4/AJUBA/SPRY2/SPRY1/PKIG/MVP/SFRP2/GADD45A/HEG1/TNFAIP3/PYCARD/PTPRC/CEACAM1/DUSP1/PTPRT/HSPB1/GADD45B/ZFP36	28
GO:0060760	positive regulation of response to cytokine stimulus	10/1151	65/18903	0.00566087	0.0224431	0.014418	AXL/CSF1/GAS6/STING1/CASP1/TLR4/CD74/CXCR4/LAPTM5/EDN1	10
GO:0006576	cellular biogenic amine metabolic process	13/1151	97/18903	0.00587432	0.0232722	0.0149507	EDNRA/HAAO/EPAS1/MOXD1/GATA3/TGFB2/MAOB/ITGB2/ALDH2/NNMT/SLC22A3/AOC1/NPY	13
GO:0031667	response to nutrient levels	43/1151	474/18903	0.00589588	0.0233404	0.0149945	KANK2/SLC8A1/ZEB1/ACACB/SRD5A2/IFI16/GAS6/SFRP1/TGFBR2/ALDH1A2/FAM107A/SNAI2/FOXO1/MAP1B/CTSK/A2M/BCL2/CYBA/PAGE4/SFRP2/PDK4/TRPV4/NUAK1/VCAM1/ITGA2/FOLR2/PENK/CYBB/KLF10/POSTN/COL1A1/SOD2/ALPL/PTGS2/AQP3/FOS/SLC22A3/ZFP36/AOC1/SSTR1/CYP1B1/ATF3/NPY	43
GO:0098739	import across plasma membrane	22/1151	202/18903	0.00591629	0.023404	0.0150353	ATP2B4/KCNJ8/SLC8A1/PRNP/SLC12A4/SLC16A2/ABCC9/ATP1A2/ATP1B2/KCNH2/P2RX1/SCNN1A/TRPV4/ATP1B1/SLC2A5/FOLR2/RAMP3/THBS1/SLC7A3/SLC2A3/SLC15A2/SCNN1G	22
GO:0002675	positive regulation of acute inflammatory response	6/1151	28/18903	0.00595502	0.0234046	0.0150357	HLA-E/C3/IL6ST/ALOX5AP/PTGS2/IL6	6
GO:0003272	endocardial cushion formation	6/1151	28/18903	0.00595502	0.0234046	0.0150357	TGFBR2/SNAI2/DCHS1/ROBO1/TGFB2/HEYL	6
GO:0071624	positive regulation of granulocyte chemotaxis	6/1151	28/18903	0.00595502	0.0234046	0.0150357	CD74/S100A14/CCL21/RAC2/EDN1/CCL19	6
GO:1903319	positive regulation of protein maturation	6/1151	28/18903	0.00595502	0.0234046	0.0150357	SPON1/MMP14/GSN/ANXA2/HPN/CLEC3B	6
GO:0001780	neutrophil homeostasis	5/1151	20/18903	0.00596435	0.0234046	0.0150357	AXL/CSF1/JAM3/ANXA1/IL6	5
GO:0002716	negative regulation of natural killer cell mediated immunity	5/1151	20/18903	0.00596435	0.0234046	0.0150357	SERPINB9/HLA-E/CEACAM1/HLA-F/HLA-A	5
GO:0002888	positive regulation of myeloid leukocyte mediated immunity	5/1151	20/18903	0.00596435	0.0234046	0.0150357	HLA-E/C3/ITGB2/TYROBP/CD177	5
GO:0003215	cardiac right ventricle morphogenesis	5/1151	20/18903	0.00596435	0.0234046	0.0150357	ISL1/SMARCD3/GATA3/TGFB2/SEMA3C	5
GO:0072376	protein activation cascade	5/1151	20/18903	0.00596435	0.0234046	0.0150357	FLNA/FBLN1/FN1/THBD/F13A1	5
GO:1903978	regulation of microglial cell activation	5/1151	20/18903	0.00596435	0.0234046	0.0150357	SYT11/CX3CL1/CST7/PTPRC/IL6	5
GO:1905209	positive regulation of cardiocyte differentiation	5/1151	20/18903	0.00596435	0.0234046	0.0150357	MYOCD/BMP4/MEF2C/TGFB1/TGFB2	5
GO:0010837	regulation of keratinocyte proliferation	8/1151	46/18903	0.00607838	0.0238	0.0152897	ZEB1/SNAI2/FGFR2/TP63/FGF7/ZFP36L1/CDH3/ZFP36	8
GO:0042088	T-helper 1 type immune response	8/1151	46/18903	0.00607838	0.0238	0.0152897	IL33/IL27RA/PLA2G4A/TLR4/ANXA1/ARID5A/HLA-DRB1/CCL19	8
GO:1904752	regulation of vascular associated smooth muscle cell migration	8/1151	46/18903	0.00607838	0.0238	0.0152897	DDR2/MYOCD/TPM1/PRKG1/MEF2C/IGFBP5/ADAMTS1/NR4A3	8
GO:0007613	memory	15/1151	120/18903	0.00623039	0.0243066	0.0156152	SERPINF1/PRNP/SYT11/MAP1A/ITGA5/CCND2/NFATC4/SLC2A4/ITGA8/ITGA3/S100B/CEBPB/PTN/PTGS2/SGK1	15
GO:0003096	renal sodium ion transport	4/1151	13/18903	0.00627369	0.0243066	0.0156152	EDNRA/EDNRB/EDN1/SGK1	4
GO:0036006	cellular response to macrophage colony-stimulating factor stimulus	4/1151	13/18903	0.00627369	0.0243066	0.0156152	CSF1/PDE2A/CSF1R/TLR4	4
GO:0042415	norepinephrine metabolic process	4/1151	13/18903	0.00627369	0.0243066	0.0156152	EDNRA/EPAS1/MOXD1/GATA3	4
GO:0043568	positive regulation of insulin-like growth factor receptor signaling pathway	4/1151	13/18903	0.00627369	0.0243066	0.0156152	IGFBP4/IGFBP5/CDH3/IGFBP3	4
GO:0051481	negative regulation of cytosolic calcium ion concentration	4/1151	13/18903	0.00627369	0.0243066	0.0156152	SLC8A1/ATP1A2/BCL2/KCNK3	4
GO:0060100	positive regulation of phagocytosis, engulfment	4/1151	13/18903	0.00627369	0.0243066	0.0156152	RAB31/ANO6/C3/ITGA2	4
GO:0070424	regulation of nucleotide-binding oligomerization domain containing signaling pathway	4/1151	13/18903	0.00627369	0.0243066	0.0156152	TLR4/TNFAIP3/BIRC3/SLC15A2	4
GO:0071389	cellular response to mineralocorticoid stimulus	4/1151	13/18903	0.00627369	0.0243066	0.0156152	SCNN1A/EDN1/SGK1/SCNN1G	4
GO:0071481	cellular response to X-ray	4/1151	13/18903	0.00627369	0.0243066	0.0156152	SFRP1/CCND2/GATA3/SFRP2	4
GO:1901862	negative regulation of muscle tissue development	4/1151	13/18903	0.00627369	0.0243066	0.0156152	SOX15/BMP4/TGFB1/IGFBP5	4
GO:1903054	negative regulation of extracellular matrix organization	4/1151	13/18903	0.00627369	0.0243066	0.0156152	EMILIN1/ANTXR1/TGFB1/TNFRSF1B	4
GO:1905155	positive regulation of membrane invagination	4/1151	13/18903	0.00627369	0.0243066	0.0156152	RAB31/ANO6/C3/ITGA2	4
GO:0033144	negative regulation of intracellular steroid hormone receptor signaling pathway	7/1151	37/18903	0.00627559	0.0243066	0.0156152	KANK2/ISL1/TCF21/SFRP1/TP63/HEYL/PER1	7
GO:0071276	cellular response to cadmium ion	7/1151	37/18903	0.00627559	0.0243066	0.0156152	CYBB/MT1A/MT1X/FOS/MT1M/MT1E/MT1G	7
GO:0045682	regulation of epidermis development	10/1151	66/18903	0.00631682	0.0244487	0.0157065	FGF2/FOXC1/BMP4/TP63/ZFP36L1/DLL1/AQP3/ZFP36/PLAAT4/ALOX15B	10
GO:0045069	regulation of viral genome replication	12/1151	87/18903	0.00633149	0.0244879	0.0157316	APOBEC3C/IFI16/APOBEC3G/BCL2/IFITM3/IFITM2/CCL5/PLSCR1/IFITM1/BST2/LTF/MX1	12
GO:0021545	cranial nerve development	9/1151	56/18903	0.00634638	0.0245101	0.015746	LPAR1/ISL1/NAV2/GLI3/NRP2/HOXB2/SLITRK6/ACKR3/EGR2	9
GO:0042908	xenobiotic transport	9/1151	56/18903	0.00634638	0.0245101	0.015746	GJA1/ABCA8/ABCB1/ABCG2/SLC29A1/ABCC3/CLDN1/SLC15A2/SLC22A3	9
GO:0046545	development of primary female sexual characteristics	14/1151	109/18903	0.00636134	0.0245503	0.0157717	MMP14/FOXC1/MMP2/SFRP1/LHFPL2/FST/PDGFRA/A2M/KIT/BCL2/KDR/CEBPB/ADAMTS1/ANG	14
GO:0034219	carbohydrate transmembrane transport	16/1151	132/18903	0.00649358	0.0250427	0.0160881	EDNRA/CLIP3/SORBS1/SLC2A4/PRKCB/AQP1/C3/SLC2A5/PIK3R1/GPC3/PID1/IRS1/SLC2A3/EDN1/AQP3/NR4A3	16
GO:0061008	hepaticobiliary system development	17/1151	144/18903	0.00666774	0.0256959	0.0165077	TGFBR3/RGN/LIMS2/ALDH1A2/MET/GLI3/ANXA1/HPN/TNFAIP3/ITGA2/FRZB/CEBPB/PTN/CEACAM1/CLDN1/SOD2/IL6	17
GO:0010827	regulation of glucose transmembrane transport	11/1151	77/18903	0.00673448	0.0259345	0.016661	EDNRA/CLIP3/SORBS1/PRKCB/C3/PIK3R1/GPC3/PID1/IRS1/EDN1/NR4A3	11
GO:1901879	regulation of protein depolymerization	12/1151	88/18903	0.00693615	0.0266814	0.0171408	LMOD1/BMERB1/NES/GSN/SVIL/CFL2/MAP1A/ARHGEF2/MAP1B/TMOD1/CAPG/TRPV4	12
GO:0060711	labyrinthine layer development	8/1151	47/18903	0.00694331	0.0266814	0.0171408	PLCD3/RSPO3/FGFR2/ZFP36L1/GJB5/SOCS3/CCN1/JUNB	8
GO:0070849	response to epidermal growth factor	8/1151	47/18903	0.00694331	0.0266814	0.0171408	FOXC1/SNAI2/ZFP36L1/ZFP36L2/ID1/COL1A1/FOS/ZFP36	8
GO:0007204	positive regulation of cytosolic calcium ion concentration	22/1151	205/18903	0.00701531	0.0269388	0.0173062	EDNRA/CAV1/ADCY5/SLC8A1/LPAR1/JPH2/PTGER2/C1QTNF1/JPH4/PDGFRA/S1PR1/BCL2/ADRA1D/S1PR3/EDNRB/TRPV4/CXCR4/ACKR3/CD52/EDN1/SAA1/CD38	22
GO:0043954	cellular component maintenance	10/1151	67/18903	0.00703033	0.0269772	0.0173309	FERMT2/PRNP/MYOCD/KIRREL1/KIFC3/CNTNAP1/CSF1R/ITGA3/CLDN1/CD177	10
GO:0001773	myeloid dendritic cell activation	6/1151	29/18903	0.00712906	0.0272976	0.0175367	TGFBR2/ITGB6/ITGB8/PYCARD/CD2/UBD	6
GO:0003156	regulation of animal organ formation	6/1151	29/18903	0.00712906	0.0272976	0.0175367	FGF2/BMP4/ROBO1/SPRY1/SULF1/DKK1	6
GO:0060441	epithelial tube branching involved in lung morphogenesis	6/1151	29/18903	0.00712906	0.0272976	0.0175367	FOXF1/BMP4/HHIP/FGFR2/SPRY2/SPRY1	6
GO:0006749	glutathione metabolic process	9/1151	57/18903	0.00713925	0.0273172	0.0175493	GSTP1/GSTM5/GSTM4/GSTM2/GGT6/GGT5/GSTM3/SOD2/GSTA1	9
GO:0071901	negative regulation of protein serine/threonine kinase activity	15/1151	122/18903	0.00724699	0.0277097	0.0178014	CAV1/SLC8A1/MYOCD/GSTP1/SFRP1/BMP4/SPRY2/SPRY1/PKIG/SFRP2/GADD45A/HEG1/TNFAIP3/PYCARD/DUSP1	15
GO:0030851	granulocyte differentiation	7/1151	38/18903	0.00729712	0.0278419	0.0178864	INPP5D/RUNX1/HCLS1/EVI2B/C1QC/CEACAM1/FASN	7
[truncated: 186 more rows]
