# Supplementary material for: Single-cell RNA combined with bulk RNA analysis to explore oxidative stress and energy metabolism factors and found a new prostate cancer oncogene MXRA8
Source: Aging (Albany NY). 2024 Mar 4;16(5):4469–502. doi: 10.18632/aging.205599 (PMC10968713; doi:10.18632/aging.205599)
Supplement: Supplementary Table 5 [file aging-16-205599-s006.xlsx]

## Sheet: estimate_res
Supplementary Table 5. Result of proportion of immune infiltrating cells.
sample	StromalScore	ImmuneScore	ESTIMATEScore	TumorPurity
TCGA-2A-A8VL-01A	-1068.27	-801.478	-1869.75	0.945871
TCGA-2A-A8VO-01A	-557.94	-400.836	-958.776	0.894158
TCGA-2A-A8VT-01A	-962.637	-562.59	-1525.23	0.928255
TCGA-2A-A8VV-01A	-897.252	-999.755	-1897.01	0.947162
TCGA-2A-A8VX-01A	-1049.28	-1324.12	-2373.41	0.967259
TCGA-2A-A8W1-01A	-1641.77	-887.483	-2529.25	0.972811
TCGA-2A-A8W3-01A	-654.404	-551.217	-1205.62	0.909791
TCGA-2A-AAYF-01A	-900.399	-779.176	-1679.58	0.936443
TCGA-2A-AAYO-01A	-138.188	810.229	672.041	0.762495
TCGA-2A-AAYU-01A	-861.309	-934.794	-1796.1	0.942307
TCGA-4L-AA1F-01A	1757.61	1611.85	3369.45	0.453967
TCGA-CH-5737-01A	-1174.07	-734.937	-1909.01	0.947725
TCGA-CH-5738-01A	41.0418	721.931	762.973	0.753792
TCGA-CH-5739-01A	-20.3558	62.1333	41.7775	0.819006
TCGA-CH-5740-01A	-829.055	-276.952	-1106.01	0.903625
TCGA-CH-5741-01A	-1257.27	-872.132	-2129.4	0.95755
TCGA-CH-5743-01A	-671.333	766.159	94.8255	0.814513
TCGA-CH-5744-01A	-845.095	-260.766	-1105.86	0.903616
TCGA-CH-5745-01A	-229.046	274.567	45.5217	0.818691
TCGA-CH-5746-01A	-1214.7	-908.469	-2123.17	0.957286
TCGA-CH-5748-01A	-1128.59	-700.493	-1829.08	0.943916
TCGA-CH-5750-01A	-757.727	336.934	-420.793	0.856049
TCGA-CH-5751-01A	137.468	1627.71	1765.18	0.649329
TCGA-CH-5752-01A	-491.724	-795.505	-1287.23	0.914698
TCGA-CH-5753-01A	-1041.03	-227.203	-1268.24	0.913568
TCGA-CH-5754-01A	-195.143	702.404	507.261	0.77792
TCGA-CH-5761-01A	-208.651	-562.908	-771.559	0.881517
TCGA-CH-5762-01A	-292.771	282.828	-9.943	0.823339
TCGA-CH-5763-01A	-46.3108	-138.423	-184.734	0.837628
TCGA-CH-5764-01A	-688.658	-230.476	-919.134	0.891537
TCGA-CH-5765-01A	-1057.33	-959.385	-2016.71	0.952651
TCGA-CH-5766-01A	-948.642	-79.4212	-1028.06	0.898665
TCGA-CH-5767-01A	-889.654	-846.02	-1735.67	0.939301
TCGA-CH-5768-01A	-1086.74	-629.582	-1716.32	0.938322
TCGA-CH-5769-01A	-490.332	-258.732	-749.064	0.879953
TCGA-CH-5771-01A	318.556	589.909	908.465	0.739587
TCGA-CH-5772-01A	-440.612	-324.109	-764.721	0.881042
TCGA-CH-5788-01A	-889.077	-747.872	-1636.95	0.93423
TCGA-CH-5789-01A	-544.332	-50.736	-595.068	0.86899
TCGA-CH-5790-01A	-1054.66	-433.245	-1487.9	0.926204
TCGA-CH-5791-01A	-579.785	-328.365	-908.15	0.890806
TCGA-CH-5792-01A	211.935	745.098	957.033	0.73477
TCGA-CH-5794-01A	-1097.15	-599.05	-1696.2	0.937297
TCGA-EJ-5494-01A	-481.046	-104.458	-585.503	0.868295
TCGA-EJ-5495-01A	315.124	317.945	633.069	0.766184
TCGA-EJ-5496-01A	-1241.46	-799.112	-2040.58	0.95371
TCGA-EJ-5497-01A	-483.121	-249.278	-732.399	0.878788
TCGA-EJ-5498-01A	168.536	160.624	329.16	0.79408
TCGA-EJ-5499-01A	-571.806	128.685	-443.121	0.857738
TCGA-EJ-5501-01A	-857.508	-493.573	-1351.08	0.918445
TCGA-EJ-5502-01A	-374.956	210.977	-163.979	0.83596
TCGA-EJ-5503-01A	-458.635	15.1212	-443.514	0.857768
TCGA-EJ-5504-01A	85.9878	-313.848	-227.86	0.841069
TCGA-EJ-5505-01A	-1106.33	-678.8	-1785.13	0.941767
TCGA-EJ-5506-01A	-942.905	-510.338	-1453.24	0.924274
TCGA-EJ-5507-01A	-499.79	-16.961	-516.751	0.863244
TCGA-EJ-5508-01A	-386.986	277.395	-109.591	0.831552
TCGA-EJ-5509-01A	-160.777	370.53	209.753	0.804611
TCGA-EJ-5510-01A	-495.775	51.4284	-444.347	0.857831
TCGA-EJ-5511-01A	-496.937	-757.562	-1254.5	0.912746
TCGA-EJ-5512-01A	-872.074	-684.297	-1556.37	0.929946
TCGA-EJ-5514-01A	153.761	211.148	364.909	0.790879
TCGA-EJ-5515-01A	-652.717	-653.31	-1306.03	0.915809
TCGA-EJ-5516-01A	252.32	168.279	420.598	0.78585
TCGA-EJ-5517-01A	-337.403	84.0932	-253.31	0.843084
TCGA-EJ-5518-01A	225.303	-205.157	20.1455	0.820824
TCGA-EJ-5519-01A	-511.785	-599.184	-1110.97	0.903937
TCGA-EJ-5521-01A	-621.254	-187.831	-809.085	0.884104
TCGA-EJ-5522-01A	-421.682	-39.3041	-460.986	0.859084
TCGA-EJ-5524-01A	165.637	198.045	363.682	0.79099
TCGA-EJ-5525-01A	415.51	-483.742	-68.232	0.828164
TCGA-EJ-5526-01A	-99.4044	-98.8381	-198.242	0.838709
TCGA-EJ-5527-01A	57.504	111.651	169.155	0.808135
TCGA-EJ-5530-01A	-452.595	-691.099	-1143.69	0.90598
TCGA-EJ-5531-01A	-286.698	389.94	103.242	0.813796
TCGA-EJ-5532-01A	-470.785	-599.635	-1070.42	0.901375
TCGA-EJ-5542-01A	-224.886	-439.965	-664.85	0.874013
TCGA-EJ-7115-01A	-297.917	-480.529	-778.446	0.881994
TCGA-EJ-7123-01A	-793.493	-696.397	-1489.89	0.926314
TCGA-EJ-7125-01A	-389.131	-171.778	-560.909	0.866498
TCGA-EJ-7314-01A	-1249.76	-707.139	-1956.9	0.949945
TCGA-EJ-7315-01A	224.766	895.451	1120.22	0.718313
TCGA-EJ-7317-01A	-718.663	-891.317	-1609.98	0.932811
TCGA-EJ-7321-01A	-886.471	-20.1852	-906.656	0.890706
TCGA-EJ-7327-01A	78.3739	-333.303	-254.929	0.843212
TCGA-EJ-7328-01A	49.8477	840.395	890.243	0.741385
TCGA-EJ-7330-01A	-299.539	-442.359	-741.898	0.879453
TCGA-EJ-7331-01A	44.0872	-2.93488	41.1523	0.819059
TCGA-EJ-7781-01A	-509.574	-73.367	-582.941	0.868108
TCGA-EJ-7782-01A	-463.475	-368.219	-831.694	0.88565
TCGA-EJ-7783-01A	-517.456	-254.731	-772.187	0.88156
TCGA-EJ-7784-01A	-975.534	-582.334	-1557.87	0.930027
TCGA-EJ-7785-01A	-39.8932	177.818	137.925	0.810827
TCGA-EJ-7786-01A	-443.985	-541.09	-985.075	0.895879
TCGA-EJ-7788-01A	-92.6798	-302.422	-395.102	0.854093
TCGA-EJ-7789-01A	-756.946	-739.688	-1496.63	0.926686
TCGA-EJ-7791-01A	241.682	-98.0289	143.653	0.810334
TCGA-EJ-7792-01A	409.874	561.486	971.36	0.733342
TCGA-EJ-7793-01A	-982.019	-803.547	-1785.57	0.941788
TCGA-EJ-7794-01A	-211.646	77.6461	-134	0.833537
TCGA-EJ-7797-01A	-901.732	-293.642	-1195.37	0.909166
TCGA-EJ-8468-01A	179.206	325.042	504.248	0.778198
TCGA-EJ-8469-01A	-752.443	-614.849	-1367.29	0.919384
TCGA-EJ-8470-01A	-582.457	1307.76	725.3	0.757414
TCGA-EJ-8472-01A	-702.62	-797.514	-1500.13	0.926879
TCGA-EJ-8474-01A	-233.129	-468.927	-702.056	0.876654
TCGA-EJ-A46B-01A	-927.662	-841.267	-1768.93	0.940964
TCGA-EJ-A46D-01A	-832.749	-481.041	-1313.79	0.916266
TCGA-EJ-A46E-01A	-779.495	-245.308	-1024.8	0.898455
TCGA-EJ-A46F-01A	-1331.88	-878.224	-2210.1	0.960898
TCGA-EJ-A46G-01A	-263.337	-280.817	-544.154	0.865268
TCGA-EJ-A46H-01A	100.048	391.267	491.315	0.779389
TCGA-EJ-A46I-01A	-851.164	-588.079	-1439.24	0.923487
TCGA-EJ-A65B-01A	-245.35	-153.365	-398.716	0.854369
TCGA-EJ-A65D-01A	-1473.83	-1403.43	-2877.26	0.983368
TCGA-EJ-A65E-01A	-1156.22	-700.865	-1857.08	0.945266
TCGA-EJ-A65F-01A	-187.315	-170.949	-358.264	0.851269
TCGA-EJ-A65G-01A	-1015.7	-897.987	-1913.68	0.947944
TCGA-EJ-A65J-01A	-544.084	-451.062	-995.146	0.896535
TCGA-EJ-A65M-01A	-542.424	85.3351	-457.089	0.858791
TCGA-EJ-A6RA-01A	-806.622	-253.854	-1060.48	0.900742
TCGA-EJ-A6RC-01A	2.19835	669.407	671.605	0.762537
TCGA-EJ-A7NF-01A	-1421.04	-750.136	-2171.18	0.9593
TCGA-EJ-A7NG-01A	-414.049	-336.834	-750.883	0.88008
TCGA-EJ-A7NH-01A	-623.819	-545.276	-1169.09	0.907552
TCGA-EJ-A7NJ-01A	-1031.16	-122.539	-1153.7	0.906601
TCGA-EJ-A7NK-01A	-820.203	-543.655	-1363.86	0.919186
TCGA-EJ-A7NM-01A	-336.266	632.85	296.584	0.796977
TCGA-EJ-A7NN-01A	-455.721	121.925	-333.796	0.849378
TCGA-EJ-A8FN-01A	-394.893	114.194	-280.699	0.845239
TCGA-EJ-A8FO-01A	-811.707	-721.238	-1532.95	0.928676
TCGA-EJ-A8FP-01A	-354.019	11.4116	-342.607	0.85006
TCGA-EJ-A8FS-01A	-1396.74	-782.086	-2178.83	0.959617
TCGA-EJ-A8FU-01A	-103.881	-32.0178	-135.899	0.833691
TCGA-EJ-AB20-01A	373.152	482.946	856.097	0.744739
TCGA-EJ-AB27-01A	-916.812	264.595	-652.217	0.873111
TCGA-FC-7708-01A	83.2213	34.605	117.826	0.81255
TCGA-FC-7961-01A	182.224	-195.758	-13.5339	0.823638
TCGA-FC-A4JI-01A	-1553.9	-438.317	-1992.22	0.951552
TCGA-FC-A5OB-01A	-1139.36	-1015.03	-2154.39	0.958601
TCGA-FC-A66V-01A	-834.938	-53.5711	-888.51	0.889492
TCGA-FC-A6HD-01A	-1414.65	-610.649	-2025.3	0.953034
TCGA-FC-A8O0-01A	-954.049	-920.401	-1874.45	0.946094
TCGA-G9-6329-01A	-319.092	66.2521	-252.84	0.843047
TCGA-G9-6332-01A	-1289.25	-937.624	-2226.88	0.961577
TCGA-G9-6333-01A	-434.958	-206.598	-641.556	0.872347
TCGA-G9-6336-01A	-812.795	-489.207	-1302	0.915572
TCGA-G9-6338-01A	-185.52	-451.914	-637.435	0.872051
TCGA-G9-6339-01A	-941.935	-423.26	-1365.19	0.919263
TCGA-G9-6342-01A	-914.118	-615.07	-1529.19	0.928472
TCGA-G9-6343-01A	-740.056	-552.18	-1292.24	0.914995
TCGA-G9-6347-01A	72.8967	868.156	941.052	0.736359
TCGA-G9-6348-01A	-108.504	47.6946	-60.8089	0.827553
TCGA-G9-6351-01A	-947.483	-809.966	-1757.45	0.940392
TCGA-G9-6353-01A	-621.304	-727.157	-1348.46	0.918293
TCGA-G9-6354-01A	-1245.21	-593.29	-1838.5	0.944372
TCGA-G9-6356-01A	-192.096	304.829	112.733	0.812986
TCGA-G9-6361-01A	-170.519	-631.786	-802.306	0.883639
TCGA-G9-6362-01A	-542.155	-354.881	-897.036	0.890063
TCGA-G9-6363-01A	-456.629	-184.783	-641.412	0.872336
TCGA-G9-6364-01A	-100.926	-538.624	-639.549	0.872203
TCGA-G9-6365-01A	21.8314	-243.642	-221.811	0.840588
TCGA-G9-6366-01A	-949.897	-714.166	-1664.06	0.935642
TCGA-G9-6367-01A	-588.164	-407.411	-995.576	0.896563
TCGA-G9-6369-01A	-721.09	-783.808	-1504.9	0.927141
TCGA-G9-6370-01A	-313.52	-144.028	-457.549	0.858825
TCGA-G9-6371-01A	-1008.55	-743.653	-1752.2	0.94013
TCGA-G9-6373-01A	-184.637	53.9123	-130.725	0.833271
TCGA-G9-6377-01A	-642.508	-119.344	-761.852	0.880843
TCGA-G9-6378-01A	-119.914	-406.021	-525.935	0.863924
TCGA-G9-6379-01A	-284.081	1014.21	730.132	0.756951
TCGA-G9-6384-01A	-323.013	-254.133	-577.146	0.867686
TCGA-G9-6385-01A	-481.964	-492.74	-974.705	0.895202
TCGA-G9-6494-01A	-491.325	-710.492	-1201.82	0.909559
TCGA-G9-6496-01A	-365.365	-530.133	-895.498	0.88996
TCGA-G9-6498-01A	-174.442	803.379	628.937	0.766574
TCGA-G9-6499-01A	-1024.57	-305.702	-1330.27	0.917233
TCGA-G9-7509-01A	-730.498	-904.677	-1635.18	0.934137
TCGA-G9-7510-01A	-80.8935	-70.6099	-151.503	0.834953
TCGA-G9-7519-01A	-489.006	-581.108	-1070.11	0.901356
TCGA-G9-7521-01A	1.03199	716.786	717.818	0.758131
TCGA-G9-7522-01A	-384.465	-266.768	-651.234	0.87304
TCGA-G9-7523-01A	1049.61	754.214	1803.82	0.645005
TCGA-G9-7525-01A	-265.03	-472.494	-737.524	0.879147
TCGA-G9-A9S0-01A	-842.161	6.81527	-835.345	0.885899
TCGA-G9-A9S7-01A	-1333.73	-506.597	-1840.33	0.94446
TCGA-H9-7775-01A	-444.929	-619.37	-1064.3	0.900986
TCGA-H9-A6BX-01A	125.394	352.795	478.19	0.780595
TCGA-H9-A6BY-01A	-1091.15	-1039.75	-2130.89	0.957613
TCGA-HC-7075-01A	-1048.81	-267.167	-1315.98	0.916395
TCGA-HC-7077-01A	-1377.62	-1065.71	-2443.33	0.969813
TCGA-HC-7078-01A	-508.24	-31.3611	-539.601	0.864933
TCGA-HC-7079-01A	617.424	2956.38	3573.8	0.42704
TCGA-HC-7080-01A	-1141.45	-742.702	-1884.15	0.946554
TCGA-HC-7081-01A	840.819	410.184	1251	0.704825
TCGA-HC-7209-01A	-774.225	-372.595	-1146.82	0.906175
TCGA-HC-7210-01A	170.381	226.411	396.792	0.788007
TCGA-HC-7211-01A	-896.707	-109.461	-1006.17	0.897251
TCGA-HC-7212-01A	-520.413	-649.302	-1169.72	0.907591
TCGA-HC-7213-01A	-419.434	-54.0686	-473.503	0.860023
TCGA-HC-7230-01A	-1237.38	-898.009	-2135.39	0.957803
TCGA-HC-7231-01A	-796.305	111.326	-684.979	0.875445
TCGA-HC-7232-01A	-435.058	-640.332	-1075.39	0.901691
TCGA-HC-7233-01A	89.2539	639.319	728.573	0.7571
TCGA-HC-7736-01A	-309.724	-82.1091	-391.833	0.853844
TCGA-HC-7737-01A	-1.10846	487.633	486.525	0.779829
TCGA-HC-7738-01A	-1122.31	-555.076	-1677.38	0.93633
TCGA-HC-7740-01A	-172.087	-17.602	-189.689	0.838025
TCGA-HC-7742-01A	-409.154	-682.178	-1091.33	0.9027
TCGA-HC-7744-01A	-1070.34	-797.059	-1867.4	0.945758
TCGA-HC-7745-01A	119.809	489.361	609.17	0.768434
TCGA-HC-7747-01A	-500.593	380.673	-119.92	0.832393
TCGA-HC-7748-01A	30.4888	-3.23873	27.2501	0.820228
TCGA-HC-7749-01A	-322.347	-241.102	-563.45	0.866684
TCGA-HC-7750-01A	-362.708	-452.369	-815.077	0.884515
TCGA-HC-7752-01A	-738.362	-376.452	-1114.81	0.904178
TCGA-HC-7818-01A	-655.551	-64.8531	-720.404	0.877947
TCGA-HC-7819-01A	-1324.04	-935.426	-2259.47	0.962879
TCGA-HC-7820-01A	-1082.44	-723.826	-1806.26	0.942805
TCGA-HC-7821-01A	335.891	356.074	691.965	0.7606
TCGA-HC-8213-01A	-1455.89	-999.718	-2455.6	0.97025
TCGA-HC-8216-01A	-458.705	147.092	-311.613	0.847655
TCGA-HC-8256-01A	-1198.95	-633.073	-1832.03	0.944059
TCGA-HC-8257-01A	-590.968	-337.016	-927.984	0.892125
TCGA-HC-8258-01A	-905.186	-171.844	-1077.03	0.901795
TCGA-HC-8259-01A	-1213.76	-978.442	-2192.2	0.960167
TCGA-HC-8260-01A	-567.594	-360.701	-928.295	0.892145
TCGA-HC-8261-01A	-654.741	-25.3471	-680.089	0.875098
TCGA-HC-8262-01A	-1059.85	-742.465	-1802.32	0.942612
TCGA-HC-8265-01A	-698.386	-186.233	-884.619	0.889231
TCGA-HC-8266-01A	37.6861	1685.88	1723.57	0.653962
TCGA-HC-A48F-01A	-778.169	-1090.5	-1868.67	0.945819
TCGA-HC-A4ZV-01A	75.2352	500.39	575.626	0.771575
TCGA-HC-A631-01A	-904.268	-871.911	-1776.18	0.941324
TCGA-HC-A632-01A	190.699	903.51	1094.21	0.720964
TCGA-HC-A6AL-01A	-430.767	225.12	-205.648	0.839301
TCGA-HC-A6AN-01A	-556.362	-76.77	-633.132	0.871742
TCGA-HC-A6AO-01A	-914.738	469.193	-445.545	0.857921
TCGA-HC-A6AP-01A	-280.025	461.115	181.09	0.807102
TCGA-HC-A6AQ-01A	-973.275	-293.031	-1266.31	0.913452
TCGA-HC-A6AS-01A	7.71053	723.553	731.264	0.756842
TCGA-HC-A6HX-01A	-581.815	-108.095	-689.91	0.875795
TCGA-HC-A6HY-01A	-1258.88	-599.984	-1858.86	0.945351
TCGA-HC-A76W-01A	-9.85293	-136.682	-146.535	0.834552
TCGA-HC-A76X-01A	-1292.17	-1159.48	-2451.65	0.97011
TCGA-HC-A8CY-01A	-862.848	205.918	-656.93	0.873448
TCGA-HC-A8D0-01A	-244.235	185.017	-59.2187	0.827422
TCGA-HC-A8D1-01A	-231.484	-50.6065	-282.09	0.845348
TCGA-HC-A9TE-01A	150.055	984.804	1134.86	0.716816
TCGA-HC-A9TH-01A	-105	26.6621	-78.3379	0.828995
TCGA-HI-7168-01A	129.694	-710.177	-580.483	0.867929
TCGA-HI-7169-01A	-201.057	-450.547	-651.604	0.873067
TCGA-HI-7170-01A	262.327	322.894	585.221	0.770679
TCGA-HI-7171-01A	-612.921	-484.029	-1096.95	0.903055
TCGA-J4-8198-01A	-400.192	-734.939	-1135.13	0.905448
TCGA-J4-8200-01A	-311.11	-444.169	-755.279	0.880386
TCGA-J4-A67K-01A	-730.296	376.366	-353.93	0.850935
TCGA-J4-A67L-01A	-448.347	478.2	29.8531	0.820009
TCGA-J4-A67M-01A	-75.0368	726.466	651.429	0.764449
TCGA-J4-A67N-01A	-843.361	166.923	-676.438	0.874839
TCGA-J4-A67O-01A	-93.415	141.622	48.2068	0.818464
TCGA-J4-A67Q-01A	83.3716	412.246	495.617	0.778993
TCGA-J4-A67R-01A	-448.359	498.896	50.5373	0.818268
TCGA-J4-A67S-01A	-1016.06	17.1351	-998.925	0.896781
TCGA-J4-A67T-01A	-850.672	-216.365	-1067.04	0.90116
TCGA-J4-A6G1-01A	118.87	1954.13	2073	0.614314
TCGA-J4-A6G3-01A	-357.053	690.403	333.35	0.793706
TCGA-J4-A6M7-01A	-837.946	-1016.9	-1854.85	0.945158
TCGA-J4-A83I-01A	-504.354	-210.883	-715.236	0.877583
TCGA-J4-A83J-01A	-861.25	123.296	-737.954	0.879177
TCGA-J4-A83K-01A	-711.898	-701.296	-1413.19	0.922014
TCGA-J4-A83L-01A	-481.432	-612.159	-1093.59	0.902843
TCGA-J4-A83M-01A	-811.796	-297.589	-1109.39	0.903837
TCGA-J4-A83N-01A	-1180.29	-580.734	-1761.03	0.940571
TCGA-J4-AATV-01A	-396.448	200.359	-196.089	0.838537
TCGA-J4-AATZ-01A	-1145.14	-689.195	-1834.33	0.944171
TCGA-J4-AAU2-01A	-774.734	-445.105	-1219.84	0.910655
TCGA-J9-A52B-01A	-390.662	-84.3771	-475.039	0.860138
TCGA-J9-A52C-01A	424.261	680.745	1105.01	0.719864
TCGA-J9-A52D-01A	-1534.78	-1146.36	-2681.14	0.977732
TCGA-J9-A52E-01A	430.577	209.094	639.671	0.765561
TCGA-J9-A8CK-01A	181.609	-267.68	-86.0716	0.829629
TCGA-J9-A8CL-01A	408.517	301.033	709.551	0.758922
TCGA-J9-A8CM-01A	170.81	-67.4018	103.408	0.813782
TCGA-J9-A8CN-01A	-646.845	-448.851	-1095.7	0.902975
TCGA-J9-A8CP-01A	-191.015	-287.521	-478.536	0.860399
TCGA-KC-A4BL-01A	-420.7	53.2842	-367.416	0.851973
TCGA-KC-A4BN-01A	-1450.87	-749.081	-2199.96	0.960484
TCGA-KC-A4BR-01A	-17.6863	-300.136	-317.822	0.848139
TCGA-KC-A4BV-01A	7.19801	69.8197	77.0178	0.816027
TCGA-KC-A7F3-01A	-889.441	-438.874	-1328.31	0.917118
TCGA-KC-A7F5-01A	-1366.13	-1323.39	-2689.52	0.97799
TCGA-KC-A7F6-01A	-816.698	-394.059	-1210.76	0.910104
TCGA-KC-A7FA-01A	-655.811	-229.369	-885.18	0.889268
TCGA-KC-A7FD-01A	-1496.13	-728.984	-2225.11	0.961506
TCGA-KC-A7FE-01A	45.6474	-242.674	-197.027	0.838612
TCGA-KK-A59V-01A	-284.191	2123.32	1839.13	0.641036
TCGA-KK-A59X-01A	-355.953	-414.058	-770.01	0.881409
TCGA-KK-A59Y-01A	-1172.91	-700.557	-1873.47	0.946048
TCGA-KK-A59Z-01A	183.481	18.7319	202.213	0.805268
TCGA-KK-A5A1-01A	-114.906	-9.60076	-124.507	0.832766
TCGA-KK-A6DY-01A	-785.419	-34.207	-819.626	0.884826
TCGA-KK-A6E0-01A	-1050.8	-617.022	-1667.82	0.935837
TCGA-KK-A6E1-01A	-1108.31	-619.506	-1727.81	0.938904
TCGA-KK-A6E2-01A	-1144.93	-543.235	-1688.16	0.936885
TCGA-KK-A6E3-01A	-156.47	555.166	398.695	0.787835
TCGA-KK-A6E4-01A	-1071.29	-381.046	-1452.34	0.924223
TCGA-KK-A6E5-01A	-530.131	-266.505	-796.636	0.883249
TCGA-KK-A6E6-01A	-168.755	-120.564	-289.319	0.845915
TCGA-KK-A6E7-01A	-911.359	-614.365	-1525.72	0.928283
TCGA-KK-A6E8-01A	-1013.42	-846.497	-1859.92	0.945401
TCGA-KK-A7AP-01A	-1100.64	-1082.14	-2182.78	0.95978
TCGA-KK-A7AQ-01A	-470.976	-346.702	-817.678	0.884693
TCGA-KK-A7AU-01A	-1778.32	-1132.03	-2910.36	0.984239
TCGA-KK-A7AV-01A	-264.376	1036.23	771.855	0.752934
TCGA-KK-A7AW-01A	-768.499	700.969	-67.5301	0.828107
TCGA-KK-A7AY-01A	-868.63	-433.699	-1302.33	0.915591
TCGA-KK-A7AZ-01A	-838.155	-683.908	-1522.06	0.928083
TCGA-KK-A7B0-01A	-212.513	1018.43	805.917	0.749635
TCGA-KK-A7B1-01A	-112.289	-416.367	-528.656	0.864125
TCGA-KK-A7B2-01A	-33.632	1042.21	1008.58	0.729616
TCGA-KK-A7B3-01A	-52.3046	453.587	401.283	0.787601
TCGA-KK-A7B4-01A	-499.579	-12.1874	-511.767	0.862875
TCGA-KK-A8I4-01A	450.874	1156.99	1607.86	0.666716
TCGA-KK-A8I5-01A	-468.793	-555.844	-1024.64	0.898444
TCGA-KK-A8I6-01A	-976.162	-465.794	-1441.96	0.92364
TCGA-KK-A8I7-01A	-66.006	279.406	213.4	0.804293
TCGA-KK-A8I8-01A	-773.289	-460.789	-1234.08	0.911517
TCGA-KK-A8I9-01A	-44.4805	389.236	344.755	0.792686
TCGA-KK-A8IA-01A	-952.902	-798.243	-1751.15	0.940077
TCGA-KK-A8IB-01A	-341.453	498.196	156.743	0.809207
TCGA-KK-A8IC-01A	-29.2431	15.8459	-13.3971	0.823626
TCGA-KK-A8ID-01A	-1222.44	-678.131	-1900.57	0.947329
TCGA-KK-A8IF-01A	-928.734	-942.846	-1871.58	0.945958
TCGA-KK-A8IG-01A	189.919	-111.84	78.0793	0.815937
TCGA-KK-A8IH-01A	-900.88	-35.3562	-936.237	0.892671
TCGA-KK-A8II-01A	-1611.93	-956.011	-2567.94	0.974111
TCGA-KK-A8IJ-01A	-834.253	-721.369	-1555.62	0.929906
TCGA-KK-A8IK-01A	-1390.33	-863.478	-2253.81	0.962655
TCGA-KK-A8IL-01A	-385.137	768.61	383.474	0.789209
TCGA-KK-A8IM-01A	-395.309	-97.1562	-492.465	0.861439
TCGA-M7-A71Y-01A	-630.743	-397.621	-1028.36	0.898685
TCGA-M7-A71Z-01A	-1480.16	-1164.16	-2644.32	0.976584
TCGA-M7-A720-01A	-920.4	-415.358	-1335.76	0.917553
TCGA-M7-A721-01A	-596.056	-312.216	-908.273	0.890814
TCGA-M7-A722-01A	-1042.03	-435.48	-1477.51	0.925628
TCGA-M7-A723-01A	-0.505448	778.373	777.867	0.752353
TCGA-M7-A724-01A	-1679.03	-1102.89	-2781.91	0.98073
TCGA-M7-A725-01A	-993.844	-766.773	-1760.62	0.94055
TCGA-MG-AAMC-01A	-1223.88	-740.952	-1964.83	0.950308
TCGA-QU-A6IL-01A	-1032.54	-241.025	-1273.56	0.913885
TCGA-QU-A6IM-01A	-813.872	533.01	-280.862	0.845252
TCGA-QU-A6IN-01A	-1357.75	-819.147	-2176.9	0.959537
TCGA-QU-A6IO-01A	-864.63	236.588	-628.042	0.871375
TCGA-QU-A6IP-01A	-804.801	-588.233	-1393.03	0.920864
TCGA-SU-A7E7-01A	-564.293	74.0574	-490.236	0.861273
TCGA-TK-A8OK-01A	854.791	-62.9625	791.829	0.751002
TCGA-TP-A8TT-01A	-145.119	850.776	705.656	0.759294
TCGA-TP-A8TV-01A	-1102.34	-903.571	-2005.91	0.952168
TCGA-V1-A8MF-01A	-229.894	485.713	255.819	0.800577
TCGA-V1-A8MG-01A	-315.984	-145.642	-461.626	0.859132
TCGA-V1-A8MK-01A	-601.499	-417.928	-1019.43	0.898108
TCGA-V1-A8ML-01A	-366.62	-662.246	-1028.87	0.898717
TCGA-V1-A8MM-01A	-82.5693	286.629	204.059	0.805107
TCGA-V1-A8MU-01A	18.0152	432.473	450.488	0.78313
TCGA-V1-A8WL-01A	-408.038	276.749	-131.289	0.833317
TCGA-V1-A8WN-01A	-675.83	-404.01	-1079.84	0.901973
TCGA-V1-A8WS-01A	-1040.28	-996.325	-2036.6	0.953535
TCGA-V1-A8WV-01A	-427.655	354.058	-73.5966	0.828606
TCGA-V1-A8WW-01A	-526.594	-229.732	-756.326	0.880459
TCGA-V1-A8X3-01A	-439.132	-476.01	-915.142	0.891271
TCGA-V1-A9O5-01A	-482.839	675.091	192.252	0.806134
TCGA-V1-A9O7-01A	202.862	94.4547	297.317	0.796912
TCGA-V1-A9O9-01A	-255.874	1195.28	939.404	0.736523
TCGA-V1-A9OA-01A	-13.6855	-172.298	-185.983	0.837728
TCGA-V1-A9OF-01A	-1199.69	-565.103	-1764.79	0.940758
TCGA-V1-A9OH-01A	-445.041	-354.028	-799.069	0.883416
TCGA-V1-A9OL-01A	-493.698	-8.09997	-501.798	0.862134
TCGA-V1-A9OQ-01A	-524.272	-171.932	-696.205	0.87624
TCGA-V1-A9OT-01A	-689.259	-214.967	-904.227	0.890544
TCGA-V1-A9OX-01A	-649.558	48.8573	-600.7	0.869399
TCGA-V1-A9OY-01A	-431.82	-28.9375	-460.757	0.859066
TCGA-V1-A9Z7-01A	387.975	115.47	503.445	0.778272
TCGA-V1-A9Z8-01A	138.435	79.8379	218.273	0.803868
TCGA-V1-A9Z9-01A	-242.301	-386.991	-629.292	0.871465
TCGA-V1-A9ZG-01A	-110.191	-248.863	-359.054	0.851329
TCGA-V1-A9ZI-01A	34.4381	212.062	246.5	0.801396
TCGA-V1-A9ZK-01A	-516.864	-464.419	-981.284	0.895632
TCGA-V1-A9ZR-01A	290.147	682.265	972.412	0.733237
TCGA-VN-A88I-01A	680.69	312.535	993.224	0.731156
TCGA-VN-A88K-01A	-231.109	-440.883	-671.992	0.874522
TCGA-VN-A88L-01A	-304.044	-690.89	-994.934	0.896521
TCGA-VN-A88M-01A	-1162.07	-804.772	-1966.84	0.9504
TCGA-VN-A88N-01A	-1080.58	-750.03	-1830.61	0.94399
TCGA-VN-A88O-01A	-877.439	-196.467	-1073.91	0.901597
TCGA-VN-A88P-01A	-214.372	-268.694	-483.067	0.860738
TCGA-VN-A88Q-01A	-1171.85	-656.957	-1828.81	0.943903
TCGA-VN-A88R-01A	-311.318	-339.435	-650.753	0.873006
TCGA-VN-A943-01A	-1895.22	-1339.58	-3234.8	0.991542
TCGA-VP-A872-01A	-149.487	455.139	305.652	0.796173
TCGA-VP-A875-01A	-1306.17	-1190.92	-2497.09	0.971707
TCGA-VP-A876-01A	-1300.36	-971.436	-2271.8	0.963366
TCGA-VP-A878-01A	-165.616	-6.46601	-172.082	0.836612
TCGA-VP-A879-01A	-587.977	-863.317	-1451.29	0.924164
TCGA-VP-A87B-01A	-649.571	-534.568	-1184.14	0.908478
TCGA-VP-A87C-01A	523.886	1975.96	2499.84	0.563702
TCGA-VP-A87D-01A	-1131.96	-985.556	-2117.51	0.957046
TCGA-VP-A87E-01A	56.3808	838.032	894.413	0.740974
TCGA-VP-A87H-01A	-738.503	-498.946	-1237.45	0.91172
TCGA-VP-A87J-01A	-841.958	-746.471	-1588.43	0.931666
TCGA-VP-A87K-01A	-1203.59	-696.564	-1900.15	0.94731
TCGA-VP-AA1N-01A	-184.474	211.318	26.8435	0.820262
TCGA-WW-A8ZI-01A	-914.578	-419.13	-1333.71	0.917434
TCGA-X4-A8KQ-01A	-141.599	-12.6081	-154.207	0.835172
TCGA-X4-A8KS-01A	-779.385	4.11775	-775.267	0.881774
TCGA-XA-A8JR-01A	-568.921	-396.084	-965.005	0.894567
TCGA-XJ-A83F-01A	-722.853	-793.336	-1516.19	0.927761
TCGA-XJ-A83G-01A	-1109.36	-631.207	-1740.57	0.939547
TCGA-XJ-A83H-01A	-1086	-438.956	-1524.95	0.92824
TCGA-XJ-A9DI-01A	-25.2946	832.991	807.697	0.749462
TCGA-XJ-A9DK-01A	-658.13	-241.985	-900.115	0.890269
TCGA-XJ-A9DQ-01A	-830.839	-623.073	-1453.91	0.924311
TCGA-XJ-A9DX-01A	-756.412	-520.156	-1276.57	0.914064
TCGA-XK-AAIR-01A	-462.585	-17.7295	-480.314	0.860532
TCGA-XK-AAIV-01A	239.078	1454.71	1693.79	0.657263
TCGA-XK-AAIW-01A	-1284.59	73.1086	-1211.48	0.910148
TCGA-XK-AAJA-01A	-1111.42	-649.965	-1761.38	0.940589
TCGA-XK-AAJP-01A	-658.821	-280.023	-938.844	0.892844
TCGA-XK-AAJR-01A	-491.091	-562.448	-1053.54	0.900299
TCGA-XK-AAJT-01A	-82.2828	-2.68703	-84.9698	0.829539
TCGA-XK-AAJU-01A	-859.402	-164.481	-1023.88	0.898396
TCGA-XQ-A8TA-01A	-1776.49	-1469.48	-3245.97	0.991753
TCGA-XQ-A8TB-01A	-79.8254	-511.6	-591.425	0.868726
TCGA-Y6-A8TL-01A	-628.652	-672.617	-1301.27	0.915529
TCGA-Y6-A9XI-01A	-1067.32	-701.006	-1768.33	0.940934
TCGA-YJ-A8SW-01A	-888.546	-972.04	-1860.59	0.945433
TCGA-YL-A8HJ-01A	555.849	487.078	1042.93	0.72616
TCGA-YL-A8HK-01A	-171.093	-86.3645	-257.458	0.843411
TCGA-YL-A8HL-01A	-1046.55	-1046.25	-2092.8	0.955988
TCGA-YL-A8HM-01A	-538.926	409.144	-129.782	0.833194
TCGA-YL-A8HO-01A	442.898	964.071	1406.97	0.688401
TCGA-YL-A8S8-01A	-289.049	-569.101	-858.15	0.887447
TCGA-YL-A8S9-01A	-1519.45	-1283.4	-2802.85	0.981325
TCGA-YL-A8SA-01A	-1381.16	-819.131	-2200.29	0.960498
TCGA-YL-A8SB-01A	-8.53735	-174.643	-183.181	0.837503
TCGA-YL-A8SC-01A	-340.734	252.014	-88.7203	0.829846
TCGA-YL-A8SI-01A	-93.051	14.1819	-78.8691	0.829039
TCGA-YL-A9WH-01A	-776.709	-570.722	-1347.43	0.918233
TCGA-YL-A9WI-01A	-695.265	-735.735	-1431	0.923022
TCGA-YL-A9WJ-01A	-153.913	185.625	31.7119	0.819853
TCGA-YL-A9WK-01A	109.069	121.766	230.835	0.802769
TCGA-YL-A9WL-01A	-938.263	-1006.79	-1945.05	0.9494
TCGA-YL-A9WX-01A	-380.621	215.001	-165.62	0.836092
TCGA-YL-A9WY-01A	380.709	1141.87	1522.58	0.675994
TCGA-ZG-A8QW-01A	-181.624	375.989	194.365	0.80595
TCGA-ZG-A8QX-01A	-780.208	-416.524	-1196.73	0.909249
TCGA-ZG-A8QY-01A	-249.803	-657.725	-907.528	0.890764
TCGA-ZG-A8QZ-01A	19.851	288.412	308.263	0.795941
TCGA-ZG-A9KY-01A	-706.819	682.604	-24.2154	0.824526
TCGA-ZG-A9L0-01A	421.841	751.948	1173.79	0.71282
TCGA-ZG-A9L1-01A	-394.845	-1121.35	-1516.19	0.927761
TCGA-ZG-A9L2-01A	628.865	720.993	1349.86	0.694457
TCGA-ZG-A9L4-01A	243.97	-11.0569	232.913	0.802587
TCGA-ZG-A9L5-01A	-733.108	-599.044	-1332.15	0.917343
TCGA-ZG-A9L6-01A	190.649	128.122	318.771	0.795006
TCGA-ZG-A9L9-01A	508.827	575.08	1083.91	0.722011
TCGA-ZG-A9LB-01A	-314.532	346.675	32.1423	0.819817
TCGA-ZG-A9LM-01A	-66.7581	-29.0558	-95.8139	0.830427
TCGA-ZG-A9LN-01A	333.819	1654.07	1987.89	0.624124
TCGA-ZG-A9LS-01A	521.979	1118.53	1640.51	0.663136
TCGA-ZG-A9LU-01A	-755.128	392.802	-362.326	0.851581
TCGA-ZG-A9LY-01A	-253.978	-20.0325	-274.011	0.844714
TCGA-ZG-A9LZ-01A	-513.311	80.6131	-432.698	0.856951
TCGA-ZG-A9M4-01A	-671.63	815.037	143.408	0.810355
TCGA-ZG-A9MC-01A	307.282	1778.01	2085.29	0.61289
TCGA-ZG-A9N3-01A	-990.106	426.096	-564.01	0.866725
TCGA-ZG-A9ND-01A	-1100.67	-645.109	-1745.78	0.939809
TCGA-ZG-A9NI-01A	199.912	-322.07	-122.158	0.832575

## Sheet: type28_ssGSEA_res
sample	Activated_B_cell	Activated_CD4_T_cell	Activated_CD8_T_cell	Activated_dendritic_cell	CD56bright_natural_killer_cell	CD56dim_natural_killer_cell	Central_memory_CD4_T_cell	Central_memory_CD8_T_cell	Effector_memeory_CD4_T_cell	Effector_memeory_CD8_T_cell	Eosinophil	Gamma_delta_T_cell	Immature_B_cell	Immature_dendritic_cell	Macrophage	Mast_cell	MDSC	Memory_B_cell	Monocyte	Natural_killer_cell	Natural_killer_T_cell	Neutrophil	Plasmacytoid_dendritic_cell	Regulatory_T_cell	T_follicular_helper_cell	Type_1_T_helper_cell	Type_17_T_helper_cell	Type_2_T_helper_cell
TCGA-2A-A8VL-01A	-0.280504	-0.115558	0.18297	0.117358	0.299161	0.269524	0.463846	0.165489	0.0495787	0.0348429	-0.0467882	0.157082	-0.0928581	0.337737	-0.0788469	0.0152187	0.0154993	-0.0556912	0.430929	0.258856	-0.0356776	-0.278393	0.36496	-0.125688	0.0421894	0.0310667	-0.039523	0.00549153
TCGA-2A-A8VO-01A	-0.230549	-0.0519703	0.187345	0.177435	0.331589	0.297014	0.489124	0.211527	0.0909798	0.0953266	-0.0926421	0.18458	-0.138266	0.294652	-0.033762	0.0255206	0.125421	-0.0428063	0.399238	0.276756	0.00254157	-0.233023	0.34914	-0.0310094	0.0920674	0.0446542	-0.0817379	-0.0295509
TCGA-2A-A8VT-01A	-0.305768	-0.089337	0.185919	0.140404	0.309299	0.287325	0.466604	0.176064	0.0642929	0.077939	-0.0977225	0.139909	-0.120468	0.329519	-0.0951244	-0.128902	0.0742525	-0.0244927	0.394069	0.262096	-0.0381589	-0.27245	0.36157	-0.0265843	0.0575584	0.0260332	-0.132137	-0.0508608
TCGA-2A-A8VV-01A	-0.304648	-0.114595	0.182868	0.0727282	0.314074	0.268407	0.457148	0.170296	0.0569156	0.0199742	-0.159616	0.153692	-0.183612	0.318703	-0.0647025	-0.0571541	-0.0228569	-0.0258915	0.418719	0.246933	-0.0458737	-0.236341	0.370002	-0.0725645	0.0610275	0.0252704	-0.124432	-0.0253477
TCGA-2A-A8VX-01A	-0.37421	-0.0560204	0.136945	0.0730529	0.300649	0.189702	0.455412	0.180438	0.0947821	-0.0539817	-0.153271	0.17223	-0.129216	0.253119	-0.111413	0.012459	-0.0387977	-0.0208908	0.409201	0.204666	-0.0597056	-0.366959	0.358043	-0.112362	0.0222521	-0.0305241	-0.117376	-0.00379984
TCGA-2A-A8W1-01A	-0.382737	-0.0546425	0.18259	0.12184	0.302987	0.199124	0.409932	0.190049	0.0830157	0.0156049	-0.08537	0.168934	-0.203687	0.322192	-0.0538134	-0.0670615	0.0615185	-0.0263363	0.401298	0.14656	-0.0666311	-0.197777	0.327047	-0.051218	0.0622081	-0.0276389	-0.125505	0.0284009
TCGA-2A-A8W3-01A	-0.29331	-0.0507524	0.176343	0.164229	0.339975	0.297059	0.464282	0.202132	0.0882655	0.0995512	-0.0875709	0.168891	-0.170867	0.331004	-0.0648603	0.0128533	0.0898198	-0.00261532	0.396679	0.262124	-0.014704	-0.256726	0.380723	-0.0338001	0.0747782	0.0267071	-0.131067	-0.0281723
TCGA-2A-AAYF-01A	-0.266627	-0.0915508	0.186078	0.134647	0.310475	0.277016	0.459178	0.211808	0.061033	0.0379109	-0.104857	0.188694	-0.156986	0.315703	-0.0531407	-0.036459	0.071207	-0.0207244	0.412111	0.21558	-0.0559431	-0.211546	0.350894	-0.0522609	0.056176	0.0105599	-0.0809598	-0.0318542
TCGA-2A-AAYO-01A	0.0295076	0.0848618	0.340541	0.209219	0.334546	0.277543	0.530557	0.26792	0.0931031	0.140065	-0.0669096	0.219259	0.132134	0.320787	0.0490872	0.129855	0.298444	-0.0483274	0.409733	0.292505	0.0214195	-0.23867	0.377285	0.0535127	0.14574	0.0967869	-0.0820676	0.00756523
TCGA-2A-AAYU-01A	-0.293252	-0.125417	0.161886	0.118471	0.322936	0.240853	0.448294	0.175653	0.101591	0.0269015	-0.0295492	0.15961	-0.158149	0.310048	-0.0868933	-0.013558	0.0243518	-0.00597267	0.402469	0.259303	-0.0553645	-0.263804	0.351683	-0.0332339	0.079875	-0.00737331	-0.14213	-0.0123773
TCGA-4L-AA1F-01A	-0.0463593	0.125291	0.339137	0.223452	0.380621	0.355549	0.568161	0.343376	0.150216	0.277275	-0.0497925	0.297366	0.110035	0.37479	0.107028	0.0826603	0.4288	0.0943186	0.411767	0.399703	0.13197	-0.189872	0.422649	0.25518	0.170633	0.197137	-0.0427424	0.101104
TCGA-CH-5737-01A	-0.266505	-0.0445727	0.172971	0.153862	0.342305	0.278176	0.461419	0.2223	0.0673049	0.0275053	-0.0372687	0.183876	-0.135511	0.300156	-0.0496215	-0.010926	0.0738873	-0.0304719	0.453252	0.278166	-0.0473762	-0.203169	0.34337	-0.0340069	0.113929	0.0282913	-0.103923	0.0457399
TCGA-CH-5738-01A	-0.201967	0.0812758	0.231728	0.264605	0.349757	0.278403	0.52511	0.33103	0.108355	0.178107	0.0822584	0.209578	0.0192481	0.383192	0.0900056	0.167058	0.323232	0.0552813	0.394589	0.329247	0.0497926	-0.143043	0.417179	0.140304	0.190533	0.131675	-0.0717254	0.0907052
TCGA-CH-5739-01A	-0.213347	0.0233908	0.230193	0.190745	0.308877	0.232305	0.470151	0.251048	0.0959271	0.155311	-0.0168913	0.163004	-0.0596604	0.358714	-0.0211801	0.0425368	0.197044	0.0269488	0.411852	0.273095	0.00359698	-0.206224	0.371682	0.0361022	0.133981	0.0819599	-0.0856762	0.0493918
TCGA-CH-5740-01A	-0.165375	-0.0212594	0.233135	0.157145	0.326104	0.232071	0.457264	0.235605	0.159917	0.107029	-0.0942086	0.160238	-0.0546447	0.324945	-0.0437548	-0.04774	0.118435	0.00504107	0.416725	0.259238	-0.0548948	-0.255485	0.361842	-0.0064585	0.0696869	0.040923	-0.102278	0.051972
TCGA-CH-5741-01A	-0.352716	-0.0849363	0.160485	0.143784	0.330464	0.264437	0.443192	0.215224	0.0809469	0.0620863	-0.0633518	0.113865	-0.183586	0.353646	-0.05869	-0.00593402	0.0327157	-0.0160822	0.439079	0.224765	-0.0494892	-0.218645	0.335946	-0.0443419	0.0602965	0.0105151	-0.133181	0.0415657
TCGA-CH-5743-01A	-0.162145	0.0945742	0.282959	0.249043	0.356407	0.314106	0.527042	0.289692	0.122147	0.25408	0.0309352	0.165448	-0.0211786	0.391028	0.0217578	0.105253	0.302557	0.0811973	0.410183	0.377588	0.0477934	-0.178776	0.405501	0.0406825	0.139168	0.124009	-0.0231739	0.0877867
TCGA-CH-5744-01A	-0.268829	-0.0398821	0.190698	0.153683	0.326221	0.295588	0.465897	0.228157	0.0666737	0.0843479	0.0835948	0.149595	-0.10679	0.341121	-0.0280049	0.0642517	0.151278	-0.0303207	0.436883	0.265064	-0.019973	-0.166548	0.379186	0.0471654	0.120468	0.0487646	-0.0716212	0.050782
TCGA-CH-5745-01A	-0.200259	-0.0264912	0.274153	0.223002	0.317414	0.247763	0.49521	0.250469	0.0809745	0.133911	-0.0178816	0.170685	-0.0400219	0.328401	0.0222039	0.125037	0.247469	0.0133129	0.411992	0.312843	0.00125173	-0.222831	0.382782	0.0371193	0.13717	0.0832818	-0.0435536	0.0228029
TCGA-CH-5746-01A	-0.270765	-0.0878526	0.154637	0.159963	0.331548	0.281342	0.4596	0.20582	0.0548394	0.0636408	-0.0689444	0.142567	-0.163621	0.361278	-0.0664576	-0.0602153	0.0456562	0.0293626	0.424677	0.274152	-0.0444066	-0.237042	0.367354	-0.0747022	0.0403549	0.0108124	-0.110362	0.0338732
TCGA-CH-5748-01A	-0.217845	-0.0408825	0.197958	0.162106	0.313036	0.270568	0.460757	0.203174	0.0653497	0.0501179	-0.165656	0.194876	-0.0746755	0.321752	-0.0641255	-0.0927599	0.0314649	0.012432	0.416731	0.241464	-0.0583748	-0.278699	0.354242	-0.0402574	0.0547616	0.0182582	-0.117217	0.0215046
TCGA-CH-5750-01A	-0.0569841	0.160434	0.309776	0.218716	0.305853	0.264672	0.495366	0.255796	0.0908595	0.146712	0.0153002	0.209819	0.0456666	0.328359	-0.0303521	0.00413366	0.220566	-0.00779256	0.424232	0.276447	-0.00251354	-0.25165	0.364926	0.0400422	0.112098	0.0650919	-0.114538	0.0240178
TCGA-CH-5751-01A	0.169147	0.273587	0.442154	0.264213	0.299646	0.257384	0.567599	0.305025	0.148104	0.249627	-0.0862611	0.233833	0.242076	0.316973	0.00768583	-0.0352562	0.373899	0.0631925	0.384217	0.287996	0.0415871	-0.298038	0.381986	0.152574	0.173448	0.127809	-0.138659	0.0686308
TCGA-CH-5752-01A	-0.31104	0.0150055	0.148261	0.13512	0.278399	0.229909	0.421072	0.235232	0.124138	0.0780899	-0.0802648	0.156048	-0.158742	0.322314	-0.116436	-0.0593527	0.0785308	0.0135065	0.384069	0.227091	-0.0255377	-0.206167	0.35884	0.0207954	0.0563426	0.00945706	-0.15973	0.00675423
TCGA-CH-5753-01A	-0.277481	0.0407992	0.220915	0.203088	0.28669	0.249929	0.456953	0.249932	0.0960667	0.127917	0.0361518	0.142406	0.0451501	0.296874	-0.0331156	0.0100463	0.165717	-0.034296	0.360545	0.283623	-0.0170827	-0.243595	0.329366	0.00755487	0.0775089	0.0330113	-0.10625	0.0522665
TCGA-CH-5754-01A	-0.0959619	0.145169	0.32834	0.205597	0.336195	0.324102	0.519359	0.255721	0.0479114	0.169592	-0.0673675	0.230472	0.0509037	0.306097	0.00224615	0.094668	0.294025	0.00892066	0.380857	0.283705	0.0197952	-0.185	0.36949	0.142779	0.15548	0.0813332	-0.0785092	0.0737595
TCGA-CH-5761-01A	-0.329824	0.0574171	0.127026	0.136575	0.328441	0.308488	0.471375	0.249227	0.0750925	0.0356161	-0.0874919	0.235414	-0.135111	0.303146	-0.0329391	-0.0173475	0.131897	0.0466646	0.382848	0.289346	-0.0215418	-0.334072	0.376165	0.0757216	0.0882971	-0.00210719	-0.0555949	0.0621483
TCGA-CH-5762-01A	-0.119268	0.110487	0.265862	0.236616	0.340193	0.269658	0.508934	0.261047	0.104279	0.144486	0.0692131	0.171917	0.0363135	0.344353	-0.00679008	0.108602	0.226536	0.0373126	0.373909	0.342502	0.012726	-0.249013	0.38304	0.0535231	0.134134	0.101758	-0.0885521	0.0642074
TCGA-CH-5763-01A	-0.21279	-0.00867451	0.182062	0.167944	0.340399	0.265908	0.503509	0.265594	0.104907	0.108107	0.0580918	0.1703	-0.0697429	0.391882	-0.00853806	0.117124	0.178451	0.039536	0.390064	0.344856	0.0544303	-0.203096	0.389067	0.0341892	0.137022	0.0906203	-0.0619087	0.0794535
TCGA-CH-5764-01A	-0.242024	0.0147437	0.250282	0.199547	0.324463	0.251571	0.467356	0.224014	0.100101	0.117269	-0.0033895	0.150244	-0.0707569	0.320398	-0.041671	0.023914	0.149531	0.0294336	0.412441	0.302291	-0.0174011	-0.203477	0.372082	0.0202308	0.0926719	0.0503335	-0.100703	0.0446415
TCGA-CH-5765-01A	-0.278297	-0.079226	0.146782	0.109744	0.32999	0.253692	0.440313	0.210013	0.0845416	0.0500806	-0.0484683	0.141258	-0.137293	0.348491	-0.0541445	-0.022737	0.0491385	0.0218458	0.398544	0.248322	-0.0301082	-0.243591	0.376205	-0.033999	0.0672589	0.0138291	-0.116725	0.0238887
TCGA-CH-5766-01A	-0.197159	0.0779656	0.25185	0.183771	0.33342	0.287974	0.490034	0.217515	0.0880156	0.0925911	0.055576	0.17376	-0.0413611	0.364651	-0.0456321	0.0474191	0.176068	-0.0147989	0.392407	0.297016	-0.0152872	-0.239365	0.342562	0.0278047	0.117435	0.0572663	-0.0795449	0.0272336
TCGA-CH-5767-01A	-0.289483	-0.0504853	0.155828	0.116324	0.296513	0.241234	0.442357	0.211921	0.0777611	0.0549072	-0.0704383	0.188512	-0.148194	0.328613	-0.090496	0.0123563	0.0554057	-0.0258169	0.411224	0.23139	-0.0330149	-0.199111	0.328447	-0.0275118	0.0915081	0.0378491	-0.0756797	0.0725132
TCGA-CH-5768-01A	-0.237354	-0.0160138	0.192467	0.16957	0.31951	0.227646	0.448469	0.228303	0.0696593	0.0540421	-0.088705	0.217192	-0.123442	0.347596	-0.0490264	-0.0567505	0.0769592	0.0509403	0.398641	0.235067	-0.0345219	-0.250503	0.353286	-0.0167889	0.0561467	0.0253599	-0.0989562	0.0422776
TCGA-CH-5769-01A	-0.273132	0.0860297	0.185715	0.190187	0.339671	0.260532	0.497413	0.24688	0.068286	0.0994756	-0.0110148	0.197323	-0.0771587	0.339987	-0.0465131	0.0641504	0.161504	0.0778021	0.407445	0.316546	0.000867849	-0.215863	0.362233	0.0107599	0.0947019	0.0409395	-0.123806	0.068484
TCGA-CH-5771-01A	-0.164617	-0.00298251	0.24853	0.226252	0.339385	0.306536	0.526293	0.273476	0.0931359	0.167834	-0.017451	0.182275	0.00259093	0.370594	0.0436684	0.0828059	0.306842	0.0467801	0.431086	0.352169	0.0496873	-0.252194	0.411856	0.115624	0.15848	0.110769	-0.0655992	0.0604709
TCGA-CH-5772-01A	-0.250756	-0.0227094	0.223082	0.144708	0.307466	0.229964	0.463135	0.266354	0.102628	0.0956342	-0.0962535	0.185111	-0.0464495	0.324542	0.00149228	0.0844616	0.119099	-0.0309978	0.393804	0.277952	0.00708784	-0.192121	0.327919	-0.0211392	0.0868251	0.0362961	-0.0760135	0.046337
TCGA-CH-5788-01A	-0.274807	0.0550473	0.138555	0.149703	0.269625	0.210477	0.440896	0.267715	0.0646771	0.000526836	-0.171127	0.224749	-0.0985479	0.289222	-0.123301	-0.136233	0.0699007	0.0746143	0.363886	0.201522	-0.0383933	-0.188733	0.334892	0.0211216	0.0339664	0.0115942	-0.115537	0.0626416
TCGA-CH-5789-01A	-0.222595	-0.0405984	0.163548	0.188842	0.32781	0.285242	0.51062	0.26853	0.0937018	0.112022	0.0534883	0.17846	-0.0560351	0.395506	0.00691287	0.15721	0.20825	0.0323911	0.426691	0.304774	0.00575574	-0.132088	0.400721	0.0409512	0.143583	0.0908646	-0.0482294	0.0676394
TCGA-CH-5790-01A	-0.287338	-0.0854995	0.181369	0.183849	0.316575	0.228468	0.476726	0.235442	0.0741709	0.0806652	-0.0381544	0.149438	-0.126997	0.319085	-0.0197586	-0.015942	0.129936	-0.0113935	0.428519	0.257498	-0.0309603	-0.224593	0.357011	0.0164804	0.0888836	0.0310888	-0.128123	-0.0212317
TCGA-CH-5791-01A	-0.248988	-0.0749395	0.141727	0.194317	0.356501	0.251139	0.476836	0.228621	0.126657	0.0979354	-0.144072	0.181988	-0.103406	0.313431	0.0111525	0.0078794	0.159179	0.0102596	0.370481	0.265097	-0.0210846	-0.231235	0.362521	0.0221072	0.100991	0.0303468	-0.102863	0.0553418
TCGA-CH-5792-01A	-0.0869447	0.0239945	0.278395	0.254258	0.347146	0.304545	0.542909	0.273574	0.0812397	0.19003	-0.0992075	0.218839	0.00564067	0.325934	0.0605917	0.0769555	0.334019	0.0621121	0.449083	0.353736	0.0452702	-0.200857	0.406372	0.128467	0.155311	0.112765	-0.0662425	0.0537662
TCGA-CH-5794-01A	-0.318372	-0.0531014	0.164117	0.170151	0.334165	0.255361	0.450867	0.214775	0.0610957	0.0604593	0.00895265	0.13262	-0.116874	0.319798	-0.0349024	-0.0673496	0.112877	0.00595327	0.446182	0.267514	-0.0469614	-0.202076	0.358039	0.00773495	0.0651356	0.0100489	-0.115535	0.050307
TCGA-EJ-5494-01A	-0.251714	0.00817097	0.204753	0.177466	0.332329	0.242384	0.517362	0.265303	0.0647976	0.110684	-0.0272429	0.177026	-0.14329	0.323951	-0.0198522	0.0754446	0.16664	0.0020744	0.409782	0.281112	0.00988017	-0.300749	0.329894	0.00192569	0.105906	0.0557672	-0.129181	0.00527982
TCGA-EJ-5495-01A	-0.154833	0.0660978	0.236487	0.185944	0.333417	0.276477	0.498221	0.275137	0.146696	0.169963	-0.136664	0.180473	-0.0223532	0.36076	-0.000708355	0.0808654	0.216391	0.0698829	0.372949	0.311023	0.0423457	-0.231018	0.395102	0.0884643	0.127342	0.103815	-0.0821376	0.109519
TCGA-EJ-5496-01A	-0.265424	-0.0581375	0.18749	0.138235	0.318674	0.235668	0.449449	0.197609	0.0813928	0.0780812	-0.132688	0.15927	-0.144855	0.360191	-0.0737058	-0.0706433	0.0226001	0.00274772	0.432599	0.248893	-0.0399658	-0.260043	0.346152	-0.0399778	0.0476384	-0.00129177	-0.112752	0.0176639
TCGA-EJ-5497-01A	-0.230341	0.000475509	0.193391	0.181237	0.323526	0.253211	0.488469	0.244804	0.110724	0.11724	-0.0337696	0.161781	-0.0841391	0.352588	-0.0468846	0.0590053	0.1075	0.0407303	0.419205	0.288534	-0.0208809	-0.207584	0.37487	0.0240806	0.104758	0.056362	-0.0765305	0.0455472
TCGA-EJ-5498-01A	-0.168641	0.0456133	0.215554	0.220921	0.328441	0.252805	0.512919	0.273406	0.131391	0.167742	-0.0519612	0.16432	-0.0708961	0.374245	0.0012227	0.0928218	0.227624	0.0397267	0.409781	0.365188	0.0541042	-0.201185	0.378036	0.0583077	0.12821	0.0879575	-0.0729133	0.0906194
TCGA-EJ-5499-01A	-0.160992	0.0666065	0.2597	0.222158	0.361728	0.263341	0.509309	0.233606	0.116495	0.113379	-0.146813	0.201596	-0.0559007	0.388071	-0.0160072	0.0158551	0.191611	0.114007	0.428925	0.31173	-0.000957813	-0.243641	0.380955	0.016587	0.104769	0.0576272	-0.0845359	0.0893474
TCGA-EJ-5501-01A	-0.269405	-0.0674666	0.20001	0.166791	0.35353	0.29833	0.486531	0.220358	0.0747414	0.0402722	-0.0862781	0.169638	-0.149789	0.350116	-0.0847493	-0.0315609	0.12604	0.0441384	0.43204	0.289753	-0.0211515	-0.240248	0.385594	-0.00941848	0.0687293	0.0355003	-0.119574	0.0349695
TCGA-EJ-5502-01A	-0.200946	-0.0372608	0.207662	0.232196	0.349288	0.288098	0.508693	0.252859	0.098818	0.156863	-0.109595	0.171044	-0.0788429	0.339765	-0.00276941	0.0278782	0.282562	-0.0103647	0.432895	0.354425	0.00339713	-0.202225	0.403126	0.0153367	0.128376	0.0930023	-0.0607775	0.05291
TCGA-EJ-5503-01A	-0.136693	-0.0342667	0.202104	0.223055	0.330559	0.309509	0.507064	0.232087	0.0724674	0.119194	-0.075417	0.163361	-0.0737853	0.358458	-0.00909235	0.0613046	0.174665	-0.000554554	0.431873	0.337748	-0.0166025	-0.194965	0.378995	-0.00365766	0.0935128	0.0583177	-0.078448	0.0310535
TCGA-EJ-5504-01A	-0.251383	-0.030233	0.187075	0.165245	0.328369	0.251983	0.494596	0.250481	0.0651511	0.0762839	-0.0934113	0.224052	-0.0750579	0.33273	-0.0109531	0.0197841	0.162495	0.0286613	0.434969	0.293757	-0.0025918	-0.257238	0.372342	0.0437304	0.108439	0.0515064	-0.112639	0.042932
TCGA-EJ-5505-01A	-0.279561	-0.0531676	0.174466	0.146305	0.338644	0.242639	0.466173	0.237582	0.0843474	0.0435974	-0.201555	0.214808	-0.129822	0.353048	-0.0661658	0.0327491	0.045136	0.00651013	0.421341	0.237023	-0.0538866	-0.230932	0.348148	-0.0621322	0.0466751	-0.00805062	-0.096482	0.0274522
TCGA-EJ-5506-01A	-0.30373	-0.058515	0.185004	0.154354	0.326879	0.269172	0.463815	0.233098	0.117391	0.118275	-0.0897232	0.148461	-0.112892	0.365879	-0.060766	-0.0221668	0.0742504	-0.00842541	0.403734	0.297543	-0.059052	-0.290206	0.351923	-0.0509345	0.0517522	0.0138293	-0.0758684	0.0333195
TCGA-EJ-5507-01A	-0.252321	0.0389145	0.220939	0.192597	0.338086	0.285872	0.481828	0.205634	0.0766487	0.0994305	-0.129408	0.191098	-0.106589	0.32078	-0.0593152	-0.0437301	0.150116	0.0278586	0.439423	0.293762	-0.0227003	-0.266697	0.38131	0.0189691	0.0840232	0.0425788	-0.0733076	0.0783593
TCGA-EJ-5508-01A	-0.177622	0.0536811	0.248991	0.238367	0.34796	0.25491	0.501472	0.241749	0.118631	0.147451	-0.0749812	0.184377	-0.0165509	0.358381	-0.000274519	0.0502	0.207311	0.0419738	0.405076	0.338182	0.0122723	-0.201268	0.376407	0.0674492	0.107052	0.0615697	-0.106835	0.0728525
TCGA-EJ-5509-01A	-0.174814	0.00573559	0.237276	0.237376	0.335183	0.29557	0.517072	0.262748	0.0800366	0.122282	-0.132809	0.256855	-0.0406104	0.314444	0.0222704	0.0195092	0.243147	0.0220396	0.444533	0.336646	0.0277899	-0.266662	0.387868	0.0618668	0.130129	0.0684264	-0.0592955	0.0513877
TCGA-EJ-5510-01A	-0.242742	-0.0231003	0.236816	0.219586	0.355744	0.296152	0.500824	0.221659	0.0862232	0.118946	-0.0795084	0.180305	-0.0523699	0.338543	-0.0421036	0.0633458	0.195923	0.0281181	0.417389	0.30273	-0.0344125	-0.274263	0.375212	-0.0180643	0.0915144	0.0420609	-0.0888443	0.0402295
TCGA-EJ-5511-01A	-0.25261	-0.129967	0.148484	0.14131	0.314019	0.258798	0.451066	0.227997	0.0683869	0.0545183	-0.143915	0.15751	-0.116008	0.297977	-0.0503269	-0.0302209	0.0972875	0.0120442	0.377432	0.284518	-0.0347899	-0.28746	0.376383	0.00207872	0.059643	0.026771	-0.109978	-0.0200891
TCGA-EJ-5512-01A	-0.222275	-0.0797106	0.191955	0.138117	0.334989	0.241001	0.484413	0.195158	0.0694944	0.059125	-0.12071	0.189726	-0.131977	0.358605	-0.0571373	-0.0203347	0.0602012	-0.000182575	0.392933	0.291703	-0.0256278	-0.243105	0.360331	-0.0449722	0.0602769	0.0321473	-0.0863532	0.0315522
TCGA-EJ-5514-01A	-0.249645	0.0687753	0.195356	0.220855	0.323962	0.232524	0.484049	0.267098	0.112252	0.121728	-0.0333657	0.203057	-0.053915	0.317194	0.00954682	0.0576119	0.228385	0.0754663	0.420997	0.291751	0.0212157	-0.212654	0.388217	0.0778065	0.14569	0.0645267	-0.0694202	0.103155
TCGA-EJ-5515-01A	-0.244768	-0.0737177	0.173611	0.15422	0.324277	0.249326	0.486976	0.210908	0.0935303	0.0604571	-0.0860587	0.181767	-0.0854552	0.389728	-0.0598899	0.0578984	0.0690577	0.0142415	0.416866	0.302091	-0.0295159	-0.262448	0.374746	-0.0254491	0.0528339	0.0258855	-0.0603802	0.053955
TCGA-EJ-5516-01A	-0.255297	0.0428589	0.214727	0.224536	0.342339	0.262123	0.492836	0.256827	0.115713	0.154722	-0.0635518	0.165361	-0.0671409	0.349159	-0.00135486	0.0728536	0.184841	0.0603969	0.431786	0.344144	0.00272719	-0.161972	0.371745	0.0868996	0.136619	0.0769533	-0.07221	0.122713
TCGA-EJ-5517-01A	-0.141739	0.0635936	0.285754	0.180057	0.324283	0.24804	0.5062	0.266348	0.113558	0.0844131	-0.0177042	0.186844	0.0409599	0.32857	-0.0238894	0.0761419	0.187383	-0.00339986	0.3889	0.271368	0.0094559	-0.229238	0.364382	0.0138707	0.121531	0.0792114	-0.0817782	0.0272404
TCGA-EJ-5518-01A	-0.291774	-0.00441045	0.193034	0.135767	0.318192	0.269496	0.485789	0.253401	0.0798764	0.111908	-0.0855442	0.19998	-0.088621	0.302774	-0.027521	0.0714718	0.179599	-0.00453059	0.41317	0.324055	0.0236398	-0.232601	0.34522	0.0483338	0.141097	0.0708703	-0.081156	0.0288212
TCGA-EJ-5519-01A	-0.26904	-0.0473734	0.144272	0.147616	0.294977	0.308376	0.488416	0.193765	0.0637816	0.0679874	-0.13475	0.156751	-0.143535	0.299129	-0.0701864	-0.0768229	0.119824	0.0167921	0.441552	0.277105	-0.0318123	-0.207816	0.386603	0.0102239	0.0790571	0.0244021	-0.14743	-0.00153929
TCGA-EJ-5521-01A	-0.220736	-0.0774397	0.203747	0.204198	0.342865	0.271554	0.476834	0.235117	0.0630669	0.0810807	-0.160562	0.190593	-0.126685	0.338057	-0.0104344	0.0093504	0.159569	-0.00632228	0.439045	0.266165	-0.0134326	-0.206259	0.371685	0.0251529	0.109924	0.0425631	-0.0555535	0.0591821
TCGA-EJ-5522-01A	-0.189584	0.0252637	0.237917	0.191516	0.332821	0.251402	0.497108	0.233645	0.124728	0.0971005	-0.134105	0.171345	-0.0490961	0.357109	-0.0476926	0.0188897	0.140728	0.0466125	0.407105	0.295869	-0.0288077	-0.235534	0.350782	0.0400635	0.0897513	0.0506348	-0.0896194	0.0464727
TCGA-EJ-5524-01A	-0.228683	0.0198278	0.250522	0.196939	0.334077	0.233468	0.476998	0.23338	0.134413	0.156387	-0.0351743	0.150612	6.4234e-05	0.369565	-0.0181373	-0.00481561	0.206537	0.0582459	0.396469	0.303191	-0.00814574	-0.247303	0.376401	0.080013	0.108425	0.0746556	-0.112068	0.0661037
TCGA-EJ-5525-01A	-0.252237	0.0365667	0.140129	0.149842	0.283286	0.238273	0.474086	0.296308	0.107443	0.110219	-0.0260181	0.209993	-0.0409022	0.331804	-0.0271521	-0.0484816	0.13928	0.0844967	0.358439	0.242645	0.0496227	-0.220149	0.368171	0.0532073	0.106353	0.0705017	-0.120215	0.080311
TCGA-EJ-5526-01A	-0.2314	0.0143373	0.201495	0.202632	0.332284	0.242749	0.489362	0.244453	0.0999334	0.161493	-0.0853571	0.155817	0.000725157	0.37147	-0.0265085	0.0557409	0.184103	0.0605552	0.417045	0.324092	-1.84345e-06	-0.229802	0.381078	0.0498256	0.112615	0.0409709	-0.0998668	0.0540009
TCGA-EJ-5527-01A	-0.193741	0.0333827	0.219364	0.200018	0.342265	0.260659	0.49669	0.255406	0.129674	0.13621	-0.0412823	0.179889	-0.00653802	0.366928	-0.00814988	0.0488321	0.203864	0.0801289	0.401873	0.324931	-0.00116724	-0.24709	0.375981	0.0718261	0.111328	0.0681574	-0.0978032	0.117308
TCGA-EJ-5530-01A	-0.276528	-0.109069	0.172014	0.130323	0.31683	0.246779	0.455619	0.215967	0.0807544	0.0666456	-0.104587	0.143822	-0.136994	0.333763	-0.0688223	-0.00211808	0.0837889	0.0152008	0.416026	0.269794	-0.0412215	-0.259049	0.355098	-0.0143875	0.0907667	0.0338385	-0.118439	-0.0134084
TCGA-EJ-5531-01A	-0.140555	0.00803979	0.250297	0.226171	0.34884	0.278914	0.516946	0.285341	0.0832542	0.14525	-0.139925	0.226041	-0.0133335	0.350148	0.0194	0.079309	0.289762	0.061484	0.438039	0.323295	0.033604	-0.224731	0.379918	0.135371	0.126731	0.084872	-0.0847805	0.0914915
TCGA-EJ-5532-01A	-0.271026	-0.0478473	0.176759	0.154686	0.307399	0.249522	0.469315	0.231912	0.0937567	0.0588828	-0.108641	0.155323	-0.0912314	0.342631	-0.0663037	-0.0145203	0.106462	-0.0121523	0.399178	0.266151	-0.0286522	-0.26326	0.358704	-0.0219697	0.0871463	0.02948	-0.0976222	0.00338554
TCGA-EJ-5542-01A	-0.205486	-0.015294	0.185258	0.152974	0.328641	0.235356	0.478552	0.237913	0.135361	0.108826	-0.0795266	0.151714	-0.0459998	0.344688	-0.0375489	-0.0121326	0.102175	0.0707831	0.430805	0.291552	-0.0296246	-0.225312	0.362959	0.00628491	0.0900215	0.0510243	-0.111613	0.053674
TCGA-EJ-7115-01A	-0.284837	-0.0670862	0.185759	0.178713	0.323235	0.288787	0.48956	0.22048	0.0685032	0.0953658	-0.129148	0.146341	-0.0870378	0.30064	-0.0287692	0.0528673	0.11	0.0116878	0.419553	0.306209	-0.0212717	-0.240179	0.373144	0.0111818	0.0774852	0.0165038	-0.083431	0.0561778
TCGA-EJ-7123-01A	-0.250918	-0.0712395	0.167999	0.139602	0.306034	0.275567	0.448033	0.224329	0.0609269	0.0634363	-0.206485	0.201335	-0.1278	0.314627	-0.0488677	-0.051268	0.076747	-0.0168585	0.424356	0.241942	-0.0394006	-0.213929	0.352397	-0.0357581	0.0879924	0.0230229	-0.0817018	0.0359721
TCGA-EJ-7125-01A	-0.193769	0.0466775	0.212438	0.161222	0.294657	0.25386	0.480739	0.224161	0.0809524	0.0700969	-0.0380891	0.242311	-0.0389496	0.342402	-0.0565978	0.101943	0.148595	-0.0348654	0.397173	0.27949	-0.0100871	-0.278117	0.339881	0.00195282	0.142669	0.0699697	-0.117061	0.0745687
TCGA-EJ-7314-01A	-0.287211	-0.0507566	0.158119	0.155046	0.320522	0.27682	0.455264	0.22213	0.0936943	0.0979247	-0.0282365	0.177833	-0.181456	0.329729	-0.05699	0.0349962	0.0453784	0.0208212	0.425166	0.253343	-0.0142314	-0.217774	0.329425	-0.080829	0.0740751	0.0356181	-0.108386	0.036068
TCGA-EJ-7315-01A	-0.00961134	0.0556332	0.34639	0.202429	0.350975	0.267548	0.52687	0.231919	0.128404	0.15717	-0.127784	0.181718	0.0937127	0.308039	0.00645696	-0.0421815	0.286685	0.0653575	0.444239	0.297313	0.0159051	-0.186959	0.391997	0.0745018	0.164429	0.127457	-0.10701	0.0700759
TCGA-EJ-7317-01A	-0.27021	-0.109615	0.145569	0.116303	0.323512	0.276745	0.442507	0.199063	0.0497385	0.0460789	-0.164396	0.165789	-0.147223	0.312271	-0.0723765	-0.0465122	0.0484405	-0.0326001	0.430869	0.252612	-0.0531318	-0.259325	0.33447	-0.0625739	0.0836383	-0.00779826	-0.110695	0.023124
TCGA-EJ-7321-01A	-0.141978	0.0503038	0.274222	0.184153	0.331889	0.238218	0.464338	0.222018	0.0852149	0.121295	-0.028426	0.147574	-0.0267006	0.349626	-0.038259	-0.0316684	0.145377	0.0515486	0.43222	0.270677	-0.0541164	-0.249875	0.362528	-0.00205524	0.0854037	0.0525393	-0.107339	0.0410423
TCGA-EJ-7327-01A	-0.242544	-0.0384505	0.160633	0.140367	0.313792	0.245653	0.486488	0.251647	0.102716	0.118282	-0.105507	0.150592	-0.0409509	0.344731	-0.0371485	-0.0418787	0.164452	0.0662004	0.416811	0.309548	-0.0229828	-0.26362	0.383413	0.0328144	0.0908097	0.0385124	-0.119071	0.0318735
TCGA-EJ-7328-01A	-0.117955	0.0207876	0.323696	0.26703	0.358414	0.301841	0.539875	0.239643	0.0858219	0.191983	-0.154856	0.175239	-0.00669645	0.383155	0.0471775	0.0108632	0.32215	0.0250219	0.428355	0.333366	0.0436253	-0.200102	0.406296	0.0783562	0.137417	0.0965786	-0.0908045	0.0477901
TCGA-EJ-7330-01A	-0.260612	-0.0546386	0.177129	0.150838	0.337955	0.255509	0.488039	0.25466	0.0701873	0.0857352	-0.0646469	0.188444	-0.0672632	0.348583	-0.0504104	0.0965015	0.147387	0.000816493	0.410093	0.328345	-0.00523756	-0.198912	0.400936	0.00109912	0.109021	0.0562131	-0.0957471	0.070822
TCGA-EJ-7331-01A	-0.167966	0.00889461	0.18523	0.17339	0.327266	0.256345	0.500102	0.269182	0.103061	0.110127	-0.0753489	0.212613	0.00850919	0.352593	-0.0123227	0.0926355	0.211523	-0.00904086	0.422816	0.328924	0.00829342	-0.194614	0.403679	0.0722454	0.118776	0.0634286	-0.110983	0.0420238
TCGA-EJ-7781-01A	-0.174518	-0.00150936	0.193468	0.215149	0.304634	0.263346	0.486413	0.26215	0.0650118	0.0833696	-0.0724325	0.211648	-0.0425687	0.358499	-0.0362545	0.0364734	0.190841	0.0133212	0.41363	0.321386	-0.0201437	-0.214071	0.37813	0.0826029	0.0908229	0.0502518	-0.095742	-0.00461389
TCGA-EJ-7782-01A	-0.259644	-0.0133537	0.175463	0.170641	0.306466	0.294026	0.470493	0.209534	0.0771733	0.0708975	-0.123279	0.146191	-0.0550996	0.287228	-0.0607162	0.0116814	0.14342	-0.00262236	0.425397	0.311133	-0.0185054	-0.297222	0.36549	0.0353418	0.0793229	0.0114263	-0.115228	0.0518459
TCGA-EJ-7783-01A	-0.17924	-0.0177971	0.17881	0.174209	0.33654	0.288185	0.485793	0.238636	0.0811213	0.123988	-0.0734092	0.15187	-0.0646268	0.349621	-0.0163597	0.0494255	0.164933	0.0210617	0.375866	0.332709	-0.0215335	-0.166889	0.416968	0.00620651	0.0860461	0.0308693	-0.111167	0.0691076
TCGA-EJ-7784-01A	-0.277679	-0.0127787	0.182927	0.121601	0.298466	0.204886	0.447466	0.202729	0.0865296	0.0821413	-0.114648	0.165965	-0.114834	0.307149	-0.0934392	-0.0943328	0.0586162	0.0418734	0.399159	0.251829	-0.0602762	-0.232105	0.353467	-0.055908	0.0379808	0.0200799	-0.107608	0.0106783
TCGA-EJ-7785-01A	-0.152067	0.008201	0.189642	0.223901	0.319086	0.268438	0.490685	0.255109	0.0976329	0.15165	-0.117051	0.174545	-0.0117752	0.35426	0.00515464	0.0574512	0.2215	0.0417239	0.419602	0.333155	0.0129962	-0.171553	0.417529	0.0713209	0.127144	0.070779	-0.0894063	0.0641998
TCGA-EJ-7786-01A	-0.233488	-0.0790883	0.176528	0.14933	0.321453	0.272397	0.47826	0.23676	0.0633595	0.0398247	-0.104707	0.172399	-0.114823	0.315365	-0.0543038	-0.00542253	0.131988	-0.0267393	0.413884	0.270385	-0.0406918	-0.20728	0.36113	-0.0138037	0.0804123	0.0446621	-0.077012	0.0168523
TCGA-EJ-7788-01A	-0.255325	-0.00207627	0.201962	0.174535	0.299483	0.251226	0.485732	0.254467	0.103768	0.106404	-0.0929704	0.153566	-0.0520939	0.333973	-0.0522429	0.0113269	0.146882	0.0621733	0.398581	0.289165	-0.0147574	-0.285477	0.367665	0.0326423	0.0985807	0.0555696	-0.157981	0.0148206
TCGA-EJ-7789-01A	-0.291695	-0.0477624	0.142831	0.138545	0.258685	0.230242	0.441269	0.213156	0.101763	0.0311002	-0.141943	0.205093	-0.12032	0.329785	-0.0669929	-0.0513779	0.0881511	0.00702624	0.424625	0.213711	-0.0366382	-0.345508	0.372515	-0.037805	0.0533724	-0.0120797	-0.156595	0.0596459
TCGA-EJ-7791-01A	-0.185796	-0.0108443	0.189026	0.189066	0.331266	0.287698	0.499295	0.256273	0.0642864	0.119382	-0.0712515	0.198041	-0.0908696	0.35561	-0.029985	0.0825479	0.20832	0.0298929	0.400383	0.334332	0.00677407	-0.255859	0.387717	0.0247036	0.122871	0.0750759	-0.0946581	0.0627573
TCGA-EJ-7792-01A	-0.110587	0.0234285	0.254619	0.198956	0.364177	0.277378	0.522928	0.273002	0.152877	0.16727	-0.092683	0.186347	0.0422535	0.341175	0.0241072	0.0704114	0.288705	0.00469269	0.384281	0.340959	0.0256799	-0.21105	0.393784	0.0772962	0.149486	0.137861	-0.077346	0.0586392
TCGA-EJ-7793-01A	-0.263874	-0.128656	0.16255	0.124386	0.342357	0.258839	0.469316	0.193004	0.0640557	0.0746299	-0.183021	0.167901	-0.140122	0.366345	-0.0629884	-0.0638591	0.0152964	0.00605824	0.418266	0.283493	-0.030049	-0.215049	0.349492	-0.0610761	0.0564586	0.0125852	-0.0788937	0.0202881
TCGA-EJ-7794-01A	-0.171061	-0.00285762	0.177016	0.196469	0.321576	0.27136	0.489099	0.279796	0.0753251	0.116944	-0.0897307	0.194102	-0.0280379	0.33743	0.00164669	0.120114	0.245663	0.0491594	0.436666	0.330203	0.00765051	-0.158674	0.393391	0.0735029	0.124566	0.0765468	-0.0550065	0.0455326
TCGA-EJ-7797-01A	-0.213973	-0.0370544	0.217446	0.187139	0.337503	0.276039	0.491742	0.2141	0.0902638	0.0958054	-0.0397616	0.140899	-0.133189	0.322239	-0.0313287	0.0277711	0.151701	0.0060576	0.439357	0.286695	-0.0306929	-0.237344	0.397124	-0.0244149	0.0908791	0.0409225	-0.120199	0.012406
TCGA-EJ-8468-01A	-0.257937	0.0385371	0.247223	0.225631	0.307852	0.224174	0.510243	0.259913	0.110024	0.157174	-0.00992757	0.227455	-0.00239889	0.322162	0.00334851	0.149667	0.245229	-0.0033347	0.416967	0.307686	0.0221124	-0.18572	0.370314	0.0688927	0.138215	0.069272	-0.0663338	0.0738045
TCGA-EJ-8469-01A	-0.276203	-0.00259883	0.189985	0.161574	0.295582	0.219628	0.440636	0.201605	0.162847	0.110429	-0.170728	0.20069	-0.12945	0.330782	-0.083285	-0.0934501	0.0760754	0.0398583	0.369109	0.216383	-0.0292206	-0.235768	0.360524	-0.0102191	0.0377313	0.00189481	-0.162062	0.05828
TCGA-EJ-8470-01A	-0.0586952	0.199494	0.402137	0.307627	0.352362	0.276159	0.530522	0.249126	0.134823	0.239715	-0.0617732	0.25615	0.0727053	0.31756	0.0391722	0.0144011	0.329215	-0.0133525	0.401567	0.323333	0.0238791	-0.240787	0.374721	0.0812494	0.139234	0.0974034	-0.0779391	0.0654654
TCGA-EJ-8472-01A	-0.354931	-0.040047	0.131367	0.158425	0.302804	0.222895	0.451039	0.185127	0.0966896	0.0717195	-0.0731945	0.17833	-0.126843	0.316406	-0.0475352	0.0144294	0.0688561	0.0051503	0.400778	0.2712	-0.0357819	-0.285413	0.390343	-0.0486658	0.0699987	-0.0135024	-0.0923363	-0.00164101
TCGA-EJ-8474-01A	-0.267396	-0.0389509	0.186405	0.162093	0.336067	0.257368	0.492769	0.202245	0.0930188	0.0720758	-0.110661	0.202571	-0.11546	0.318631	-0.0304204	-0.0116072	0.0850608	0.000425446	0.412938	0.283162	-0.00889422	-0.275443	0.391189	-0.0225677	0.0929378	0.0350912	-0.0917921	0.0305053
TCGA-EJ-A46B-01A	-0.254322	-0.154502	0.133338	0.145177	0.325818	0.282169	0.472212	0.180234	0.0495716	0.0459793	-0.176182	0.166484	-0.131838	0.371101	-0.0659597	-0.011653	0.0211246	-0.0383843	0.4191	0.260305	-0.037965	-0.273591	0.354257	-0.0780723	0.0603348	0.0050582	-0.0983569	-0.0202806
TCGA-EJ-A46D-01A	-0.266418	-0.108353	0.1971	0.162844	0.335598	0.30492	0.478938	0.179883	0.0887013	0.110886	-0.147422	0.160101	-0.121817	0.340876	-0.0469327	-0.0146872	0.0720448	0.00947417	0.406559	0.293742	-0.052257	-0.249072	0.385754	-0.0640844	0.0849014	0.0269177	-0.100364	-0.0205183
TCGA-EJ-A46E-01A	-0.260654	-0.0581318	0.175802	0.192095	0.33911	0.316097	0.491203	0.228274	0.055897	0.129162	0.0442969	0.117968	-0.124867	0.361464	-0.00847389	0.0681167	0.119054	0.0656957	0.395291	0.327968	-0.00432831	-0.255321	0.40184	-0.033616	0.102604	0.0692196	-0.0498665	0.0796395
TCGA-EJ-A46F-01A	-0.303996	-0.109308	0.187944	0.139465	0.30777	0.259302	0.384832	0.166101	0.10723	0.0366182	-0.20832	0.139699	-0.209344	0.281397	-0.03112	-0.113266	0.0378253	-0.0383342	0.443568	0.175189	-0.0515784	-0.213474	0.352268	-0.0578061	0.0190758	-0.0297443	-0.162475	-0.0384294
TCGA-EJ-A46G-01A	-0.265592	-0.0165603	0.179549	0.161061	0.287299	0.330338	0.469743	0.222296	0.0274835	0.0818294	-0.113496	0.191282	-0.125642	0.263052	-0.0409965	-0.0337218	0.138703	-0.00953116	0.426159	0.258564	-0.0250842	-0.264207	0.350208	0.0123259	0.0714105	0.0519825	-0.0359714	0.0320821
TCGA-EJ-A46H-01A	-0.151686	0.0416914	0.220371	0.178359	0.335973	0.328379	0.522946	0.29272	0.0927398	0.200241	0.0425381	0.153204	-0.0875237	0.367211	0.0210666	0.118941	0.259279	0.0764032	0.403838	0.398667	0.0387775	-0.251933	0.424575	0.0427396	0.146199	0.125465	-0.0710171	0.084441
TCGA-EJ-A46I-01A	-0.221633	-0.116544	0.168504	0.178247	0.32091	0.298986	0.488152	0.205137	0.0452609	0.0636865	-0.133888	0.164785	-0.15355	0.357308	-0.0703066	-0.0569289	0.0786728	0.00671039	0.415467	0.317702	-0.0443954	-0.270722	0.393122	-0.0591751	0.0674688	0.0399669	-0.0785261	0.00517315
TCGA-EJ-A65B-01A	-0.24993	-0.0813237	0.190778	0.142592	0.33394	0.320765	0.480779	0.208933	0.0768455	0.100448	-0.128346	0.194026	-0.148403	0.333802	0.0220715	0.0233829	0.156064	-0.0258603	0.413119	0.26793	0.00586554	-0.247112	0.384757	0.0358864	0.120351	0.0243738	-0.0318785	0.0192797
TCGA-EJ-A65D-01A	-0.346348	-0.0920035	0.145966	0.0688576	0.293997	0.284048	0.391697	0.13977	0.0443379	-0.00792494	-0.196781	0.174645	-0.244165	0.300501	-0.0781138	-0.156225	-0.0200972	0.0133062	0.387534	0.157236	-0.0851518	-0.230332	0.336428	-0.086649	-0.00558129	-0.0510271	-0.114895	-0.0559728
TCGA-EJ-A65E-01A	-0.30773	-0.0261506	0.213323	0.162726	0.308491	0.272106	0.457748	0.18172	0.0625869	0.0412071	-0.131203	0.144713	-0.159472	0.298209	-0.0549159	-0.00274089	0.0906735	-0.062747	0.405548	0.234404	-0.0605862	-0.263766	0.340299	-0.0732989	0.0358149	-0.027777	-0.104464	0.0590534
TCGA-EJ-A65F-01A	-0.283433	0.0054733	0.23544	0.144878	0.310416	0.299334	0.465232	0.211676	0.12782	0.125967	0.0394441	0.137807	-0.0999786	0.351991	-0.00888572	0.0778847	0.159132	0.00338708	0.395811	0.272292	-0.0210672	-0.227199	0.376125	0.0316937	0.0899546	0.049832	-0.114683	0.0545439
TCGA-EJ-A65G-01A	-0.287681	-0.101928	0.164869	0.126427	0.307585	0.284765	0.445018	0.186804	0.0637642	0.0243498	-0.117083	0.184373	-0.16646	0.332244	-0.0588575	-0.0403758	0.0381697	-0.0783415	0.404726	0.219955	-0.0674426	-0.237526	0.349177	-0.0844992	0.0565313	-0.010148	-0.101009	-0.0205097
TCGA-EJ-A65J-01A	-0.29927	-0.0762067	0.182497	0.167748	0.315947	0.286797	0.465186	0.215433	0.0734545	0.0696004	-0.107218	0.223709	-0.0529904	0.304226	-0.0213949	-0.0608073	0.119099	-0.0875301	0.450925	0.256535	-0.0337567	-0.268406	0.351058	0.0228412	0.0878825	0.0189024	-0.103587	0.0140084
TCGA-EJ-A65M-01A	-0.263631	-0.0100767	0.279198	0.194623	0.345643	0.270661	0.471453	0.224743	0.064354	0.0997665	-0.136642	0.230976	-0.0705547	0.314663	-0.0064131	0.0143849	0.191478	0.0108164	0.414944	0.290726	-0.0137482	-0.216701	0.380647	-0.0158643	0.0826679	0.0336842	-0.093073	0.0304142
TCGA-EJ-A6RA-01A	-0.226822	-0.0915923	0.250242	0.155317	0.339411	0.312143	0.477424	0.212338	0.061752	0.0820406	-0.192287	0.159435	-0.139869	0.332403	-0.0134298	-0.0142209	0.147509	-0.0285192	0.410224	0.266649	-0.0310161	-0.242947	0.383427	-0.0356799	0.0835866	0.03025	-0.0883304	2.831e-06
TCGA-EJ-A6RC-01A	-0.00209624	0.0491438	0.318222	0.177022	0.349781	0.29492	0.525159	0.252399	0.100616	0.146437	-0.0978016	0.201996	0.0573903	0.321796	0.00176945	0.0977747	0.288627	-0.00360314	0.387581	0.330059	0.00185952	-0.258982	0.403271	0.0376569	0.138072	0.108503	-0.0865175	0.0246919
TCGA-EJ-A7NF-01A	-0.270868	-0.096886	0.204323	0.144822	0.330432	0.274597	0.423401	0.185078	0.0625532	0.0560123	-0.159581	0.170491	-0.19808	0.335559	-0.059714	-0.155903	0.0411327	-0.0385347	0.41308	0.215122	-0.0507371	-0.260058	0.356805	-0.0524746	0.0457781	-0.0162441	-0.102395	-0.0311286
TCGA-EJ-A7NG-01A	-0.199851	-0.0785636	0.169763	0.18526	0.349912	0.279737	0.495732	0.218306	0.0774578	0.102629	-0.110454	0.150168	-0.124309	0.365424	-0.0241352	0.0391219	0.172447	-0.0171442	0.397225	0.327253	-0.0196388	-0.239205	0.394674	-0.0312254	0.0865947	0.0383663	-0.0793362	0.0261367
TCGA-EJ-A7NH-01A	-0.272545	-0.120938	0.187119	0.158067	0.319524	0.324267	0.469631	0.186915	0.0518113	0.0685291	-0.173434	0.156742	-0.159026	0.334391	-0.0510278	-0.0359721	0.0850011	-0.00755177	0.389015	0.278053	-0.0416716	-0.245072	0.374137	-0.0508428	0.0680665	0.0131755	-0.0982449	-0.0386796
TCGA-EJ-A7NJ-01A	-0.165171	-0.0230609	0.251899	0.191574	0.312157	0.284815	0.497331	0.191988	0.0696856	0.0959234	-0.125826	0.163063	-0.066022	0.372714	-0.0507148	-0.0564683	0.129813	-0.0523396	0.418551	0.284817	-0.0562425	-0.316737	0.379499	-0.044137	0.0782677	0.0111529	-0.066648	0.02166
TCGA-EJ-A7NK-01A	-0.244287	-0.115258	0.161398	0.162863	0.323117	0.313035	0.491452	0.197132	0.0588965	0.0872387	-0.120106	0.137737	-0.159521	0.368395	-0.055059	-0.00384635	0.0728261	0.00389214	0.413005	0.310236	-0.0449946	-0.296565	0.398361	-0.0761877	0.061058	0.00784266	-0.0731284	0.0220164
TCGA-EJ-A7NM-01A	-0.0552945	0.0583862	0.33111	0.177657	0.333472	0.25681	0.492103	0.281121	0.107576	0.129902	-0.17134	0.18912	0.0224574	0.283662	-0.00299381	-0.0364171	0.259886	0.0456903	0.431063	0.301713	-0.0010716	-0.263162	0.36594	0.0146461	0.0942416	0.0786439	-0.0849792	0.0800453
TCGA-EJ-A7NN-01A	-0.114575	0.0298817	0.216599	0.227996	0.347561	0.310176	0.481996	0.227916	0.0965942	0.113665	-0.0274801	0.170927	-9.16887e-05	0.282636	-0.0294006	0.0830218	0.20455	-0.0419776	0.427714	0.314026	-0.0149803	-0.197967	0.397151	0.0241365	0.088148	0.0304489	-0.116276	0.0333526
TCGA-EJ-A8FN-01A	-0.169322	-0.0243799	0.255343	0.160308	0.341535	0.267352	0.509452	0.237519	0.121353	0.102259	-0.11802	0.200974	-0.0711111	0.315126	-0.0196023	-0.0107666	0.193291	-0.0737813	0.411039	0.28644	-0.000710899	-0.267113	0.358943	-0.00684464	0.109591	0.0795192	-0.0737062	-0.0155953
TCGA-EJ-A8FO-01A	-0.241828	-0.103364	0.150988	0.150297	0.313948	0.290538	0.474033	0.197379	0.0687634	0.0626585	-0.150001	0.163	-0.151673	0.372188	-0.0551639	-0.028474	0.0736192	-0.0196694	0.411392	0.271406	-0.029366	-0.255951	0.369366	-0.043743	0.0651468	0.018085	-0.0745388	0.04244
TCGA-EJ-A8FP-01A	-0.207782	-0.0581882	0.205157	0.21196	0.337735	0.316547	0.511231	0.208912	0.0708862	0.118966	-0.129813	0.157347	-0.114001	0.373655	-0.0118599	0.0291411	0.189141	0.00682956	0.405817	0.353425	-0.0123944	-0.250962	0.415201	0.00931826	0.122993	0.054086	-0.0783774	0.0509967
TCGA-EJ-A8FS-01A	-0.309843	-0.0663428	0.192912	0.150928	0.311141	0.29318	0.437733	0.192216	0.0664144	0.0304054	-0.172294	0.200506	-0.0659615	0.280696	-0.0713635	-0.107416	0.0517172	0.00891207	0.414708	0.198408	-0.0455843	-0.268795	0.351801	-0.0668312	0.0251865	-0.0330278	-0.0841708	-0.0126876
TCGA-EJ-A8FU-01A	-0.204864	-0.0385669	0.214134	0.17387	0.333961	0.306695	0.495338	0.225524	0.0872898	0.12684	-0.0473319	0.172267	-0.0893863	0.37203	-0.0114	0.0959458	0.228687	-0.00650684	0.390573	0.34147	-0.00442541	-0.20289	0.392165	-0.0213302	0.11518	0.0639465	-0.0524009	0.0331972
TCGA-EJ-AB20-01A	-0.16337	-0.0118511	0.339897	0.136209	0.352668	0.306131	0.50419	0.263468	0.0975382	0.163665	-0.0544007	0.156789	-0.0682492	0.355988	0.0194848	0.0760727	0.252238	-0.00827328	0.384841	0.340665	0.0523787	-0.329423	0.446511	0.0312381	0.164911	0.127922	-0.073949	0.0714616
TCGA-EJ-AB27-01A	-0.0428946	0.0522389	0.300401	0.183375	0.344666	0.286853	0.505326	0.202604	0.0712831	0.0975099	-0.0500565	0.195651	0.00433966	0.352225	-0.0474384	0.0800558	0.190604	-0.0390437	0.419217	0.29284	-0.0326261	-0.283906	0.382499	-0.0309077	0.0914036	0.0634958	-0.0770352	0.0469022
TCGA-FC-7708-01A	-0.211788	-0.00909242	0.226816	0.196211	0.346437	0.2929	0.50725	0.24062	0.0802568	0.147747	-2.49689e-06	0.166198	-0.0731196	0.366163	-0.0344357	0.072485	0.17444	0.0344476	0.410979	0.336241	0.0168511	-0.26695	0.393941	0.0260983	0.133273	0.0773244	-0.0951811	0.0487882
TCGA-FC-7961-01A	-0.30078	0.00689046	0.1752	0.206359	0.350408	0.249816	0.4735	0.278721	0.104717	0.110781	-0.176674	0.190669	-0.079369	0.330181	-0.0234323	-0.0198988	0.148054	0.016696	0.368223	0.340067	0.00981201	-0.247057	0.346039	0.012144	0.0723866	0.0445452	-0.103795	0.0431129
TCGA-FC-A4JI-01A	-0.293497	0.150309	0.266778	0.161922	0.302792	0.271203	0.447034	0.221763	0.0732633	0.0441003	-0.213905	0.284547	-0.121156	0.351115	-0.0504095	-0.11904	0.128852	0.0557741	0.392867	0.212736	-0.0217755	-0.24729	0.271133	-0.0368405	0.0116206	0.0185202	-0.080736	0.0474421
TCGA-FC-A5OB-01A	-0.349336	-0.0667517	0.139428	0.120652	0.328874	0.224261	0.385772	0.193464	0.121565	-0.0115944	-0.120927	0.166774	-0.154556	0.326593	-0.0562217	-0.140184	0.0508283	-0.0183259	0.430388	0.200232	-0.0776333	-0.231997	0.357564	-0.115473	0.0331995	-0.0089551	-0.11094	0.0125868
TCGA-FC-A66V-01A	-0.223174	-0.114418	0.219864	0.161293	0.332482	0.317646	0.483559	0.219897	0.0758511	0.112954	-0.111792	0.178446	-0.141442	0.339294	-0.00211375	-0.0314599	0.174606	-0.0695101	0.407822	0.278509	-0.0140932	-0.302708	0.346315	-0.0462314	0.101963	0.00416092	-0.0597204	-0.044291
TCGA-FC-A6HD-01A	-0.203007	-0.00498013	0.237314	0.144249	0.356	0.308623	0.407869	0.174483	0.0720258	0.0314031	-0.137725	0.175921	-0.16358	0.293585	-0.0169871	0.01941	0.10531	0.0162016	0.429971	0.172499	-0.0741903	-0.279346	0.346409	-0.0794024	0.0378786	-0.0213142	-0.118781	-0.00240324
TCGA-FC-A8O0-01A	-0.260727	-0.212716	0.107471	0.112641	0.35526	0.30688	0.458228	0.201613	0.092904	0.0299782	-0.164157	0.133276	-0.175992	0.331633	-0.0627598	-0.0617914	0.0198002	-0.0733266	0.402555	0.287505	-0.0331645	-0.372624	0.421797	-0.128945	0.0758035	0.000812527	-0.125796	-0.000559359
TCGA-G9-6329-01A	-0.189442	-0.00686597	0.269054	0.208232	0.34437	0.292002	0.502834	0.231257	0.101076	0.12688	-0.131539	0.158576	-0.103429	0.322069	0.0024141	-0.0146335	0.164396	0.000500504	0.41446	0.323368	0.000108256	-0.211235	0.38855	-0.0399876	0.113764	0.0702913	-0.073202	0.0409313
TCGA-G9-6332-01A	-0.313571	-0.119217	0.203323	0.115817	0.33418	0.254978	0.430318	0.205574	0.0767932	0.0404191	-0.109768	0.14625	-0.168869	0.313545	-0.0723475	-0.0973747	0.0238779	-0.0391905	0.414831	0.20473	-0.0488237	-0.253363	0.373689	-0.0503932	0.0527446	0.00335599	-0.146746	-0.048466
TCGA-G9-6333-01A	-0.247861	-0.00380305	0.217084	0.195647	0.354707	0.288226	0.469545	0.216187	0.0529098	0.105734	-0.0253019	0.183895	-0.0660027	0.320399	-0.0288438	0.0515394	0.135376	-0.0280769	0.4189	0.288018	0.00579321	-0.269911	0.36659	-0.0198196	0.130403	0.063611	-0.0447844	0.0688401
TCGA-G9-6336-01A	-0.23567	-0.0811346	0.180823	0.194084	0.340456	0.290488	0.49375	0.218847	0.0788463	0.102584	-0.0592297	0.169401	-0.152324	0.373041	-0.0296181	-0.0121425	0.11377	-0.00736256	0.424576	0.2802	-0.0111842	-0.249501	0.365449	-0.0619491	0.0792414	0.0405435	-0.0762897	0.0370771
TCGA-G9-6338-01A	-0.317458	-0.151006	0.15975	0.134219	0.329117	0.319418	0.479961	0.212853	0.101377	0.103502	-0.110513	0.215435	-0.182852	0.304251	-0.0357506	-0.0135865	0.0926122	-0.094096	0.398036	0.293412	0.0228491	-0.229266	0.370813	-0.104073	0.0828087	0.0599036	-0.0339864	0.0119964
TCGA-G9-6339-01A	-0.26218	-0.0551081	0.243865	0.17941	0.354986	0.30211	0.477737	0.216562	0.0748322	0.065279	-0.0697853	0.145182	-0.129024	0.337133	-0.0323636	-0.0363509	0.119967	-0.0764942	0.415237	0.256876	-0.00880353	-0.245845	0.356478	-0.115032	0.0884509	0.0348766	-0.0752608	-0.0039827
TCGA-G9-6342-01A	-0.241935	-0.0548607	0.174797	0.175545	0.342546	0.290501	0.462854	0.192682	0.0774163	0.057568	-0.0919784	0.16951	-0.172468	0.339861	-0.0607269	-0.0890967	0.101942	-0.0212774	0.410969	0.279164	-0.0172414	-0.214271	0.39725	-0.0466806	0.075104	0.0271617	-0.111446	0.0376148
TCGA-G9-6343-01A	-0.245701	-0.103668	0.18855	0.123029	0.333644	0.320101	0.441996	0.213852	0.0594199	0.0394884	-0.176566	0.219134	-0.142592	0.290014	-0.0376675	-0.0122715	0.0741303	-0.0724041	0.39976	0.245731	-0.0039197	-0.252251	0.355716	-0.0757274	0.101597	0.0224866	-0.0652672	-0.0204962
TCGA-G9-6347-01A	-0.0063985	-0.0667057	0.368748	0.149968	0.31898	0.309089	0.485043	0.246173	0.12387	0.200634	-0.134632	0.236136	-0.0262625	0.318921	0.0389086	0.0639459	0.312704	-0.060424	0.429594	0.317773	0.0560284	-0.222653	0.379328	0.0430955	0.149556	0.121822	-0.0507224	-0.0159071
TCGA-G9-6348-01A	-0.240246	-0.0270954	0.257623	0.209197	0.360829	0.304506	0.499166	0.229116	0.10975	0.140863	0.0353079	0.211596	-0.0871257	0.350665	0.0141932	0.0578573	0.183714	0.0225322	0.42462	0.293547	0.0452587	-0.234712	0.392425	-0.0235414	0.125793	0.0885106	-0.079293	0.0450424
TCGA-G9-6351-01A	-0.24692	-0.125635	0.17885	0.13988	0.330642	0.29374	0.459519	0.182712	0.0727068	0.0848913	-0.0998747	0.163035	-0.17396	0.324476	-0.0597435	-0.0162787	-0.00270424	-0.0254694	0.42371	0.269142	-0.0327561	-0.226958	0.35717	-0.096015	0.0662212	0.0322535	-0.0967171	0.0278398
TCGA-G9-6353-01A	-0.235399	-0.150766	0.147424	0.137283	0.32277	0.292769	0.468681	0.184621	0.0499733	0.0511294	-0.14502	0.153158	-0.172042	0.357183	-0.0616654	-0.0178297	0.0523119	-0.0273394	0.423288	0.285767	-0.0313479	-0.25926	0.382353	-0.106711	0.085899	0.035181	-0.0803204	0.00543185
TCGA-G9-6354-01A	-0.297812	-0.108933	0.215786	0.149782	0.331043	0.267497	0.440378	0.185624	0.0910118	0.0529256	-0.0603635	0.170037	-0.173911	0.33601	-0.0582577	-0.0486449	0.0667391	-0.0886071	0.412872	0.221089	-0.028502	-0.238468	0.365163	-0.0470792	0.0635911	0.0140924	-0.0846434	-0.0198081
TCGA-G9-6356-01A	-0.232617	-0.033614	0.277473	0.234995	0.364652	0.296939	0.517412	0.249071	0.115722	0.143404	-0.0748854	0.181887	-0.0835594	0.373176	0.00318673	0.0252064	0.251506	0.0360142	0.428516	0.325767	0.0184848	-0.224862	0.407867	0.0168422	0.114236	0.0684262	-0.0714373	0.0479434
TCGA-G9-6361-01A	-0.32802	-0.127756	0.177762	0.116239	0.327933	0.235073	0.472202	0.204315	0.0723045	0.0819971	-0.155757	0.1802	-0.138324	0.321413	-0.0485662	-0.109604	0.0197233	-0.0013834	0.382132	0.284883	-0.0080047	-0.25659	0.391425	-0.0748147	0.0592554	0.0464513	-0.0828372	0.0173552
TCGA-G9-6362-01A	-0.296408	-0.0478204	0.201633	0.168364	0.330528	0.264648	0.455426	0.184095	0.0534544	0.0885832	-0.161815	0.159021	-0.146678	0.295096	-0.0350483	-0.0360462	0.0922077	-0.0923428	0.394523	0.262706	-0.013014	-0.185753	0.353096	-0.0599378	0.0771181	0.0294687	-0.119831	0.00392433
TCGA-G9-6363-01A	-0.215744	0.0428901	0.248214	0.172583	0.359496	0.251412	0.474965	0.2253	0.0883638	0.0796549	-0.158057	0.168027	-0.0979383	0.354097	-0.0456486	0.0335093	0.129723	-0.0104683	0.409423	0.270312	-0.00149078	-0.248052	0.337657	-0.0456268	0.0668728	0.0715015	-0.129569	0.0425112
TCGA-G9-6364-01A	-0.239522	-0.124279	0.177243	0.150207	0.343204	0.253035	0.462741	0.235321	0.0868261	0.052456	-0.0691398	0.198125	-0.158263	0.360478	-0.0452743	0.015062	0.080072	-0.0172303	0.394214	0.301121	0.0111683	-0.213474	0.384459	0.0162089	0.0914636	0.0539544	-0.0790738	0.0252504
TCGA-G9-6365-01A	-0.273046	-0.0370896	0.226169	0.160017	0.350857	0.248854	0.49891	0.242103	0.0812314	0.115175	-0.134097	0.174348	-0.131753	0.364836	-0.0315616	-0.0264843	0.159868	-0.00437381	0.398135	0.315018	0.0102432	-0.252541	0.401763	-0.0551863	0.110429	0.0952751	-0.0888055	0.0739654
TCGA-G9-6366-01A	-0.301278	-0.100397	0.226125	0.123643	0.336945	0.297872	0.45389	0.18949	0.0524522	0.0109491	-0.0765395	0.166767	-0.183641	0.281228	-0.0746409	-0.0634208	0.0309242	-0.0572074	0.413678	0.212893	-0.0801012	-0.221685	0.330788	-0.077846	0.0610318	0.0171252	-0.0583777	0.0386835
TCGA-G9-6367-01A	-0.208462	-0.0906858	0.193817	0.169764	0.348023	0.284116	0.490493	0.216451	0.0645219	0.0759313	-0.128856	0.176133	-0.101439	0.365671	-0.0661625	0.101598	0.0908784	-0.0251761	0.422458	0.317078	-0.0127536	-0.252375	0.382321	-0.0552852	0.0821187	0.0325571	-0.0467115	0.0367427
TCGA-G9-6369-01A	-0.309535	-0.0667728	0.204535	0.0874281	0.298964	0.254161	0.444801	0.200681	0.0561976	0.00795237	-0.145571	0.212376	-0.182971	0.239811	-0.0787391	-0.0628979	0.00562939	-0.0768849	0.412078	0.227593	-0.0344062	-0.249306	0.332449	-0.0895927	0.0760703	0.0148009	-0.0654777	0.0175676
TCGA-G9-6370-01A	-0.167939	-0.0130628	0.18963	0.19194	0.348779	0.286442	0.506775	0.243898	0.11656	0.149114	-0.0242976	0.17609	-0.0866018	0.378608	-0.014169	0.0872516	0.159264	0.0287534	0.411125	0.351341	0.0122171	-0.255151	0.373277	-0.0134357	0.130728	0.0585832	-0.0754719	0.069614
TCGA-G9-6371-01A	-0.267172	-0.0756041	0.211366	0.124458	0.31878	0.243897	0.456307	0.205488	0.0564394	0.0332607	-0.070695	0.187401	-0.126957	0.303669	-0.054569	-0.0348822	0.0436702	-0.0185413	0.426314	0.246093	-0.0219533	-0.25754	0.341488	-0.0488149	0.0675397	0.016184	-0.101263	0.00483655
TCGA-G9-6373-01A	-0.202274	-0.0194228	0.240056	0.202343	0.360401	0.282332	0.486965	0.209342	0.0867427	0.0924651	-0.0885029	0.16212	-0.106693	0.298848	0.0114677	-0.0459453	0.201454	-0.0119894	0.422155	0.289111	0.0172343	-0.208902	0.372266	-0.0370446	0.0924014	0.0540956	-0.0762663	0.0133012
TCGA-G9-6377-01A	-0.20722	-0.0112684	0.257746	0.2025	0.341308	0.279168	0.484995	0.220813	0.069016	0.111609	-0.0156622	0.178444	-0.0778261	0.336035	-0.0297312	0.015079	0.152029	-0.0408283	0.410142	0.261062	0.00348406	-0.245553	0.372886	-0.0312583	0.109831	0.0701904	-0.0634705	0.00864733
TCGA-G9-6378-01A	-0.252604	-0.0688872	0.199029	0.135533	0.370698	0.254395	0.485499	0.262381	0.0808291	0.0504987	-0.109756	0.191704	-0.0467448	0.334202	-0.0522794	0.00539289	0.111494	-0.0649301	0.388665	0.310832	-0.0109837	-0.276028	0.366789	-0.0465891	0.0793314	0.05201	-0.0741308	-0.00570542
TCGA-G9-6379-01A	-0.0618549	-0.0414729	0.384787	0.195454	0.342197	0.360834	0.490864	0.233785	0.0772285	0.209622	-0.093339	0.193686	-0.054814	0.310436	0.0716997	0.035424	0.357534	0.00534586	0.449705	0.294664	0.0278159	-0.202243	0.389914	0.0533512	0.149184	0.0898935	-0.0194595	-0.0027555
TCGA-G9-6384-01A	-0.156499	-0.00959482	0.195542	0.191225	0.33639	0.306297	0.492731	0.21506	0.0951547	0.113826	-0.00594954	0.161209	-0.0887784	0.353396	-0.0711499	0.114428	0.12572	0.0149053	0.417857	0.304238	0.00751863	-0.209427	0.36211	0.0217499	0.119443	0.088712	-0.0754755	0.052375
TCGA-G9-6385-01A	-0.229581	-0.111879	0.165315	0.162384	0.366604	0.283829	0.484744	0.230291	0.0666055	0.0657146	-0.0993336	0.173602	-0.131272	0.33644	-0.033311	0.00388081	0.139247	-0.039484	0.424994	0.299305	-0.0230569	-0.276549	0.372356	-0.0504914	0.0728156	0.031526	-0.0728445	0.020157
TCGA-G9-6494-01A	-0.270048	-0.0856861	0.172341	0.150481	0.310824	0.258432	0.458945	0.211031	0.0750754	0.0602901	-0.0760164	0.184069	-0.101874	0.315122	-0.058197	-0.0165927	0.0540338	-0.0463377	0.429713	0.283777	-0.0277725	-0.294582	0.358072	-0.0576171	0.0771421	0.0133924	-0.0889747	0.00391474
TCGA-G9-6496-01A	-0.238781	-0.0335839	0.206387	0.176542	0.339439	0.290268	0.461851	0.193879	0.0809098	0.0641092	-0.12738	0.179596	-0.178751	0.270253	-0.0484377	-0.0346416	0.0764466	-0.0256946	0.422107	0.253183	-0.00641672	-0.203218	0.370871	-0.0747586	0.0801776	0.00087664	-0.0908562	0.0170654
TCGA-G9-6498-01A	-0.0347206	0.142376	0.376428	0.21229	0.345283	0.318146	0.53025	0.24991	0.0731558	0.166109	0.0238551	0.198297	-0.0792705	0.317845	0.0571156	0.107928	0.269375	-0.0406313	0.43099	0.32135	0.068499	-0.22141	0.359463	-0.0418654	0.130843	0.130089	-0.056193	0.0513015
TCGA-G9-6499-01A	-0.220661	-0.0384607	0.2241	0.184284	0.329109	0.282898	0.463519	0.212305	0.0593918	0.0823969	-0.0677876	0.201432	-0.133654	0.307067	-0.0145	0.0334123	0.154948	-0.0179554	0.43413	0.263608	0.0108971	-0.208344	0.340442	-0.0734818	0.103952	0.0587873	-0.0658125	0.0578981
TCGA-G9-7509-01A	-0.278059	-0.105228	0.1777	0.11638	0.313447	0.269461	0.453316	0.172582	0.0635369	0.0843713	-0.111983	0.169587	-0.161771	0.328566	-0.0837266	-0.0302605	0.0152625	-0.0216488	0.419925	0.273414	-0.042296	-0.266041	0.357526	-0.097798	0.0632286	0.0104738	-0.111422	-0.00652188
TCGA-G9-7510-01A	-0.240792	-0.014039	0.208883	0.207048	0.335249	0.289566	0.497639	0.246087	0.0685348	0.132593	-0.0336882	0.189967	-0.0603506	0.337478	-0.0120073	0.0611141	0.191862	-0.0240901	0.408144	0.299416	0.024301	-0.242715	0.374611	0.0346915	0.126058	0.0717102	-0.0661734	0.0594877
TCGA-G9-7519-01A	-0.260829	-0.0630652	0.197077	0.152509	0.325019	0.272409	0.474796	0.225072	0.0625109	0.0562991	-0.0852714	0.221515	-0.0923178	0.315103	-0.0308207	0.0782021	0.0730396	-0.0569187	0.4091	0.268574	-0.0230745	-0.268273	0.350637	-0.0215878	0.0745421	0.0329545	-0.0783325	-0.00149206
TCGA-G9-7521-01A	-0.181609	0.10546	0.343132	0.225446	0.327757	0.253534	0.521228	0.263283	0.116542	0.175075	-0.0400741	0.196979	-0.000430106	0.311895	-0.0233306	0.111432	0.264443	-0.0364903	0.400676	0.30913	0.0173959	-0.311381	0.348442	0.0503175	0.134693	0.0948189	-0.125699	0.0740855
TCGA-G9-7522-01A	-0.212821	-0.0418563	0.219462	0.153706	0.342136	0.285098	0.493126	0.21349	0.0918415	0.115176	-0.0289592	0.17915	-0.114082	0.369122	-0.0269579	0.0615627	0.165299	-0.0185753	0.431321	0.277685	0.00359163	-0.241097	0.385378	-0.00326476	0.104562	0.0658615	-0.0676543	0.0423216
TCGA-G9-7523-01A	-0.178825	0.0330441	0.30915	0.210059	0.342937	0.295432	0.534053	0.277366	0.176009	0.202805	-0.0580737	0.177259	-0.020852	0.355905	0.031134	0.133218	0.294944	0.0178975	0.397006	0.385969	0.103683	-0.289658	0.406086	0.097245	0.193436	0.144978	-0.0562794	0.0812456
TCGA-G9-7525-01A	-0.305438	-0.10633	0.181516	0.129191	0.323739	0.259471	0.46589	0.201511	0.0796897	0.0970998	-0.158547	0.188475	-0.140891	0.362352	-0.044027	-0.0554533	0.106162	0.00232901	0.44483	0.264421	0.00143656	-0.230975	0.341914	-0.0284407	0.105698	0.0196387	-0.0616818	0.0233175
TCGA-G9-A9S0-01A	-0.211177	0.0269562	0.298261	0.201048	0.338407	0.237362	0.489077	0.21378	0.067136	0.0758928	-0.196063	0.225484	-0.115242	0.299036	-0.0593845	-0.102777	0.146923	0.0274664	0.432513	0.228735	-0.0180781	-0.279525	0.340364	-0.0432039	0.0967812	0.0567264	-0.0597178	0.00524019
TCGA-G9-A9S7-01A	-0.239775	-0.0445889	0.227963	0.162459	0.347369	0.321855	0.442181	0.187344	0.0844364	0.0663813	-0.124204	0.153883	-0.134453	0.306138	-0.0484116	-0.0818848	0.0610571	-0.04757	0.407027	0.221271	-0.0434079	-0.256966	0.383781	-0.0627727	0.0775064	0.0119009	-0.115102	0.00894746
TCGA-H9-7775-01A	-0.330405	-0.112775	0.147479	0.125749	0.31957	0.254604	0.474497	0.233694	0.0612768	0.0605556	-0.17366	0.168876	-0.0943761	0.354232	-0.0385493	-0.0605952	0.101082	-0.00910935	0.415393	0.252617	-0.0201608	-0.261555	0.3797	-0.0342281	0.0833634	0.0261447	-0.108739	-0.0155591
TCGA-H9-A6BX-01A	-0.128277	-0.0826468	0.208232	0.225117	0.358093	0.305564	0.524001	0.263284	0.0959347	0.150687	-0.148279	0.186305	-0.0703192	0.373409	0.0219157	0.0602744	0.259514	0.00260876	0.404361	0.356792	0.0444115	-0.277204	0.431473	0.073998	0.143377	0.115381	-0.0872911	0.0624095
TCGA-H9-A6BY-01A	-0.325409	-0.136028	0.187775	0.0729636	0.310443	0.281145	0.40945	0.161075	0.0437844	0.0610801	-0.227158	0.157314	-0.221821	0.310117	-0.0491216	-0.109299	0.0155758	-0.0340613	0.414785	0.201307	-0.0713791	-0.26645	0.345796	-0.113942	0.0466989	-0.0113139	-0.110186	-0.0489437
TCGA-HC-7075-01A	-0.111785	0.0185507	0.237564	0.150674	0.31915	0.27635	0.463485	0.20899	0.0762517	0.0395392	-0.088314	0.201833	0.00208393	0.318918	-0.0520203	-0.0221917	0.116355	-0.0230213	0.436494	0.226083	-0.0349759	-0.229486	0.321886	-0.0394925	0.0736218	0.033542	-0.0763314	-0.0141849
TCGA-HC-7077-01A	-0.291891	-0.0844954	0.163189	0.116969	0.316094	0.311823	0.411785	0.189153	0.0328524	0.00859802	-0.129193	0.16669	-0.202541	0.309538	-0.0828583	-0.113419	0.00722701	-0.0102588	0.424662	0.216519	-0.0842875	-0.261573	0.354265	-0.0695107	0.042543	-0.0164127	-0.109022	-0.0221111
TCGA-HC-7078-01A	-0.248741	-0.0142446	0.219617	0.202738	0.332634	0.303026	0.47914	0.239742	0.077269	0.122918	-0.136228	0.216957	-0.0772291	0.315763	0.00711216	0.0145945	0.200063	-0.0321393	0.412567	0.282617	-0.0108168	-0.222333	0.36801	-0.0101733	0.0874761	0.0334399	-0.0727613	0.00355628
TCGA-HC-7079-01A	0.36339	0.284004	0.493964	0.349816	0.39407	0.349896	0.617263	0.322716	0.171813	0.402391	0.052527	0.257453	0.378089	0.38518	0.187295	0.157545	0.569885	0.125066	0.466958	0.417964	0.131155	-0.154084	0.473479	0.312529	0.268356	0.26805	0.0233428	0.173639
TCGA-HC-7080-01A	-0.306411	-0.108069	0.141069	0.132298	0.321292	0.262025	0.424285	0.18908	0.0714558	0.0256931	-0.178609	0.153515	-0.186706	0.292544	-0.0680342	0.0434567	0.049624	-0.00457885	0.41336	0.208019	-0.0676175	-0.22432	0.34236	-0.05578	0.0545755	-0.0405211	-0.101597	0.00277614
TCGA-HC-7081-01A	-0.26441	-0.0341583	0.194526	0.186943	0.31239	0.292831	0.497494	0.297877	0.0881257	0.186503	-0.176734	0.188451	-0.0387431	0.367508	0.0330843	0.0181212	0.291245	0.0765912	0.445232	0.315863	0.0547947	-0.205793	0.397911	0.145392	0.142983	0.0817338	-0.0832558	0.055752
TCGA-HC-7209-01A	-0.265426	0.0214748	0.185041	0.204929	0.324118	0.279961	0.457227	0.236085	0.0582229	0.102331	-0.00164178	0.162471	-0.130639	0.365486	-0.0523889	0.0588903	0.119182	0.0268992	0.425429	0.297765	-0.00571371	-0.171458	0.348054	-0.00824287	0.0990015	0.0521509	-0.0693535	0.0638996
TCGA-HC-7210-01A	-0.141385	0.0439008	0.215364	0.190428	0.303274	0.282764	0.486217	0.262547	0.0980694	0.156533	0.0514306	0.168306	-0.0199945	0.321036	0.0123078	0.0809291	0.254905	0.0222197	0.443091	0.320457	0.0171488	-0.193223	0.393406	0.140854	0.155284	0.0941333	-0.0957232	0.0771499
TCGA-HC-7211-01A	-0.223107	0.0212691	0.162324	0.219969	0.339923	0.26662	0.459385	0.276647	0.108319	0.134176	0.113954	0.156768	-0.10979	0.3706	-0.0159868	0.128981	0.235206	0.00722919	0.393844	0.277343	0.0115891	-0.168432	0.388109	0.0599253	0.104727	0.0510084	-0.0597057	0.0350765
TCGA-HC-7212-01A	-0.321047	-0.0713799	0.151456	0.139199	0.303483	0.260071	0.442873	0.222909	0.0925746	0.0903467	-0.0768044	0.147714	-0.104843	0.319832	-0.0316846	0.00957829	0.0854569	0.0190058	0.436301	0.247339	-0.0436358	-0.229684	0.35193	0.0327402	0.0892995	0.00657922	-0.107687	0.025475
TCGA-HC-7213-01A	-0.225941	0.0265193	0.17341	0.23114	0.331075	0.260283	0.467853	0.20281	0.0816501	0.105071	-0.0884138	0.191032	-0.0507954	0.345823	-0.0117227	0.0383397	0.232978	0.0400399	0.382177	0.254677	-0.000301105	-0.211127	0.371475	0.0431874	0.0988416	0.041911	-0.103087	0.0510347
TCGA-HC-7230-01A	-0.322827	-0.072633	0.166685	0.116257	0.295864	0.25622	0.436039	0.199847	0.0656194	0.0373246	-0.075855	0.177118	-0.186653	0.316899	-0.0514403	-0.0547927	0.0251494	0.00132418	0.436337	0.215062	-0.0530714	-0.216865	0.340127	-0.0608383	0.0893127	0.00978779	-0.13146	0.000289812
TCGA-HC-7231-01A	-0.206816	-0.0156883	0.252169	0.225213	0.332558	0.244892	0.501743	0.225141	0.108492	0.126762	-0.134579	0.169267	-0.0570613	0.339594	-0.0237933	-0.0414272	0.164955	0.00518381	0.441699	0.278411	-0.0321498	-0.205456	0.359282	2.24819e-05	0.0912539	0.0496511	-0.126169	-0.00699143
TCGA-HC-7232-01A	-0.337004	-0.15849	0.164535	0.128011	0.340822	0.262695	0.472816	0.205581	0.126758	0.0510249	-0.132658	0.166277	-0.127235	0.31915	-0.0609045	-0.0744599	0.0880377	-0.0217537	0.417245	0.283216	-0.02765	-0.242102	0.370616	0.0020157	0.0885689	0.0408576	-0.107875	0.0263589
TCGA-HC-7233-01A	-0.176016	0.0474741	0.300348	0.250768	0.341875	0.277291	0.523883	0.266058	0.0911957	0.182708	-0.0624137	0.214448	0.0127876	0.346006	0.0174712	0.102747	0.295448	0.012457	0.379594	0.321558	0.0193523	-0.222339	0.364655	0.0913999	0.159895	0.104637	-0.0633667	0.0688538
TCGA-HC-7736-01A	-0.241829	0.0454098	0.198554	0.191637	0.305119	0.292132	0.498602	0.267776	0.072307	0.0960388	0.00395377	0.162104	-0.0694122	0.295404	-0.0162712	0.150977	0.20826	0.0156938	0.408461	0.308891	0.00635067	-0.205475	0.359385	0.0578736	0.130904	0.0627076	-0.0703349	0.0713928
TCGA-HC-7737-01A	-0.116212	0.105441	0.282597	0.201916	0.323369	0.311552	0.52301	0.262237	0.0773321	0.159466	0.0419868	0.197606	-0.0094185	0.327463	0.00929593	0.0979158	0.219974	0.0112454	0.441032	0.337647	0.0496268	-0.236704	0.41402	0.0601158	0.159139	0.110335	-0.0864477	0.0986507
TCGA-HC-7738-01A	-0.254064	-0.043561	0.178181	0.183218	0.312271	0.268381	0.456904	0.206182	0.0545439	0.0162009	-0.170017	0.249109	-0.0491501	0.325336	-0.0436043	-0.0913482	0.0626165	-0.0219815	0.403948	0.251254	-0.0345208	-0.28093	0.359995	-0.0127272	0.0756778	0.00271319	-0.102029	0.0287912
TCGA-HC-7740-01A	-0.19228	-0.0270106	0.193133	0.193844	0.33808	0.304763	0.50475	0.271253	0.064528	0.138342	5.08023e-06	0.16982	-0.0389251	0.345513	-0.00622457	0.112292	0.21548	0.012261	0.414745	0.354657	0.0190977	-0.204061	0.396784	-0.0106973	0.123755	0.073263	-0.0506125	0.0632977
TCGA-HC-7742-01A	-0.290758	-0.0671472	0.167255	0.159994	0.328722	0.253934	0.470679	0.217851	0.110688	0.0261242	-0.135021	0.185999	-0.134911	0.303775	-0.0611166	-0.0314901	0.0727776	-0.0163127	0.395316	0.271237	-0.00236613	-0.273677	0.365979	-0.0207465	0.0984153	0.0294177	-0.128287	0.0332605
TCGA-HC-7744-01A	-0.28252	-0.0433722	0.14056	0.145037	0.335228	0.232896	0.446566	0.206703	0.0680527	0.0177044	-0.12491	0.17865	-0.184515	0.317205	-0.0603907	-0.0181273	0.0210327	0.0526759	0.4305	0.231313	-0.0354993	-0.205643	0.332015	-0.0529294	0.0727661	0.00298552	-0.106237	0.012576
TCGA-HC-7745-01A	-0.15535	0.0102769	0.28655	0.202487	0.342397	0.304714	0.532368	0.248751	0.077554	0.155253	-0.029278	0.153803	-0.0457033	0.383125	0.0189877	0.0801609	0.269114	0.0410052	0.409951	0.330235	0.0172328	-0.263089	0.406706	0.0361239	0.118762	0.0845533	-0.0467648	0.0358126
TCGA-HC-7747-01A	-0.11939	-0.00490512	0.28384	0.241732	0.355968	0.279073	0.522656	0.23367	0.0836876	0.148315	-0.108766	0.196818	-0.0523065	0.363358	0.0146072	-0.00539036	0.246209	0.013126	0.437063	0.316872	-0.00600126	-0.270251	0.359035	0.0177218	0.122791	0.0641421	-0.050446	0.0232935
TCGA-HC-7748-01A	-0.223665	-0.00200309	0.214324	0.190592	0.311659	0.276937	0.485968	0.250353	0.0866587	0.153741	-0.0103991	0.157091	-0.0451926	0.339673	-0.00445066	0.083172	0.191515	0.0299383	0.430931	0.32284	-0.00143423	-0.19977	0.367775	0.0669546	0.121322	0.0709886	-0.0985496	0.0521121
TCGA-HC-7749-01A	-0.330959	-0.0855888	0.198683	0.173421	0.333306	0.26453	0.485236	0.244427	0.0769955	0.0862109	-0.112904	0.21323	-0.0783764	0.331743	-0.0235634	0.065585	0.140858	-0.00537658	0.427359	0.260124	-0.0205243	-0.29653	0.388414	0.0114079	0.0843907	0.0184446	-0.103906	0.011679
TCGA-HC-7750-01A	-0.187692	-0.108726	0.160189	0.172081	0.350791	0.280445	0.480918	0.233324	0.056129	0.0835343	-0.178569	0.221915	-0.103862	0.336905	-0.0418965	0.0121394	0.112971	-0.00327325	0.418811	0.301709	-0.0198974	-0.268973	0.401384	-0.0457422	0.090866	0.0448861	-0.0798701	0.0472983
TCGA-HC-7752-01A	-0.23055	-0.152277	0.181536	0.139242	0.315308	0.360752	0.44091	0.206992	0.0440981	0.0653842	-0.181266	0.17622	-0.163772	0.27316	-0.0128978	-0.0386416	0.134023	-0.0829647	0.415744	0.205995	-0.0276096	-0.193052	0.383966	-0.113753	0.0742808	-0.0256799	-0.128401	-0.0906762
TCGA-HC-7818-01A	-0.222792	-0.0633264	0.181136	0.208594	0.336237	0.279755	0.487949	0.255344	0.0867571	0.112689	-0.069635	0.173001	-0.115782	0.368818	0.020818	-0.00742614	0.244253	0.0056121	0.432674	0.296877	-0.00354293	-0.181724	0.375518	0.0461397	0.105998	0.0730268	-0.0653174	0.0362258
TCGA-HC-7819-01A	-0.299052	-0.0802022	0.167918	0.125021	0.303052	0.236118	0.434817	0.200512	0.0834957	0.0483913	-0.0462316	0.148502	-0.167263	0.318371	-0.0591912	-0.0683993	0.00660959	-0.021987	0.405549	0.197071	-0.0503258	-0.225886	0.353719	-0.0253214	0.0606291	0.0220961	-0.092704	0.0159653
TCGA-HC-7820-01A	-0.258507	-0.100261	0.20557	0.154908	0.326497	0.2853	0.436437	0.176202	0.0593662	0.0781884	-0.173889	0.168877	-0.16726	0.345271	-0.0806891	-0.118756	0.0325385	-0.0428808	0.401488	0.23057	-0.0616954	-0.235431	0.360747	-0.0900245	0.0493782	0.015301	-0.10157	-0.0365442
TCGA-HC-7821-01A	-0.177387	0.0329831	0.232721	0.179388	0.29742	0.274703	0.465339	0.22601	0.120413	0.191887	-0.0753218	0.129321	0.0143339	0.330481	0.0383183	-0.0383958	0.26566	-0.00537525	0.417836	0.30708	0.0234375	-0.212824	0.350742	0.0959342	0.11373	0.0762399	-0.122563	-0.00695172
TCGA-HC-8213-01A	-0.295159	-0.111178	0.173015	0.112057	0.336858	0.204939	0.440779	0.190372	0.0890306	0.043839	-0.0992901	0.17537	-0.174913	0.341051	-0.0527013	-0.10083	0.00949051	-0.0249601	0.430919	0.198232	-0.0552854	-0.23331	0.333206	-0.0519311	0.052641	0.0184191	-0.104574	0.00885318
TCGA-HC-8216-01A	-0.236912	-0.000826927	0.261974	0.222751	0.329644	0.290644	0.496207	0.233601	0.094207	0.124076	-0.155585	0.252673	-0.0462895	0.335432	-0.00622873	0.0136469	0.197039	0.00844656	0.396702	0.293159	0.0127513	-0.305566	0.359509	0.0487804	0.104665	0.0457524	-0.077475	0.0220333
TCGA-HC-8256-01A	-0.256301	-0.0384043	0.23419	0.150683	0.330991	0.258417	0.450586	0.187455	0.0800096	0.05536	-0.183545	0.173735	-0.131286	0.318723	-0.0612917	-0.0586643	0.0466849	-0.0536329	0.402129	0.210443	-0.0647068	-0.260046	0.350584	-0.0557389	0.0602474	-0.00138196	-0.133096	0.0476891
TCGA-HC-8257-01A	-0.259126	-0.0559501	0.234504	0.183338	0.322211	0.251953	0.478125	0.21844	0.136677	0.0758127	-0.131499	0.13668	-0.122449	0.346853	-0.0471626	-0.0733863	0.134316	-0.0245811	0.428462	0.255471	-0.0481291	-0.269576	0.354806	-0.0368115	0.0717235	0.0278605	-0.144707	-0.016258
TCGA-HC-8258-01A	-0.208041	-0.0201352	0.212536	0.197904	0.321313	0.296	0.473358	0.206172	0.0591363	0.119073	-0.0653147	0.187024	-0.105509	0.340491	-0.0297186	0.0176049	0.143929	-0.00902003	0.42058	0.291445	-0.0420545	-0.25209	0.374438	-0.0666765	0.0829028	0.0458052	-0.0777661	0.040588
TCGA-HC-8259-01A	-0.295906	-0.114278	0.172451	0.101454	0.30246	0.281666	0.43279	0.173764	0.0876024	0.0536509	-0.161695	0.194585	-0.137907	0.343798	-0.0689994	-0.147595	-0.00349674	-0.0126961	0.434303	0.228996	-0.0690013	-0.254769	0.345609	-0.0640871	0.0476057	0.00247084	-0.132258	-0.00440711
TCGA-HC-8260-01A	-0.246003	-0.0773304	0.190548	0.175211	0.313342	0.285538	0.494695	0.204254	0.0742195	0.130086	-0.0932097	0.147775	-0.143039	0.374108	-0.0318215	-0.00369782	0.126592	0.00261416	0.417647	0.27922	-0.0408291	-0.267606	0.368991	-0.0497495	0.0686271	0.0284199	-0.101452	0.0185799
TCGA-HC-8261-01A	-0.206629	-0.0267361	0.240929	0.215467	0.312796	0.2544	0.468631	0.236744	0.0542033	0.105239	-0.209539	0.20187	-0.046728	0.299673	3.48093e-05	-0.059413	0.166062	-0.000652121	0.42738	0.300745	-0.0289848	-0.249813	0.342831	-0.0153494	0.0775133	0.0275867	-0.0950365	0.0188232
TCGA-HC-8262-01A	-0.302652	-0.0843192	0.185631	0.160415	0.318899	0.263729	0.458301	0.192351	0.0802873	0.0736631	-0.203546	0.164667	-0.093518	0.349032	-0.0881088	-0.101451	0.0616355	0.0373938	0.426444	0.270087	-0.0735559	-0.233716	0.361626	-0.06191	0.0561765	0.00684039	-0.0592168	0.0250668
TCGA-HC-8265-01A	-0.260223	-0.0391241	0.229447	0.197703	0.3388	0.296826	0.485942	0.221935	0.0693679	0.120682	-0.155442	0.203904	-0.117425	0.314224	-0.0257848	-0.011469	0.165263	-0.0277966	0.412884	0.30496	0.00252254	-0.315256	0.377269	-0.0235754	0.0916417	0.0535926	-0.104929	-0.0308511
TCGA-HC-8266-01A	-0.0391166	0.167286	0.458968	0.278201	0.356895	0.287465	0.565226	0.260538	0.121309	0.27291	-0.0864588	0.190072	0.112052	0.329785	0.0473644	0.0634103	0.386788	0.0458726	0.441064	0.378979	0.0505418	-0.259903	0.412083	0.153782	0.17381	0.138723	-0.0704171	0.0756809
TCGA-HC-A48F-01A	-0.350972	-0.143117	0.0910554	0.0918664	0.321413	0.284174	0.436058	0.173849	0.0740679	0.00234497	-0.148279	0.141276	-0.178347	0.307708	-0.0760935	0.0160901	0.0292709	-0.0452501	0.40122	0.209403	-0.0497725	-0.24417	0.365245	-0.0397388	0.0213563	-0.0435047	-0.10004	-0.010526
TCGA-HC-A4ZV-01A	-0.0858902	0.191624	0.319825	0.192692	0.316807	0.324798	0.481112	0.223723	0.120917	0.169119	-0.0859153	0.219492	0.0737393	0.300829	-0.00662189	0.0204313	0.265534	0.0309603	0.388749	0.27195	0.00776033	-0.301921	0.404999	0.0402234	0.102635	0.0555942	-0.132403	0.0710293
TCGA-HC-A631-01A	-0.356409	-0.0477183	0.158762	0.12854	0.338561	0.279144	0.426319	0.208505	0.0722074	0.0256304	-0.167706	0.167655	-0.142752	0.321433	-0.0589443	-0.125544	0.0341771	0.0159	0.421624	0.221322	-0.0692287	-0.2701	0.362796	-0.0617012	0.0551814	0.00898493	-0.120367	-0.0153544
TCGA-HC-A632-01A	0.0624164	0.111482	0.356391	0.180719	0.343578	0.254761	0.513971	0.279649	0.114313	0.229091	-0.154757	0.186826	0.133644	0.348483	0.0220923	0.0111912	0.269066	0.0677928	0.372632	0.313509	0.0218538	-0.258049	0.391801	0.051962	0.131099	0.114479	-0.100811	0.0345605
TCGA-HC-A6AL-01A	-0.189212	-0.0236755	0.266157	0.195559	0.308617	0.300229	0.470416	0.231152	0.109199	0.0995601	-0.0819226	0.238669	-0.0474387	0.288726	0.0404072	0.0076854	0.243086	-0.0370474	0.435097	0.259579	-0.00742975	-0.236103	0.37815	0.0698655	0.12228	0.0469691	-0.0742689	-0.00306828
TCGA-HC-A6AN-01A	-0.228315	-0.101972	0.258083	0.168781	0.32016	0.328735	0.438733	0.211265	0.0594234	0.0878188	-0.118075	0.209869	-0.148951	0.305808	0.042401	-0.0528873	0.169225	-0.0341904	0.437234	0.240624	-0.0275547	-0.224751	0.36201	0.0164185	0.11122	0.0285977	-0.0818185	-0.039263
TCGA-HC-A6AO-01A	-0.189843	0.0202211	0.278492	0.243481	0.341308	0.312198	0.448796	0.240922	0.0705552	0.148219	-0.143487	0.213071	-0.0915799	0.337405	0.105976	0.0822716	0.3354	-0.0670956	0.454265	0.249172	0.0144886	-0.12669	0.394817	0.0754534	0.107177	0.0597425	-0.0538603	0.0164884
TCGA-HC-A6AP-01A	-0.17139	-0.0797645	0.281353	0.217026	0.356954	0.324504	0.470371	0.22448	0.0718488	0.140596	-0.151859	0.259609	-0.0652322	0.318404	0.065436	0.0904422	0.255222	-0.0356815	0.421449	0.273042	0.0307588	-0.22333	0.404133	0.118483	0.136866	0.0706315	-0.0649113	0.00281628
TCGA-HC-A6AQ-01A	-0.204235	-0.124597	0.270477	0.149336	0.343421	0.31385	0.449574	0.187662	0.0634461	0.072789	-0.128315	0.18124	-0.127561	0.325939	-0.000293635	-0.0296566	0.105562	-0.0370987	0.423549	0.227318	-0.0280205	-0.217636	0.373531	-0.0526519	0.0676532	0.0241178	-0.0783414	-0.0381643
TCGA-HC-A6AS-01A	-0.184228	-0.0272009	0.302029	0.184893	0.32847	0.31952	0.486184	0.242668	0.0660973	0.182748	0.0207876	0.221786	-0.060424	0.336914	0.0896207	0.158906	0.333885	-0.00933644	0.425353	0.310057	0.0404469	-0.224702	0.393754	0.119788	0.152183	0.0909365	-0.0242287	0.0269268
TCGA-HC-A6HX-01A	-0.232531	-0.107149	0.23741	0.156815	0.31835	0.342578	0.443273	0.20254	0.0590384	0.142775	-0.05678	0.161628	-0.145611	0.302723	0.00809065	-0.0108566	0.184485	-0.0363393	0.416503	0.290948	-0.00492473	-0.272602	0.384327	-0.0544885	0.102688	0.0263379	-0.0230345	-0.00484807
TCGA-HC-A6HY-01A	-0.288912	-0.0901736	0.242781	0.142866	0.327757	0.292234	0.425044	0.18275	0.0675143	0.0620426	-0.186031	0.167382	-0.200833	0.286477	-0.0321237	-0.0446989	0.0542001	-0.0248219	0.419836	0.224798	-0.052899	-0.23323	0.363071	-0.0696511	0.0646956	0.00854551	-0.101347	-0.0291542
TCGA-HC-A76W-01A	-0.283191	-0.0404609	0.186804	0.180139	0.318022	0.290021	0.513716	0.242705	0.0707679	0.116034	-0.0810886	0.187351	-0.110577	0.323794	0.00787532	0.0734145	0.192094	-0.00949287	0.364978	0.327719	0.0521736	-0.22527	0.375064	0.0181941	0.114516	0.0534094	-0.104524	0.0526015
TCGA-HC-A76X-01A	-0.359405	-0.101195	0.151643	0.0803869	0.298712	0.252601	0.422936	0.187733	0.0744364	0.0172636	-0.120577	0.145463	-0.213808	0.323796	-0.0564065	-0.0461055	-0.0170586	-0.0109827	0.421356	0.203257	-0.055594	-0.231326	0.333782	-0.0654248	0.0392329	-0.00858846	-0.129209	0.00448775
TCGA-HC-A8CY-01A	-0.155415	0.0359153	0.305677	0.169	0.280911	0.238771	0.453384	0.194217	0.0944816	0.13619	-0.0538626	0.193223	0.024057	0.297354	-0.0161165	-0.0149216	0.209446	-0.0629312	0.422602	0.251039	-0.0276106	-0.293648	0.36934	0.0194863	0.0952638	0.0338287	-0.098896	-0.0144533
TCGA-HC-A8D0-01A	-0.165622	-0.0145644	0.242307	0.190932	0.337756	0.279905	0.505418	0.238181	0.0854684	0.155128	-0.156235	0.186519	-0.0630047	0.368723	0.0142417	0.0128396	0.210135	0.0500327	0.412557	0.283267	0.00559717	-0.252259	0.399521	0.0116578	0.11764	0.0778671	-0.0979328	0.0319598
TCGA-HC-A8D1-01A	-0.213251	0.00296067	0.248994	0.1918	0.335731	0.290834	0.502378	0.220519	0.0714108	0.168816	-0.00122068	0.171429	-0.0931634	0.378076	-0.019935	0.0387177	0.169023	0.0206822	0.409795	0.312893	-0.0182951	-0.282372	0.389088	0.00110495	0.106505	0.0848142	-0.0574434	0.0394104
TCGA-HC-A9TE-01A	-0.107809	0.0509584	0.30578	0.188718	0.36099	0.356274	0.5419	0.241658	0.0957534	0.162959	-0.0846902	0.227618	0.014646	0.319995	0.0253296	0.0417975	0.300598	0.00328187	0.440464	0.297212	0.0492675	-0.285916	0.409602	0.0770571	0.142973	0.0974832	-0.0513365	0.0353094
TCGA-HC-A9TH-01A	-0.306094	0.0282104	0.211548	0.195475	0.345861	0.289459	0.502454	0.251303	0.0755917	0.105763	-0.161835	0.236988	-0.0397201	0.318839	-0.0486071	-0.0365216	0.247732	0.000452597	0.406322	0.284214	-0.00322754	-0.263847	0.364808	0.0653825	0.0908661	0.0557212	-0.139485	0.0541555
TCGA-HI-7168-01A	-0.313649	-0.0842417	0.116458	0.13014	0.333599	0.306577	0.486888	0.217336	0.133717	0.0659422	-0.00170766	0.16258	-0.168729	0.302907	-0.0326929	0.02179	0.0524729	0.022944	0.371358	0.304884	0.0385881	-0.28517	0.397186	-0.0247845	0.0950067	0.0324319	-0.100033	0.0647335
TCGA-HI-7169-01A	-0.197959	-0.151062	0.184522	0.0934409	0.314604	0.293701	0.476701	0.199295	0.142269	0.0518406	-0.154734	0.15973	-0.167895	0.31731	-0.0112711	-0.00502589	0.0598099	-0.0863217	0.41141	0.292883	0.0170952	-0.212947	0.380624	-0.104194	0.107321	0.0670854	-0.0700681	-0.0247943
TCGA-HI-7170-01A	-0.176265	0.0569699	0.244755	0.235541	0.366089	0.325136	0.529182	0.286648	0.0835362	0.143867	-0.0361857	0.204402	-0.0596067	0.349025	0.0238937	0.137937	0.254466	0.0258102	0.401567	0.366652	0.0754084	-0.2286	0.42967	0.00765065	0.164793	0.121157	-0.0359248	0.0522352
TCGA-HI-7171-01A	-0.273646	-0.00730582	0.212136	0.130688	0.309595	0.222164	0.462649	0.200849	0.0721858	0.0881942	-0.122006	0.188586	-0.149309	0.318435	-0.0815579	-0.0614588	0.0585758	0.00135149	0.422237	0.248496	-0.0314794	-0.251664	0.336277	-0.0490531	0.0273791	-0.000754296	-0.100096	0.0487904
TCGA-J4-8198-01A	-0.30099	-0.0785225	0.168949	0.0967622	0.299273	0.240441	0.454697	0.203982	0.0899472	0.0949633	-0.0996048	0.137069	-0.12892	0.330743	-0.0568375	0.0124313	0.0579351	0.00442191	0.405582	0.283431	-0.0305134	-0.231838	0.35625	-0.0385517	0.0739872	0.0218304	-0.13083	0.038152
TCGA-J4-8200-01A	-0.289081	-0.0558907	0.166462	0.149259	0.333188	0.280849	0.487896	0.236993	0.106627	0.0839888	-0.0457071	0.233744	-0.0586253	0.317537	-0.0355594	0.0587445	0.11228	-0.0485861	0.389418	0.290956	0.01788	-0.245743	0.368247	-0.0170562	0.118336	0.0671637	-0.0907639	0.0084582
TCGA-J4-A67K-01A	-0.150289	-0.0084358	0.334623	0.228328	0.328608	0.294149	0.443414	0.207628	0.0728858	0.16563	-0.037223	0.188589	-0.0876466	0.326674	0.0100717	-0.0378666	0.253043	-0.00879697	0.419168	0.255078	-0.0192773	-0.213241	0.359642	0.00847526	0.0857482	0.0691496	-0.0940562	0.00527189
TCGA-J4-A67L-01A	-0.173391	-0.00077967	0.350214	0.219178	0.34288	0.328141	0.476653	0.204587	0.0684762	0.145041	-0.0569655	0.226587	-0.0926417	0.325174	0.0163062	-0.0175117	0.232993	0.00433757	0.44286	0.295535	-0.00285496	-0.254408	0.372505	0.0280019	0.122363	0.0842326	-0.0734363	0.01792
TCGA-J4-A67M-01A	-0.140191	-0.0357718	0.30643	0.207074	0.350855	0.336169	0.49743	0.233618	0.0992776	0.155471	-0.0521372	0.202553	-0.0720524	0.318605	0.0825129	0.0687651	0.314207	0.00548202	0.438491	0.323473	0.0279486	-0.201947	0.396214	0.0458511	0.143406	0.0831528	-0.0596232	0.0152211
TCGA-J4-A67N-01A	-0.247424	-0.0780368	0.287556	0.163523	0.345206	0.331145	0.444501	0.197459	0.107001	0.0973265	0.0253635	0.208231	-0.126574	0.288746	0.0345504	0.0470568	0.234863	-0.0256579	0.417177	0.235821	0.00313452	-0.207954	0.359436	0.0863532	0.104859	0.037667	-0.0538202	-0.0322833
TCGA-J4-A67O-01A	-0.141794	-0.0845226	0.234748	0.155998	0.312546	0.33475	0.45244	0.222194	0.0850542	0.158849	-0.0551691	0.215296	-0.100105	0.324186	0.0474549	0.130103	0.191784	-0.0547255	0.437222	0.291227	0.0342137	-0.21696	0.375082	0.00342696	0.111567	0.0869191	-0.0442916	-0.000298111
TCGA-J4-A67Q-01A	-0.119427	-0.0764981	0.283088	0.151152	0.348604	0.32389	0.492031	0.227343	0.0619484	0.158206	-0.0851702	0.182089	-0.0687236	0.306465	0.0369151	0.124817	0.262646	-0.0270713	0.412374	0.304634	0.0273251	-0.239147	0.398092	0.02617	0.122484	0.0857141	-0.0579804	0.0099677
TCGA-J4-A67R-01A	-0.0555938	-0.0308046	0.312621	0.222677	0.346405	0.34067	0.483493	0.19686	0.0726097	0.157351	-0.03921	0.18743	-0.0513554	0.32285	0.0328104	0.0426432	0.25058	-0.0017119	0.440465	0.311457	0.00372937	-0.223452	0.398229	0.0118895	0.129125	0.100889	-0.0559843	0.0108112
TCGA-J4-A67S-01A	-0.205243	-0.0504409	0.302087	0.177803	0.308919	0.328751	0.450807	0.186381	0.042699	0.149493	-0.0428053	0.171591	-0.146115	0.295449	-0.0262282	0.0334282	0.15781	-0.0508627	0.432403	0.234146	-0.0328505	-0.248662	0.360516	-0.0396554	0.0835191	0.0422039	-0.0460356	-0.0107859
TCGA-J4-A67T-01A	-0.251295	-0.0995171	0.188537	0.177013	0.328034	0.275392	0.494807	0.223544	0.0595145	0.102976	-0.060679	0.175107	-0.168622	0.347162	-0.00569297	0.039939	0.210791	-0.0167308	0.427328	0.282726	0.0287268	-0.169559	0.394478	-0.0454398	0.104173	0.0805344	-0.0732731	0.0499968
TCGA-J4-A6G1-01A	0.321762	0.219171	0.449756	0.283676	0.36213	0.324323	0.575729	0.253656	0.13377	0.259953	-0.0969328	0.218376	0.301082	0.359738	0.08148	0.100173	0.408495	0.118763	0.436308	0.350666	0.0337649	-0.214718	0.4176	0.111396	0.200746	0.186091	-0.0739357	0.0645937
TCGA-J4-A6G3-01A	-0.142983	0.159541	0.308466	0.259395	0.35625	0.314942	0.530779	0.264887	0.0739257	0.200953	0.0367172	0.184907	-0.0234463	0.325552	0.0381251	0.0985938	0.279993	0.0489923	0.400376	0.338007	0.0550691	-0.19681	0.392337	0.0493473	0.151649	0.107592	-0.0467575	0.118341
TCGA-J4-A6M7-01A	-0.333291	-0.108398	0.136192	0.091762	0.302189	0.260442	0.442499	0.182645	0.0597614	0.0362445	-0.143151	0.143205	-0.186681	0.320134	-0.0582118	-0.0185172	0.0162242	-0.0202989	0.430836	0.231524	-0.0279994	-0.240004	0.34578	-0.0601239	0.0727786	0.0245309	-0.14051	-0.0253834
TCGA-J4-A83I-01A	-0.217288	-0.00730799	0.212994	0.187684	0.330782	0.252888	0.458949	0.211698	0.082889	0.141154	-0.013309	0.162921	-0.117201	0.362028	-0.0510436	-0.00928958	0.130928	-0.00952514	0.399331	0.271385	-0.0417657	-0.262921	0.381436	0.00199941	0.0421175	0.0352367	-0.119483	0.00281373
TCGA-J4-A83J-01A	-0.2953	0.0242967	0.271694	0.204882	0.342327	0.296094	0.46218	0.21011	0.0531515	0.139658	0.0176163	0.2318	-0.0937448	0.318542	-0.0291887	0.189644	0.205648	-0.0297001	0.439574	0.28279	-0.0277008	-0.249043	0.358553	0.00428533	0.120292	0.0628025	-0.0912867	0.0918812
TCGA-J4-A83K-01A	-0.262973	-0.13104	0.148655	0.146069	0.331	0.27906	0.476443	0.195857	0.0521921	0.0673867	-0.0963344	0.155127	-0.173452	0.354819	-0.0457174	-0.0271333	0.064648	-0.0133155	0.413511	0.271509	-0.0206918	-0.243557	0.376369	-0.0398667	0.0821538	0.0462659	-0.0993406	-0.0253321
TCGA-J4-A83L-01A	-0.291605	-0.0848622	0.142286	0.162264	0.326853	0.273764	0.485311	0.229857	0.0599486	0.0424132	-0.0439082	0.158162	-0.138287	0.328001	-0.0607356	0.103538	0.113542	-0.0621596	0.409379	0.290068	-0.00326223	-0.183788	0.35426	-0.0430663	0.0934555	0.0616235	-0.0809844	-0.00516509
TCGA-J4-A83M-01A	-0.254273	-0.0447299	0.249354	0.145459	0.309197	0.263694	0.46836	0.200946	0.0434493	0.0839077	-0.0673892	0.16898	-0.0868677	0.29149	-0.0120132	0.0253664	0.123061	-0.0188281	0.428762	0.281663	-0.0229326	-0.240158	0.364085	-0.0306227	0.0965796	0.0438661	-0.0910107	-0.0222017
TCGA-J4-A83N-01A	-0.262261	-0.0251253	0.2067	0.160188	0.33929	0.265691	0.444333	0.195011	0.0711078	0.0744752	-0.0223673	0.186897	-0.171648	0.360933	-0.058031	-0.0313284	0.088026	-0.0149228	0.412848	0.245891	-0.032534	-0.224463	0.356417	-0.023342	0.0975819	0.0224749	-0.094002	0.00204284
TCGA-J4-AATV-01A	-0.209331	0.00775403	0.1872	0.229469	0.346886	0.309022	0.510913	0.231004	0.0704005	0.157342	0.00763309	0.175285	-0.0911257	0.369638	0.0177517	0.086249	0.247489	0.0408808	0.416203	0.33614	0.0301679	-0.163488	0.420976	0.00908995	0.147279	0.106839	-0.0187688	0.0518896
TCGA-J4-AATZ-01A	-0.327776	-0.0566783	0.148639	0.188019	0.329832	0.269926	0.449461	0.183509	0.0478914	0.0308348	0.00329257	0.118932	-0.158309	0.294396	-0.0599859	-0.0504963	0.115867	-0.0296078	0.423449	0.257547	-0.0717984	-0.267191	0.366741	-0.0574285	0.0582821	-0.000950837	-0.145406	0.0745049
TCGA-J4-AAU2-01A	-0.200108	-0.0225247	0.227984	0.121603	0.301974	0.305196	0.465551	0.198754	0.048874	0.0654396	-0.0631602	0.166116	-0.102741	0.304172	-0.0608899	0.00573606	0.105431	-0.0461458	0.406637	0.249315	-0.0286781	-0.249781	0.348308	-0.0851206	0.108403	0.0545683	-0.0712095	0.0173009
TCGA-J9-A52B-01A	-0.283518	-0.0250455	0.209452	0.183698	0.312607	0.28908	0.467994	0.204064	0.0966318	0.078449	-0.0955927	0.167113	-0.151239	0.304214	-0.0207639	-0.0184709	0.162296	-0.0466678	0.40703	0.274636	-0.0318945	-0.249488	0.356626	0.0299961	0.104219	0.0263458	-0.135742	0.0568746
TCGA-J9-A52C-01A	-0.22362	0.0256226	0.291992	0.206711	0.369198	0.307236	0.531699	0.259027	0.111211	0.20867	0.0151167	0.177555	-0.0635917	0.376432	0.0813118	0.185663	0.307809	0.0303556	0.404673	0.369824	0.0907727	-0.222626	0.417747	0.115861	0.181648	0.108124	-0.0940966	0.082635
TCGA-J9-A52D-01A	-0.339192	-0.0285464	0.164428	0.106349	0.297171	0.172572	0.427826	0.228699	0.063384	-0.0429692	-0.206694	0.189658	-0.113254	0.261067	-0.122872	-0.156249	-0.0320342	0.0326166	0.375944	0.172598	-0.0787055	-0.20911	0.325082	-0.0977736	0.0381118	-0.0268043	-0.108374	0.0274222
TCGA-J9-A52E-01A	-0.260581	0.0237481	0.26178	0.191639	0.322931	0.304464	0.489354	0.232761	0.117867	0.152291	-0.186789	0.249321	-0.0422539	0.314415	-0.0232894	-0.0913566	0.246823	0.0899525	0.361633	0.314375	0.0423344	-0.316324	0.366234	0.066014	0.0974553	0.0798602	-0.0775417	0.102486
TCGA-J9-A8CK-01A	-0.291508	-0.0616134	0.159434	0.154402	0.32552	0.315923	0.492322	0.224454	0.0967423	0.137123	-0.0290699	0.140557	-0.157641	0.347632	-0.00121464	0.0676078	0.162731	0.0400807	0.406352	0.295648	0.0195209	-0.255763	0.394044	0.00932613	0.106639	0.0393356	-0.0989697	0.0106401
TCGA-J9-A8CL-01A	-0.193695	0.0145778	0.233716	0.208091	0.322245	0.306857	0.513975	0.244881	0.11811	0.167548	-0.262883	0.206734	0.00861791	0.316112	-0.00496225	-0.071693	0.243673	0.0392017	0.406429	0.294744	0.0294274	-0.307106	0.362933	0.0671562	0.102492	0.0586427	-0.092959	0.000165804
TCGA-J9-A8CM-01A	-0.267358	-0.0542491	0.199322	0.155036	0.330853	0.291594	0.496274	0.233859	0.0853586	0.110123	-0.116358	0.185742	-0.0886613	0.335612	0.0155941	0.0161137	0.208874	0.0624431	0.38657	0.296307	0.0129858	-0.28726	0.393467	0.0492422	0.0741414	0.0763363	-0.142522	0.0477002
TCGA-J9-A8CN-01A	-0.257578	0.0157672	0.190968	0.130454	0.311091	0.25373	0.447999	0.208848	0.0791218	0.0605928	0.0194085	0.15713	-0.154827	0.30972	-0.0251348	0.0636989	0.135483	-0.0507194	0.410156	0.229807	-0.00448631	-0.184706	0.35935	-0.0550999	0.11096	0.0379488	-0.0768382	0.0429247
TCGA-J9-A8CP-01A	-0.227536	-0.0551461	0.170922	0.16414	0.358864	0.274933	0.466756	0.229438	0.0800823	0.0816156	-0.0614393	0.187544	-0.0791599	0.357422	-0.0380689	0.160153	0.0897443	0.00650314	0.414225	0.289382	-0.00898068	-0.225302	0.397661	-0.0288865	0.112955	0.0463683	-0.0793486	0.0694646
TCGA-KC-A4BL-01A	-0.184927	-0.01322	0.22424	0.22809	0.3476	0.323444	0.496598	0.235349	0.0736795	0.131424	-0.0362727	0.162052	-0.0625963	0.361934	-0.0180093	0.0897548	0.203992	0.0129244	0.396016	0.343407	0.0434132	-0.266541	0.401744	-0.0100933	0.128064	0.0834214	-0.0650816	0.0622735
TCGA-KC-A4BN-01A	-0.273696	-0.0841475	0.172739	0.159771	0.304311	0.286346	0.460272	0.183401	0.0343974	0.0807834	-0.0393783	0.165755	-0.188587	0.332653	-0.0719252	-0.0171055	0.102272	-0.0230849	0.450679	0.232271	-0.0170482	-0.21598	0.343323	-0.0965459	0.0749857	0.0422824	-0.0873175	0.0483646
TCGA-KC-A4BR-01A	-0.265132	-0.0693733	0.133081	0.147127	0.320893	0.334011	0.486012	0.232919	0.0881535	0.144895	-0.00993795	0.138707	-0.176905	0.355892	-0.00266648	0.165123	0.18402	-0.00455225	0.40257	0.32182	0.0373569	-0.132198	0.414271	-0.00861485	0.142907	0.112275	-0.0636259	0.0439827
TCGA-KC-A4BV-01A	-0.270738	-0.0261955	0.258619	0.168357	0.314418	0.262959	0.505514	0.205957	0.0929219	0.124956	-0.0860065	0.166591	-0.0811839	0.333846	-0.0467718	-0.0114165	0.178903	-0.000720006	0.368736	0.314303	-0.00321275	-0.289899	0.391308	0.00982316	0.0986783	0.0596262	-0.117027	0.0363037
TCGA-KC-A7F3-01A	-0.258302	-0.0268308	0.187821	0.175877	0.326224	0.277971	0.474877	0.217574	0.0681842	0.0856738	-0.0743109	0.171449	-0.182247	0.323053	-0.0277183	0.0201237	0.127402	0.00657292	0.409246	0.285747	0.00221791	-0.217617	0.365294	-0.0707136	0.103483	0.0604228	-0.0651932	0.0601177
TCGA-KC-A7F5-01A	-0.366591	-0.0734738	0.1641	0.0922943	0.313012	0.322962	0.414491	0.144176	0.0338651	-0.0313938	-0.158167	0.198873	-0.221671	0.25164	-0.114742	-0.0615423	-0.0465045	-0.0677194	0.420194	0.184738	-0.0832078	-0.295436	0.360704	-0.122441	0.0217343	-0.055287	-0.0531494	0.0351076
TCGA-KC-A7F6-01A	-0.254726	-0.0519254	0.202154	0.150352	0.316502	0.300955	0.475281	0.198767	0.0538143	0.108328	-0.0762877	0.163445	-0.148377	0.333866	-0.0415638	-0.00201134	0.0943871	0.00127875	0.414039	0.255817	0.00837064	-0.256072	0.397161	-0.0876077	0.102266	0.0471522	-0.104458	0.00528923
TCGA-KC-A7FA-01A	-0.276003	-0.053478	0.232872	0.160203	0.332231	0.296183	0.455278	0.208554	0.0766374	0.0909869	-0.0747537	0.219059	-0.152965	0.298301	0.00122876	0.00383803	0.140721	-0.061194	0.383294	0.249228	-0.0083832	-0.217333	0.366763	-0.0294131	0.110883	0.0456104	-0.103981	0.0042853
TCGA-KC-A7FD-01A	-0.300394	-0.0844641	0.191545	0.135496	0.325399	0.243831	0.441777	0.19626	0.0568163	0.0458546	-0.134938	0.19033	-0.182785	0.300795	-0.0294676	0.0046744	0.116087	-0.0520274	0.422944	0.221851	-0.00969655	-0.229377	0.355238	-0.0531696	0.0823258	0.0290721	-0.0826115	0.00868732
TCGA-KC-A7FE-01A	-0.182345	-0.0925908	0.167853	0.177182	0.352824	0.295907	0.500574	0.227177	0.0944286	0.10709	-0.123515	0.177295	-0.12991	0.347968	-0.0113834	0.0592429	0.151634	0.00505531	0.409059	0.328056	0.015488	-0.269281	0.411253	-0.0197252	0.120429	0.0650161	-0.0820071	0.0233962
TCGA-KK-A59V-01A	0.101149	0.342219	0.552948	0.266577	0.337814	0.306877	0.582571	0.2487	0.148563	0.289839	0.0157713	0.283001	0.129088	0.31509	0.0452896	0.012721	0.42112	0.0616866	0.415907	0.31731	0.0446365	-0.258773	0.384991	0.0651426	0.173121	0.164876	-0.0736863	0.133971
TCGA-KK-A59X-01A	-0.298385	-0.00821138	0.187172	0.16111	0.330058	0.267438	0.450732	0.227745	0.107005	0.058914	-0.146974	0.193938	-0.0946896	0.316393	-0.0294931	-0.0273622	0.155974	-0.0243009	0.43144	0.251421	0.0131522	-0.22632	0.335261	-0.0272118	0.102267	0.0137791	-0.0858691	0.0481537
TCGA-KK-A59Y-01A	-0.225479	-0.0788537	0.179732	0.143291	0.324105	0.279725	0.438189	0.178132	0.0545013	0.0404506	-0.0661712	0.157565	-0.123962	0.343342	-0.0580303	-0.0295678	0.0766256	-0.0707817	0.413417	0.213427	-0.0462092	-0.243641	0.371082	-0.0906115	0.0511843	0.0150194	-0.0876008	-0.00391827
TCGA-KK-A59Z-01A	-0.296968	-0.0226843	0.174646	0.188126	0.309328	0.249099	0.497935	0.279701	0.0711937	0.128202	0.0728805	0.170644	-0.0667741	0.326618	0.00246588	0.0742031	0.235381	0.0104128	0.424102	0.300719	0.0403054	-0.235058	0.383861	0.0361393	0.127964	0.0724487	-0.0912985	0.0262961
TCGA-KK-A5A1-01A	-0.243926	0.049577	0.232528	0.19089	0.322033	0.217113	0.464815	0.265897	0.109538	0.101761	-0.133627	0.195315	-0.048341	0.293866	-0.00107165	-0.0250942	0.188842	0.0356811	0.391453	0.286734	-0.0231709	-0.307605	0.325755	0.0260131	0.102274	0.0400989	-0.119011	0.00128474
TCGA-KK-A6DY-01A	-0.266594	-0.0047788	0.224606	0.240317	0.330234	0.29806	0.478687	0.238718	0.0744416	0.139287	0.00666019	0.146077	-0.0974287	0.324553	-0.0231651	0.0370544	0.185353	0.00367049	0.409313	0.293683	0.00279246	-0.214337	0.385333	0.0246871	0.109176	0.0656035	-0.111061	0.0605636
TCGA-KK-A6E0-01A	-0.268893	-0.0339347	0.195919	0.189856	0.353525	0.259203	0.454813	0.18035	0.08676	0.0106946	-0.138851	0.163959	-0.172954	0.29732	-0.0603806	-0.0648592	0.0625892	-0.0279841	0.421842	0.215113	-0.0506014	-0.249256	0.35623	-0.0812588	0.0899095	-0.00154963	-0.0733463	0.058303
TCGA-KK-A6E1-01A	-0.329748	0.0134156	0.181089	0.165894	0.335775	0.281798	0.450193	0.199063	0.0503938	0.0542932	-0.0887326	0.169017	-0.184676	0.309897	-0.0723721	-0.0151825	0.0677331	0.000912818	0.375957	0.244217	-0.0508654	-0.249388	0.342304	-0.0372367	0.0690073	0.00405181	-0.127304	0.0544399
TCGA-KK-A6E2-01A	-0.22534	-0.0252666	0.208652	0.110744	0.313488	0.251311	0.430411	0.19574	0.0913135	0.0633851	-0.107104	0.138764	-0.10585	0.314396	-0.06009	-0.0612164	0.0675099	0.0177327	0.43988	0.260518	-0.046274	-0.259623	0.342499	0.00316827	0.0700381	0.020931	-0.156882	-0.0237805
TCGA-KK-A6E3-01A	-0.117745	-0.0229426	0.323058	0.154256	0.343351	0.296959	0.495202	0.253578	0.0694107	0.153178	-0.0850535	0.214182	-0.0400967	0.319905	0.0227069	0.0660367	0.286364	-0.0680676	0.42169	0.30118	0.0298232	-0.217716	0.381459	0.0556606	0.123413	0.0920181	-0.0312726	0.0167584
TCGA-KK-A6E4-01A	-0.192223	-0.0457162	0.261897	0.122525	0.304368	0.24377	0.401267	0.186065	0.0751372	0.0695396	-0.0815165	0.178188	-0.146149	0.288591	-0.0426327	-0.066925	0.147859	-0.0228181	0.436949	0.200313	-0.0251388	-0.204115	0.346411	-0.045626	0.08718	0.026436	-0.0871504	-0.00640998
TCGA-KK-A6E5-01A	-0.157111	-0.0860557	0.237547	0.162811	0.309894	0.292284	0.474505	0.207658	0.0654743	0.0927869	-0.189113	0.170569	-0.109597	0.29773	-0.0218799	-0.0278695	0.139605	-0.0147538	0.405317	0.271143	-0.0204839	-0.25397	0.379397	-0.00850463	0.10567	0.0368727	-0.0756818	0.00333871
TCGA-KK-A6E6-01A	-0.259164	0.00791173	0.25483	0.172769	0.334374	0.266686	0.461073	0.234235	0.0761963	0.136394	-0.0252889	0.16945	-0.105175	0.330956	-0.0199811	0.0861591	0.181076	0.0137753	0.394859	0.319769	0.00183081	-0.207889	0.377027	0.0261811	0.115953	0.0702276	-0.100354	0.0348691
TCGA-KK-A6E7-01A	-0.29733	-0.04601	0.17483	0.132395	0.307044	0.334056	0.428586	0.193546	0.0942321	0.0318508	-0.154731	0.184032	-0.184811	0.276352	-0.0526238	-0.0551004	0.0858335	-0.0526277	0.380676	0.228175	-0.00383894	-0.31495	0.351588	-0.0417487	0.0819802	0.0154028	-0.0809584	0.0713078
TCGA-KK-A6E8-01A	-0.342235	-0.0587203	0.202559	0.0892854	0.292133	0.245891	0.440331	0.191981	0.0589645	0.0261273	-0.182046	0.2131	-0.168854	0.301596	-0.0576632	-0.0426724	0.056847	-0.120035	0.425725	0.178593	-0.0544185	-0.325319	0.372439	-0.0911712	0.0674625	-0.0051299	-0.104564	-0.00368013
TCGA-KK-A7AP-01A	-0.354557	-0.126395	0.17576	0.126729	0.308681	0.304815	0.424742	0.199891	0.0655791	0.0382826	-0.217065	0.15143	-0.181413	0.31859	-0.0553275	-0.127018	0.0244822	-0.099876	0.411292	0.215522	-0.0556263	-0.358896	0.361056	-0.100847	-0.0153202	-0.0232866	-0.133433	-0.0581369
TCGA-KK-A7AQ-01A	-0.268421	-0.111507	0.202588	0.158842	0.345249	0.32208	0.454579	0.215622	0.0190831	0.0628773	-0.165561	0.238952	-0.117944	0.274869	-0.0450573	-0.0857397	0.118547	-0.0384652	0.436932	0.259197	-0.00473292	-0.266304	0.366103	-0.0925904	0.079028	0.0210664	-0.0956961	-0.00657394
TCGA-KK-A7AU-01A	-0.375661	-0.147694	0.172104	0.141739	0.315718	0.271225	0.398065	0.163162	0.0626819	0.0207611	-0.189652	0.119427	-0.22571	0.307056	-0.0751766	-0.19002	-0.00877428	-0.0665933	0.409682	0.174287	-0.0726582	-0.266214	0.346184	-0.105147	0.0257893	-0.0426153	-0.149908	-0.0320191
TCGA-KK-A7AV-01A	-0.013714	0.087142	0.370309	0.225846	0.342554	0.321646	0.540689	0.22953	0.0778464	0.201344	-0.133923	0.206046	0.0525305	0.332157	0.0487281	0.0731414	0.327932	-0.0124422	0.43186	0.314723	0.0251325	-0.245524	0.393435	0.0522866	0.148255	0.102124	-0.0770326	0.0184164
TCGA-KK-A7AW-01A	-0.0840202	-0.0411496	0.365595	0.215573	0.312375	0.318131	0.417156	0.207479	0.0479475	0.13552	-0.0979182	0.221399	-0.0610984	0.287717	0.0692624	-0.0140492	0.319828	-0.0327156	0.456875	0.267202	-0.0115942	-0.184168	0.373058	0.0453454	0.113386	0.0556565	-0.088844	-0.0436318
TCGA-KK-A7AY-01A	-0.284548	-0.114744	0.24835	0.150267	0.358081	0.281801	0.413472	0.212343	0.0975075	0.0558333	-0.066262	0.169359	-0.1873	0.317567	-0.0376124	-0.0165393	0.125087	-0.0368242	0.415719	0.254025	-0.043431	-0.254078	0.39189	-0.0957512	0.0561961	0.0201796	-0.123676	-0.00878247
TCGA-KK-A7AZ-01A	-0.32394	-0.079896	0.214276	0.140757	0.294736	0.300683	0.452589	0.184601	0.063897	0.0476324	-0.103735	0.170778	-0.10721	0.288348	-0.0798376	-0.0654527	0.0874216	-0.0145558	0.41202	0.209453	-0.0566747	-0.287615	0.345583	-0.0764387	0.038334	-0.0176282	-0.101063	-0.0168571
TCGA-KK-A7B0-01A	-0.0283234	-0.019183	0.37682	0.236628	0.340906	0.347442	0.5099	0.260044	0.0787289	0.195094	-0.162098	0.22588	0.000117559	0.306497	0.0780597	0.040049	0.328896	0.0136813	0.434492	0.30353	0.0217716	-0.232448	0.375889	0.041556	0.135496	0.106984	-0.0682059	-0.016421
TCGA-KK-A7B1-01A	-0.315294	-0.0725191	0.16768	0.178762	0.306862	0.307211	0.482287	0.196486	0.0750379	0.129078	-0.0829809	0.153044	-0.165275	0.327601	-0.0274777	0.0248466	0.114087	0.00475797	0.429661	0.294657	0.012738	-0.196303	0.385983	-0.0117869	0.094636	0.043087	-0.0599218	0.058646
TCGA-KK-A7B2-01A	-0.132168	0.0369323	0.364511	0.233093	0.346454	0.358803	0.52658	0.240062	0.106434	0.215641	-0.0351835	0.195968	-0.0535736	0.354672	0.087129	0.0704337	0.355288	0.0325447	0.428703	0.31633	0.0521454	-0.200608	0.392891	0.0830247	0.176475	0.113999	-0.0520964	0.0258784
TCGA-KK-A7B3-01A	-0.246729	-0.0447957	0.299174	0.191821	0.323316	0.328824	0.51333	0.232852	0.11001	0.132848	-0.0581755	0.198241	-0.0669966	0.305976	0.0509018	0.0543708	0.255407	-0.0355818	0.417943	0.307419	0.0179703	-0.241567	0.393645	0.0580826	0.125136	0.0590688	-0.0976401	-0.0537535
TCGA-KK-A7B4-01A	-0.244109	0.0172106	0.270342	0.187428	0.32247	0.290441	0.457873	0.215376	0.0720836	0.130626	-0.157643	0.177512	-0.0866191	0.316116	-0.0301018	-0.0800025	0.173628	0.0319133	0.400626	0.256085	-0.0274069	-0.294948	0.357109	-0.00784742	0.0864127	0.0234752	-0.119455	0.0129169
TCGA-KK-A8I4-01A	-0.0861441	0.0895862	0.362524	0.246699	0.3449	0.324316	0.557416	0.250629	0.0868226	0.22564	-0.0553905	0.205714	0.0472352	0.349248	0.0610307	0.0676343	0.368123	0.0240435	0.390304	0.323311	0.0735034	-0.160827	0.410074	0.102919	0.185048	0.141335	-0.0828943	0.0614933
TCGA-KK-A8I5-01A	-0.289475	-0.0853906	0.17397	0.14666	0.315729	0.261139	0.468657	0.216137	0.073478	0.0858297	0.0419367	0.176551	-0.146704	0.335222	-0.0452533	0.0303954	0.0951726	-0.0282686	0.383096	0.295408	-0.0120824	-0.247442	0.374227	-0.0269298	0.106465	0.0625618	-0.080007	0.00612999
TCGA-KK-A8I6-01A	-0.25093	-0.0725185	0.201805	0.160316	0.323836	0.286989	0.458879	0.197033	0.0725867	0.0810727	-0.187307	0.163497	-0.155525	0.326376	-0.0509031	-0.0777606	0.0797089	-0.00635916	0.440496	0.263735	-0.0650783	-0.244635	0.369286	-0.0667492	0.0673805	0.00226164	-0.120462	0.00112101
TCGA-KK-A8I7-01A	-0.180476	-0.0600683	0.22671	0.2129	0.363653	0.309459	0.507961	0.23239	0.090728	0.140173	-0.129907	0.181844	-0.0755498	0.336761	0.0222728	0.0504805	0.244237	0.0264182	0.417587	0.309951	-0.00279629	-0.21854	0.42903	0.0570467	0.15468	0.0580854	-0.0566942	0.0347961
TCGA-KK-A8I8-01A	-0.24107	-0.0608705	0.239152	0.161285	0.303581	0.262705	0.448304	0.202175	0.0732909	0.0877931	-0.168468	0.167121	-0.104075	0.329481	-0.0229025	-0.108115	0.10367	-0.0156931	0.381805	0.223377	-0.03261	-0.270647	0.366123	-0.0385829	0.0633729	0.01072	-0.149822	-0.0314098
TCGA-KK-A8I9-01A	-0.2113	0.00311228	0.229372	0.237869	0.374439	0.326142	0.512944	0.264579	0.0829335	0.170472	-0.102657	0.200662	-0.115809	0.317363	0.0494136	0.104726	0.292583	0.0388781	0.434267	0.310576	0.0606648	-0.151987	0.420913	0.0140007	0.163853	0.100228	-0.0640717	0.0760104
TCGA-KK-A8IA-01A	-0.29962	-0.0536452	0.160512	0.117257	0.338941	0.26858	0.44323	0.200797	0.0938816	0.0703956	-0.159613	0.172338	-0.163801	0.310841	-0.0798463	-0.118209	0.0495629	-0.0451385	0.408446	0.227952	-0.0511269	-0.27927	0.351124	-0.055292	0.063199	-0.00667437	-0.136544	0.0213725
TCGA-KK-A8IB-01A	-0.130405	0.0727845	0.279727	0.208197	0.317406	0.311752	0.502697	0.27421	0.096927	0.145679	-0.028308	0.220234	-0.073194	0.318855	0.0421343	0.00516234	0.270095	0.0292451	0.414122	0.292533	0.0587967	-0.227179	0.394406	0.0294697	0.11586	0.110118	-0.0763563	0.0664382
TCGA-KK-A8IC-01A	-0.219952	0.00899947	0.183834	0.166085	0.339697	0.300053	0.517069	0.216658	0.0622724	0.143541	-0.0354667	0.146697	-0.0751403	0.364601	-0.0272682	0.0754601	0.174465	0.0407534	0.422934	0.341592	0.00807237	-0.226443	0.389346	0.0221805	0.118483	0.0867195	-0.0908987	0.0458369
TCGA-KK-A8ID-01A	-0.283477	0.0248388	0.195887	0.15981	0.304188	0.279199	0.442508	0.188288	0.0890728	0.0534094	-0.0541319	0.188261	-0.176652	0.305462	-0.0827419	-0.11014	0.0407503	-0.0470709	0.396503	0.223884	-0.0691015	-0.330612	0.35818	-0.0529195	0.0705053	0.00249309	-0.130361	0.0285204
TCGA-KK-A8IF-01A	-0.358398	-0.122126	0.171187	0.0995463	0.294405	0.217081	0.442983	0.19757	0.0236456	0.00528455	-0.174254	0.196839	-0.119645	0.25129	-0.139058	-0.120718	-0.00119957	-0.0590826	0.427094	0.207239	-0.044969	-0.260334	0.358556	-0.150885	0.02802	-0.00105525	-0.0875235	-0.0272485
TCGA-KK-A8IG-01A	-0.253234	-0.033166	0.217988	0.148251	0.340479	0.277987	0.496186	0.240786	0.0945007	0.111552	0.00665202	0.19296	-0.051938	0.328662	-0.0268385	0.0624504	0.187125	-0.0588089	0.399887	0.315703	0.0555515	-0.26235	0.380355	0.0119707	0.157875	0.0785495	-0.0827172	0.01166
TCGA-KK-A8IH-01A	-0.147387	-0.0255752	0.207478	0.197754	0.350191	0.244931	0.473401	0.20157	0.0458168	0.107414	-0.0306368	0.186786	-0.0632979	0.30865	-0.00679854	-0.0305636	0.14871	-0.0364789	0.381828	0.207706	-0.0410547	-0.248585	0.368301	-0.0974269	0.0749321	0.0357109	-0.087612	0.016334
TCGA-KK-A8II-01A	-0.364808	-0.0729585	0.154512	0.109899	0.287854	0.238787	0.413016	0.186614	0.04756	0.0530081	-0.0444577	0.130311	-0.196931	0.321781	-0.103206	-0.0493653	-0.00254981	-0.0318101	0.376084	0.188223	-0.0646261	-0.249458	0.328859	-0.0412844	0.0431741	-0.0245549	-0.114389	-0.0227153
TCGA-KK-A8IJ-01A	-0.299383	-0.0914704	0.145015	0.144694	0.307925	0.281295	0.46698	0.215341	0.0835084	0.0381588	-0.0348795	0.166986	-0.137486	0.316736	0.0141357	0.10134	0.10367	-0.0480057	0.418653	0.249646	-0.000886508	-0.218402	0.373642	-0.0341764	0.131163	0.0302986	-0.0759008	0.0447115
TCGA-KK-A8IK-01A	-0.336007	-0.0323958	0.140242	0.114351	0.301824	0.271715	0.453874	0.208248	0.0780217	-0.00159022	-0.211453	0.227686	-0.102338	0.283241	-0.0501835	-0.0385708	0.0167623	-0.00801511	0.405985	0.201439	-0.0144722	-0.298988	0.360432	-0.0797155	0.0466011	-0.0257535	-0.0518784	-0.0171959
TCGA-KK-A8IL-01A	-0.198061	0.032688	0.318625	0.235378	0.347232	0.32069	0.538977	0.26078	0.0609643	0.201979	-0.0477595	0.195872	-0.0607325	0.340682	0.0346125	0.0494979	0.32904	0.00715536	0.407089	0.303789	0.0649888	-0.182824	0.388507	0.0634872	0.146445	0.0966482	-0.0599554	0.0564074
TCGA-KK-A8IM-01A	-0.244673	-0.0641704	0.238039	0.210486	0.343055	0.290328	0.493608	0.22478	0.0932223	0.113427	-0.0984703	0.171331	-0.0933575	0.350563	-0.0368566	-0.0354894	0.174238	0.0089139	0.405281	0.285581	-0.0301341	-0.258377	0.3911	-0.0013744	0.10333	0.0478288	-0.114952	0.0295454
TCGA-M7-A71Y-01A	-0.30039	-0.110802	0.200314	0.164247	0.32521	0.29762	0.491617	0.219873	0.0659989	0.0928774	-0.130263	0.160212	-0.112657	0.343801	-0.0275701	-0.0135538	0.0990588	-0.00803962	0.411103	0.295927	-0.019128	-0.287026	0.375379	-0.0323492	0.0912342	0.0139623	-0.0961524	-0.0279761
TCGA-M7-A71Z-01A	-0.37814	-0.157115	0.117533	0.0833812	0.291506	0.260705	0.379493	0.178289	0.0454554	0.000686902	-0.120049	0.156077	-0.238699	0.301214	-0.0650067	-0.158525	-0.00591076	-0.0209737	0.401213	0.136873	-0.100183	-0.2293	0.332798	-0.108878	0.0468677	-0.0151637	-0.151522	-0.0815366
TCGA-M7-A720-01A	-0.174637	-0.0879465	0.186387	0.164484	0.32336	0.291263	0.486961	0.213782	0.0785189	0.102167	-0.109847	0.153457	-0.114962	0.359058	-0.0343554	0.0245894	0.114408	-0.00334645	0.404978	0.318304	-0.0376822	-0.288888	0.371541	-0.0491415	0.0671529	0.018451	-0.0853045	0.00607259
TCGA-M7-A721-01A	-0.222649	-0.0769411	0.196969	0.20354	0.319175	0.322706	0.487999	0.200984	0.0591132	0.0880875	-0.173205	0.207073	-0.115039	0.323459	-0.0446458	-0.000276732	0.119719	-0.0105222	0.434506	0.271252	-0.0277853	-0.272955	0.38063	-0.0172833	0.0978341	0.0452385	-0.114068	0.00283128
TCGA-M7-A722-01A	-0.295323	-0.0322909	0.187125	0.185383	0.264105	0.223304	0.374993	0.242617	0.0572261	0.0598119	-0.137973	0.186779	-0.0739441	0.301963	0.0159742	-0.0738166	0.151877	-0.0136526	0.400133	0.20051	-0.0559442	-0.348448	0.347031	-0.044409	0.0677648	-0.0104156	-0.124414	0.00798765
TCGA-M7-A723-01A	-0.165707	-0.0296557	0.354027	0.216535	0.355666	0.303747	0.51382	0.231985	0.0621751	0.170974	-0.159413	0.210974	-0.03248	0.341789	0.0624732	-0.00154348	0.288123	-0.00614954	0.422455	0.325876	0.0522439	-0.227949	0.39049	0.0507596	0.151642	0.0953498	-0.0810234	0.00406723
TCGA-M7-A724-01A	-0.353344	-0.0146913	0.156034	0.0996937	0.301476	0.292303	0.390865	0.18663	0.0698129	-0.0162657	-0.140215	0.188367	-0.245746	0.271103	-0.0515647	-0.0596714	0.0239622	-0.0326815	0.397256	0.134008	-0.0579731	-0.233808	0.331918	-0.0605039	0.0634496	-0.0670083	-0.101782	0.00757829
TCGA-M7-A725-01A	-0.341385	-0.00720181	0.150819	0.1556	0.31226	0.253143	0.445975	0.205329	0.0836868	0.0397454	-0.0618327	0.18198	-0.12786	0.320633	-0.0476076	-0.0545693	0.0833289	-0.0465459	0.390153	0.234074	-0.0382558	-0.21316	0.341452	-0.0266056	0.0733719	-0.00736932	-0.109684	0.0400582
TCGA-MG-AAMC-01A	-0.298564	-0.0845275	0.209603	0.123971	0.337801	0.25022	0.436445	0.172936	0.100974	0.0327632	-0.0459845	0.162995	-0.197216	0.299122	-0.0613998	-0.0549447	0.0166004	-0.101056	0.427328	0.206893	-0.0311173	-0.243935	0.339153	-0.0558991	0.0631504	0.0103452	-0.0999706	-0.0126966
TCGA-QU-A6IL-01A	-0.225396	-0.043878	0.272849	0.121424	0.322534	0.332429	0.406708	0.198532	0.0575819	0.0706815	-0.0602699	0.209708	-0.152274	0.272361	0.013154	0.00970893	0.158138	-0.0708584	0.441285	0.225281	0.00426901	-0.241566	0.38056	-0.0107402	0.0808752	0.0346292	-0.036032	-0.00154496
TCGA-QU-A6IM-01A	-0.220572	-0.0366829	0.400758	0.187079	0.316871	0.352569	0.439917	0.205713	0.0269066	0.153773	-0.0432252	0.197668	-0.144283	0.286011	0.00807248	0.0332738	0.253796	-0.036153	0.431024	0.268551	-0.000632123	-0.179788	0.36822	-0.0414744	0.100629	0.0862288	-0.0538072	-0.0235861
TCGA-QU-A6IN-01A	-0.297259	-0.116737	0.204169	0.0864917	0.303801	0.260352	0.400495	0.173099	0.041804	0.025527	-0.0399288	0.168246	-0.19551	0.278212	-0.0592274	-0.0703546	0.0476245	-0.0603692	0.408955	0.160794	-0.0690116	-0.265136	0.36879	-0.10496	0.0138282	-0.00386808	-0.0455742	-0.0848121
TCGA-QU-A6IO-01A	-0.161956	-0.0414219	0.311006	0.186888	0.318273	0.344334	0.427673	0.191654	0.0187864	0.115601	-0.0645497	0.182997	-0.112666	0.280508	0.0307337	0.0118425	0.250353	-0.0500767	0.427197	0.244724	0.0077293	-0.217094	0.362412	-0.00143606	0.0974081	0.0402812	-0.0657619	-0.02123
TCGA-QU-A6IP-01A	-0.227597	-0.0917759	0.194708	0.146969	0.319927	0.301585	0.468189	0.18865	0.0401978	0.0845576	-0.111519	0.156255	-0.169559	0.329337	-0.0371511	-0.0157665	0.106933	-0.0474793	0.406408	0.279036	-0.0305874	-0.247504	0.38368	-0.0639225	0.0667239	0.0367497	-0.0685843	-0.00848354
TCGA-SU-A7E7-01A	-0.170499	0.0478885	0.245627	0.213361	0.340092	0.311283	0.490079	0.229556	0.0824284	0.123654	0.0312677	0.166383	-0.0782349	0.315753	-0.00429673	0.106307	0.213164	-0.0270555	0.39728	0.314139	-0.00885485	-0.240334	0.396389	0.0136324	0.113221	0.0686905	-0.0851376	0.0348212
TCGA-TK-A8OK-01A	-0.286362	-0.087406	0.109417	0.146841	0.353427	0.291419	0.516182	0.268019	0.096183	0.160099	-0.0474352	0.178903	-0.0532433	0.371528	0.00107082	0.181056	0.192006	-0.00827271	0.380744	0.366972	0.0842873	-0.269835	0.419813	0.0656861	0.16857	0.103674	-0.0595313	0.074687
TCGA-TP-A8TT-01A	-0.179731	0.0376572	0.338196	0.255223	0.359732	0.286741	0.507824	0.247041	0.12233	0.213576	-0.0523127	0.184967	-0.00274166	0.364275	0.0142105	0.105575	0.27396	0.012182	0.411759	0.344107	0.0321376	-0.205979	0.381501	0.0758637	0.139616	0.103455	-0.0981887	0.0328241
TCGA-TP-A8TV-01A	-0.345644	-0.0983865	0.145497	0.10193	0.301753	0.258462	0.4428	0.185751	0.0486227	0.0192385	-0.111025	0.159614	-0.212199	0.270159	-0.0892248	-0.0527785	0.0610387	-0.0398563	0.419645	0.202021	-0.0707955	-0.2436	0.340712	-0.106791	0.0360569	0.00275031	-0.112435	0.0196461
TCGA-V1-A8MF-01A	-0.208066	0.0408722	0.302235	0.191523	0.337886	0.36994	0.51014	0.236841	0.0842248	0.140342	-0.0436597	0.212971	-0.053437	0.3507	0.0176044	0.119381	0.246747	-0.000362621	0.410216	0.290463	0.0243586	-0.262452	0.38171	0.0338522	0.138932	0.0562695	-0.0703623	0.00184265
TCGA-V1-A8MG-01A	-0.235432	-0.0556856	0.265077	0.181482	0.323678	0.268811	0.487522	0.218607	0.0526789	0.115503	-0.171667	0.151559	-0.125787	0.288605	-0.0495298	-0.0468441	0.163542	-0.00868134	0.399959	0.284321	-0.0324436	-0.268149	0.372282	-0.0364985	0.0789784	0.036231	-0.113826	0.0282358
TCGA-V1-A8MK-01A	-0.21405	-0.064839	0.197026	0.162124	0.332974	0.285404	0.491566	0.185112	0.0573	0.100646	-0.116801	0.164755	-0.129168	0.343007	-0.0443376	-0.0130115	0.0892212	-0.0360943	0.416537	0.301149	-0.0136169	-0.285071	0.384933	-0.0692182	0.101699	0.0472655	-0.0942819	0.0193675
TCGA-V1-A8ML-01A	-0.254059	-0.0866668	0.198145	0.15578	0.312333	0.264315	0.468092	0.206973	0.0693763	0.0421606	-0.0970499	0.199375	-0.0960362	0.336434	-0.0578443	-0.0240098	0.0693249	-0.0459874	0.419163	0.277485	-0.0285942	-0.271682	0.341149	-0.0454501	0.0899077	0.0298076	-0.0831455	0.00659027
TCGA-V1-A8MM-01A	-0.221188	-0.00472932	0.280084	0.17685	0.31154	0.273572	0.486388	0.219439	0.0604123	0.150375	-0.189955	0.211033	-0.0751108	0.321194	0.0204911	-0.0310358	0.217916	-0.0595564	0.426264	0.27489	0.00178137	-0.32259	0.398831	-0.00619242	0.12946	0.0614428	-0.0999923	-0.0182225
TCGA-V1-A8MU-01A	-0.163422	-0.0167086	0.309926	0.206441	0.346475	0.319681	0.51943	0.220848	0.0858486	0.153953	-0.151013	0.180298	-0.0674067	0.317994	0.0141898	0.0461796	0.257991	-0.0180749	0.425221	0.331433	0.0320977	-0.214786	0.41415	0.016524	0.127591	0.0731998	-0.0820556	0.0535503
TCGA-V1-A8WL-01A	-0.081694	0.0673952	0.320326	0.197336	0.343079	0.27709	0.522202	0.227491	0.075039	0.126507	0.00383826	0.176295	0.00906186	0.298832	-0.0320332	0.0865939	0.198854	-0.045041	0.388493	0.288045	-0.00553492	-0.317659	0.380733	-0.0301569	0.104598	0.0959936	-0.107305	0.0202992
TCGA-V1-A8WN-01A	-0.264305	-0.055068	0.192105	0.155711	0.305459	0.273814	0.492208	0.201051	0.0720215	0.106235	0.0391504	0.15783	-0.147215	0.355557	-0.0580485	0.0445485	0.0706992	-0.000770621	0.410808	0.31655	-0.0122808	-0.237504	0.361018	-0.0437119	0.107972	0.054873	-0.0953669	0.0402777
TCGA-V1-A8WS-01A	-0.276643	-0.112549	0.167594	0.114724	0.305243	0.247956	0.437702	0.186184	0.0728121	0.040197	-0.115877	0.148108	-0.18508	0.335137	-0.123086	-0.0993424	0.00184446	0.000315289	0.374521	0.217163	-0.0534391	-0.250874	0.354107	-0.0758153	0.0600841	0.0122144	-0.141654	-0.0542443
TCGA-V1-A8WV-01A	-0.17665	0.0714701	0.28424	0.199171	0.323198	0.279825	0.50618	0.261837	0.0994105	0.134604	-0.186538	0.219443	-0.0375577	0.295075	-0.0151517	-0.0346718	0.226412	0.0302151	0.410776	0.293848	0.00440845	-0.304647	0.388181	-0.0380757	0.0852367	0.0537871	-0.0276544	0.0874897
TCGA-V1-A8WW-01A	-0.246418	-0.0365257	0.243816	0.155201	0.309096	0.281674	0.485974	0.220601	0.0658607	0.0852004	-0.161121	0.1987	-0.0482347	0.297597	-0.0595492	-0.10092	0.151088	-0.0147972	0.40679	0.277083	-0.022697	-0.191562	0.338078	0.0184174	0.0656909	0.0506719	-0.0994239	0.0173758
TCGA-V1-A8X3-01A	-0.223101	-0.0676995	0.204222	0.159901	0.297256	0.284169	0.455642	0.220571	0.0892231	0.0669426	-0.0811926	0.163443	-0.0988008	0.297366	-0.0344238	0.0359086	0.124238	-0.024275	0.407672	0.281087	-0.0305324	-0.273658	0.372589	-0.0128454	0.103408	0.0387034	-0.0854963	0.0282023
TCGA-V1-A9O5-01A	-0.215865	0.118576	0.333088	0.24082	0.307774	0.272716	0.517233	0.291122	0.0826386	0.160215	-0.131519	0.238124	-0.00955088	0.320536	0.00640667	0.0201224	0.290339	0.000235897	0.423957	0.305842	0.00865431	-0.317678	0.345895	0.018174	0.133536	0.0650822	-0.107816	0.0862277
TCGA-V1-A9O7-01A	-0.219231	0.0401804	0.228335	0.203924	0.356409	0.337608	0.513358	0.262241	0.134707	0.123615	0.0277194	0.191327	-0.0707367	0.345453	0.0194856	0.134247	0.221168	0.000334754	0.373444	0.347845	0.0518767	-0.253531	0.402132	0.0735285	0.146486	0.102844	-0.0846589	0.0690598
TCGA-V1-A9O9-01A	0.0294393	0.143839	0.399532	0.281131	0.333735	0.269668	0.534292	0.224746	0.0812508	0.211406	-0.0857484	0.186118	0.111256	0.326507	0.0131652	-0.0183342	0.300802	0.00694875	0.425043	0.313181	-0.00129069	-0.229723	0.366813	0.0718655	0.134744	0.104723	-0.0932649	0.0346673
TCGA-V1-A9OA-01A	-0.269633	-0.0674334	0.193715	0.199449	0.345239	0.265807	0.491055	0.256988	0.0890049	0.150586	-0.0824023	0.163166	-0.127957	0.363349	-0.005037	-0.0234233	0.161096	0.0367347	0.370232	0.332114	0.0381182	-0.275122	0.402178	0.00707409	0.108096	0.0226281	-0.073108	0.0246583
TCGA-V1-A9OF-01A	-0.291947	-0.0935463	0.185111	0.154447	0.331624	0.259043	0.448246	0.198137	0.0451925	0.0450741	-0.189805	0.186924	-0.148585	0.317685	-0.0321106	-0.0212493	0.0791867	-0.0131713	0.412435	0.214797	-0.0513558	-0.224054	0.335144	-0.0624696	0.0528131	-0.0179894	-0.1194	-0.00353983
TCGA-V1-A9OH-01A	-0.237527	-0.0549427	0.208839	0.201019	0.328578	0.300017	0.483075	0.222613	0.0796372	0.0910069	-0.141408	0.186717	-0.119976	0.318335	-0.0156446	-0.0636712	0.108693	0.0186702	0.413206	0.274642	-0.0109593	-0.263797	0.37452	-0.0253016	0.0875433	0.0493465	-0.0915386	0.0264477
TCGA-V1-A9OL-01A	-0.249339	0.0378959	0.254902	0.200668	0.312921	0.288735	0.463352	0.230776	0.0789084	0.0806723	-0.17701	0.189308	-0.0884836	0.291536	-0.0532808	-0.0653894	0.176883	-0.020714	0.372292	0.261008	-0.0222893	-0.304733	0.351773	-0.0201368	0.0832863	0.0261755	-0.140843	-0.000101291
TCGA-V1-A9OQ-01A	-0.143264	-0.032365	0.295366	0.123798	0.343261	0.295673	0.476584	0.191382	0.0843949	0.0978635	-0.0968572	0.183759	-0.074217	0.31395	-0.034612	-0.00832142	0.13045	-0.0550272	0.433838	0.284991	-0.00223337	-0.249921	0.372476	-0.065062	0.111865	0.0626708	-0.0981889	0.00538566
TCGA-V1-A9OT-01A	-0.211863	-0.0972841	0.256643	0.142925	0.334099	0.319823	0.464133	0.160228	0.051089	0.0979841	-0.164488	0.142108	-0.169191	0.301674	-0.0269686	-0.0331701	0.108884	0.0120026	0.414363	0.28436	-0.0366196	-0.253298	0.375988	-0.14771	0.079645	0.0169873	-0.0775348	-0.0492634
TCGA-V1-A9OX-01A	-0.211348	-0.0267829	0.263973	0.189421	0.341659	0.324108	0.495772	0.214417	0.0710474	0.0925178	-0.117139	0.206814	-0.0914851	0.32743	-0.0107566	0.0180044	0.184631	-0.0496257	0.425633	0.28624	-0.00559961	-0.274789	0.369923	-0.0436415	0.0883084	0.0454085	-0.0765614	0.01875
TCGA-V1-A9OY-01A	-0.199502	-0.0314132	0.270955	0.192735	0.328507	0.298004	0.494715	0.205503	0.0781031	0.117813	-0.176208	0.166923	-0.102652	0.331542	-0.026759	-0.0410685	0.136697	0.00424801	0.424236	0.287157	-0.00988194	-0.227977	0.374714	-0.036665	0.101855	0.0674374	-0.105178	-0.00455929
TCGA-V1-A9Z7-01A	-0.231209	-0.0132977	0.240289	0.171597	0.342821	0.261836	0.492906	0.268158	0.114222	0.131979	-0.119257	0.241686	-0.0597444	0.337438	0.0279938	0.0570086	0.177637	-0.00259719	0.415108	0.300402	0.0202956	-0.268863	0.373418	0.0576587	0.124606	0.0854407	-0.112245	0.0608801
TCGA-V1-A9Z8-01A	-0.192169	-0.0544569	0.237877	0.206286	0.362595	0.280222	0.509918	0.251864	0.0936834	0.1209	-0.19497	0.196429	-0.0967825	0.353071	0.0168789	0.0337903	0.192989	-0.00501384	0.39537	0.322835	0.0262568	-0.245826	0.397416	-0.00227297	0.123395	0.0848951	-0.103162	0.0504562
TCGA-V1-A9Z9-01A	-0.299871	-0.0896538	0.1849	0.169781	0.322549	0.299964	0.478858	0.226993	0.0562824	0.0966206	-0.201478	0.183641	-0.138207	0.320207	-0.0334493	-0.0728084	0.13045	-0.0404024	0.398549	0.277361	-0.00448131	-0.250563	0.379789	-0.0292769	0.101902	0.0254411	-0.0923497	0.0342941
TCGA-V1-A9ZG-01A	-0.317362	-0.0423445	0.154651	0.18474	0.338918	0.300567	0.482114	0.253923	0.105607	0.11734	-0.0370265	0.136572	-0.146895	0.358094	-0.0431146	0.0412188	0.154358	-0.0210408	0.400004	0.290977	0.00832006	-0.244285	0.383685	0.0223112	0.126446	0.0688834	-0.143619	0.0108427
TCGA-V1-A9ZI-01A	-0.281976	-0.0679745	0.23309	0.192481	0.323604	0.289631	0.484053	0.246483	0.0829657	0.1433	-0.221436	0.242472	-0.0962511	0.309795	0.047928	-0.0363495	0.236036	-0.0364216	0.395186	0.260494	0.0303795	-0.249764	0.373235	0.0295249	0.0898965	0.049436	-0.104242	0.013722
TCGA-V1-A9ZK-01A	-0.281395	-0.0896704	0.183699	0.175882	0.322014	0.274537	0.475555	0.203371	0.0553989	0.0812424	-0.206634	0.161806	-0.110591	0.317977	-0.0365749	-0.00969507	0.125523	-0.0073558	0.424478	0.296641	-0.0312904	-0.258063	0.356881	-0.0538778	0.085287	0.0278752	-0.108732	-0.00232092
TCGA-V1-A9ZR-01A	-0.154429	-0.0910803	0.256311	0.213275	0.343409	0.310135	0.528659	0.248363	0.102019	0.186948	-0.0936741	0.201966	-0.0306044	0.352131	0.0627389	0.0443956	0.317334	0.0432937	0.40733	0.330176	0.0475056	-0.282747	0.418758	0.0979058	0.141435	0.1024	-0.122044	0.0140918
TCGA-VN-A88I-01A	-0.172016	-0.0578522	0.251302	0.192928	0.363701	0.331169	0.528386	0.245991	0.112134	0.175452	-0.0851985	0.151567	-0.0659967	0.359695	0.0218841	0.0746587	0.250064	0.00789764	0.377644	0.362678	0.0574754	-0.296227	0.440423	0.029787	0.159358	0.136153	-0.0782094	0.0551103
TCGA-VN-A88K-01A	-0.365864	-0.072812	0.20364	0.127395	0.292083	0.292825	0.44792	0.188544	0.0603854	0.0722267	-0.103993	0.158693	-0.171144	0.343112	-0.0395654	0.0448543	0.133891	-0.028214	0.37543	0.264577	-0.0213239	-0.218024	0.358958	-0.0533547	0.0955593	0.0226726	-0.0945688	-0.0074334
TCGA-VN-A88L-01A	-0.320026	-0.109723	0.138829	0.122986	0.316219	0.281473	0.46194	0.184247	0.0796977	0.083233	-0.0245466	0.157885	-0.157384	0.314674	-0.0430333	0.0947376	0.0389289	-0.0132883	0.412096	0.281927	0.000549542	-0.26327	0.375176	-0.0470981	0.0937463	0.0622804	-0.111165	0.0154063
TCGA-VN-A88M-01A	-0.249054	-0.068524	0.221861	0.100285	0.309694	0.290691	0.435464	0.166735	0.0823146	0.0770885	-0.0400523	0.168008	-0.172828	0.298934	-0.0615981	-0.0209119	0.0278379	-0.0555216	0.434716	0.214932	-0.0543648	-0.240833	0.36674	-0.0942449	0.0502629	0.0207835	-0.116407	-0.0188107
TCGA-VN-A88N-01A	-0.315235	-0.065781	0.210615	0.156655	0.357267	0.289228	0.451639	0.167598	0.112273	0.0447866	-0.0703636	0.16663	-0.190261	0.304341	-0.0628359	-0.00362074	0.055185	-0.0550282	0.427417	0.220824	-0.0509808	-0.220294	0.375661	-0.108507	0.0803302	-0.00312642	-0.100866	0.0141026
TCGA-VN-A88O-01A	-0.232352	-0.0113178	0.228483	0.167294	0.330661	0.291625	0.45037	0.208084	0.0859273	0.0975156	-0.0592316	0.200472	-0.0844374	0.30668	-0.0355339	-0.0071728	0.139763	-0.0651114	0.4474	0.252179	-0.0201276	-0.212115	0.320539	-0.0720381	0.0862859	0.0498097	-0.100013	0.016079
TCGA-VN-A88P-01A	-0.237867	-0.0434692	0.223673	0.170044	0.326421	0.283046	0.485135	0.226748	0.117448	0.0911562	-0.0946851	0.165588	-0.048948	0.3022	-0.0357083	0.0501097	0.154126	-0.0509141	0.375008	0.293299	-0.008492	-0.248282	0.347363	-0.0312358	0.112887	0.05363	-0.0527816	-0.0336022
TCGA-VN-A88Q-01A	-0.330226	-0.0742106	0.133931	0.162392	0.320019	0.282727	0.452129	0.199913	0.0745165	0.0732806	-0.0482966	0.170078	-0.174171	0.305519	-0.0367852	-0.0109976	0.0881157	-0.0366865	0.423587	0.217618	-0.0382091	-0.2147	0.335517	-0.043473	0.0556317	0.0275367	-0.12302	0.0320466
TCGA-VN-A88R-01A	-0.313849	-0.104378	0.16338	0.173236	0.349045	0.288869	0.439695	0.190294	0.0974057	0.0718902	-0.14336	0.175409	-0.122208	0.284157	-0.015124	0.00709949	0.149596	-0.0760509	0.417412	0.253401	-0.0403705	-0.209622	0.372876	-0.000999102	0.111812	-0.0102743	-0.0411603	0.00465463
TCGA-VN-A943-01A	-0.325304	-0.100911	0.161378	0.0572907	0.298112	0.262725	0.404017	0.156084	0.0413342	-0.0216139	-0.0760778	0.14068	-0.234525	0.322395	-0.133863	-0.103817	-0.0674274	-0.0466144	0.404825	0.151964	-0.0800895	-0.248088	0.301264	-0.174169	0.0335331	-0.0323613	-0.115587	-0.00600087
TCGA-VP-A872-01A	-0.0839747	-0.00536157	0.235633	0.223041	0.344343	0.277089	0.511273	0.227038	0.0677509	0.115753	-0.0481876	0.171738	-0.0600437	0.333376	0.0225536	-0.0429941	0.241998	0.0149845	0.431249	0.303552	0.0151487	-0.226996	0.364912	-0.0571943	0.124218	0.0854645	-0.0729126	0.00317246
TCGA-VP-A875-01A	-0.331672	-0.141705	0.149652	0.061892	0.278759	0.239815	0.404679	0.175376	0.0535545	0.0533599	-0.14187	0.152661	-0.193159	0.303498	-0.0921199	-0.182521	-0.0211706	-0.0172063	0.424523	0.175377	-0.0889584	-0.249986	0.322937	-0.116155	0.0382097	-0.0366516	-0.121255	-0.0257353
TCGA-VP-A876-01A	-0.336225	-0.0124817	0.201717	0.117862	0.307707	0.188815	0.428732	0.182423	0.0943804	0.0243486	-0.0813412	0.141059	-0.182656	0.296547	-0.0782509	-0.0505481	0.0043883	0.0120703	0.425593	0.195873	-0.0613685	-0.26185	0.320894	-0.0676855	0.037144	0.00474469	-0.124038	0.0163107
TCGA-VP-A878-01A	-0.225326	-0.0500777	0.197493	0.208232	0.34715	0.319706	0.509838	0.222152	0.0763751	0.122653	-0.143426	0.18272	-0.117773	0.321563	-0.0033899	0.108691	0.189219	0.0190273	0.435378	0.310603	0.0507768	-0.222021	0.393768	0.0162406	0.14442	0.0650367	-0.073568	0.0702119
TCGA-VP-A879-01A	-0.23323	-0.183097	0.117513	0.142773	0.329103	0.289074	0.465944	0.185925	0.0791898	0.0786818	-0.108315	0.145038	-0.190387	0.362837	-0.0679246	-0.0206754	0.0387025	0.000884059	0.41319	0.303744	-0.0524963	-0.240311	0.386617	-0.0592689	0.0695704	0.0228014	-0.0896188	0.00366682
TCGA-VP-A87B-01A	-0.315212	-0.0818341	0.161768	0.153049	0.307879	0.295166	0.463319	0.221457	0.0632929	0.0485079	-0.157488	0.197697	-0.0807378	0.251851	-0.0206829	-0.0569243	0.126064	0.0180086	0.4141	0.240448	-0.0302137	-0.226296	0.360174	-0.0250988	0.0774654	0.0221554	-0.116734	-0.0331704
TCGA-VP-A87C-01A	0.163557	0.209136	0.48669	0.289156	0.34541	0.27537	0.571453	0.26171	0.129539	0.281046	0.010007	0.193275	0.194825	0.352142	0.054167	0.093941	0.416204	0.0886241	0.451203	0.395705	0.0644271	-0.285118	0.416848	0.178604	0.200871	0.18536	-0.0588535	0.0655554
TCGA-VP-A87D-01A	-0.324066	-0.125228	0.148042	0.140823	0.311898	0.283924	0.421536	0.171261	0.102097	0.0711032	-0.213572	0.133512	-0.163097	0.306986	-0.0704987	-0.156337	0.0262744	-0.0111105	0.388178	0.233986	-0.0658351	-0.290773	0.36529	-0.0992083	0.0225229	-0.023801	-0.126505	-0.0101876
TCGA-VP-A87E-01A	-0.137057	0.0796398	0.334802	0.19926	0.333914	0.321463	0.53195	0.27404	0.129331	0.188666	0.0432087	0.190139	-0.000911983	0.325646	0.00696313	0.0938147	0.337684	-0.0479318	0.404456	0.366912	0.0453003	-0.177148	0.396593	0.0949364	0.178354	0.17512	-0.0289409	0.0630722
TCGA-VP-A87H-01A	-0.287743	0.0389452	0.174682	0.172741	0.29342	0.280268	0.460224	0.243405	0.0562672	0.0783275	-0.0616078	0.157001	-0.0878579	0.284184	-0.073389	-0.0310571	0.128172	0.00324772	0.404205	0.266251	-0.0556102	-0.255261	0.338511	-0.0954253	0.0650354	0.00845553	-0.0761909	0.0514905
TCGA-VP-A87J-01A	-0.328359	-0.0454477	0.161376	0.13945	0.298684	0.273097	0.4422	0.21765	0.0730195	0.0425015	0.0377023	0.171736	-0.119108	0.295173	-0.094434	0.031201	0.0743026	-0.0393096	0.423997	0.247655	-0.0435388	-0.238325	0.350469	-0.00127604	0.0740691	0.0158716	-0.0608077	0.0366036
TCGA-VP-A87K-01A	-0.285954	-0.105295	0.200426	0.12567	0.307556	0.276429	0.438472	0.166482	0.0714559	0.120842	-0.128978	0.128216	-0.148353	0.276675	-0.0767085	-0.145339	0.0513859	-0.0268906	0.399774	0.215668	-0.0666905	-0.263161	0.339798	-0.0558674	0.045903	-0.0204236	-0.13973	-0.0395933
TCGA-VP-AA1N-01A	-0.290811	0.0187052	0.285084	0.20133	0.318086	0.302529	0.494074	0.255129	0.0646916	0.155536	-0.054052	0.243787	-0.0885328	0.337964	-0.0078367	0.0265974	0.254228	-0.0324772	0.409026	0.271071	0.0476285	-0.235538	0.366439	0.0736544	0.135656	0.10688	-0.0490781	0.0429776
TCGA-WW-A8ZI-01A	-0.270954	-0.052942	0.218613	0.162933	0.295524	0.297995	0.448765	0.245707	0.0841299	0.088132	-0.191087	0.13786	-0.16144	0.316098	-0.0467432	-0.0436464	0.113715	-0.0424037	0.373346	0.215561	-0.0351785	-0.243734	0.315226	-0.0802431	0.0336089	5.70574e-05	-0.161808	-0.049935
TCGA-X4-A8KQ-01A	-0.242881	-0.0219095	0.192827	0.167751	0.349991	0.289827	0.496871	0.236534	0.0860008	0.128726	-0.00539288	0.179473	-0.144535	0.327665	0.0224933	0.00236869	0.203851	-0.00710664	0.42255	0.291139	0.0483825	-0.205472	0.39319	0.0013322	0.150034	0.0824851	-0.0494596	0.00760026
TCGA-X4-A8KS-01A	-0.187328	-0.0420922	0.271812	0.148633	0.366905	0.292167	0.482153	0.212994	0.0539512	0.0623008	-0.0781988	0.206227	-0.130694	0.331789	-0.0237915	0.0694317	0.131221	-0.0427381	0.425623	0.277574	0.000862896	-0.26805	0.398733	-0.0630068	0.0753467	0.0394927	-0.0526253	0.0268495
TCGA-XA-A8JR-01A	-0.194291	-0.0409779	0.188205	0.181097	0.34667	0.280949	0.475839	0.244784	0.0721074	0.0919562	-0.0605594	0.226896	-0.0863352	0.32286	-0.0338564	0.0855924	0.103022	-0.0658345	0.367571	0.275691	-0.0189084	-0.2668	0.378308	-0.0357515	0.0987175	0.0595933	-0.0939717	-0.00261994
TCGA-XJ-A83F-01A	-0.292295	-0.112682	0.149466	0.133206	0.301542	0.283898	0.432539	0.196206	0.074774	0.0764629	-0.190475	0.171356	-0.174549	0.321725	-0.00826843	-0.022185	0.0517325	-0.0302268	0.406892	0.238924	-0.0320987	-0.233832	0.378061	-0.0466117	0.062297	0.030038	-0.102552	-0.0328532
TCGA-XJ-A83G-01A	-0.300939	-0.0711786	0.210679	0.154494	0.319776	0.29877	0.441712	0.196295	0.0515812	0.0547405	-0.14105	0.172382	-0.167633	0.294033	-0.0603203	-0.0182335	0.0774528	-0.0496138	0.421194	0.207142	-0.0489432	-0.240154	0.369618	-0.0869993	0.0531014	0.00175624	-0.104557	-0.00902477
TCGA-XJ-A83H-01A	-0.266075	0.0175989	0.194466	0.155591	0.326045	0.311675	0.460504	0.226109	0.0549265	0.0650298	0.0108793	0.183895	-0.12069	0.32137	-0.0550933	0.0295597	0.139527	-0.0333427	0.410909	0.270338	-0.00735818	-0.196651	0.364935	-0.0724578	0.104783	0.0449175	-0.0716745	0.0355341
TCGA-XJ-A9DI-01A	-0.20881	0.0207864	0.340787	0.204781	0.350288	0.325388	0.54892	0.247143	0.0996456	0.217958	-0.101467	0.186486	-0.0515796	0.339106	0.037108	0.00975029	0.299108	0.0506005	0.402153	0.370915	0.0522984	-0.268006	0.413869	0.0792825	0.130148	0.0980128	-0.0659093	0.0548906
TCGA-XJ-A9DK-01A	-0.22715	-0.0537024	0.206413	0.170538	0.336456	0.304079	0.493926	0.222554	0.0847754	0.103712	-0.104412	0.154729	-0.11556	0.349623	-0.0411638	-0.0401744	0.0960149	-0.00186454	0.40214	0.294795	-0.0161333	-0.290502	0.394861	-0.0237536	0.083235	0.0219904	-0.0965292	-0.0118842
TCGA-XJ-A9DQ-01A	-0.257909	-0.114918	0.184198	0.150362	0.341787	0.300662	0.473978	0.164383	0.0494203	0.101211	-0.174981	0.163097	-0.203303	0.332185	-0.044245	-0.0188922	0.0160245	-0.0273394	0.402608	0.264361	-0.0385375	-0.255312	0.389622	-0.103292	0.0681119	0.010725	-0.0928622	-0.00251143
TCGA-XJ-A9DX-01A	-0.333001	-0.0953657	0.165345	0.159689	0.313052	0.321522	0.414668	0.197856	0.0649748	0.0813345	-0.27453	0.129589	-0.14615	0.267287	-0.0322771	-0.102938	0.0911608	-0.0620736	0.420293	0.254597	-0.0359992	-0.27138	0.397313	-0.0850897	0.0671411	-0.000409371	-0.125909	-0.0660892
TCGA-XK-AAIR-01A	-0.186039	-0.063998	0.226219	0.216212	0.344416	0.278328	0.488062	0.237699	0.115976	0.117931	-0.184657	0.178906	-0.0838602	0.355401	-0.00478893	0.00155011	0.164301	0.0237002	0.411979	0.301854	-0.00818062	-0.29668	0.403571	0.00793936	0.107012	0.041214	-0.100645	0.0300869
TCGA-XK-AAIV-01A	-0.0423678	0.199851	0.394529	0.250227	0.350618	0.307204	0.54635	0.284937	0.0975727	0.195071	-0.129374	0.28122	0.0898024	0.318173	0.0498203	0.0517316	0.395207	0.0781148	0.414549	0.314781	0.0568792	-0.237277	0.382383	0.198746	0.174128	0.120511	-0.0778172	0.0803196
TCGA-XK-AAIW-01A	-0.229442	0.166565	0.353474	0.129478	0.304169	0.265961	0.478861	0.207529	0.128787	0.0705531	-0.200064	0.212346	-0.0902135	0.310911	-0.0830883	-0.115948	0.167075	-0.0203092	0.403442	0.207376	-0.0201602	-0.257371	0.369594	0.00549594	0.0661362	0.0226455	-0.171222	0.0873771
TCGA-XK-AAJA-01A	-0.247321	-0.0510926	0.162885	0.164969	0.312448	0.291517	0.454296	0.185088	0.0270548	0.0465213	-0.0985256	0.217028	-0.0692135	0.286814	-0.0576417	0.0355142	0.0781337	-0.000730588	0.422076	0.238496	-0.0489322	-0.244561	0.360274	-0.0973597	0.0694764	-0.00107927	-0.0875607	-0.00295256
TCGA-XK-AAJP-01A	-0.304151	-0.0327786	0.186116	0.208059	0.335315	0.289889	0.407131	0.208209	0.0912359	0.126477	-0.21498	0.132791	-0.100663	0.285433	-0.0265457	-0.0781862	0.113285	0.0288417	0.408353	0.246098	-0.0270066	-0.24385	0.36278	-0.0567784	0.0747303	0.0086077	-0.0978783	0.053835
TCGA-XK-AAJR-01A	-0.294351	-0.0873599	0.140048	0.140481	0.334498	0.326137	0.45156	0.213329	0.0932028	0.0856104	-0.15789	0.164815	-0.14109	0.301923	-0.0325492	0.0181564	0.094861	0.00678935	0.399823	0.272697	-0.0363242	-0.228551	0.397519	-0.00645378	0.090996	0.00815826	-0.0881385	0.04599
TCGA-XK-AAJT-01A	-0.220456	-0.111619	0.205284	0.19582	0.338476	0.312165	0.494672	0.240641	0.0728198	0.148907	-0.104495	0.176718	-0.108285	0.355985	-0.000810511	0.053551	0.195978	-0.00249359	0.401843	0.317665	0.032873	-0.26273	0.396915	0.00468567	0.115683	0.0760778	-0.105639	0.0252707
TCGA-XK-AAJU-01A	-0.221782	-0.104215	0.23164	0.207421	0.355999	0.317388	0.498785	0.209407	0.0807653	0.113494	-0.146725	0.151923	-0.118808	0.348025	-0.0184795	0.00129344	0.146889	0.0215452	0.402962	0.312503	-0.0273812	-0.21611	0.387949	-0.0507897	0.0968612	0.0492771	-0.0749526	0.023911
TCGA-XQ-A8TA-01A	-0.360584	0.041728	0.0718297	0.0828492	0.217039	0.304175	0.385156	0.24146	0.0922479	0.0272897	-0.237281	0.171436	-0.266784	0.268935	-0.107643	-0.215543	0.00576322	0.013196	0.319389	0.13329	-0.0697617	-0.365363	0.309484	-0.129912	0.0134542	-0.0569653	-0.191447	-0.028132
TCGA-XQ-A8TB-01A	-0.321093	-0.0452447	0.159695	0.169585	0.324573	0.251913	0.484642	0.231455	0.092348	0.111494	0.0193004	0.147861	-0.108519	0.350118	-0.0271023	-0.0233421	0.112038	0.0278555	0.406628	0.286012	0.0141684	-0.280909	0.382827	-0.0122602	0.0872648	0.0771253	-0.118293	0.0138144
TCGA-Y6-A8TL-01A	-0.236652	-0.0792086	0.201795	0.116023	0.326648	0.272847	0.481341	0.189806	0.0640359	0.0601666	-0.125083	0.168764	-0.135472	0.307519	-0.0625462	-0.0166704	0.0508751	-0.03671	0.396548	0.273053	-0.0309148	-0.25441	0.340014	-0.0979289	0.0627537	0.0416777	-0.0678752	0.0389943
TCGA-Y6-A9XI-01A	-0.299122	-0.105784	0.17972	0.146165	0.357105	0.332498	0.45443	0.185685	0.0710949	0.0574836	-0.167715	0.166085	-0.159851	0.289828	-0.0509869	0.00647898	0.100389	-0.050222	0.413679	0.228507	-0.0461661	-0.250841	0.345665	-0.0708526	0.0714689	-0.00882196	-0.12095	0.00795634
TCGA-YJ-A8SW-01A	-0.322751	-0.0498602	0.150669	0.1268	0.284999	0.223737	0.430983	0.211486	0.0243866	0.0465047	-0.1709	0.166965	-0.119461	0.289937	-0.0900181	-0.0993537	0.0360593	-0.0100077	0.397677	0.226321	-0.0271842	-0.316117	0.325504	-0.0825029	0.0408807	-0.00892411	-0.121952	-0.0271021
TCGA-YL-A8HJ-01A	-0.185817	-0.0198262	0.262834	0.194492	0.332437	0.278818	0.51616	0.252315	0.129916	0.204942	-0.128774	0.171521	-0.051526	0.345036	0.0249978	0.0841139	0.254931	0.0198168	0.418629	0.336531	0.0434394	-0.247537	0.42333	0.103259	0.150291	0.111337	-0.0974561	0.0392146
TCGA-YL-A8HK-01A	-0.226687	-0.00907882	0.20756	0.200584	0.334992	0.331877	0.505387	0.223037	0.0698423	0.129154	-0.065526	0.169907	-0.1068	0.31983	-0.031315	0.0641655	0.195094	0.0219727	0.403741	0.298659	0.0091113	-0.245415	0.398172	0.0409162	0.0915343	0.0613349	-0.0952699	0.026066
TCGA-YL-A8HL-01A	-0.301479	-0.134647	0.132996	0.127394	0.340695	0.25367	0.418697	0.179923	0.0700596	0.0436324	-0.0648769	0.118943	-0.175304	0.304232	-0.0849643	-0.104385	0.0296186	-0.0382904	0.423483	0.202562	-0.0558035	-0.23833	0.349216	-0.0505544	0.0607591	-0.0148593	-0.13616	0.0319927
TCGA-YL-A8HM-01A	-0.215615	0.0711168	0.353168	0.195281	0.360289	0.197386	0.465551	0.277177	0.0930119	0.152661	-0.233475	0.230501	0.00528417	0.298037	-0.0387711	-0.0786584	0.220745	-0.0161902	0.419062	0.233676	-0.0333215	-0.219942	0.359634	0.0229295	0.0531106	0.0229634	-0.11135	0.0226916
TCGA-YL-A8HO-01A	-0.145865	0.0433975	0.28823	0.198285	0.326995	0.297026	0.537034	0.247455	0.0979387	0.162095	-0.0477432	0.250671	0.0424225	0.379754	0.0802284	0.112584	0.357356	0.0352973	0.419395	0.333696	0.0587925	-0.276757	0.437078	0.0914632	0.188104	0.116482	-0.109013	0.0556833
TCGA-YL-A8S8-01A	-0.323866	-0.0118981	0.166949	0.17032	0.314481	0.259411	0.481025	0.266484	0.0766389	0.0657853	-0.0382681	0.229037	-0.0991628	0.300877	-0.0752013	-0.0230888	0.0825511	-0.00530602	0.379604	0.26134	-0.0195738	-0.253556	0.352278	-0.0615021	0.0733394	0.0385769	-0.058534	0.024631
TCGA-YL-A8S9-01A	-0.307259	-0.0819231	0.114326	0.0882245	0.304827	0.253531	0.400319	0.180581	0.0587837	-0.010326	-0.163249	0.180166	-0.195961	0.328008	-0.0711169	-0.107158	-0.00670749	-0.0359453	0.418378	0.155481	-0.0810788	-0.2934	0.37743	-0.0995874	0.0332648	-0.0409427	-0.111212	0.0265412
TCGA-YL-A8SA-01A	-0.307289	-0.106015	0.156048	0.1449	0.336308	0.247981	0.42321	0.17691	0.0667846	0.0332392	0.0152341	0.141485	-0.144159	0.297516	-0.050864	-0.0884619	0.0490305	-0.04693	0.440822	0.236645	-0.0657793	-0.210726	0.376805	-0.0652782	0.0422648	0.0157304	-0.133824	-0.00417488
TCGA-YL-A8SB-01A	-0.238006	-0.0745684	0.197119	0.180099	0.33875	0.273682	0.503466	0.260853	0.0701039	0.0897091	-0.160975	0.204379	-0.0647539	0.334727	-0.0302707	0.0308911	0.162328	-0.00273135	0.405272	0.32021	0.00254384	-0.304365	0.412097	0.0195474	0.0974392	0.0473076	-0.107576	0.0160209
TCGA-YL-A8SC-01A	-0.272372	0.0287176	0.274422	0.208759	0.313525	0.253548	0.466707	0.227972	0.0905402	0.134592	-0.0759141	0.195357	-0.0438094	0.346247	-0.00686691	-0.0163202	0.207988	-0.0057589	0.405913	0.272489	-0.0223549	-0.238493	0.376581	0.0446249	0.0934617	0.0334897	-0.126421	0.00347763
TCGA-YL-A8SI-01A	-0.219486	-0.0316833	0.188895	0.16427	0.350942	0.287436	0.486949	0.248842	0.0880581	0.112989	-0.0716495	0.194787	-0.107133	0.346809	0.0151394	0.0517617	0.238543	-0.0293038	0.398656	0.312543	0.0103338	-0.104855	0.396441	0.0148073	0.1251	0.0751313	-0.0638567	0.0490798
TCGA-YL-A9WH-01A	-0.358208	0.0324721	0.153759	0.153818	0.349446	0.285335	0.477167	0.237388	0.0558808	0.025008	-0.098749	0.21628	-0.149914	0.304483	-0.0739884	-0.0873681	0.130967	0.00954768	0.398129	0.215543	-0.032555	-0.253017	0.340481	-0.020106	0.0552922	0.0066868	-0.138659	-0.0317448
TCGA-YL-A9WI-01A	-0.352791	-0.0149592	0.164213	0.149239	0.270844	0.195864	0.455968	0.259493	0.118307	0.0131346	-0.244062	0.241957	-0.0577737	0.275589	-0.105148	-0.100616	0.0340154	0.0316315	0.372594	0.24562	-0.0371906	-0.315903	0.323425	-0.0398338	0.0358029	-0.0201789	-0.11872	0.0093487
TCGA-YL-A9WJ-01A	-0.25343	0.0127851	0.23104	0.230065	0.330207	0.291821	0.515138	0.24448	0.0972588	0.152282	-0.0305538	0.228171	-0.0876605	0.331917	0.0133979	0.0937326	0.225596	0.02068	0.431227	0.319948	0.0212517	-0.23757	0.406706	0.0692218	0.146866	0.0809448	-0.0596864	0.0387429
TCGA-YL-A9WK-01A	-0.199831	0.0201835	0.261156	0.127955	0.296112	0.314663	0.475837	0.232651	0.140406	0.146435	-0.0906025	0.188196	-0.0827841	0.305785	-0.0368528	0.14264	0.161608	-0.074744	0.379707	0.285404	0.0103296	-0.287571	0.36929	0.0433349	0.114983	0.0730277	-0.110408	0.020716
TCGA-YL-A9WL-01A	-0.347156	-0.105589	0.133911	0.116273	0.306542	0.293272	0.428073	0.182908	0.0220929	0.0200428	-0.176094	0.126704	-0.234273	0.33033	-0.0776092	-0.124393	0.0375075	-0.0224679	0.441977	0.209687	-0.0737443	-0.263021	0.363312	-0.066453	0.025976	-0.0101411	-0.133175	-0.0299196
TCGA-YL-A9WX-01A	-0.114016	0.0140888	0.23667	0.242577	0.334434	0.304464	0.513095	0.230992	0.0719792	0.184093	0.0329176	0.151507	-0.0326556	0.357694	-0.0047583	0.131601	0.227832	0.0136107	0.405741	0.330028	0.000848196	-0.241934	0.396925	0.0185089	0.115769	0.0852613	-0.0765155	0.0277701
TCGA-YL-A9WY-01A	-0.150016	0.0853597	0.377229	0.259493	0.336277	0.307091	0.52964	0.232725	0.111048	0.198936	-0.110258	0.216028	0.0122227	0.339335	0.0420833	0.0453796	0.374581	0.0506406	0.389851	0.338946	0.0482287	-0.288668	0.413732	0.160593	0.149967	0.109072	-0.11637	0.0227819
TCGA-ZG-A8QW-01A	-0.286543	0.0409054	0.285365	0.213843	0.333048	0.299554	0.506128	0.23564	0.0534598	0.134936	-0.0617551	0.196158	-0.101895	0.318581	0.0248817	-0.0117802	0.260302	0.00801507	0.40617	0.32578	0.0179076	-0.225781	0.367799	0.0191463	0.125214	0.0688654	-0.0942267	0.0568354
TCGA-ZG-A8QX-01A	-0.13865	-0.0148211	0.215236	0.15255	0.341274	0.24293	0.476058	0.20214	0.103821	0.0285418	-0.0564646	0.206489	-0.0758623	0.292953	-0.0658912	0.0145031	0.0552241	-0.0693817	0.385657	0.262476	-0.0303043	-0.290323	0.334592	-0.0762805	0.0929815	0.0551259	-0.0762796	0.033539
TCGA-ZG-A8QY-01A	-0.279829	-0.0563802	0.148877	0.101276	0.333499	0.291555	0.459149	0.222956	0.137061	0.0724661	-0.135557	0.108871	-0.158911	0.31525	-0.064463	0.0360044	0.0867731	-0.015766	0.3797	0.273656	-0.0378524	-0.301487	0.372379	-0.0268849	0.0782011	0.000800806	-0.130241	0.0826941
TCGA-ZG-A8QZ-01A	-0.213917	0.00441712	0.261134	0.220958	0.345181	0.282104	0.516161	0.221983	0.115332	0.142126	-0.00901235	0.158627	-0.0717753	0.363473	0.00248957	0.0536276	0.228069	0.047235	0.356602	0.340317	0.0123026	-0.288982	0.391377	0.0456613	0.134475	0.0820325	-0.101419	0.0715012
TCGA-ZG-A9KY-01A	-0.081279	0.14243	0.418204	0.174047	0.305184	0.306799	0.477198	0.221671	0.142545	0.160099	-0.145503	0.260614	0.0168744	0.303529	-0.00795767	-0.0873694	0.180792	-0.0101047	0.427765	0.266596	-0.00680451	-0.301636	0.363091	0.0213621	0.100796	0.0572458	-0.153862	0.0488363
TCGA-ZG-A9L0-01A	-0.256863	0.0567634	0.292109	0.2376	0.37686	0.309972	0.537462	0.276253	0.125659	0.180832	-0.0912293	0.219686	-0.0459991	0.3385	0.0419322	0.0886383	0.329254	0.0445224	0.401135	0.329712	0.0777362	-0.249842	0.410608	0.134433	0.147951	0.108077	-0.0853072	0.0776294
TCGA-ZG-A9L1-01A	-0.307531	-0.11285	0.0985723	0.0602934	0.29804	0.201744	0.436206	0.181078	0.120313	-0.0215422	-0.0357964	0.138112	-0.206355	0.264053	-0.0656808	-0.0248093	0.0345513	-0.0155849	0.37173	0.266511	-0.0093991	-0.203364	0.321302	-0.0552062	0.00362916	0.0266784	-0.11241	0.0354096
TCGA-ZG-A9L2-01A	0.00140425	0.103873	0.336136	0.174627	0.345055	0.280635	0.523757	0.255328	0.15754	0.187813	-0.0574111	0.204751	0.0531223	0.343073	0.0166305	0.0467594	0.267472	0.0472422	0.395047	0.357209	0.0359524	-0.26272	0.380944	0.0632518	0.175309	0.136648	-0.11863	0.0719808
TCGA-ZG-A9L4-01A	-0.274597	0.0290694	0.22029	0.193665	0.347173	0.295699	0.497038	0.241015	0.120436	0.119281	0.0160223	0.17008	-0.141489	0.348879	-0.0168276	0.113211	0.16025	0.0298326	0.394206	0.325017	0.0536061	-0.260119	0.406251	0.0101287	0.143663	0.103378	-0.0584939	0.0878812
TCGA-ZG-A9L5-01A	-0.31887	-0.0449453	0.176843	0.13056	0.276357	0.252915	0.424225	0.225795	0.0644352	0.0492393	-0.105489	0.20643	-0.125682	0.314309	-0.0606816	0.0445263	0.106722	-0.0568174	0.368969	0.242644	-0.0395366	-0.320422	0.331251	-0.008958	0.0588322	-0.0261408	-0.15837	-0.000505075
TCGA-ZG-A9L6-01A	-0.230335	-0.0868978	0.210849	0.164882	0.355057	0.304681	0.517134	0.24415	0.102138	0.12091	-0.122641	0.193087	-0.056059	0.364147	0.0194839	0.0533346	0.209626	-0.0355101	0.408863	0.328015	0.0429594	-0.257314	0.414049	0.0229436	0.140464	0.0848183	-0.0662949	0.0305489
TCGA-ZG-A9L9-01A	-0.236303	0.0724064	0.303519	0.188876	0.318532	0.233921	0.509972	0.27054	0.156116	0.171612	-0.0337714	0.217845	-0.0680661	0.328966	0.0285779	0.0974626	0.315653	0.0342671	0.388127	0.318976	0.0635626	-0.259057	0.383875	0.0694563	0.168573	0.1124	-0.116788	0.0400356
TCGA-ZG-A9LB-01A	-0.243404	0.107642	0.316206	0.192528	0.311987	0.285155	0.489267	0.304432	0.117578	0.160626	0.0212927	0.22555	-0.0927453	0.342197	0.03349	0.142529	0.220371	0.0282686	0.386929	0.284035	0.0573987	-0.227563	0.367985	-0.00261217	0.130969	0.0887239	-0.0328635	0.0670024
TCGA-ZG-A9LM-01A	-0.269369	-0.0412631	0.227721	0.19911	0.335536	0.266849	0.507636	0.244708	0.0727641	0.114911	-0.0815651	0.221653	-0.0562371	0.330681	-0.00631302	-0.0456982	0.173497	-0.019401	0.389032	0.2764	0.0130365	-0.270312	0.365567	-0.00426482	0.0990157	0.0490788	-0.059796	0.014863
TCGA-ZG-A9LN-01A	0.0204904	0.191091	0.49671	0.238389	0.336215	0.262424	0.569798	0.241188	0.117941	0.229304	0.00222025	0.205218	0.123211	0.336801	0.023859	0.122179	0.364906	0.0617268	0.426536	0.372457	0.0671128	-0.252618	0.398383	0.11711	0.181328	0.168096	-0.0973053	0.114722
TCGA-ZG-A9LS-01A	-0.0334529	0.0546161	0.374024	0.203121	0.340252	0.283313	0.53873	0.223823	0.106157	0.200822	-0.065054	0.229935	0.0483941	0.35645	0.0396062	0.00820234	0.304635	0.041404	0.389478	0.350343	0.0565413	-0.284981	0.429353	0.0548484	0.147613	0.135287	-0.0245996	0.0453282
TCGA-ZG-A9LU-01A	-0.228713	9.87742e-05	0.304345	0.18224	0.357099	0.376528	0.50518	0.231571	0.0635201	0.152542	-0.0653414	0.210045	-0.115547	0.335266	0.00502818	0.0278082	0.245445	0.0359714	0.405617	0.314133	-0.002181	-0.263435	0.393626	-0.00789963	0.122516	0.0550033	-0.039655	0.029693
TCGA-ZG-A9LY-01A	-0.282313	-0.0371013	0.196718	0.189739	0.355974	0.325197	0.504689	0.255349	0.0991111	0.120548	-0.00190902	0.147785	-0.0708592	0.369851	0.0075449	0.106116	0.195225	0.0137635	0.395003	0.337803	0.0107398	-0.252932	0.40639	0.0497891	0.0958427	0.0668605	-0.103215	0.0212718
TCGA-ZG-A9LZ-01A	-0.203634	0.0126956	0.260565	0.169527	0.33769	0.280877	0.466434	0.215136	0.0759056	0.13514	-0.0375612	0.168149	-0.0673338	0.369558	-0.0235686	-0.0472128	0.210394	-0.0137647	0.378007	0.267579	0.0179179	-0.222421	0.374409	-0.00359642	0.0908385	0.0537206	-0.086743	0.0111103
TCGA-ZG-A9M4-01A	-0.110594	0.0958724	0.374878	0.209446	0.351492	0.276169	0.531282	0.230344	0.0642344	0.146639	-0.0799329	0.194645	-0.0228957	0.282226	-0.0283107	0.0217619	0.238442	-0.0304617	0.405816	0.294087	0.0119817	-0.326451	0.407833	0.0144526	0.129931	0.0910988	-0.121741	0.0320043
TCGA-ZG-A9MC-01A	0.0813806	0.170283	0.413714	0.27883	0.358155	0.3215	0.566556	0.274739	0.119677	0.270467	-0.0295542	0.215274	0.153451	0.349893	0.104912	0.0773222	0.405008	0.0772272	0.417391	0.377033	0.0892102	-0.261216	0.418288	0.144156	0.169763	0.179918	-0.0178273	0.0935323
TCGA-ZG-A9N3-01A	0.0181025	0.239069	0.302387	0.143601	0.337716	0.257259	0.489601	0.214235	0.126656	0.0784348	0.00172697	0.215837	0.0515477	0.274789	-0.0402393	0.0141654	0.220061	0.070816	0.350222	0.288553	0.000943206	-0.250828	0.32384	-0.0358982	0.111923	0.082227	-0.0949633	0.073288
TCGA-ZG-A9ND-01A	-0.355978	-0.000648475	0.223573	0.119553	0.335057	0.267748	0.437882	0.209758	0.0569208	0.0297545	-0.0574547	0.159707	-0.16267	0.288196	-0.0740673	0.0211835	0.0795414	-0.0678518	0.406385	0.215842	-0.042589	-0.253994	0.339238	-0.0653604	0.0874502	0.00812606	-0.0672148	0.0170131
TCGA-ZG-A9NI-01A	-0.314665	-0.0414885	0.173605	0.158693	0.317759	0.277869	0.494482	0.273126	0.106521	0.0882996	-0.0861067	0.185095	-0.124545	0.33541	0.013759	0.0714612	0.145035	-0.0258005	0.385983	0.312159	0.0489178	-0.303764	0.380049	0.0393681	0.124836	0.0506236	-0.0855934	0.0196842

## Sheet: cibersort_res
sample	B_cells_naive	B_cells_memory	Plasma_cells	T_cells_CD8	T_cells_CD4_naive	T_cells_CD4_memory_resting	T_cells_CD4_memory_activated	T_cells_follicular_helper	T_cells_regulatory_(Tregs)	T_cells_gamma_delta	NK_cells_resting	NK_cells_activated	Monocytes	Macrophages_M0	Macrophages_M1	Macrophages_M2	Dendritic_cells_resting	Dendritic_cells_activated	Mast_cells_resting	Mast_cells_activated	Eosinophils	Neutrophils
TCGA-2A-A8VL-01A	0.00243773	0	0.49177	0.0926374	0	0.140718	0	0	0.0030185	0	0	0.081512	0.00499624	0	0.0558561	0.0380796	0.030006	0	0.0589685	0	0	0
TCGA-2A-A8VO-01A	0.0405458	0	0.196938	0.0537376	0	0.186934	0	0.0582746	0.00514475	0	0	0.0396238	0.018087	0.136251	0.0542554	0.0603223	0	0	0.148088	0	0	0.00179719
TCGA-2A-A8VT-01A	0.0365456	0	0.0114298	0.0582819	0	0.327017	0	0.057704	0.0652015	0	0	0.0194564	0.00800743	0.0683368	0.151739	0.0901058	0.0585406	0	0.0476338	0	0	0
TCGA-2A-A8VV-01A	0.0995031	0	0.0653576	0.156419	0	0.240131	0	0.0181319	0	0	0	0.027362	0	0.0192283	0.0579349	0.0822339	0.0507458	0	0.182952	0	0	0
TCGA-2A-A8VX-01A	0.112066	0	0.111011	0.104511	0	0.222632	0	0.0132498	0.0101967	0	0	0.100883	0.0102547	0	0.0503584	0.119009	0.0638944	0	0.0783543	0.00358097	0	0
TCGA-2A-A8W1-01A	0	0	0.0779223	0.0958504	0	0.188908	0	0.0219716	0	0.0609026	0	0.0423465	0.0371088	0.0816732	0.0752802	0.22199	0	0.0282388	0.067807	0	0	0
TCGA-2A-A8W3-01A	0.0782068	0	0.0185963	0.124294	0	0.196725	0	0.0750081	0	0	0	0.031457	0.00856214	0.0116541	0.0628872	0.131412	0.0758606	0	0.185337	0	0	0
TCGA-2A-AAYF-01A	0.0670824	0	0.29192	0.0653274	0	0.0877205	0	0.0201036	0.0196618	0.0193838	0	0.0567024	0.0183322	0.120282	0.0505608	0.0822373	0	0	0.100686	0	0	0
TCGA-2A-AAYO-01A	0.0816974	0.0114477	0.0920099	0.0599932	0	0.182869	0	0.0831596	0.0422608	0.0179287	0	0.0330615	0.00513225	0.0926784	0.071539	0.0670432	0	0	0.15918	0	0	0
TCGA-2A-AAYU-01A	0.00890219	0	0.0942043	0.0559737	0	0.172537	0	0	0.00397518	0.0128666	0	0.0501668	0	0.167415	0.111868	0.0608033	0.0392631	0	0.222025	0	0	0
TCGA-4L-AA1F-01A	0.0524847	0	0.0238756	0.0415202	0	0.155988	0.000249783	0.0253331	0.00593482	0.0318922	0	0.016481	0	0.374228	0.0866381	0.141521	0.00726286	0	0.0365903	0	0	0
TCGA-CH-5737-01A	0.0865702	0	0.294111	0.0164508	0	0.0968433	0	0.0517049	0.00230631	0.00965417	0	0.0360814	0.00176437	0.155459	0.0675065	0.0807566	0.0196925	0	0.0738045	0	0	0.00729489
TCGA-CH-5738-01A	0.0828338	0	0.0333705	0.0720975	0	0.132058	0.0143336	0.030249	0.0252004	0	0	0.0314474	0.0934369	0.130348	0.0400922	0.185557	0.0280622	0	0.0643251	0.00857467	0.0119497	0.0160639
TCGA-CH-5739-01A	0.112709	0	0.0622103	0.0578308	0	0.29818	0.0222318	0.0610643	0	0	0	0.0234568	0.0196323	0	0.117005	0.0835222	0.0718438	0	0.067655	0	0	0.00265907
TCGA-CH-5740-01A	0.0343388	0	0.159274	0.0683797	0	0.273609	0	0.0129461	0	0	0	0.00427212	0.028473	0.0556689	0.198322	0.075892	0.00711085	0	0.079701	0	0.0020124	0
TCGA-CH-5741-01A	0.0224773	0	0.0578844	0.13614	0	0.24961	0	0.0125473	0.0664513	0	0	0.0321288	0.0108686	0.0730765	0.0440625	0.144675	0.0220163	0.00670113	0.121361	0	0	0
TCGA-CH-5743-01A	0	0	0.0615313	0.243774	0	0.193915	0.0410103	0.0294422	0.0377907	0	0	0.0216271	0.0237432	0	0.0869234	0.100695	0.108449	0.00306516	0.0231205	0.0131546	0	0.0117585
TCGA-CH-5744-01A	0.00402818	0	0.291641	0.11256	0	0.143889	0.00140618	0.00731495	0	0	0	0.0583673	0.0258719	0.107242	0.0649255	0.0401976	0.010227	0	0.131051	0	0.0012783	0
TCGA-CH-5745-01A	0.100751	0	0.0496228	0.11731	0	0.242066	0	0.0597365	0	0.0261261	0	0.0301183	0.0224617	0.0453833	0.0885177	0.0786726	0.0275614	0	0.111673	0	0	0
TCGA-CH-5746-01A	0.0467456	0	0.259081	0.0949835	0	0.207927	0	0.0358874	0.0368375	0	0	0.00508064	0.00442462	0.0582368	0.0294318	0.0987046	0.0325988	0.00780631	0.0507877	0.022348	0	0.00911865
TCGA-CH-5748-01A	0.104907	0	0.219745	0.0336789	0	0.161277	0	0.0495694	0	0.0380167	0	0.0304313	0.00744572	0.0826262	0.0917773	0.0678578	0.017895	0	0.0947719	0	0	0
TCGA-CH-5750-01A	0.163728	0	0.103443	0	0	0.21484	0.0334113	0.0258666	0.00434514	0.106867	0	0	0.00564835	0.137733	0.126993	0.0290673	0	0	0	0.0480565	0	0
TCGA-CH-5751-01A	0.139827	0	0.0770513	0.246842	0	0.154385	0.0179468	0.0120776	0.0734794	0.0149749	0	0	0	0.0849696	0.080606	0.0889642	0	0	0.00887583	0	0	0
TCGA-CH-5752-01A	0.0865348	0	0.206153	0.0265324	0	0.239166	0	0.0411294	0	0.00185541	0	0.0386002	0.00989742	0.0197287	0.0847339	0.161627	0.0328062	0	0	0.0426993	0	0.0085364
TCGA-CH-5753-01A	0.118943	0	0.0889023	0	0	0.230437	0	0.100311	0	0.0344212	0	0.034146	0.00815214	0.119942	0.125107	0.110263	0	0.00771009	0.0216644	0	0	0
TCGA-CH-5754-01A	0.0254438	0	0.093957	0.0154858	0	0.308071	0	0.0505257	0	0.0156881	0	0.0316367	0.019938	0.0660823	0.194201	0.0726312	0.0290793	0	0.0758802	0	0.00137969	0
TCGA-CH-5761-01A	0.0651408	0	0.0109156	0	0	0.160385	0	0.0148288	0.0319959	0	0	0	0	0.495377	0.0361753	0.104641	0	0	0.0805415	0	0	0
TCGA-CH-5762-01A	0.0761458	0	0.0791302	0.0525528	0	0.311674	0	0.0725544	0.00205599	0.0122212	0	0.0294956	0.00182851	0.0848525	0.0720395	0.0652314	0.0276902	0.0062311	0.0849951	0.0213019	0	0
TCGA-CH-5763-01A	0.0747327	0	0.114943	0.083717	0	0.260565	0.0107281	0.0316986	0	0	0	0.0106081	0.0271373	0.0874623	0.0483098	0.111188	0.035662	0.00198026	0.0618133	0.0290113	0.00157129	0.00887243
TCGA-CH-5764-01A	0.0402474	0	0.173229	0.0335264	0	0.253755	0	0	0	0.0369982	0	0.0527227	0.0157566	0.127859	0.126555	0.0323309	0.0173768	0	0.0818296	0	0.00781319	0
TCGA-CH-5765-01A	0.077234	0	0.211075	0	0	0.145312	0	0.0208763	0	0.0240492	0	0.0278236	0.0150064	0.16674	0.0781415	0.105248	0.0308847	0	0.0976089	0	0	0
TCGA-CH-5766-01A	0.130619	0	0.175852	0.0954983	0	0.171893	0	0.0756723	0	0.0147695	0	0.047914	0	0.0398225	0.0921051	0.0822501	0.0219307	0.00204732	0.0421362	0.00749042	0	0
TCGA-CH-5767-01A	0.0935065	0	0.149477	0.0369579	0	0.206852	0	0.0514196	0.00942491	0	0	0.0433002	0.0143003	0.0353928	0.0300541	0.136017	0.012948	0.0137338	0.073886	0.0757856	0	0.0169447
TCGA-CH-5768-01A	0.0585481	0	0.244981	0.0922571	0	0.134282	0	0.034846	0.00510949	0	0	0.0190596	0	0.200654	0.0601306	0.0933633	0.0252731	0	0.0314949	0	0	0
TCGA-CH-5769-01A	0.114893	0	0.0287436	0.0675247	0	0.228157	0.0135537	0.0494113	0	0.00249663	0	0.0568334	0.00699544	0.0440539	0.0901398	0.145667	0.0629214	0	0.0886086	0	0	0
TCGA-CH-5771-01A	0.0864999	0	0	0.089461	0	0.182689	0	0.0361666	0.0686888	0	0	0.0307892	0.0646853	0.0740323	0.0459036	0.147195	0.0966971	0.00917042	0.0680218	0	0	0
TCGA-CH-5772-01A	0.103323	0	0.065287	0.0773884	0	0.275932	0	0.0472124	0	0.0134133	0	0.0379805	0.00437905	0	0.0740883	0.0924512	0.0103374	0	0.19413	0	0	0.00407794
TCGA-CH-5788-01A	0.0313689	0	0.127472	0.0134131	0	0.217285	0	0.00924103	0.0126205	0	0	0.0194832	0	0.280152	0.0572497	0.132487	0.0392106	0	0.0600174	0	0	0
TCGA-CH-5789-01A	0.000697064	0	0.190803	0.0261106	0	0.245363	0	0.00661402	0	0	0	0.0614861	0.131337	0.012022	0.0214571	0.132911	0.0142447	0	0.128261	0	0.0113228	0.01737
TCGA-CH-5790-01A	0.102896	0	0.23445	0.0267858	0	0.194574	0	0	0	0.00363184	0	0.00317332	0.0633325	0.198398	0.04999	0.052766	0	0	0.0700016	0	0	0
TCGA-CH-5791-01A	0.00278396	0.00356492	0.0268472	0.033631	0	0.224821	0	0.0363261	0.0286854	0	0	0.0561996	0.0929519	0.0801236	0.0751653	0.110651	0.03448	0.00793039	0.185838	0	0	0
TCGA-CH-5792-01A	0.00650671	0.00847403	0.0682228	0.0874766	0	0.210174	0	0.0521165	0.0543614	0	0	0.0263637	0.0290803	0.09087	0.114811	0.140406	0.0459596	0	0.0651781	0	0	0
TCGA-CH-5794-01A	0.0726696	0	0.132019	0.0603078	0	0.196716	0	0.0298115	0.0230848	0	0	0.0479111	0.0127517	0.200166	0.087136	0.0413132	0.0188239	0	0.0772885	0	0	0
TCGA-EJ-5494-01A	0.0526367	0	0.0376303	0.0930424	0	0.251196	0	0.0279202	0	0	0	0.062008	0.0110724	0.0800833	0.0852014	0.111719	0.040197	0	0.147293	0	0	0
TCGA-EJ-5495-01A	0.085278	0	0.0634929	0.0769863	0	0.24189	0.000522658	0.0460525	0.0250362	0.00127083	0	0.0163063	0	0.0823382	0.10686	0.0831463	0.0724607	0	0.0983583	0	0	0
TCGA-EJ-5496-01A	0.0573661	0	0.0993399	0.0468549	0	0.212272	0	0.0551085	0	0.00959532	0	0.0499513	0	0.15169	0.0947205	0.0413341	0	0	0.181768	0	0	0
TCGA-EJ-5497-01A	0.109533	0	0.108319	0.0411897	0	0.384175	0	0	0	0	0	0.0158537	0.0165037	0.0954378	0.0354038	0.0446242	0.046607	0	0.102353	0	0	0
TCGA-EJ-5498-01A	0.0488501	0	0.141417	0.0831313	0	0.319015	0	0	0.00774372	0	0	0.0765873	0.0338422	0.069032	0.0649048	0.0364703	0.00354847	0	0.112489	0	0.00296906	0
TCGA-EJ-5499-01A	0.0414026	0	0.0675868	0.0895126	0	0.180779	0.0257717	0.0690478	0.0198197	0.0190837	0	0.0431526	0	0	0.109126	0.0858399	0.106928	0	0.14195	0	0	0
TCGA-EJ-5501-01A	0.0779844	0	0.0812904	0.0250317	0	0.310224	0	0.0330401	0.00590409	0	0	0.0649923	0.00380165	0.0468094	0.116641	0.0585884	0.0606645	0	0.115027	0	0	0
TCGA-EJ-5502-01A	0.0049823	0	0.101459	0.0936545	0	0.249441	0.0172372	0.0355922	0.0830392	0	0	0.028567	0.0877063	0.0630776	0.0487732	0.0691333	0.0256659	0.00943306	0.0806698	0	0	0.00156825
TCGA-EJ-5503-01A	0.043842	0	0.191487	0.0515646	0	0.29839	0	0.0141686	0	0	0	0.0330625	0.00778621	0.143819	0.0278625	0.0457797	0.0153575	0.0159162	0.107701	0	0	0.0032637
TCGA-EJ-5504-01A	0.0276556	0	0.190588	0.00584367	0	0.223612	0	0.0172386	0.00237899	0	0	0.0418735	0.0353343	0.00731368	0.086046	0.212429	0.0170534	0	0.132633	0	0	0
TCGA-EJ-5505-01A	0.0752892	0	0.102666	0.0845303	0	0.180955	0	0.0105287	0	0	0	0.0528427	0.012606	0.0215674	0.0509614	0.0964705	0.0129691	0	0.298614	0	0	0
TCGA-EJ-5506-01A	0.101774	0	0.159948	0.0867903	0	0.214008	0.00347034	0.0433546	0.0062822	0.000517514	0	0.0190621	0.000503208	0	0.138473	0.0774589	0.0486631	0	0.0996939	0	0	0
TCGA-EJ-5507-01A	0.0418954	0	0.0168213	0.0723498	0	0.220972	0.0167972	0.00708166	0.0241396	0	0	0.0383282	0	0.0710108	0.225245	0.0537753	0.0882291	0	0.123355	0	0	0
TCGA-EJ-5508-01A	0.0787019	0	0.0536733	0.0897632	0	0.244312	0	0.0402656	0	0.00679724	0	0.0255337	0.00288188	0.110818	0.0859334	0.0946665	0.0777845	0	0.0888693	0	0	0
TCGA-EJ-5509-01A	0.0402642	0	0.0221775	0.058241	0	0.132862	0	0.0326925	0.0392928	0	0	0.0238231	0	0.334113	0.0625967	0.115531	0.0199311	0	0.118475	0	0	0
TCGA-EJ-5510-01A	0	0	0.147256	0.145053	0	0.213895	0	0.0414957	0.0184093	0.0042545	0	0.0429252	0.0015658	0.00990849	0.104106	0.0454391	0.0588815	0	0.166811	0	0	0
TCGA-EJ-5511-01A	0.030609	0	0.11486	0	0	0.2901	0	0.0129979	0	0	0	0.0549281	0.0312368	0.0598769	0.0688945	0.122525	0.0433417	0	0.170631	0	0	0
TCGA-EJ-5512-01A	0.0341537	0	0.184811	0.0452634	0	0.275319	0	0.0183142	0.000202515	0	0	0.0507716	0.0255585	0.152906	0.0546237	0	0.00828303	0	0.14932	0	0.000473796	0
TCGA-EJ-5514-01A	0.0542871	0	0.0599763	0.0215628	0	0.275788	0.0122538	0.0238723	0	0.0119913	0	0.0276426	0	0.0471944	0.0836989	0.198314	0.0423549	0.000790084	0.139277	0	0	0.000996572
TCGA-EJ-5515-01A	0.0884087	0	0.140944	0.145394	0	0.224403	0	0.0236878	0	0.0143611	0	0.0282381	0.0112345	0	0.0577016	0.0695429	0.0620753	0	0.131542	0	0	0.00246604
TCGA-EJ-5516-01A	0.0660901	0	0.0349598	0.063045	0	0.310055	0.0245351	0.0361114	0	0.00198266	0	0.0124743	0.00935476	0	0.103943	0.163707	0.0535098	0	0.11269	0	0	0.00754224
TCGA-EJ-5517-01A	0.125387	0	0.167594	0.0881782	0	0.232904	0	0.020755	0	0.0524126	0	0.0324056	0	0.0555644	0.0437182	0.057638	0.00835048	0.0200761	0.0949346	0	0	8.18825e-05
TCGA-EJ-5518-01A	0.0118678	0	0.0595265	0.0119252	0	0.332238	0	0	0	0.023543	0	0.0501758	0.0204704	0.0343226	0.0830193	0.201944	0.0452462	0	0.12572	0	0	0
TCGA-EJ-5519-01A	0.0701491	0	0.158683	0.0831649	0	0.181294	0	0.00465736	0.00905424	0	0	0.0490895	0.0401942	0.122959	0.0310291	0.101798	0.00207397	0.000344584	0.145509	0	0	0
TCGA-EJ-5521-01A	0.0289038	0	0.137325	0.0859171	0	0.156121	0	0.0485863	0.0177818	0	0	0.0439015	0.00863451	0.0562773	0.0558907	0.197313	0.0198362	0	0.143512	0	0	0
TCGA-EJ-5522-01A	0.0256267	0	0.0681527	0.110047	0	0.345119	0.0115932	0.0246846	0.0134592	0	0	0.0139924	0.0165504	0.0167204	0.0997134	0.0524278	0.0879858	0	0.113927	0	0	0
TCGA-EJ-5524-01A	0.0566866	0	0.042058	0.110838	0	0.35623	0.0147523	0	0.00140907	0.0427026	0	0	0	0.0138323	0.0943552	0.0865057	0.0899795	0	0.0906505	0	0	0
TCGA-EJ-5525-01A	0.11916	0	0.0369128	0.00978008	0	0.280109	0	0.0395323	0.00247389	0	0	0.0177249	0.0194845	0.103956	0.0622744	0.167445	0.0738163	0	0.0673305	0	0	0
TCGA-EJ-5526-01A	0.0620108	0	0.134085	0.0772293	0	0.278482	0.00602257	0.00498513	0	0	0	0.0155813	0	0.0704827	0.0579527	0.124357	0.0572961	0	0.10571	0	0	0.00580536
TCGA-EJ-5527-01A	0.0573948	0	0.0458303	0.0308073	0	0.344863	0	0.0173411	0.0166281	0.0235961	0	0.0204778	0.00745325	0.0395938	0.110711	0.0887568	0.0509834	0.0097144	0.135848	0	0	0
TCGA-EJ-5530-01A	0.0876664	0	0.0838404	0.0553043	0	0.19853	0	0.0803832	0	0.010601	0	0.0365463	0.00600409	0.0289151	0.0735802	0.0811831	0.0789419	0	0.178504	0	0	0
TCGA-EJ-5531-01A	0.0454468	0	0.118949	0.109351	0	0.145844	0	0.00933103	0.0238609	0	0	0.0161882	0.0242088	0.202765	0.0146919	0.0787981	0.0739507	0.0156676	0.120946	0	0	0
TCGA-EJ-5532-01A	0.0849252	0	0.0631173	0.0363286	0	0.380248	0	0.025945	0	0	0	0.0214784	0.0186364	0.016745	0.075104	0.124341	0.0247246	0.00607737	0.120782	0	0	0.00154726
TCGA-EJ-5542-01A	0.0693393	0	0.107025	0.0408114	0	0.421788	0.0168567	0	0	0	0	0	0.00832613	0	0.0649698	0.101544	0.100294	0	0.0685997	0	0	0.000446624
TCGA-EJ-7115-01A	0.0934691	0	0.0561215	0.113445	0	0.207035	0	0.0349618	0.0250315	0	0	0.0101403	0.0299312	0	0.0543146	0.153766	0.0306036	0	0.19118	0	0	0
TCGA-EJ-7123-01A	0.0551441	0	0.161778	0.0623457	0	0.159304	0	0.0404423	0.0240145	0	0	0.0246327	0.00766912	0.0920618	0.0515113	0.156077	0.0142404	0.0105661	0.140213	0	0	0
TCGA-EJ-7125-01A	0.00371424	0	0.0739589	0.0934388	0	0.170752	0	0.0616551	0	0	0	0.0885137	0.0431487	0.121311	0.0565653	0.0899497	0.00878944	0	0.174444	0	0.0137591	0
TCGA-EJ-7314-01A	0.135518	0	0.185473	0.110042	0	0.134423	0	0	0	0	0	0.0330408	0.0349744	0.126463	0.0272812	0	0.00648633	0.0345205	0.152487	0	0.0192909	0
TCGA-EJ-7315-01A	0.0165215	0.104965	0.0387877	0.139572	0	0.217741	0	0.0235084	0.0828923	0	0	0.0710476	0.000215816	0.0553013	0.0564866	0.0668017	0.015494	0.0106563	0.100008	0	0	0
TCGA-EJ-7317-01A	0.0822171	0	0.198384	0.0124504	0	0.17968	0	0.051685	0	0	0	0.0633654	0.0337465	0	0.0359033	0.13342	0.0344937	0.00394633	0.170709	0	0	0
TCGA-EJ-7321-01A	0	0.0198269	0.0884264	0.134838	0	0.187762	0.0169781	0.0652699	0.00939127	0.0644957	0	0.0502058	0	0.0613586	0.107403	0.0379058	0.0746688	0.0133535	0.068116	0	0	0
TCGA-EJ-7327-01A	0.00653481	0	0.0687391	0.0413439	0	0.326315	0	0.0119135	0.00917742	0	0	0.0367433	0.0376873	0.0379428	0.131591	0.0934115	0.0415497	0	0.15705	0	0	0
TCGA-EJ-7328-01A	0.0185732	0	0.0658876	0.161612	0	0.26747	0	0	0.0266157	0	0	0.0258722	0.0455175	0.0615628	0.123412	0.0582905	0.0424773	0	0.102709	0	0	0
TCGA-EJ-7330-01A	0.115708	0	0.136479	0.109939	0	0.202851	0	0.0536281	0.00349606	0	0	0.0206561	0.0355283	0	0.0499054	0.090416	0.0260247	0.024545	0.107813	0.00913612	0	0.0138741
TCGA-EJ-7331-01A	0.0764981	0	0.187316	0.0319019	0	0.189888	0	0	0.00286473	0	0	0.0210775	0.0334388	0.0748669	0.0716316	0.0687111	0.0215133	0	0.195938	0	0	0.0243548
TCGA-EJ-7781-01A	0.0536644	0	0.196641	0.0737065	0	0.168231	0	0.0529133	0.0128375	0	0	0.0270802	0.020419	0.0898318	0.0523906	0.0587213	0.0563669	0	0.128917	0	0	0.00827922
TCGA-EJ-7782-01A	0.0455572	0	0.0242269	0.0124231	0	0.324997	0	0.0215865	0.0367432	0	0	0.00282424	0	0.0948524	0.0981472	0.10689	0.110818	0	0.120934	0	0	0
TCGA-EJ-7783-01A	0.00251511	0	0.179727	0.0555534	0	0.21746	0	0	0.00184081	0	0	0.0735601	0.0625384	0.112904	0.0491184	0.0123205	0.0441742	0	0.180713	0	0.00757558	0
TCGA-EJ-7784-01A	0.0823014	0	0.135852	0.0772562	0	0.359773	0.00450111	0.00174917	0	0	0	0.00802229	0.000423876	0.0229004	0.0981515	0.0910234	0.0570715	0.00164922	0.0593245	0	0	0
TCGA-EJ-7785-01A	0.0836679	0	0.234106	0.0583249	0	0.129943	0	0.0392919	0	0	0	0.0306887	0.0184503	0.0698963	0.045082	0.0436954	0.0899409	0	0.146343	0	0	0.0105696
TCGA-EJ-7786-01A	0.108513	0	0.0963079	0.00688453	0	0.408526	0	0.0216591	0	0	0	0.00780243	0.0146527	0.0146495	0.0735769	0.101219	0.00221687	0	0.143992	0	0	0
TCGA-EJ-7788-01A	0.0730209	0	0.0423487	0.0822127	0	0.327494	0	0.0093733	0	0	0	0.0239047	0.0135331	0	0.0675686	0.132647	0.116107	0	0.111791	0	0	0
TCGA-EJ-7789-01A	0.0740436	0	0.0505365	0.0307429	0	0.142962	0	0	0.0339628	0	0	0.0219494	0.00257544	0	0.0349127	0.242064	0.104616	0	0.261634	0	0	0
TCGA-EJ-7791-01A	0.0744687	0	0.0719415	0.0354072	0	0.300748	0	0.0703831	0	0	0	0.0299331	0.0040649	0.0333365	0.0514012	0.137555	0.0384476	0.000910184	0.150466	0	0	0.000936847
TCGA-EJ-7792-01A	0.0865022	0	0.0872877	0.0564882	0	0.225475	0	0.0525699	0.0232788	0	0	0.0559883	0.0182097	0.0433988	0.0376949	0.0925143	0.0382573	0.0013803	0.180955	0	0	0
TCGA-EJ-7793-01A	0.100469	0	0.265444	0.109172	0	0.179771	0	0	0	0	0	0.0522826	0.0115866	0.0812225	0.058879	0.056552	0	0	0.0846212	0	0	0
TCGA-EJ-7794-01A	0.074211	0	0.148062	0.0468779	0	0.171723	0.00607758	0.0228217	0.0105771	0	0	0.00889857	0.0318916	0.127335	0.0332704	0.0930672	0.0533421	0	0.15594	0	0	0.0159051
TCGA-EJ-7797-01A	0.056715	0	0.112701	0.10146	0	0.251588	0.022148	0.0158462	0	0	0	0.00815463	0.0177748	0.0275129	0.0940928	0.0730961	0.0302372	0	0.188674	0	0	0
TCGA-EJ-8468-01A	0.0679097	0	0.0989367	0.0926384	0	0.278165	0	0.0243948	0	0	0	0.0279664	0.0143691	0.0206111	0.0424433	0.158534	0.0702086	0	0.0919107	0.00258377	0	0.00932794
TCGA-EJ-8469-01A	0.0681759	0	0.0716074	0.0970519	0	0.128842	0	0.0967229	0	0	0	0.0454589	0	0.113488	0.069165	0.111382	0.100745	0	0.0973617	0	0	0
TCGA-EJ-8470-01A	0.0673568	0	0.079989	0.0910497	0	0.294015	0.0137443	0.0414942	0.00342643	0.00512427	0	0.00667759	0	0.12095	0.136958	0.0804113	0.0367234	0	0.0220802	0	0	0
TCGA-EJ-8472-01A	0.0674377	0	0.111834	0.102554	0	0.196352	0	0.0346725	0.00596931	0	0	0.100727	0.0149389	0.0853847	0	0.119601	0	0.0182126	0.142315	0	0	0
TCGA-EJ-8474-01A	0.0209859	0	0.0621958	0.012908	0	0.276994	0	0.00263441	0.0278748	0.0147526	0	0.0608329	0	0.174847	0.054938	0.141221	0.00647472	0	0.143341	0	0	0
TCGA-EJ-A46B-01A	0.0624915	0	0.283801	0.0972184	0	0.190741	0	0.00502466	0.00132802	0	0	0.0337365	0	0.02244	0.0396646	0.112144	0.00241836	0.00295564	0.146037	0	0	0
TCGA-EJ-A46D-01A	0.0691694	0	0.264136	0.0302356	0	0.256708	0	0	0	0	0	0.0580736	0.0175326	0.0281116	0.0189906	0.0616598	0.0245109	0	0.170872	0	0	0
TCGA-EJ-A46E-01A	0.0391867	0	0.0517994	0.164547	0	0.248474	0	0.087189	0	0	0.0171957	0.0038061	0.0245186	0	0.0357441	0.0913053	0.0936976	0.00260831	0	0.114268	0.0256605	0
TCGA-EJ-A46F-01A	0.0340815	0	0.0490468	0.109714	0	0.222284	0	0.0446354	0.0306753	0	0	0.0891701	0.0100015	0.0934511	0.0535037	0.113505	0	0	0.149932	0	0	0
TCGA-EJ-A46G-01A	0.0555529	0	0.238066	0.0680714	0	0.163615	0	0.022916	0.0302185	0	0	0.0629082	0.0115886	0.0144152	0.137378	0.0803112	0.0310051	0	0.083954	0	0	0
TCGA-EJ-A46H-01A	0.000222585	0	0.286548	0.0830063	0	0.380022	0	0.0254877	0	0	0	0.0698051	0.0177245	0	0.00902395	0.0415674	0.000466663	0.0342643	0.0518611	0	0	0
TCGA-EJ-A46I-01A	0.0666064	0	0.125378	0.128364	0	0.33108	0	0.00970428	0.0450488	0	0.00752401	0	0.0104335	0	0.0671241	0.0613062	0.0755095	0	0.0719211	0	0	0
TCGA-EJ-A65B-01A	0.0184344	0	0.255961	0.0402557	0	0.0675126	0	0.013582	0.0124474	0	0	0.0503842	0	0.313534	0.00744173	0.114997	0	0	0.10545	0	0	0
TCGA-EJ-A65D-01A	0.0290402	0	0.544165	0.0303149	0	0.027991	0	0.0258549	0.0258275	0	0	0.060956	0.00909827	0.0885705	0.0410501	0.0233214	0	0	0.0938104	0	0	0
TCGA-EJ-A65E-01A	0.0162195	0	0.175892	0.0624812	0	0.171353	0	0.0102232	0.000424035	0.0638074	0	0.035272	0.000339147	0.105475	0.0631367	0.108589	0	0	0.186616	0	0.000172143	0
TCGA-EJ-A65F-01A	0.060991	0	0.0691408	0.148008	0	0.156874	0	0.0266502	0.0110261	0.0342162	0	0.0599719	0.00337304	0.0575116	0.0434025	0.111933	0.0677168	0	0.136698	0.0124867	0	0
TCGA-EJ-A65G-01A	0.133448	0	0.297827	0.0457139	0	0.12689	0	0.026346	0	0	0	0.046472	0.00788905	0.0340138	0.0333246	0.0619845	0.00621485	0	0.179876	0	0	0
TCGA-EJ-A65J-01A	0.0586385	0	0.265308	0	0	0.191915	0	0.0206957	0.00292432	0	0	0.060934	0.00831385	0	0.0831976	0.217977	0.0123106	0	0.0777847	0	0	0
TCGA-EJ-A65M-01A	0.0108526	0	0.136001	0.108083	0	0.146282	0	0.0366334	0.00701178	0.0277798	0	0.0325501	0	0.102535	0.0630584	0.169763	0.030273	0	0.129176	0	0	0
TCGA-EJ-A6RA-01A	0.000296771	0	0.167979	0.0300331	0	0.23701	0	0	0.0166698	0	0	0.0535621	0.0232577	0.0957216	0.0986919	0.0728391	0.0134969	0	0.190442	0	0	0
TCGA-EJ-A6RC-01A	0.106835	0	0.12098	0.0290441	0	0.322746	0	0.0124832	0.0376745	0.00908208	0	0.0470172	0.0307483	0.0430107	0.0571939	0.0742732	0	0	0.108912	0	0	0
TCGA-EJ-A7NF-01A	0	0	0.19627	0.085266	0	0.195267	0	0.0333123	0	0	0	0.0408885	0	0.262755	0.062924	0.052585	0.00951234	0	0.0612193	0	0	0
TCGA-EJ-A7NG-01A	0.067206	0	0.195142	0.0713282	0	0.226794	0	0.0588517	0	0	0	0.0545105	0.0260608	0.0531206	0.0393927	0.0498361	0.0389597	0	0.118799	0	0	0
TCGA-EJ-A7NH-01A	0.0587804	0	0.160333	0.189945	0	0.242897	0	0.0260943	0	0	0.00218796	0.00230413	0.0109877	0	0.0611095	0.111939	0.0241091	0	0.109313	0	0	0
TCGA-EJ-A7NJ-01A	0	0	0.232465	0.176694	0	0.180568	0	0.0689948	0.0267766	0	0	0.031007	0.00134095	0.0529747	0.12797	0.041237	0.0101694	0	0.0498015	0	0	0
TCGA-EJ-A7NK-01A	0.0980535	0	0.239698	0.0324347	0	0.144841	0	0.0248977	0.0415996	0	0	0.080442	0.00687452	0.0573103	0.0777709	0.0478767	0.0217094	0	0.126492	0	0	0
TCGA-EJ-A7NM-01A	0.0548884	0.0292658	0.0271513	0.156229	0	0.185545	0	0.0426396	0.132315	0	0	0.0471136	0.0121759	0.0640724	0.0534173	0.0711542	0.0563805	0	0.0676515	0	0	0
TCGA-EJ-A7NN-01A	0.122681	0	0.280342	0.0466243	0	0.118938	0	0.0398189	0.016398	0	0	0.0362635	0.00114116	0	0.0457537	0.0734261	0.0309441	0.0021169	0.185532	0	0	2.07602e-05
TCGA-EJ-A8FN-01A	0.0763778	0	0.0362257	0.100709	0	0.215691	0	0.0617779	0.0151315	0	0	0.0575809	0.0213794	0.19264	0.0579177	0.0706791	0.00634216	0	0.087549	0	0	0
TCGA-EJ-A8FO-01A	0.0216185	0	0.357662	0	0	0.116723	0	0.000975948	0.00374399	0.00780459	0	0.0393537	0	0.145423	0.0520615	0.0894651	0	0	0.165168	0	0	0
TCGA-EJ-A8FP-01A	0.00382871	0	0.183794	0.0658011	0	0.231602	0	0	0	0	0	0.0802241	0.0207081	0.0704427	0.0564301	0.0719381	0.0150121	0	0.200219	0	0	0
TCGA-EJ-A8FS-01A	0.0454203	0	0.0671095	0.128385	0	0.120556	0.0647781	0.007647	0	0	0	0.0380487	0.00151458	0.196412	0.0475813	0.117944	0.00873074	0	0.155874	0	0	0
TCGA-EJ-A8FU-01A	0.0283848	0	0.0713244	0.0298867	0	0.412015	0	0.0052201	0	0	0	0.0489036	0.0278397	0.0236694	0.100806	0.0513331	0.021034	0	0.179583	0	0	0
TCGA-EJ-AB20-01A	0.0330594	0	0.0151231	0.195683	0	0.239529	0	0.110302	0	0.0312534	0	0.160989	0.0165592	0	0.0307518	0.0683525	0.023685	0.0110933	0.0423849	0.0212338	0	0
TCGA-EJ-AB27-01A	0.069312	0.0183607	0.12459	0.0670464	0	0.205748	0	0.12524	0.0257037	0	0	0.0488501	0.00098575	0.0765988	0.0750598	0.0134304	0.00339874	0.0107138	0.134962	0	0	0
TCGA-FC-7708-01A	0.00428605	0	0.0819308	0.0948251	0	0.235892	0	0	0.0043548	0	0	0.0930515	0.0313087	0.12124	0.0782648	0	0.0531673	0	0.201679	0	0	0
TCGA-FC-7961-01A	0.0663991	0	0.0644247	0.0506985	0	0.315425	0	0	0.0167039	0	0	0.00930049	0.00590649	0	0.0461193	0.220935	0.0301139	0	0.173974	0	0	0
TCGA-FC-A4JI-01A	0.0449349	0	0.0476246	0.275568	0	0.0524731	0.0854003	0.0717834	0.022062	0	0.0849096	0	0.00498559	0.0762121	0.0260568	0.0795008	0	0.0740161	0.0512335	0	0	0.00323896
TCGA-FC-A5OB-01A	0.0292019	0	0	0.016859	0	0.298535	0	0.00475745	0	0	0	0.0216633	0.0150069	0	0.0319053	0.388805	0.0132714	0	0.179995	0	0	0
TCGA-FC-A66V-01A	0.00373032	0	0.297437	0.00413273	0	0.226306	0	0.0096775	0	0	0	0.0198835	0.00877497	0.166379	0.0372882	0.0435101	0.019542	0	0.163339	0	0	0
TCGA-FC-A6HD-01A	0.0411902	0	0.177526	0.0851143	0	0.2217	0	0.00796227	0.010949	0.0329272	0	0.0668761	0.010549	0.0359667	0.0141342	0.0931845	0.00663469	0	0.195287	0	0	0
TCGA-FC-A8O0-01A	0.0377262	0	0.06384	0.029021	0	0.136604	0	0.0707535	0.00455504	0	0	0.0826745	0.0069443	0	0.0457674	0.121666	0.00449226	0.00189617	0.394059	0	0	0
TCGA-G9-6329-01A	0.0113069	0	0.0578588	0.124001	0	0.220936	0	0.0287518	0.00745883	0	0	0.085529	0.0157134	0.0779214	0.115608	0.00635417	0.0167547	0	0.231805	0	0	0
TCGA-G9-6332-01A	0.0498639	0	0.0715967	0.163775	0	0.146906	0.00313684	0.00272904	0	0	0	0.0143067	0	0.197928	0.0994086	0.0492444	0.0791128	0	0.121992	0	0	0
TCGA-G9-6333-01A	0.0973532	0	0.0616714	0.0933029	0	0.283337	0	0.0406797	0	0	0	0.0769968	0.00582484	0	0.16074	0.0710142	0.0239168	0	0.0411683	0.0400182	0.00397624	0
TCGA-G9-6336-01A	0.0319531	0	0.340862	0.028976	0	0.180528	0	0.0477373	0	0	0	0.0180368	0.00512151	0.0604376	0.0602234	0.100892	0.0627784	0	0.0624543	0	0	0
TCGA-G9-6338-01A	0.0983541	0	0.157709	0.0867075	0	0.191035	0.013557	0.00990053	0.00706206	0	0	0.022727	0.00219461	0.0969384	0.0507508	0.114886	0.00126734	0	0.146911	0	0	0
TCGA-G9-6339-01A	0.0816182	0	0.121258	0.120185	0	0.204719	0.0102435	0.018061	0.0391338	0	0	0.052941	0.0121482	0.0433144	0.178968	0	0.0344961	0	0.0829142	0	0	0
TCGA-G9-6342-01A	0.0683144	0	0.199758	0.0238063	0	0.171942	0	0.0252688	0.0247973	0	0	0.0591192	0	0.161116	0.0795832	0.0249004	0.105346	0	0.0560485	0	0	0
TCGA-G9-6343-01A	0	0	0.34386	0.0214878	0	0.167581	0	0	0.00132137	0	0	0.025934	0.00781712	0.0915147	0.0523411	0.131494	0.00486204	0	0.151787	0	0	0
TCGA-G9-6347-01A	0.054224	0	0.086581	0.230889	0	0.202252	0	0.0215682	0.0629498	0	0	0.0436075	0.0144197	0.0491625	0.0245441	0.11307	0	0.00891567	0.0878169	0	0	0
TCGA-G9-6348-01A	0.051482	0	0.0709191	0.130962	0	0.344842	0.00356272	0.00442608	0	0	0	0.0390042	0.00472082	0.012019	0.120026	0.0867821	0.0408096	0	0.0904443	0	0	0
TCGA-G9-6351-01A	0.00860669	0	0.333931	0.0140889	0	0.233588	0	0	0	0.0229187	0	0.0434742	0	0.105737	0.0476526	0	0.00354695	0	0.186456	0	0	0
TCGA-G9-6353-01A	0.0653323	0	0.372977	0.128957	0	0.115421	0	0.0126179	0.00947416	0	0	0.0198129	0.00792823	0	0.0162416	0.0787409	0.0208525	0.00577599	0.145868	0	0	0
TCGA-G9-6354-01A	0.020078	0	0.268714	0.084293	0	0.191929	0.0110324	0.0274166	0	0	0	0.0257079	0	0.130843	0.11246	0.0561659	0.0137557	0	0.0576055	0	0	0
TCGA-G9-6356-01A	0.0215948	0	0.0887868	0.148086	0	0.224212	0	0.0205849	0.0422535	0	0	0.0390434	0.00463475	0.0296088	0.132245	0.0975495	0.0301228	0	0.121277	0	0	0
TCGA-G9-6361-01A	0.0820562	0	0.058142	0.0484544	0	0.313294	0	0	0.0118323	0.0255976	0	0.06964	0	0.0819641	0.0544468	0.0813616	0.0304846	0	0.142726	0	0	0
TCGA-G9-6362-01A	0.0542202	0	0.126722	0.0478004	0	0.24528	0.00570144	0.000401214	0	0.0447371	0	0.0560592	0	0.0120741	0.175964	0.0949152	0.0340235	0	0.102102	0	0	0
TCGA-G9-6363-01A	0.0083718	0	0.12955	0.0270051	0	0.364684	0	0.00364282	0	0.0426889	0	0.0340259	0	0.102222	0.0818252	0.0326432	0.00368399	0	0.169657	0	0	0
TCGA-G9-6364-01A	0.0623025	0	0.151145	0.0689862	0	0.225948	0.00159444	0.00636723	0.000642196	0	0	0.00210336	0	0.188519	0.0963725	0.0767079	0.0340478	0	0.0852643	0	0	0
TCGA-G9-6365-01A	0.00881135	0	0.0068581	0.0758365	0	0.399051	0	0.0529319	0	0	0	0.0640312	0.00715699	0.0408583	0.11391	0.051858	0.0571302	0	0.121566	0	0	0
TCGA-G9-6366-01A	0.0281099	0	0.332581	0.0635288	0	0.131156	0	0.00380219	0.00134849	0	0	0.0640334	0.0202566	0.0599233	0.128635	0	0.0103501	0	0.152558	0	0.00371803	0
TCGA-G9-6367-01A	0.0022842	0	0.147615	0.0138051	0	0.396043	0	0	0.00272152	0	0	0.0939558	0.0185726	0.0601915	0.0332267	0.0195906	0.0168757	0	0.195118	0	0	0
TCGA-G9-6369-01A	0.0790358	0	0.0848693	0.14054	0	0.252754	0	0.0157447	0	0	0	0.0336453	0.00244218	0	0.0559324	0.265731	0	0	0.0693051	0	0	0
TCGA-G9-6370-01A	0.076344	0	0.0805183	0.151502	0	0.246613	0.0141138	0	0	0	0	0.0109429	0.00254001	0	0.0512124	0.0981243	0.113301	0	0.148718	0.0060715	0	0
TCGA-G9-6371-01A	0.0371849	0	0.197489	0.145337	0	0.178812	0	0.0135872	0.0166802	0	0	0.023655	0	0.0772178	0.105108	0.0666897	0.0141321	0	0.124107	0	0	0
TCGA-G9-6373-01A	0.0119803	0.00330842	0.0747997	0.127211	0	0.288564	0	0.0581192	0.064169	0.00607658	0	0.0294533	0	0.0350792	0.107497	0.105221	0.0217379	0	0.0667825	0	0	0
TCGA-G9-6377-01A	0.0807498	0	0.066872	0.1751	0	0.207723	0.0273293	0.0175108	0.0462906	0	0	0.00869494	0	0.117074	0.067362	0.0774466	0.0083491	0.0175227	0.0819753	0	0	0
TCGA-G9-6378-01A	0.0692309	0	0.119127	0.0456892	0	0.269882	0	0.0640274	0	0.0242639	0	0.0380436	0.00162212	0	0.0863258	0.0731341	0.0366536	0	0.172	0	0	0
TCGA-G9-6379-01A	0.0173802	0	0.066088	0.204888	0	0.0593801	0	0.0706778	0.0956133	0.033334	0	0.0604756	0.000606908	0.077195	0.0577377	0.10376	0.0406983	0	0.112165	0	0	0
TCGA-G9-6384-01A	0.0810294	0	0.102161	0.031328	0	0.331358	0	0.039497	0.00432594	0	0	0.0262425	0.00173105	0.0510425	0.140005	0.0254745	0.0493686	0	0.116437	0	0	0
TCGA-G9-6385-01A	0.0453953	0	0.133677	0.0128722	0	0.239555	0	0.0504429	0	0	0	0.0414433	0.0191919	0.0714452	0.0661571	0.0766281	0.0481486	0	0.195044	0	0	0
TCGA-G9-6494-01A	0.089741	0	0.225798	0.0654815	0	0.205113	0	0.0484015	0	0	0	0.0432784	0.00205803	0	0.0653183	0.0969335	0.0568306	0	0.101046	0	0	0
TCGA-G9-6496-01A	0.00814045	0	0.358136	0.0620371	0	0.136986	0	0.00619921	0.000479063	0	0	0.0494293	0.0200039	0.0240671	0.0783427	0.105433	0.0106966	0	0.140049	0	0	0
TCGA-G9-6498-01A	0.055969	0	0.0981085	0.169893	0	0.233189	0.0191317	0.00622018	0.148319	0	0	0.0395	0	0.0459892	0.0293307	0.0615077	0	0.0342468	0.0585953	0	0	0
TCGA-G9-6499-01A	0.0501348	0	0.147518	0.0884203	0	0.181454	0	0.010684	0.0112228	0	0	0.0801729	0.0240992	0.111246	0.0448055	0.0730937	0.00259217	0	0.174557	0	0	0
TCGA-G9-7509-01A	0.0991951	0	0.337203	0.103283	0	0.166567	0	0.0214883	0	0	0	0.0320143	0.003329	0	0.0359501	0.0415598	0.0368907	0	0.122519	0	0	0
TCGA-G9-7510-01A	0.0723721	0	0.125332	0.051424	0	0.226757	0	0.0426464	0.00895821	0	0	0.0181343	0	0.151217	0.0770663	0.118508	0.0319266	0	0.0596896	0.0159687	0	0
TCGA-G9-7519-01A	0.0835981	0	0.254145	0.111518	0	0.116652	0	0.0132188	0	0	0	0.0376378	0.00125136	0.00131743	0.021995	0.189436	0.00748667	0	0.161744	0	0	0
TCGA-G9-7521-01A	0.0411039	0	0	0.0590936	0	0.487316	0.0290804	0	0.0103031	0.00962589	0	0	0.0171146	0.0222584	0.177688	0.0281145	0.0029204	0	0.115216	0	0.000164946	0
TCGA-G9-7522-01A	0.00710573	0	0.1569	0.0395657	0	0.123	0	0.014164	0.00199979	0.0170764	0	0.0771293	0.0206552	0.139237	0.111363	0.0833772	0.0530265	0	0.155401	0	0	0
TCGA-G9-7523-01A	0.0239833	0	0.00828079	0.0278839	0	0.312724	0	0.0259416	0.0468523	0.0607508	0	0.0469144	0	0.0529934	0.0455423	0.1647	0.0199734	0	0.163459	0	0	0
TCGA-G9-7525-01A	0.088605	0	0.142242	0.0794534	0	0.151492	0	0.000992275	0.0419607	0	0	0.0789613	0.00843854	0.0112987	0.0238245	0.217913	0.0214652	0	0.133353	0	0	0
TCGA-G9-A9S0-01A	0	0	0.0486657	0.165198	0	0.224695	0.00050395	0.0356737	0.0623962	0	0	0.0813642	0	0.06546	0.0616628	0.0956005	0.0828445	0	0.0759345	0	0	0
TCGA-G9-A9S7-01A	0.00730345	0	0.0858794	0.0801507	0	0.247311	0	0.0604509	0.00482313	0	0	0.0428079	0.0104388	0.135669	0.10112	0.00728594	0.0209941	0	0.194468	0	0.0012965	0
TCGA-H9-7775-01A	0.0902131	0	0.0216728	0.0566052	0	0.16091	0	0.0407093	0	0	0	0.0346082	0.00283098	0.157439	0.0360086	0.110049	0.0508384	0	0.238115	0	0	0
TCGA-H9-A6BX-01A	0.0156379	0	0.0435259	0.00722835	0	0.221392	0	0.0214197	0.0366057	0.00839956	0	0.0382021	0	0.28921	0.0572789	0.0957706	0	0	0.165329	0	0	0
TCGA-H9-A6BY-01A	0.00813617	0	0.330497	0.0370439	0	0.182872	0	0.0015052	0.000147758	0.0251567	0	0.0939299	0.00422602	0.0648593	0.0173353	0.0229391	0.00495228	0	0.206399	0	0	0
TCGA-HC-7075-01A	0.0586307	0.0062305	0.100588	0.0520795	0	0.224442	0	0.0397143	0.0324532	0	0	0.0386919	0.00306726	0.181158	0.0764501	0.0307366	0.0151946	0.0130057	0.127558	0	0	0
TCGA-HC-7077-01A	0.0687048	0	0.271832	0.117365	0	0.0918935	0.00806591	0.0507439	0.0204307	0	0	0.0191191	0	0.171364	0.0463466	0.046689	0.0187759	0	0.0686693	0	0	0
TCGA-HC-7078-01A	0.0442492	0	0.145482	0.0423477	0	0.182764	0.0015987	0.0335117	0	0.0026968	0	0.0545116	0.0126219	0.0514329	0.0622573	0.179746	0.0234623	0	0.163318	0	0	0
TCGA-HC-7079-01A	0.0523925	0.0485638	0.0953665	0.0732163	0	0.179698	0.0160662	0.0892178	0.060301	0	0	0.000224284	0	0.205153	0.082613	0.0930719	0	0	0.00411566	0	0	0
TCGA-HC-7080-01A	0.0365419	0	0.197962	0.0537511	0	0.0687532	0	0.00551218	0.0281451	0	0	0.0699918	0.00645253	0.00150614	0.0535125	0.120714	0.02207	0	0.335087	0	0	0
TCGA-HC-7081-01A	0.00476444	0	0.0185916	0.0632089	0	0.281753	0.0318653	0	0	0	0	0.0316061	0.0224855	0.0361441	0.0670754	0.214542	0.108383	0	0.119581	0	0	0
TCGA-HC-7209-01A	0.103362	0	0.0775902	0.143634	0	0.109213	0.0136421	0.0264443	0.0194204	0	0	0.0398372	0.0106763	0.0267685	0.124039	0.0820328	0.106935	0.00521215	0.111194	0	0	0
TCGA-HC-7210-01A	0.103394	0	0.153488	0.0559975	0	0.23263	0	0.0403153	0	0.0013564	0	0.0625786	0.0249212	0.0212124	0.099544	0.111092	0.0353523	0	0	0.0581189	0	0
TCGA-HC-7211-01A	0	0	0.265336	0.0174066	0	0.127977	0.0542461	0.0118249	0	0	0	0.00861377	0.0994584	0.12336	0.0273496	0.0764606	0.0218463	0.0309953	0.0621341	0.0551363	0	0.0178553
TCGA-HC-7212-01A	0.0295826	0	0.126795	0.0595706	0	0.251677	0	0.0016419	0	0	0	0.0248907	0.0155619	0.00751575	0.0822308	0.102528	0.106954	0	0.185755	0	0	0.00529741
TCGA-HC-7213-01A	0.0668935	0	0.0657523	0.0179698	0	0.249852	0	0.0477328	0.0232894	0	0	0.0424695	0.0316761	0.0571421	0.0534663	0.117041	0.0867917	0.0228504	0.114205	0	0	0.0028676
TCGA-HC-7230-01A	0.0581414	0	0.049149	0.100214	0	0.114261	0	0.0112425	0	0	0	0.0475712	0	0.16523	0.100834	0.112967	0.032606	0	0.207784	0	0	0
TCGA-HC-7231-01A	0.0449159	0	0.0913903	0.164168	0	0.269599	0.020624	0	0.00624903	0	0	0.026425	0	0.108031	0.0896983	0.0773996	0.0233377	0	0.0781626	0	0	0
TCGA-HC-7232-01A	0.0618256	0	0.135928	0.0651807	0	0.222144	0	0	0	0	0	0.0672324	0.00382197	0.0364821	0.096833	0.115572	0.0340349	0	0.160945	0	0	0
TCGA-HC-7233-01A	0.00513878	0	0.0512056	0.0737542	0	0.297266	0	0.0193528	0	0	0	0.0823021	0.0357254	0.0546726	0.163724	0.0977975	0.0418481	0	0.0772123	0	0	0
TCGA-HC-7736-01A	0.029507	0	0.129038	0.0804554	0	0.246491	0	0	0	0	0	0.0578717	0.00816787	0.165853	0.082722	0.0919501	0.00958333	0	0.0852668	0	0.0130945	0
TCGA-HC-7737-01A	0.0538951	0	0.103575	0.13203	0	0.351078	0	0	0	0	0	0.0353693	0.00835598	0.016523	0.0514557	0.129717	0.0551545	0.0188026	0.026859	0.0171843	0	0
TCGA-HC-7738-01A	0.0984647	0	0.183323	0.00109319	0	0.146153	0	0.0101154	0	0.0203608	0	0.0192876	0	0.23101	0.0613986	0.11502	0	0	0.113775	0	0	0
TCGA-HC-7740-01A	0.0809244	0	0.089936	0.122065	0	0.320609	0	0.0212976	0.00457886	0	0	0.0182019	0.0163938	0	0.0318785	0.142252	0	0.0370174	0.0930646	0.000284975	0	0.0214967
TCGA-HC-7742-01A	0.0879965	0	0.192116	0.0150379	0	0.182279	0	0	0	0.0083917	0	0.0570455	0.0114604	0.0626453	0.0970787	0.0977737	0.035573	0	0.152602	0	0	0
TCGA-HC-7744-01A	0	0	0.275171	0.0588641	0	0.125405	0	0.0129076	0.0107853	0	0	0.0502736	0	0.0809655	0.0211942	0.120944	0.0761399	0.00288694	0.164463	0	0	0
TCGA-HC-7745-01A	0.0118089	0	0.0778946	0.0580757	0	0.315065	0	0.00982173	0	0	0	0.0670725	0.0341434	0.052889	0.126302	0.0548198	0.0417149	0	0.135419	0	0.0149732	0
TCGA-HC-7747-01A	0.0434505	0	0.0517732	0.145229	0	0.172604	0.010817	0.0695661	0.0258056	0	0	0.0472803	0.0108452	0.0140482	0.157152	0.0937485	0.0553188	0	0.102362	0	0	0
TCGA-HC-7748-01A	0.0783864	0	0.0984825	0.088644	0	0.27028	0.00818248	0.0241837	0.00451094	0	0	0.0135221	0.0183607	0.0458944	0.110205	0.0784851	0.0533979	0	0.0948044	0	0	0.0126597
TCGA-HC-7749-01A	0.0397361	0	0.0655583	0.0738501	0	0.247542	0	0.010758	0.0233681	0	0	0.0395694	0.00925474	0.062767	0.0713882	0.16073	0.013783	0	0.181695	0	0	0
TCGA-HC-7750-01A	0.0522093	0	0.132331	0.0310684	0	0.221904	0	0.0321397	0.0051819	0	0	0.0667565	0.013511	0.0651139	0.0178155	0.0883052	0.0112379	0	0.262425	0	0	0
TCGA-HC-7752-01A	0.0634644	0	0.337928	0.014666	0	0.131369	0	0.0237305	0.00160591	0.000733472	0.0168969	0	0	0.165262	0.0381858	0.0889698	0.00955293	0	0.107635	0	0	0
TCGA-HC-7818-01A	0.102165	0	0.117113	0.00520675	0	0.212942	0	0.0207831	0	0	0	0.0106232	0.136678	0.0778912	0.102251	0.0909205	0.0462084	0	0.0762581	0	0	0.000960457
TCGA-HC-7819-01A	0.0967105	0	0.415829	0.0399643	0	0.181253	0	0.02187	0.000544904	0	0.000654785	0.0257342	0.0269923	0.0471706	0.0503458	0.00290342	0	0	0.0875995	0	0.00242696	0
TCGA-HC-7820-01A	0.0273265	0	0.171205	0.054626	0	0.153875	0	0	0	0.0396779	0	0.0823052	0.00991521	0.142031	0.118974	0	0.00855246	0	0.181805	0	0.00970601	0
TCGA-HC-7821-01A	0.0812045	0	0.0769689	0.0655763	0	0.259016	0	0.0291844	0.0318671	0	0	0.0296791	0.148393	0	0.102714	0.125	0.0106079	0	0.0397891	0	0	0
TCGA-HC-8213-01A	0.0679816	0	0.384137	0.0516729	0	0.106094	0.00750961	0.0197578	0	0	0	0.0120442	0	0.185318	0.0455308	0.0486857	0.0200494	0	0.051218	0	0	0
TCGA-HC-8216-01A	0	0	0.149931	0.137682	0	0.0897991	0.0168474	0.0238767	0.0161359	0.0282294	0	0.0231819	0	0.157548	0.0841413	0.143735	0.0401082	0	0.088783	0	0	0
TCGA-HC-8256-01A	0.0366331	0	0.225636	0.0649512	0	0.203934	0	0.0263787	0	0.029805	0	0.0333516	0.000278946	0.038836	0.117075	0.0794336	0.0138335	0	0.129853	0	0	0
TCGA-HC-8257-01A	0	0	0.197108	0.172336	0	0.216891	0	0.0404457	0.0389267	0	0	0.03469	0.00691966	0	0.0818838	0.090532	0.0408364	0	0.0794303	0	0	0
TCGA-HC-8258-01A	0.0471665	0	0.200086	0.10497	0	0.27698	0.037571	0.0753575	0	0	0	0.00396187	0.00109857	0	0.0755116	0.0912798	0.0231084	0.00155759	0.0563157	0	0	0.00503593
TCGA-HC-8259-01A	0.0821872	0	0.340528	0	0	0.165895	0	0	0	0	0.0123493	0.0302585	0	0.0599872	0.0658973	0.0763902	0.00333968	0	0.163167	0	0	0
TCGA-HC-8260-01A	0.0221556	0	0.136027	0.0909128	0	0.272275	0.00668689	0.0124364	0	0.0273077	0	0.0018419	0	0	0.112891	0.105487	0.128209	0	0.08377	0	0	0
TCGA-HC-8261-01A	0.0153983	0	0.117384	0.156998	0	0.126939	0.0250181	0.015995	0.0199659	0	0.00164551	0	0.00279134	0.0588387	0.132851	0.166991	0.072416	0	0.0867685	0	0	0
TCGA-HC-8262-01A	0.0462162	0	0.348504	0.123872	0	0.143174	0.0210186	0.0100918	0.00341934	0	0	0.00326267	0.0110587	0	0.0925333	0.0791307	0.0466656	0	0.0710538	0	0	0
TCGA-HC-8265-01A	0.0301562	0	0.24701	0.107281	0	0.133104	0.020833	0.0267316	0.0244524	0	0	0.0240703	0.0138307	0.0371109	0.0798063	0.088617	0.034109	0	0.132888	0	0	0
TCGA-HC-8266-01A	0.0102321	0	0.020976	0.186876	0	0.425972	0	0.0146098	0.0324835	0.020041	0	0	0.0148366	0.0200027	0.14408	0.0657854	0.0223609	0	0.0217443	0	0	0
TCGA-HC-A48F-01A	0.0581939	0	0.388182	0.0301236	0	0.0868407	0	0	0.0125157	0	0	0.0473427	2.90687e-05	0.0708503	0.0231319	0.14806	0.003431	0	0.131299	0	0	0
TCGA-HC-A4ZV-01A	0.0924401	0	0.0964708	0.103418	0	0.21557	0.0085981	0.00030602	0.0221945	0.0212645	0	0.00373631	0	0.185849	0.0592402	0.107105	0.0343877	0	0.0494197	0	0	0
TCGA-HC-A631-01A	0.0371823	0	0.0532254	0.112257	0	0.236361	0.0633807	0.0192701	0	0	0	0.0354462	0.0112899	0.00426245	0.159381	0.142121	0.0173355	0	0.108487	0	0	0
TCGA-HC-A632-01A	0.120488	0.0298219	0.0316595	0.0517546	0	0.285639	0	0.0140708	0.0878297	0.0401842	0	0.0382765	0	0.0447895	0.0496048	0.0907186	0.0231186	0.00188225	0.0885019	0	0	0.00166099
TCGA-HC-A6AL-01A	0.009908	0	0.0484598	0.108079	0	0.0778223	0	0.061522	0.0857562	0	0	0.0295273	0.00657557	0.187094	0.0192294	0.194829	0.0433638	0.000455621	0.127378	0	0	0
TCGA-HC-A6AN-01A	0	0	0.140846	0.0552384	0	0.120521	0	0.0361484	0	0	0	0.0522803	0	0.330956	0.0154578	0.152072	0.00139348	0	0.0950862	0	0	0
TCGA-HC-A6AO-01A	0.0041259	0	0.114982	0.109185	0	0.124281	0	0.008164	0.0155956	0	0	0.0174183	0.149938	0.0491139	0.0730112	0.0874919	0.0433279	0	0.198619	0	0	0.00474761
TCGA-HC-A6AP-01A	0	0	0.183783	0.063582	0	0.0807139	0	0.00389901	0.0263465	0	0	0.0353989	0	0.332472	0.0370749	0.105058	0.00782323	0	0.123849	0	0	0
TCGA-HC-A6AQ-01A	0.0315953	0	0.273051	0.120685	0	0.112725	0	0.0160577	0.0269344	0	0	0.0686774	0.00951861	0.0361483	0.0196325	0.0752341	0.0274654	0	0.182276	0	0	0
TCGA-HC-A6AS-01A	0.00496354	0	0.0926233	0.0702373	0	0.125691	0.00838088	0.030249	0.0492346	0	0	0.0221704	0.0264702	0.268182	0.0590623	0.138566	0.0124609	0	0.0917088	0	0	0
TCGA-HC-A6HX-01A	0.0384424	0	0.235858	0.149065	0	0.193534	0	0.0434204	0.0268763	0	0	0.0664153	0.0119412	0.0522203	0.0204982	0.105522	0.00334142	0.0122072	0.0406589	0	0	0
TCGA-HC-A6HY-01A	0	0	0.245468	0.257209	0	0.0858554	0	0.0220745	0	0	0	0.0344663	0.0154113	0.00446296	0.047456	0.075758	0.0318072	0	0.180032	0	0	0
TCGA-HC-A76W-01A	0.0494687	0	0.0136303	0.0557829	0	0.211737	0	0.00484074	0.0249198	0.0284053	0	0.0466913	0.00252629	0.138223	0.045439	0.201653	0.0248163	0.00430544	0.147561	0	0	0
TCGA-HC-A76X-01A	0.00616683	0	0.299211	0.00265124	0	0.226193	0	0.0522007	0	0	0	0.0613312	0.0325138	0.109477	0	0.0247909	0	0	0.185465	0	0	0
TCGA-HC-A8CY-01A	0.0350676	0.00303164	0.0508994	0.126361	0	0.234988	0	0.0980235	0.0342697	0.024152	0	0.0727027	0	0.1049	0.0761891	0.0600243	0.0218362	0	0.0575556	0	0	0
TCGA-HC-A8D0-01A	0.0856235	0	0.0911142	0.0919063	0	0.193551	0	0.00641826	0.0504724	0	0	0.0757691	0.00716754	0.0854877	0.0303763	0.0945655	0.0427419	0	0.144806	0	0	0
TCGA-HC-A8D1-01A	0.088428	0	0.079122	0.124355	0	0.234142	0.000565533	0.0824367	0.00654228	0	0	0.0323288	0.000876301	0	0.147878	0.073208	0.0468992	0	0.083217	0	0	0
TCGA-HC-A9TE-01A	0.0351594	0	0.118348	0.0864318	0	0.271253	0	0.04197	0.0582645	0	0	0.0380415	0.00697091	0.0513973	0.0634422	0.0880064	0.0442864	0.0352327	0.0611958	0	0	0
TCGA-HC-A9TH-01A	0.0227049	0	0.0804752	0.0311897	0	0.233347	0	0.0331698	0.0309149	0.00188923	0	0.0497217	0	0.11765	0.160012	0.113055	0.0378752	0	0.0879952	0	0	0
TCGA-HI-7168-01A	0.106876	0	0.0284557	0.0271366	0	0.316357	0.0127506	0	0	0	0	0.0308885	0.00919264	0	0.096612	0.218059	0.0473243	0.00178261	0.104565	0	0	0
TCGA-HI-7169-01A	0.088048	0	0.0902308	0.075805	0	0.152519	0	0.00929578	0.0105608	0	0	0.0903823	0.0264805	0.0947583	0.0479142	0.0368373	0	0	0.277168	0	0	0
TCGA-HI-7170-01A	0.0176114	0	0.0760324	0.119371	0	0.288657	0	0.00899118	0.0318019	0.00969667	0	0.0268703	0.000373869	0.0407756	0.0647555	0.120451	0.0331756	0	0.161436	0	0	0
TCGA-HI-7171-01A	0.0313425	0	0.138839	0.202098	0	0.29391	0.0186985	0.0122331	0	0	0	0.00127916	0.0065658	0.0790608	0.0613881	0.0754383	0.00551372	0	0.0736325	0	0	0
TCGA-J4-8198-01A	0.065528	0	0.127762	0.0330923	0	0.387483	0	0	0	0	0	0.0445036	0.0116876	0.0341707	0.0572175	0.0635725	0.0160985	0	0.158885	0	0	0
TCGA-J4-8200-01A	0.0896793	0	0.148977	0.0153212	0	0.186725	0	0	0	0.0245921	0	0.0344131	0	0.153638	0.0694241	0.138817	0.0156698	0	0.122743	0	0	0
TCGA-J4-A67K-01A	0.00710843	0	0.174761	0.16018	0	0.110789	0	0.111979	0.0473181	0.0393285	0	0.0688685	0.0108142	0.0067995	0.0617094	0.0647266	0.100682	0	0.0303442	0	0	0.00459004
TCGA-J4-A67L-01A	0.0025142	0	0.0246275	0.253395	0	0.102075	0	0.0443374	0.0398713	0	0	0.0759141	0.00417119	0.0234325	0.0655612	0.140979	0.100321	0.0151669	0.107633	0	0	0
TCGA-J4-A67M-01A	0.00516925	0	0.0557201	0.133404	0	0.329346	0.0423574	0	0.034777	0	0.00115732	0.0109851	0.0490114	0.0656844	0.0130383	0.114588	0.00422814	0.0089063	0.131628	0	0	0
TCGA-J4-A67N-01A	0.040653	0	0.195017	0.0521039	0	0.0213843	0	0.0133373	0.025804	0.0198673	0	0.0310957	0	0.45686	0.041694	0.0687636	0.00845883	0	0.0249613	0	0	0
TCGA-J4-A67O-01A	0.0582242	0	0.432932	0.087015	0	0.110142	0	0.0109434	0	0	0	0.0448344	0.0139566	0	0.0347139	0.104967	0	0.0252921	0.076394	0	0	0.000585273
TCGA-J4-A67Q-01A	0.0468409	0	0.0951947	0.115729	0	0.248846	0	0.0669947	0.0153551	0	0	0.0413087	0.0113889	0.0661304	0.016708	0.0983477	0.031495	0.00383187	0.14183	0	0	0
TCGA-J4-A67R-01A	0.101585	0	0.105651	0.10096	0	0.219933	0	0.110369	0.00266293	0	0	0.0668096	0.00660697	0.0566064	0.025736	0.0857545	0.0466411	0.0023287	0.068354	0	0	0
TCGA-J4-A67S-01A	0	0	0.202548	0.178471	0	0.194189	0	0.058629	0.0302943	0	0	0.0772555	0.00232717	0.0413005	0.0433919	0.0699922	0.0201029	0.00789947	0.0735983	0	0	0
TCGA-J4-A67T-01A	0.0863417	0	0.139505	0.143632	0	0.138123	0	0.0275856	0.0147519	0	0.00945165	0	0.056076	0.145526	0.0975735	0.0510392	0.0128681	0.0173541	0.0565183	0	0	0.0036547
TCGA-J4-A6G1-01A	0.161369	0.0563409	0.0867293	0.0994756	0	0.226927	0.0144157	0.0456762	0.0720456	0.00366767	0	0.00776596	0	0.11422	0.0243245	0.0507422	0	0	0.0363	0	0	0
TCGA-J4-A6G3-01A	0.0228542	0	0.0503653	0.115432	0	0.299136	0.00259849	0.0392804	0.0310829	0	0	0.0406349	0.00776298	0.0373924	0.10327	0.0868212	0.070413	0	0.0929565	0	0	0
TCGA-J4-A6M7-01A	0.0393219	0	0.027998	0.0863858	0	0.165637	0	0.0630647	0	0.0234989	0	0.055542	0	0.162822	0.0473365	0.105227	0.00108013	0	0.222086	0	0	0
TCGA-J4-A83I-01A	0.0939933	0	0.300407	0.0735594	0	0.1658	0	0.00969342	0.00365692	0	0	0.0323797	0	0.077239	0.183239	0.0113621	0.00911377	0	0.0272488	0	0.0123077	0
TCGA-J4-A83J-01A	0.0457019	0	0.0886088	0.0931642	0	0.221342	0	0.0921616	0.0129597	0	0	0.0968237	0.00407491	0.0381988	0.0756894	0.140037	0.0129379	0	0.0782999	0	0	0
TCGA-J4-A83K-01A	0.0935914	0	0.117911	0.0380992	0	0.211924	0	0.0173384	0.0388633	0	0	0.0510599	0.0142064	0.167584	0.0304502	0.0774685	0.0348371	0	0.106666	0	0	0
TCGA-J4-A83L-01A	0.0894982	0	0.179627	0.0171199	0	0.146633	0	0.0592222	0	0	0	0.039374	0.00990867	0.0764166	0.0562944	0.0718477	0	0	0.170078	0.0584737	0	0.0255069
TCGA-J4-A83M-01A	0.0546745	0	0.028848	0.155303	0	0.282769	0	0.0495741	0.0285675	0	0	0.0339726	0.0126918	0.110445	0.0555482	0.0610017	0.0475503	0.00057163	0.0784821	0	0	0
TCGA-J4-A83N-01A	0.0581206	0	0.221074	0.083902	0	0.173011	0	0.0737985	0.0128097	0	0	0.0451834	0.00022436	0.13952	0.0356914	0.0543916	0.0589993	0.00566828	1.93853e-05	0.0370873	0	0.000500112
TCGA-J4-AATV-01A	0.0396489	0	0.125754	0.0393513	0	0.137412	0.0162674	0.0717065	0.0676652	0	0	0.0547861	0.0462469	0.041377	0.0325164	0.117323	0.0492036	0.0303112	0.126821	0	0	0.00360965
TCGA-J4-AATZ-01A	0.0149322	0	0.156092	0.0249005	0	0.283948	0	0.0170927	0	0	0	0.0406264	0	0.111223	0.157029	0.108701	0.00186567	0	0.0835896	0	0	0
TCGA-J4-AAU2-01A	0.0297578	0	0.128106	0.127439	0	0.138667	0	0.139635	0.00531569	0	0	0.0889435	0.0158428	0.100504	0.0863663	0.00903243	0.0102377	0	0.113751	0	0.00640136	0
TCGA-J9-A52B-01A	0.0491531	0	0.0747181	0.190017	0	0.114891	0	0.0550872	0.0106593	0.00117467	0	0.0274062	0.00628677	0.0668682	0.128361	0.140938	0.0313818	0	0.103057	0	0	0
TCGA-J9-A52C-01A	0.0549266	0	0.0410335	0.156785	0	0.153096	0	0.0300163	0.000969847	0.0350458	0	0.0337994	0	0.123805	0.0822582	0.147743	0.0527094	0	0.0568329	0.0309796	0	0
TCGA-J9-A52D-01A	0.0984346	0	0.146789	0.0347737	0	0.131079	0.00013921	0.0338931	0.00548258	0	0.0244329	0	0	0.237669	0.0476148	0.120957	0	0	0.118736	0	0	0
TCGA-J9-A52E-01A	0.0201678	0	0.101845	0.0890214	0	0.178047	0	0.0395698	0.0807453	0	0	0.00777029	0	0.19762	0.0670147	0.155218	0.00469972	0	0.0582807	0	0	0
TCGA-J9-A8CK-01A	0.032069	0	0.14875	0.0980963	0	0.148026	0	0.00478036	0.0373813	0	0	0.0688184	0.0417099	0	0.028741	0.221534	0	0.0210409	0.149053	0	0	0
TCGA-J9-A8CL-01A	0.07296	0	0.014561	0.0761643	0	0.231255	0	0.0398747	0.0584875	0	0	0.0452659	0.0369526	0.037082	0.102746	0.138358	0.00797097	0.0011481	0.137174	0	0	0
TCGA-J9-A8CM-01A	0.0379958	0	0.0383818	0.0763231	0	0.192336	0	0	0.0162553	0	0	0.013551	0	0.226729	0.0441813	0.193634	0.00980925	0	0.150803	0	0	0
TCGA-J9-A8CN-01A	0.0608342	0	0.218245	0.0931781	0	0.195796	0.00917066	0.00717703	0	0	0	0.0686774	0.0548919	0	0.0284465	0.0683722	0.00446848	0.00125249	0.116887	0.020096	0.0355241	0.0169835
TCGA-J9-A8CP-01A	0.0274049	0	0.200151	0.0359874	0	0.0843509	0	0.00897575	0.011637	0	0	0.0587084	0	0	0.0257894	0.0332433	0.0033712	0.00574402	0.504636	0	0	0
TCGA-KC-A4BL-01A	0.0799669	0	0.115616	0.122505	0	0.261855	0	0.0223345	0.0153693	0	0	0.0185402	0	0.0376926	0.0660129	0.0555667	0.0720066	0	0.132535	0	0	0
TCGA-KC-A4BN-01A	0.0950353	0	0.266872	0.164646	0	0.129357	0.0353905	0.0402943	0	0	0	0.0214884	0.0107848	0.019058	0.0825151	0.0401694	0.0284473	0	0.0659422	0	0	0
TCGA-KC-A4BR-01A	0.0543083	0	0.134838	0.0488423	0	0.252286	0	0.0103618	0.0241273	0	0	0.0686838	0.0672036	0.0161934	0.0522298	0.0447811	0.00716542	0	0.169752	0.0330153	0	0.0162111
TCGA-KC-A4BV-01A	0.00231108	0	0.0869256	0.176496	0	0.172794	0	0	0.00387155	0	0	0.1041	0.0271128	0.0248552	0.122936	0.0394483	0.0474659	0	0.189968	0	0.00171449	0
TCGA-KC-A7F3-01A	0.0353806	0	0.256471	0.145607	0	0.17792	0.0297326	0.0303937	0.00600202	0	0	0.0234105	0.0157285	0.00846983	0.032372	0.115714	0.0405022	0.0063544	0.0753959	0.000545347	0	0
TCGA-KC-A7F5-01A	0.0398651	0	0.180015	0	0	0.281855	0	0.0455404	0.00278715	0	0	0.0440075	0.0422632	0.113594	0.0398956	0.00448839	0	0.00853669	0.184336	0	0.0128153	0
TCGA-KC-A7F6-01A	0.0840248	0	0.112782	0.101371	0	0.208594	0	0.0399597	0.0294468	0	0	0.0574065	0.0109979	0.0851455	0.0466926	0.0768077	0.0288302	0	0.117942	0	0	0
TCGA-KC-A7FA-01A	0.00492442	0	0.147877	0.0745064	0	0.173424	0	0	0	0	0	0.0643585	0.018807	0.118467	0.118897	0.11189	0.0110467	0	0.155802	0	0	0
TCGA-KC-A7FD-01A	0.051075	0	0.160928	0.0723872	0	0.243133	0	0.0172194	0.0594508	0	0	0.031537	0.0575672	0.114402	0.0592509	0.0660429	0.0067108	0.00231471	0.0577276	0.000253985	0	0
TCGA-KC-A7FE-01A	0.0582502	0	0.0765889	0.0236688	0	0.302159	0	0.0188581	0.00316571	0.00966428	0	0.044755	0.0104783	0.0827747	0.0402846	0.0928094	0.00814072	0	0.228402	0	0	0
TCGA-KK-A59V-01A	0.0389796	0	0.0529422	0.196323	0	0.0773112	0.0549196	0.0761817	0.0852394	0.0923823	0	0.0610148	0	0.0762578	0.0810235	0.0488148	0.00500584	0	0.0536047	0	0	0
TCGA-KK-A59X-01A	0.0631392	0	0.0386459	0.0317373	0	0.24639	0	0.0117142	0.047953	0	0	0.0198379	0	0.0777046	0.0645889	0.207876	0.0262775	0	0.162299	0	0	0.00183659
TCGA-KK-A59Y-01A	0.0682138	0	0.273847	0.0731621	0	0.145251	0	0.0409641	0.0469905	0	0	0.0410975	0	0.109318	0.0507586	0.0505893	0.0265261	0	0.0732812	0	0	0
TCGA-KK-A59Z-01A	0.0695246	0	0.0719678	0.0718162	0	0.185559	0	0.0141353	0.0239214	0	0	0.0402429	0.00289281	0.153358	0.0518318	0.0971708	0.0882739	0	0.0759837	0.0533213	0	0
TCGA-KK-A5A1-01A	0.0820233	0	0.0348958	0.06482	0	0.203258	0	0.0397012	0.00774823	0.0296217	0	0.0259113	0.0297728	0	0.0896466	0.233643	0.0689332	0	0.0900247	0	0	0
TCGA-KK-A6DY-01A	0.0664667	0	0.114106	0.0549753	0	0.188049	0	0.0319283	0.0272566	0	0	0	0	0.308229	0.12008	0.0203532	0.0240443	0	0	0.044511	0	0
TCGA-KK-A6E0-01A	0.000576084	0	0.159124	0.0596304	0	0.231759	0	0	0	0	0	0.0608832	0.0202807	0.0212102	0.102809	0.0913144	0.00644555	0	0.245968	0	0	0
TCGA-KK-A6E1-01A	0.057309	0	0.134986	0.00991753	0	0.322203	0.0077995	0.0175723	0	0	0	0.0528615	0.00706401	0.0329908	0.139329	0.0819387	0.0445589	0.0125598	0.0789098	0	0	0
TCGA-KK-A6E2-01A	0.102095	0	0.0403517	0.0893646	0	0.234332	0	0.0722666	0.0332858	0.0151629	0	0.0875149	0	0.103787	0.0702861	0.0404946	0.0241173	0	0.0869416	0	0	0
TCGA-KK-A6E3-01A	0	0	0.224546	0.0599352	0	0.236261	0	0.073035	0	0.0167811	0	0.0507737	0.0016933	0.0435725	0.0474853	0.0598814	0.0195567	0	0.16453	0	0	0.00194928
TCGA-KK-A6E4-01A	0.0221538	0	0.262208	0.0765968	0	0.123413	0	0.0854905	0.000233315	0.0296029	0	0.0834244	0.00392218	0.0283308	0.0727083	0.0541775	0.0184956	0.013092	0.125203	0	0	0.000947777
TCGA-KK-A6E5-01A	0.013128	0	0.417811	0.0101974	0	0.134354	0.00233715	0	0.00329879	0	0	0.0252506	0.00202847	0.0763655	0.0873854	0.0664305	0.0354681	0	0.125945	0	0	0
TCGA-KK-A6E6-01A	0.0689509	0	0.0937575	0.110052	0	0.247742	0	0.0563572	0.000442551	0.0314494	0	0.0317406	0	0	0.109398	0.076075	0.0431945	0	0.125428	0.00416628	0	0.00124598
TCGA-KK-A6E7-01A	0.0363353	0	0.132068	0.0421193	0	0.172569	0	0.00215589	0	0	0	0.0940444	0	0.0984029	0.0384827	0.239871	0.0161638	0	0.127788	0	0	0
TCGA-KK-A6E8-01A	0.0540767	0	0.357388	0.142533	0	0.0166139	0	0.0670752	0	0.00857131	0	0.0750967	0	0.0261246	0.0271514	0.152428	0	0	0.0729412	0	0	0
TCGA-KK-A7AP-01A	0.0561932	0	0.203846	0.161844	0	0.0495294	0	0.0313268	0.0389162	0	0	0.0406338	0.00349832	0.0377248	0.0617767	0.205624	0.0126525	0	0.0964343	0	0	0
TCGA-KK-A7AQ-01A	0.0609541	0	0.135098	0.0952769	0	0.17064	0.00334068	0.0307615	0.0905583	0	0	0.0346275	0.00635659	0.0393964	0.0746926	0.0940948	0.0617584	0	0.102444	0	0	0
TCGA-KK-A7AU-01A	0	0	0.0805941	0.298436	0	0.0663731	0.0436573	0.0766315	0.0209695	0	0	0.0518366	0.00837439	0	0.0801192	0.155619	0.016999	0.0018089	0.0985819	0	0	0
TCGA-KK-A7AV-01A	0.0108717	0.0328585	0.164959	0.124467	0	0.147705	0.0162451	0.0567591	0.0388548	0	0	0.0318026	0	0.0352843	0.101807	0.0780512	0.0197053	0	0.140629	0	0	0
TCGA-KK-A7AW-01A	0	0.00834376	0.181735	0.0871239	0	0.107776	0	0.0459333	0.0709361	0	0	0.0646442	0.0183106	0.10204	0.0905796	0.0835419	0.0354241	0	0.103612	0	0	0
TCGA-KK-A7AY-01A	0.0246104	0	0.14248	0.0620809	0	0.183922	0	0.032137	0.00665435	0	0	0.0484654	0.0174136	0.0675083	0.170172	0.0873558	0.0197996	0	0.1374	0	0	0
TCGA-KK-A7AZ-01A	0.0787925	0	0.314965	0.118524	0	0.157965	0	0.0186678	0.0199335	0	0	0.0379164	0.000279061	0.00864185	0.0329848	0.0834967	0.0234718	0	0.104361	0	0	0
TCGA-KK-A7B0-01A	0.0205414	0	0.129143	0.0734874	0	0.255591	0	0.0253119	0.0659144	0	0	0.0220075	0	0.179236	0.0251586	0.126159	0.00568454	0	0.0717648	0	0	0
TCGA-KK-A7B1-01A	0.0137559	0	0.111278	0.138805	0	0.226073	0	0.00522405	0	0	0	0.0474058	0.0216274	0.00343302	0.0382088	0.177409	0.0402768	0.000906309	0.175597	0	0	0
TCGA-KK-A7B2-01A	0	0.00499595	0.0946301	0.158578	0	0.173937	0	0.0210501	0.0658647	0.00750297	0	0.0420587	0.00769164	0.0760432	0.0905316	0.118794	0.0795666	0	0.0587545	0	0	0
TCGA-KK-A7B3-01A	0.00491382	0	0.0999709	0.0345483	0	0.203641	0	0	0.0111751	0	0	0.0788218	0.00705874	0.295577	0.078938	0.0954457	0.0127523	0	0.0771571	0	0	0
TCGA-KK-A7B4-01A	0.0193936	0	0.106898	0.0685223	0	0.289125	0	0	0.0213301	0	0	0.0501045	0.019723	0.0623007	0.143237	0.0602334	0.0193149	0	0.134816	0	0.00500088	0
TCGA-KK-A8I4-01A	0.0522463	0	0.056449	0.156282	0	0.218657	0	0	0.0502324	0	0	0.0569485	0.00948652	0.0729818	0.0849472	0.0743126	0.0363772	0	0.13108	0	0	0
TCGA-KK-A8I5-01A	0.0647207	0	0.200274	0.0472896	0	0.168503	0	0	0.000384409	0	0	0.0270068	0	0.211063	0.0326516	0.0953681	0.0375285	0	0.11521	0	0	0
TCGA-KK-A8I6-01A	0.0678049	0	0.115798	0.0342384	0	0.199919	0	0.0192495	0	0.0173345	0	0.0391864	0	0.081363	0.10666	0.106095	0.0372323	0	0.175119	0	0	0
TCGA-KK-A8I7-01A	0.0592298	0	0.153348	0.0661419	0	0.217626	0	0.0357118	0.00457888	0	0	0.0264108	0.0317585	0.0303914	0.0679742	0.158141	0.0824629	0	0.0662255	0	0	0
TCGA-KK-A8I8-01A	0.00577885	0	0.0804061	0.085859	0	0.308349	0	0	0	0	0	0.0108501	0.0282185	0.0704365	0.176973	0.0257938	0.0604473	0	0.146888	0	0	0
TCGA-KK-A8I9-01A	0.0491305	0	0.0723607	0.059271	0	0.270861	0	0.0022631	0.0223879	0	0	0.0496184	0.0476482	0.0192299	0.0624486	0.0801745	0.0704868	0.0344737	0.156895	0	0	0.00275091
TCGA-KK-A8IA-01A	0.0355058	0	0.0280791	0.0545451	0	0.144845	0	0.0792352	0.0120862	0	0	0.0355141	0	0.147905	0.202856	0.108953	0	0	0.150475	0	0	0
TCGA-KK-A8IB-01A	0.0119818	0.00163469	0.0400949	0.0337841	0	0.354475	0	0	0.0161927	0	0	0.05914	0.0607287	0.158004	0.0542671	0.093662	0.0163801	0	0.0996548	0	0	0
TCGA-KK-A8IC-01A	0.0737975	0	0.086617	0.0748731	0	0.310642	0.00671716	0	0.0150862	0	0	0.0169498	0.0134785	0	0.053831	0.182568	0.056164	0.0159563	0.0933192	0	0	0
TCGA-KK-A8ID-01A	0.0552093	0	0.116071	0.110593	0	0.217978	0	0.12164	0	0	0	0.0531684	0	0.0317714	0.148176	0.0938447	0.0351392	0	0.0164082	0	0	0
TCGA-KK-A8IF-01A	0.0707777	0	0.192806	0.0342724	0	0.153888	0	0.0455921	0.0630369	0	0	0.0961258	0.0148132	0.0449594	0.0511469	0.0960246	0.0152883	0	0.121269	0	0	0
TCGA-KK-A8IG-01A	0.0731952	0	0.168485	0.115898	0	0.217953	0	0.00958963	0	0	0	0.0359287	0.0127666	0.0229877	0.0605042	0.117165	0.0165489	0	0.14631	0	0.00266829	0
TCGA-KK-A8IH-01A	0.0963215	0	0.0615392	0.0688773	0	0.261435	0	0.0311224	0.0646341	0	0	0.0742284	0.0121105	0.0704143	0.0819111	0.0748297	0	0.0178243	0.0847525	0	0	0
TCGA-KK-A8II-01A	0	0	0.157938	0.0255038	0	0.328952	0	0	0.00215942	0	0	0.0505425	0	0.300587	0.0646035	0	0	0	0.0637661	0	0.00594676	0
TCGA-KK-A8IJ-01A	0.0654153	0	0.151962	0.0266497	0	0.131552	0	0.00747525	0.0007064	0.013315	0	0.0716323	0	0.0923535	0.0218771	0.127406	0.0259434	0.0121983	0.243595	0.0079181	0	0
TCGA-KK-A8IK-01A	0.116244	0	0.152167	0.0105023	0	0.0620225	0	0	0.0210149	0.0034581	0	0.0420216	0.0308354	0.0517573	0	0.198326	0	0.0117091	0.299942	0	0	0
TCGA-KK-A8IL-01A	0.00611311	0	0.100038	0.134165	0	0.225017	0	0.0306199	0.0149595	0	0	0.0700261	0.0428921	0.0429775	0.150546	0.0870375	0.0174564	0	0.0781527	0	0	0
TCGA-KK-A8IM-01A	0.0536529	0	0.0779019	0.0547234	0	0.34175	0	0.0374868	0.0713864	0.01425	0	0.020386	0.0114347	0.0276921	0.105358	0.117244	0.025413	0	0.0413208	0	0	0
TCGA-M7-A71Y-01A	0.0476994	0	0.0813313	0.0835885	0	0.219279	0	0.036249	0.00961007	0	0	0.053678	0.00734544	0.130523	0.0619847	0.0671366	0.0458285	0	0.155747	0	0	0
TCGA-M7-A71Z-01A	0	0	0.299593	0.0499296	0	0.185224	0	0.00837626	0	0.0110871	0	0.0825162	0.00117173	0.029441	0.0237337	0.118221	0.0424934	0	0.148212	0	0	0
TCGA-M7-A720-01A	0.136701	0	0.152326	0.0304412	0	0.19114	0	0.0507439	0	0	0	0.0445665	0.00967533	0.123101	0.0431886	0.0925469	0	0.00829434	0.117275	0	0	0
TCGA-M7-A721-01A	0.0804455	0	0.291484	0.0448936	0	0.1259	0	0.0125557	0.00785692	0	0	0.0478816	0.00569512	0.0819134	0.0529682	0.129588	0.00703907	0	0.111779	0	0	0
TCGA-M7-A722-01A	0.0342076	0	0.272236	0.0303255	0	0.100128	0	0.0152625	0.0195499	0	0	0.049531	0.0330699	0	0.0137515	0.259586	0.0138868	0	0.158465	0	0	0
TCGA-M7-A723-01A	0.0559641	0	0.131899	0.153219	0	0.19466	0	0.0048828	0.000795021	0.000467757	0	0.0275796	0.00331534	0	0.167284	0.134168	0.0390961	0	0.0866703	0	0	0
TCGA-M7-A724-01A	0.015777	0	0.166081	0.00848287	0	0.171644	0	0.0177351	0	0	0	0.103744	0	0.101211	0.01907	0.19424	0	0	0.14126	0.0607539	0	0
TCGA-M7-A725-01A	0.0508096	0	0.151722	0	0	0.286967	0	0.00662986	0.00200671	0.00740296	0	0.0377235	0.00503408	0.141036	0.148478	0.0552213	0	0	0.106969	0	0	0
TCGA-MG-AAMC-01A	0.0399292	0	0.369017	0.105574	0	0.122946	0	0.0256781	0	0.00353804	0	0.0220705	0	0.109319	0.11032	0.0522398	0.0235444	0	0.0158241	0	0	0
TCGA-QU-A6IL-01A	0.00504228	0	0.295415	0.0785789	0	0.0907153	0.000490993	0.0630171	0.0157321	0.0186358	0	0	0.0128815	0.207273	0.0489573	0.0985582	0.0167201	0	0.0262335	0.0217482	0	0
TCGA-QU-A6IM-01A	0	0	0.173399	0.299171	0	0.109265	0	0.0384128	0.0840253	0	0	0.0953724	0.0259271	0.00577783	0.0444361	0.0534191	0.0327706	0.00360467	0.0344191	0	0	0
TCGA-QU-A6IN-01A	0.00536338	0	0.217479	0.161683	0	0.209411	0	0.0207292	0.0428569	0	0	0.0696413	0	0.145487	0.0065725	0.0612403	0.0017078	0	0.0578287	0	0	0
TCGA-QU-A6IO-01A	0.00741838	0	0.162621	0.197731	0	0.161467	0	0.0560773	0.036461	0	0	0.0773882	0.00797288	0.0211672	0.0535383	0.128479	0.00752646	0	0.0821536	0	0	0
TCGA-QU-A6IP-01A	0.0835882	0	0.207246	0.12641	0	0.172583	0.00636977	0.0402668	0.0237633	0	0	0.0247359	0.0105758	0.136817	0.0210018	0.0450724	0.0355773	0	0.0659938	0	0	0
TCGA-SU-A7E7-01A	0.0593361	0	0.114828	0.126343	0	0.274565	0.0180222	0.0554566	0	0.00121942	0	0.00579687	0.00860657	0	0.155613	0.0890931	0.0184154	0	0	0.0727045	0	0
TCGA-TK-A8OK-01A	0.0813518	0	0.051278	0	0	0.284767	0	0	0.0248587	0.00316194	0	0.064854	0.0129388	0.00798583	0.0419445	0.169577	0.0597312	0	0.197551	0	0	0
TCGA-TP-A8TT-01A	0.0040941	0	0.0406562	0.110989	0	0.386497	0	0	0	0	0	0.0199964	0.0256952	0.0886645	0.163274	0.0431534	0.0217409	0	0.0952386	0	0	0
TCGA-TP-A8TV-01A	0	0	0.113753	0.05778	0	0.283163	0	0.0109172	0.0170971	0	0	0.0906659	0.0152907	0.0518811	0.0613618	0.180044	0.00164918	0	0.116398	0	0	0
TCGA-V1-A8MF-01A	0.0438323	0	0.0585108	0.128593	0	0.196914	0.0086043	0.0183314	0.00169373	0.0026914	0	0.018562	0.00192085	0.0110692	0.069369	0.0806203	0.100513	0	0.258775	0	0	0
TCGA-V1-A8MG-01A	0.0516456	0	0.177841	0.0507137	0	0.300528	0	0.0324351	0.0109005	0	0	0.0689569	0.0208431	0.0541478	0.0744439	0.0304356	0	0	0.127108	0	0	0
TCGA-V1-A8MK-01A	0.00203148	0	0.253264	0.0266702	0	0.227537	0	0.00670262	0	0	0	0.047388	0.015149	0.115411	0.113444	0	0.00973314	0	0.176835	0	0.00583523	0
TCGA-V1-A8ML-01A	0	0	0.331195	0.077327	0	0.190938	0	0.00691304	0.00541132	0.00288083	0	0.0289471	0.00285482	0.0466091	0.0259367	0.0873311	0	0.00446408	0.189193	0	0	0
TCGA-V1-A8MM-01A	0.035565	0	0.105771	0.161829	0	0.115171	0.0616739	0.0366046	0.0403972	0	0	0.0194132	0.0244984	0	0.0917291	0.210239	0.0108952	0	0.0862135	0	0	0
TCGA-V1-A8MU-01A	0.00510255	0	0.184516	0.111905	0	0.153232	0.00622322	0	0.0220327	0.0474006	0	0.0458565	0.00381206	0.0966085	0.0668099	0.0532697	0.0357066	0	0.167525	0	0	0
TCGA-V1-A8WL-01A	0.0747178	0	0.281905	0.0338902	0	0.149271	0.00973455	0.0129409	0.019345	0.0668629	0	0.0239741	0.00337595	0.0743004	0.0834837	0.0231835	0.00842349	0	0.134592	0	0	0
TCGA-V1-A8WN-01A	0.0200424	0	0.255692	0.0374235	0	0.274779	0	0.00598694	0	0	0	0.0694827	0.013573	0.0613054	0.068203	0	0.000344869	0.0125517	0.180616	0	0	0
TCGA-V1-A8WS-01A	0.0711508	0	0.0664196	0.1424	0	0.286041	0	0.0244399	0.0134671	0	0	0.0450543	0.00289676	0	0.0737852	0.14168	0.0232686	0	0.109397	0	0	0
TCGA-V1-A8WV-01A	0.0888264	0	0.0253715	0.142518	0	0.300071	0	0.0228662	0.0339946	0	0	0.0504233	0.00632064	0.0225843	0.0682715	0.0375762	0.089188	0	0.111989	0	0	0
TCGA-V1-A8WW-01A	0.0493903	0	0.0357057	0.0743121	0	0.18987	0	0.0566514	0	0	0	0.0907274	0	0.157082	0.117867	0.0676653	0.0470119	0	0.113717	0	0	0
TCGA-V1-A8X3-01A	0.0764384	0	0.309642	0.0840073	0	0.14861	0	0.00286181	0.00355701	0	0	0.0809129	0.0149498	0.0688522	0.0412895	0.055917	0	0	0.112963	0	0	0
TCGA-V1-A9O5-01A	0.0362571	0	0	0.0472426	0	0.311931	0	0	0.0398556	0	0.00278553	0.0015541	0.0252147	0.0470818	0.202305	0.152886	0.0191029	0	0.113784	0	0	0
TCGA-V1-A9O7-01A	0.0965763	0	0.0730143	0.121686	0	0.20258	0.00313689	0.0282107	0.00842601	0	0	0.0437742	0.022815	0.0648708	0.0568049	0.110606	0.0391096	0.0139508	0.0772489	0.0371897	0	0
TCGA-V1-A9O9-01A	0.0179111	0	0.185485	0.151919	0	0.313214	0.0124095	0	0.0141198	0	0	0	0	0.0697605	0.134763	0.0494825	0.00808483	0	0.0417858	0	0	0.00106447
TCGA-V1-A9OA-01A	0.0409247	0	0.0454176	0.160688	0	0.292636	0	0.0291754	0	0	0	0.0180063	0.0382305	0	0.0860013	0.18153	0.0572848	0	0.0501047	0	0	0
TCGA-V1-A9OF-01A	0.0577322	0	0.19159	0.0597769	0	0.217981	0	0	0	0	0	0.0369262	0.00991676	0.00457904	0.0672545	0.178325	0.0262182	0	0.1497	0	0	0
TCGA-V1-A9OH-01A	0.0658823	0	0.153567	0.120742	0	0.207991	0	0.0272894	0	0.00267221	0	0.01436	0	0	0.0807662	0.15645	0.0688687	0	0.10141	0	0	0
TCGA-V1-A9OL-01A	0.00756735	0	0.0149974	0.122035	0	0.233213	0	0	0.0226241	0.0268053	0	0.0555267	0.00897381	0.126002	0.119282	0.0741544	0.0567403	0	0.132079	0	0	0
TCGA-V1-A9OQ-01A	0.0435342	0	0.309979	0.147871	0	0.130286	0.00485067	0.0606996	0.0152606	0.00468616	0	0.042245	0.00119469	0.037895	0.0289775	0.0582645	0.00202869	0	0.112228	0	0	0
TCGA-V1-A9OT-01A	0.0572105	0	0.0935408	0.247351	0	0.161635	0	0.0224379	0.0688465	0	0	0.107079	0.0130977	0.0280085	0.0129914	0.0574394	0.0114684	0	0.118893	0	0	0
TCGA-V1-A9OX-01A	0.0369793	0	0.181462	0.108814	0	0.202723	0.00120857	0.0432319	0.0239447	0	0	0.0403991	0	0.132622	0.0301085	0.0917878	0.0189835	0.000310735	0.087425	0	0	0
TCGA-V1-A9OY-01A	0.0528051	0	0.158915	0.0976992	0	0.260708	0	0	0.0196984	0	0	0.0580763	0.00260862	0.104429	0.0688769	0.0585942	0.0214071	0	0.0961826	0	0	0
TCGA-V1-A9Z7-01A	0.069443	0	0.0184117	0.0841249	0	0.221205	0	0.0109228	0.00826353	0.00199369	0	0.0339492	0.00843528	0	0.0673446	0.281276	0.0485775	0.00321842	0.142835	0	0	0
TCGA-V1-A9Z8-01A	0.00290314	0	0.107036	0.0222226	0	0.298529	0	0	0.000375387	0	0	0.0864588	0.00949014	0.0513214	0.0428265	0.091313	0.0187918	0	0.268732	0	0	0
TCGA-V1-A9Z9-01A	0.0321855	0	0.0904448	0.0163896	0	0.212082	0	0.00107101	0.0383016	0	0	0.0703725	0.000497935	0.0997893	0.0858952	0.207702	0.000902071	0	0.144366	0	0	0
TCGA-V1-A9ZG-01A	0.0446784	0	0.0477602	0.0897892	0	0.186729	0	0	0.0366252	0	0	0.0670928	0.0509922	0	0.0593091	0.216693	0.0182487	0	0.182081	0	0	0
TCGA-V1-A9ZI-01A	0.0652428	0	0.0314888	0.0825807	0	0.157831	0.00809835	0.00529797	0.0235967	0	0.00750019	0.00217645	0	0.207872	0.0484128	0.281084	0.0137023	0	0.0651153	0	0	0
TCGA-V1-A9ZK-01A	0.0822613	0	0.197579	0.0591144	0	0.187797	0	0	0.043892	0	0	0.0755859	0.00926338	0.00765089	0.0533514	0.109084	0.0467875	0	0.127633	0	0	0
TCGA-V1-A9ZR-01A	0.00581345	0	0.0198806	0.0779515	0	0.231674	0	0.0195602	0.0351537	0	0	0.0594291	0.0221802	0.13323	0.0687955	0.187123	0.0110096	0	0.128199	0	0	0
TCGA-VN-A88I-01A	0.0446015	0.00463166	0.0197488	0.144319	0	0.256407	0	0	0.0487439	0	0	0.0911914	0.00100054	0.0130217	0.00512664	0.10751	0.0105519	0.00591043	0.247235	0	0	0
TCGA-VN-A88K-01A	0.0182022	0	0.201255	0.0529057	0	0.291295	0	0	0	0	0	0.0719415	0.00620275	0.0711711	0.00742858	0.00898627	0	0.00296147	0.267651	0	0	0
TCGA-VN-A88L-01A	0.0796364	0	0.0461494	0.0641437	0	0.231785	0	0.0451513	0	0	0	0.0545742	0	0.0581346	0.0929525	0.150008	0.0119837	0	0.165481	0	0	0
TCGA-VN-A88M-01A	0.0378776	0	0.431796	0.0283904	0	0.0640725	0	0.014127	0.00556614	0.0512051	0	0.0444017	0.0213931	0.0819772	0.0857952	0	0.00695197	0	0.104536	0	0.0219101	0
TCGA-VN-A88N-01A	0.00169107	0	0.0865231	0.0796196	0	0.255605	0	0.00112144	0.000154713	0	0	0.0715106	0.0194756	0.0887211	0.105763	0.0705196	0.000867247	0	0.215107	0	0.00332101	0
TCGA-VN-A88O-01A	0.00982246	0	0.164521	0.0776602	0	0.197937	0	0.0118473	0.00465937	0	0	0.0806526	0.0156298	0.0728261	0.151874	0.056088	0.00546632	0	0.151017	0	0	0
TCGA-VN-A88P-01A	0.0914298	0	0.102173	0.0744129	0	0.305493	0	0.0269622	0.0100526	0.00898727	0	0.0411811	0.00332534	0.0247408	0.0706733	0.0698131	0.0152674	0	0.155488	0	0	0
TCGA-VN-A88Q-01A	0.039907	0	0.0672751	0.0872241	0	0.168314	0	0.021543	0.0409599	0	0	0.0271455	0	0.27717	0.0647467	0.0855663	0.0255921	0	0.0945566	0	0	0
TCGA-VN-A88R-01A	0.0360968	0	0.227256	0.0410866	0	0.118467	0	0.00347784	0.00568012	0	0	0.0754995	0.0343733	0	0.0301854	0.266347	0.00970437	0	0.151826	0	0	0
TCGA-VN-A943-01A	0.0609722	0	0.349408	0.125325	0	0.132367	0	0.0251789	0	0	0	0.03131	0.00112011	0.0903926	0.0310314	0.0337813	0	0	0.119114	0	0	0
TCGA-VP-A872-01A	0.06982	0	0.199629	0.111482	0	0.205155	0	0	0.0977475	0	0	0.0405422	0.0160305	0.0669503	0.0103976	0.052258	0.0511048	0.0413002	0.0375827	0	0	0
TCGA-VP-A875-01A	0.103309	0	0.238136	0.0391823	0	0.196537	0	0.0779352	0.0361445	0	0	0.0334033	0.0107393	0.0302311	0.0784265	0.06896	0.0325693	0.0065079	0.0479185	0	0	0
TCGA-VP-A876-01A	0.12534	0	0.204804	0.0924683	0	0.147242	0	0.011578	0.00973893	0.00952197	0	0.0685732	0.00936547	0.085969	0.110029	0	0	0	0.117676	0	0.00769335	0
TCGA-VP-A878-01A	0.0269012	0	0.079404	0.0319222	0	0.198926	0	0.0146831	0.0216529	0.0174362	0	0.0695258	0.009063	0.076748	0.0575115	0.124001	0.0415351	0	0.230691	0	0	0
TCGA-VP-A879-01A	0	0	0.420049	0.119635	0	0.111753	0	0.01848	0	0	0	0.0346246	0.0157436	0.000145062	0.0317371	0.0785466	0.0602478	0	0.109038	0	0	0
TCGA-VP-A87B-01A	0	0	0.220122	0.0507004	0	0.172187	0	0.00613481	0.00649006	0	0	0.0733848	0.0264884	0.0714365	0	0.176235	0	0	0.196705	0	0	0.000115906
TCGA-VP-A87C-01A	0.11225	0	0.0233111	0.152636	0	0.196285	0.021682	0.0743316	0.0744382	0.0368068	0	0.00929865	0	0.075644	0.0740934	0.056338	0.0572593	0.00120716	0.0344199	0	0	0
TCGA-VP-A87D-01A	0.0745521	0	0.159048	0.0976038	0	0.234377	0	0.0428172	0.0158009	0	0	0.0338904	0.0109645	0	0.0794729	0.10166	0.0636526	0	0.0861612	0	0	0
TCGA-VP-A87E-01A	0.0679933	0	0.0762724	0.142306	0	0.186631	0.0209136	0.107878	0	0.0123688	0	0.0591502	0.00903191	0.0764498	0.100702	0.0772471	0.0210145	0	0.0383576	0	0	0.0036834
TCGA-VP-A87H-01A	0.0810021	0	0.148113	0.0218151	0	0.241353	0	0.147066	0.00351002	0.00762297	0	0.036897	0.0318148	0.0574582	0.104108	0.0776928	0.0164662	0	0.0250818	0	0	0
TCGA-VP-A87J-01A	0.103755	0	0.214477	0.016523	0	0.207301	0	0.0744708	0	0	0	0.0421129	0.0022725	0.0643645	0.0758193	0.13897	0.00556081	0.00834431	0.0100401	0.0359893	0	0
TCGA-VP-A87K-01A	0	0	0.237756	0.172884	0	0.151496	0	0.044416	0.0247729	0	0	0.0470641	0.0106125	0.0567752	0.0886552	0.0803968	0.0120843	0	0.0730866	0	0	0
TCGA-VP-AA1N-01A	0.0647197	0	0.0369145	0.0815294	0	0.232573	0	0.0368766	0.00955177	0.0344781	0	0.0468887	0	0.103455	0.0666114	0.160875	0.0205852	0	0	0.104941	0	0
TCGA-WW-A8ZI-01A	0.0255925	0	0.137417	0.100506	0	0.211958	0	0.0652417	0	0	0	0.0400206	0	0.0903771	0.0978756	0.105753	0	0	0.125259	0	0	0
TCGA-X4-A8KQ-01A	0.0219355	0	0.176541	0.0630027	0	0.210862	0	0.00832591	0.0475723	0	0	0.090262	0.0148633	0.0540461	0.0648554	0.134164	0.00192327	0	0	0.111647	0	0
TCGA-X4-A8KS-01A	0.00893908	0	0.269494	0.0625898	0	0.185039	0	0.0237432	0.00482934	0	0	0.0892602	0.0160728	0.0595893	0.05302	0.0751044	0.0235417	0	0.128778	0	0	0
TCGA-XA-A8JR-01A	0.0884094	0	0.180811	0.065984	0	0.179451	0	0.0473096	0	0	0	0.0449046	0.00725014	0.0373787	0.0905921	0.122894	0	0.00308749	0.131928	0	0	0
TCGA-XJ-A83F-01A	0.04705	0	0.313147	0.0364634	0	0.0746848	0	0.0031317	0.00405506	0	0	0.0203856	0	0.275334	0.0276165	0.10459	0	0	0.0935424	0	0	0
TCGA-XJ-A83G-01A	0.00378983	0	0.259901	0.111646	0	0.095253	0.0248123	0.0531723	0	0	0	0.0109627	0	0.13862	0.0543694	0.109877	0.015468	0	0.122128	0	0	0
TCGA-XJ-A83H-01A	0.00204477	0	0.413599	0.0679019	0	0.210889	0.00259579	0.0261057	0	0	0	0.078146	0.015022	0.0549167	0.081148	0.00144013	0.00355919	0.0172682	0.00412826	0.0191484	0.00208736	0
TCGA-XJ-A9DI-01A	0.0467919	0	0.00127836	0.216996	0	0.201037	0.0173529	0.0267744	0.0296783	0.0267161	0	0	0	0.110885	0.103353	0.151942	0.0308536	0.00120282	0.0351382	0	0	0
TCGA-XJ-A9DK-01A	0.111826	0	0.139168	0.147298	0	0.133774	0	0.0584988	0	0	0	0.0237931	0.000884231	0.171733	0.0148214	0.100584	0.0310419	0	0.0665771	0	0	0
TCGA-XJ-A9DQ-01A	0	0	0.47487	0.0477246	0	0.200597	0	0	0	0.0086431	0	0.0278892	0	0.0372423	0.0207644	0.00905291	0.0259688	0	0.147248	0	0	0
TCGA-XJ-A9DX-01A	0.0603009	0	0.185804	0.0835763	0	0.154283	0	0.0198364	0.038855	0	0	0.0457457	0.022134	0	0.0791388	0.21856	0.00672468	0	0.0850414	0	0	0
TCGA-XK-AAIR-01A	0.0350524	0	0.0884299	0.0653234	0	0.201212	0	0.012396	0.0446797	0.0107568	0	0.0709941	0.00100299	0.115741	0.0330755	0.0787262	0.0594727	0	0.183137	0	0	0
TCGA-XK-AAIV-01A	0.0366961	0	0.0287844	0.0322392	0	0.310368	0.0306737	0	0.0601106	0	0.0167721	0	0.0268302	0.167066	0.0815512	0.125156	0.0367494	0	0.0470024	0	0	0
TCGA-XK-AAIW-01A	0.0400034	0	0.0363122	0.464228	0	0	0.0919189	0.0766949	0.0280616	0.0365602	0	0	0	0.0084656	0.0646616	0.118368	0.0222447	0	0.0124816	0	0	0
TCGA-XK-AAJA-01A	0.0508087	0	0.250838	0.0693277	0	0.115686	0	0.0273396	0.00393413	0	0	0.0340778	0.00234832	0.110875	0.0570631	0.0495452	0.0101706	0	0.217987	0	0	0
TCGA-XK-AAJP-01A	0.0243104	0	0.0611882	0.0754161	0	0.242807	0	0.019838	0.0543985	0	0	0.0462359	0.153507	0	0.0636784	0.111185	0.0701565	0	0.0772791	0	0	0
TCGA-XK-AAJR-01A	0.0287388	0	0.202732	0.0750185	0	0.105517	0	0.0309308	0	0	0	0.0343696	0.0114998	0	0.0267736	0.185452	0.0819307	0	0.217037	0	0	0
TCGA-XK-AAJT-01A	0.0297663	0	0.138775	0.0297074	0	0.269219	0	0.0108303	0.0116831	0.00319946	0	0.0427336	0.0106321	0.0284552	0.120406	0.150226	0.0329181	0	0.121448	0	0	0
TCGA-XK-AAJU-01A	0.00417241	0	0.153148	0.0561037	0	0.26741	0	0	0.00369649	0	0	0.0550907	0.0102049	0.0962842	0.0458521	0.0509578	0.0530322	0	0.204047	0	0	0
TCGA-XQ-A8TA-01A	0.107884	0	0.177961	0	0	0.131361	0	0.0033262	0	0	0	0.0835466	0.0304051	0.160279	0	0.218569	0	0	0.0866694	0	0	0
TCGA-XQ-A8TB-01A	0.0259936	0	0.122264	0.0426648	0	0.337446	0	0	0	0	0	0.0615951	0.00859472	0.0212221	0.144603	0.157077	0.0445785	0	0.00655419	0.0244629	0.00294366	0
TCGA-Y6-A8TL-01A	0.00237347	0	0.198435	0.0577975	0	0.446868	0	0	0	0	0	0.0251361	0.0121404	0.0948265	0.0429702	0	0.00446943	0	0.113099	0	0.00188507	0
TCGA-Y6-A9XI-01A	0.0430511	0	0.137904	0.0528312	0	0.196291	0	0.0476416	0.0271673	0	0	0.0415627	0.019831	0.0572135	0.0539813	0.158537	0.0138017	0	0.150186	0	0	0
TCGA-YJ-A8SW-01A	0.0119637	0	0.088384	0.0631122	0	0.254072	0	0.019297	0.00200958	0	0	0.0507928	0.0209726	0.0335016	0.090745	0.208413	0.0525495	0	0.101335	0	0.00285122	0
TCGA-YL-A8HJ-01A	0.0509389	0	0.0173221	0.100271	0	0.253665	0	0.0360177	0.0111095	0	0	0.0485593	0.00206096	0.179965	0.064328	0.088194	0.0381827	0	0.109386	0	0	0
TCGA-YL-A8HK-01A	0.0835234	0	0.0777309	0.0852793	0	0.214684	0	0.0520335	0.0021368	0	0	0.0406006	0.0111372	0.1118	0.0740665	0.0954561	0.0355279	0	0.116024	0	0	0
TCGA-YL-A8HL-01A	0.0484358	0	0.392401	0.0277173	0	0.077879	0	0.0327406	0	0	0	0.039204	0	0.046843	0.114493	0.107996	0.0427459	0	0.0695443	0	0	0
TCGA-YL-A8HM-01A	0.0344433	0	0.0223992	0.354057	0	0.11493	0.0179352	0.0406393	0.0672442	0.00525986	0	0.0302022	0.00573493	0.0222476	0.0764803	0.129665	0.0397993	0	0.0389624	0	0	0
TCGA-YL-A8HO-01A	0.0521577	0	0.00323068	0.0775739	0	0.251769	0	0.0293451	0.00152328	0.00995684	0	0.0386568	0.0236489	0	0.0348338	0.325781	0.0729711	0	0.0785525	0	0	0
TCGA-YL-A8S8-01A	0.12491	0	0.145165	0.0713533	0	0.188413	0	0.0501594	0.0128477	0	0	0.0439543	0.0301601	0.0347725	0.0889281	0.138037	0.0349491	0	0	0.0363494	0	0
TCGA-YL-A8S9-01A	0.0275473	0	0.294165	0.0283688	0	0.15501	0	0.00585082	0	0	0	0.0372482	0.0179241	0.044651	0.0265049	0.150389	0.00931269	0.0155774	0.187451	0	0	0
TCGA-YL-A8SA-01A	0.047838	0	0.152104	0.058207	0	0.150123	0	0.0496572	0.0457473	0	0	0.0766278	0	0.0934923	0.122072	0.0661165	0.0341393	0	0.103876	0	0	0
TCGA-YL-A8SB-01A	0.0999992	0	0.153141	0.089593	0	0.161303	0	0.0691674	0.0179066	0	0	0.0316871	0.00750343	0	0.0173933	0.130178	0.0663107	0	0.155817	0	0	0
TCGA-YL-A8SC-01A	0.0433286	0	0.10908	0.0671264	0	0.126678	0.0056681	0	0.0422184	0	0	0.0495484	0.0202532	0.121919	0.1301	0.121996	0.0138132	0	0.14827	0	0	0
TCGA-YL-A8SI-01A	0.0630905	0	0.0885714	0.0680807	0	0.233449	0	0.0602079	0	0	0	0.0139178	0.0392817	0.0682371	0.0493419	0.151008	0	0	0.0868709	0	0	0.0779431
TCGA-YL-A9WH-01A	0.0673253	0	0.0321315	0.0242484	0	0.186559	0	0.0456067	0.0179429	0	0	0.0546667	0.00239845	0.248219	0.0906189	0.0912613	0	0.0400489	0.0989731	0	0	0
TCGA-YL-A9WI-01A	0.0438227	0	0.129003	0.0453909	0	0.212163	0	0.00908102	0.0484534	0	0	0.0527924	0.0143706	0.0455827	0.115216	0.108964	0.0369055	0	0.138256	0	0	0
TCGA-YL-A9WJ-01A	0.0529111	0	0.0116762	0.0643931	0	0.275142	0	0.0492592	0.019485	0	0	0.0282856	0.0258235	0.0745933	0.0612815	0.14939	0.0857063	0	0.0573748	0.0446788	0	0
TCGA-YL-A9WK-01A	0.0961856	0	0.0414685	0.138715	0	0.339611	0	0.020193	0	0	0	0.0408171	0.00218692	0	0.0948813	0.149047	0.0154349	0.00989146	0.0398257	0.0117418	0	0
TCGA-YL-A9WL-01A	0.057008	0	0.148423	0.108223	0	0.166248	0	0.0348768	0.0358191	0	0	0.0557553	0.000257046	0.104779	0.0673556	0.129947	0.0165276	0	0.0747806	0	0	0
TCGA-YL-A9WX-01A	0.0906791	0	0.311386	0.0737297	0	0.192245	0	0.0571548	0.00662179	0	0	0.0538503	0.0174058	0.0582962	0.023709	0.0401697	0.00477803	0	0.0679613	0.00201319	0	0
TCGA-YL-A9WY-01A	0.0184584	0	0.0464549	0.11346	0	0.270721	0.0374134	0.00697307	0.0087446	0.0247989	0	0.00943854	0	0.129689	0.0798669	0.153209	0.045017	0	0.0557543	0	0	0
TCGA-ZG-A8QW-01A	0.052299	0	0.0174103	0.111089	0	0.331927	0.0137733	0.0417818	0.00132468	0	0	0.0421603	0.00496197	0.101625	0.0659127	0.116931	0.0568086	0	0.0419963	0	0	0
TCGA-ZG-A8QX-01A	0.122035	0.0393551	0.109565	0.123638	0	0.171163	0	0.0622849	0.0305773	0	0	0.0740268	0.00594526	0.0326687	0.0513144	0.0854132	0.0253066	0	0.0667073	0	0	0
TCGA-ZG-A8QY-01A	0.153649	0	0.0852651	0	0	0.292797	0	0.0500317	0.00140756	0.00854708	0	0.0429409	0.0105939	0	0.087154	0.167644	0.0358427	0	0.0641273	0	0	0
TCGA-ZG-A8QZ-01A	0.0993927	0	0	0.09806	0	0.341724	0	0.0830423	0.0147498	0	0	0.0486254	0.00990264	0.0102402	0.0879328	0.0844988	0.0829496	0	0.0335558	0.00532598	0	0
TCGA-ZG-A9KY-01A	0.0393541	0	0.033426	0.323625	0	0	0	0.0520333	0.0628579	0.0379496	0	0.1554	0.00737613	0	0.119005	0.0906817	0.0117493	0	0.0618341	0	0.00470735	0
TCGA-ZG-A9L0-01A	0.0261566	0	0.0299263	0.0784379	0	0.265636	0	0.0358799	0.0402147	0.00423065	0	0.0679709	0.0309564	0.100906	0.0875634	0.102142	0.030146	0	0.0996723	0	0	0.00016126
TCGA-ZG-A9L1-01A	0.160698	0	0.158179	0.0598353	0	0.159169	0	0.0341999	0	0	0	0.0863518	0.00940109	0	0.0741047	0.154831	0	0	0.013147	0.0776159	0.0124684	0
TCGA-ZG-A9L2-01A	0.0661939	0.0470274	0.0663158	0.0717705	0	0.320755	0	0.0399541	0.0244726	0.0297773	0	0.1082	0	0.0199444	0.0379955	0.0738142	0.00771045	0	0.0860697	0	0	0
TCGA-ZG-A9L4-01A	0.0809236	0	0	0.0922981	0	0.378824	0	0.0363174	0.0149341	0	0	0.0590649	0.0137619	0	0.0759474	0.094053	0.0687353	0	0.0151404	0.0700002	0	0
TCGA-ZG-A9L5-01A	0.136317	0	0.108228	0.0771851	0	0.262928	0	0.0302395	0.00760363	0	0	0.0578516	6.31744e-05	0	0.0392343	0.223646	0.0113592	0	0.0453452	0	0	0
TCGA-ZG-A9L6-01A	0.0399981	0	0.0453156	0.0626589	0	0.271558	0	0.0120417	0.0093716	0	0	0.0544154	0.00024198	0	0.0306923	0.290489	0.0273639	0.000548579	0.155305	0	0	0
TCGA-ZG-A9L9-01A	0.0521075	0	0.00118488	0.11007	0	0.308664	0	0.00770002	0.0552077	0	0	0.0629441	0.0273626	0	0.0871173	0.140801	0.0450566	0.00930051	0.092484	0	0	0
TCGA-ZG-A9LB-01A	0.0132999	0	0.0880066	0.185844	0	0.141549	0.0473753	0.0233611	0.00990216	0	0	0.0900016	0	0	0.0380881	0.191435	0.0255631	0.00127891	0.140955	0	0.0033404	0
TCGA-ZG-A9LM-01A	0.0891294	0	0.0580444	0.0782679	0	0.278402	0	0.0281362	0.0270516	0	0	0.0437268	0.00520928	0.0863935	0.0988374	0.14473	0.00727631	0	0.0547957	0	0	0
TCGA-ZG-A9LN-01A	0.0421724	0.0278883	0.00912759	0.250362	0	0.121125	0.0133096	0.0698657	0.0904606	0.0155467	0	0.0474834	0	0.0352675	0.104765	0.0389546	0.0472032	0.0263024	0.0592495	0	0	0.000916764
TCGA-ZG-A9LS-01A	0.00868983	0.0621308	0.0236766	0.100032	0	0.314473	0.000979476	0.0296898	0.0675828	0.00909984	0	0.0453086	0.00619018	0.0144008	0.0655411	0.0899272	0.0891685	0	0.0731095	0	0	0
TCGA-ZG-A9LU-01A	0.00736692	0	0.0996356	0.0577685	0	0.20554	0	0.0337159	0.0527444	0	0	0.129035	0.0187142	0.0814878	0.101984	0.069636	0.0444791	0	0.0978939	0	0	0
TCGA-ZG-A9LY-01A	0.0752653	0	0.0205374	0.136728	0	0.243133	0	0.0131575	0.0331122	0	0	0.0174521	0.0334375	0.0835933	0.0262197	0.128079	0.0427426	0.000125619	0.146416	0	0	0
TCGA-ZG-A9LZ-01A	0.0885634	0	0.0961152	0.103048	0	0.146255	0.000497838	0.0552566	0.0479875	0	0	0.0684444	0.00940878	0.12675	0.127738	0.0385925	0.0136411	0	0.0777016	0	0	0
TCGA-ZG-A9M4-01A	0.0847228	0	0.0114603	0.204994	0	0.164487	0.00365107	0.0821172	0.033709	0.0477341	0	0.0681089	0.0101774	0.043365	0.0967043	0.0724641	0.0135404	0	0.0602207	0	0.00254448	0
TCGA-ZG-A9MC-01A	0.0353215	0.0625801	0.00612254	0.0944025	0	0.257439	0	0.0616558	0.0625085	0	0	0.0494686	0	0.12221	0.0655395	0.0831616	0.00949266	0.0497953	0.0403016	0	0	0
TCGA-ZG-A9N3-01A	0.0623929	0.187391	0.0464239	0.101397	0	0.175544	0.00861972	0.0804539	0.0802764	0.000127484	0	0.0499554	0	0.0504699	0.0557725	0.0208673	0.0247988	0.0321713	0.0233388	0	0	0
TCGA-ZG-A9ND-01A	0.0681515	0	0.077587	0.187093	0	0.192384	0	0.0420424	0.0148182	0	0	0.113194	0.0396076	0	0.0372769	0.0905133	0.00926962	0	0	0.128063	0	0
TCGA-ZG-A9NI-01A	0.110167	0	0.0319856	0.0502037	0	0.198942	0	0.0203907	0.0114879	0	0	0.0387972	0.0254785	0.00618626	0.0461559	0.248224	0	0.00279585	0.145364	0.0638218	0	0

## Sheet: timer_res
sample	B_cell	T_cell_CD4	T_cell_CD8	Neutrophil	Macrophage	DC
TCGA-2A-A8VL-01A	0.0604078	0.124294	0.176743	0.126307	0.127649	0.344874
TCGA-2A-A8VO-01A	0.0551053	0.11458	0.151202	0.116282	0.0212519	0.464932
TCGA-2A-A8VT-01A	0.0442068	0.111377	0.179871	0.130172	0.0505628	0.479507
TCGA-2A-A8VV-01A	0.0537824	0.113364	0.131673	0.0925239	0.00413053	0.416833
TCGA-2A-A8VX-01A	0.0646034	0.08897	0.139338	0.0939917	0	0.390354
TCGA-2A-A8W1-01A	0.0624408	0.0630307	0.153776	0.0956622	0.0160679	0.44674
TCGA-2A-A8W3-01A	0.0640213	0.125625	0.142073	0.107497	0.0462725	0.416274
TCGA-2A-AAYF-01A	0.0540185	0.0995987	0.183794	0.109847	0.0173833	0.464775
TCGA-2A-AAYO-01A	0.144105	0.181583	0.161791	0.133877	0.0415837	0.555728
TCGA-2A-AAYU-01A	0.0570163	0.104708	0.160664	0.105794	0.0511337	0.440343
TCGA-4L-AA1F-01A	0.158423	0.170962	0.266199	0.207756	0.243739	0.72691
TCGA-CH-5737-01A	0.0580321	0.0991896	0.196095	0.112983	0.027075	0.466095
TCGA-CH-5738-01A	0.0316788	0.137481	0.233005	0.204678	0.118746	0.644955
TCGA-CH-5739-01A	0.0494573	0.1125	0.263506	0.142459	0.0781811	0.541709
TCGA-CH-5740-01A	0.088538	0.129589	0.159842	0.115924	0.0423713	0.439204
TCGA-CH-5741-01A	0.0756461	0.0784697	0.140132	0.110461	0	0.418724
TCGA-CH-5743-01A	0.0579827	0.15621	0.260389	0.267979	0.0834875	0.643822
TCGA-CH-5744-01A	0.0462806	0.0971722	0.147555	0.113148	0.0123577	0.51803
TCGA-CH-5745-01A	0.045218	0.133813	0.282527	0.124821	0.104031	0.688758
TCGA-CH-5746-01A	0.0655904	0.113159	0.177528	0.123464	0.0485953	0.416346
TCGA-CH-5748-01A	0.0612153	0.0849957	0.219927	0.101583	0.0411721	0.524899
TCGA-CH-5750-01A	0.101546	0.138799	0.242205	0.149062	0.0327961	0.562959
TCGA-CH-5751-01A	0.255295	0.27089	0.30194	0.174666	0.0656245	0.666765
TCGA-CH-5752-01A	0.070813	0.104584	0.15172	0.111531	0.0174402	0.433543
TCGA-CH-5753-01A	0.0637083	0.0921346	0.226948	0.189673	0	0.509453
TCGA-CH-5754-01A	0.100468	0.171176	0.144784	0.147325	0.0189172	0.599877
TCGA-CH-5761-01A	0.0236964	0.0713549	0.170187	0.156916	0.145837	0.413898
TCGA-CH-5762-01A	0.082239	0.133796	0.250778	0.173521	0.0578494	0.570084
TCGA-CH-5763-01A	0.0350863	0.080897	0.281756	0.158582	0.039761	0.675034
TCGA-CH-5764-01A	0.0542165	0.105496	0.231692	0.133231	0.0334546	0.49026
TCGA-CH-5765-01A	0.0696779	0.0829538	0.16339	0.11723	0.0318369	0.407249
TCGA-CH-5766-01A	0.0535549	0.11256	0.262533	0.152201	0.0501689	0.534293
TCGA-CH-5767-01A	0.0399737	0.069536	0.194221	0.101955	0	0.539375
TCGA-CH-5768-01A	0.0702426	0.109304	0.170662	0.114654	0.0616097	0.427655
TCGA-CH-5769-01A	0.0782457	0.10784	0.171319	0.15707	0.0378348	0.448907
TCGA-CH-5771-01A	0.0950309	0.148694	0.202763	0.144803	0.105814	0.607374
TCGA-CH-5772-01A	0.0858415	0.101224	0.198217	0.117756	0.040507	0.457803
TCGA-CH-5788-01A	0.0593338	0.105988	0.18206	0.0833294	0.0235357	0.540144
TCGA-CH-5789-01A	0.0757682	0.103903	0.285313	0.171586	0.120496	0.55232
TCGA-CH-5790-01A	0.063288	0.105999	0.182112	0.124503	0.0393795	0.449436
TCGA-CH-5791-01A	0.0531219	0.0853731	0.192273	0.124663	0.0933873	0.478573
TCGA-CH-5792-01A	0.103922	0.166859	0.223304	0.154595	0.151092	0.579307
TCGA-CH-5794-01A	0.0619199	0.122106	0.164591	0.112811	0.0355903	0.454707
TCGA-EJ-5494-01A	0.0652191	0.111339	0.221267	0.128989	0.0684292	0.504788
TCGA-EJ-5495-01A	0.11086	0.166305	0.214688	0.139705	0.113519	0.549542
TCGA-EJ-5496-01A	0.0580294	0.105891	0.194262	0.110713	0.0221003	0.443657
TCGA-EJ-5497-01A	0.0731777	0.117234	0.240313	0.134332	0.102397	0.476935
TCGA-EJ-5498-01A	0.0834891	0.135592	0.264618	0.157614	0.131578	0.52323
TCGA-EJ-5499-01A	0.0874438	0.137827	0.199231	0.134628	0.0762263	0.491415
TCGA-EJ-5501-01A	0.0587212	0.130752	0.198069	0.113229	0.101149	0.465517
TCGA-EJ-5502-01A	0.0726613	0.151368	0.190739	0.16682	0.089008	0.538419
TCGA-EJ-5503-01A	0.0999068	0.142663	0.230292	0.154122	0.135909	0.491808
TCGA-EJ-5504-01A	0.0501573	0.103442	0.217134	0.10785	0.0802075	0.537335
TCGA-EJ-5505-01A	0.0836503	0.0954753	0.241787	0.12331	0.0740499	0.436208
TCGA-EJ-5506-01A	0.113502	0.0859976	0.280207	0.138287	0.0928465	0.503963
TCGA-EJ-5507-01A	0.124521	0.120647	0.220976	0.124429	0.0763559	0.506169
TCGA-EJ-5508-01A	0.0980349	0.134826	0.25097	0.156454	0.105656	0.509157
TCGA-EJ-5509-01A	0.0611135	0.153553	0.17719	0.136176	0.130084	0.510628
TCGA-EJ-5510-01A	0.0956448	0.106679	0.226494	0.127986	0.10633	0.51627
TCGA-EJ-5511-01A	0.047642	0.107477	0.229581	0.113135	0.0999158	0.495541
TCGA-EJ-5512-01A	0.0685476	0.122833	0.213865	0.121294	0.0685912	0.489759
TCGA-EJ-5514-01A	0.146859	0.112729	0.249884	0.146988	0.209786	0.519432
TCGA-EJ-5515-01A	0.108394	0.0920357	0.263762	0.133263	0.103958	0.463007
TCGA-EJ-5516-01A	0.08123	0.115904	0.2321	0.148583	0.0985728	0.508198
TCGA-EJ-5517-01A	0.0952516	0.0963066	0.275782	0.132492	0.0716673	0.506915
TCGA-EJ-5518-01A	0.0791503	0.118665	0.222904	0.12767	0.11102	0.52916
TCGA-EJ-5519-01A	0.0399201	0.0913006	0.222934	0.105503	0.0804157	0.480954
TCGA-EJ-5521-01A	0.0883853	0.0999016	0.165883	0.109544	0.0747405	0.48469
TCGA-EJ-5522-01A	0.0941531	0.128943	0.233323	0.131287	0.0719285	0.500279
TCGA-EJ-5524-01A	0.10841	0.114936	0.246628	0.129988	0.0972135	0.512166
TCGA-EJ-5525-01A	0.0834963	0.110692	0.184969	0.119649	0.0672834	0.475932
TCGA-EJ-5526-01A	0.0901255	0.0912808	0.269655	0.144106	0.129912	0.506759
TCGA-EJ-5527-01A	0.0865692	0.13076	0.266387	0.140509	0.11784	0.534842
TCGA-EJ-5530-01A	0.0574566	0.103764	0.166034	0.10495	0.030436	0.477743
TCGA-EJ-5531-01A	0.118174	0.131394	0.228372	0.14594	0.115242	0.613827
TCGA-EJ-5532-01A	0.0771756	0.11095	0.181769	0.119066	0.0644757	0.452577
TCGA-EJ-5542-01A	0.102612	0.105544	0.240093	0.122841	0.0790091	0.490084
TCGA-EJ-7115-01A	0.0555462	0.121886	0.206532	0.124239	0.0745121	0.469755
TCGA-EJ-7123-01A	0.0514276	0.116695	0.17497	0.1023	0.0479533	0.486383
TCGA-EJ-7125-01A	0.0748181	0.0751102	0.233237	0.113414	0.0874735	0.526484
TCGA-EJ-7314-01A	0.0617687	0.0889147	0.202252	0.126085	0.0455588	0.46749
TCGA-EJ-7315-01A	0.194921	0.200699	0.199469	0.130858	0.101954	0.599097
TCGA-EJ-7317-01A	0.0617829	0.111272	0.166229	0.102951	0.0636909	0.428979
TCGA-EJ-7321-01A	0.0713967	0.132157	0.203258	0.12414	0.0333945	0.465397
TCGA-EJ-7327-01A	0.110958	0.0929328	0.210462	0.118425	0.0869787	0.521609
TCGA-EJ-7328-01A	0.109764	0.182618	0.210013	0.156956	0.104135	0.535003
TCGA-EJ-7330-01A	0.077317	0.127478	0.22292	0.142278	0.0811991	0.514516
TCGA-EJ-7331-01A	0.100747	0.133578	0.204727	0.14204	0.0949993	0.499786
TCGA-EJ-7781-01A	0.0904693	0.130447	0.200581	0.142424	0.088348	0.475245
TCGA-EJ-7782-01A	0.0964894	0.129831	0.175524	0.135825	0.0609873	0.455162
TCGA-EJ-7783-01A	0.0740793	0.137036	0.238498	0.151452	0.107524	0.458117
TCGA-EJ-7784-01A	0.0657487	0.117911	0.164764	0.114464	0.0312692	0.428801
TCGA-EJ-7785-01A	0.0953135	0.147352	0.19782	0.161218	0.0719502	0.530599
TCGA-EJ-7786-01A	0.0488943	0.118534	0.216115	0.11008	0.0906774	0.510611
TCGA-EJ-7788-01A	0.0572395	0.125965	0.199676	0.107192	0.0773457	0.493303
TCGA-EJ-7789-01A	0.0649104	0.0764098	0.147744	0.0920943	0.0138411	0.443795
TCGA-EJ-7791-01A	0.0328809	0.150355	0.254033	0.136163	0.138259	0.56561
TCGA-EJ-7792-01A	0.110098	0.191417	0.239385	0.141321	0.1194	0.611219
TCGA-EJ-7793-01A	0.0760566	0.117112	0.191443	0.120587	0.0998174	0.396722
TCGA-EJ-7794-01A	0.0673893	0.151292	0.213965	0.135373	0.107919	0.584981
TCGA-EJ-7797-01A	0.0730794	0.13762	0.176395	0.134729	0.0661365	0.423697
TCGA-EJ-8468-01A	0.0739244	0.121372	0.295994	0.168895	0.114864	0.552067
TCGA-EJ-8469-01A	0.0793696	0.085046	0.199879	0.124374	0.00552982	0.474187
TCGA-EJ-8470-01A	0.145316	0.183233	0.292414	0.217511	0.084329	0.636033
TCGA-EJ-8472-01A	0.0728913	0.0917541	0.18885	0.126377	0.0234058	0.469567
TCGA-EJ-8474-01A	0.0705097	0.103081	0.204646	0.110216	0.063946	0.4656
TCGA-EJ-A46B-01A	0.0861376	0.124751	0.201835	0.125094	0.140869	0.406189
TCGA-EJ-A46D-01A	0.0894176	0.130787	0.174517	0.124955	0.0852464	0.455351
TCGA-EJ-A46E-01A	0.0034227	0.155458	0.28599	0.208211	0.0969176	0.568054
TCGA-EJ-A46F-01A	0.0344881	0.0834069	0.0916606	0.0903495	0	0.316111
TCGA-EJ-A46G-01A	0.0739951	0.137809	0.136782	0.128318	0.0461126	0.444823
TCGA-EJ-A46H-01A	0.0612783	0.170436	0.314769	0.214668	0.113433	0.658521
TCGA-EJ-A46I-01A	0.0628222	0.144412	0.175853	0.129583	0.0698341	0.473845
TCGA-EJ-A65B-01A	0.0534243	0.114301	0.141513	0.108529	0.0650207	0.492473
TCGA-EJ-A65D-01A	0.0468401	0.0728888	0.0825369	0.0917873	0	0.293402
TCGA-EJ-A65E-01A	0.0601082	0.119247	0.20574	0.131911	0.0572113	0.413333
TCGA-EJ-A65F-01A	0.0568231	0.117128	0.19359	0.133023	0.0372675	0.457823
TCGA-EJ-A65G-01A	0.0371802	0.116662	0.161874	0.105089	0.0297579	0.419957
TCGA-EJ-A65J-01A	0.145293	0.0633603	0.221883	0.0898922	0.0948743	0.525675
TCGA-EJ-A65M-01A	0.0679383	0.11652	0.199522	0.129314	0.0926558	0.446031
TCGA-EJ-A6RA-01A	0.0898766	0.126059	0.218155	0.126546	0.0935939	0.438708
TCGA-EJ-A6RC-01A	0.135439	0.182818	0.220576	0.138032	0.080098	0.573113
TCGA-EJ-A7NF-01A	0.044376	0.105985	0.118702	0.0963509	0	0.383649
TCGA-EJ-A7NG-01A	0.0697111	0.151312	0.206383	0.153603	0.114056	0.460141
TCGA-EJ-A7NH-01A	0.0833067	0.13289	0.183276	0.117002	0.0803055	0.426462
TCGA-EJ-A7NJ-01A	0.0845342	0.136652	0.188058	0.138756	0.12069	0.439117
TCGA-EJ-A7NK-01A	0.0640742	0.153845	0.167526	0.129814	0.117753	0.437288
TCGA-EJ-A7NM-01A	0.141025	0.205219	0.176514	0.134969	0.042515	0.604382
TCGA-EJ-A7NN-01A	0.0862609	0.177192	0.136222	0.17965	0.100552	0.422594
TCGA-EJ-A8FN-01A	0.0695598	0.142082	0.175309	0.115319	0.0322044	0.538132
TCGA-EJ-A8FO-01A	0.0755559	0.128943	0.187621	0.123548	0.0976392	0.40956
TCGA-EJ-A8FP-01A	0.073391	0.174985	0.213366	0.155692	0.180718	0.429359
TCGA-EJ-A8FS-01A	0.0497489	0.120632	0.1688	0.111706	0.025881	0.468389
TCGA-EJ-A8FU-01A	0.0862102	0.150633	0.200212	0.146696	0.0962406	0.496396
TCGA-EJ-AB20-01A	0.024355	0.168851	0.24791	0.138574	0.108539	0.579866
TCGA-EJ-AB27-01A	0.109045	0.178533	0.190645	0.132159	0.0696924	0.500982
TCGA-FC-7708-01A	0.0961269	0.140134	0.238313	0.146865	0.127846	0.532152
TCGA-FC-7961-01A	0.0869576	0.134707	0.219206	0.148199	0.176913	0.454925
TCGA-FC-A4JI-01A	0.0444373	0.0663249	0.141475	0.102235	0	0.413096
TCGA-FC-A5OB-01A	0.0900103	0.0535431	0.187006	0.109486	0.0236169	0.387754
TCGA-FC-A66V-01A	0.0751622	0.134874	0.152144	0.126725	0.175075	0.410285
TCGA-FC-A6HD-01A	0.0514675	0.0619661	0.119549	0.0972007	0	0.319136
TCGA-FC-A8O0-01A	0.0529674	0.145607	0.15932	0.125347	0.102125	0.380601
TCGA-G9-6329-01A	0.0909322	0.110416	0.177073	0.126227	0.0317983	0.48632
TCGA-G9-6332-01A	0.0473795	0.104279	0.128912	0.0960764	0.0321092	0.373295
TCGA-G9-6333-01A	0.0487509	0.110967	0.211115	0.133776	0.0251837	0.565569
TCGA-G9-6336-01A	0.0706487	0.107704	0.187567	0.116647	0.0971468	0.454588
TCGA-G9-6338-01A	0.0755212	0.164368	0.0933562	0.10034	0	0.410718
TCGA-G9-6339-01A	0.0590816	0.104974	0.175207	0.115532	0.0475181	0.441941
TCGA-G9-6342-01A	0.0508371	0.112039	0.142811	0.131128	0.0473021	0.414027
TCGA-G9-6343-01A	0.0540271	0.0877452	0.133765	0.0896968	0	0.435257
TCGA-G9-6347-01A	0.0612578	0.180575	0.119836	0.106908	0.0335025	0.570309
TCGA-G9-6348-01A	0.085067	0.0977074	0.245879	0.129979	0.0941881	0.553616
TCGA-G9-6351-01A	0.0697238	0.109134	0.205883	0.118894	0.100953	0.416006
TCGA-G9-6353-01A	0.0692481	0.12562	0.182341	0.118432	0.154762	0.398639
TCGA-G9-6354-01A	0.0534975	0.0942754	0.130605	0.10225	0.0406568	0.354978
TCGA-G9-6356-01A	0.0646077	0.139046	0.205883	0.131609	0.111204	0.531566
TCGA-G9-6361-01A	0.0858723	0.1121	0.165228	0.100452	0.0652991	0.47532
TCGA-G9-6362-01A	0.0594812	0.105506	0.107566	0.0929559	0	0.350319
TCGA-G9-6363-01A	0.0919954	0.0887709	0.201195	0.127264	0.0335562	0.479312
TCGA-G9-6364-01A	0.0615341	0.130969	0.165269	0.104232	0.1053	0.478847
TCGA-G9-6365-01A	0.0506013	0.136515	0.175209	0.118566	0.060636	0.491073
TCGA-G9-6366-01A	0.0537557	0.0803557	0.209156	0.103176	0.073375	0.440646
TCGA-G9-6367-01A	0.086454	0.122398	0.223044	0.131535	0.138663	0.432443
TCGA-G9-6369-01A	0.0619462	0.117308	0.132525	0.102728	0.0373152	0.403098
TCGA-G9-6370-01A	0.0775329	0.131291	0.268318	0.158109	0.184103	0.502023
TCGA-G9-6371-01A	0.0568814	0.0854937	0.192585	0.0971744	0.0233093	0.492947
TCGA-G9-6373-01A	0.0545389	0.116089	0.165106	0.119153	0.041253	0.449241
TCGA-G9-6377-01A	0.0591766	0.0812784	0.198252	0.127115	0.0349741	0.506778
TCGA-G9-6378-01A	0.0896867	0.111059	0.165831	0.107701	0.0546903	0.463917
TCGA-G9-6379-01A	0.0554362	0.197585	0.134412	0.139418	0.089127	0.497331
TCGA-G9-6384-01A	0.0760277	0.11686	0.229246	0.128895	0.0748762	0.514382
TCGA-G9-6385-01A	0.0663187	0.129409	0.219427	0.136758	0.119226	0.429559
TCGA-G9-6494-01A	0.141923	0.0819226	0.234918	0.107995	0.0987668	0.436762
TCGA-G9-6496-01A	0.0431271	0.103846	0.11597	0.0946482	0.0082266	0.407532
TCGA-G9-6498-01A	0.0820287	0.166428	0.204901	0.142416	0.00136741	0.532132
TCGA-G9-6499-01A	0.0783858	0.0969948	0.22	0.120864	0.0576253	0.500109
TCGA-G9-7509-01A	0.0718954	0.0973541	0.181339	0.113743	0.04843	0.428236
TCGA-G9-7510-01A	0.0757366	0.110153	0.208116	0.134108	0.0924247	0.535963
TCGA-G9-7519-01A	0.0561517	0.0895686	0.173416	0.0999529	0.0569403	0.489988
TCGA-G9-7521-01A	0.12591	0.112557	0.323292	0.147846	0.232292	0.519489
TCGA-G9-7522-01A	0.0878661	0.107046	0.198812	0.116517	0.123108	0.452009
TCGA-G9-7523-01A	0.106828	0.159254	0.240178	0.120505	0.108325	0.726842
TCGA-G9-7525-01A	0.056487	0.102338	0.150973	0.0920067	0.0530724	0.480944
TCGA-G9-A9S0-01A	0.0881071	0.130695	0.166298	0.117551	0.048673	0.472908
TCGA-G9-A9S7-01A	0.0710197	0.113644	0.131882	0.118429	0.0349203	0.387687
TCGA-H9-7775-01A	0.0721986	0.118274	0.165681	0.116264	0.0708212	0.467806
TCGA-H9-A6BX-01A	0.0872516	0.197133	0.170702	0.15297	0.135787	0.572345
TCGA-H9-A6BY-01A	0.030723	0.0866741	0.106202	0.0902927	0	0.348202
TCGA-HC-7075-01A	0.0660034	0.110917	0.176971	0.111824	0.030789	0.505969
TCGA-HC-7077-01A	0.0505042	0.0948631	0.156887	0.0989208	0.0633007	0.397997
TCGA-HC-7078-01A	0.074182	0.120161	0.15699	0.12027	0.0670249	0.440182
TCGA-HC-7079-01A	0.518193	0.50577	0.279609	0.406762	0.149175	1.22041
TCGA-HC-7080-01A	0.0662229	0.118448	0.148594	0.11708	0.0591813	0.375781
TCGA-HC-7081-01A	0.0761821	0.159753	0.163773	0.124084	0.142378	0.544547
TCGA-HC-7209-01A	0.0271687	0.130101	0.150168	0.130896	0.0537369	0.445006
TCGA-HC-7210-01A	0.0395806	0.119069	0.253005	0.140429	0.0787996	0.614396
TCGA-HC-7211-01A	0.0482971	0.103205	0.235648	0.164985	0.0491662	0.53044
TCGA-HC-7212-01A	0.0588197	0.0866804	0.152571	0.132019	0.0141697	0.420748
TCGA-HC-7213-01A	0.0676634	0.147245	0.177216	0.128801	0.106881	0.480058
TCGA-HC-7230-01A	0.048987	0.0994165	0.162154	0.114258	0.0043043	0.441626
TCGA-HC-7231-01A	0.0829606	0.13122	0.165843	0.122628	0.0395546	0.497386
TCGA-HC-7232-01A	0.0761693	0.0996756	0.180744	0.111149	0.0688502	0.454106
TCGA-HC-7233-01A	0.0661454	0.154277	0.234711	0.134544	0.128034	0.624331
TCGA-HC-7736-01A	0.104005	0.0856226	0.323145	0.144894	0.0890941	0.588565
TCGA-HC-7737-01A	0.0683673	0.119898	0.288882	0.166856	0.0663264	0.643284
TCGA-HC-7738-01A	0.0801405	0.094895	0.171016	0.0983201	0.0498515	0.4884
TCGA-HC-7740-01A	0.0450118	0.134285	0.237656	0.150073	0.0782707	0.561055
TCGA-HC-7742-01A	0.1154	0.111811	0.19126	0.105152	0.0763187	0.474473
TCGA-HC-7744-01A	0.0652906	0.108427	0.133188	0.114139	0.0252317	0.429528
TCGA-HC-7745-01A	0.0912436	0.158501	0.219848	0.133039	0.116374	0.549946
TCGA-HC-7747-01A	0.0798263	0.125415	0.2225	0.133308	0.140689	0.491568
TCGA-HC-7748-01A	0.0659513	0.130789	0.218354	0.140121	0.0686596	0.520791
TCGA-HC-7749-01A	0.0658899	0.112585	0.189291	0.109728	0.128813	0.474981
TCGA-HC-7750-01A	0.0581389	0.124748	0.177683	0.105951	0.0560384	0.516123
TCGA-HC-7752-01A	0.0286557	0.102523	0.0542456	0.0787503	0	0.298811
TCGA-HC-7818-01A	0.0579417	0.131554	0.16332	0.144429	0.0666628	0.505127
TCGA-HC-7819-01A	0.0538216	0.101204	0.15051	0.102432	0.00853345	0.426546
TCGA-HC-7820-01A	0.0607702	0.112007	0.168718	0.112299	0.0665621	0.41469
TCGA-HC-7821-01A	0.113875	0.11699	0.167112	0.135146	0.0741047	0.518733
TCGA-HC-8213-01A	0.0515224	0.0869611	0.167669	0.0996521	0.0147626	0.40979
TCGA-HC-8216-01A	0.0817033	0.134383	0.210074	0.13494	0.105295	0.479215
TCGA-HC-8256-01A	0.0577178	0.119044	0.186365	0.106508	0.0289654	0.446343
TCGA-HC-8257-01A	0.0659481	0.115464	0.154484	0.103867	0.0326661	0.435511
TCGA-HC-8258-01A	0.0647206	0.133377	0.220518	0.146613	0.113752	0.462634
TCGA-HC-8259-01A	0.092203	0.0831988	0.139313	0.103033	0.0142493	0.408316
TCGA-HC-8260-01A	0.0894441	0.11304	0.209556	0.135598	0.1245	0.418645
TCGA-HC-8261-01A	0.0924818	0.119634	0.158267	0.126135	0.0555352	0.43681
TCGA-HC-8262-01A	0.0779097	0.0921498	0.18344	0.115136	0.0436205	0.441964
TCGA-HC-8265-01A	0.0530139	0.138765	0.13979	0.122887	0.0355383	0.450085
TCGA-HC-8266-01A	0.163392	0.25481	0.287246	0.218293	0.10973	0.69279
TCGA-HC-A48F-01A	0.0593726	0.0745294	0.140386	0.10463	0.0319572	0.403812
TCGA-HC-A4ZV-01A	0.150589	0.127123	0.222547	0.134352	0.0809424	0.490327
TCGA-HC-A631-01A	0.0648139	0.0960091	0.163821	0.106527	0.0921487	0.385405
TCGA-HC-A632-01A	0.181268	0.168645	0.209499	0.139838	0.0485267	0.595931
TCGA-HC-A6AL-01A	0.0327345	0.131436	0.114965	0.107668	0.0561202	0.487944
TCGA-HC-A6AN-01A	0.0326783	0.11563	0.0965652	0.102649	0.029989	0.416441
TCGA-HC-A6AO-01A	0.0345347	0.103145	0.105587	0.140056	0.0125667	0.462072
TCGA-HC-A6AP-01A	0.0297861	0.145047	0.12337	0.127705	0.0762503	0.488741
TCGA-HC-A6AQ-01A	0.0416498	0.125111	0.139876	0.103341	0.0633364	0.406168
TCGA-HC-A6AS-01A	0.00972263	0.169356	0.131598	0.142972	0.116229	0.531195
TCGA-HC-A6HX-01A	0.0517371	0.138758	0.124723	0.120311	0.0528659	0.452648
TCGA-HC-A6HY-01A	0.0597724	0.0850698	0.154495	0.115042	0.0121386	0.409141
TCGA-HC-A76W-01A	0.0526206	0.119833	0.177139	0.132971	0.0822834	0.504927
TCGA-HC-A76X-01A	0.0598745	0.0763601	0.126715	0.104634	0	0.373536
TCGA-HC-A8CY-01A	0.109475	0.0934501	0.19296	0.144232	0	0.489088
TCGA-HC-A8D0-01A	0.067931	0.142128	0.16637	0.125606	0.0714366	0.486254
TCGA-HC-A8D1-01A	0.0649857	0.120847	0.221283	0.128951	0.0726015	0.50608
TCGA-HC-A9TE-01A	0.120883	0.215273	0.203168	0.132194	0.0888479	0.630461
TCGA-HC-A9TH-01A	0.143743	0.140991	0.146545	0.12567	0.0586723	0.541343
TCGA-HI-7168-01A	0.065618	0.112676	0.193142	0.119092	0.0484735	0.529771
TCGA-HI-7169-01A	0.0500699	0.142998	0.0614376	0.0888188	0	0.387743
TCGA-HI-7170-01A	0.0445101	0.128184	0.25638	0.174848	0.120061	0.569651
TCGA-HI-7171-01A	0.0845608	0.0943549	0.183731	0.118343	0.0212176	0.443871
TCGA-J4-8198-01A	0.0885379	0.101127	0.167503	0.114897	0.0405941	0.426404
TCGA-J4-8200-01A	0.0710075	0.0949247	0.220348	0.119538	0.0661638	0.539284
TCGA-J4-A67K-01A	0.0337872	0.124981	0.100006	0.133908	0	0.401781
TCGA-J4-A67L-01A	0.0736369	0.132768	0.144401	0.119052	0.056631	0.47164
TCGA-J4-A67M-01A	0.0405116	0.163234	0.161357	0.136315	0.0877774	0.573719
TCGA-J4-A67N-01A	0.0242607	0.105669	0.147533	0.110586	0.0311192	0.487509
TCGA-J4-A67O-01A	0.0190879	0.130525	0.117543	0.112794	0.0542682	0.44819
TCGA-J4-A67Q-01A	0.0262798	0.162453	0.132005	0.115827	0.062722	0.534693
TCGA-J4-A67R-01A	0.0551948	0.187184	0.0990404	0.142878	0.0542707	0.451875
TCGA-J4-A67S-01A	0.0257661	0.136056	0.137931	0.123206	0.0437914	0.419763
TCGA-J4-A67T-01A	0.0505272	0.124202	0.223403	0.146873	0.0765149	0.503211
TCGA-J4-A6G1-01A	0.469238	0.306014	0.232307	0.224571	0.0927458	0.739904
TCGA-J4-A6G3-01A	0.0655611	0.194927	0.24208	0.195495	0.0848485	0.630987
TCGA-J4-A6M7-01A	0.0504831	0.0943413	0.156015	0.109111	0.0052646	0.429877
TCGA-J4-A83I-01A	0.0988191	0.113466	0.193264	0.123314	0.0436322	0.485141
TCGA-J4-A83J-01A	0	0.149393	0.254895	0.156198	0.0469356	0.558224
TCGA-J4-A83K-01A	0.0570862	0.138159	0.149349	0.115679	0.057547	0.457276
TCGA-J4-A83L-01A	0.0529293	0.105894	0.207615	0.142578	0.0425975	0.495478
TCGA-J4-A83M-01A	0.0422466	0.124979	0.198931	0.116564	0.0259011	0.506058
TCGA-J4-A83N-01A	0.0394415	0.0969401	0.155886	0.109977	0.00211553	0.461228
TCGA-J4-AATV-01A	0.0580589	0.15869	0.181166	0.192556	0.0518044	0.599379
TCGA-J4-AATZ-01A	0.0492374	0.0859787	0.189398	0.121061	0.0655504	0.421009
TCGA-J4-AAU2-01A	0.0290078	0.133428	0.204338	0.107122	0.0401811	0.508218
TCGA-J9-A52B-01A	0.0627002	0.129265	0.150864	0.12026	0.0882306	0.443544
TCGA-J9-A52C-01A	0.0636961	0.126219	0.239134	0.180741	0.118399	0.626159
TCGA-J9-A52D-01A	0.074308	0.0833277	0.190283	0.0992923	0.0501423	0.436351
TCGA-J9-A52E-01A	0.0709067	0.148789	0.177396	0.129972	0.0976594	0.59568
TCGA-J9-A8CK-01A	0.0552184	0.119907	0.146874	0.12648	0.0671576	0.476523
TCGA-J9-A8CL-01A	0.0999251	0.136617	0.129686	0.119016	0.0980697	0.528571
TCGA-J9-A8CM-01A	0.0727245	0.153949	0.102576	0.117214	0.0891708	0.45359
TCGA-J9-A8CN-01A	0.0247259	0.073399	0.183921	0.116189	0	0.486735
TCGA-J9-A8CP-01A	0.0520908	0.103718	0.223811	0.113103	0.0475329	0.555885
TCGA-KC-A4BL-01A	0.0702268	0.155956	0.246885	0.167419	0.119136	0.555656
TCGA-KC-A4BN-01A	0.0672974	0.0943553	0.206683	0.11952	0.0415858	0.512746
TCGA-KC-A4BR-01A	0.0207169	0.11901	0.181771	0.149381	0	0.639521
TCGA-KC-A4BV-01A	0.0889483	0.125816	0.174349	0.120271	0.0756307	0.478295
TCGA-KC-A7F3-01A	0.0455612	0.114001	0.182091	0.128456	0.0309645	0.550978
TCGA-KC-A7F5-01A	0.0396811	0.0765256	0.124045	0.0961254	0	0.336775
TCGA-KC-A7F6-01A	0.0674324	0.123193	0.136274	0.119387	0.0349862	0.44215
TCGA-KC-A7FA-01A	0.0846078	0.093308	0.167493	0.100096	0.0288886	0.513944
TCGA-KC-A7FD-01A	0.0513807	0.0821824	0.196094	0.0990494	0.0297423	0.537328
TCGA-KC-A7FE-01A	0.0690833	0.153812	0.185042	0.130396	0.0898151	0.518823
TCGA-KK-A59V-01A	0.148554	0.33019	0.498791	0.199885	0.0424695	0.785484
TCGA-KK-A59X-01A	0.0665025	0.0844022	0.183906	0.126882	0.0604872	0.520205
TCGA-KK-A59Y-01A	0.0686768	0.107276	0.11693	0.108893	0.0228095	0.397466
TCGA-KK-A59Z-01A	0.0900861	0.0854552	0.148168	0.124059	0.0160149	0.522373
TCGA-KK-A5A1-01A	0.109733	0.0862338	0.179457	0.1211	0.0853862	0.455728
TCGA-KK-A6DY-01A	0.0515422	0.0968873	0.208343	0.166044	0.0326511	0.548988
TCGA-KK-A6E0-01A	0.0618722	0.122515	0.185143	0.137589	0.0642544	0.388592
TCGA-KK-A6E1-01A	0.0612993	0.113945	0.12587	0.125071	0.0318872	0.420793
TCGA-KK-A6E2-01A	0.0807816	0.0888703	0.141184	0.104117	0.00140709	0.412413
TCGA-KK-A6E3-01A	0.0756821	0.133874	0.163376	0.120254	0.0670679	0.519194
TCGA-KK-A6E4-01A	0.0440387	0.0861371	0.115522	0.1046	0	0.382155
TCGA-KK-A6E5-01A	0.097632	0.0998569	0.208611	0.120814	0.059146	0.483113
TCGA-KK-A6E6-01A	0.0534947	0.105705	0.193501	0.130773	0.0276695	0.502819
TCGA-KK-A6E7-01A	0.0207989	0.0950122	0.181073	0.102377	0.0526896	0.511452
TCGA-KK-A6E8-01A	0.0542909	0.0724351	0.119424	0.0910568	0	0.364099
TCGA-KK-A7AP-01A	0.0781766	0.072205	0.154792	0.103993	0	0.397467
TCGA-KK-A7AQ-01A	0.0258478	0.169222	0.0757459	0.10112	0.0579565	0.376119
TCGA-KK-A7AU-01A	0.0609141	0.0823509	0.117665	0.0990066	0	0.353371
TCGA-KK-A7AV-01A	0.118431	0.218553	0.200179	0.160035	0.0883041	0.584382
TCGA-KK-A7AW-01A	0.0478865	0.119251	0.10439	0.0980628	0.0199155	0.426001
TCGA-KK-A7AY-01A	0.0381055	0.090047	0.133642	0.104377	0.0242362	0.397917
TCGA-KK-A7AZ-01A	0.0652536	0.140822	0.132432	0.0946807	0.0196473	0.413715
TCGA-KK-A7B0-01A	0.0680591	0.209127	0.113881	0.130555	0.100962	0.507383
TCGA-KK-A7B1-01A	0.0835869	0.116966	0.117238	0.135569	0.0220826	0.462627
TCGA-KK-A7B2-01A	0.079466	0.153029	0.213842	0.150188	0.136082	0.587808
TCGA-KK-A7B3-01A	0.0597295	0.145987	0.158392	0.125367	0.072274	0.507349
TCGA-KK-A7B4-01A	0.071448	0.118936	0.156193	0.116226	0.0134852	0.479191
TCGA-KK-A8I4-01A	0.113985	0.190256	0.250574	0.172808	0.093249	0.630084
TCGA-KK-A8I5-01A	0.0636858	0.104184	0.155148	0.112247	0.0160067	0.516568
TCGA-KK-A8I6-01A	0.0729722	0.113157	0.160805	0.118025	0.0441434	0.421388
TCGA-KK-A8I7-01A	0.0703944	0.154454	0.161212	0.136067	0.0870192	0.49249
TCGA-KK-A8I8-01A	0.0689006	0.0986098	0.145564	0.109561	0.0301926	0.402259
TCGA-KK-A8I9-01A	0.0364982	0.165694	0.226616	0.179995	0.0728674	0.607393
TCGA-KK-A8IA-01A	0.0649443	0.0890882	0.123663	0.105018	0.0242891	0.391761
TCGA-KK-A8IB-01A	0.0514882	0.151119	0.167155	0.125142	0.0294024	0.55751
TCGA-KK-A8IC-01A	0.0986199	0.149916	0.180242	0.153007	0.128655	0.518204
TCGA-KK-A8ID-01A	0.0526303	0.0819175	0.170473	0.097045	0.0211631	0.448262
TCGA-KK-A8IF-01A	0.0332645	0.116974	0.151007	0.0994499	0.0154367	0.447199
TCGA-KK-A8IG-01A	0.0530621	0.109857	0.176742	0.125422	0.0396998	0.553481
TCGA-KK-A8IH-01A	0.143677	0.118755	0.165777	0.122303	0.0266027	0.522619
TCGA-KK-A8II-01A	0.048866	0.0914298	0.151658	0.112374	0.00928696	0.406077
TCGA-KK-A8IJ-01A	0.0650619	0.0722192	0.228444	0.127861	0.00194302	0.556225
TCGA-KK-A8IK-01A	0.0561707	0.0996349	0.0941889	0.0944717	0.0129602	0.34314
TCGA-KK-A8IL-01A	0.114764	0.133199	0.271352	0.169212	0.0812658	0.646681
TCGA-KK-A8IM-01A	0.0612908	0.1375	0.164061	0.130374	0.0587982	0.487898
TCGA-M7-A71Y-01A	0.0714313	0.123647	0.186237	0.124906	0.101834	0.486629
TCGA-M7-A71Z-01A	0.0511058	0.0901903	0.0647142	0.0847178	0	0.325392
TCGA-M7-A720-01A	0.092305	0.125011	0.197457	0.125452	0.114345	0.464742
TCGA-M7-A721-01A	0.0592084	0.126802	0.167945	0.113541	0.0870524	0.466118
TCGA-M7-A722-01A	0.0346725	0.0744333	0.102123	0.0896554	0.00238988	0.377558
TCGA-M7-A723-01A	0.0996816	0.143236	0.208838	0.121375	0.107336	0.510554
TCGA-M7-A724-01A	0.0563362	0.0650631	0.117488	0.0947201	0	0.352546
TCGA-M7-A725-01A	0.0848238	0.0989699	0.137569	0.102722	0.059326	0.503626
TCGA-MG-AAMC-01A	0.0357521	0.0858085	0.10852	0.0882378	0	0.365152
TCGA-QU-A6IL-01A	0.0269392	0.0937868	0.148502	0.10702	0	0.42629
TCGA-QU-A6IM-01A	0.0330414	0.12069	0.172318	0.125021	0.0234542	0.425138
TCGA-QU-A6IN-01A	0.0238354	0.0829739	0.0901236	0.0909495	0	0.342892
TCGA-QU-A6IO-01A	0.0340457	0.128142	0.134919	0.110984	0.0332405	0.412947
TCGA-QU-A6IP-01A	0.0541488	0.124776	0.132037	0.1149	0.0481899	0.420456
TCGA-SU-A7E7-01A	0.0455941	0.147815	0.226097	0.161137	0.10884	0.479249
TCGA-TK-A8OK-01A	0.0643101	0.12439	0.203381	0.137456	0.0988958	0.605152
TCGA-TP-A8TT-01A	0.0755207	0.183407	0.1812	0.149686	0.0980085	0.526603
TCGA-TP-A8TV-01A	0.0393852	0.131086	0.135093	0.108803	0.0348167	0.385603
TCGA-V1-A8MF-01A	0.0645054	0.114995	0.215833	0.12637	0.0504389	0.512672
TCGA-V1-A8MG-01A	0.0689662	0.135665	0.192098	0.124673	0.0470159	0.471255
TCGA-V1-A8MK-01A	0.0625898	0.136925	0.202096	0.12592	0.106167	0.459905
TCGA-V1-A8ML-01A	0.075804	0.0929324	0.139743	0.100214	0.0367001	0.44492
TCGA-V1-A8MM-01A	0.0606421	0.145086	0.124434	0.107799	0.0797798	0.465403
TCGA-V1-A8MU-01A	0.0771443	0.159972	0.229057	0.138045	0.0899375	0.547422
TCGA-V1-A8WL-01A	0.0979352	0.141589	0.224923	0.146932	0.0596589	0.506601
TCGA-V1-A8WN-01A	0.0699968	0.128419	0.201307	0.133712	0.0987534	0.460718
TCGA-V1-A8WS-01A	0.0671943	0.104205	0.132475	0.0997327	0.00310116	0.406138
TCGA-V1-A8WV-01A	0.09922	0.179894	0.119399	0.135924	0.110444	0.476961
TCGA-V1-A8WW-01A	0.0526604	0.15128	0.111077	0.148443	0.0483821	0.444669
TCGA-V1-A8X3-01A	0.040974	0.106399	0.176767	0.0988791	0.0534665	0.553483
TCGA-V1-A9O5-01A	0.0564905	0.203717	0.129931	0.146713	0.111307	0.548674
TCGA-V1-A9O7-01A	0.0408914	0.134459	0.215462	0.168129	0.0414806	0.610099
TCGA-V1-A9O9-01A	0.17321	0.286339	0.150611	0.158535	0.055112	0.562274
TCGA-V1-A9OA-01A	0.0699837	0.130108	0.184973	0.127269	0.0725352	0.493759
TCGA-V1-A9OF-01A	0.0802991	0.103494	0.175284	0.11041	0.0549186	0.41491
TCGA-V1-A9OH-01A	0.0730836	0.104452	0.162179	0.10705	0.0590578	0.472413
TCGA-V1-A9OL-01A	0.0743828	0.130236	0.153858	0.11413	0.0681176	0.45863
TCGA-V1-A9OQ-01A	0.0576004	0.110858	0.179019	0.101419	0.0190907	0.450996
TCGA-V1-A9OT-01A	0.0387605	0.127392	0.0793594	0.104039	0	0.331408
TCGA-V1-A9OX-01A	0.0570281	0.155891	0.14557	0.127849	0.0609468	0.445566
TCGA-V1-A9OY-01A	0.0812719	0.15405	0.15446	0.130435	0.0786316	0.443229
TCGA-V1-A9Z7-01A	0.0654466	0.123781	0.157656	0.104722	0.0772295	0.513028
TCGA-V1-A9Z8-01A	0.0610449	0.14083	0.185546	0.130816	0.078292	0.497439
TCGA-V1-A9Z9-01A	0.0773545	0.129648	0.177674	0.124247	0.109442	0.432382
TCGA-V1-A9ZG-01A	0.0767637	0.108518	0.145289	0.122711	0.0803514	0.466326
TCGA-V1-A9ZI-01A	0.0662756	0.130088	0.115236	0.104299	0.107485	0.431811
TCGA-V1-A9ZK-01A	0.0656192	0.139831	0.192217	0.122276	0.083997	0.459847
TCGA-V1-A9ZR-01A	0.0586452	0.189276	0.206102	0.135857	0.155877	0.599138
TCGA-VN-A88I-01A	0.052909	0.207492	0.177008	0.146477	0.117446	0.589806
TCGA-VN-A88K-01A	0.0582337	0.123483	0.177154	0.124443	0.0242291	0.473217
TCGA-VN-A88L-01A	0.0461003	0.10208	0.150516	0.114764	0.0200578	0.466155
TCGA-VN-A88M-01A	0.0577111	0.0893091	0.107375	0.101694	0	0.343949
TCGA-VN-A88N-01A	0.058658	0.0829247	0.178328	0.109007	0.0305958	0.432202
TCGA-VN-A88O-01A	0.0539734	0.11411	0.16799	0.131541	0	0.499241
TCGA-VN-A88P-01A	0.082581	0.107652	0.198861	0.121682	0.0336931	0.485382
TCGA-VN-A88Q-01A	0.0529091	0.095607	0.131283	0.12268	0.00347127	0.416006
TCGA-VN-A88R-01A	0.0602523	0.121638	0.147707	0.123591	0.0755673	0.466067
TCGA-VN-A943-01A	0.0627977	0.082825	0.142188	0.102931	0	0.380086
TCGA-VP-A872-01A	0.0885748	0.20157	0.130965	0.142345	0.0739708	0.573445
TCGA-VP-A875-01A	0.0771581	0.082257	0.126369	0.0997673	0	0.362905
TCGA-VP-A876-01A	0.0409769	0.0902243	0.176154	0.106281	0	0.407666
TCGA-VP-A878-01A	0.0702616	0.158914	0.212392	0.163291	0.136375	0.485887
TCGA-VP-A879-01A	0.0727524	0.125588	0.143733	0.116652	0.0653693	0.435608
TCGA-VP-A87B-01A	0.0607321	0.097887	0.117196	0.100991	0.0270964	0.394673
TCGA-VP-A87C-01A	0.20977	0.338978	0.322092	0.235859	0.0871016	0.808175
TCGA-VP-A87D-01A	0.0742893	0.0882051	0.132329	0.10369	0.00894421	0.375778
TCGA-VP-A87E-01A	0.0381908	0.159942	0.286314	0.170686	0	0.747599
TCGA-VP-A87H-01A	0.0668116	0.110867	0.149476	0.126418	0.0155482	0.467009
TCGA-VP-A87J-01A	0.0783943	0.0775128	0.227065	0.0961759	0.0885412	0.55103
TCGA-VP-A87K-01A	0.0674444	0.10114	0.145894	0.106089	0.00192935	0.411464
TCGA-VP-AA1N-01A	0.0628745	0.103233	0.171999	0.12562	0.0679259	0.570289
TCGA-WW-A8ZI-01A	0.0679839	0.0931051	0.144975	0.109852	0.00932729	0.396207
TCGA-X4-A8KQ-01A	0.0559964	0.095661	0.142201	0.131076	0.00892172	0.492816
TCGA-X4-A8KS-01A	0.036791	0.144831	0.103486	0.110867	0.00443687	0.371173
TCGA-XA-A8JR-01A	0.0588349	0.124115	0.140497	0.130284	0.0356956	0.469797
TCGA-XJ-A83F-01A	0.0456146	0.11051	0.0849061	0.101933	0.00254688	0.399393
TCGA-XJ-A83G-01A	0.0520081	0.0962655	0.134928	0.0975949	0.0313093	0.424086
TCGA-XJ-A83H-01A	0.0116173	0.0880267	0.228846	0.138965	0	0.561329
TCGA-XJ-A9DI-01A	0.106252	0.218891	0.234687	0.183822	0.173407	0.585618
TCGA-XJ-A9DK-01A	0.0898202	0.115964	0.226609	0.142685	0.119004	0.486923
TCGA-XJ-A9DQ-01A	0.0592909	0.136892	0.156398	0.117563	0.0774546	0.419716
TCGA-XJ-A9DX-01A	0.0875657	0.119165	0.0918636	0.105813	0.0138542	0.37441
TCGA-XK-AAIR-01A	0.0768881	0.120384	0.226424	0.1275	0.0802377	0.525246
TCGA-XK-AAIV-01A	0.173154	0.236328	0.188188	0.184637	0.148324	0.720949
TCGA-XK-AAIW-01A	0.0856679	0.0921201	0.209192	0.106176	0.00164858	0.465338
TCGA-XK-AAJA-01A	0.07023	0.127091	0.1545	0.116746	0.0281485	0.453763
TCGA-XK-AAJP-01A	0.0415194	0.133344	0.172651	0.108728	0.0224905	0.515755
TCGA-XK-AAJR-01A	0.072576	0.103472	0.174068	0.120491	0.0651171	0.431991
TCGA-XK-AAJT-01A	0.0585457	0.136759	0.152697	0.133214	0.0721612	0.481167
TCGA-XK-AAJU-01A	0.0838197	0.137892	0.224934	0.146295	0.0875319	0.496178
TCGA-XQ-A8TA-01A	0.0688218	0.122616	0.0746318	0.0976433	0	0.356191
TCGA-XQ-A8TB-01A	0.0433469	0.107446	0.172644	0.125227	0.0388978	0.47485
TCGA-Y6-A8TL-01A	0.066408	0.131587	0.168231	0.116194	0.0331325	0.446691
TCGA-Y6-A9XI-01A	0.13479	0.0767958	0.222778	0.10836	0.0439565	0.438111
TCGA-YJ-A8SW-01A	0.113327	0.115464	0.173728	0.104811	0.079576	0.477564
TCGA-YL-A8HJ-01A	0.0720708	0.171338	0.178967	0.139326	0.0869971	0.516078
TCGA-YL-A8HK-01A	0.0688999	0.169536	0.157324	0.139438	0.0741214	0.501982
TCGA-YL-A8HL-01A	0.0552772	0.0880498	0.147747	0.109943	0.0370197	0.398111
TCGA-YL-A8HM-01A	0.0988812	0.0855566	0.207491	0.123699	0.02673	0.490785
TCGA-YL-A8HO-01A	0.131847	0.147373	0.207996	0.132073	0.224827	0.627522
TCGA-YL-A8S8-01A	0.0484216	0.129777	0.110256	0.117986	0.0268699	0.438463
TCGA-YL-A8S9-01A	0.0653116	0.0580184	0.138877	0.0960995	0	0.358655
TCGA-YL-A8SA-01A	0.051129	0.115692	0.0986703	0.105432	0.0270958	0.365956
TCGA-YL-A8SB-01A	0.0763243	0.145649	0.180424	0.126558	0.104559	0.449796
TCGA-YL-A8SC-01A	0.0512504	0.147763	0.139897	0.1485	0.0504881	0.505597
TCGA-YL-A8SI-01A	0.0441843	0.140479	0.193236	0.134438	0.089849	0.537106
TCGA-YL-A9WH-01A	0.0289606	0.112312	0.102728	0.104195	0.0447381	0.513232
TCGA-YL-A9WI-01A	0.0711882	0.116898	0.098321	0.0962093	0.0444421	0.397119
TCGA-YL-A9WJ-01A	0.040015	0.142828	0.172039	0.177479	0.0446418	0.572703
TCGA-YL-A9WK-01A	0.0846071	0.127125	0.171166	0.117187	0.0610933	0.50718
TCGA-YL-A9WL-01A	0.0519001	0.109439	0.114504	0.103491	0	0.375885
TCGA-YL-A9WX-01A	0.080421	0.164025	0.226473	0.168918	0.122305	0.509253
TCGA-YL-A9WY-01A	0.163279	0.193178	0.228967	0.154798	0.184767	0.613507
TCGA-ZG-A8QW-01A	0.0956622	0.152035	0.203043	0.14363	0.110672	0.523116
TCGA-ZG-A8QX-01A	0.106115	0.113305	0.17458	0.121873	0.0227655	0.46767
TCGA-ZG-A8QY-01A	0.0702468	0.110188	0.164489	0.122658	0.0358501	0.427703
TCGA-ZG-A8QZ-01A	0.0643739	0.138535	0.197812	0.152721	0.0581377	0.554826
TCGA-ZG-A9KY-01A	0.116486	0.144102	0.249934	0.129247	0.0188534	0.482194
TCGA-ZG-A9L0-01A	0.0566209	0.160579	0.201381	0.168312	0.0955428	0.58806
TCGA-ZG-A9L1-01A	0.0765546	0.0822759	0.145153	0.106385	0	0.451445
TCGA-ZG-A9L2-01A	0.142221	0.176275	0.202427	0.126605	0.0478638	0.670787
TCGA-ZG-A9L4-01A	0.0410974	0.096073	0.221228	0.14794	0.0256829	0.586584
TCGA-ZG-A9L5-01A	0.0778162	0.0888791	0.138539	0.0972368	0.0041336	0.417215
TCGA-ZG-A9L6-01A	0.0710413	0.153579	0.22805	0.139907	0.171115	0.46812
TCGA-ZG-A9L9-01A	0.0980153	0.134423	0.176377	0.125358	0.0491355	0.577981
TCGA-ZG-A9LB-01A	0.00746997	0.108483	0.152489	0.126301	0	0.507239
TCGA-ZG-A9LM-01A	0.0662654	0.152665	0.16106	0.133672	0.096782	0.395263
TCGA-ZG-A9LN-01A	0.172646	0.237652	0.292483	0.17372	0.0253644	0.762565
TCGA-ZG-A9LS-01A	0.116139	0.257337	0.203754	0.138807	0.114507	0.618273
TCGA-ZG-A9LU-01A	0.0597815	0.163725	0.163391	0.160459	0.079285	0.509403
TCGA-ZG-A9LY-01A	0.101786	0.125739	0.174567	0.125086	0.0959472	0.490467
TCGA-ZG-A9LZ-01A	0.0664439	0.104084	0.163864	0.137431	0.00685171	0.490408
TCGA-ZG-A9M4-01A	0.0576359	0.14032	0.361109	0.145692	0.0873127	0.645735
TCGA-ZG-A9MC-01A	0.121549	0.325593	0.264557	0.27611	0.111594	0.765898
TCGA-ZG-A9N3-01A	0.199994	0.152862	0.204829	0.159399	0.00965553	0.527123
TCGA-ZG-A9ND-01A	0.0592407	0.0731575	0.177027	0.12407	0.0119986	0.431345
TCGA-ZG-A9NI-01A	0.0640297	0.103221	0.153713	0.120168	0.0233968	0.506976

## Sheet: xcell_res
sample	aDC	Adipocytes	Astrocytes	B_cells	Basophils	CD4+_memory_T_cells	CD4+_naive_T_cells	CD4+_T_cells	CD4+_Tcm	CD4+_Tem	CD8+_naive_T_cells	CD8+_T_cells	CD8+_Tcm	CD8+_Tem	cDC	Chondrocytes	Class_switched_memory_B_cells	CLP	CMP	DC	Endothelial_cells	Eosinophils	Epithelial_cells	Erythrocytes	Fibroblasts	GMP	Hepatocytes	HSC	iDC	Keratinocytes	ly_Endothelial_cells	Macrophages	Macrophages_M1	Macrophages_M2	Mast_cells	Megakaryocytes	Melanocytes	Memory_B_cells	MEP	Mesangial_cells	Monocytes	MPP	MSC	mv_Endothelial_cells	Myocytes	naive_B_cells	Neurons	Neutrophils	NK_cells
TCGA-2A-A8VL-01A	0.00788184	0	0.0109546	0.00124565	0.00187353	0.00159971	2.33351e-18	8.43461e-20	0.0193257	0.0191129	0.00174756	0	0.0250577	0	0.0121098	0.0175726	3.20265e-20	0.0154927	4.94428e-19	0.00127304	0.0181375	0.00201878	0.0381238	0	0.0523411	0	0	0.0792946	0.0400565	0.010575	0.0146579	0.000540643	5.20184e-19	0.00396577	0.00662189	0.00127674	0.00611825	2.48313e-18	0.0183603	0.0111695	0	0	0.0866976	0.0240946	0.00538918	1.16847e-18	0.008412	0	1.09824e-18
TCGA-2A-A8VO-01A	0.0950353	0.000961246	0.0184294	4.47049e-19	0.0283354	0.00103982	0	3.65745e-19	0.021404	0.0284441	0.00692192	1.98324e-19	0.00825046	0	0.0139553	0.0180567	0.00428018	0.00271252	1.05618e-20	0	0.0181598	0	0.0281779	9.22924e-20	0.106616	0	1.30474e-18	0.100323	7.96914e-20	0.000302602	0.0151285	0.00477785	0.00110576	0.00427028	0.00480563	0.00340538	0	0	0.0427503	0	6.0275e-19	0	0.104632	0.0224133	0.122572	0	0.00274073	0	0
TCGA-2A-A8VT-01A	0.0855439	3.40777e-20	3.74778e-18	1.04127e-18	0.0100122	0.00277037	4.77746e-18	1.74497e-19	0.0505304	0.015252	0.00456234	0.0149335	0.0269614	0	0.00757861	0.0305977	0.0228376	0.00236593	0	0.00530221	0.00928451	0.00317482	0.0480888	0	3.44117e-18	0	2.66946e-05	0.0960814	0.0376177	0.00782775	0.00195523	0.00417085	0.00132693	0.0047751	0.0131639	0.00117538	0.00248922	0	0.0323584	0.00445137	0	3.08775e-19	0.0520757	0.0127812	0.00111397	0	0.00446387	0	2.93338e-18
TCGA-2A-A8VV-01A	0.00274355	9.49513e-20	0.0284715	1.29963e-19	6.84467e-19	0.00332145	0	2.18349e-18	0.0142231	0.0137158	0.000214281	2.77625e-20	0.0154677	2.32677e-19	0.011076	0.0339474	0.0119357	0.0158999	0	0.00287117	0.0235706	0.002629	0.030923	0	0.0645415	3.97007e-18	2.08866e-19	0.0850871	0.0827852	0.0024296	0.00636099	0	8.91214e-20	0.000578412	0.00305202	0.00482157	0.0012254	3.33902e-18	0.0443762	0.0171921	0	0	0.0958728	0.0193754	0.00924062	4.18056e-18	0.00793015	0	0
TCGA-2A-A8VX-01A	0.0129166	1.54055e-19	0	0.00499171	0.0413895	0.00570414	0	0	0.0311309	0	0.0023421	0	0.00692627	0	0.00693609	3.47345e-19	0.0108411	0.0110847	7.09308e-19	2.28125e-20	0	0	0.010506	4.23303e-19	0.061029	0	0	0.0528266	0.0142938	0	2.15361e-20	1.03392e-18	2.82718e-19	8.64271e-22	0.0106489	0	0.00132651	0	0.0217793	0	0	1.13954e-17	0.136761	0	0.0107425	0	0.00305947	1.40993e-18	0
TCGA-2A-A8W1-01A	0.046726	1.16649e-19	0	0.00652791	0.0516332	0.00985383	0	2.74158e-19	0.019599	0	0.00574272	0	0.0328049	4.48875e-18	0.0137138	0	0.00643963	0.0155965	9.01465e-19	0.00348471	0	0	0.0170539	0	0.0168467	7.9144e-19	0	0	0.0305766	0.00159011	0.000737788	0.0107894	0	0.0181175	0.0137726	0	0.00218338	0	0.0346362	0	2.31507e-18	0	0.0308383	0.00256057	0.00268213	0	0.00278505	9.47119e-20	0
TCGA-2A-A8W3-01A	0.0974954	0.000228807	0.0208115	3.73093e-19	0.0272034	0.00565362	8.33922e-19	3.72316e-19	0.0158191	0.0128925	0.000380623	5.98301e-20	0.0112294	0	0.0233638	0.0209153	1.35073e-19	0.0124878	0.00685558	0.00247597	0.0610999	0.00736975	0.0339937	0	0.0530298	0.0153218	0.000702692	0.113427	0.000107203	0.00366658	0.0310262	0	9.74815e-22	0.00392942	0.0167312	0.0022354	0.00456777	0	0.0403676	0.00383242	0	5.14743e-19	0.0415082	0.0413748	0.00350031	2.41333e-18	0.0025881	0	0
TCGA-2A-AAYF-01A	0.0568257	2.02084e-19	0	3.60591e-20	0.047892	0.00289574	0	0	0.0186729	0.0206952	6.2598e-19	2.20891e-19	0.0159072	7.11778e-18	0.0324642	0	0.0152084	0.00139221	0.00267738	0.000862833	0.0106323	1.16337e-18	0.0238872	1.85765e-19	0.033073	1.10792e-18	0	0.0570566	0.0166112	0.00116853	0.00779433	0.00311099	4.10398e-20	0.00414174	0.0104858	0.00130358	0.000696364	0	0.0393191	0	0	0	0.165998	0.0151045	0.00400506	2.67054e-19	0.00220632	1.18216e-19	0
TCGA-2A-AAYO-01A	0.268123	0.00273129	0.0203237	0.196838	0.0316351	0.0124956	0.01346	9.58827e-19	0.0180316	0.0250429	3.92555e-20	0.00922284	0.0750632	0	0.0543774	0.00549114	0.0360601	0.00477994	0.0171742	0.0175889	0.0374863	5.79856e-21	0.0128734	0	0.154645	0.0290645	6.46478e-19	0.16663	0.128861	0	0.0196725	0.0121404	0.00968799	0.00940803	0.0258545	0.00746056	0	0.0717357	0.0471652	0.00265028	0.00779378	0	0.147053	0.0293757	0.020669	0.00810453	0.0038045	2.42973e-19	0
TCGA-2A-AAYU-01A	0.0168214	0	0	0	0.0356622	0	0	9.88968e-21	0.016194	0.0105319	3.26995e-20	7.84881e-19	0.0079682	0	0.0183989	0.0313949	0.0153274	0.00886256	0	0.00490054	0.00450443	0.00961444	0.028876	0	0.0751049	6.22861e-18	6.75703e-19	0.0631742	0.0678098	0.000117752	0.00206286	0.000444101	2.09092e-20	0.00366111	0.00678008	0.000445133	0.00185436	0	0.043227	0.00915995	0	6.39973e-19	0.0749981	0.00838488	0.0286889	8.42614e-19	0.0093915	0	0
TCGA-4L-AA1F-01A	0.344719	0.00606215	0.346308	0.0792466	1.72156e-17	0.0111059	0.0077448	4.69722e-18	0	0.0439243	2.8166e-19	3.78301e-22	0.0546601	1.11902e-18	0.0826402	0.149058	1.4298e-19	0.00578549	0	0.0302184	0.172546	0	0.0195446	0	0.137436	0.0220387	0	0.349769	0.226638	0.00075704	0.0922083	0.0713506	0.030766	0.0511989	0	0.00370043	0.00528133	0.0241867	0.00563046	0.0288241	0.00207033	2.83852e-19	0.164055	0.0912668	0	0.000555968	0.00676215	0	0
TCGA-CH-5737-01A	0.0676505	0	0	0.00332345	0.0311232	0.00102551	0	0	0.00290944	0.0217292	2.30132e-19	0	0.0187253	0	0.0220509	5.52277e-18	0.0238021	0.00215649	0	0.0022359	0.0451527	2.79777e-20	0.0441819	9.28127e-20	0	0	1.41045e-20	0.0321876	0.00784761	0.00776854	0.0255363	0.00345142	0	0.00512157	0.00479006	0.00399704	0.0038133	1.65468e-18	0.0206255	0.00443564	0	0	0.058265	0.0324948	0.00205017	1.59967e-18	0.00347341	0.000235577	7.16763e-18
TCGA-CH-5738-01A	0.174121	9.90325e-19	0.0701783	0.0292642	0.0239512	0.0131334	0	0	0.000702779	0.0325225	4.16832e-20	0	0.0252858	2.70489e-19	0.171443	0.0337726	0.0319297	0.00169358	2.2942e-20	0.0249293	0.0127487	0.00338326	0.0458044	0	0.087008	0.0390039	0	0.0511129	0.252802	0.0111658	0.00708379	0.0167734	0.0126197	0.0146296	0.00966518	0.00279081	4.51333e-19	1.30363e-18	0.00848105	0.0353674	0.0410385	3.19351e-18	0	0.0106639	0.0010339	2.98844e-19	0.00430665	0.00188244	9.65079e-20
TCGA-CH-5739-01A	0.156735	0	0.0591528	4.47467e-18	0.00709139	0.0178798	7.80851e-19	0	0	1.65314e-18	7.66668e-22	0	0.0358237	0	0.0449495	0.0899776	0.0214435	0.00822807	0	0.0123961	0.0283734	0.00249512	0.0203545	1.40597e-21	0.0718612	0.00995849	0.000575743	0.160028	0.0941775	0.000843208	0.0117283	0.0103976	0.00203705	0.0101018	0.00945975	0.00511826	0.00196282	0	0.0205236	0.0135026	0.000827509	2.28571e-19	0.01776	0.0171916	0.00666837	0	0.00387875	0.0012395	0
TCGA-CH-5740-01A	0.12533	2.64834e-20	1.24035e-18	0.00510269	1.47713e-19	0.0142827	8.79456e-19	0	9.69859e-20	0.00679883	0.000299523	0.00480193	0.0412093	0	0.0251923	0.0386751	0.0150227	0.0131509	4.50129e-19	0.0066979	6.99109e-22	0.000283518	0.0374881	0	1.5702e-18	0	6.77838e-20	0.0922791	0.0258808	0.00450966	0	0.00377626	0	0.00405324	0.00747757	0.000654454	0.00390323	0	0.0462752	0.000925007	0	1.15898e-19	0.0338543	0.000885887	0.00132251	0	0.0113252	0	0
TCGA-CH-5741-01A	0.0158922	0	0	1.95569e-19	0.0326908	0.00316517	2.20879e-18	0	0.0103382	0.00604321	7.03962e-05	0.0075578	0.036429	1.63361e-18	0.0339884	0.00995172	0.0303075	0.0109198	0	0.00681877	0.0265049	0	0.0303122	0	0.0245337	2.04261e-21	0	0.0565405	0.104779	0.00349197	0.011032	0.00623088	0	0.0266073	0.0182468	0.00424277	0.000496759	0	0.0426756	0.0148328	2.71588e-18	0	1.18928e-17	0.0223902	0.00548237	1.61322e-18	0.00863559	0.000439436	4.4953e-18
TCGA-CH-5743-01A	0.196266	4.65555e-19	0.0510375	0.0238712	0.0338507	0.0102489	0.00640777	5.86332e-20	0.00640724	0.01294	0.00280481	0.0245317	0.0612476	1.27121e-18	0.134872	0.0124904	0.0133501	0.00996191	7.38345e-20	0.0118999	0.00333487	0	0.0979425	0	0.00937433	0.000600265	0	0.0675755	0.0127416	0.0756653	0.00439507	1.0738e-21	0.00115572	0.00121638	0.00644981	0.00189827	0	0.00581063	0.0033862	0.0307516	0.00857477	2.65574e-19	1.43578e-17	0.00749482	1.32584e-20	0.00406779	0.00544417	0.00329678	0
TCGA-CH-5744-01A	0.0858714	0	0.00732032	4.81995e-19	0.0372282	0	1.50075e-19	1.45675e-18	0.0277731	0.0390603	3.37638e-20	0	0.0200168	2.39674e-18	0.0830517	0.0206701	0.00344998	0.00268371	0	0.0181946	0.0341283	0.0232565	0.0594758	4.82025e-20	0.0130401	6.17974e-19	0.000748929	0.0663805	0.261469	0.01193	0.0215822	0.00477593	1.22264e-19	0.0125062	0.00822942	0.00183667	0.00779028	0	0.035475	0.0238556	6.82251e-19	2.79355e-19	0.0699327	0.0382344	0.0037787	1.5806e-18	0.00674255	3.47249e-19	5.07725e-18
TCGA-CH-5745-01A	0.188264	0	0.0939858	0.0103242	0.0248921	0.00978835	8.11027e-19	1.90285e-20	0.00778539	0.0246496	1.761e-19	0.00210685	0.053379	0	0.0390929	0.0351658	0.0211662	0.000427899	0.00203013	0.0102186	0.0167426	0.00556233	0.0398718	0	0.0899098	0.008456	0.00204847	0.0801529	0.0289478	0.00632677	0.00637627	0.00384453	0.00186087	0.0124035	0.00789156	0.0030814	3.6012e-20	2.12078e-18	0.0164308	0.0431704	0.00677299	3.15368e-18	0	0.0127022	0.000952226	0	0.00574499	0.000215562	0
TCGA-CH-5746-01A	0.00791583	0	0.014109	0.000912524	0.0110128	0.0070149	1.00259e-18	0	0.0186314	0.0037824	0.000237228	0	0.0194479	0	0.0384345	0.0176529	0.0103703	0.0138231	0	0.00291565	1.37882e-20	0.00116657	0.0554624	0	0.0118512	0	0	0.0385218	0.0597521	0.0148056	0.000381862	0.000880492	3.00488e-19	0.00151278	0.00972354	0.000224623	3.38187e-19	0	0.0238915	0.00740219	0	0	2.88582e-18	0.000227955	0.00559552	0	0.00509411	0	3.0846e-19
TCGA-CH-5748-01A	0.0678035	0	2.41345e-20	0.0239936	0.0135825	0.0120634	9.74241e-20	0	0.0120816	0.0113765	2.29233e-19	0.00250118	0.0331874	0	0.0384324	0	0.0187085	0.0132785	0	0.00464177	0.00366368	0	0.028956	6.71656e-21	0.024877	1.12852e-19	3.95581e-19	0.00546759	0.0331399	0.00423632	0.000447981	0.00184561	0	0.0023002	0.0135427	0.00041597	0	0	0.0143552	7.55547e-19	0	2.68485e-18	0	0.001493	0.00431488	6.7457e-19	0.00251178	3.58161e-21	6.3373e-18
TCGA-CH-5750-01A	0.237581	0	0.0211913	0.119102	0.0196581	0.0306827	0	2.70418e-20	0.0148501	0.0101581	0	0.0275811	0.0840394	5.63685e-19	0.0360332	1.23542e-20	0.0387719	0.00691319	0	0.01152	0.0123957	0.00171674	0.0253137	0	0.0272414	0.00242668	2.07944e-18	0.0316939	0.00925756	0.00259923	0.00358971	0.00597361	0.00216554	0.0107075	0.00902371	0.00293023	0.00332527	0.025881	0.0135382	0	0.00321165	0	0	0.00933894	0.00215056	0.0157379	0.00256279	1.23498e-19	0
TCGA-CH-5751-01A	0.380999	0.000580936	0.0353427	0.351401	0.0310142	0.0811903	0.0492671	0.0132672	0	0	0.00881252	0.115344	0.24305	0	0.0929369	0.0184604	0.0961098	0.00168438	3.01976e-19	0.0310095	0.0554228	7.73125e-19	8.88535e-21	0	0.0494338	0.00604817	0.00101608	0.166583	0.137436	0	0.0184418	0.0136561	0.0194855	0.00700752	0.023126	0.00407644	0.000820699	0.101249	0.00644682	0.00715025	0.004061	4.40818e-18	0.00381356	0.0314517	0.00143152	0.0490172	0.00297756	0	0
TCGA-CH-5752-01A	0.0889576	0	0	0	0.00899726	0.0136693	5.34549e-20	2.64346e-19	0	0	0	1.79439e-19	0.0119548	3.41014e-19	0.0104717	0.0645034	0.000207215	0.0269159	5.4023e-19	0.00268764	0.0652539	0	0.00134843	2.57978e-19	2.05799e-18	0	1.02217e-18	0.135678	0.0195929	0	0.0189248	0.00142662	3.60127e-19	0.0053533	0.0102881	0.000490433	0	4.67842e-18	0.0384742	9.46926e-19	4.08806e-18	0	0	0.0383001	0.00771355	0	0.00614788	0	0
TCGA-CH-5753-01A	0.162057	3.31164e-19	7.60049e-18	0.0286356	0.0376674	0.0239742	1.07316e-18	0.00122401	0.0223407	2.907e-19	0	0	0.0420841	2.92838e-18	0.0162828	0	0.0220493	0.012189	9.37042e-20	0.00947861	9.50924e-20	0.00279459	0.0396944	0	0.00684027	0.0011688	3.19776e-19	0.0112823	0.038383	0.006099	0	0.00520455	4.66047e-05	0.00652607	0.0127738	0	4.02694e-20	1.56315e-18	0.00302935	0	0	0	1.34745e-18	6.35108e-20	0.00324449	0.00289213	0.00322283	0.000516793	7.26269e-19
TCGA-CH-5754-01A	0.284011	0	0.0521513	0.0366842	0	0.0162286	0	0	0.0124845	0.0328934	0	0.0274901	0.081855	0	0.0622712	0.0408227	0.0159884	0.00519216	7.34127e-21	0.0245446	0.122782	0.0056371	0.0486662	0	0	0.00312643	0.00025722	0.125882	0.196291	0.00763124	0.0570615	0.0117226	0.0130686	0.00873864	0.00353046	0.00416342	0.00453564	0.00761744	0.0428962	0.0560043	1.16636e-19	4.05324e-20	0.0551784	0.0864004	0	7.49393e-19	0.00244411	2.8531e-19	0
TCGA-CH-5761-01A	0.0779174	0	0.0681657	2.10964e-18	0.00960331	0.0138399	2.92739e-18	0	6.93177e-19	0	3.02312e-20	1.68799e-18	0.0205749	1.48369e-18	0.0106673	0.0319024	0	0.0182498	0	0.00526409	0.0673281	0.00438899	0.0125946	0.000326971	0.00109229	2.13956e-19	0.000510298	0.113113	0.0443148	0.00128633	0.022672	0.00611428	0.00206679	0.0180113	0.016436	8.77185e-21	0.00279575	0	0.0390457	0.0110179	1.69584e-18	2.62437e-19	0.0947705	0.0373678	0.00269194	0	0.00173213	0	0
TCGA-CH-5762-01A	0.235282	6.35884e-19	0.0457892	0.0575725	0.0148847	0.0234755	0	0.00335061	0.00435661	0.0174621	2.26415e-21	0.0148803	0.056483	0	0.0957353	0.0371057	0.041248	0.00909051	7.68818e-21	0.0144255	0.00914312	0.00221141	0.0408263	0	0.0712574	0.0205029	1.03387e-18	0.0821129	0.0278461	0.0118833	0.00429119	2.09368e-20	0.000715248	0.00212606	0.0111934	0.000684673	0	0.00363539	0.0110897	0.0147187	0.00281131	0	7.49142e-19	0.00754509	0.00639877	0.00630233	0.0044643	0.000762347	0
TCGA-CH-5763-01A	0.122953	0	0.094506	0	1.81258e-18	0.00564972	1.80756e-18	0	4.87372e-19	0	1.00712e-22	0	0.0240095	0	0.0418152	0.0481163	0	0.0105725	0	0.00522226	0.0124221	0.00108373	0.0448338	0	0.125065	0.0113115	0.000233038	0.127791	0.0292366	0.0269823	0.00854848	0.000889834	0.000542588	0.00286934	2.68775e-05	0.00568548	2.85277e-19	2.81671e-18	0.000444887	0.0521047	0.00299077	1.22569e-21	0	0.00591568	0.00247001	5.86077e-19	0.0103018	0.00350561	4.49263e-18
TCGA-CH-5764-01A	0.102075	1.12854e-19	0.0101702	1.40907e-19	0.0224664	0.0215297	1.48599e-18	0	4.91392e-20	7.99994e-19	0.000813842	0.00345729	0.0489104	0	0.0410639	0.0341964	0.0044876	0.0189115	0	0.00498069	0.0133953	0	0.0426307	0	0.0436484	0.00431951	0	0.0695461	0.0232128	0.00651923	0.00489099	0.0026947	0	0.00276893	0.00978255	0.00208754	2.22145e-19	6.39077e-19	0.0267418	0.00567434	0	7.23322e-20	0	0.00965753	0.00785298	6.78052e-20	0.00532908	0.00179334	6.19596e-18
TCGA-CH-5765-01A	0.0154559	0	6.57945e-19	9.59271e-21	0.00802717	0.00661864	1.49042e-19	3.13912e-19	0.00198875	1.0345e-18	0.00106092	0	0.0116273	3.93072e-18	0.0203666	0.0204434	0.0134992	0.0100075	0.000785003	0.00343357	0.0170317	0.00171832	0.0262804	0	0.0319374	3.93545e-19	8.04637e-19	0.0890593	0.073232	0.00261032	0.007583	0.00273214	1.45425e-19	0.00349889	0.0150969	0.00218992	0.000971702	2.4024e-18	0.0328908	4.51352e-20	0	2.4417e-19	0.0166398	0.0177104	0.0068575	6.68027e-19	0.00843878	1.84129e-20	0
TCGA-CH-5766-01A	0.121365	1.70363e-19	0	0.0284463	0.0472684	0.0243163	7.86213e-19	5.55003e-20	0.0254206	0.0179069	0	0.00716373	0.0365238	0	0.0624048	0.0188489	0.0178237	0.00369666	0.00172457	0.024301	0.00314727	0.00500337	0.0498405	2.04145e-21	0.0295797	1.62029e-18	9.86817e-19	0.0447033	0.208381	0.0108033	0.00278025	0	0.000201572	0.00355166	0.0151262	0.000940323	9.77589e-06	1.1023e-19	0.0191665	0.00520515	0	0	0	0.00874458	0.00180867	0.0031023	0.00520242	0	0
TCGA-CH-5767-01A	0.0328569	0	0	0.0040539	0.0531003	0.00346832	0	6.22032e-19	0.0105579	8.52715e-19	0	1.40816e-18	0.00793203	0	0.0114155	2.67827e-18	0.00486055	0.00783924	3.46929e-20	0.00213237	0.0103872	0	0.0189606	0	0.0955393	2.39097e-18	0	0.00554321	0.0257311	0	0.00655538	0.00124776	4.51085e-20	0.00440849	0.00625911	0.00194671	0.00266273	1.44026e-18	0.00944152	0	8.87265e-19	0	0.0549617	0.0124961	0.00605994	2.63014e-19	0.00303352	0	1.33953e-18
TCGA-CH-5768-01A	0.0531462	9.80316e-21	3.73049e-19	0.00907039	0.00709181	0.00886186	1.07284e-18	0	0.00918182	0.0128036	0	3.60663e-20	0.026207	0	0.0316291	0.0238887	0.010736	0.0116387	0	0.00705045	0	0	0.0394585	0	0.0049144	0	4.50863e-19	0.0363155	0.0542478	0.00659888	0	0.00722323	0.00119536	0.00554225	0.00962181	6.68024e-20	0.00107924	1.08319e-19	0.0397206	1.62504e-18	3.76277e-19	0	0.00339147	0.000736267	0.00364681	0	0.00354505	0	1.49875e-18
TCGA-CH-5769-01A	0.101277	0.000633199	0.0818779	3.33287e-19	0.00206011	0.00768657	6.6723e-20	1.18847e-18	0	0.00618691	2.78719e-19	0	0.0190791	0	0.0699558	0.0518595	0.000468201	0.00865892	0	0.0162623	0.0143035	0.00797338	0.0528395	0	0.00761645	0	0	0.125645	0.131241	0.00938577	0.00396677	0.000427807	3.96266e-20	0.000916955	0.00226578	0.00175022	0.00127031	0	0.042023	0.0408614	0	0	0.0589007	0.0140254	0.00229053	2.10342e-18	0.00620636	0	0
TCGA-CH-5771-01A	0.241085	0.00255628	0.143434	1.63712e-21	9.54599e-19	1.25851e-20	9.79136e-20	1.24992e-19	0	0.0216588	0	0	0.0179765	0	0.121943	0.0799381	0.00222665	0.00528197	1.30197e-19	0.0234311	0.0440582	0.00403084	0.0578249	0	0.156223	0.00642608	5.4929e-20	0.153629	0.106957	0.0162916	0.0194646	0.012404	0.0124831	0.00887463	0.00247438	0.00581548	0.000484475	0	0.0147497	0.0521088	0.0150628	5.65535e-19	0.00365127	0.0345442	0.00813709	0	0.00661605	2.36745e-20	0
TCGA-CH-5772-01A	0.0908252	0	7.04359e-18	4.58574e-18	0.00334566	0.0103442	0	0	1.04931e-18	5.84718e-18	2.801e-19	7.50214e-19	0.0320247	1.39351e-18	0.0287409	0.0269779	7.15012e-18	0.00922067	0.00504589	0.00215603	0.0811267	3.30353e-19	0.00544343	8.76271e-20	0.101389	0.0358978	0.00165971	0.208656	0.0352677	0	0.0396925	0.00528123	0.000540958	0.00720841	0.0196527	0.0156929	0	2.64578e-17	0.0188641	0	1.07981e-18	5.46225e-19	1.39815e-17	0.041637	0.00707291	0	0.00892038	3.435e-22	0
TCGA-CH-5788-01A	0.0620709	0	0.00496713	0.00866453	0.0200724	0.0153015	2.72675e-18	0	9.50063e-19	0	0	0	0.0187974	0	0.024764	0.0151325	0.00841434	0.00775489	1.24424e-19	0.00543037	0.000852745	5.08547e-20	0.0156058	7.08546e-05	0.0119061	0.000697926	0	0.0283573	0.0457254	0.000259445	2.00005e-20	0.00456271	0.00124186	0.00421488	0.00926802	0	0.00968133	0	0.0315922	0.0117619	7.95841e-19	1.52188e-18	0.0599061	0.000820481	0.00253168	0	0.00234701	0	0
TCGA-CH-5789-01A	0.0969779	0	0.0351422	2.56819e-21	0.00818189	0.0050133	3.84797e-19	1.38687e-18	3.31988e-19	0.00107614	2.17749e-19	2.6707e-19	0.0223976	0	0.086646	0.0240426	0.00885337	0.00560347	5.49398e-05	0.01156	0.0192662	0.00523656	0.0355385	0	0.0535724	0.0260237	1.2236e-19	0.075599	0.0691948	0.0140285	0.0110839	0.00398382	0.00151685	0.00824457	0.0146535	0.00220397	0	0	4.25475e-05	0.00883932	0.0214263	0	0	0.0117776	0.00566879	0	0.00490261	0.00223357	0
TCGA-CH-5790-01A	0.0380854	0	0	0.00412024	0.0422548	0.0090716	3.98005e-19	0	0.0165788	0.0154918	0	2.54212e-19	0.0186172	0	0.0335757	0.0157504	0.0177769	0.00917642	2.22273e-19	0.00433416	0.00537665	0.000202512	0.045703	9.27735e-20	0.0238592	0	3.93541e-19	0.0398532	0.0520372	0.00576597	5.42101e-20	0.0141399	1.81516e-19	0.0136981	0.0121623	0.0014114	0.00790759	0	0.0110927	0.00947035	0.000820325	3.68784e-18	0	0.00617319	0.00605267	5.05846e-19	0.00451466	9.51703e-05	0
TCGA-CH-5791-01A	0.117861	0	0.00701473	0	0.0380817	0.000917857	5.81475e-20	6.66177e-19	0.00225846	0.00449164	0	0	0.0126498	1.33963e-18	0.0550679	0.0354401	0.0202663	0.00777334	0.00724099	0.0116423	0.00612312	0	0.0527679	1.12757e-20	0.0551583	0.00191744	2.68707e-19	0.0855428	0.0890311	0.00907756	0.000813849	0.00345543	0	0.00368303	0.010299	0.00123275	0.0053104	4.14565e-19	0.0309567	0.010533	3.22554e-20	4.61366e-19	0.053301	0.00497713	0.00787594	1.12629e-18	0.00552331	0.000618998	0
TCGA-CH-5792-01A	0.248485	0	0.0985551	0.0245185	1.34337e-19	0.00322177	0.00153254	9.48478e-19	0	0.044029	1.5254e-19	0	0.0331263	3.21783e-21	0.130619	0.0496894	0.031234	0.00235784	6.60293e-20	0.0196163	0.0619309	0.000338163	0.0528002	0	0.0772506	0.0115463	0.00168556	0.139039	0.157252	0.0115921	0.0218422	0.00986102	0.0127993	0.00565713	0.00924237	0.0125853	0.000790291	0.00151706	0.0157543	0.0289448	0.0248832	2.84692e-19	0.101351	0.0422278	0.00396346	0	0.00511853	6.44477e-22	1.88623e-18
TCGA-CH-5794-01A	0.105039	3.05678e-20	0.0139062	0	0.053845	1.76506e-20	0	0	0.00628348	0.00884975	2.00305e-20	3.49138e-19	0.016494	0	0.0242936	0.0133938	0.0233326	0.0111485	1.68523e-19	0.00695904	0.0124374	0.00973473	0.0550706	3.40815e-19	2.33783e-19	0	0	0.0494598	0.0303954	0.00924195	0.00211018	0.00240999	3.73714e-20	0.00370448	0.00508198	0.00129015	0.00335681	8.70316e-18	0.0446103	0.0171496	0	0	0.0295517	0.0150478	0.00555574	0	0.00987733	0	0
TCGA-EJ-5494-01A	0.113718	0	1.55789e-18	8.39312e-19	0.0217752	0.00989116	0	0	0	0.0339078	2.31e-19	0	0.0301411	0	0.0606852	0.0201877	0.015572	0.0042596	0.00976476	0.00710302	0.0426158	6.88479e-20	0.0322212	2.22192e-20	0.0958532	0.0181329	0.00221357	0.128106	0.0727416	0.0148151	0.0239261	0.00338518	0.00468256	0.00344636	0.0171291	0.00435847	0.000979523	1.08348e-19	0.0327349	0.00713495	1.71207e-18	5.52865e-19	0.00451893	0.0341932	0.00151835	2.26822e-18	0.00969817	0	0
TCGA-EJ-5495-01A	0.227206	1.22172e-18	0.082722	4.66906e-18	0	0.0151755	0	4.83565e-18	1.81211e-19	0	0	0	0.0411048	1.06471e-17	0.0935457	0.0988027	1.09802e-18	0.00875085	5.69973e-20	0.0167206	0.0952137	1.59141e-18	0.0379568	0	0.0470661	0.026948	0	0.326992	0.117175	0.00618837	0.0274649	0.00320962	0.00691223	0.00317058	2.36721e-19	0.00683187	7.7699e-18	0	0.0203732	0.0261873	4.73483e-18	0	1.25645e-17	0.0365864	0.000193076	5.74474e-18	0.00788018	2.95649e-18	9.83878e-18
TCGA-EJ-5496-01A	0.025462	1.44484e-19	4.55125e-18	0	0.0164745	0.0117064	5.10364e-19	6.07258e-19	0	1.80458e-19	0	0.00241891	0.0377225	3.56522e-18	0.031767	0.0151316	0.0109761	0.0132284	1.25475e-19	0.0072317	0.00136585	0	0.0359042	6.02369e-20	0	0	0	0.0484349	0.0735348	0.00775082	0.000479352	0.00250053	0	0.00284534	0.0116033	7.34578e-20	8.34954e-19	5.42434e-18	0.0380462	0.00253106	2.68021e-19	0	0	0.000615083	0.00572309	2.27517e-18	0.00593187	0	7.62547e-19
TCGA-EJ-5497-01A	0.0579647	0	0.0154904	2.01305e-18	4.19354e-18	0.0137537	2.29252e-18	0	5.79275e-20	0.00700355	0	0	0.0447635	0	0.0826152	0.0530817	0.00439382	0.00402623	2.5831e-19	0.00994123	0.0212566	0.00163495	0.0406253	0	0.0534468	0.0302484	2.07407e-20	0.121236	0.0960912	0.00897932	0.00536485	0	0	0.00272137	0.0107809	0.00339789	0	0	0.0220267	0.0149472	7.84226e-19	3.47616e-19	3.43888e-18	0.00934723	0.00615811	5.89948e-19	0.00756558	6.26122e-20	0
TCGA-EJ-5498-01A	0.116198	0	0.0569668	7.82908e-19	1.31924e-17	7.65135e-05	1.0894e-17	0	6.03999e-18	0	0	3.87069e-18	0.0332228	6.45202e-18	0.0507714	0.100348	0	0.00852029	0	0.0036698	0.0576105	3.55594e-19	0.0564573	0	0.111487	0.0170609	0	0.338393	0.0639545	0.0162112	0.0172496	0	0.00442721	0.00226217	0	0.00747937	0	0	0.0136309	0.0247224	6.44251e-18	0	2.36843e-18	0.0266898	0.00759697	0	0.0119398	0	9.57499e-18
TCGA-EJ-5499-01A	0.18338	1.07961e-19	0.0262168	0.00769998	0.00724065	0.0221074	8.99395e-19	0	6.70848e-20	0	0	1.98876e-19	0.0455019	6.41923e-20	0.156268	0.0379593	0.0193761	0.0221031	0	0.0300148	0.0167462	0.000780599	0.0686453	0	0.0234068	0.00998783	1.12325e-19	0.101854	0.188641	0.0200949	0.00240096	0.00729405	1.04909e-19	0.0057151	0.00924031	0.00286419	2.55163e-19	2.84282e-18	0.0624723	0.00854424	0	4.52931e-20	0	0.0130007	0.0010903	1.49304e-18	0.00650813	0.000648852	0
TCGA-EJ-5501-01A	0.0978516	1.49508e-19	0.050288	0	2.35095e-18	0.000330163	7.14673e-19	2.07377e-19	0.00591371	0.0303601	9.20844e-20	0	0.0176157	0	0.0534149	0	0.00691496	0.0056345	0	0.00642149	0.0113708	0.00585042	0.0642368	9.27359e-21	0.0772535	5.56604e-21	3.15945e-19	0.0407757	0.00630622	0.0311235	0.00282984	0.00188734	8.24892e-19	0.00469419	0.00427845	0.00117445	0.00274593	0	0.0258799	0.0210142	6.87792e-19	0	0.0430288	0.0114601	0.00964473	7.7664e-19	0.00673944	1.1605e-18	1.8057e-18
TCGA-EJ-5502-01A	0.184347	1.0922e-19	0.0719029	1.52192e-19	0.0107382	1.21938e-23	1.93955e-18	0	0.010565	0.0211844	0	0	0.019431	0	0.0361912	0.0574372	0.0118509	0.00176827	0	0.00773799	0.026014	0.000810419	0.065661	5.59812e-21	0.0812838	0.00521045	0.00181754	0.122118	0.0125714	0.0187731	0.0121538	0.00625122	0	0.0174156	0.000992263	0.0039847	2.91126e-19	0	0.0107669	0.0306018	0.0137593	0	0	0.0203573	0.130927	7.54088e-19	0.0068805	0.00159293	9.58714e-19
TCGA-EJ-5503-01A	0.13291	0	0.0749722	6.56832e-20	0	0	7.41739e-19	0	0.00946992	0.0222541	3.23505e-19	2.52614e-18	0.0242536	6.78385e-19	0.0655544	0.0399522	0.0105635	0	0.0021652	0.00757102	0.0263616	0.00180539	0.0740595	0	0.0945201	0.00868119	0.000654146	0.167279	0.0208654	0.0215901	0.00815981	0	6.82134e-05	0.000496332	0.00186933	0.00254199	0.00176654	1.59773e-18	0.0262714	0.0325486	0	7.29583e-18	0.0301485	0.0207869	0.0018197	0	0.00485856	0	7.49508e-19
TCGA-EJ-5504-01A	0.0852309	0.00167752	0.0264795	0	0	0.0028017	0	3.66726e-18	9.4178e-19	2.308e-19	0	2.23116e-18	0.0246632	3.50701e-18	0.0458053	0.0785875	8.38803e-18	0.0137635	0	0.00969673	0.049074	0	0.0260178	0	0.124868	0.0144254	8.38425e-20	0.182372	0.141975	0.00253818	0.0127027	0.00664872	0.00482057	0.00635983	0.0069489	0.0102679	0.00102947	0	0.0270033	0.00567634	0.00224083	6.0398e-19	0.00721991	0.0218489	0.00412964	4.8426e-18	0.00788503	0	0
TCGA-EJ-5505-01A	0.024414	0	7.41004e-19	0.00761399	0.0150769	0.00835847	6.18354e-20	0	6.85601e-19	2.86169e-20	0	0	0.0298329	4.52027e-19	0.0196019	3.23476e-19	0.00956642	0.00739307	0.00948022	0.00360151	0.00043016	0	0.0284899	0	0.0486895	0.0330399	0	0.0293923	0.0650079	0.00643309	7.0507e-20	0.00722785	0.00033348	0.00653292	0.0270089	0	0.00029201	0	0.0297565	0	2.29277e-18	0	0	1.87e-19	0.00550041	1.91526e-18	0.00442222	1.92473e-20	4.00386e-18
TCGA-EJ-5506-01A	0.0412685	3.7354e-19	0.00884362	2.17912e-20	0	0.0122602	0	0.00164817	5.65266e-19	0.00794779	3.29482e-21	0.0043524	0.0312486	0	0.0220671	0.00416191	0.000729048	0.0192243	2.63125e-05	0.00380023	0	0.00148852	0.0555635	0	0.0234743	0.00226225	0	0.0611883	0.0176073	0.0275668	5.01535e-19	1.46142e-21	1.7031e-19	0.00123597	0.0139654	1.39055e-20	1.31608e-20	3.06042e-18	0.00102644	0.0230544	0	1.19788e-19	3.03495e-18	5.7588e-19	0.00322335	1.13421e-18	0.00632703	1.55669e-20	0
TCGA-EJ-5507-01A	0.148672	2.55155e-20	0.0277627	0	0.00771775	0.013764	0	0	1.95472e-19	0.0373958	1.72186e-19	0.00929998	0.0615243	0	0.0344175	0.0513295	0.00534136	0.013091	2.85883e-20	0.0101258	0.0176851	0.00355621	0.0311504	0	0.0278338	6.16101e-07	0	0.10366	0.0348771	0.00406985	0.0021511	0.0108039	1.94353e-20	0.00695546	0.0119475	0.00349547	0.00302046	0	0.0236483	0.0020383	0	1.74383e-19	0.0353511	0.0107948	0.00723988	0	0.00730181	0	1.82156e-18
TCGA-EJ-5508-01A	0.191174	0	0.0106797	0.00372513	1.51706e-17	0.0213673	1.09417e-18	0	2.6155e-18	3.47264e-18	1.22236e-19	0.00150075	0.051522	2.99465e-18	0.106679	0.0434231	0.0133809	0.000955144	0	0.0144006	0.0477795	7.00671e-19	0.0380614	0	0.00156316	0.0302673	0	0.169153	0.071649	0.0112763	0.00939194	0.00714105	0.00293447	0.00459955	0.00748514	0.00599696	3.76592e-18	0	0.0179562	0.0230615	4.02628e-18	0	3.24238e-18	0.0156705	0.00529866	0	0.00673919	0	0
TCGA-EJ-5509-01A	0.194567	0	0.0594304	0.0231324	0.00360625	0.00288793	0.00132579	3.4739e-19	0	0.0296438	8.27484e-19	6.27676e-20	0.0354561	5.02922e-19	0.0796115	0.0335841	0.0153771	0.00708839	0.000123983	0.0184067	0.0269558	0.00235867	0.0453032	0	0.0958531	0.00382762	0	0.0632825	0.071398	0.00901114	0.005104	0.0263145	0.0191807	0.0119327	0.00845021	0.0045755	0.00204475	0.00320313	0.0301945	0.0199768	0.00489684	3.97655e-19	0.0730051	0.0123836	0.00390535	0	0.00576759	3.52447e-06	2.3155e-19
TCGA-EJ-5510-01A	0.160178	0	0.033765	0	0.00461838	0.00596306	4.41748e-20	0	0	0.0316326	0	0.00223286	0.0690177	0	0.102556	0.038602	1.89752e-19	0.00983434	0.0031063	0.0145905	0.0182109	0.0165511	0.066325	0	0.0638903	0.0225367	0.000317401	0.128621	0.0609832	0.0219941	0.00454569	0	0	0.00187352	0.0132222	0.00264302	4.21212e-19	2.87417e-18	0.0457922	0.0270373	0	0	0	0.0123843	0.000973834	0	0.00883792	7.00643e-21	7.34325e-18
TCGA-EJ-5511-01A	0.0460283	2.49959e-20	0.0349581	0	1.36888e-19	2.45541e-20	3.29736e-18	1.06478e-19	0.00813694	0	0.00465603	0	0.0140151	0	0.0340529	0.0396537	1.39791e-19	0.00125673	0.00176225	0.00184167	0.0157579	0.00476314	0.0311688	0	0.0837612	0.013036	0.00063915	0.0979992	0.0272264	0.00276316	0.0034273	0.00355168	0	0.00709018	0.0107191	0.00167013	0.00149041	4.1721e-19	0.0184823	0.001695	0	2.47881e-19	0.0576531	0.0112293	0.05719	5.90064e-19	0.00361102	4.5428e-21	3.37053e-18
TCGA-EJ-5512-01A	0.0243093	0	0.027212	9.94311e-21	0.0128236	0.00781175	1.55449e-18	0	0	2.00619e-05	6.68424e-21	0	0.0252039	0	0.0289354	0.0309985	0.00621851	0.0204573	1.43588e-18	0.00279673	0.00290448	0	0.0450583	1.16811e-19	0.0384901	0	1.23976e-18	0.0728576	0.0357499	0.00976686	0.00112241	3.69523e-21	1.01452e-18	0	0.00450787	0.000568481	0	0	0.0261683	0.00899813	0	0	0	0.00141579	0.0086498	4.40305e-19	0.00832717	0	1.29861e-18
TCGA-EJ-5514-01A	0.159641	0.00198859	0.043995	0.00938553	0.019147	0.0182335	0	6.58251e-20	0	0	1.88137e-20	1.57713e-18	0.0307444	2.1269e-18	0.0923258	0.0676212	1.11351e-18	0.0206193	0	0.0173978	0.0236751	3.51377e-19	0.0222778	0	0.0465289	0.0170282	1.85262e-19	0.135485	0.104445	0.00156533	0.00507203	0.0221027	0.010606	0.0248064	0.0282837	0.00261779	0.000675729	9.63054e-19	0.0119661	0.000487308	0.00775491	3.85562e-19	0.00966378	0.00717909	0.0373859	0	0.005899	1.78316e-05	0
TCGA-EJ-5515-01A	0.0327517	1.4399e-19	0.0215225	0.00972794	1.8494e-18	0.00881823	0	0	2.93835e-19	0	8.03799e-20	0.00020494	0.0290977	0	0.0510913	0.00951326	0.00489185	0.0195418	0.000440401	0.00212005	0.00316022	1.23111e-19	0.0267608	0	0.0857446	0.0184399	6.73077e-19	0.0561757	0.024636	0.00930733	5.7202e-21	0.00403367	1.7196e-19	0.00186276	0.0165439	0.000559589	5.04831e-20	0	0.00367172	0.00995489	0.000451158	0	0	1.94506e-19	0.0100307	1.48276e-18	0.00788685	0.000139777	1.01203e-19
TCGA-EJ-5516-01A	0.127674	0	0.0315045	1.03127e-18	1.56436e-17	0.00948867	1.51523e-17	0	4.22223e-18	0	1.50873e-19	2.68835e-18	0.0414352	1.90021e-17	0.0780024	0.0845328	2.30487e-18	0.00523477	4.49894e-19	0.00614499	0.0876705	0	0.0304746	0	0.0230751	0.0363843	0	0.313129	0.0816463	0.00772221	0.0280323	0.00399498	0.00367799	0.00809186	0	0.00834833	4.24097e-20	0	0.0106744	0.0121357	1.17096e-18	0	3.46647e-19	0.0324339	0.00242539	5.42434e-18	0.00972204	0	8.75549e-18
TCGA-EJ-5517-01A	0.176277	1.474e-19	0	0.0485486	0.0131148	0.0316334	2.30623e-18	0	1.16229e-18	0.0112503	5.23482e-20	0.00506277	0.0728355	0	0.0731301	0.0306335	0.00989065	0.0123817	1.44126e-20	0.0113871	0.0184538	0	0.0077076	0	0.189037	0.0281072	0.00244311	0.128457	0.0113779	4.73233e-21	0.00813789	0.00808489	0.00199757	0.00867219	0.0143866	0.00516369	1.34266e-18	0.00548761	0.0204122	0.0111344	1.1144e-18	0	0	0.00818516	0.02207	0.00404017	0.00707758	1.45919e-21	2.39514e-18
TCGA-EJ-5518-01A	0.155731	0	0.0579922	0	0.0110361	8.07914e-20	0	0	6.30908e-23	3.26323e-19	0.000472241	0	0.0104832	5.9991e-18	0.0491179	0.0926069	0	0.00233061	0.00293589	0.00756939	0.123164	9.95922e-19	0.0243232	0	0.0679493	0.0120769	0.00192647	0.270222	0.0625871	0.00182876	0.0610045	0.0191159	0.00896971	0.0113115	0.00566399	0.00860024	0.000654651	0	0.0431466	0	1.66302e-18	9.87929e-19	0.0355577	0.0775342	0.149534	0	0.00359128	0.000220282	0
TCGA-EJ-5519-01A	0.0983718	0	6.9682e-18	0	0.0309442	0	3.93764e-18	2.59562e-18	0.017602	0.0370308	1.8302e-19	7.12475e-19	0.0103064	0	0.0180052	0.0349123	1.57404e-19	0.00447521	0	0.00235412	0.0706216	0.00739307	0.0267766	9.39126e-20	0.0529813	3.6543e-18	0.00042628	0.0958264	0.00785286	0.00332271	0.0260991	0.00645406	4.13223e-20	0.0124187	0.0017039	0.0046375	0.00212328	0	0	0.016585	0	5.47495e-19	0.147826	0.0420831	0.00273283	0	0.00675389	0	0
TCGA-EJ-5521-01A	0.0945948	0	0.0156797	0	0	6.46978e-19	0	0	3.57302e-18	0.012411	0	3.44306e-18	0.0161533	6.26922e-19	0.03785	0.0423071	0.00566147	0.00394519	0	0.0153118	0.0252173	0.00215699	0.0643064	1.08403e-19	0	0	2.09404e-18	0.112103	0.149285	0.0136657	0.0060603	0.0150654	0.00161823	0.0164664	0.0014446	0.00223507	0.00952279	0	0.047334	0.0177661	0	1.57503e-19	0.147659	0.024008	0.00877826	0	0.00749118	0	0
TCGA-EJ-5522-01A	0.104526	0	0.0163366	3.12636e-22	2.27947e-19	0.0219306	0.00175894	0.00128401	2.7867e-21	0.00596436	5.39627e-19	0.0102709	0.0581466	0	0.105801	0.0663767	0.00801165	0.00377436	1.04868e-20	0.0173294	0.00526793	0	0.029557	0	0.0531952	0.0333969	6.65748e-19	0.130087	0.122536	0.00623707	0.000409185	0.00150239	0	0.00317257	0.0130037	0.00275659	1.6226e-18	4.53843e-18	0.0116022	0.0103547	4.13125e-19	2.06427e-19	3.52377e-18	0	0.00701808	0	0.00993836	9.23803e-19	6.0822e-19
TCGA-EJ-5524-01A	0.163518	0	0.032938	0	2.31051e-18	0.0287019	0	0	1.8753e-18	0.0205186	0	0.0100801	0.0740771	3.14711e-19	0.110273	0.103896	0.00526917	0.0094711	1.67092e-18	0.0201906	0.0231445	0.00536153	0.0209783	0	0.0958608	0.0285558	3.29173e-19	0.18599	0.102299	0.00238528	0.00316979	0.00613795	0.00182457	0.00657255	0.0109539	0.00368072	0	1.19889e-18	0.0125943	0.017372	4.50491e-19	0	1.72101e-18	0.00695732	0.004214	0	0.0133172	0	2.49508e-18
TCGA-EJ-5525-01A	0.108701	1.04166e-20	0.0898184	3.55889e-18	0	0.014967	2.71729e-19	1.99817e-18	8.62143e-18	0	0.000555888	0	0.0092321	0	0.0508066	0.109673	0.00336356	0.0043486	1.02418e-18	0.0082318	0.0648958	3.25773e-19	0.00139068	0	0.0656369	0.0142125	0	0.232308	0.0697145	3.84884e-20	0.0167423	0.000136308	0.00115298	0.00327133	0.00682055	0.000801754	6.09074e-05	0	0.0370857	0.00209319	1.16032e-18	4.09516e-19	0.0430805	0.0347892	0.0119075	1.36547e-19	0.00535749	7.53473e-21	1.26587e-17
TCGA-EJ-5526-01A	0.0997943	3.33414e-19	0.0346009	0	9.8592e-18	0.0168614	1.30894e-18	0	0	0	0	1.24359e-18	0.0403447	0	0.0936861	0.0732097	0	0.0144898	0	0.0118681	0.0094962	0	0.0299866	0	0.0701128	0.0297766	3.86202e-19	0.169474	0.0811991	0.00774418	0.00183738	0.0067937	0.00376383	0.00396676	0.0114209	0.00302556	0	0	0.00252885	0.0112829	0	0	2.43485e-18	0.000788508	0.00356569	0	0.00862139	0	6.94493e-18
TCGA-EJ-5527-01A	0.172737	0	0.0229693	4.57383e-19	0	0.0205034	3.05515e-18	4.41991e-19	3.1468e-18	0	3.55571e-19	1.45185e-18	0.0480477	9.16073e-19	0.153142	0.0911604	0.0132036	0.0101215	5.398e-19	0.023374	0.0143603	0	0.0319324	1.34126e-20	0.0982097	0.0255775	5.21016e-18	0.186646	0.110914	0.00902093	0.00298218	0	2.55312e-20	0.00275412	0.00721169	0.00390433	3.07172e-18	8.1767e-19	0.0170993	0.0180778	8.1465e-19	0	2.35107e-18	0.00213207	0.00550815	2.67491e-18	0.0116702	5.49773e-20	2.11987e-18
TCGA-EJ-5530-01A	0.0410386	0	0	0	0	0.0016142	0	1.28884e-18	0.0200441	0.00411107	0.00300486	4.1291e-19	0.0178557	2.41126e-18	0.0323186	0.0837785	0.00366633	9.4931e-21	0.00320207	0.00652046	0.0333722	0.00480903	0.0280597	0	0.102648	0.00731727	0.00102631	0.150776	0.0640459	0.00100431	0.00814447	0.00189216	4.62489e-19	0.00539133	0.0103661	0.00328552	0.00448515	0	0.0276702	0.0149155	1.61901e-18	0	0.0347855	0.0212071	0.0649148	1.62297e-18	0.00848379	2.34342e-19	8.92819e-19
TCGA-EJ-5531-01A	0.212812	0.000549783	0.0289461	0.0222375	0.021767	0.00727545	4.29592e-19	5.60077e-20	0	0.0267108	0	4.40321e-20	0.0365661	1.97279e-20	0.189617	0.0131187	0.00499395	0.00622991	0.00386865	0.0238674	0.00976806	4.07986e-19	0.0595723	0	0.100919	0.0095533	8.31976e-19	0.0607332	0.14144	0.0156373	0.0016978	0.016111	0.0126067	0.00434634	0.0133106	0.00247268	4.12531e-21	0.00210606	0.0274206	0.0191595	0.0217978	0	0.0854448	0.0047969	0.00515463	0.000914203	0.00506102	0	3.72777e-18
TCGA-EJ-5532-01A	0.106357	0	2.40603e-19	2.52468e-20	0.00940142	0.0106028	0	0	0.00308975	0.00554704	4.26714e-19	2.50696e-19	0.0242937	0	0.0252328	0.0320574	0.00618671	0.0123103	0.000596466	0.00475385	0.0393914	0	0.012546	3.57054e-22	0.122045	0.00238225	0.00140053	0.102206	0	0.00223235	0.00919643	0.00331332	0.000222649	0.00695388	0.0107499	0.00445974	0.000779487	0	0.0309859	0	2.23934e-18	2.66998e-19	0.0307154	0.0178928	0.0118764	0	0.00541818	2.29957e-05	0
TCGA-EJ-5542-01A	0.0820271	0	0.0191662	0	1.33482e-17	0.0100708	1.83046e-18	2.53592e-19	0	0	2.72051e-19	1.3929e-18	0.030998	5.97373e-18	0.0873602	0.0855262	0.00640754	0.0143873	1.22607e-18	0.0139738	0.00945449	2.06694e-19	0.0295875	0	0.0552416	0.0168292	3.62809e-18	0.159487	0.0980582	0.00459665	0.000995438	0.00299201	4.7077e-19	0.00552315	0.00639326	0.00333903	4.18143e-18	1.0457e-18	0.0183485	0.0131806	2.52243e-18	2.99085e-19	3.23169e-18	0.000963813	0.0054546	2.75544e-18	0.0101329	2.40074e-18	0
TCGA-EJ-7115-01A	0.0922564	0	0.066804	7.13037e-21	0.00345474	0.00107619	1.61436e-19	0	0.00172237	0.016128	6.89209e-21	0	0.0185256	0	0.0325324	0.033457	0	0.00415723	0.00344287	0.00402375	0.0419521	0.00243354	0.0524385	0	0.083339	0.0143917	0.00139721	0.0855645	0.0273845	0.0108703	0.0118553	0.000644369	0.00291047	0.000657283	0.0108298	0.00474542	0.000587809	0	0.0252844	0.0251411	0	3.81298e-18	0.0117965	0.02295	0.00654244	0	0.00375924	0.000564076	0
TCGA-EJ-7123-01A	0.057211	1.99602e-19	6.80475e-19	0.00215807	0.0190282	0.00068096	5.82663e-19	1.46661e-18	0.00958825	0.00647303	2.10873e-19	1.13001e-18	0.0120873	0	0.0165533	0.000960531	0.012754	0.0083945	0.000948611	0.00349968	0.0305111	0.000810894	0.0263922	7.83255e-20	0.0468615	0	0	0.0227524	0.0466163	0.00184883	0.00878427	0.00688448	0.00191927	0.00719776	0.010729	0.00421842	0.00202802	8.66988e-19	0.0210034	0.002064	0.000209572	0	0.0883281	0.0182477	0.00309676	2.11791e-18	0.00285115	0	0
TCGA-EJ-7125-01A	0.166957	0	1.62426e-18	0.000571865	0.00848017	0.00913291	7.0474e-20	3.65482e-19	0.000381825	0.0327926	5.00345e-19	5.68161e-19	0.0318832	0	0.0388156	0.0311813	0.00710112	0.00156081	0.0032636	0.0125714	0.0426137	0	0.00924344	6.45908e-21	0.108682	0.0300272	0.00118623	0.134466	0.0538482	0	0.0217821	0.0148041	0.00578502	0.0225937	0.0194461	0.00318605	0.000247424	6.92902e-19	0.031706	0	1.67925e-18	2.50563e-19	0.0542505	0.031402	0.00380128	9.27694e-19	0.00456465	0	0
TCGA-EJ-7314-01A	0.0359909	1.88216e-20	1.18004e-18	0	0.0112466	0.00384349	0	7.38253e-20	0.00211214	0.00561551	0.00041112	0	0.0134754	1.24236e-18	0.0270186	0.0115563	0.0158576	0.0102019	3.52017e-19	0.00154541	0.00961268	1.24079e-19	0.0642395	0	0	0	1.33724e-18	0.0522226	0.0240242	0.018106	0.00598185	0.00013043	5.18681e-19	0.00209087	0.003606	0.00276045	0.000167291	0	0.0308587	0.0201295	0	4.64276e-19	0.0618604	0.0182393	0.000487356	0	0.00583613	0	1.07447e-18
TCGA-EJ-7315-01A	0.251602	0.00105286	0.0675282	0.154682	1.42436e-17	0.0222926	0.0263517	2.01082e-19	0	0.07428	1.63521e-18	0.0220062	0.110536	0	0.0780205	0.0936163	0.0625936	0.0106698	0.000276291	0.0212007	0.0397398	5.00907e-19	0.0303448	0	0.0436126	0.00624131	7.10792e-19	0.206732	0.0716556	0.000693937	0.0114683	0.0142939	0.00868872	0.0108994	0.00182886	0.00283492	0.000456494	0.0676633	0.0304542	0.0187671	0	0	0.0916211	0.0246992	0.00174736	0.00533986	0.00637236	2.42063e-18	6.18381e-18
TCGA-EJ-7317-01A	0.0252894	0	1.00611e-17	0	0.0311596	0	0	0	0.00063722	0.00672829	2.19842e-20	0	0.00603437	0	0.0142867	0.0170966	1.22766e-19	0.00775858	0.00110406	0	0.0388736	0	0.0305125	0	0.0994031	1.59308e-18	0.00165348	0.117564	0.00539875	0.00683424	0.012283	0.00307518	2.60292e-20	0.00514061	0.0101496	0.00593849	0.00129287	0	0.036332	0	2.82567e-18	5.72421e-19	0.127274	0.027726	0.00656388	0	0.00453599	0	0
TCGA-EJ-7321-01A	0.178732	4.58668e-20	0	0.0401795	0.00888228	0.0375237	0	0.000519893	0.00775705	0.0299322	2.02965e-20	0.0209215	0.0660664	0	0.104605	0.0260719	0.0496188	0.00937192	3.73016e-19	0.0233277	0.00294888	0.00372555	0.0420038	1.1158e-21	0.000853327	7.8441e-20	0	0.0625759	0.106061	0.00514771	0	0.00573444	0	0.0024938	0.00943159	0.00082634	0.00158163	0	0.0480485	0	2.58497e-19	9.25859e-19	0.0391454	0.00400732	0.00278464	4.41589e-19	0.00485937	4.90158e-20	0
TCGA-EJ-7327-01A	0.0968497	0	0.0946407	1.29174e-19	0	0.00505789	0	0	0	0.0082491	1.42205e-20	0	0.0240889	2.31823e-18	0.0262948	0.0964963	0.00859196	0.00394287	5.91591e-19	0.0129956	0.00821505	0.012872	0.0343135	0	0.0808317	0.0105615	0	0.11716	0.12395	0.00556989	0.000834165	0.00138864	0.00107263	0.00304221	0.0106373	0.00247405	1.05782e-19	2.7877e-19	0.0179879	0.0402775	1.29644e-18	1.13654e-19	3.05447e-18	0.00228299	0.00584215	0	0.00776414	0	1.17339e-18
TCGA-EJ-7328-01A	0.230071	0.00157738	0.0787683	0.00802542	1.13445e-18	0.0190852	0.000753852	6.06923e-19	0.0133659	0.0487702	0	0.021645	0.0723523	0	0.0804278	0.0658002	0.0030956	0.00776004	7.53353e-19	0.0212194	0.0738901	0	0.060347	1.37125e-20	0.0891816	0.0156327	0	0.197791	0.141468	0.0178841	0.0285834	0.0115709	0.00922752	0.00482714	0.0013242	0.00896049	0.00103565	0	0.0323785	0.0295763	0.00768718	5.5347e-19	0.0190874	0.0442049	0.00119534	0	0.0054292	2.22625e-19	0
TCGA-EJ-7330-01A	0.0601788	1.53554e-19	0.0452472	2.77615e-19	8.87334e-19	0	2.91736e-18	0	1.68089e-19	2.14644e-18	3.24507e-19	1.51237e-18	0.0212826	3.89907e-19	0.0265162	0.060142	0	0.00899271	0	0.00318705	0.0401067	0.00333836	0.053955	0	0.0800884	0.00884577	0.00111163	0.151402	0.0599466	0.0203013	0.0129394	5.67844e-19	0.00117785	0	0.00674107	0.00534693	0.000750705	0	0.013304	0.0265355	0	5.72149e-20	0	0.0220487	0.00492089	0	0.00722229	0.000828908	5.69979e-19
TCGA-EJ-7331-01A	0.180834	1.47618e-18	0.0236558	0	0	0.00373827	3.88174e-19	6.86833e-19	9.74616e-19	1.85168e-19	4.94137e-20	1.62151e-18	0.0327419	0	0.0625462	0.0671391	2.15872e-19	0.000635406	0.00456231	0.00860132	0.0379987	0	0.025167	2.20229e-20	0.154749	0.0398695	0.000195764	0.177664	0.0264224	0.00578105	0.0130418	0.00625025	0.0069632	0.00170592	0.0183309	0.00665466	3.55828e-18	0	0.0114239	0.0119931	0.00251959	0	2.44893e-19	0.0166959	0.01796	0	0.00516755	0	2.00051e-18
TCGA-EJ-7781-01A	0.124015	0	0.0306456	0.0181797	0	0.0204435	0	0.00351796	0.0208859	0.0206497	0	0.00353972	0.0404806	1.71024e-18	0.0672761	0.0257495	0.0241991	0.000163014	0.000537107	0.00891463	0.00485894	0.000140283	0.0282264	0	0.119636	0.0289359	1.08562e-18	0.0395643	0.0708129	0.0050385	0.000958265	0.00322059	0.0039164	0.0012848	0.021785	0.000909902	0	0	0.0046151	0.00616815	0.014945	0	0	0.00342637	0.00754749	0	0.00282953	0.000649709	0
TCGA-EJ-7782-01A	0.0931509	0.0030505	0.0292829	0	0.00274261	0.00406988	2.44599e-19	4.60476e-19	0.0245635	0.0352056	0	1.46155e-20	0.0201426	0	0.0458377	0.0550786	0.00816669	0.000178403	0.00398413	0.00624108	0.0354237	0.00374341	0.0226039	0.000350071	0.00562833	0.00219733	1.14695e-19	0.101064	0.0268207	0.00250477	0.00787186	0.00366624	0.000351029	0.000611962	0.0160247	0.000659055	0	0	0.0246669	0.00679654	2.17969e-19	0	0.0725558	0.0201425	0.00309703	6.6912e-19	0.00421737	0	3.20791e-19
TCGA-EJ-7783-01A	0.0942796	0	0.0380114	1.33529e-18	3.86754e-18	0.00258097	2.00751e-19	3.20605e-19	0.00858499	8.71919e-20	0	0	0.0210408	2.0762e-18	0.0432228	0.0622944	0.00912648	0.00150519	0.00613387	0.00588009	0.0303658	0.000675234	0.060657	0	0.0346963	0.0140972	0.000654311	0.173039	0.0602001	0.0187777	0.00527716	0	8.32324e-20	0	0.00973052	0.00541173	1.70298e-19	0	0.0176099	0.0258505	7.39903e-19	0	0	0.0136039	0.00415103	4.11822e-19	0.00882161	0	2.88088e-18
TCGA-EJ-7784-01A	0.0484137	3.81713e-21	3.33974e-18	1.72175e-19	0	0.00784183	4.26002e-18	0.00354117	0.0241503	0.0488473	0	0.00531018	0.0489888	0	0.029697	0.0291861	0.0383662	0.000873622	0	0.0125513	0.000264798	0.0032032	0.0335878	0	0.010551	0.00396481	0	0.0585231	0.120472	0.00424481	0	6.95537e-21	0	0.00124384	0.0108603	0.00118797	0.00525155	7.38779e-18	0.0228085	0.00330793	1.00188e-18	0	0.0405856	0.000465586	0.00514459	0	0.00496185	0	2.03287e-18
TCGA-EJ-7785-01A	0.125247	0	0.0787612	0	1.82144e-18	0.00318603	0	4.11196e-19	0.00322239	0	5.59722e-19	0	0.023407	0	0.0791047	0.0897893	0.00712745	0	0.00183555	0.00809754	0.052777	0.000636862	0.0482144	0	0.089703	0.0405157	0.00153817	0.210836	0.0552634	0.00652867	0.010963	0.00627485	0.00333313	0.00243122	0.010756	0.00388978	0	0	0.0149708	0.0330188	0.000555463	2.90665e-19	1.81088e-18	0.0209865	0.00948702	0	0.00631744	0.00156893	0
TCGA-EJ-7786-01A	0.0442314	4.23763e-20	0.0100049	0	0.0131065	0.00124138	2.5954e-18	0	0.00770243	0.00522627	0.00278395	0	0.0204545	0	0.00750351	0.0315213	0	0.00605119	0.00333096	0	0.0212876	7.06137e-20	0.0223105	3.67338e-21	0.136026	0.0124314	2.55335e-20	0.101718	0.0393662	0.00442963	0.00733252	0.00833621	0.00655921	9.5111e-05	0.00942663	0.00364289	0	0	0.015635	0.00320804	6.40281e-05	4.46118e-20	0.0359311	0.0141686	0.10363	4.43921e-19	0.0046652	0.000752387	1.33134e-18
TCGA-EJ-7788-01A	0.112915	3.64299e-19	0.0302475	0	0	0.0126852	0	3.42988e-19	3.79283e-19	0.0179153	0.00369759	0.000759276	0.0313149	4.2123e-18	0.106983	0.0766734	0.0117514	0.00344225	1.76592e-19	0.0131804	0.0140599	0.00826659	0.022556	0	0.137383	0.0232632	0	0.126879	0.139454	0.00147822	0.0025942	0.00604958	0.0014084	0.00764631	0.0110345	0.00318623	9.64724e-20	1.3538e-18	0.0297817	0.00982039	0	0	0	0.00647947	0.100883	0	0.00593339	0	0
TCGA-EJ-7789-01A	0.0367041	0	0	0.0075857	0.0184895	0.00707706	1.67917e-18	5.42214e-21	0.00634516	0.000429423	0	0	0.00835794	5.0384e-18	0.0510862	0.00908101	0.00935822	0.00203254	0.00990765	0.0146077	0.0345562	0.00579522	0.00739449	0.00108996	1.09859e-18	0.0176464	0	0.0687307	0.180302	0	0.0141947	0.00158464	0	0.00501441	0.0252236	0.00142289	0.00139868	0	0.0444885	0	0.000356264	6.85054e-18	0.122618	0.0202245	0.0165214	9.0944e-19	0.00196249	0	2.85207e-18
TCGA-EJ-7791-01A	0.0950518	0.00187558	0.116137	0	0	7.07232e-19	1.07876e-19	0	0	0.012069	0	0	0.0187652	7.74223e-18	0.0378547	0.0857581	0	0	0.00265998	0.00385372	0.0410927	0	0.0468974	0	0.194991	0.0166046	0	0.204782	0.0524521	0.0134396	0.0125957	0.0031588	0.00260329	0.00340982	0.00352061	0.00428669	0.00285891	7.70056e-19	0.018207	0.0297239	0	5.53616e-19	0.002915	0.0201624	0.00271199	1.45774e-18	0.00803567	0	5.08412e-18
TCGA-EJ-7792-01A	0.231462	0	0.117219	0.000961988	0	0.0139746	0.00268184	1.2323e-21	5.40751e-20	0.0338023	7.83652e-20	0.00304108	0.0401989	2.01916e-18	0.0843217	0.0781876	0	0.000805029	0.00170966	0.0131746	0.0699983	0	0.0112572	0	0.1862	0.0348502	3.26641e-19	0.24435	0.0515124	0.00224076	0.0316308	0.00558399	0.00631025	0.0051324	0.00488724	0.00652867	1.54607e-18	0	0.0313318	0.0209371	0	0	0	0.0347125	0.133624	3.49778e-19	0.00701014	0	4.2081e-18
TCGA-EJ-7793-01A	0.00576233	1.482e-20	0.0151382	4.13954e-20	0.00153357	0.000899863	0	0	0	0.0097659	0	0	0.0194553	0	0.0212255	0.0188518	0.00404865	0.0130574	0	0.00203218	0.0174493	0.00115402	0.0432963	2.52375e-19	0	0	0	0.0724357	0.0364729	0.0148322	0.00347989	0.00236328	4.01549e-19	0.0028805	0.0063694	0.00177181	0.00120047	5.80495e-19	0.0190832	0.00687011	5.8982e-18	1.31943e-19	0.0864037	0.00912119	0.0060831	1.48218e-18	0.00802381	0	2.42878e-18
TCGA-EJ-7794-01A	0.118881	0	0.0682597	0.00140211	0.013056	0.00410571	7.66218e-19	0	0	1.18414e-18	0	0	0.0199224	0	0.0505859	0.021618	0.00523231	0.00724245	0.00372965	0.00659606	0.0170914	0	0.0480993	1.06745e-20	0.10154	0.0165447	0	0.075191	0.0581095	0.00977165	0.00544234	0.0115264	0.00721503	0.00529437	0.0137988	0.0026716	0.000592596	0	0.0130427	0.0248741	0.0158051	0	0.0652801	0.00915671	0.00547035	0	0.00526107	0.0013034	0
TCGA-EJ-7797-01A	0.135527	0	0.0151873	0	0.0106272	0.00714161	8.65025e-20	0	0.00900369	0.0258206	0	0.0010566	0.0273761	0	0.0309125	0.0242723	0.00899556	0.0205299	0	0.00496279	0.0180882	0.00124787	0.0599608	5.8148e-20	0.0295641	0.00675133	3.68148e-19	0.091285	0.0199783	0.0181755	0.00400097	0.00166595	2.95633e-19	0.00282085	0.00716565	0.00237427	0.000747363	3.95855e-18	0.0368899	0.0137159	0	4.07613e-20	0.0233147	0.0123255	0.00354978	0	0.00438718	7.79416e-05	0
TCGA-EJ-8468-01A	0.0755858	0	0.0407969	0.0021286	0.00101071	0.0198437	0	0.00486904	3.17946e-20	0.0281218	0	0.00107009	0.0457825	0	0.113548	0.057749	0.0102196	0.000908807	0.00475128	0.0149477	0.0185105	0.00110465	0.0252194	2.88679e-22	0.159247	0.0332879	0.00180991	0.176665	0.291917	0.00231949	0.00815079	0.0119587	0.00912258	0.00680608	0.0206922	0.0055935	0	0	0.0139863	0.0160422	0.0119564	5.15311e-19	2.91459e-18	0.0101826	0.000190153	0	0.00907892	0.000508209	1.31393e-18
TCGA-EJ-8469-01A	0.0646453	0	0	7.99196e-19	5.44789e-20	0.0187673	0	1.29534e-19	1.93611e-18	0	0.000501159	2.39319e-19	0.0264916	1.78861e-18	0.0515711	0.051466	0.0208334	0.012821	0	0.017386	0.00981423	5.41336e-19	0.0190795	0	0.0022915	0.00770349	1.73867e-20	0.149998	0.130098	0.00248952	0.00199678	8.90772e-20	1.03304e-19	0.00121736	0.0122612	0.000276019	0.00261639	4.4156e-18	0.052314	0.00877325	5.82306e-18	0	0.0186857	0.00641671	0.00761296	0	0.009074	1.2871e-19	0
TCGA-EJ-8470-01A	0.354836	1.30392e-20	1.81768e-19	0.100168	0.0116014	0.0676146	0.017918	0.0249208	0.0114491	0.0433844	9.6965e-20	0.0456415	0.128396	1.2624e-19	0.152614	0.0112683	0.0489403	0.00601893	0	0.0432789	0.00238738	2.65448e-19	0.0429301	0	0.022885	0.00925434	0	0.0485131	0.166907	0.0104737	0.00123522	0.0260391	0.0175043	0.00135218	0.0100902	0.000539269	3.6729e-20	0.012318	0.00554748	0.00918941	0.0141264	6.00252e-20	1.10003e-18	0.000447224	1.75645e-20	0.00449007	0.00132181	2.67532e-20	0
TCGA-EJ-8472-01A	0.0360756	0.000161278	0.0270251	5.70361e-20	0.00817544	0.00522606	0	1.28943e-18	0.00393227	0	0.00521396	0	0.00711713	0	0.0181322	0.0615655	0.00088943	0.0208941	2.42052e-19	0.014181	0	0.00262283	0.0499517	3.51028e-20	0.0629798	0	0	0.11699	0.170814	0.00761319	7.00756e-20	0.00464283	0	0.00492202	0.0030863	0.000479412	0.00031687	1.81018e-18	0.023946	0.0297074	0	1.46908e-19	0.00343869	1.69742e-21	0.00586563	0	0.0119002	0	1.90585e-18
TCGA-EJ-8474-01A	0.0845195	5.96835e-20	0.0441654	2.97649e-19	0	0.0069579	3.67289e-18	2.75431e-18	0.00381234	0.0293348	0.000431514	0	0.0281329	0	0.0236963	0.0628498	0.00369637	0.0188949	2.57066e-20	0.00456508	0.02776	0.00777345	0.0243769	0	0.0818583	0.00389302	0	0.147977	0.042672	0.00322238	0.00638745	0.00326245	0	0.00602817	0.00189148	0.00430667	0.00167516	1.45377e-18	0.0292063	0.00508328	3.67088e-18	2.55263e-19	0.06624	0.014506	0.00585014	0	0.00830488	0	0
TCGA-EJ-A46B-01A	0.0166416	1.55403e-20	0.0205439	0	0.0175167	0	0	0	0.0129038	0.00336934	0	0	0.0107438	1.06507e-18	0.0119414	2.72564e-19	0.0066637	0.00395509	0.000695635	1.54293e-20	0.0262224	0.000850045	0.049337	2.45291e-20	0.0738998	1.05589e-18	0	0.0606082	0.0255659	0.0185394	0.0131002	0	0	0	0.0106141	0.00233382	1.25188e-20	6.65018e-18	0.0177805	0.015832	2.46759e-18	0	0.12966	0.0237379	0.00716443	5.92636e-19	0.00559928	1.45052e-19	0
TCGA-EJ-A46D-01A	0.0425146	0.00200689	0.0488761	2.11255e-19	0.0183254	0.00141913	0	2.33744e-19	0.0266718	0.0194955	1.53511e-21	8.80945e-20	0.0157106	1.46082e-19	0.0594262	0.0406518	0.00459936	0.00888065	1.35899e-19	0.00198249	0.0100536	0.00233264	0.0617489	5.55478e-19	0.0366953	0	0	0.100215	0.0245862	0.0198306	0.00405231	3.05286e-19	0	0	0.00529757	0.00123553	0.000986143	6.83311e-18	0.045546	0.018177	4.76706e-19	4.83431e-19	0.0420517	0.0128248	0.00517551	2.2862e-18	0.00561731	0	0
TCGA-EJ-A46E-01A	0.0719528	0	0.0958753	0	0.0306088	0	0	0	0.0209967	3.7868e-18	0.000572829	1.73643e-18	0.00884872	0	0.0437305	0.0112343	0.00371591	0.00617246	0	0	0.00584809	0.00215454	0.0879812	0	0.0837032	2.44228e-18	0.000541684	0.0980756	0.0126252	0.0441196	0.0072984	0	4.94836e-19	3.84422e-19	0.00358329	0.00127859	2.76987e-18	0	0.0158315	0.054554	1.90107e-18	0	0	0.0117097	0.0015896	0	0.00415392	0	3.31979e-18
TCGA-EJ-A46F-01A	0.0615714	1.33053e-19	4.98577e-18	8.23441e-19	0	4.63327e-19	0	3.93597e-18	0.00826819	0	0.00712135	0.000784317	0.018988	4.31114e-18	0.0106206	0.0227226	0.00629594	0.0214684	0	0.00573149	0.00219504	0	0.0433824	0	0	3.73809e-19	2.04613e-18	0.0661156	0.0951844	0.00456507	0	0.000445394	1.07329e-18	0.013217	0.00273147	0.000409315	0.000311556	0	0.0761559	0.0130268	1.46208e-19	5.54537e-18	0.157299	0.0175161	0.00450759	0	0.0111045	7.2154e-20	0
TCGA-EJ-A46G-01A	0.199127	0	0.0694002	6.41724e-19	0.050915	0.00369312	0	0	0.0447282	0.0278164	0.000887251	1.21991e-18	0.0126843	1.30972e-19	0.0160512	0.0482163	0.0124484	0.00500245	0.00551348	0.00742743	0.0215868	2.5334e-19	0.0145592	0	0.0293415	1.7123e-18	0.00231278	0.07765	0	0	0.0107996	2.02812e-19	0.000562844	0.00263888	0.00894825	0.0011822	0.00124668	7.08883e-18	0.0160134	0.0201111	3.07856e-19	0	0.162564	0.0225674	0	0	0.00491793	1.48574e-19	6.79349e-18
TCGA-EJ-A46H-01A	0.144057	4.36392e-19	0.145157	0	2.55588e-18	6.23175e-20	0	2.21882e-18	0.0155732	0.00958586	0	6.16223e-20	0.0304164	1.92e-19	0.107875	0.0706866	0	1.99328e-20	0	0.00393714	0.0898074	0.00188143	0.109992	0	0.154605	0.0134995	0	0.28594	0.0113005	0.0667339	0.0501187	2.07066e-18	8.08861e-20	0	4.32374e-19	0.0102267	0	0	1.22572e-18	0.0769329	5.77697e-18	5.54862e-19	1.58402e-17	0.0576132	0	0	0.00350078	0	9.49414e-19
TCGA-EJ-A46I-01A	0.0711747	0	0.0652076	4.82464e-20	0.0161797	0	3.22157e-19	6.85811e-19	0.0328912	0.0228028	0	0	0.0106864	0	0.0188307	0.0133564	0.0124498	0	3.96129e-19	0.00135486	9.37734e-05	0.00101156	0.0730455	1.06189e-19	0.0979123	0	0	0.0681836	2.5873e-19	0.0192356	0.000340677	1.68199e-18	8.61047e-19	0	0.00386192	0.00205244	0.000194088	6.79599e-18	0.0148483	0.0235755	0	2.60162e-19	0.0702326	0.00294639	0.00524849	4.39926e-18	0.00494606	5.7893e-19	0
TCGA-EJ-A65B-01A	0.134007	0.00212063	0.0500991	0	0	0	0	1.60457e-17	0	0	0	1.12011e-17	0	0	0.0323474	0.0317182	0	0.0027022	0	0.00200061	0.117343	0	0.0643345	0	0.101103	6.64173e-19	0	0.292118	0.0418297	0.01948	0.0663528	0.0124081	0.00900391	0.0183684	0	0.00631836	0.00180642	2.32875e-17	0.0624977	0.0207656	9.91258e-19	9.09059e-19	0.175719	0.0965261	0.000157988	0	0.00692416	0	0
TCGA-EJ-A65D-01A	0	0	0	0	0.0722863	5.17114e-19	0	1.90482e-17	0.0343111	1.17392e-18	0.00202597	0	9.10165e-19	0	1.63462e-19	0.0279411	0.0131979	0	4.98678e-18	4.59315e-20	0.00661931	1.37936e-19	0.0294338	2.78274e-18	0	0	3.94186e-19	0.0398081	0.077797	0.000559211	0.00288977	0	0	0	0.00568803	0.000330143	0.00175131	0	0.0987628	0.00851707	3.50722e-18	3.74844e-18	0.229019	0.0277553	0.00453899	3.02595e-19	0.00370322	0	0
TCGA-EJ-A65E-01A	0.0565841	8.30544e-20	0	0.000465105	0.0201788	0.00896704	5.79963e-19	1.66909e-19	0.011677	0.00801253	0.000885717	2.89733e-19	0.0206516	1.45941e-18	0.00840529	0	0.00644073	0.00995461	0.000703792	0.00318872	0	0.000670704	0.0434252	1.23602e-20	0.0417226	0	6.39211e-19	0.046315	0.0252002	0.0109351	0.00113259	0.00055201	0.000161893	0.00142604	0.0069209	0	0.00111086	0	0.0324917	1.97741e-19	0	1.2158e-18	0.0384541	0.00328591	0.00102399	0	0.00271331	1.37471e-19	0
TCGA-EJ-A65F-01A	0.117111	0.00183163	0	0	0.0179721	0.0131988	0	1.47942e-18	0.0207314	0.0110604	0	0.00994153	0.0482383	0	0.0622268	0.0660258	0	0.0125527	0.0078417	0.0114501	0.0436187	0.0073845	0.0283452	0	0.145388	0.0172197	0.000382109	0.241767	0.116147	0.00213734	0.0193612	0.0010524	0.000361299	0.00509195	0.0150543	0.0074364	0.00197394	0	0.0667501	0.00864066	0	9.69064e-19	0.0024347	0.0393907	0.00350797	0	0.00714509	6.7859e-20	0
TCGA-EJ-A65G-01A	0.0232219	8.76069e-20	0	0.00230523	0.0305121	0.00173653	0	0	0.0213909	0.0174664	0.00519071	0	0.0149065	4.32833e-18	0.00542895	0	0.00472814	0.010096	0.00760841	4.10978e-22	0.00699228	7.83641e-19	0.0203228	0	0.0898692	1.21869e-20	6.5372e-19	0.0449236	0.0205757	0.00201861	0.00416543	0.00333451	5.60272e-19	0.00298004	0.0135333	5.74497e-06	0.00108908	5.5745e-18	0.0348788	0	2.25826e-18	0	0.100541	0.0102603	0.0578942	6.42984e-19	0.00371707	0	0
TCGA-EJ-A65J-01A	0.103103	0	0	0.012166	0.0112481	0.00633177	0	7.96846e-19	0.00414096	0.04508	0	1.09767e-18	0.0224203	0	0.00625159	0.0455608	0.00136815	0.00298431	6.43592e-21	0.00731665	0.0155916	5.72204e-05	0.0219752	0	0.0171461	0.00240153	0	0.0710526	0.0432114	0	0.00604218	0.0154023	0.00252607	0.019359	0.0135876	0.000871262	0.00226647	0.00054406	0.0297897	0.0108653	0.000946215	4.20619e-20	0.0950821	0.0141757	0.00246888	5.09222e-20	0.000878163	0.000668722	0
TCGA-EJ-A65M-01A	0.112739	0.00147025	0.0122588	0.00498779	0.0383526	0.00440007	0	3.8268e-19	3.16747e-19	0.029504	0.000821415	0	0.032608	0	0.0685943	0.00812446	0.000868596	0.0195257	0	0.0106338	0.00981504	0	0.0428512	0	0.0415187	3.84785e-19	1.14152e-18	0.0745075	0.115713	0.011043	0.00565922	0.0168299	0.00973061	0.00847974	0.0072446	0.000819127	0.000817082	0	0.0618552	0.00771089	7.00044e-19	0	0.128738	0.0178842	0.00427392	0	0.00395944	1.09194e-20	0
TCGA-EJ-A6RA-01A	0.12672	0.00178666	0.0426138	0	0.013278	0	0	5.51966e-19	0.0102513	0.0300247	0.000935508	0	0.0236854	0	0.0245968	0.00453348	0.00958418	0.0208509	0.000230203	0.00335328	0.025199	0	0.0739777	0	0.0505979	7.30367e-19	0.000665747	0.0892521	0.00497471	0.0278332	0.013694	1.90056e-21	0.000752684	0.00283882	0.00388469	0.00350892	0.000426661	2.11088e-18	0.0409851	0.0208367	8.78226e-19	0	0.0643526	0.0313904	0.00328406	0	0.00428378	0	0
TCGA-EJ-A6RC-01A	0.209131	0.002763	0.114005	0.122609	0.00519948	0.00669396	0.00514292	1.50602e-19	0.0101739	0.0420673	0.002461	0.00681757	0.0558431	0	0.0772004	0.0585349	0.00976412	0.000254424	0.00676852	0.01085	0.045014	0.0011724	0.0470489	1.20647e-20	0.173025	0.0199992	0	0.188602	0.0908747	0.00997552	0.0246511	0.00346201	0.00523277	0.000635308	0.00864746	0.00617787	0	0.0484186	0.0381808	0.0251543	7.0755e-19	0	0.00725089	0.0377659	0.137646	0.00468101	0.00478687	0	1.47902e-18
TCGA-EJ-A7NF-01A	0.012366	0	3.13103e-18	5.59621e-21	0.0216245	0.00379288	7.43716e-18	0	0.0272314	0.0165563	0.00485521	0.000274311	0.01694	3.51383e-18	0.0113867	0.00414436	0.0150506	0.0232409	7.9834e-19	0.00310783	0	0.00127637	0.0345043	6.26089e-19	0	0	0	0.0271753	0.077596	0.00550592	1.70577e-19	0.00246387	0	0.00407472	0.00545582	0	0.00251149	1.41516e-18	0.0441904	0.000893541	5.46528e-18	0	0.0845352	0.00553108	0.00397094	0	0.00572868	3.44801e-19	3.05229e-18
TCGA-EJ-A7NG-01A	0.0639484	0.00276503	0.0955349	4.44168e-19	0.00220357	0	0	7.65567e-20	0.0174989	0.0271562	2.5852e-20	0	0.011024	0	0.017084	0.0466812	0.00813505	0.00597296	0.00119637	0.000934984	0.00794276	0.00329676	0.0592121	0	0.121766	0.00473887	0.000656504	0.110454	0.0285289	0.023041	0.00239973	2.59483e-19	0	3.18198e-20	0.00493874	0.00143101	0.000260952	1.44678e-18	0.0244432	0.0193481	0	5.81609e-19	0.0285371	0.00776997	0.00989385	2.72102e-18	0.00664769	2.41766e-20	3.28805e-18
TCGA-EJ-A7NH-01A	0.0633531	0.00060636	0.0470927	0	0.0148818	2.22317e-21	0	2.07408e-18	0.0322911	0.022221	0.00221776	7.49069e-20	0.016121	8.14103e-20	0.010782	0.0198598	0.00737021	0	0.00611125	0.00042437	0.0448805	0.00355894	0.0443819	0	0.0694313	0.00515198	0.000296701	0.0845297	0.00424869	0.0143551	0.0176255	0	0	0.00195953	0.00981326	0.00437424	0.000626539	8.02511e-19	0.0255052	0.0142199	2.0755e-19	4.78218e-19	0.0952831	0.0339223	0.00335129	2.41716e-18	0.00627842	9.68039e-22	0
TCGA-EJ-A7NJ-01A	0.12289	0	0.0369438	0.0243036	0.00728318	0.00423531	7.44295e-20	0.00384071	0.0221957	0.0422918	9.66669e-22	0.015338	0.0527478	0	0.0260017	1.80773e-19	0.0147793	0.00413219	3.26387e-19	0.00506291	0	0.00500314	0.0618207	0	0.0179663	0	0	0.0179854	0	0.0261546	0.000587911	0.00274788	0.000540334	0.0028564	0.00475197	0	0.00264595	0.00261362	0	0.0177262	0	5.07238e-19	0.00898696	0.0020418	7.52626e-20	0	0.0046777	0	0
TCGA-EJ-A7NK-01A	0.0419157	0	0.0845042	2.97137e-19	4.09937e-19	0	0	4.09744e-18	0.02779	0.00485883	0.000368671	4.52157e-18	0.00298116	2.02373e-18	0.0275082	0.0298037	0.00652545	0.00446577	9.08988e-20	0.000944539	0.00168253	0.00485583	0.081374	0	0.0564853	0	0.00134467	0.0894483	0.0204018	0.0338271	0.00362983	1.29848e-19	0	2.65059e-19	0.000192391	0.000221766	0.00231473	0	0.0128897	0.0374754	0	3.74673e-18	0.0385187	0.00805415	0.020179	0	0.0060155	4.7986e-19	0
TCGA-EJ-A7NM-01A	0.298467	0.0017836	0.0593332	0.109104	0.0463276	0.0103866	0.0286266	1.01524e-19	0.0150218	0.0245893	0	0.0265673	0.0770193	0	0.0754193	0.02321	0.0547635	0.0061465	1.08723e-19	0.0168674	0.0109741	0.00112044	0.023733	0	0.050675	1.46578e-19	0	0.0644378	0.00788611	0.00103097	0.00289732	0.00110613	0.00182342	0.00513407	0.00743646	4.25467e-20	0.000352688	0.0446716	0.0380192	0.0173508	0	3.05027e-18	0.127008	0.0145582	8.15076e-05	0	0.00355749	0	0
TCGA-EJ-A7NN-01A	0.155056	0.000600039	0.0401718	0.0429047	1.7159e-18	0.00371187	1.84243e-19	0	0.0216045	0.0368268	1.64195e-20	0	0.0222309	0	0.0528676	0.0109021	0.0222274	0.0024233	0.0108363	0.00737786	0.0572603	0.0142311	0.0419869	0	0.0271016	0.0182642	3.30613e-05	0.0927746	0.0436205	0.00463045	0.0197536	0.006073	0.00356694	0.00709985	0.0130864	0.00321051	0.0056032	0.00792394	0.0432743	0.0118225	0.000461366	1.85444e-19	0.0370188	0.0447152	0.000964385	0	0.0032814	0	0
TCGA-EJ-A8FN-01A	0.139609	1.56385e-20	0.0225694	0.0228073	0.010605	0.000217444	7.77233e-19	5.99245e-19	0.0214217	0.0486913	0.0033727	0.00700623	0.0263607	0	0.0262107	0.0286229	0.0088662	0.00499864	0	0.00702736	0.0265124	0	0.0147845	0	0.127406	0.0181966	0	0.115965	0.0735609	0.00187478	0.017306	0.0184169	0.00854981	0.00918629	0.00783216	0	5.79375e-19	0.00578622	0.035154	0.00435067	0	0	0	0.0285635	0.215738	0	0.0027173	0.000217102	0
TCGA-EJ-A8FO-01A	0.0231095	9.31139e-20	0.0290672	0	5.92458e-19	0.000856637	0	0	0.00994265	0.0159433	0.000405551	7.22474e-20	0.0153562	0	0.029894	0.0185538	0.00432022	0.0108476	0.00118296	0.00373615	0.0326941	0.00186452	0.0469396	0	0.0289833	1.05593e-21	0	0.0925895	0.0603763	0.01347	0.0094522	0.00230838	0	0.00324133	0.00600016	0.00249321	0.000434267	8.35828e-18	0.0215177	0.00283638	0	1.01894e-19	0.136367	0.0217251	0.00480375	0	0.00817908	8.81586e-20	1.00579e-18
TCGA-EJ-A8FP-01A	0.162262	0.000456354	0.10239	0	0	0	4.53199e-19	0	0.0105982	0.0164752	0	0	0.0214164	0	0.0760625	0.0254918	1.13809e-21	0.00694201	0.000110929	0.00809216	0.0935923	6.38123e-20	0.0626356	8.27331e-21	0.0798009	0.0146209	3.30283e-19	0.153847	0.0432154	0.0275556	0.042873	1.86604e-20	0.00200052	0.00195882	0.00194402	0.00550557	0	0	0.0153456	0.0316245	1.02038e-18	3.76644e-19	9.20134e-19	0.0572972	0.00194317	0	0.00608728	0	0
TCGA-EJ-A8FS-01A	0.0374536	0	0	0.0195761	0.0296609	0.0109845	0	0	0.0263327	0.029138	0.00019794	0	0.0243572	0	0.0529534	0	0.0150212	0.0142642	0.000140815	0.00150641	0	0	0.0327788	0	0.036596	0	7.63589e-19	0	0.0118659	0.00677996	4.43427e-19	0.0103761	9.45166e-05	0.00934427	0.0154512	0	0.00261622	0.00249719	0.0283109	1.50322e-18	0	1.09278e-18	0.0809177	0.00164633	0.00256567	9.7902e-19	0.00121392	7.72276e-19	7.39961e-18
TCGA-EJ-A8FU-01A	0.141582	0.00291853	0.11667	0	1.52054e-18	0	0	0	0.0170517	0.0053494	0	0	0.0210042	5.30824e-18	0.0506202	0.0643158	0	0.0114664	0.00291563	0.00476544	0.041492	0.00408363	0.0475872	0	0.133016	0.0173362	2.46348e-22	0.214049	0.043686	0.0191929	0.01708	2.09572e-20	0	3.68034e-19	0.00691435	0.00423968	0.00111698	0	0.0244517	0.0308824	2.04839e-19	7.69236e-19	0.0174558	0.0267559	0.00740884	0	0.0087624	2.23671e-20	3.50745e-18
TCGA-EJ-AB20-01A	0.166868	0.0126526	0.211364	0	0	2.69667e-18	0	5.44302e-18	0	0	0.00401482	0.00327121	0.0370149	2.46276e-18	0.0231986	0.091858	9.48855e-18	0.014849	0.0109008	0	0.0883501	4.27247e-18	0.0250744	0	0.347904	0.00537564	1.90823e-19	0.417661	0.0343928	0.0187329	0.0513004	1.29702e-18	0.00170063	0.000114936	4.44161e-19	0.000288468	0	3.97933e-18	0.0869169	0.0454544	0	1.57219e-18	0.00710346	0.0643257	0.0140522	0	0.0186318	7.96322e-20	5.86695e-18
TCGA-EJ-AB27-01A	0.187339	1.29207e-19	0.0393947	0.106859	0.0154012	0.0130781	0.00719563	0.00291026	0.0172675	0.0525116	0	0.00570661	0.0405957	0	0.0344871	5.79462e-19	0.0243848	0.0108264	0.00322931	0.0101857	0.000504319	0.00119914	0.0460202	0	0.0747606	0.0062302	0	0.0344013	0.0110952	0.0172848	0.00193368	0	1.74706e-19	0.00140031	0.00922981	0	0.000385456	0.0446178	0.0233643	0.0118835	3.31351e-19	3.55423e-18	0.0641758	0.0053252	0.00749419	0.00131886	0.00380592	6.57383e-19	2.37459e-18
TCGA-FC-7708-01A	0.169824	0	0.0808361	0	6.05303e-18	0.00497834	8.36923e-19	0	5.00063e-20	0.0131916	0	0	0.0332576	0	0.0734777	0.100631	2.34753e-19	0.00121769	0	0.0160386	0.0407863	0.00654295	0.0486202	0	0.114443	0.0164644	0	0.181388	0.0973531	0.0127219	0.0128754	8.79535e-20	0.00148977	0.00229286	0.00478794	0.00700182	0	0	0.0179064	0.021216	0	0	0	0.0246699	0.00752714	2.66945e-19	0.00846587	5.50215e-19	6.41044e-18
TCGA-FC-7961-01A	0.114167	0.00259196	0.0556889	0	0.00687948	0.00598176	1.89318e-18	0	0	2.72125e-18	1.78686e-20	1.4402e-18	0.0240061	4.74768e-19	0.0409691	0.0551263	5.09536e-20	0.0182661	9.23593e-22	0.00712128	0.0310887	0	0.0193627	0	0.0896581	0.013093	0	0.145985	0.0933956	0.00206808	0.0107203	0.0109354	0.00933751	0.00316136	0.0105425	0.00163277	0.000432885	8.30552e-19	0.0273319	0.0269514	0.001577	6.38352e-18	0.117796	0.0184408	0.004645	0	0.006053	0.00114282	0
TCGA-FC-A4JI-01A	0.0258708	0	0	0.0301111	0.0550109	0.0396618	0	1.82768e-19	4.24698e-18	0	0.00297996	0.0131121	0.0634796	0	0.0186204	1.14801e-18	0.0155385	0.0186879	0	0.0111632	0.0115613	4.23384e-19	0.0114179	0	0	1.24638e-18	6.274e-20	4.70194e-19	0.192884	0	0.00336429	0.00645767	2.93629e-20	0.00805739	0.0139272	0	0.00162043	0	0.038582	0.00220179	9.85277e-19	0	0	0.0130617	0.000120846	0.000836774	0	2.72872e-20	0.00618189
TCGA-FC-A5OB-01A	0.0329922	2.45954e-19	4.66124e-18	3.48506e-19	0.0495195	0.00584804	0	1.81533e-19	0	3.40382e-18	5.51693e-20	0	0.0241354	0	0.0319818	1.41671e-18	4.01131e-19	0.0144252	0.00204582	0.000128475	0.0218531	0	0.00711814	0	0	7.34772e-19	1.15403e-19	0.0520196	0.0133783	0.00078742	0.00578419	0.00401052	0	0.00459766	0.0133915	0.00130329	0.00134902	0	0.0321115	0.00165032	0	7.85336e-18	0.0290969	0.0144064	0.0107255	0	0.00464136	2.05273e-20	0
TCGA-FC-A66V-01A	0.0693149	0.00200541	0.0443806	1.26949e-18	0.0121909	6.46181e-20	0	0	0.006161	0.0288781	0.00340439	0	0.00339035	1.42993e-18	0.0269025	0	8.62633e-20	0.00145346	1.09857e-18	0.00112422	0	0.00131977	0.0958005	9.17195e-20	0.048096	5.46534e-20	0	0.0704416	0.0136067	0.0519683	0.00323639	0.00271342	0.00196505	0.00850552	0	0	0.000234757	0	0.049524	0.0470445	2.41904e-18	0	0.173957	0.014351	0.00169414	0	0.00873068	2.21001e-19	1.65701e-18
TCGA-FC-A6HD-01A	0.0808543	1.93335e-19	0	0.0223166	0.0578798	0.00221377	1.07656e-18	1.99733e-18	0.0116998	0.00639211	0.0060372	0.00203965	0.0148305	3.98862e-18	0.017985	0	0.0228787	0.0244102	0.00475487	0.00406416	0.0141368	3.12193e-19	0.0353295	2.66359e-21	3.13336e-18	2.0746e-18	7.50733e-19	0.0151309	0.0692033	0.0129514	0.0094053	0.00520076	0	0.0122113	0.00990183	0	0.000462688	0.00449087	0.0939206	1.71886e-18	0	6.25756e-18	0.173782	0.0261461	0.00367636	0	0.00199213	0	0
TCGA-FC-A8O0-01A	0.0227302	0.00177081	0.104034	3.74118e-20	0.00664587	3.08879e-20	5.53099e-20	2.19074e-19	0.0204692	6.57435e-19	0	4.40536e-19	0.00148211	6.38072e-19	0.000358514	0.00941938	0	0.00397159	0.00447573	0	4.08522e-20	3.86286e-22	0.0599167	0	0.107354	0	0.000162548	0.12442	0.00664974	0.0316649	0	8.10373e-19	0	0	0.010445	0.00362885	0	6.70807e-18	0.0704895	0.00845906	2.6463e-18	5.97772e-19	0.111551	0.00250927	0.00881618	0	0.0107345	0	0
TCGA-G9-6329-01A	0.196133	0.00389175	0.0384014	0	0.00197875	0.000250917	0	0	0	0	0.00128178	0	0.0336555	5.48569e-19	0.0604008	0.0804437	0	0.0132174	0.00182001	0.00498362	0.0315351	0	0.0765448	1.2277e-20	0.102391	0.0094133	0	0.243182	0.0165259	0.0289131	0.0129955	0	7.93886e-20	0.000795907	1.09652e-19	0.00284676	0.00123324	0	0.0521271	0.0318961	5.27471e-18	7.48847e-19	0.0641549	0.0277504	0.00583461	8.72471e-18	0.0146944	0	4.06069e-18
TCGA-G9-6332-01A	0.00584609	0	0	1.14308e-18	0.0359138	0.00257341	0	1.47386e-19	0.0306243	0.00727625	0	0.00295707	0.033797	1.15598e-17	0.0311856	0.00642939	0.00912532	0.00728749	0	0.00440641	0	0	0.0431932	9.62714e-19	0.0605324	0	8.14386e-19	0.0478771	0.0616043	0.00388263	1.79418e-19	0.00129605	0	0.0097524	0.0123605	0.000823228	0.00286798	2.04984e-18	0.0667128	0	0	0	0.0719384	0.00600267	0.00309246	0	0.00755084	1.37357e-19	0
TCGA-G9-6333-01A	0.166078	1.84438e-19	0.0274374	0	0.0359676	1.34765e-19	0	1.68344e-18	0	0	0	0	0.0229077	1.18933e-19	0.0182011	0.0249065	1.40354e-18	0.00147823	5.95683e-05	0.00529377	0.0151222	2.6738e-18	0.0366532	7.69057e-21	0.102618	0	0.00131643	0.0823739	5.46291e-19	0.0113569	0.0147425	0.0102549	0.00668088	0.00603266	0.00876975	0.00210084	0.0027927	6.71217e-19	0.0183013	0.0223963	1.55204e-18	3.48791e-19	0.155374	0.0186613	0.00278756	1.11772e-19	0.00551229	0	5.54708e-18
TCGA-G9-6336-01A	0.115781	0	0.060733	0	1.40874e-19	0	2.72307e-18	3.52535e-18	1.15891e-18	4.36966e-19	0	1.96834e-18	0.0107961	2.33626e-18	0.0492243	0.0390868	0.00047199	0.010719	0	0.00857623	0.00289982	0	0.0860241	9.63911e-19	0.0357139	2.98903e-18	9.81128e-20	0.0995644	0.0432321	0.0319683	0.00219548	0.00539673	3.02469e-20	0.0102907	0	0.00103568	0.000955944	5.60446e-18	0.0313221	0.0402957	3.39563e-18	0	0.0440883	0.00920309	0.000706792	0	0.00742743	7.27996e-19	1.6962e-18
TCGA-G9-6338-01A	0.0995111	0	0.0573592	1.27706e-17	0	0	2.70268e-18	0	0	0	3.85076e-18	0	0	0	0.00649144	0.0604447	2.80542e-17	0.010772	1.43164e-20	6.15126e-22	0.0701241	0	0.0126695	8.18344e-20	0.098214	0	9.0077e-19	0.244596	0.0739393	0	0.0615062	0	0.00161907	0	0	0.0066548	3.32831e-19	0	0.0354692	0.0176354	1.30805e-17	0	2.83609e-18	0.0578588	0.296312	3.47282e-18	0.00790115	0	3.50665e-18
TCGA-G9-6339-01A	0.0953631	0	0.00286288	0	0.0112765	0.000193618	4.66633e-19	0	0.000279419	0.020992	8.3388e-21	0.00277936	0.0537635	4.40053e-19	0.00914445	0.0131329	0.0107331	0.00855016	0	0.00090864	0.00375408	0.00115615	0.0796275	0	0.0371908	0	5.3898e-19	0.0627139	8.94679e-20	0.0283087	0.00548109	4.89305e-19	9.73966e-19	0.00279279	0.00232076	0	0.00176445	4.16059e-18	0.0325642	0.0145044	4.96626e-18	0	0.126614	0.0151224	0.00572844	3.09543e-18	0.00583182	0	0
TCGA-G9-6342-01A	0.0553831	0	3.42228e-19	0	3.33192e-18	0	0	3.1151e-18	0.0124745	0.0010852	6.96128e-19	0	0.0159101	5.63702e-18	0.0127046	0.0190804	0.00372252	0.00663374	1.0533e-18	0.00329237	0.0414375	0	0.0648376	0	0.0153933	0	1.29668e-20	0.132722	0.0541945	0.0160684	0.0121823	0.00419505	0	0.005498	0.00119509	0.00257393	0.00322985	0	0.0342255	0.00424012	1.43065e-19	4.69594e-19	0.137379	0.0342525	0.0054634	0	0.0092367	1.30012e-19	0
TCGA-G9-6343-01A	0.0724619	0.000448976	0	7.55051e-19	0.0369761	0	5.99071e-19	3.1449e-18	0.00359773	0.00403606	0.00204275	0	0.00062757	1.58307e-18	0.00914493	0.000201912	0	0.00395386	2.66416e-21	0	0.034092	7.4752e-20	0.0353436	1.21071e-19	0.0936448	0	9.33397e-05	0.0818933	0.0343754	0.00453065	0.0214178	0.00362644	0.00577854	0.00319257	0.00362415	0.00249467	0.000362981	2.95404e-18	0.0358553	3.11947e-21	4.44828e-18	0	0.207945	0.0343725	0.084053	0	0.00441738	4.43675e-20	0
TCGA-G9-6347-01A	0.2575	0.00464982	0.111591	0.0465679	0.042242	0	0	1.11169e-18	0	0.0525252	0.00501955	0	0.0156461	9.30641e-19	0.0400067	0.0497189	2.26697e-18	8.71449e-21	0.00200269	0.0187114	0.0620153	4.59454e-18	0.0245336	3.43829e-19	0.221173	4.19394e-18	0	0.305145	0.209537	0.00482151	0.047658	0.0100075	0.0184886	0.00471028	0	0.00200839	0.00287379	0.0491889	0.0786047	0.0264005	7.01093e-18	0	0.204481	0.0735116	0.160881	1.95085e-18	0.00854506	0	0
TCGA-G9-6348-01A	0.162613	0.00259624	0.0599117	0	4.60823e-19	0.00252909	0	9.47256e-19	0	0.0172165	0	8.79607e-19	0.0464721	0	0.0527061	0.0554558	0	0.0082553	0	0.0068835	0.0783417	0.00745585	0.0701915	0	0.0743641	0.00384201	0	0.181199	0.0418691	0.0192005	0.033289	0.00861362	0.000688226	0.0142098	0.000631891	0.00749188	0.00053444	4.50055e-18	0.0360431	0.0203088	1.73858e-19	6.94328e-19	0.0469671	0.0463136	0.00139918	1.36101e-18	0.0087129	0	2.06535e-18
TCGA-G9-6351-01A	0.0167192	1.38823e-20	0.00204157	1.79531e-18	0.00021425	5.51835e-20	1.31176e-18	0	0	0	1.19419e-19	3.79108e-19	0.0235173	0	0.0150153	0.0264398	0.00207818	0.00840545	0	0.00140557	0.0130955	2.11525e-05	0.0588098	2.65877e-19	0.0776427	0	1.76186e-18	0.0862223	0.0290097	0.0154975	0.00271677	0.00012057	0	0.00190078	0.00190937	0.00198168	0.00152636	0	0.0313827	0.0201695	2.1487e-18	2.64189e-19	0.0871077	0.0122953	0.00572781	0	0.0100997	5.31267e-20	0
TCGA-G9-6353-01A	0.0453636	1.66555e-06	0.0670376	0	2.7281e-19	1.40584e-18	1.37183e-18	6.72152e-18	0.00614892	0	5.53995e-19	0	0.00155605	0	0.020362	0.0253747	1.4553e-18	0.00687205	0.00184889	0.00053214	0.0533386	0.00232014	0.0453248	7.17513e-20	0.107129	6.10951e-19	0.000430058	0.150773	0.0278135	0.0175982	0.0339426	5.03095e-19	0	0.000284368	0.00220013	0.00391293	0.000941252	0	0.0361449	0.0287836	8.16127e-18	6.20602e-19	0.148649	0.0425784	0.0096774	6.56942e-18	0.00956248	0	1.14641e-18
TCGA-G9-6354-01A	0.0571015	0	5.3614e-19	0	0.0346443	8.33773e-06	0	1.86574e-18	0.0236828	0.0220829	0.00296548	7.43649e-21	0.0339959	0	0.0059119	0.00363295	0.00331296	0.0102293	0	0.00561587	0.00827133	0.00175382	0.0479663	0	0.0448189	0	2.11985e-18	0.0614298	0.0817336	0.010151	0.00407811	0.00528346	1.16288e-18	0.0117578	0.00527015	0.000499127	0.00358554	0	0.042921	0.00978427	0	4.88549e-18	0.081958	0.0183516	0.00431841	7.22942e-19	0.00924939	3.67549e-19	1.07634e-17
TCGA-G9-6356-01A	0.178628	0	0.0887022	2.12919e-19	0	0.00123803	0	3.75356e-18	0	0.00417022	1.07144e-19	0.00345025	0.0426368	8.75151e-18	0.0758869	0.0599069	0.000765602	0.00558479	0.000366717	0.0146295	0.0456561	0.00711737	0.0759546	2.42083e-20	0.0677531	0.00180929	3.40129e-19	0.159863	0.0773402	0.0280538	0.0138217	0.00986657	0.00323943	0.0152055	0.00198323	0.00379222	9.57643e-21	6.64037e-18	0.0392194	0.035392	0	1.26241e-19	3.07408e-18	0.0286327	0.00261609	0	0.0120649	0	2.20442e-19
TCGA-G9-6361-01A	0.0372751	0.000880924	0.0612201	0	0	9.02133e-19	0	1.36061e-17	0	0	0	0	0.0030165	1.50997e-17	0.0141934	0.0950147	0.000859023	0.00781805	1.29353e-18	0.00716529	0.0511632	0	0.0333587	0	0.15553	0	2.30418e-20	0.221715	0.167096	0.00202715	0.0241935	3.37135e-19	0	0.0042825	0	0.0100308	0.00205613	2.14281e-18	0.044063	0.0222792	0	6.91556e-19	0.0415596	0.0424961	0.0135796	0	0.0139427	2.86967e-18	0
TCGA-G9-6362-01A	0.165434	0	3.77286e-18	0	0.0373184	0.000219043	0	1.12131e-18	4.53222e-20	0	0	1.84869e-18	0.0212642	0	0.0312991	0.0231236	3.66458e-19	0.0144066	1.6355e-19	0.00977358	0.0955863	0	0.0300468	6.62417e-19	0.0953688	4.6687e-18	9.1797e-19	0.165894	0.0979748	0.000427184	0.0466704	0.00398081	0.000659704	0.0107077	0.00540483	0.00265903	0.00302242	9.2474e-18	0.0127738	0.0276125	3.15546e-18	1.26764e-19	0.0537746	0.0532713	0.0167816	1.75369e-18	0.0110242	0	4.10743e-18
TCGA-G9-6363-01A	0.112046	0	2.34287e-19	0	0	0.0236198	0	0	1.6548e-19	0	0.00323864	0	0.0322616	7.70358e-19	0.0528923	0.0738352	0	0.0336188	0	0.016344	0.015503	5.56808e-18	0.0314922	0	0.0831426	0	0	0.165455	0.163226	0.00426751	0.00680619	0.00590555	4.03509e-18	0.00947415	0	0.00335268	1.68329e-18	0	0.0819181	0.00789292	6.07294e-18	7.0094e-18	0	0.0110932	0.0385779	2.57646e-19	0.0127934	3.13268e-18	1.48927e-18
TCGA-G9-6364-01A	0.0618958	0	0.0617341	8.97705e-20	0	5.47335e-19	2.29381e-18	0	0	0	4.91371e-19	0	0.0161038	2.10155e-18	0.0333517	0.0758972	0	0.00334423	0	0.0111972	0.0201325	0.0115441	0.0245571	0	0.158267	0	6.07194e-20	0.12776	0.166806	0.000758426	0.00424855	0.00282159	0	0.00726862	0.005549	0.00317528	1.48312e-18	1.03026e-17	0.0367521	0.0372976	4.91249e-18	0	3.47404e-19	0.0114958	0.0158547	0	0.0166743	0	0
TCGA-G9-6365-01A	0.107826	0.00226568	0.0986352	0	0	0	2.18114e-18	9.18402e-18	3.99796e-18	7.55508e-18	0	4.27929e-18	0.0158227	0	0.0345683	0.113794	2.28296e-19	0.0151832	0	0.00245629	0.0507228	0	0.0690093	9.72128e-19	0.184926	0	0	0.286396	0.0390394	0.0193916	0.0154101	0	0	0.000352436	0	0.00738231	0.00286478	0	0.0501483	0.0662302	1.71563e-17	4.70881e-19	0.0182275	0.0336428	0.00616094	0	0.0145579	0	2.01444e-18
TCGA-G9-6366-01A	0.0502467	6.56355e-20	2.73783e-19	1.9565e-19	0.0435914	0.00141154	0	9.9444e-19	0.00537594	0.0318107	0	0	0.0493381	0	0.00551613	0.0102457	0.0107658	0.00962913	3.82617e-18	0.00138311	0.0219541	0	0.0302308	0	0.0239716	0	8.65366e-20	0.0407941	1.51968e-19	0.0037232	0.00917804	0.00308661	1.98848e-18	0.0072225	0.0101538	0.000686328	0.00373438	4.40474e-19	0.0328598	0	0	8.13727e-18	0.0845247	0.0168206	0.00661764	1.49694e-18	0.00545846	5.59594e-19	2.86487e-18
TCGA-G9-6367-01A	0.0773276	0.00151498	0.0689846	0	0.00940916	2.99782e-20	1.84785e-18	2.96513e-18	1.16722e-18	0.00454089	0	3.48735e-19	0.0181155	0	0.0483889	0.0248732	0.00351495	0.00494812	0.00224849	0.00199601	0.0105159	2.25587e-20	0.0575555	8.77021e-20	0.140488	4.70709e-19	0.000700083	0.121633	1.32174e-18	0.0255012	0.00110316	0	0	0.000134727	0.00459067	0.00138377	0.000294559	0	0.0221578	0.0324347	7.34505e-20	3.72019e-19	0.0114437	0.00603127	0.0116364	1.8062e-18	0.00897075	0	0
TCGA-G9-6369-01A	0.0889293	2.05248e-19	0	4.66382e-18	0.0226028	2.01453e-19	0	0	0	0	0	4.97498e-19	0.0135733	8.59154e-19	0.00785577	0	0	0.00790027	8.86606e-19	0.000227	0.0320185	3.94142e-18	0.020211	0	0.0498896	0	6.26376e-18	0.0970934	0.0145394	2.7955e-21	0.020588	3.39484e-20	2.7816e-21	0.00273622	0.00488983	0.00308482	0.00549727	2.40361e-18	0.0304506	0	0	8.22367e-18	0.291199	0.0335654	0.00484365	3.82804e-18	0.00513601	0	2.52206e-17
TCGA-G9-6370-01A	0.142319	0.000342346	0.0812646	3.28646e-19	1.07844e-18	0	6.14877e-20	2.34568e-18	0	0	0	2.71584e-19	0.0277267	2.31199e-18	0.057245	0.0386169	0	0.00769425	0.00088859	0.00614217	0.0236593	0.00346206	0.0941014	4.53736e-21	0.119833	0.0028455	0	0.139077	0.00600527	0.0530116	0.0157752	9.91087e-20	1.4605e-20	0.000401518	0.00550591	0.00625862	4.72678e-19	0	0.010339	0.0450529	2.69567e-18	5.14542e-19	1.19058e-19	0.0197931	0.00304254	1.25401e-18	0.00856415	0	0
TCGA-G9-6371-01A	0.0834453	3.08952e-19	0	0	0.0126032	0.00282273	0	0	0	0.0055174	0	0.000379763	0.0316656	0	0.0160484	2.65095e-18	0.00635351	0.0129121	0	0.00327233	0.0250696	1.7983e-06	0.0277865	8.79508e-19	0.0429214	1.63118e-18	1.94497e-19	0.045034	0.000843755	0.00554894	0.00516518	0.00599484	0	0.00901327	0.00586532	0.00103434	0.00293491	0	0.039855	3.67626e-19	2.39963e-18	5.11834e-18	0.0886234	0.0184427	0.00883171	0	0.00774509	0	0
TCGA-G9-6373-01A	0.185539	0.00133344	0.0433252	0	0.0030364	0.00509796	2.30742e-21	6.49671e-19	0.000359517	0.0145359	0	1.45637e-19	0.0341951	3.07358e-19	0.04152	0.0750929	0.0228063	0.00825824	1.69271e-18	0.0147005	0.0224384	0	0.0489528	0	0.107392	0	0	0.159517	0.112965	0.00558813	0.00954959	0.00559282	0	0.00713567	0.00474339	0.00398065	0.000946573	0	0.0464796	0.0140976	2.85465e-19	7.25763e-19	0.136846	0.0243789	0.00679439	0	0.00932729	4.59976e-20	0
TCGA-G9-6377-01A	0.166495	0	0.0144372	0.00145064	0	0.00976813	4.13742e-18	5.43648e-21	0.00860193	0.0395556	0	0.00115475	0.0366854	0	0.0390463	0.0518679	0.00729465	0.0122902	1.10094e-18	0.0158169	0.00990363	0.00875517	0.0646809	1.14029e-19	0.0793052	0	1.15406e-19	0.0956265	0.0843446	0.0138732	0.00368477	0.00586742	0	0.0132092	0.00175584	0.00117813	0.00250737	0	0.0345868	0.0150365	0	4.99049e-20	0.017442	0.0149791	0.000855921	0	0.00424664	2.55815e-18	2.80947e-18
TCGA-G9-6378-01A	0.101375	0.00667155	0.0956508	1.48717e-18	0	6.90801e-19	0	4.64841e-18	2.50918e-18	0	0.00577448	0	0.0151711	2.30418e-18	0.0196701	0.0603345	0	0.00768298	0.0030246	0.00150788	0.0157989	2.13641e-19	0.0223887	0	0.200676	0.00768838	0	0.248463	0.0315197	0.01159	0.00447354	9.23492e-21	0.00197658	7.26168e-20	0.00838204	0.000710063	3.66781e-21	0	0.056106	0.014182	0	1.03519e-18	0.016581	0.0118988	0.071304	0	0.00923566	1.75149e-19	0
TCGA-G9-6379-01A	0.31101	3.47189e-20	0.0687346	0.0279521	0.0102618	8.91747e-20	0.00824666	3.06958e-18	0.00968357	0.0600865	1.49135e-18	0	0.0436595	0	0.171899	0.0247407	7.19456e-19	0	0.00268298	0.0302232	0.0786985	0	0.0858787	5.11487e-21	0.0561065	6.12451e-18	0	0.225558	0.249001	0.0462634	0.0594758	0.00133461	0.00302415	0.0233773	0	0.00254022	7.88743e-06	0.0416815	0.0529962	0.0287599	1.20166e-19	1.42193e-18	0.220173	0.0838663	0.00149917	7.34134e-19	0.00449648	3.31042e-19	0
TCGA-G9-6384-01A	0.136955	1.15967e-21	0.0352929	2.02349e-19	5.8772e-20	0.00707217	0	0	0.000916628	0	3.78502e-21	0	0.031782	0	0.0733731	0.03572	0.0233702	0.00854257	0	0.00967134	0.0525845	0.000313286	0.0505963	0	0.0912488	0.013844	0.00113973	0.130717	0.090094	0.0123392	0.0250028	4.21538e-20	4.51956e-19	0.00057042	0.00928885	0.0050865	0.00168072	0	0.0158918	0.01813	0	2.41127e-19	0.0292477	0.0302979	0.00386102	0	0.00693445	0.00105252	1.96397e-19
TCGA-G9-6385-01A	0.0778406	0.00249769	0.0746625	0	0.00045079	1.10967e-19	1.11095e-18	6.75727e-18	1.94609e-18	1.65349e-19	0	6.28014e-18	0.0128186	4.15389e-18	0.0224	0.0552535	1.07349e-17	0.00660646	4.78742e-05	0.00170383	0.0105331	0.00207897	0.063165	6.47429e-21	0.119873	6.03218e-19	0.00114208	0.171876	0.00574828	0.0288265	0.00238766	0.000915531	0.000521934	0.0014289	0.00179957	0.00203914	0.000234893	0	0.0406106	0.021273	1.92792e-19	5.13002e-19	0.00116309	0.00941885	0.0053976	1.38911e-18	0.00866388	0	0
TCGA-G9-6494-01A	0.0494215	0	0.00387773	0	1.43745e-18	0.00220535	0	0	3.29357e-20	0.011618	4.81846e-20	0	0.0461879	0	0.0188317	0.0456675	0.00406212	0.00865562	0.0023281	0.00324873	0.0152349	0.011339	0.0260245	0	0.158074	0.00100977	0	0.119232	0.0123105	0.00530117	0.00481224	0.00758176	0.000724721	0.00765887	0.0130513	0.00297636	0.00724744	6.40652e-19	0.0275777	0.004166	9.87394e-19	3.72945e-19	0.0656996	0.0109831	0.00700238	7.77304e-19	0.00892753	0	2.66057e-18
TCGA-G9-6496-01A	0.10194	0	0.0515513	0	0.0146561	0	0	4.87822e-18	0	4.02747e-18	1.61096e-19	0	0.00355976	2.51489e-18	0.0145838	0.0353701	0	0.0034908	2.62203e-19	0.000529844	0.0944068	6.92278e-19	0.0391978	0	0.0765159	0	0.00174027	0.148844	0.0345757	0.00523193	0.044434	0.0036823	0.00419644	0.00648414	0	0.00456835	0.000374073	0	0.0202669	0.0140382	0	0	0.165376	0.0640413	0.00685172	0	0.00293968	0	6.16061e-19
TCGA-G9-6498-01A	0.335967	0.00101067	0.038593	0.0597208	0	0.00600405	0.0122471	9.73701e-19	0	0.0343241	4.23498e-20	0.0171644	0.0893605	0	0.0606635	0.051881	0.0269645	0.00416855	0.00149114	0.0245594	0.0798641	4.66824e-20	0.0625169	1.06876e-21	0.261936	0.00762491	0.0012426	0.30601	0.160834	0.0142785	0.0449526	0	0.00266316	0.00440871	0.000646167	0.00494242	6.19095e-05	0.0328447	0.0355036	0.0313254	0	5.88409e-19	0.031244	0.0594617	0.00350087	0	0.00709456	0	0
TCGA-G9-6499-01A	0.091962	0	0.00688528	0.00786499	0.0238561	0.00128702	0	8.54701e-19	0.000694997	0.00748112	0	0	0.0330788	2.71083e-18	0.0395235	1.88037e-18	0.0056954	0.00888461	1.81911e-18	0.00315658	0.00673853	0	0.0528669	0	0.0259544	2.31084e-18	6.27011e-19	0.0242669	0.00635373	0.00900571	0.00512692	0.00812218	2.6383e-20	0.0112724	0.00251185	0.000890677	0.000988864	4.48272e-19	0.0359722	1.1272e-18	0	0	0.0891471	0.0114945	0.00240838	0	0.00478001	4.15291e-21	4.38398e-19
TCGA-G9-7509-01A	0.0143884	3.27861e-20	0.0280909	0	0	1.14883e-20	0	3.49823e-18	0.0110733	0.00954149	0.000215858	0	0.0190729	2.57672e-18	0.0172344	0.0473154	0.00412866	0.00659586	0.000794444	0.00199142	0.0187825	0.000522286	0.0318879	0	0.0711165	0	0.00111191	0.116276	0.0339755	0.00887399	0.00814774	0	1.3728e-19	2.27584e-20	0.00837718	0.00119634	0.00138041	2.28995e-18	0.0285611	0.00942443	0	3.08002e-19	0.0214689	0.0195103	0.00587421	0	0.0100482	8.53586e-20	1.32408e-18
TCGA-G9-7510-01A	0.164195	0.00168555	0.0787525	9.43477e-19	2.4564e-20	3.88183e-19	0	6.1727e-18	1.21748e-20	0.0107391	1.65497e-19	3.15322e-18	0.0106763	1.05527e-18	0.0288447	0.0479616	0	0.00781958	7.45087e-21	0.00871159	0.0584195	0.00123266	0.0616822	0	0.102404	6.58872e-20	0.0013898	0.170302	0.0355247	0.0173167	0.0394523	0.00819266	0.00603775	0.00628335	0.00275803	0.00613819	0.00119961	4.86571e-18	0.025537	0.0183353	1.61781e-18	6.97505e-19	0.0400987	0.0427176	0.00286346	1.87069e-18	0.00436782	0.000394675	0
TCGA-G9-7519-01A	0.0584641	0.00143407	0.0208886	9.28038e-23	0.0268926	1.86392e-20	2.37363e-19	1.71433e-18	0	5.90657e-19	0.00165489	0	0.0153853	0	0.020214	0.0067436	2.82442e-19	0.0117755	0.00214349	0.00520765	0.0142658	0	0.0186798	4.2783e-19	0.118121	0	1.24397e-18	0.100848	0.13282	0.00239338	0.0113246	0.00896688	0.00502232	0.0074004	0.00769403	0.000757224	0.00083233	3.63636e-20	0.0364737	0	0	0	0.191649	0.0187249	0.0869209	4.46993e-19	0.00528062	5.6737e-20	0
TCGA-G9-7521-01A	0.279767	1.2968e-20	0.057207	0.0310174	0.0384352	0.0310543	4.37899e-19	0.00129695	1.45967e-19	0.0230355	0.00418767	0.0484404	0.113553	0	0.0597292	0.0642967	0.00869211	0.0171032	0	0.0198705	0.00739306	0	0.0177821	0	0.0484387	0.0292919	1.30218e-20	0.0994088	0.0223308	0.000306137	0.0038359	0.0210503	0.0139377	0.0152146	0.0251387	0.000503256	0.00504851	0.0072513	0.0109813	0.00254001	2.63332e-19	1.55762e-19	0.0473329	0.00248047	0.081837	0.00242986	0.00403553	0	3.43866e-19
TCGA-G9-7522-01A	0.1443	6.85286e-20	0.039761	0	1.89359e-18	0.00137307	0	4.08134e-18	6.54924e-19	0.0107217	1.80084e-20	0	0.0300159	8.08969e-18	0.049856	0.037596	5.98594e-20	0.00753845	0	0.0121072	0.0343203	0.0085231	0.0422203	5.29188e-20	0.0532992	0.0051621	0	0.13123	0.0652492	0.0114668	0.0207387	0.0105593	0	0.0148683	0.00540051	0.00429671	0.00303264	1.16668e-18	0.0244443	0.01343	0	2.10654e-19	0.0731954	0.0314122	0.0117748	1.75129e-19	0.00962448	0	0
TCGA-G9-7523-01A	0.369015	0	0.192293	0	7.8295e-18	0	0	6.10199e-18	1.72576e-18	3.463e-18	0.00018832	0	0.0324482	2.9185e-18	0.234909	0.156829	0	1.40608e-20	0.0018075	0.0454977	0.139214	9.31207e-18	1.78395e-19	7.97565e-23	0.292239	0.0330664	0	0.485013	0.232613	0	0.0774803	0.0125666	0.0220319	0.000843409	1.54921e-18	0.00902442	0	4.00195e-18	0.04292	0.0324847	1.42114e-17	1.25692e-18	0	0.07291	0.198065	9.03321e-18	0.0100851	0	2.83854e-17
TCGA-G9-7525-01A	0.0986485	1.14344e-19	0.0426121	0	0.00427622	1.8865e-19	8.03915e-19	0	0	2.86699e-18	3.87912e-20	2.04957e-18	0.00676354	0	0.0231028	0.0891611	0	0.0119485	1.61303e-19	0.0177763	0.0162449	0.00016476	0.0392019	0	0.0554103	6.23091e-19	9.33462e-22	0.141706	0.130804	0.00327875	0.00141208	0.00949588	6.34039e-19	0.0151796	0.00555315	0.00324266	0.00961758	0	0.05714	0.00376932	0	0	0.19327	0.015835	0.00707347	7.54266e-18	0.00889684	0.000533944	8.3232e-18
TCGA-G9-A9S0-01A	0.170848	4.65204e-20	0.0136176	0.0152173	0	0.0121571	0	4.67489e-19	0	0.0438272	0	0.021039	0.0484128	1.38752e-18	0.0970901	0.0264198	0.012755	0.0128204	0	0.0192649	0.000670972	3.35703e-19	0.0414583	0	0.00189163	1.86063e-18	2.03242e-19	0.0326857	0.126529	0.00479107	2.00412e-19	0.00903354	0.00317671	0.0103525	0.00643119	0.000183527	0.00378697	0.000576327	0.0578917	0	0	4.7378e-18	0.106513	0.00822432	0.00274808	1.15869e-18	0.00243492	3.76471e-20	7.0919e-19
TCGA-G9-A9S7-01A	0.127418	1.45368e-19	5.23738e-18	0.00595852	0.00195114	0.00900397	0	1.72194e-19	0.031104	0.0322914	0	0.00609678	0.0403851	0	0.0285751	0.0198405	0.0117112	0.0123046	1.38396e-18	0.00620857	0	8.8608e-20	0.0505973	0	0	0	5.48409e-19	0.0586012	0	0.00819092	4.24852e-20	0.000256177	6.56003e-21	0.00596836	0.00687525	3.91467e-20	0.00349686	0	0.0537355	0.00619512	0	0	0.0987541	0.00794235	0.0016235	3.8154e-18	0.0047896	4.83449e-19	0
TCGA-H9-7775-01A	7.13692e-20	0	0.0143365	1.95633e-18	1.03068e-18	0.00106105	0	2.93875e-19	0.00427497	0.00974345	9.82718e-23	5.52833e-19	0.0156889	3.08254e-19	0.0229382	0.0337575	0.00504624	0.00910518	0.000767244	0.00842657	0.0321713	0.00603096	0.0276084	4.71108e-21	0.148256	0	0.000963234	0.11173	0.151147	0.0024422	0.00838079	0.00532725	0	0.00734155	0.0120995	0.00343802	0.00741082	0	0.0251872	0.0129755	5.87371e-20	2.75658e-19	0.0228383	0.0235301	0.0027272	3.62159e-18	0.0101824	2.68708e-19	2.52945e-18
TCGA-H9-A6BX-01A	0.209331	0.00628772	0.167982	1.31481e-18	0	4.55248e-18	0.00133922	0	0.00537568	0	0	0	0.00539557	3.68625e-18	0.0601504	0.0650709	0	0.00638972	0.00391177	0.00902379	0.050563	3.00686e-19	0.0490155	0	0.226584	0.0139705	0	0.264375	0.0482357	0.0254605	0.0190927	0.00190911	0.00566371	1.05884e-19	0.0015331	0.00438276	0	6.40885e-18	0.0352659	0.039244	0	9.95443e-19	0.0443827	0.0360369	0.0116936	0	0.0101101	5.92626e-19	4.08508e-19
TCGA-H9-A6BY-01A	0.000661552	0.00241596	0	0	0.0296878	5.86158e-20	0	4.22404e-18	0.00312879	0	0.00208908	1.95917e-18	0	0	0.000932005	0.0330603	4.21527e-19	0.00885271	8.34257e-19	0	0.00250746	0	0.04172	0	0.0771663	0	0	0.142965	0.0496313	0.00586123	0.000790795	0	0	0	0.00123395	0.00120905	0.00149486	3.58787e-18	0.0859417	0.0160987	8.20037e-18	0	0.190984	0.0200758	0.012373	1.81878e-18	0.00973462	1.04028e-18	0
TCGA-HC-7075-01A	0.138411	1.28066e-19	2.71567e-18	0.0792748	0.0460946	0.0130615	0	0	0.0242431	0.0455576	9.80471e-20	0	0.0385446	0	0.0271495	0	0.0382147	0.00676583	0.00208519	0.00844428	0.00268285	3.44903e-19	0.0184278	0	0.050492	1.14683e-18	0	0.0189317	0.0209038	0.000163048	0.00105324	0.00214821	1.25567e-19	0.0035604	0.016007	0.00198968	0.00193449	0.0221575	0.0306893	0	4.36017e-19	1.39267e-18	0.0578701	0.00291399	0.0181724	0.00557314	0.0010513	0	0
TCGA-HC-7077-01A	0	0	0	0.00160449	0.0121092	0.00123843	1.95495e-18	9.06057e-19	0.0110865	0.020381	4.50337e-19	1.16645e-22	0.0303489	0	0.00948849	0.0101846	0.0277429	0.00103271	0	0.00172566	2.13386e-19	0.00993704	0.0353513	8.61642e-19	0	0	0	0.0270885	0.0477015	0.00451568	0	0.00624819	0	0.00583949	0.00799033	2.71051e-20	0.00478673	4.27606e-18	0.0452607	1.71861e-18	1.36372e-18	0	0.125455	0.00231117	0.00305146	4.31503e-18	0.00389757	0	3.31705e-18
TCGA-HC-7078-01A	0.106477	0.00405977	0.0260051	2.3074e-19	0.000342911	0.00323792	6.51021e-19	1.04675e-18	0.0143497	0.015574	0	0	0.0223356	3.6353e-18	0.0238513	0.00884366	1.20097e-18	0.00666757	0.00245751	0.00947083	0.069803	0.00183325	0.046415	0	0.0609114	0.0184672	0.000132573	0.161912	0.126118	0.0129704	0.0260772	0.00714188	0.00363661	0.012192	0.0159252	0.00783251	0.000521358	0	0.0236014	0.00877178	0.00263598	6.81491e-19	0.0261809	0.0448137	0.000992422	0	0.0033411	0.000734108	5.31646e-18
TCGA-HC-7079-01A	0.421451	1.22418e-18	0.130176	0.637396	0.0153291	0.150979	0.143842	0.0875731	0.0353998	0.0986217	1.04908e-19	0.0774032	0.229365	0.014509	0.48966	0.0142397	0.166808	0	8.47917e-19	0.0895468	0.0213267	1.37984e-19	0.0419334	0	0.103851	0.0109917	0.00132902	0.0827604	0.934116	0.026472	0.00979871	0.0601346	0.060954	9.59699e-19	0.0182325	0.00330096	0	0.246011	0	0.0488937	0.0627065	0	0	0.0207377	0	0.0704951	0.00165865	2.65863e-19	1.2087e-19
TCGA-HC-7080-01A	0.0503748	0	0	6.84716e-22	0.0644475	0	0	8.47444e-19	0.0318226	0.0246608	1.95102e-19	2.27405e-19	0.00710846	4.67664e-18	0.0182232	0	0.00337891	0.00302237	0.0204749	0.00156475	0.0529253	0	0.0163283	3.51917e-20	1.91834e-18	4.47674e-19	0.000621294	0.0344963	0.0399779	0	0.0261291	0.00445424	0	0.00850379	0.026106	0.0036521	0.00158203	0	0.0605975	0	3.32937e-18	0	0.118288	0.0397183	0.00329641	1.36852e-18	0.00415247	1.46272e-19	0
TCGA-HC-7081-01A	0.0502512	0	0.11652	2.26745e-19	0	3.80272e-20	0	4.35154e-18	2.15927e-18	0.0115933	0	2.48482e-18	0.0133882	2.75329e-18	0.166523	0.134928	1.17157e-18	0	1.45005e-19	0.0361021	0.115081	0.00267863	0.0359912	0	0.0840212	0.0171575	1.48074e-20	0.277752	0.51827	0.00126729	0.0298127	0.0333515	0.0101914	0.029289	0.0048185	0.00660264	0.00518574	0	0.0165205	0.0257837	0.00555046	1.70002e-19	0.0773042	0.058728	0	0	0.0112877	0	0
TCGA-HC-7209-01A	0.0605074	0	0.00803661	1.33165e-18	0	0.00371814	0	9.91754e-19	0.00151427	0.0130544	0	0	0.018226	0	0.0588009	0.0465869	0.00678599	0.00756082	1.42302e-19	0.00918011	0.0136206	0.00438989	0.0597682	0	0.00285593	1.7023e-20	5.57571e-20	0.0829739	0.0979754	0.0107581	0.00539771	0.00822101	0.000177577	0.0101386	0.00613585	0.0033567	0.00172805	1.1436e-18	0.0268672	0.0215896	0	4.27543e-21	0.0339592	0.0119795	0.00404568	3.89769e-18	0.00552293	0	2.34372e-18
TCGA-HC-7210-01A	0.170331	5.71446e-20	0.0681721	0.00256124	0.00691345	0.0040058	0	0	0	0.0103962	0	0	0.0342984	0	0.0936518	0.0457948	0.00387488	5.79758e-20	5.43466e-20	0.012745	0.0772386	0.00491475	0.030724	0	0.109106	0.0137941	0.00106013	0.13438	0.0850514	0.00477699	0.0354745	0.00580203	0.00779563	0.00602724	0.00869787	0.00829623	0.00138867	4.67131e-19	0.000441517	0.0168587	0.0193151	2.81421e-19	0.0932558	0.0372697	7.72027e-20	3.49734e-19	0.00888173	0.000346689	0
TCGA-HC-7211-01A	0.119415	0	0.00713762	0.00547793	0.0301605	0.0116596	8.70784e-19	2.28002e-20	0.00603123	0.00758362	0	1.82618e-19	0.0207297	0	0.0678399	4.25489e-19	0.0103665	0.00301961	0.00214015	0.0103572	0.0204738	0.00680819	0.0403693	0	0.00379381	0.0276779	0	0.0192636	0.0556061	0.0119461	0.00867931	0.0021284	1.22709e-18	0.0131523	0.0204823	0.0018743	0.00117847	0	0.00821887	0	0.0224479	4.11746e-18	0.0149025	0.0115238	0.00246544	0	0.00151847	0.00112924	0
TCGA-HC-7212-01A	0.0608408	2.56447e-20	0	0	0.00819314	0.00642454	0	0	0.00524818	0	0	2.61588e-20	0.0215575	0	0.0332385	0.0539473	0.00685365	0.00140837	0.00386936	0.00544949	0.0699612	0	0.0299127	2.80948e-20	9.90203e-19	0.0114635	0.000567169	0.124805	0.0508655	0.00122215	0.0207794	0.00518135	0	0.0112153	0.0104238	0.00267128	0.00896955	0	0.0427576	0.0128555	0	3.06391e-19	0.0438616	0.0352001	0.00627882	5.7949e-18	0.00736821	0.00112694	0
TCGA-HC-7213-01A	0.107072	0.000643329	0.057782	3.0919e-18	3.07464e-19	0.00146562	0	0	7.71915e-19	0.000698018	0	7.38944e-19	0.00975815	3.58482e-19	0.0468518	0.0523159	0.0373763	0.00683278	0	0.0168005	0.0104652	0.0084432	0.053075	0.0012205	0.0303385	0.00872809	0	0.106996	0.12128	0.00851521	0.00175945	0.00552886	0.00260098	0.0058755	0.00472453	0.000648332	0.00340261	3.88866e-19	0.03609	0.0408834	1.04818e-18	0	0.115326	0.0152117	0.0112469	1.63773e-18	0.00403831	0	0
TCGA-HC-7230-01A	0.011176	1.27879e-18	0	1.79355e-18	0.0305726	0.00103805	0	1.82759e-18	0.0154717	0.000509589	0.00186858	0	0.0194817	1.57851e-19	0.0237795	6.43746e-19	0.0101083	0.00234275	0	0.00657377	0.0239443	0.00180433	0.0296251	0	0	0	2.50096e-18	0.0724867	0.0984173	0.00451809	0.00636719	0.00179059	0	0.010977	0.0145599	0.00345493	0.000680479	0	0.0462213	3.64622e-18	0	1.33835e-17	0.116725	0.0182493	0.00481154	1.07476e-19	0.00763855	1.11402e-19	8.71235e-18
TCGA-HC-7231-01A	0.169979	2.23795e-19	0	0.0150975	0.0146683	0.016148	0	1.87263e-21	0.00225552	0.0566906	0	0.0108571	0.054282	0	0.085998	0.0364272	0.0323445	0.00586568	0	0.0264631	0.00740954	0.00634716	0.0476297	0	0.00583591	0.0030536	1.0651e-18	0.0558852	0.149924	0.00761813	2.53105e-06	0.00741167	0.000605248	0.00649294	0.0100226	0.00285052	0.00611159	0	0.0273667	0.00176117	1.06814e-19	2.11707e-18	0.0712807	0.00619336	0.0015013	3.23847e-18	0.00633392	0	0
TCGA-HC-7232-01A	0.0217036	0.000965502	0.00851799	0	3.1261e-18	0.00255118	0	0	0	0	3.35675e-20	6.55226e-19	0.00850464	3.20064e-18	0.0372049	0.0664024	0.00646168	0.011235	5.94832e-20	0.0108961	0.0706291	0.013409	0.0402091	1.51834e-20	0.0102161	8.20261e-19	5.63231e-20	0.198271	0.199244	0.00848687	0.0179895	0.00900709	0.00142492	0.0116632	0.00367176	0.00825313	0.00103758	0	0.0374969	0.00753927	8.22505e-18	5.35623e-19	0.0464246	0.0436349	0.00719751	4.17735e-18	0.0116597	1.24877e-19	1.84677e-18
TCGA-HC-7233-01A	0.241009	3.18738e-20	0.058357	0.0072473	0	0.0235885	0	0.00543464	0.00141738	0.0425753	0	0.0134387	0.0800739	0	0.0572864	0.0424141	0.0228278	0.010777	1.81734e-19	0.0178373	0.0160046	7.10395e-20	0.0262412	0	0.0975659	0.0110101	1.231e-19	0.0789971	0.0607906	0.0020075	0.00462949	0.0200044	0.0193709	0.0164272	0.00622642	0.00144576	0.000180391	0	0.0184174	0.0164908	0.0103934	0	1.15503e-18	0.0103694	0.00439027	7.23394e-19	0.00266151	1.43723e-20	1.2148e-18
TCGA-HC-7736-01A	0.12874	0.000610126	0.0468506	0	0.020903	0.0034572	1.46158e-18	0	0.0106948	0	0	0	0.0238639	5.52673e-18	0.0568957	0.0370225	0	0.0011282	0.00308139	0.0114988	0.0415332	0	0.0568995	0	0.0839633	0.00536814	0.00105245	0.160875	0.0981217	0.0143227	0.0177194	0	0.00288408	5.98115e-20	0.00947396	0.00311382	0.000986695	0	0.0149845	0.0196346	0.00261091	7.3788e-18	0.0163174	0.0275475	0.00120079	2.63791e-18	0.00654363	0.00210226	0
TCGA-HC-7737-01A	0.226385	0	0.0519354	0.0098498	0.00350481	0.0190644	9.70961e-19	0	0.00475305	0.0429851	0	0.00674393	0.068931	0	0.0828101	0.0529267	0.0158541	0.00182446	1.81726e-20	0.0212482	0.0795594	0.00338328	0.055521	8.72678e-22	0.0981262	0.0123469	0.00125418	0.172741	0.148865	0.00865839	0.0379154	0.00978248	0.00914649	0.00583022	0.0051724	0.0092442	0.00157615	2.53781e-18	0.0145523	0.0207512	0.00474917	4.56876e-19	0.0439338	0.0413018	0.00107282	8.2121e-20	0.00430486	0.000451305	3.70215e-19
TCGA-HC-7738-01A	0.0465542	1.62062e-19	0	0.0327038	0.0158624	0.00680895	6.10168e-19	8.57416e-21	0.0163672	0.0220348	5.38457e-19	3.48568e-20	0.0269228	0	0.0180334	1.55566e-18	0.0132138	0.0085904	1.78207e-22	0.00675808	0.00110647	4.1878e-20	0.0347306	0	0.0150105	0	9.52198e-19	0	0.0912388	0.00317957	0	0.0156278	0.00221201	0.0130819	0.0156946	0	0.0075057	1.55273e-18	0.0177595	0.000399933	9.42018e-19	1.27583e-18	0.069139	0.000345702	0.00543553	5.12542e-19	0.00245376	0	0
TCGA-HC-7740-01A	0.0620719	4.32939e-20	0.0954759	0	0.000839243	0	2.78976e-18	0	0	0.000953592	4.51664e-20	0	0.0175704	0	0.0218258	0.047881	1.59894e-20	0.00303746	0.000726841	0.00211888	0.0463783	0.00536469	0.0820832	0	0.143004	0.00443496	0.0019698	0.192922	0.0443479	0.04233	0.0215989	0	0.00145533	0.00187648	0.00191547	0.00689534	1.0727e-19	0	0.00974533	0.0497162	0	4.88244e-19	0	0.0328212	0.00591479	0	0.00645788	0.00111972	7.21633e-19
TCGA-HC-7742-01A	0.0806337	3.20137e-21	0.0823555	0	4.189e-18	0	0	3.81317e-18	2.73376e-18	0	0	5.25321e-18	0.00826859	0	0.0243408	0.0444367	0.0103373	0.00812298	0	0.00261617	0.0327402	0	0.0263386	4.35186e-05	0.0891126	0.00313158	0	0.0663456	0.0271217	0.00345012	0.010699	0.00171656	0.000941499	0.00423364	0.00223196	0.00162393	0.000217746	0	0.00814251	0.0119618	0	2.04578e-19	0.0786061	0.0225044	0.0123351	2.70305e-18	0.0041555	1.07335e-18	1.25167e-18
TCGA-HC-7744-01A	0.00365271	0	7.1741e-18	1.1913e-18	0.00782943	0.00361654	7.84454e-19	0	4.3026e-19	1.43933e-18	1.23478e-19	2.38046e-18	0.0112286	2.99134e-18	0.0297779	0.0198898	0.00957651	0.0143923	6.50438e-21	0.00688251	0.0129746	0.00116526	0.0412193	6.13789e-20	0	0	0	0.0755097	0.124093	0.00459913	0.00263251	0.00247969	0	0.00660769	0.0118509	0.00404513	0.00827398	1.11815e-18	0.0411108	0.00101077	3.5403e-18	1.64658e-17	0.101893	0.0149359	0.00440502	3.62736e-19	0.00546531	3.30415e-20	7.79149e-18
TCGA-HC-7745-01A	0.248585	0.000903071	0.115531	0	4.54154e-19	0.00790552	0	1.77397e-18	0.0147203	0.0279349	0	8.8875e-23	0.0461019	0	0.125368	0.080034	3.06564e-19	0.0059198	0.000835686	0.016444	0.058172	5.12636e-20	0.0658668	0	0.106193	0.00978156	0	0.239632	0.0529939	0.0225979	0.0246048	0.000439247	0.0053822	0.00380814	0.00431885	0.00508582	0	4.567e-18	0.0277013	0.0437042	6.55609e-19	5.80236e-19	0	0.0369741	0.000594686	3.64821e-19	0.00561359	0	8.11234e-18
TCGA-HC-7747-01A	0.214414	0	0.0382082	0.0180289	4.32733e-22	0.0106184	0	5.04489e-19	3.43105e-19	0.0438101	7.05795e-20	0.0020077	0.0535954	2.12492e-18	0.0624319	0.0376984	0.0278111	0.0176185	2.04954e-19	0.0144986	0.00846415	0.000270521	0.0711969	0	0.0473732	6.5895e-19	0	0.114856	0.0333575	0.0255126	0.00581798	0.0125877	0.00551518	0.0173066	0.00206383	0.000953497	0.0015237	3.97048e-19	0.0368677	0.030613	0.000950053	1.13703e-19	0.0293076	0.0169532	0	0	0.00903767	5.95256e-19	3.65872e-18
TCGA-HC-7748-01A	0.156626	9.55975e-05	0.0664265	1.48425e-19	2.80664e-20	0.00565646	0	2.62017e-19	0.00523685	0.0201283	7.53115e-20	2.54804e-19	0.0308558	2.7886e-18	0.0361252	0.0947368	0.00217383	0.00270171	0.000348254	0.00963813	0.0233011	0.00314128	0.0396173	0	0.0947126	0.0157048	0.000918653	0.160084	0.0625331	0.00729927	0.00877981	0.00505436	0.00412442	0.00181036	0.00983995	0.0043579	0.00337524	2.57931e-18	0.0121016	0.0268758	0.00261132	2.60502e-19	0.00252403	0.0158511	0.00170317	0	0.00738815	0.000839953	9.66278e-19
TCGA-HC-7749-01A	0.0826052	0.000135676	5.90994e-19	3.10599e-19	0.014046	0.00458875	0	1.22751e-18	0.00526192	2.07266e-21	0	0	0.0180801	8.62528e-19	0.0162564	0.0471637	1.21429e-19	0.010888	0.00502791	0.0096339	0.0127839	0.000941307	0.03997	0	0.0867635	0.0185177	0.000306629	0.112159	0.101542	0.00473268	0.0017057	0.0149961	0.00467612	0.0191181	0.021146	0.00359217	0.00277649	0	0.0487011	0.00397983	7.7836e-19	4.90035e-19	0.0283896	0.0085768	0.0066513	1.6919e-18	0.00589289	0.0001125	0
TCGA-HC-7750-01A	0.085	0.0010198	0.0648209	4.55243e-19	0.00269764	1.75661e-21	0	1.87973e-18	0.000561114	0.0170826	4.841e-22	0	0.00489465	0	0.0186236	0.0210466	0.00501682	0.00539587	0.00378189	0.00306097	0.0401946	0.000382762	0.0438677	0	0.151033	0.00789144	0.00057044	0.0837384	0.0431156	0.0133151	0.0109746	0.00150132	0.000834573	4.85229e-05	0.0100201	0.00568091	0.00128104	2.36548e-18	0.0403496	0.0177671	0	0	0.0970746	0.0242792	0.0551213	0	0.00572541	1.81809e-05	1.08225e-18
TCGA-HC-7752-01A	0.101742	0	1.40408e-19	0	0.0595191	5.40801e-19	6.33153e-18	4.10042e-19	0.044127	0.0159419	1.56047e-19	5.49329e-19	0	0	0.00221918	0.0200307	0.0122166	0	0.0089129	0.00349506	0.0245194	4.97986e-21	0.0373478	4.90422e-19	0.0555368	0	1.35525e-20	0.091319	0.0616955	0.0015837	0.0193163	3.7362e-19	0	0.00665287	0.00925161	0.000880065	0.000821143	0	0.0300184	1.19208e-18	0	0	0.263304	0.0446307	0.00471472	0	0.00424346	1.30815e-19	6.64913e-19
TCGA-HC-7818-01A	0.15738	0.000343075	0.0433616	0	0.0386921	5.99357e-22	0	6.44278e-19	9.61925e-20	0.0006096	1.0302e-19	6.45119e-19	0.00615181	0	0.0451522	0.0145568	0.00859232	0.00983992	6.17459e-19	0.0106841	0.0336713	0.000494329	0.0550996	0	0.031635	0.000471846	0	0.0542605	0.0863746	0.010762	0.0180484	0.00816121	0	0.0174829	0.00570115	0.00674749	0.00163954	8.27354e-19	0.0228525	0.0131332	0.0196146	6.62536e-19	0.0229205	0.0323032	0.00464496	2.49223e-18	0.00234915	0.000461325	0
TCGA-HC-7819-01A	0.0516757	0	4.31955e-18	9.60445e-20	0.0183883	0.00707896	2.63401e-18	1.0345e-18	0.0220158	0.00984636	0.00206921	0	0.0194765	5.51307e-18	0.0139234	0.00701072	0.00893962	0.0132353	4.60729e-20	0.00229227	0.0200968	6.74149e-22	0.0258081	2.17544e-19	0.00397892	0	0	0.0468719	0.00818454	0.00226271	0.00771173	0.00495431	1.33029e-19	0.00679094	0.00805018	0.00216515	0.00398087	0	0.0375247	1.99761e-18	0	0	0.00483402	0.0180114	0.00462854	0	0.00540153	0	0
TCGA-HC-7820-01A	0.0324664	0	1.57067e-18	0.00187475	0.00786846	0.00645869	3.3625e-18	1.8801e-20	0.0252993	0.0355722	0	0.00217177	0.032704	0	0.0109952	0.0180707	0.0187364	0.00822821	0	0.00362351	0.00573207	0.00137286	0.0360176	0	0.0378519	0	0	0.0452784	0.0582167	0.00944714	0.000847005	0.00474147	0	0.00720316	0.00891289	0.00106725	0.00580746	0	0.0334535	0.010234	2.186e-18	2.5968e-19	0.0647306	0.0066514	0.00298647	0	0.00471487	0	3.06794e-18
TCGA-HC-7821-01A	0.22279	0	0.0620032	0.0442704	9.68669e-05	0.0145127	0	0	0.0485678	0.010633	1.00363e-20	0.000306949	0.0366348	4.74892e-19	0.0234367	0.106554	0.0402419	0.00221302	1.01349e-21	0.00853674	0.0373532	0.000514603	0.00895283	1.82152e-20	0.079363	0.00434376	0.000905316	0.15986	2.75086e-18	3.43537e-21	0.0115516	0.013891	0.00768593	0.0240078	0.00736893	0.00350044	0.00241078	0	0.0196393	0.0113587	0.00510025	3.76955e-19	0.0351707	0.0258684	0.00032083	0	0.00763381	0.00146012	0
TCGA-HC-8213-01A	0.00300038	0	2.78649e-18	5.38272e-20	1.14595e-20	0.0117104	1.90334e-19	0	0.0129734	0.00938006	0	0.00238155	0.0281968	0	0.0104356	0.00135479	0.00788206	0.0291549	0	0.00407063	0.00517143	0.00476534	0.0330926	4.63257e-19	0.00106043	0	1.9523e-18	0.0637578	0.0925419	0.00412805	0.0027448	0.00647102	0	0.00815561	0.0118704	0.00213721	0.00197779	0	0.0421637	0	0	0	0.0155201	0.0091156	0.00510427	0	0.00769947	0	5.60176e-19
TCGA-HC-8216-01A	0.1465	7.10941e-20	0.021042	0.00619847	0.0016774	0.0265322	0	0	2.76759e-21	0.000760008	0	0.00497351	0.0511952	0	0.0465174	5.53089e-20	4.7739e-20	0.0195291	5.76746e-19	0.0145488	0.0223953	7.55319e-19	0.0431668	4.59624e-05	0.0772714	0.0153194	1.9165e-19	0.109931	0.124761	0.00852976	0.00874369	0.0293032	0.0159778	0.0168718	0.0117279	0.00198692	0.00100046	2.37843e-18	0.0206244	0	0.000700755	0	0.0495663	0.013939	0.00246403	5.80952e-19	0.00336986	4.20465e-20	2.84665e-18
TCGA-HC-8256-01A	0.0826897	0	9.99588e-19	0.0168391	0.0243922	0.0100771	0	0	0.00916782	0.0196249	0	0.012231	0.0426507	7.38856e-19	0.0150125	0	0.0120948	0.0101171	0.00294622	0.00327529	0.00722062	7.98782e-20	0.0231125	0	0.0223368	0.001086	6.50801e-19	0.0134627	0.0326019	0.00454604	0.00143589	0.00671713	1.04195e-20	0.0079277	0.0146285	0	0.000790822	1.44786e-18	0.0345135	0	0	0	0.0542823	0.00719396	0.00316003	5.24723e-19	0.00301614	3.48855e-20	5.85041e-19
TCGA-HC-8257-01A	0.141313	0	2.68588e-20	7.16132e-20	0.0202001	0.00612976	0	1.43287e-18	0.00927963	0.0141304	0.00381557	0.010762	0.0360615	0	0.0179163	0.0441039	0.00193203	0.0167393	4.25274e-19	0.00657299	0.0200031	0.00556175	0.0302183	5.77823e-20	0.043722	2.36946e-18	0.000867695	0.142844	0.0256428	0.00619059	0.00464908	0.000650389	6.29397e-21	0.00430881	0.00822613	0.00474119	0	0	0.0603516	0.00242374	1.44647e-18	4.72491e-19	7.99821e-19	0.0179557	0.00115397	1.69969e-19	0.0135384	0	8.98153e-19
TCGA-HC-8258-01A	0.0939084	0.000688129	0.0288651	5.31138e-20	0.0168757	4.09655e-22	0	5.21242e-20	0.00994185	0.0329179	0.000858833	1.48382e-19	0.0206853	3.17867e-19	0.0312656	0.00573456	0.00818	0.00385971	0	0.00357296	0.00964724	2.1292e-05	0.0772148	4.06481e-21	0.0351213	0	0.00156858	0.128129	0.0174104	0.0336686	0.00601177	0.00115749	0	0.0030226	0.00225584	0.00248775	0.00231739	4.99822e-18	0.0333477	0.0221764	0	3.64187e-19	0.0558672	0.0148336	1.76534e-18	0	0.00487821	0	4.58771e-18
TCGA-HC-8259-01A	0	0	1.19398e-18	0.0044079	0.0319726	0.00100057	2.44564e-18	3.41825e-19	0.0208377	0.00809527	0.00120343	4.21618e-19	0.0173296	0	0.0200412	0.0188911	0.0091727	0.00890073	0	0.00756666	0.00626892	6.83779e-19	0.0246861	1.21134e-18	0.00970507	0	4.93897e-19	0.0373756	0.135548	0.00113478	0.000428523	0.000177423	0	0.00367402	0.00731896	0.000917798	0.00141237	0	0.0396121	5.20822e-20	0	2.26729e-18	0.0328993	0.00740568	0.00622947	7.51632e-19	0.00488572	0	3.23826e-18
TCGA-HC-8260-01A	0.109409	0	0.0340185	0	5.64101e-19	0.00141616	0	8.33529e-19	0.0187093	0.00631032	0.0010968	1.21337e-19	0.0188183	0	0.0611551	0.0572372	0.000612313	0.0205118	0	0.00768586	0.0180091	0	0.059414	0	0.0113776	0.0036609	0	0.183152	0.0446566	0.0253253	0.0101619	0	7.2905e-19	0.00216059	0.00231858	0.00282943	0.000884088	0	0.0313715	0.0118367	6.44926e-18	2.7094e-19	0.057448	0.0251347	0.00133685	2.92588e-18	0.00616781	5.13188e-19	0
TCGA-HC-8261-01A	0.16757	0	2.1708e-18	0.0154396	0.0254028	0.00126678	0	4.71025e-20	0.00414015	0.0188316	0	1.50578e-20	0.0260009	0	0.0330155	0.0118811	0.0270974	0.00800559	0	0.00924741	0.00261548	0	0.0321529	3.01412e-19	4.61979e-19	0	0	0.0713093	0.0149167	0.00798078	0.0012398	0.0201634	0.0152118	0.00882986	0.00936617	0.00231811	0	2.16231e-18	0.0319784	0.00125944	1.52914e-19	0	0.117606	0.00392703	0.00327699	0	0.00215971	0	0
TCGA-HC-8262-01A	0.0241267	1.97112e-20	0.00666946	0.00188286	0.00250776	0.00883428	2.57846e-18	0	0.014471	0.0148585	0.00723527	0.00595404	0.0190831	2.47091e-18	0.0529676	0.0154489	0.0116256	0.0130095	5.71193e-19	0.00604119	0.00677486	0.0022746	0.0620965	6.48756e-20	0	0	0	0.0869624	0.129463	0.0221017	0.00217518	0	0	0.000236269	0.0058766	0.000557887	0.00080698	0	0.0354012	0.00739836	0	6.75023e-20	0.0356584	0.011023	0.00056869	0	0.00861834	1.35102e-20	0
TCGA-HC-8265-01A	0.108958	5.42101e-20	0.0337877	6.69352e-20	0.0251375	0.00275931	0	0	0.0313338	0.0216437	0.00092718	0.000271221	0.0224604	0	0.0232627	0.0353831	0.0109007	0.00992486	0	0.00264852	0.0134177	0	0.0531019	0	0.039384	1.83311e-18	5.08422e-20	0.0598561	0.0166967	0.0109877	0.00384973	0.00310912	0.00158282	0.00503637	0.0152828	0.00030724	0.00661618	2.33503e-18	0.0292658	0.0319494	0	2.86115e-19	0.0927006	0.0160466	0.00128811	5.28188e-19	0.00464261	1.91601e-20	0
TCGA-HC-8266-01A	0.355666	0.000885245	0.0707606	0.0964477	0	0.0471959	0.0509364	0.0194756	0.00154945	0.0763385	1.17673e-20	0.123895	0.222976	0.0112881	0.214798	0.0231746	0.0277259	0.00472978	6.35195e-19	0.0364105	0.0376504	8.59983e-19	0.0460971	0	0.0482012	0.00603924	1.02644e-21	0.107149	0.0983099	0.0170761	0.00805897	0.0176756	0.0149573	0.0120977	0.00984932	0.00831451	0	0.0277793	0.00762036	0.0130995	0.0185439	3.68047e-19	1.42105e-19	0.0257069	1.60957e-19	0	0.00519194	1.01499e-19	0
TCGA-HC-A48F-01A	0.0243886	8.87111e-20	3.58373e-19	1.22721e-18	0.0520562	0	2.35466e-18	0	0.0106494	0	0.00134379	0	0	0	0.0108004	0.0487382	0.0129917	0.0207004	0.00449224	0.00486254	0.01581	0	0.0240035	2.57789e-19	0.00995854	0	3.14299e-19	0.099211	0.0896084	0.00045867	0.00171861	0.00287468	6.42781e-19	0.00183137	0.0202891	8.74874e-05	0.00131341	0	0.0322762	0	4.10078e-18	1.48532e-19	0.163225	0.0153307	0.00517358	2.4579e-18	0.011511	2.20821e-20	0
TCGA-HC-A4ZV-01A	0.245822	0.00234972	0.0414611	0.0964769	0.0137573	0.0323566	1.4382e-19	3.04364e-19	0.018223	0.0117122	3.29484e-21	0.0160784	0.0665503	0	0.0340983	0.0607452	0.0290903	0.0114714	0.00103113	0.0133346	0.0237377	0	0.0109837	0.000951492	0.140193	0.0145231	5.94121e-20	0.121465	0.012826	0.00195992	0.00269726	0.00875118	0.0112171	0.00106154	0.0140665	0.000605869	0.0033865	0.0293629	0.0227936	0.0147434	0.00237374	0	0.0464639	0.0176912	1.32302e-19	0.00421815	0.00250038	0	1.48307e-18
TCGA-HC-A631-01A	0.041693	1.62333e-20	0	0	0	0.0103939	6.20475e-19	0	0	0.00627801	0	0	0.048674	5.48715e-19	0.00418875	0.0310588	0.0178693	0.0237962	1.19599e-19	0.000860029	0.000826365	1.17471e-19	0.0363823	1.07139e-19	0.0269886	5.62272e-18	0	0.0517411	0.0174432	0.0063696	0.00077463	0.00351461	0.000166399	0.00307329	0.00975744	0.000584989	0.000510343	4.71197e-18	0.0213535	3.59075e-19	1.99857e-18	7.53595e-18	0.0838236	0.00314579	0.00691049	0	0.00395725	1.59227e-18	4.34205e-19
TCGA-HC-A632-01A	0.244744	0.00146831	0	0.208323	0	0.0330796	0.0185858	0	0.0172618	0.0230183	0	0.0167012	0.100078	0	0.119844	0.0854512	0.0408456	0.00107635	0.000809917	0.0264715	0.0273917	1.88027e-18	0.0168394	0	0.132073	0.0340398	0	0.263324	0.198769	0.00218061	0.00638009	0.00832476	0.00711737	0.00793829	0.00969725	0.00687736	0.0031933	0.0711184	0.0426946	0.00921723	5.75786e-18	7.31023e-18	0.0991873	0.0250961	0.00888874	0.032567	0.00540178	1.62261e-18	0
TCGA-HC-A6AL-01A	0.227869	0.00772495	0.00445287	0.00786026	0.019737	0	1.07588e-18	9.71352e-19	0.0031377	0.0357658	0	4.87326e-21	0.032583	8.10784e-19	0.0830468	0.0261148	0.0122142	0.0123736	8.10016e-21	0.0212303	0.0423244	0.00497036	0.0462409	0	0.0901057	0	1.891e-19	0.10651	0.19784	0.00470997	0.0211911	0.0240381	0.011074	0.0327109	0.00269315	0.00300006	0.00349084	0.00402834	0.0655944	0.0237237	0.00679109	0	0.159461	0.0538293	0.000932761	0	0.0081265	5.22031e-20	0
TCGA-HC-A6AN-01A	0.121605	0.00139795	0	0	1.3762e-18	1.92471e-18	2.94209e-18	1.97242e-18	0	0.0225397	1.86465e-20	2.78812e-18	0.00312556	6.08132e-18	0.0285113	0.0468698	0.0151	0.0128959	0	0.0129832	0.0307958	0.00455238	0.0453534	4.36503e-19	0	1.53109e-18	1.93181e-18	0.180054	0.209069	0.00777007	0.0136796	0.0202925	0.00516076	0.0325512	0.00148809	0.00246881	0.00630134	0	0.0786536	0.00492077	5.6729e-18	0	0.285324	0.0445131	0.00978005	0	0.00782799	1.01562e-19	1.91205e-18
TCGA-HC-A6AO-01A	0.182925	0	0	0.0106201	0.110028	2.3403e-19	4.34497e-18	0	0.0149921	0.0188711	2.28743e-20	1.69385e-18	0.00668554	0	0.0582852	0	0.0125387	0.0160809	0.00501423	0.0125351	0.0267608	1.77544e-18	0.0437819	0	0	0	3.11722e-19	0.0130921	0.103106	0.00634333	0.0131209	0.0162306	0.000973484	0.039196	0.0124248	0	0.00254531	0.00682028	0.0779938	0.010489	0.0686439	0	0.193666	0.0445941	0.00306627	4.78214e-19	0.00236158	0	5.60844e-19
TCGA-HC-A6AP-01A	0.144229	0.00618393	0.0543213	2.88383e-20	4.20214e-19	0	0	0	7.05163e-18	0.0161986	0	0	0	0	0.108455	0.045569	2.12248e-19	0.0225292	0.00650624	0.00906866	0.0669567	8.39753e-19	0.0716553	0	0.0689036	0	5.69877e-19	0.173631	0.150387	0.0190499	0.0456645	0.0253639	0.0158742	0.0159203	0.00176982	0.00189116	0.00468044	0	0.0835849	0.0155797	0.00349187	0	0.194735	0.064106	0.00473308	1.42186e-18	0.00624303	0	4.76994e-18
TCGA-HC-A6AQ-01A	0.0879048	0.00159668	0.008056	0	0.0195978	0	0	0	0.00492278	0.0226572	0.00120572	0	0.0109223	0	0.0260268	0	0.0089917	0.00817858	0.000690983	0.00298424	0.0245942	0.00468449	0.0682111	0	0.0432027	1.1125e-18	5.96836e-18	0.104467	0.0881443	0.0218058	0.0121268	0	4.2485e-19	0.00641467	0.00392986	0.00205021	0.00502459	1.76487e-18	0.0765237	0.0105075	7.13343e-19	0	0.200922	0.0385802	0.00462102	0	0.00752869	0	2.04681e-18
TCGA-HC-A6AS-01A	0.195573	0.00505914	0.097106	0	9.10538e-21	0	4.50778e-18	0	0	0.041733	6.31386e-20	1.54246e-18	0.0176593	5.25228e-18	0.067591	0.0539239	0	0.00491626	0.00713925	0.0114639	0.0436951	0.00575058	0.0598386	0	0.13	0.00513336	0	0.214906	0.180033	0.0176709	0.0346939	0.0254821	0.026072	0.0166086	0.00128496	0.00283078	0.00363312	0	0.0671195	0.0344786	0.0124431	0	0.175048	0.0576887	0.00185102	6.16264e-18	0.00931844	0	0
TCGA-HC-A6HX-01A	0.1113	0.00180739	0.0806078	2.46462e-18	0.0610951	3.99197e-19	3.45478e-18	9.09903e-18	0.00477508	0	9.16804e-19	0	5.8272e-18	0	0.0059252	0.0166907	2.78324e-19	0.000947294	3.44378e-18	0	0.0297443	1.59239e-18	0.100839	1.13842e-18	0.0597635	5.23672e-20	0.00131976	0.190035	0.00094679	0.0444581	0.0331235	0	0.00219268	0.00232381	0	8.65873e-05	0.000495697	0	0.0548697	0.0544969	0	5.3659e-18	0.20791	0.0590636	0.00283118	1.94903e-18	0.0074604	4.76244e-19	2.54964e-18
TCGA-HC-A6HY-01A	0.0403248	7.29304e-21	0	8.04657e-19	0.0363955	3.70649e-19	2.45296e-20	0	0.00747422	0	0.00404648	1.07454e-20	0.0209395	7.87448e-18	0.0238605	0	0.00967825	0.017788	0	0.000958026	0.0071701	0	0.0578274	6.7425e-19	0.0163442	7.81015e-18	0	0.056704	0.0367822	0.012427	0.00393347	0	0	0.00271601	0.00452328	0.00115799	0.00200698	0	0.0643833	0.00916449	9.09109e-19	5.2428e-18	0.194176	0.0198606	0.00248797	0	0.00972998	2.25494e-20	1.28648e-18
TCGA-HC-A76W-01A	0.126048	0.0027409	0.0822735	0	7.29072e-19	0	0	0	0.00586458	0	0.000201717	0	0.00343774	9.51995e-18	0.0267507	0.0657238	0	0.0104683	5.17807e-21	0.00494992	0.0518294	0.00189013	0.0545071	4.07446e-21	0.132674	1.54023e-19	0.00137945	0.218469	0.0255292	0.0112162	0.026813	0.00621922	0.00300765	0.0157936	0.00433861	0.00530325	0	0	0.0285236	0.0484773	3.58165e-19	7.94078e-19	7.97092e-18	0.0398411	4.02895e-19	6.86237e-18	0.00716636	1.20522e-20	0
TCGA-HC-A76X-01A	2.75495e-20	0	0	0	0.0223547	0	0	0	0.0178656	0.0141277	0.00222874	0.000512513	0.0161708	0	0.00454601	0.0198489	0.0119912	0.00555438	0	0.00182957	0.0028683	8.08791e-20	0.0291414	0	0.0109497	0	2.48977e-19	0.0528818	0.0533453	0.00098521	0	0	1.73764e-18	0.00148944	0.0105058	0.00037286	0.00320464	5.94886e-18	0.0589635	0.00404902	6.11905e-18	3.47273e-18	0.091407	0.00848884	0.00415963	0	0.00669942	0	1.74117e-18
TCGA-HC-A8CY-01A	0.268911	2.12605e-19	1.16039e-18	0.065179	0.0645344	0.0175625	8.00468e-19	4.29261e-19	0.031468	0.0368101	1.46001e-21	0.0127255	0.068721	0	0.0299873	1.01954e-18	0.048722	0.00731651	0.00410826	0.0172084	8.40374e-21	0.00506423	0.02183	0	0.0245168	0	0	0.0303205	0.0176152	0.00181393	0.000285575	0.0135533	0.00096816	0.0121223	0.0133616	0	0.0117107	0.00628412	0.0164866	0	4.74359e-19	0	0.142655	0.00344819	0.00435198	0.0012228	0.00543001	0	1.01102e-18
TCGA-HC-A8D0-01A	0.183689	0.0011832	0.0846862	0.00265202	0	0.00802469	2.51784e-20	7.56142e-19	0.00642183	0.0139662	0.00163256	0	0.0318853	2.65092e-18	0.151012	0.0769544	0.00929674	0.0103735	0	0.0168345	0.0370314	7.07269e-19	0.0662511	0	0.0622944	0.00879978	0	0.178702	0.196699	0.0146439	0.0126151	0.000636949	0.000229349	0.00109056	0.00287474	0.00368633	0.00108377	4.13359e-19	0.0705979	0.0218215	0	3.75157e-19	0.0502869	0.0279533	0.000401669	1.73698e-18	0.00533093	0	5.07968e-19
TCGA-HC-A8D1-01A	0.14008	0	0.0716022	1.04629e-18	4.89543e-18	0.0085516	0	0	0.0110224	0.0278693	0	9.79496e-20	0.036188	7.98035e-18	0.0456661	0.0811847	0.00218342	0.00322719	2.79942e-19	0.0118552	0.0203808	0.0103731	0.0628535	0	0.0608718	0.00508314	5.53335e-22	0.17168	0.0843825	0.0185887	0.0128117	0.00213294	0.00049376	0.00520637	0.00174854	0.00362641	0	0	0.0343203	0.0329917	0	2.35541e-19	0	0.0227206	0.000145371	0	0.00845569	0	2.44971e-19
TCGA-HC-A9TE-01A	0.347029	0.00142162	0.0787208	0.0506363	5.76495e-18	0.00380507	0.0197874	2.13804e-20	0.0243596	0.103096	1.0075e-18	0.0188836	0.0552332	3.86752e-18	0.110046	0.0798207	0.0246332	0.00612746	0.000395781	0.0297961	0.0623733	2.40931e-19	0.0467297	0	0.108324	0.0133372	0	0.264757	0.125399	0.00916478	0.0260268	0.00704693	0.00722022	0.00494642	0.00608498	0.00506932	0.00325601	0.00270468	0.0226719	0.0539459	0	6.01567e-19	0.0482024	0.0456952	0	0	0.00912807	0	2.4301e-18
TCGA-HC-A9TH-01A	0.186204	0.00117565	0.102583	0.000235065	0.0310155	0.0107804	5.49162e-18	0	0.0042105	0.0520729	0	0	0.0384964	0	0.0351413	0.0535485	0.0100387	0.0158475	0	0.0139473	0.0227826	0.000602556	0.0360379	0	0.0495953	4.98486e-05	2.02924e-21	0.0395154	0.110329	0.00378175	0.00416105	0.0077731	0.00185303	0.00564436	0.00770627	0	0.00508895	2.94159e-18	0.0236683	0.0202982	0.00414302	0	0.0270055	0.0152967	0.000776661	0	0.00321459	0.000371211	2.47369e-18
TCGA-HI-7168-01A	0.119655	0.00447319	0.139814	0	4.52435e-19	0	7.41481e-18	1.66312e-17	2.50079e-18	0	1.02926e-18	3.54124e-18	0	2.90052e-18	0.0183532	0.090136	4.36749e-19	0.00352263	2.8141e-19	0.000466747	0.0729916	2.04143e-20	0.0273362	0	0.200686	0	0.00141213	0.20985	0.028722	0.00377904	0.0373616	0	0.000412989	0.00124654	0	0.00594702	0.000826946	1.4223e-17	0.0150586	0.0360752	0	5.51737e-19	0.0267988	0.0431663	0.00658848	0	0.0175761	1.30767e-19	0
TCGA-HI-7169-01A	0.0973618	0.00680478	0.133648	0	0	1.98498e-18	0	1.54205e-17	1.10978e-17	0	2.65503e-20	0	2.28142e-18	5.29645e-18	0	0.0890169	2.9586e-18	0.0009686	3.94571e-19	0	0.0380987	0	0.0241382	0	0.300647	0	0	0.313117	0.0196869	0.00873819	0.0244778	0	5.72027e-19	3.73569e-19	0	4.35116e-20	0	4.88164e-18	0.062856	0.0444347	0	0	0.0562443	0.0411891	0.198556	1.69638e-17	0.0163095	1.70246e-18	2.33396e-17
TCGA-HI-7170-01A	0.209699	0.00179409	0.128404	0	7.70091e-18	0	1.62479e-18	0	3.17461e-19	0	0	0	0.0352961	0	0.058454	0.0859399	0	0.000288307	3.4119e-21	0.00862821	0.0750712	0	0.0955645	0	0.227759	0.0124908	0	0.313148	0.0578355	0.0440041	0.0460988	0	0.00498787	0.00204792	0	0.0061482	1.56969e-18	1.8998e-17	0.0410433	0.0608108	1.22452e-18	7.87078e-19	0	0.051463	1.94876e-19	6.67407e-18	0.00651528	6.8922e-20	0
TCGA-HI-7171-01A	0.0591088	0	0	1.38577e-18	0.0120077	0.0078356	1.12603e-17	0	0.00401628	0.00571607	0.00130187	0.00834497	0.044427	0	0.0365009	0.0737842	0.00692976	0.0119829	8.09923e-19	0.0150567	0.0220874	0	0.0291286	0	0.0339927	7.11586e-20	0	0.134091	0.144444	0.00159089	0.00469862	3.76143e-20	0	0.00134076	0.00592576	0.00198661	0.0011682	0	0.0496741	0.00182337	0	1.91989e-19	0.050062	0.0183386	0.00594049	0	0.00816648	0	8.7378e-18
TCGA-J4-8198-01A	0.0574275	0	0.0242902	0	7.7766e-19	0.00434137	0	9.76988e-19	0.0164065	0.00399439	0.000807498	4.70005e-19	0.017318	7.71078e-18	0.0149769	0.0776598	6.72925e-21	0.00582733	0.00259404	0.00483476	0.0204829	0.0060602	0.0305367	0	0.104171	0.0111467	0.00122143	0.204107	0.0559403	0.00363571	0.00447944	3.79051e-20	1.98947e-19	0.00146933	0.009926	0.00309569	0.000693023	0	0.0244804	0.00568924	0	5.00566e-19	0.012143	0.0106926	0.00766941	1.51647e-18	0.0100583	1.66842e-19	5.80245e-18
TCGA-J4-8200-01A	0.0697834	0	0.0265119	2.63678e-19	0	0.0106292	4.89214e-18	0	1.66447e-21	1.01426e-18	0.00356542	7.42779e-19	0.0128429	0	0.0132573	0.0449027	0	0.0176491	9.05251e-19	0.00688087	0.0318085	6.77993e-19	0.0172412	7.52256e-20	0.125478	0	0	0.13948	0.136737	0.0024159	0.0225173	0.0109466	0.00766389	0.00844139	0	0.0034455	1.54598e-18	3.38314e-18	0.027594	0	1.12282e-18	0	0	0.0256311	0.182461	0	0.00416107	2.37263e-19	5.57308e-18
TCGA-J4-A67K-01A	0.194628	0.00256755	0.0128176	0.0205346	0.0404294	0.00769264	0	6.90067e-19	0.0138083	0.049427	0.00382305	0.00938265	0.0460631	0	0.0936041	0.0338255	0.0326097	0.00984709	0	0.0118882	1.27115e-20	3.72608e-19	0.0772226	1.10312e-18	0.0329341	4.78467e-18	1.32139e-19	0.083262	0.0293197	0.0176996	9.41278e-20	0.00363333	0.00152408	0.00736646	0	0	0.00173839	0.00231629	0.077923	0.0228633	0	0	0.179583	0.0167848	6.31785e-05	7.21169e-18	0.00525511	1.63798e-19	3.59246e-19
TCGA-J4-A67L-01A	0.263603	0.00346797	0.0295989	0	0.00503721	0	0	1.92259e-18	0	0.0776602	0.00111522	0.010828	0.052413	0	0.130155	0.038487	0.0176551	0.0110696	1.02846e-19	0.0239726	0.00918956	0.000641466	0.053967	0	0.0751342	3.21139e-18	1.60946e-18	0.129253	0.127297	0.0108721	0.00461376	0.0223429	0.00978235	0.0239897	0.00201325	0.00206501	0.00375911	0	0.0579837	0.00781945	0	0	0.222293	0.027803	0.00173679	0	0.00689765	0	3.84875e-18
TCGA-J4-A67M-01A	0.228662	0.00278801	0.0925151	9.86366e-19	0.033906	0	0	3.19238e-18	0	0.0642567	3.87251e-19	3.27361e-18	0.0174587	4.23867e-18	0.131325	0.0458985	0.00639704	0.00433699	3.67246e-20	0.0132002	0.0564539	0.01084	0.0652911	1.60303e-19	0.109621	0	0.000110508	0.212749	0.190914	0.0200412	0.0344275	0.000312061	0.00736195	0.00385461	2.38229e-19	0.00392883	0.00308703	0	0.0668443	0.0376473	0.0186512	8.91473e-19	0.174219	0.0608049	0.00732193	0	0.0080299	8.77266e-20	0
TCGA-J4-A67N-01A	0.152652	0.00139704	0	1.70118e-18	0.0999051	0	0	3.87685e-19	0.00594367	0.00791389	7.7358e-05	7.14387e-19	0.0198193	0	0.0833316	0.00671282	0.0104298	7.31253e-06	0	0.022355	0.0124887	0.00145272	0.0548679	6.36358e-19	0.0164551	0	3.25043e-19	0.0707443	0.231885	0.0128997	0.0113789	0.0177689	0.00799259	0.0220782	0.00397587	0	0.00380227	0	0.0728317	0.00500891	0	0	0.263583	0.0363079	0.00184097	1.5023e-18	0.00943739	7.32128e-19	0
TCGA-J4-A67O-01A	0.213081	0.0167754	0.0440054	3.61075e-18	0	0	1.68028e-18	1.30894e-17	0	0	0	1.84766e-18	7.28316e-18	1.84096e-17	0.0524389	0.0948258	0	0.00578794	0.00400621	0.0190411	0.0884236	0	0.058766	0	0.126273	0	0.00266751	0.285579	0.277987	0.0149025	0.0666729	4.82952e-19	0	0.0285255	0	0.00544299	0.00594303	0	0.0667996	0.0206555	4.76447e-18	7.11948e-19	0.253656	0.0933661	0.0195715	0	0.00878588	0	2.6701e-17
TCGA-J4-A67Q-01A	0.230359	0.00295762	0.0999461	4.58194e-18	0.000518132	1.45937e-19	0	0	0.00675387	0.0366861	0	0	0.000290745	2.03867e-18	0.0526621	0.0722899	1.55221e-20	0.00575827	0.00994259	0.00564639	0.0467037	0.000346341	0.0608481	1.14587e-19	0.227181	2.39976e-19	0	0.304897	0.0459074	0.0221574	0.0324256	0.00111146	0.00561528	0.00299966	2.94009e-19	0.00385876	0.000557215	0	0.0778128	0.0330227	3.31498e-18	0	0.183228	0.0581239	0.0305077	0	0.0086286	4.55198e-20	6.76514e-18
TCGA-J4-A67R-01A	0.197993	0.00341445	0.0956857	0.0459252	3.96533e-19	3.33708e-19	0	0	0.00837447	0.0355249	0	2.38493e-19	0.00769679	0	0.100758	0.0471889	0.0257777	4.09466e-20	0	0.0104671	0.0530618	0	0.0802009	2.53002e-19	0.082334	0	0	0.179948	0.0626168	0.0256563	0.0348286	4.12437e-19	0	0.00491844	0	0.00389068	0.00277828	0.0352557	0.0591351	0.051678	9.72902e-19	0	0.172393	0.0634369	0.00429029	0	0.00881443	5.93738e-19	5.70019e-18
TCGA-J4-A67S-01A	0.161865	0.00181208	0.00438698	1.01144e-19	0.0485549	0	1.07346e-18	8.57009e-19	0.035084	0.0507246	0	1.9725e-19	0.0245716	7.04493e-19	0.036932	0.0146822	0.0330137	0	1.15879e-18	0.00795934	0.0120718	0	0.0657656	5.15749e-19	0.0322829	5.64721e-18	0	0.0798308	0.0546127	0.0144537	0.012219	0.000430367	2.4464e-19	0.0103595	6.53518e-05	0.0006742	0.00121873	0	0.0768587	0.0114107	0	0	0.172276	0.0398554	0.00152849	4.57017e-18	0.00573928	0	4.87396e-18
[truncated: 214 more rows]
[truncated: 18 more columns]
