# Supplementary material for: Single-cell RNA combined with bulk RNA analysis to explore oxidative stress and energy metabolism factors and found a new prostate cancer oncogene MXRA8
Source: Aging (Albany NY). 2024 Mar 4;16(5):4469–502. doi: 10.18632/aging.205599 (PMC10968713; doi:10.18632/aging.205599)
Supplement: Supplementary Table 6 [file aging-16-205599-s007.xlsx]

## Sheet: cox_res
Supplementary Table 6. Risk model construction and validation results.
gene	coef	p.value	Hazard_Ratio	lower_.95	upper_.95	logrank_pvalue	wald_pvalue	Likelihood_pvalue	HR
FLNA	-0.237859	0.00422337	0.788314	0.669779	0.927828	0.00407638	0.00422337	0.00500159	0.79(0.67-0.93)
MYLK	-0.282591	0.0005912	0.753828	0.641591	0.885699	0.000537054	0.0005912	0.000711825	0.75(0.64-0.89)
MYH11	-0.247962	0.000164152	0.78039	0.68597	0.887805	0.000157155	0.000164152	0.000306858	0.78(0.69-0.89)
ACTA2	-0.243715	0.00526047	0.783711	0.660416	0.930024	0.00523786	0.00526047	0.00627234	0.78(0.66-0.93)
FBLN1	-0.268356	0.00366652	0.764635	0.638023	0.916373	0.00377298	0.00366652	0.00444304	0.76(0.64-0.92)
CSRP1	-0.365418	0.000952834	0.693906	0.558678	0.861866	0.000941995	0.000952834	0.00101492	0.69(0.56-0.86)
MYL9	-0.21678	0.00633005	0.805107	0.689076	0.940677	0.00650174	0.00633005	0.00706764	0.81(0.69-0.94)
ACTG2	-0.228607	0.00049285	0.795641	0.69964	0.904816	0.000511941	0.00049285	0.000797897	0.80(0.70-0.90)
PTGDS	-0.215689	0.00119218	0.805986	0.707417	0.918289	0.00121219	0.00119218	0.00165879	0.81(0.71-0.92)
TGFB1	0.505126	0.0012544	1.6572	1.21927	2.2524	0.0012301	0.0012544	0.00130804	1.66(1.22-2.25)
MXRA8	0.397255	0.00629598	1.48774	1.1188	1.97833	0.00630274	0.00629598	0.00714506	1.49(1.12-1.98)
PPP1R14B	0.402539	0.00801319	1.49562	1.1107	2.01394	0.00813816	0.00801319	0.00841688	1.50(1.11-2.01)
IGFBP3	0.3967	0.000647663	1.48691	1.18382	1.8676	0.000664098	0.000647663	0.000632554	1.49(1.18-1.87)
PTN	-0.254345	0.000386846	0.775424	0.673806	0.892368	0.000388446	0.000386846	0.000412981	0.78(0.67-0.89)
POSTN	0.257534	0.00935425	1.29374	1.06536	1.57107	0.00926157	0.00935425	0.0100693	1.29(1.07-1.57)
BGN	0.352768	0.00156907	1.423	1.14348	1.77085	0.00152252	0.00156907	0.00145708	1.42(1.14-1.77)
COL1A1	0.340373	0.000252156	1.40547	1.17129	1.68648	0.000252791	0.000252156	0.000305463	1.41(1.17-1.69)
EGR1	-0.174985	0.00767388	0.83947	0.738138	0.954712	0.00747356	0.00767388	0.00776252	0.84(0.74-0.95)
THBS2	0.328703	0.000408717	1.38917	1.15769	1.66693	0.000408637	0.000408717	0.000694076	1.39(1.16-1.67)
MT1E	-0.154666	0.00652	0.856701	0.766365	0.957687	0.00632734	0.00652	0.00701181	0.86(0.77-0.96)

## Sheet: Lasso_res
symbol	coef
MYLK	-0.144419
FBLN1	-0.0588611
PTGDS	-0.0474351
TGFB1	0.371976
MXRA8	0.150723
PTN	-0.055776
COL1A1	0.0338853
THBS2	0.0820224
MT1E	-0.0593042

## Sheet: TCGA_Train
sample	riskscore	riskgroup
TCGA-2A-A8VL-01A	-0.245049	Low
TCGA-2A-A8VO-01A	0.00275922	Low
TCGA-2A-A8VT-01A	1.20297	High
TCGA-2A-A8VV-01A	0.0160955	Low
TCGA-2A-A8W1-01A	-0.0944914	Low
TCGA-2A-A8W3-01A	0.834606	High
TCGA-2A-AAYF-01A	-0.213894	Low
TCGA-4L-AA1F-01A	2.15843	High
TCGA-CH-5737-01A	0.620851	High
TCGA-CH-5738-01A	0.413662	Low
TCGA-CH-5739-01A	0.536071	High
TCGA-CH-5741-01A	0.574518	High
TCGA-CH-5743-01A	0.18779	Low
TCGA-CH-5744-01A	0.677915	High
TCGA-CH-5745-01A	0.431522	Low
TCGA-CH-5746-01A	-0.300086	Low
TCGA-CH-5751-01A	1.39398	High
TCGA-CH-5752-01A	1.02749	High
TCGA-CH-5753-01A	0.452137	High
TCGA-CH-5754-01A	0.989114	High
TCGA-CH-5761-01A	0.940405	High
TCGA-CH-5765-01A	-0.133873	Low
TCGA-CH-5766-01A	0.0496714	Low
TCGA-CH-5767-01A	-0.483524	Low
TCGA-CH-5768-01A	0.0496039	Low
TCGA-CH-5771-01A	0.819118	High
TCGA-CH-5772-01A	-0.101002	Low
TCGA-CH-5789-01A	-0.133594	Low
TCGA-CH-5790-01A	0.404762	Low
TCGA-CH-5791-01A	0.730795	High
TCGA-CH-5792-01A	0.688261	High
TCGA-EJ-5497-01A	-0.0561329	Low
TCGA-EJ-5498-01A	-0.0234846	Low
TCGA-EJ-5499-01A	0.329364	Low
TCGA-EJ-5501-01A	0.322095	Low
TCGA-EJ-5504-01A	0.342302	Low
TCGA-EJ-5505-01A	-0.590108	Low
TCGA-EJ-5506-01A	-0.148083	Low
TCGA-EJ-5507-01A	0.381274	Low
TCGA-EJ-5508-01A	-0.046856	Low
TCGA-EJ-5510-01A	0.217601	Low
TCGA-EJ-5511-01A	0.239829	Low
TCGA-EJ-5512-01A	-0.761239	Low
TCGA-EJ-5516-01A	0.274348	Low
TCGA-EJ-5517-01A	-0.661618	Low
TCGA-EJ-5518-01A	0.748187	High
TCGA-EJ-5519-01A	0.698921	High
TCGA-EJ-5521-01A	0.183408	Low
TCGA-EJ-5522-01A	0.0607379	Low
TCGA-EJ-5525-01A	1.40251	High
TCGA-EJ-5527-01A	0.655476	High
TCGA-EJ-5530-01A	0.160588	Low
TCGA-EJ-5532-01A	-0.440152	Low
TCGA-EJ-5542-01A	0.25592	Low
TCGA-EJ-7115-01A	0.416172	Low
TCGA-EJ-7314-01A	0.328834	Low
TCGA-EJ-7315-01A	1.43409	High
TCGA-EJ-7317-01A	-0.209127	Low
TCGA-EJ-7321-01A	0.175336	Low
TCGA-EJ-7327-01A	0.812875	High
TCGA-EJ-7330-01A	0.0835025	Low
TCGA-EJ-7781-01A	-0.16597	Low
TCGA-EJ-7782-01A	0.991848	High
TCGA-EJ-7784-01A	0.479603	High
TCGA-EJ-7786-01A	-0.497913	Low
TCGA-EJ-7788-01A	0.535972	High
TCGA-EJ-7791-01A	0.4126	Low
TCGA-EJ-7793-01A	-0.456233	Low
TCGA-EJ-7794-01A	-0.058339	Low
TCGA-EJ-7797-01A	-0.0994466	Low
TCGA-EJ-8469-01A	0.526139	High
TCGA-EJ-8470-01A	0.434284	High
TCGA-EJ-8474-01A	0.28933	Low
TCGA-EJ-A46D-01A	0.0273703	Low
TCGA-EJ-A46F-01A	0.948983	High
TCGA-EJ-A46H-01A	0.578783	High
TCGA-EJ-A46I-01A	-0.312144	Low
TCGA-EJ-A65B-01A	0.714488	High
TCGA-EJ-A65D-01A	0.957277	High
TCGA-EJ-A65E-01A	-0.0865563	Low
TCGA-EJ-A65F-01A	0.967851	High
TCGA-EJ-A65G-01A	-0.583355	Low
TCGA-EJ-A65J-01A	0.938432	High
TCGA-EJ-A6RA-01A	0.10537	Low
TCGA-EJ-A7NG-01A	0.0313824	Low
TCGA-EJ-A7NJ-01A	-0.136422	Low
TCGA-EJ-A7NK-01A	-0.00797696	Low
TCGA-EJ-A7NM-01A	1.07268	High
TCGA-EJ-A7NN-01A	0.534046	High
TCGA-EJ-A8FO-01A	-0.139134	Low
TCGA-EJ-A8FP-01A	0.126993	Low
TCGA-EJ-A8FU-01A	0.140228	Low
TCGA-EJ-AB27-01A	-0.266364	Low
TCGA-FC-7961-01A	0.679011	High
TCGA-FC-A4JI-01A	0.85724	High
TCGA-FC-A66V-01A	0.257267	Low
TCGA-G9-6339-01A	-0.0645377	Low
TCGA-G9-6343-01A	-0.298952	Low
TCGA-G9-6348-01A	0.614374	High
TCGA-G9-6351-01A	-0.541913	Low
TCGA-G9-6354-01A	-0.382043	Low
TCGA-G9-6356-01A	0.214524	Low
TCGA-G9-6361-01A	0.343728	Low
TCGA-G9-6363-01A	-0.172063	Low
TCGA-G9-6364-01A	0.038758	Low
TCGA-G9-6370-01A	-0.031108	Low
TCGA-G9-6384-01A	0.0868874	Low
TCGA-G9-6385-01A	-0.291671	Low
TCGA-G9-6494-01A	0.00577846	Low
TCGA-G9-6496-01A	0.565336	High
TCGA-G9-6498-01A	-0.129993	Low
TCGA-G9-7509-01A	-0.191778	Low
TCGA-G9-7522-01A	-0.034884	Low
TCGA-G9-7523-01A	0.65007	High
TCGA-G9-A9S0-01A	0.410614	Low
TCGA-H9-7775-01A	0.0499925	Low
TCGA-H9-A6BX-01A	0.102012	Low
TCGA-HC-7075-01A	-0.271724	Low
TCGA-HC-7078-01A	0.313055	Low
TCGA-HC-7079-01A	1.17478	High
TCGA-HC-7081-01A	1.29477	High
TCGA-HC-7211-01A	0.00171626	Low
TCGA-HC-7212-01A	0.652286	High
TCGA-HC-7232-01A	0.533824	High
TCGA-HC-7233-01A	0.543851	High
TCGA-HC-7737-01A	0.539675	High
TCGA-HC-7738-01A	-0.23236	Low
TCGA-HC-7744-01A	0.259776	Low
TCGA-HC-7745-01A	0.654753	High
TCGA-HC-7748-01A	0.567898	High
TCGA-HC-7749-01A	0.692591	High
TCGA-HC-7750-01A	-0.323506	Low
TCGA-HC-7752-01A	0.487278	High
TCGA-HC-7818-01A	-0.102737	Low
TCGA-HC-7819-01A	0.0991237	Low
TCGA-HC-7820-01A	-0.255271	Low
TCGA-HC-8216-01A	0.465527	High
TCGA-HC-8256-01A	-0.264911	Low
TCGA-HC-8257-01A	0.221114	Low
TCGA-HC-8260-01A	-0.0715129	Low
TCGA-HC-8261-01A	0.114863	Low
TCGA-HC-A48F-01A	0.652326	High
TCGA-HC-A4ZV-01A	1.64445	High
TCGA-HC-A6AL-01A	0.574523	High
TCGA-HC-A6AP-01A	0.437951	High
TCGA-HC-A6AS-01A	0.624189	High
TCGA-HC-A6HX-01A	0.488961	High
TCGA-HC-A6HY-01A	-0.101568	Low
TCGA-HC-A8CY-01A	0.838044	High
TCGA-HC-A8D1-01A	0.323682	Low
TCGA-HC-A9TE-01A	0.978506	High
TCGA-HC-A9TH-01A	1.18701	High
TCGA-HI-7168-01A	0.687189	High
TCGA-HI-7170-01A	0.329833	Low
TCGA-HI-7171-01A	0.587402	High
TCGA-J4-8198-01A	0.172707	Low
TCGA-J4-8200-01A	0.0404412	Low
TCGA-J4-A67L-01A	0.589741	High
TCGA-J4-A67M-01A	0.699014	High
TCGA-J4-A67N-01A	0.791201	High
TCGA-J4-A67O-01A	-0.138993	Low
TCGA-J4-A67Q-01A	0.354813	Low
TCGA-J4-A67R-01A	0.326736	Low
TCGA-J4-A67T-01A	0.000485445	Low
TCGA-J4-A6G1-01A	0.744613	High
TCGA-J4-A6G3-01A	0.475045	High
TCGA-J4-A6M7-01A	-0.325127	Low
TCGA-J4-A83J-01A	0.268171	Low
TCGA-J4-A83K-01A	-0.0248955	Low
TCGA-J4-A83L-01A	-0.370927	Low
TCGA-J4-A83M-01A	0.557904	High
TCGA-J4-A83N-01A	0.0931263	Low
TCGA-J4-AATV-01A	0.202706	Low
TCGA-J4-AATZ-01A	0.822994	High
TCGA-J4-AAU2-01A	-0.219878	Low
TCGA-J9-A52D-01A	0.0969597	Low
TCGA-J9-A52E-01A	1.95529	High
TCGA-J9-A8CK-01A	1.15759	High
TCGA-J9-A8CL-01A	1.20782	High
TCGA-J9-A8CM-01A	1.09072	High
TCGA-J9-A8CN-01A	0.0453337	Low
TCGA-KC-A4BL-01A	0.49143	High
TCGA-KC-A4BN-01A	-0.378078	Low
TCGA-KC-A4BR-01A	0.0652342	Low
TCGA-KC-A4BV-01A	1.08733	High
TCGA-KC-A7F3-01A	0.202259	Low
TCGA-KC-A7F5-01A	0.821247	High
TCGA-KC-A7F6-01A	0.384966	Low
TCGA-KC-A7FA-01A	-0.0788343	Low
TCGA-KC-A7FD-01A	0.196769	Low
TCGA-KK-A59V-01A	1.27876	High
TCGA-KK-A59X-01A	0.668716	High
TCGA-KK-A59Z-01A	0.525091	High
TCGA-KK-A6E3-01A	-0.508245	Low
TCGA-KK-A6E7-01A	0.732961	High
TCGA-KK-A6E8-01A	-0.152392	Low
TCGA-KK-A7AP-01A	1.42893	High
TCGA-KK-A7AQ-01A	1.00423	High
TCGA-KK-A7AU-01A	0.727789	High
TCGA-KK-A7AV-01A	0.654417	High
TCGA-KK-A7AW-01A	0.588606	High
TCGA-KK-A7AY-01A	1.06229	High
TCGA-KK-A7AZ-01A	0.749392	High
TCGA-KK-A7B0-01A	0.823728	High
TCGA-KK-A7B1-01A	0.595176	High
TCGA-KK-A7B2-01A	0.963193	High
TCGA-KK-A7B4-01A	1.26094	High
TCGA-KK-A8I6-01A	0.400758	Low
TCGA-KK-A8I7-01A	0.705242	High
TCGA-KK-A8I8-01A	0.541863	High
TCGA-KK-A8IA-01A	0.723998	High
TCGA-KK-A8IC-01A	1.06538	High
TCGA-KK-A8ID-01A	0.974354	High
TCGA-KK-A8IF-01A	0.487764	High
TCGA-KK-A8IG-01A	0.607585	High
TCGA-KK-A8IH-01A	0.672504	High
TCGA-KK-A8II-01A	0.749468	High
TCGA-KK-A8IJ-01A	0.138089	Low
TCGA-KK-A8IK-01A	0.47677	High
TCGA-KK-A8IM-01A	0.648839	High
TCGA-M7-A71Y-01A	0.369284	Low
TCGA-M7-A71Z-01A	1.47303	High
TCGA-M7-A720-01A	-0.158979	Low
TCGA-M7-A721-01A	0.547383	High
TCGA-M7-A723-01A	0.315892	Low
TCGA-M7-A724-01A	0.824588	High
TCGA-M7-A725-01A	0.829968	High
TCGA-MG-AAMC-01A	-0.1059	Low
TCGA-QU-A6IL-01A	0.249141	Low
TCGA-QU-A6IM-01A	0.119623	Low
TCGA-QU-A6IO-01A	0.293135	Low
TCGA-QU-A6IP-01A	-0.0982489	Low
TCGA-SU-A7E7-01A	0.473371	High
TCGA-TP-A8TT-01A	0.457951	High
TCGA-V1-A8MF-01A	0.185773	Low
TCGA-V1-A8MK-01A	-0.331023	Low
TCGA-V1-A8MM-01A	0.753281	High
TCGA-V1-A8MU-01A	0.389521	Low
TCGA-V1-A8WL-01A	-0.131808	Low
TCGA-V1-A8WV-01A	1.08418	High
TCGA-V1-A8WW-01A	1.1403	High
TCGA-V1-A8X3-01A	0.0329634	Low
TCGA-V1-A9O5-01A	1.34286	High
TCGA-V1-A9OA-01A	0.721838	High
TCGA-V1-A9OF-01A	0.00927702	Low
TCGA-V1-A9OH-01A	0.284465	Low
TCGA-V1-A9OL-01A	1.18494	High
TCGA-V1-A9OQ-01A	0.178869	Low
TCGA-V1-A9Z8-01A	0.586119	High
TCGA-V1-A9ZG-01A	1.44152	High
TCGA-V1-A9ZI-01A	1.02789	High
TCGA-V1-A9ZK-01A	0.329877	Low
TCGA-V1-A9ZR-01A	1.01963	High
TCGA-VN-A88I-01A	1.00284	High
TCGA-VN-A88K-01A	1.17062	High
TCGA-VN-A88L-01A	0.211715	Low
TCGA-VN-A88M-01A	0.22174	Low
TCGA-VN-A88O-01A	-0.104899	Low
TCGA-VN-A88P-01A	0.426951	Low
TCGA-VN-A88R-01A	1.06736	High
TCGA-VN-A943-01A	-0.406589	Low
TCGA-VP-A875-01A	0.797015	High
TCGA-VP-A878-01A	0.413371	Low
TCGA-VP-A879-01A	0.0273264	Low
TCGA-VP-A87B-01A	0.695321	High
TCGA-VP-A87C-01A	1.23455	High
TCGA-VP-A87E-01A	0.284595	Low
TCGA-VP-A87H-01A	0.67245	High
TCGA-VP-A87J-01A	0.606041	High
TCGA-VP-A87K-01A	0.618744	High
TCGA-VP-AA1N-01A	0.850034	High
TCGA-X4-A8KQ-01A	0.540396	High
TCGA-XJ-A83F-01A	0.277899	Low
TCGA-XJ-A83G-01A	0.252917	Low
TCGA-XJ-A83H-01A	0.166787	Low
TCGA-XJ-A9DI-01A	1.23488	High
TCGA-XJ-A9DK-01A	0.278216	Low
TCGA-XJ-A9DX-01A	1.17825	High
TCGA-XK-AAIR-01A	0.273888	Low
TCGA-XK-AAJA-01A	0.706147	High
TCGA-XK-AAJP-01A	1.00756	High
TCGA-XK-AAJR-01A	0.498127	High
TCGA-XK-AAJT-01A	0.0311711	Low
TCGA-XK-AAJU-01A	-0.0568996	Low
TCGA-XQ-A8TB-01A	1.03354	High
TCGA-Y6-A8TL-01A	-0.177005	Low
TCGA-Y6-A9XI-01A	0.529067	High
TCGA-YJ-A8SW-01A	0.386438	Low
TCGA-YL-A8HK-01A	0.884485	High
TCGA-YL-A8HL-01A	0.841465	High
TCGA-YL-A8HM-01A	0.694309	High
TCGA-YL-A8S8-01A	0.96378	High
TCGA-YL-A8S9-01A	0.547792	High
TCGA-YL-A8SA-01A	0.63704	High
TCGA-YL-A8SB-01A	0.0876164	Low
TCGA-YL-A8SI-01A	-0.0601183	Low
TCGA-YL-A9WH-01A	1.22071	High
TCGA-YL-A9WI-01A	0.439931	High
TCGA-YL-A9WJ-01A	0.678499	High
TCGA-YL-A9WK-01A	0.659777	High
TCGA-YL-A9WY-01A	1.17334	High
TCGA-ZG-A8QW-01A	0.421622	Low
TCGA-ZG-A8QX-01A	-0.221358	Low
TCGA-ZG-A8QY-01A	0.594032	High
TCGA-ZG-A9KY-01A	1.04236	High
TCGA-ZG-A9L0-01A	1.27443	High
TCGA-ZG-A9L2-01A	1.12244	High
TCGA-ZG-A9L5-01A	1.11864	High
TCGA-ZG-A9L6-01A	0.136614	Low
TCGA-ZG-A9L9-01A	1.04773	High
TCGA-ZG-A9LB-01A	0.485739	High
TCGA-ZG-A9LN-01A	0.638195	High
TCGA-ZG-A9LS-01A	1.11393	High
TCGA-ZG-A9LU-01A	0.459688	High
TCGA-ZG-A9LY-01A	0.732596	High
TCGA-ZG-A9LZ-01A	0.850734	High
TCGA-ZG-A9M4-01A	0.513839	High
TCGA-ZG-A9N3-01A	0.340264	Low

## Sheet: TCGA
sample	riskscore	riskgroup
TCGA-2A-A8VL-01A	-0.245049	Low
TCGA-2A-A8VO-01A	0.00275922	Low
TCGA-2A-A8VT-01A	1.20297	High
TCGA-2A-A8VV-01A	0.0160955	Low
TCGA-2A-A8VX-01A	0.320171	Low
TCGA-2A-A8W1-01A	-0.0944914	Low
TCGA-2A-A8W3-01A	0.834606	High
TCGA-2A-AAYF-01A	-0.213894	Low
TCGA-2A-AAYO-01A	0.0111086	Low
TCGA-2A-AAYU-01A	-0.0026324	Low
TCGA-4L-AA1F-01A	2.15843	High
TCGA-CH-5737-01A	0.620851	High
TCGA-CH-5738-01A	0.413662	High
TCGA-CH-5739-01A	0.536071	High
TCGA-CH-5740-01A	0.224299	Low
TCGA-CH-5741-01A	0.574518	High
TCGA-CH-5743-01A	0.18779	Low
TCGA-CH-5744-01A	0.677915	High
TCGA-CH-5745-01A	0.431522	High
TCGA-CH-5746-01A	-0.300086	Low
TCGA-CH-5748-01A	-0.347858	Low
TCGA-CH-5750-01A	0.346683	Low
TCGA-CH-5751-01A	1.39398	High
TCGA-CH-5752-01A	1.02749	High
TCGA-CH-5753-01A	0.452137	High
TCGA-CH-5754-01A	0.989114	High
TCGA-CH-5761-01A	0.940405	High
TCGA-CH-5762-01A	0.0147098	Low
TCGA-CH-5763-01A	-0.0490804	Low
TCGA-CH-5764-01A	0.162898	Low
TCGA-CH-5765-01A	-0.133873	Low
TCGA-CH-5766-01A	0.0496714	Low
TCGA-CH-5767-01A	-0.483524	Low
TCGA-CH-5768-01A	0.0496039	Low
TCGA-CH-5769-01A	0.439606	High
TCGA-CH-5771-01A	0.819118	High
TCGA-CH-5772-01A	-0.101002	Low
TCGA-CH-5788-01A	0.557256	High
TCGA-CH-5789-01A	-0.133594	Low
TCGA-CH-5790-01A	0.404762	High
TCGA-CH-5791-01A	0.730795	High
TCGA-CH-5792-01A	0.688261	High
TCGA-CH-5794-01A	0.238905	Low
TCGA-EJ-5494-01A	-0.0559098	Low
TCGA-EJ-5495-01A	0.741539	High
TCGA-EJ-5496-01A	-0.38057	Low
TCGA-EJ-5497-01A	-0.0561329	Low
TCGA-EJ-5498-01A	-0.0234846	Low
TCGA-EJ-5499-01A	0.329364	Low
TCGA-EJ-5501-01A	0.322095	Low
TCGA-EJ-5502-01A	0.120543	Low
TCGA-EJ-5503-01A	-0.0496911	Low
TCGA-EJ-5504-01A	0.342302	Low
TCGA-EJ-5505-01A	-0.590108	Low
TCGA-EJ-5506-01A	-0.148083	Low
TCGA-EJ-5507-01A	0.381274	Low
TCGA-EJ-5508-01A	-0.046856	Low
TCGA-EJ-5509-01A	0.356644	Low
TCGA-EJ-5510-01A	0.217601	Low
TCGA-EJ-5511-01A	0.239829	Low
TCGA-EJ-5512-01A	-0.761239	Low
TCGA-EJ-5514-01A	1.00004	High
TCGA-EJ-5515-01A	-0.652407	Low
TCGA-EJ-5516-01A	0.274348	Low
TCGA-EJ-5517-01A	-0.661618	Low
TCGA-EJ-5518-01A	0.748187	High
TCGA-EJ-5519-01A	0.698921	High
TCGA-EJ-5521-01A	0.183408	Low
TCGA-EJ-5522-01A	0.0607379	Low
TCGA-EJ-5524-01A	0.529406	High
TCGA-EJ-5525-01A	1.40251	High
TCGA-EJ-5526-01A	0.484351	High
TCGA-EJ-5527-01A	0.655476	High
TCGA-EJ-5530-01A	0.160588	Low
TCGA-EJ-5531-01A	0.0959739	Low
TCGA-EJ-5532-01A	-0.440152	Low
TCGA-EJ-5542-01A	0.25592	Low
TCGA-EJ-7115-01A	0.416172	High
TCGA-EJ-7123-01A	0.0447645	Low
TCGA-EJ-7125-01A	0.198358	Low
TCGA-EJ-7314-01A	0.328834	Low
TCGA-EJ-7315-01A	1.43409	High
TCGA-EJ-7317-01A	-0.209127	Low
TCGA-EJ-7321-01A	0.175336	Low
TCGA-EJ-7327-01A	0.812875	High
TCGA-EJ-7328-01A	0.522056	High
TCGA-EJ-7330-01A	0.0835025	Low
TCGA-EJ-7331-01A	0.0225695	Low
TCGA-EJ-7781-01A	-0.16597	Low
TCGA-EJ-7782-01A	0.991848	High
TCGA-EJ-7783-01A	0.0930154	Low
TCGA-EJ-7784-01A	0.479603	High
TCGA-EJ-7785-01A	0.158764	Low
TCGA-EJ-7786-01A	-0.497913	Low
TCGA-EJ-7788-01A	0.535972	High
TCGA-EJ-7789-01A	0.966301	High
TCGA-EJ-7791-01A	0.4126	High
TCGA-EJ-7792-01A	0.199127	Low
TCGA-EJ-7793-01A	-0.456233	Low
TCGA-EJ-7794-01A	-0.058339	Low
TCGA-EJ-7797-01A	-0.0994466	Low
TCGA-EJ-8468-01A	0.148758	Low
TCGA-EJ-8469-01A	0.526139	High
TCGA-EJ-8470-01A	0.434284	High
TCGA-EJ-8472-01A	0.47694	High
TCGA-EJ-8474-01A	0.28933	Low
TCGA-EJ-A46B-01A	-0.434954	Low
TCGA-EJ-A46D-01A	0.0273703	Low
TCGA-EJ-A46E-01A	0.252672	Low
TCGA-EJ-A46F-01A	0.948983	High
TCGA-EJ-A46G-01A	0.818385	High
TCGA-EJ-A46H-01A	0.578783	High
TCGA-EJ-A46I-01A	-0.312144	Low
TCGA-EJ-A65B-01A	0.714488	High
TCGA-EJ-A65D-01A	0.957277	High
TCGA-EJ-A65E-01A	-0.0865563	Low
TCGA-EJ-A65F-01A	0.967851	High
TCGA-EJ-A65G-01A	-0.583355	Low
TCGA-EJ-A65J-01A	0.938432	High
TCGA-EJ-A65M-01A	0.144224	Low
TCGA-EJ-A6RA-01A	0.10537	Low
TCGA-EJ-A6RC-01A	0.10861	Low
TCGA-EJ-A7NF-01A	-0.120355	Low
TCGA-EJ-A7NG-01A	0.0313824	Low
TCGA-EJ-A7NH-01A	0.0926814	Low
TCGA-EJ-A7NJ-01A	-0.136422	Low
TCGA-EJ-A7NK-01A	-0.00797696	Low
TCGA-EJ-A7NM-01A	1.07268	High
TCGA-EJ-A7NN-01A	0.534046	High
TCGA-EJ-A8FN-01A	-0.0159394	Low
TCGA-EJ-A8FO-01A	-0.139134	Low
TCGA-EJ-A8FP-01A	0.126993	Low
TCGA-EJ-A8FS-01A	-0.279097	Low
TCGA-EJ-A8FU-01A	0.140228	Low
TCGA-EJ-AB20-01A	0.148015	Low
TCGA-EJ-AB27-01A	-0.266364	Low
TCGA-FC-7708-01A	0.590833	High
TCGA-FC-7961-01A	0.679011	High
TCGA-FC-A4JI-01A	0.85724	High
TCGA-FC-A5OB-01A	0.345625	Low
TCGA-FC-A66V-01A	0.257267	Low
TCGA-FC-A6HD-01A	0.324429	Low
TCGA-FC-A8O0-01A	-0.0737171	Low
TCGA-G9-6329-01A	-0.0296066	Low
TCGA-G9-6332-01A	0.150631	Low
TCGA-G9-6333-01A	-0.069403	Low
TCGA-G9-6336-01A	0.0394937	Low
TCGA-G9-6338-01A	0.635017	High
TCGA-G9-6339-01A	-0.0645377	Low
TCGA-G9-6342-01A	0.0513544	Low
TCGA-G9-6343-01A	-0.298952	Low
TCGA-G9-6347-01A	0.122505	Low
TCGA-G9-6348-01A	0.614374	High
TCGA-G9-6351-01A	-0.541913	Low
TCGA-G9-6353-01A	-0.187431	Low
TCGA-G9-6354-01A	-0.382043	Low
TCGA-G9-6356-01A	0.214524	Low
TCGA-G9-6361-01A	0.343728	Low
TCGA-G9-6362-01A	0.291541	Low
TCGA-G9-6363-01A	-0.172063	Low
TCGA-G9-6364-01A	0.038758	Low
TCGA-G9-6365-01A	-0.0582642	Low
TCGA-G9-6366-01A	0.28527	Low
TCGA-G9-6367-01A	-0.644397	Low
TCGA-G9-6369-01A	-0.610559	Low
TCGA-G9-6370-01A	-0.031108	Low
TCGA-G9-6371-01A	-0.60162	Low
TCGA-G9-6373-01A	0.169027	Low
TCGA-G9-6377-01A	0.428038	High
TCGA-G9-6378-01A	-0.499635	Low
TCGA-G9-6379-01A	0.598783	High
TCGA-G9-6384-01A	0.0868874	Low
TCGA-G9-6385-01A	-0.291671	Low
TCGA-G9-6494-01A	0.00577846	Low
TCGA-G9-6496-01A	0.565336	High
TCGA-G9-6498-01A	-0.129993	Low
TCGA-G9-6499-01A	-0.471448	Low
TCGA-G9-7509-01A	-0.191778	Low
TCGA-G9-7510-01A	0.484064	High
TCGA-G9-7519-01A	-0.590922	Low
TCGA-G9-7521-01A	0.842955	High
TCGA-G9-7522-01A	-0.034884	Low
TCGA-G9-7523-01A	0.65007	High
TCGA-G9-7525-01A	0.620687	High
TCGA-G9-A9S0-01A	0.410614	High
TCGA-G9-A9S7-01A	0.350691	Low
TCGA-H9-7775-01A	0.0499925	Low
TCGA-H9-A6BX-01A	0.102012	Low
TCGA-H9-A6BY-01A	0.00232429	Low
TCGA-HC-7075-01A	-0.271724	Low
TCGA-HC-7077-01A	0.0908409	Low
TCGA-HC-7078-01A	0.313055	Low
TCGA-HC-7079-01A	1.17478	High
TCGA-HC-7080-01A	0.900592	High
TCGA-HC-7081-01A	1.29477	High
TCGA-HC-7209-01A	0.412899	High
TCGA-HC-7210-01A	0.94126	High
TCGA-HC-7211-01A	0.00171626	Low
TCGA-HC-7212-01A	0.652286	High
TCGA-HC-7213-01A	1.00166	High
TCGA-HC-7230-01A	-0.0437853	Low
TCGA-HC-7231-01A	0.520376	High
TCGA-HC-7232-01A	0.533824	High
TCGA-HC-7233-01A	0.543851	High
TCGA-HC-7736-01A	0.568389	High
TCGA-HC-7737-01A	0.539675	High
TCGA-HC-7738-01A	-0.23236	Low
TCGA-HC-7740-01A	0.0355054	Low
TCGA-HC-7742-01A	0.19234	Low
TCGA-HC-7744-01A	0.259776	Low
TCGA-HC-7745-01A	0.654753	High
TCGA-HC-7747-01A	0.196689	Low
TCGA-HC-7748-01A	0.567898	High
TCGA-HC-7749-01A	0.692591	High
TCGA-HC-7750-01A	-0.323506	Low
TCGA-HC-7752-01A	0.487278	High
TCGA-HC-7818-01A	-0.102737	Low
TCGA-HC-7819-01A	0.0991237	Low
TCGA-HC-7820-01A	-0.255271	Low
TCGA-HC-7821-01A	1.55991	High
TCGA-HC-8213-01A	-0.327068	Low
TCGA-HC-8216-01A	0.465527	High
TCGA-HC-8256-01A	-0.264911	Low
TCGA-HC-8257-01A	0.221114	Low
TCGA-HC-8258-01A	-0.0757143	Low
TCGA-HC-8259-01A	-0.623347	Low
TCGA-HC-8260-01A	-0.0715129	Low
TCGA-HC-8261-01A	0.114863	Low
TCGA-HC-8262-01A	0.126172	Low
TCGA-HC-8265-01A	0.453012	High
TCGA-HC-8266-01A	0.400146	Low
TCGA-HC-A48F-01A	0.652326	High
TCGA-HC-A4ZV-01A	1.64445	High
TCGA-HC-A631-01A	1.35164	High
TCGA-HC-A632-01A	1.03427	High
TCGA-HC-A6AL-01A	0.574523	High
TCGA-HC-A6AN-01A	0.931893	High
TCGA-HC-A6AO-01A	0.700715	High
TCGA-HC-A6AP-01A	0.437951	High
TCGA-HC-A6AQ-01A	-0.0132832	Low
TCGA-HC-A6AS-01A	0.624189	High
TCGA-HC-A6HX-01A	0.488961	High
TCGA-HC-A6HY-01A	-0.101568	Low
TCGA-HC-A76W-01A	0.976219	High
TCGA-HC-A76X-01A	-0.0794892	Low
TCGA-HC-A8CY-01A	0.838044	High
TCGA-HC-A8D0-01A	0.411787	High
TCGA-HC-A8D1-01A	0.323682	Low
TCGA-HC-A9TE-01A	0.978506	High
TCGA-HC-A9TH-01A	1.18701	High
TCGA-HI-7168-01A	0.687189	High
TCGA-HI-7169-01A	-0.3468	Low
TCGA-HI-7170-01A	0.329833	Low
TCGA-HI-7171-01A	0.587402	High
TCGA-J4-8198-01A	0.172707	Low
TCGA-J4-8200-01A	0.0404412	Low
TCGA-J4-A67K-01A	0.620819	High
TCGA-J4-A67L-01A	0.589741	High
TCGA-J4-A67M-01A	0.699014	High
TCGA-J4-A67N-01A	0.791201	High
TCGA-J4-A67O-01A	-0.138993	Low
TCGA-J4-A67Q-01A	0.354813	Low
TCGA-J4-A67R-01A	0.326736	Low
TCGA-J4-A67S-01A	0.32466	Low
TCGA-J4-A67T-01A	0.000485445	Low
TCGA-J4-A6G1-01A	0.744613	High
TCGA-J4-A6G3-01A	0.475045	High
TCGA-J4-A6M7-01A	-0.325127	Low
TCGA-J4-A83I-01A	1.06573	High
TCGA-J4-A83J-01A	0.268171	Low
TCGA-J4-A83K-01A	-0.0248955	Low
TCGA-J4-A83L-01A	-0.370927	Low
TCGA-J4-A83M-01A	0.557904	High
TCGA-J4-A83N-01A	0.0931263	Low
TCGA-J4-AATV-01A	0.202706	Low
TCGA-J4-AATZ-01A	0.822994	High
TCGA-J4-AAU2-01A	-0.219878	Low
TCGA-J9-A52B-01A	1.16636	High
TCGA-J9-A52C-01A	0.984218	High
TCGA-J9-A52D-01A	0.0969597	Low
TCGA-J9-A52E-01A	1.95529	High
TCGA-J9-A8CK-01A	1.15759	High
TCGA-J9-A8CL-01A	1.20782	High
TCGA-J9-A8CM-01A	1.09072	High
TCGA-J9-A8CN-01A	0.0453337	Low
TCGA-J9-A8CP-01A	0.754571	High
TCGA-KC-A4BL-01A	0.49143	High
TCGA-KC-A4BN-01A	-0.378078	Low
TCGA-KC-A4BR-01A	0.0652342	Low
TCGA-KC-A4BV-01A	1.08733	High
TCGA-KC-A7F3-01A	0.202259	Low
TCGA-KC-A7F5-01A	0.821247	High
TCGA-KC-A7F6-01A	0.384966	Low
TCGA-KC-A7FA-01A	-0.0788343	Low
TCGA-KC-A7FD-01A	0.196769	Low
TCGA-KC-A7FE-01A	-0.0101834	Low
TCGA-KK-A59V-01A	1.27876	High
TCGA-KK-A59X-01A	0.668716	High
TCGA-KK-A59Y-01A	0.159259	Low
TCGA-KK-A59Z-01A	0.525091	High
TCGA-KK-A5A1-01A	0.406254	High
TCGA-KK-A6DY-01A	0.358491	Low
TCGA-KK-A6E0-01A	-0.126143	Low
TCGA-KK-A6E1-01A	0.854634	High
TCGA-KK-A6E2-01A	0.44281	High
TCGA-KK-A6E3-01A	-0.508245	Low
TCGA-KK-A6E4-01A	0.145965	Low
TCGA-KK-A6E5-01A	0.232013	Low
TCGA-KK-A6E6-01A	0.629347	High
TCGA-KK-A6E7-01A	0.732961	High
TCGA-KK-A6E8-01A	-0.152392	Low
TCGA-KK-A7AP-01A	1.42893	High
TCGA-KK-A7AQ-01A	1.00423	High
TCGA-KK-A7AU-01A	0.727789	High
TCGA-KK-A7AV-01A	0.654417	High
TCGA-KK-A7AW-01A	0.588606	High
TCGA-KK-A7AY-01A	1.06229	High
TCGA-KK-A7AZ-01A	0.749392	High
TCGA-KK-A7B0-01A	0.823728	High
TCGA-KK-A7B1-01A	0.595176	High
TCGA-KK-A7B2-01A	0.963193	High
TCGA-KK-A7B3-01A	0.9586	High
TCGA-KK-A7B4-01A	1.26094	High
TCGA-KK-A8I4-01A	1.07648	High
TCGA-KK-A8I5-01A	0.195606	Low
TCGA-KK-A8I6-01A	0.400758	High
TCGA-KK-A8I7-01A	0.705242	High
TCGA-KK-A8I8-01A	0.541863	High
TCGA-KK-A8I9-01A	1.00067	High
TCGA-KK-A8IA-01A	0.723998	High
TCGA-KK-A8IB-01A	0.644601	High
TCGA-KK-A8IC-01A	1.06538	High
TCGA-KK-A8ID-01A	0.974354	High
TCGA-KK-A8IF-01A	0.487764	High
TCGA-KK-A8IG-01A	0.607585	High
TCGA-KK-A8IH-01A	0.672504	High
TCGA-KK-A8II-01A	0.749468	High
TCGA-KK-A8IJ-01A	0.138089	Low
TCGA-KK-A8IK-01A	0.47677	High
TCGA-KK-A8IL-01A	0.584369	High
TCGA-KK-A8IM-01A	0.648839	High
TCGA-M7-A71Y-01A	0.369284	Low
TCGA-M7-A71Z-01A	1.47303	High
TCGA-M7-A720-01A	-0.158979	Low
TCGA-M7-A721-01A	0.547383	High
TCGA-M7-A722-01A	1.10548	High
TCGA-M7-A723-01A	0.315892	Low
TCGA-M7-A724-01A	0.824588	High
TCGA-M7-A725-01A	0.829968	High
TCGA-MG-AAMC-01A	-0.1059	Low
TCGA-QU-A6IL-01A	0.249141	Low
TCGA-QU-A6IM-01A	0.119623	Low
TCGA-QU-A6IN-01A	0.476726	High
TCGA-QU-A6IO-01A	0.293135	Low
TCGA-QU-A6IP-01A	-0.0982489	Low
TCGA-SU-A7E7-01A	0.473371	High
TCGA-TK-A8OK-01A	0.657575	High
TCGA-TP-A8TT-01A	0.457951	High
TCGA-TP-A8TV-01A	0.597634	High
TCGA-V1-A8MF-01A	0.185773	Low
TCGA-V1-A8MG-01A	0.494732	High
TCGA-V1-A8MK-01A	-0.331023	Low
TCGA-V1-A8ML-01A	-0.0859036	Low
TCGA-V1-A8MM-01A	0.753281	High
TCGA-V1-A8MU-01A	0.389521	Low
TCGA-V1-A8WL-01A	-0.131808	Low
TCGA-V1-A8WN-01A	-0.110703	Low
TCGA-V1-A8WS-01A	0.260041	Low
TCGA-V1-A8WV-01A	1.08418	High
TCGA-V1-A8WW-01A	1.1403	High
TCGA-V1-A8X3-01A	0.0329634	Low
TCGA-V1-A9O5-01A	1.34286	High
TCGA-V1-A9O7-01A	0.774359	High
TCGA-V1-A9O9-01A	0.733198	High
TCGA-V1-A9OA-01A	0.721838	High
TCGA-V1-A9OF-01A	0.00927702	Low
TCGA-V1-A9OH-01A	0.284465	Low
TCGA-V1-A9OL-01A	1.18494	High
TCGA-V1-A9OQ-01A	0.178869	Low
TCGA-V1-A9OT-01A	0.0218594	Low
TCGA-V1-A9OX-01A	-0.0859659	Low
TCGA-V1-A9OY-01A	0.382116	Low
TCGA-V1-A9Z7-01A	0.825118	High
TCGA-V1-A9Z8-01A	0.586119	High
TCGA-V1-A9Z9-01A	0.609016	High
TCGA-V1-A9ZG-01A	1.44152	High
TCGA-V1-A9ZI-01A	1.02789	High
TCGA-V1-A9ZK-01A	0.329877	Low
TCGA-V1-A9ZR-01A	1.01963	High
TCGA-VN-A88I-01A	1.00284	High
TCGA-VN-A88K-01A	1.17062	High
TCGA-VN-A88L-01A	0.211715	Low
TCGA-VN-A88M-01A	0.22174	Low
TCGA-VN-A88N-01A	0.643518	High
TCGA-VN-A88O-01A	-0.104899	Low
TCGA-VN-A88P-01A	0.426951	High
TCGA-VN-A88Q-01A	0.343582	Low
TCGA-VN-A88R-01A	1.06736	High
TCGA-VN-A943-01A	-0.406589	Low
TCGA-VP-A872-01A	1.31566	High
TCGA-VP-A875-01A	0.797015	High
TCGA-VP-A876-01A	-0.097852	Low
TCGA-VP-A878-01A	0.413371	High
TCGA-VP-A879-01A	0.0273264	Low
TCGA-VP-A87B-01A	0.695321	High
TCGA-VP-A87C-01A	1.23455	High
TCGA-VP-A87D-01A	0.546299	High
TCGA-VP-A87E-01A	0.284595	Low
TCGA-VP-A87H-01A	0.67245	High
TCGA-VP-A87J-01A	0.606041	High
TCGA-VP-A87K-01A	0.618744	High
TCGA-VP-AA1N-01A	0.850034	High
TCGA-WW-A8ZI-01A	0.0161901	Low
TCGA-X4-A8KQ-01A	0.540396	High
TCGA-X4-A8KS-01A	-0.419761	Low
TCGA-XA-A8JR-01A	-0.117721	Low
TCGA-XJ-A83F-01A	0.277899	Low
TCGA-XJ-A83G-01A	0.252917	Low
TCGA-XJ-A83H-01A	0.166787	Low
TCGA-XJ-A9DI-01A	1.23488	High
TCGA-XJ-A9DK-01A	0.278216	Low
TCGA-XJ-A9DQ-01A	-0.0986045	Low
TCGA-XJ-A9DX-01A	1.17825	High
TCGA-XK-AAIR-01A	0.273888	Low
TCGA-XK-AAIV-01A	0.902135	High
TCGA-XK-AAIW-01A	1.15352	High
TCGA-XK-AAJA-01A	0.706147	High
TCGA-XK-AAJP-01A	1.00756	High
TCGA-XK-AAJR-01A	0.498127	High
TCGA-XK-AAJT-01A	0.0311711	Low
TCGA-XK-AAJU-01A	-0.0568996	Low
TCGA-XQ-A8TA-01A	1.17735	High
TCGA-XQ-A8TB-01A	1.03354	High
TCGA-Y6-A8TL-01A	-0.177005	Low
TCGA-Y6-A9XI-01A	0.529067	High
TCGA-YJ-A8SW-01A	0.386438	Low
TCGA-YL-A8HJ-01A	0.899637	High
TCGA-YL-A8HK-01A	0.884485	High
TCGA-YL-A8HL-01A	0.841465	High
TCGA-YL-A8HM-01A	0.694309	High
TCGA-YL-A8HO-01A	0.171383	Low
TCGA-YL-A8S8-01A	0.96378	High
TCGA-YL-A8S9-01A	0.547792	High
TCGA-YL-A8SA-01A	0.63704	High
TCGA-YL-A8SB-01A	0.0876164	Low
TCGA-YL-A8SC-01A	0.987323	High
TCGA-YL-A8SI-01A	-0.0601183	Low
TCGA-YL-A9WH-01A	1.22071	High
TCGA-YL-A9WI-01A	0.439931	High
TCGA-YL-A9WJ-01A	0.678499	High
TCGA-YL-A9WK-01A	0.659777	High
TCGA-YL-A9WL-01A	1.31638	High
TCGA-YL-A9WX-01A	0.44928	High
TCGA-YL-A9WY-01A	1.17334	High
TCGA-ZG-A8QW-01A	0.421622	High
TCGA-ZG-A8QX-01A	-0.221358	Low
TCGA-ZG-A8QY-01A	0.594032	High
TCGA-ZG-A8QZ-01A	0.753005	High
TCGA-ZG-A9KY-01A	1.04236	High
TCGA-ZG-A9L0-01A	1.27443	High
TCGA-ZG-A9L1-01A	0.378816	Low
TCGA-ZG-A9L2-01A	1.12244	High
TCGA-ZG-A9L4-01A	1.19709	High
TCGA-ZG-A9L5-01A	1.11864	High
TCGA-ZG-A9L6-01A	0.136614	Low
TCGA-ZG-A9L9-01A	1.04773	High
TCGA-ZG-A9LB-01A	0.485739	High
TCGA-ZG-A9LM-01A	0.820592	High
TCGA-ZG-A9LN-01A	0.638195	High
TCGA-ZG-A9LS-01A	1.11393	High
TCGA-ZG-A9LU-01A	0.459688	High
TCGA-ZG-A9LY-01A	0.732596	High
TCGA-ZG-A9LZ-01A	0.850734	High
TCGA-ZG-A9M4-01A	0.513839	High
TCGA-ZG-A9MC-01A	1.39232	High
TCGA-ZG-A9N3-01A	0.340264	Low
TCGA-ZG-A9ND-01A	0.442142	High
TCGA-ZG-A9NI-01A	0.634675	High

## Sheet: Clinical_stat
sample	Riskscore	Riskgroup	Age	Race	T	N	M	status	time	DFS	DFS.time	MSI	Mutation_Count	T_Stage
TCGA-2A-A8VL-01A	-0.245049	Low	Age<60	WHITE	T2	N0	M0	0	612.486			0.3257	22	T1/2
TCGA-2A-A8VO-01A	0.00275922	Low	Age<60	WHITE	T1		M0	0	1677.68			0.3286	27	T1/2
TCGA-2A-A8VT-01A	1.20297	High	Age<60	ASIAN	T2	N1	M0	0	1354.18			0.3152	39	T1/2
TCGA-2A-A8VV-01A	0.0160955	Low	Age<60		T2	N0	M0	0	661.801			0.3136	25	T1/2
TCGA-2A-A8VX-01A	0.320171	Low	Age>=60	WHITE	T2	N0	M0	0	1359.11			0.3361	30	T1/2
TCGA-2A-A8W1-01A	-0.0944914	Low	Age<60	ASIAN	T1	N0	M0	0	110.465			0.3309	24	T1/2
TCGA-2A-A8W3-01A	0.834606	High	Age>=60	WHITE	T2	N0	M0	1	195.286			0.335	34	T1/2
TCGA-2A-AAYF-01A	-0.213894	Low	Age<60	WHITE	T1		M0	0	1345.3	0	1345.3	0.3205	14	T1/2
TCGA-2A-AAYO-01A	0.0111086	Low	Age<60	WHITE	T1		M0	0	1254.56	0	1254.56	0.3296	20	T1/2
TCGA-2A-AAYU-01A	-0.0026324	Low	Age<60	WHITE	T1	N0	M0	0	606.569			0.3309	21	T1/2
TCGA-4L-AA1F-01A	2.15843	High	Age<60	WHITE	T2	N0	M1	0	345.202	0	345.202	0.3414	25	T1/2
TCGA-CH-5737-01A	0.620851	High	Age>=60	WHITE	T2	N0	M0	0	89.7524			0.2518	46	T1/2
TCGA-CH-5738-01A	0.413662	High	Age>=60	WHITE			M0	0	209.094	0	209.094	0.2594	15
TCGA-CH-5739-01A	0.536071	High	Age>=60	WHITE	T3	N0	M0	0	661.801	0	661.801	0.2588	34	T3/4
TCGA-CH-5740-01A	0.224299	Low	Age<60	WHITE	T2	N0	M0	0	30.575			0.2611	21	T1/2
TCGA-CH-5741-01A	0.574518	High	Age<60	WHITE	T3	N1	M0	0	389.585	0	389.585	0.2602	21	T3/4
TCGA-CH-5743-01A	0.18779	Low	Age>=60	WHITE	T2	N0	M0	1	419.173	0	419.173	0.2748		T1/2
TCGA-CH-5744-01A	0.677915	High	Age<60	WHITE	T2	N0	M0	0	59.1774			0.2721	21	T1/2
TCGA-CH-5745-01A	0.431522	High	Age>=60	WHITE	T3	N0	M0	0	89.7524			0.2674	24	T3/4
TCGA-CH-5746-01A	-0.300086	Low	Age<60	WHITE	T2	N0	M0	0	720.978	0	720.978	0.2718	9	T1/2
TCGA-CH-5748-01A	-0.347858	Low	Age<60	WHITE	T3	N0		0	30.575			0.2656	33	T3/4
TCGA-CH-5750-01A	0.346683	Low	Age>=60	WHITE	T2	N0	M0	0	390.571	0	390.571	0.2643	34	T1/2
TCGA-CH-5751-01A	1.39398	High	Age>=60	WHITE	T4	N1	M0	1	359.996	1	359.996	0.2715	28	T3/4
TCGA-CH-5752-01A	1.02749	High	Age>=60	WHITE	T3	N0	M0	0	930.072	0	930.072	0.2548	39	T3/4
TCGA-CH-5753-01A	0.452137	High	Age>=60	WHITE	T3	N1	M0	0	30.575			0.2613	47	T3/4
TCGA-CH-5754-01A	0.989114	High	Age>=60	WHITE	T3	N1	M0	0	61.15			0.2719	78	T3/4
TCGA-CH-5761-01A	0.940405	High	Age<60	WHITE	T3	N0	M0	0	27.6161			0.2696	48	T3/4
TCGA-CH-5762-01A	0.0147098	Low	Age<60	WHITE	T3	N0	M0	0	1320.64	0	1320.64	0.2841	59	T3/4
TCGA-CH-5763-01A	-0.0490804	Low	Age>=60	WHITE	T3	N0	M0	0	359.996	0	359.996	0.2624	16	T3/4
TCGA-CH-5764-01A	0.162898	Low	Age>=60	WHITE	T3	N0	M0	0	30.575			0.2607	33	T3/4
TCGA-CH-5765-01A	-0.133873	Low	Age<60	WHITE	T3	N0	M0	0	690.403	0	690.403	0.2822	26	T3/4
TCGA-CH-5766-01A	0.0496714	Low	Age<60	WHITE	T3	N1	M0	0	30.575			0.2647	29	T3/4
TCGA-CH-5767-01A	-0.483524	Low	Age>=60	WHITE	T2	N0	M0	0	451.721	0	451.721	0.3007	35	T1/2
TCGA-CH-5768-01A	0.0496039	Low	Age>=60	WHITE	T3	N0	M0	0	720.978	0	720.978	0.2662	39	T3/4
TCGA-CH-5769-01A	0.439606	High	Age<60	WHITE	T3	N0	M0	0	61.15			0.3402	108	T3/4
TCGA-CH-5771-01A	0.819118	High	Age<60	WHITE	T2	N0	M0	0	390.571	0	390.571	0.2627	26	T1/2
TCGA-CH-5772-01A	-0.101002	Low	Age<60	WHITE	T3	N0	M0	0	479.337	0	479.337	0.2662	46	T3/4
TCGA-CH-5788-01A	0.557256	High	Age>=60	WHITE	T3	N1	M0	0	809.745			0.2555	30	T3/4
TCGA-CH-5789-01A	-0.133594	Low	Age<60	WHITE	T3	N0	M0	0	299.832	0	299.832	0.2699	3	T3/4
TCGA-CH-5790-01A	0.404762	High	Age<60	WHITE	T2	N0	M0	0	960.647	0	960.647	0.2693	20	T1/2
TCGA-CH-5791-01A	0.730795	High	Age>=60	WHITE	T3	N0	M0	1	390.571	0	990.236	0.2627	36	T3/4
TCGA-CH-5792-01A	0.688261	High	Age<60	WHITE	T3	N0	M0	0	89.7524			0.2789	33	T3/4
TCGA-CH-5794-01A	0.238905	Low	Age>=60	WHITE	T2	N0	M0	0	869.908	0	869.908	0.2695	24	T1/2
TCGA-EJ-5494-01A	-0.0559098	Low	Age<60	WHITE	T2	N0	M0	0	1456.75	0	1456.75	0.2665	27	T1/2
TCGA-EJ-5495-01A	0.741539	High	Age>=60	WHITE	T1	N1	M0	0	1735.87	0	1735.87	0.2615	68	T1/2
TCGA-EJ-5496-01A	-0.38057	Low	Age<60	WHITE	T1	N0	M0	0	586.843	0	586.843	0.2588	31	T1/2
TCGA-EJ-5497-01A	-0.0561329	Low	Age<60	WHITE	T2	N0	M0	0	399.448	0	399.448	0.26	17	T1/2
TCGA-EJ-5498-01A	-0.0234846	Low	Age<60	WHITE	T2	N0		0	1696.42	0	1696.42	0.2612	28	T1/2
TCGA-EJ-5499-01A	0.329364	Low	Age<60	ASIAN	T2	N0	M0	0	1395.6	0	1395.6	0.2581	30	T1/2
TCGA-EJ-5501-01A	0.322095	Low	Age<60	WHITE	T2	N0	M0	0	1346.29	0	1346.29	0.2751	17	T1/2
TCGA-EJ-5502-01A	0.120543	Low	Age<60		T2	N0	M0	0	1154.95	0	1154.95	0.2697	11	T1/2
TCGA-EJ-5503-01A	-0.0496911	Low	Age<60	WHITE	T2	N0	M0	0	1371.93	0	1371.93	0.2653	7	T1/2
TCGA-EJ-5504-01A	0.342302	Low	Age>=60	WHITE	T2	N1	M0	0	1407.44			0.2626	40	T1/2
TCGA-EJ-5505-01A	-0.590108	Low	Age<60	WHITE	T1	N0	M0	0	909.36	0	909.36	0.2667	27	T1/2
TCGA-EJ-5506-01A	-0.148083	Low	Age>=60	WHITE	T3	N1	M0	0	1362.07	0	1362.07	0.2664	8	T3/4
TCGA-EJ-5507-01A	0.381274	Low	Age<60	WHITE	T2	N1	M0	0	1437.03	0	1437.03	0.2557	29	T1/2
TCGA-EJ-5508-01A	-0.046856	Low	Age>=60	WHITE	T1	N0	M0	0	1938.06	0	1938.06	0.2577	21	T1/2
TCGA-EJ-5509-01A	0.356644	Low	Age<60	WHITE	T2	N0	M0	0	1443.93	0	1443.93	0.2652	19	T1/2
TCGA-EJ-5510-01A	0.217601	Low	Age<60	WHITE	T1	N0	M0	0	1861.13	0	1861.13	0.2695	19	T1/2
TCGA-EJ-5511-01A	0.239829	Low	Age<60	INDIAN_AFRICAN	T2	N0	M0	0	1455.76	0	1455.76	0.2797	36	T1/2
TCGA-EJ-5512-01A	-0.761239	Low	Age<60	WHITE	T1	N0	M0	0	1709.24	0	1709.24	0.262	13	T1/2
TCGA-EJ-5514-01A	1.00004	High	Age>=60	WHITE	T1	N0	M0	0	1803.93	0	1803.93	0.2647	26	T1/2
TCGA-EJ-5515-01A	-0.652407	Low	Age<60	WHITE	T1	N0	M0	0	1806.88	0	1806.88	0.2903	12	T1/2
TCGA-EJ-5516-01A	0.274348	Low	Age<60	WHITE	T2	N0	M0	0	1863.1	0	1863.1	0.258	23	T1/2
TCGA-EJ-5517-01A	-0.661618	Low	Age<60	WHITE	T1	N0	M0	0	1863.1	0	1863.1	0.2528	19	T1/2
TCGA-EJ-5518-01A	0.748187	High	Age>=60	WHITE	T3	N0	M0	1	2075.16			0.2726	31	T3/4
TCGA-EJ-5519-01A	0.698921	High	Age<60	WHITE	T2	N1	M0	0	1935.1	0	1935.1	0.2689	71	T1/2
TCGA-EJ-5521-01A	0.183408	Low	Age<60	WHITE	T1	N0	M0	0	2247.76	0	2247.76	0.2677	40	T1/2
TCGA-EJ-5522-01A	0.0607379	Low	Age<60	WHITE	T2	N0	M0	0	2050.5	0	2050.5	0.2546	14	T1/2
TCGA-EJ-5524-01A	0.529406	High	Age<60	WHITE	T2	N0	M0	1	261.367			0.2541	37	T1/2
TCGA-EJ-5525-01A	1.40251	High	Age>=60	WHITE	T2	N0	M0	1	538.515			0.2706	58	T1/2
TCGA-EJ-5526-01A	0.484351	High	Age<60	WHITE	T1	N1	M0	1	529.638			0.2691	30	T1/2
TCGA-EJ-5527-01A	0.655476	High	Age>=60	WHITE	T2	N0	M0	0	1753.62	0	1753.62	0.2574	29	T1/2
TCGA-EJ-5530-01A	0.160588	Low	Age<60	WHITE	T2	N0	M0	0	1806.88	0	1806.88	0.2709	45	T1/2
TCGA-EJ-5531-01A	0.0959739	Low	Age<60	WHITE	T2	N0	M0	0	1255.55	0	1255.55	0.3296	29	T1/2
TCGA-EJ-5532-01A	-0.440152	Low	Age<60	WHITE	T1	N0	M0	0	1802.94	0	1802.94	0.2755	19	T1/2
TCGA-EJ-5542-01A	0.25592	Low	Age<60	WHITE	T2	N0	M0	0	1492.26	0	1492.26	0.2605	23	T1/2
TCGA-EJ-7115-01A	0.416172	High	Age>=60	WHITE	T1	N0	M0	0	2650.16	0	2650.16	0.3155	40	T1/2
TCGA-EJ-7123-01A	0.0447645	Low	Age<60	WHITE	T1	N0	M0	0	2536.74	0	2536.74	0.2867	55	T1/2
TCGA-EJ-7125-01A	0.198358	Low	Age<60	WHITE	T1	N0	M0	0	2810.93	0	2810.93	0.3004	89	T1/2
TCGA-EJ-7314-01A	0.328834	Low	Age<60	WHITE	T2	N0	M0	0	1134.23	0	1134.23	0.3115	33	T1/2
TCGA-EJ-7315-01A	1.43409	High	Age>=60	WHITE	T2	N0	M0	0	994.181	0	994.181	0.3382	23	T1/2
TCGA-EJ-7317-01A	-0.209127	Low	Age>=60	WHITE	T1	N0	M0	0	760.43	0	760.43	0.314	32	T1/2
TCGA-EJ-7321-01A	0.175336	Low	Age<60	INDIAN_AFRICAN	T1	N0	M0	0	812.703	0	812.703	0.3395	30	T1/2
TCGA-EJ-7327-01A	0.812875	High	Age<60	WHITE	T2	N0	M0	0	910.346	0	910.346	0.2991	27	T1/2
TCGA-EJ-7328-01A	0.522056	High	Age>=60	WHITE	T1	N0	M0	0	830.457	0	830.457	0.3458	24	T1/2
TCGA-EJ-7330-01A	0.0835025	Low	Age>=60	WHITE	T1	N0	M0	0	188.381			0.3671	37	T1/2
TCGA-EJ-7331-01A	0.0225695	Low	Age<60	WHITE	T1	N0	M0	0	731.828	0	731.828	0.348	24	T1/2
TCGA-EJ-7781-01A	-0.16597	Low	Age>=60	WHITE	T1	N0	M0	0	1058.29	0	1058.29	0.3098	54	T1/2
TCGA-EJ-7782-01A	0.991848	High	Age>=60	INDIAN_AFRICAN	T2	N0	M0	0	1151	0	1151	0.4712	357	T1/2
TCGA-EJ-7783-01A	0.0930154	Low	Age>=60	WHITE	T2	N0	M0	0	776.211	0	776.211	0.3263	37	T1/2
TCGA-EJ-7784-01A	0.479603	High	Age<60	WHITE	T2	N0	M0	0	770.293	0	770.293	0.3355	36	T1/2
TCGA-EJ-7785-01A	0.158764	Low	Age<60	WHITE	T2	N0	M0	0	1160.86	0	1160.86	0.3321	18	T1/2
TCGA-EJ-7786-01A	-0.497913	Low	Age<60	WHITE	T1	N0	M0	0	1080.97	0	1080.97	0.3371	30	T1/2
TCGA-EJ-7788-01A	0.535972	High	Age<60	WHITE	T3	N0	M0	0	847.224	0	847.224	0.3475	27	T3/4
TCGA-EJ-7789-01A	0.966301	High	Age>=60	INDIAN_AFRICAN	T1	N0	M0	0	1089.85	0	1089.85	0.3603	30	T1/2
TCGA-EJ-7791-01A	0.4126	High	Age>=60	WHITE	T1	N0	M0	0	1102.67	0	1102.67	0.3074	19	T1/2
TCGA-EJ-7792-01A	0.199127	Low	Age<60	WHITE	T1	N0	M0	0	1376.86	0	1376.86	0.3138	17	T1/2
TCGA-EJ-7793-01A	-0.456233	Low	Age<60	WHITE	T2		M0	0	112.437	0	112.437	0.3176	11	T1/2
TCGA-EJ-7794-01A	-0.058339	Low	Age>=60	WHITE	T2	N0	M0	0	1288.1	0	1288.1	0.3006	13	T1/2
TCGA-EJ-7797-01A	-0.0994466	Low	Age<60	WHITE	T1	N0	M0	0	969.524	0	969.524	0.3237	24	T1/2
TCGA-EJ-8468-01A	0.148758	Low	Age<60	WHITE	T3	N0		0	2314.82	0	2314.82	0.312	21	T3/4
TCGA-EJ-8469-01A	0.526139	High	Age<60	INDIAN_AFRICAN	T3	N0	M0	1	1898.61			0.3399	25	T3/4
TCGA-EJ-8470-01A	0.434284	High	Age<60	INDIAN_AFRICAN	T2	N0	M0	0	1143.11	0	1143.11	0.2922	20	T1/2
TCGA-EJ-8472-01A	0.47694	High	Age<60	WHITE	T3	N0	M0	1	193.313			0.3318	43	T3/4
TCGA-EJ-8474-01A	0.28933	Low	Age>=60	WHITE	T3	N0	M0	0	755.499	0	755.499	0.3154	42	T3/4
TCGA-EJ-A46B-01A	-0.434954	Low	Age>=60	WHITE	T1	N0	M0	0	647.993	0	647.993	0.3247	1	T1/2
TCGA-EJ-A46D-01A	0.0273703	Low	Age<60	WHITE	T2	N0	M0	0	617.418	0	617.418	0.2985	11	T1/2
TCGA-EJ-A46E-01A	0.252672	Low	Age<60	WHITE	T1	N0	M0	0	516.816	0	516.816	0.3085	5	T1/2
TCGA-EJ-A46F-01A	0.948983	High	Age<60	WHITE	T2	N1	M0	1	212.052			0.3086	32	T1/2
TCGA-EJ-A46G-01A	0.818385	High	Age>=60	WHITE	T3	N0	M0	0	658.842	0	658.842	0.2991	48	T3/4
TCGA-EJ-A46H-01A	0.578783	High	Age<60	INDIAN_AFRICAN	T1	N0	M0	0	714.074	0	714.074	0.315	2	T1/2
TCGA-EJ-A46I-01A	-0.312144	Low	Age<60	INDIAN_AFRICAN	T1	N0	M0	0	658.842	0	658.842	0.3214	8	T1/2
TCGA-EJ-A65B-01A	0.714488	High	Age<60	WHITE	T3	N0	M0	0	700.266	0	700.266	0.301	34	T3/4
TCGA-EJ-A65D-01A	0.957277	High	Age>=60	WHITE	T3	N0	M0	0	387.612	0	387.612	0.314	35	T3/4
TCGA-EJ-A65E-01A	-0.0865563	Low	Age>=60	INDIAN_AFRICAN	T3	N0	M0	0	411.283	0	411.283	0.3002	33	T3/4
TCGA-EJ-A65F-01A	0.967851	High	Age<60	WHITE	T3	N0	M0	1	73.9718			0.3247	67	T3/4
TCGA-EJ-A65G-01A	-0.583355	Low	Age<60	WHITE	T2	N0	M0	0	656.87	0	656.87	0.3127	19	T1/2
TCGA-EJ-A65J-01A	0.938432	High	Age<60	WHITE	T3	N0	M0	0	444.817	0	444.817	0.3196	31	T3/4
TCGA-EJ-A65M-01A	0.144224	Low	Age>=60	INDIAN_AFRICAN	T2	N0	M0	0	226.847	0	226.847	0.311	31	T1/2
TCGA-EJ-A6RA-01A	0.10537	Low	Age>=60	WHITE	T3	N1	M0	1	348.161			0.3317	10	T3/4
TCGA-EJ-A6RC-01A	0.10861	Low	Age<60	WHITE	T1	N0	M0	0	861.032	0	861.032	0.331	21	T1/2
TCGA-EJ-A7NF-01A	-0.120355	Low	Age<60	WHITE	T2	N0	M0	0	246.573	0	246.573	0.3275	13	T1/2
TCGA-EJ-A7NG-01A	0.0313824	Low	Age<60	WHITE	T3	N0	M0	0	426.078	0	426.078	0.3218	2	T3/4
TCGA-EJ-A7NH-01A	0.0926814	Low	Age<60	WHITE	T2	N0	M0	0	467.502	0	467.502	0.3335	19	T1/2
TCGA-EJ-A7NJ-01A	-0.136422	Low	Age<60	WHITE	T2	N0	M0	0	194.299	0	194.299	0.3221	8	T1/2
TCGA-EJ-A7NK-01A	-0.00797696	Low	Age<60	WHITE	T3	N0	M0	0	469.474	0	469.474	0.3182	4	T3/4
TCGA-EJ-A7NM-01A	1.07268	High	Age<60	WHITE	T3	N1	M0	0	126.245	0	126.245	0.3229	45	T3/4
TCGA-EJ-A7NN-01A	0.534046	High	Age<60	WHITE	T3	N1	M0	1	194.299	1	194.299	0.3318	32	T3/4
TCGA-EJ-A8FN-01A	-0.0159394	Low	Age<60	WHITE	T2	N0	M0	0	324.49	0	324.49	0.3157	32	T1/2
TCGA-EJ-A8FO-01A	-0.139134	Low	Age<60		T3	N0	M0	0	278.134	0	278.134	0.3206	15	T3/4
TCGA-EJ-A8FP-01A	0.126993	Low	Age<60	WHITE	T2	N0	M0	1	115.396	1	115.396	0.3209	8	T1/2
TCGA-EJ-A8FS-01A	-0.279097	Low	Age>=60	WHITE	T3	N0	M0	1	213.039	1	213.039	0.3282	28	T3/4
TCGA-EJ-A8FU-01A	0.140228	Low	Age<60	WHITE	T3	N0	M0	0	136.108	0	136.108	0.3166	8	T3/4
TCGA-EJ-AB20-01A	0.148015	Low	Age<60		T2	N0	M0	0	129.204	0	129.204	0.3281	13	T1/2
TCGA-EJ-AB27-01A	-0.266364	Low	Age<60	WHITE	T1	N0	M0	0	143.012	0	143.012	0.3237	15	T1/2
TCGA-FC-7708-01A	0.590833	High	Age<60	ASIAN	T1	N0	M0	0	852.155	0	852.155	0.3334	26	T1/2
TCGA-FC-7961-01A	0.679011	High	Age<60	WHITE	T1	N0	M0	0	462.57	0	462.57	0.3182	44	T1/2
TCGA-FC-A4JI-01A	0.85724	High	Age>=60	ASIAN	T3		M0	0	864.977	0	864.977	0.3483	26	T3/4
TCGA-FC-A5OB-01A	0.345625	Low	Age<60	WHITE	T3	N0	M0	0	670.678			0.3086	24	T3/4
TCGA-FC-A66V-01A	0.257267	Low	Age>=60	WHITE	T3	N0	M0	0	516.816	0	516.816	0.3117		T3/4
TCGA-FC-A6HD-01A	0.324429	Low	Age>=60	WHITE	T3	N0	M0	0	778.183	0	778.183	0.3288	25	T3/4
TCGA-FC-A8O0-01A	-0.0737171	Low	Age>=60	WHITE	T2	N0	M0	0	607.555	0	607.555	0.3192	14	T1/2
TCGA-G9-6329-01A	-0.0296066	Low	Age>=60	WHITE	T1		M0	0	1248.64	0	1248.64	0.2856	24	T1/2
TCGA-G9-6332-01A	0.150631	Low	Age<60	WHITE	T2	N0	M0	1	1163.82	1	1163.82	0.344	19	T1/2
TCGA-G9-6333-01A	-0.069403	Low	Age>=60	WHITE	T1	N0	M0	0	2431.21	0	2431.21	0.2902	30	T1/2
TCGA-G9-6336-01A	0.0394937	Low	Age<60	WHITE	T2	N0	M0	0	2039.65	0	2039.65	0.2877	15	T1/2
TCGA-G9-6338-01A	0.635017	High	Age<60	WHITE	T1	N0	M0	0	2000.2	0	2000.2	0.2993	39	T1/2
TCGA-G9-6339-01A	-0.0645377	Low	Age<60	WHITE	T3	N0	M0	1	1611.6	1	1611.6	0.318	38	T3/4
TCGA-G9-6342-01A	0.0513544	Low	Age<60	WHITE	T2		M0	0	1672.75	0	1672.75	0.2949	52	T1/2
TCGA-G9-6343-01A	-0.298952	Low	Age<60	WHITE	T2		M0	0	2416.41	0	2416.41	0.2931	26	T1/2
TCGA-G9-6347-01A	0.122505	Low	Age<60		T1		M0	0	2060.36	0	2060.36	0.3085	14	T1/2
TCGA-G9-6348-01A	0.614374	High	Age>=60	WHITE	T2	N0	M0	0	1494.23	0	1494.23	0.2995	34	T1/2
TCGA-G9-6351-01A	-0.541913	Low	Age<60	WHITE	T1		M0	0	2019.92	0	2019.92	0.2905	75	T1/2
TCGA-G9-6353-01A	-0.187431	Low	Age<60	WHITE	T1		M0	0	1520.86	0	1520.86	0.2785	5	T1/2
TCGA-G9-6354-01A	-0.382043	Low	Age<60	ASIAN	T1		M0	0	2037.68	0	2037.68	0.3244	22	T1/2
TCGA-G9-6356-01A	0.214524	Low	Age<60	WHITE	T1	N0	M0	0	1414.34	0	1414.34	0.2889	23	T1/2
TCGA-G9-6361-01A	0.343728	Low	Age<60	WHITE	T2	N0	M0	0	1395.6	0	1395.6	0.2999	32	T1/2
TCGA-G9-6362-01A	0.291541	Low	Age<60	WHITE	T1	N0	M0	0	1423.22			0.2891	25	T1/2
TCGA-G9-6363-01A	-0.172063	Low	Age<60	WHITE	T2	N0	M0	0	1359.11	0	1359.11	0.2953	44	T1/2
TCGA-G9-6364-01A	0.038758	Low	Age>=60	WHITE	T3	N0	M0	0	1181.58	0	1181.58	0.2914	21	T3/4
TCGA-G9-6365-01A	-0.0582642	Low	Age>=60	WHITE	T2	N0		0	1344.31	0	1344.31	0.2934	24	T1/2
TCGA-G9-6366-01A	0.28527	Low	Age<60	WHITE	T1			0	1920.31	0	1920.31	0.3314	28	T1/2
TCGA-G9-6367-01A	-0.644397	Low	Age<60	WHITE	T2	N0	M0	0	1205.25			0.2971	2	T1/2
TCGA-G9-6369-01A	-0.610559	Low	Age<60	WHITE	T1	N0	M0	0	1198.34	0	1198.34	0.2823	31	T1/2
TCGA-G9-6370-01A	-0.031108	Low	Age<60	WHITE	T1	N0	M0	0	1140.15	0	1140.15	0.2935	1	T1/2
TCGA-G9-6371-01A	-0.60162	Low	Age<60	WHITE	T1		M0	0	1209.19	0	1209.19	0.3089	27	T1/2
TCGA-G9-6373-01A	0.169027	Low	Age>=60	WHITE	T2		M0	0	799.882	0	799.882	0.3311	21	T1/2
TCGA-G9-6377-01A	0.428038	High	Age<60	WHITE	T2	N0	M0	0	944.866	0	944.866	0.2984	47	T1/2
TCGA-G9-6378-01A	-0.499635	Low	Age<60	INDIAN_AFRICAN	T1		M0	0	1139.17	0	1139.17	0.2901	22	T1/2
TCGA-G9-6379-01A	0.598783	High	Age>=60	WHITE	T1	N0	M0	0	1753.62	0	1753.62	0.2984	23	T1/2
TCGA-G9-6384-01A	0.0868874	Low	Age<60	WHITE	T1	N0	M0	0	754.512	0	754.512	0.3033	23	T1/2
TCGA-G9-6385-01A	-0.291671	Low	Age>=60	WHITE	T1		M0	0	818.621	0	818.621	0.2929	9	T1/2
TCGA-G9-6494-01A	0.00577846	Low	Age>=60	WHITE	T1	N0	M0	0	1746.72			0.2844	29	T1/2
TCGA-G9-6496-01A	0.565336	High	Age<60	WHITE	T1	N0	M0	0	1702.34	0	1702.34	0.2946	33	T1/2
TCGA-G9-6498-01A	-0.129993	Low	Age<60	WHITE	T1		M0	1	1323.6	1	1323.6	0.3274	19	T1/2
TCGA-G9-6499-01A	-0.471448	Low	Age>=60	WHITE	T3	N0	M0	0	1521.85	0	1521.85	0.2846	32	T3/4
TCGA-G9-7509-01A	-0.191778	Low	Age<60	INDIAN_AFRICAN	T1		M0	0	1587.93	0	1587.93	0.3225	20	T1/2
TCGA-G9-7510-01A	0.484064	High	Age>=60	WHITE	T1	N0	M0	0	1168.75	0	1168.75	0.3182	34	T1/2
TCGA-G9-7519-01A	-0.590922	Low	Age<60	WHITE	T1		M0	0	837.361	0	837.361	0.3314	33	T1/2
TCGA-G9-7521-01A	0.842955	High	Age<60	WHITE	T3	N1	M0	0	929.086			0.3153	20	T3/4
TCGA-G9-7522-01A	-0.034884	Low	Age<60	WHITE	T1	N0	M0	0	1063.22	0	1063.22	0.3325	8	T1/2
TCGA-G9-7523-01A	0.65007	High	Age<60	INDIAN_AFRICAN	T1	N0	M0	0	845.251	0	845.251	0.3357	12	T1/2
TCGA-G9-7525-01A	0.620687	High	Age<60	WHITE	T1	N0	M0	0	980.373	0	980.373	0.3311	33	T1/2
TCGA-G9-A9S0-01A	0.410614	High	Age<60	WHITE	T2	N1	M0	1	417.201			0.3267	24	T1/2
TCGA-G9-A9S7-01A	0.350691	Low	Age<60	WHITE	T2	N0	M0	0	718.02			0.32	22	T1/2
TCGA-H9-7775-01A	0.0499925	Low	Age>=60	WHITE	T2			0	182.464	0	182.464	0.3632	26	T1/2
TCGA-H9-A6BX-01A	0.102012	Low	Age<60	WHITE	T2			0	928.099	0	928.099	0.3129	5	T1/2
TCGA-H9-A6BY-01A	0.00232429	Low	Age<60	WHITE	T1	N0		0	110.465			0.3027	26	T1/2
TCGA-HC-7075-01A	-0.271724	Low	Age<60	WHITE	T1		M0	0	592.761	0	592.761	0.2898	30	T1/2
TCGA-HC-7077-01A	0.0908409	Low	Age<60	INDIAN_AFRICAN	T1		M0	0	2086	0	2086	0.2945	48	T1/2
TCGA-HC-7078-01A	0.313055	Low	Age>=60	WHITE	T1	N0	M0	0	1957.79	0	1957.79	0.3139	30	T1/2
TCGA-HC-7079-01A	1.17478	High	Age<60	WHITE	T3	N0	M0	1	374.79			0.2961		T3/4
TCGA-HC-7080-01A	0.900592	High	Age>=60	WHITE	T2	N0	M0	1	881.744	0	1090.84	0.2875	32	T1/2
TCGA-HC-7081-01A	1.29477	High	Age<60	WHITE	T3			0	1120.43			0.2953	82	T3/4
TCGA-HC-7209-01A	0.412899	High	Age<60	WHITE	T2	N0		0	433.968	0	433.968	0.3354	15	T1/2
TCGA-HC-7210-01A	0.94126	High	Age>=60	WHITE	T2	N0		0	856.1	0	856.1	0.3196	28	T1/2
TCGA-HC-7211-01A	0.00171626	Low	Age<60	WHITE	T2	N0	M0	0	1204.26	0	1204.26	0.3293	21	T1/2
TCGA-HC-7212-01A	0.652286	High	Age<60	WHITE	T2	N0	M0	0	858.073	0	858.073	0.3495	31	T1/2
TCGA-HC-7213-01A	1.00166	High	Age<60	WHITE	T3	N0	M0	1	167.669			0.3531	35	T3/4
TCGA-HC-7230-01A	-0.0437853	Low	Age<60	WHITE	T2	N0		0	987.277	0	987.277	0.3156	23	T1/2
TCGA-HC-7231-01A	0.520376	High	Age>=60	WHITE	T1		M0	0	926.127	0	926.127	0.3442	33	T1/2
TCGA-HC-7232-01A	0.533824	High	Age>=60	WHITE	T3			1	755.499	1	755.499	0.3381	23	T3/4
TCGA-HC-7233-01A	0.543851	High	Age>=60	WHITE	T2	N0		0	1336.42	0	1336.42	0.3436	29	T1/2
TCGA-HC-7736-01A	0.568389	High	Age<60	WHITE	T2	N0	M0	0	1087.88	0	1087.88	0.3035	19	T1/2
TCGA-HC-7737-01A	0.539675	High	Age<60	INDIAN_AFRICAN	T1	N1	M0	0	1075.06	0	1075.06	0.326	18	T1/2
TCGA-HC-7738-01A	-0.23236	Low	Age<60	WHITE	T2		M0	1	414.242			0.3261	35	T1/2
TCGA-HC-7740-01A	0.0355054	Low	Age<60	WHITE	T2	N0	M0	0	707.17	0	707.17	0.3044	17	T1/2
TCGA-HC-7742-01A	0.19234	Low	Age<60	WHITE	T3	N0	M0	0	925.141			0.3372	30	T3/4
TCGA-HC-7744-01A	0.259776	Low	Age<60	WHITE	T3	N0	M0	0	523.72	0	523.72	0.3455	32	T3/4
TCGA-HC-7745-01A	0.654753	High	Age>=60	WHITE	T3	N0		0	711.115	0	711.115	0.3504	25	T3/4
TCGA-HC-7747-01A	0.196689	Low	Age<60	WHITE	T2	N0	M0	0	737.745	0	737.745	0.3271	31	T1/2
TCGA-HC-7748-01A	0.567898	High	Age<60	WHITE	T2	N0		0	781.142	0	781.142	0.3133	22	T1/2
TCGA-HC-7749-01A	0.692591	High	Age>=60	WHITE	T3	N0	M0	0	714.074	0	714.074	0.3303	49	T3/4
TCGA-HC-7750-01A	-0.323506	Low	Age<60	WHITE	T2		M0	0	514.844	0	514.844	0.3058	17	T1/2
TCGA-HC-7752-01A	0.487278	High	Age<60	WHITE	T2	N0	M0	0	771.279	0	771.279	0.3542	36	T1/2
TCGA-HC-7818-01A	-0.102737	Low	Age>=60	WHITE	T2	N0	M0	0	925.141	0	925.141	0.3309	24	T1/2
TCGA-HC-7819-01A	0.0991237	Low	Age<60	WHITE	T2	N0	M0	0	535.556	0	535.556	0.3362	24	T1/2
TCGA-HC-7820-01A	-0.255271	Low	Age>=60	WHITE	T2			0	736.759	0	736.759	0.3476	30	T1/2
TCGA-HC-7821-01A	1.55991	High	Age<60	WHITE	T3	N1	M0	0	942.894	0	942.894	0.3378	21	T3/4
TCGA-HC-8213-01A	-0.327068	Low	Age<60	WHITE	T2			0	580.925	0	580.925	0.3019	17	T1/2
TCGA-HC-8216-01A	0.465527	High	Age<60	WHITE	T2	N0	M0	0	672.65	0	672.65	0.31	98	T1/2
TCGA-HC-8256-01A	-0.264911	Low	Age<60	INDIAN_AFRICAN	T2		M0	0	848.21	0	848.21	0.3097	21	T1/2
TCGA-HC-8257-01A	0.221114	Low	Age>=60	INDIAN_AFRICAN	T3	N1		0	716.047	0	716.047	0.3115	39	T3/4
TCGA-HC-8258-01A	-0.0757143	Low	Age<60	INDIAN_AFRICAN	T2	N0		0	835.388	0	835.388	0.2544	18	T1/2
TCGA-HC-8259-01A	-0.623347	Low	Age<60	INDIAN_AFRICAN	T1		M0	0	911.332	0	911.332	0.2961	45	T1/2
TCGA-HC-8260-01A	-0.0715129	Low	Age<60	INDIAN_AFRICAN	T2	N0	M0	0	676.595	0	676.595	0.3018	9	T1/2
TCGA-HC-8261-01A	0.114863	Low	Age<60	INDIAN_AFRICAN	T2			0	538.515	0	538.515	0.3571	20	T1/2
TCGA-HC-8262-01A	0.126172	Low	Age<60	WHITE	T2	N0		0	669.691	0	669.691	0.3024	29	T1/2
TCGA-HC-8265-01A	0.453012	High	Age>=60	WHITE	T3	N0		0	476.378	0	476.378	0.3432	52	T3/4
TCGA-HC-8266-01A	0.400146	Low	Age<60	WHITE	T3	N0	M0	0	466.515			0.3504	22	T3/4
TCGA-HC-A48F-01A	0.652326	High	Age<60	WHITE	T1	N1	M0	0	670.678	0	670.678	0.3415	19	T1/2
TCGA-HC-A4ZV-01A	1.64445	High	Age<60	INDIAN_AFRICAN	T2	N0		0	22.6847			0.2828	106	T1/2
TCGA-HC-A631-01A	1.35164	High	Age>=60	WHITE	T2	N0	M0	0	53.2597			0.3115	29	T1/2
TCGA-HC-A632-01A	1.03427	High	Age>=60	WHITE	T1	N0	M0	0	60.1637			0.3221	31	T1/2
TCGA-HC-A6AL-01A	0.574523	High	Age<60	WHITE	T1	N0	M0	0	66.0815			0.305	38	T1/2
TCGA-HC-A6AN-01A	0.931893	High	Age>=60	WHITE	T1	N0	M0	0	48.3282			0.3035	30	T1/2
TCGA-HC-A6AO-01A	0.700715	High	Age<60	WHITE	T1		M0	0	522.734	0	522.734	0.303	25	T1/2
TCGA-HC-A6AP-01A	0.437951	High	Age<60	WHITE	T1		M0	0	70.0266			0.3014	29	T1/2
TCGA-HC-A6AQ-01A	-0.0132832	Low	Age<60	WHITE	T1		M0	0	104.547			0.2968	21	T1/2
TCGA-HC-A6AS-01A	0.624189	High	Age>=60	WHITE	T1	N0	M0	0	43.3968			0.2947	24	T1/2
TCGA-HC-A6HX-01A	0.488961	High	Age<60	WHITE	T1	N0	M0	0	37.479			0.3096	21	T1/2
TCGA-HC-A6HY-01A	-0.101568	Low	Age<60	WHITE	T1		M0	0	132.163			0.3298	23	T1/2
TCGA-HC-A76W-01A	0.976219	High	Age>=60	WHITE	T2	N0	M0	0	210.08			0.3226	30	T1/2
TCGA-HC-A76X-01A	-0.0794892	Low	Age<60	WHITE	T1	N0	M0	0	147.944			0.3337	29	T1/2
TCGA-HC-A8CY-01A	0.838044	High	Age<60	WHITE	T1	N1	M0	0	286.024			0.3203	25	T1/2
TCGA-HC-A8D0-01A	0.411787	High	Age<60	WHITE	T1	N0	M0	0	764.375	0	764.375	0.314	26	T1/2
TCGA-HC-A8D1-01A	0.323682	Low	Age>=60	WHITE	T2	N0	M0	0	565.144	0	565.144	0.3278	21	T1/2
TCGA-HC-A9TE-01A	0.978506	High	Age<60	WHITE	T2	N0	M0	1	213.039			0.3271	45	T1/2
TCGA-HC-A9TH-01A	1.18701	High	Age<60	WHITE	T1	N0	M0	1	346.188			0.3178	47	T1/2
TCGA-HI-7168-01A	0.687189	High	Age<60	WHITE	T1	N0	M0	1	2470.66			0.3111	38	T1/2
TCGA-HI-7169-01A	-0.3468	Low	Age<60	WHITE	T2	N0	M0	0	2647.2	0	2647.2	0.352	27	T1/2
TCGA-HI-7170-01A	0.329833	Low	Age<60	WHITE	T1	N0	M0	0	2487.42	0	2487.42	0.3233	25	T1/2
TCGA-HI-7171-01A	0.587402	High	Age<60	WHITE	T3	N0	M0	1	1310.78			0.3457	28	T3/4
TCGA-J4-8198-01A	0.172707	Low	Age<60	INDIAN_AFRICAN	T1		M0	0	605.582	0	605.582	0.3242	26	T1/2
TCGA-J4-8200-01A	0.0404412	Low	Age<60	ASIAN	T2	N0	M0	0	1201.3	0	1201.3	0.3208	18	T1/2
TCGA-J4-A67K-01A	0.620819	High	Age>=60	WHITE	T2		M0	0	990.236	0	990.236	0.2956	26	T1/2
TCGA-J4-A67L-01A	0.589741	High	Age<60	WHITE	T2	N0	M0	0	759.444	0	759.444	0.3081	24	T1/2
TCGA-J4-A67M-01A	0.699014	High	Age<60	WHITE	T2	N0	M0	0	928.099	0	928.099	0.3138	27	T1/2
TCGA-J4-A67N-01A	0.791201	High	Age<60	WHITE	T2	N0	M0	1	435.94			0.311	22	T1/2
TCGA-J4-A67O-01A	-0.138993	Low	Age<60	WHITE	T2	N0	M0	0	827.498	0	827.498	0.3032	14	T1/2
TCGA-J4-A67Q-01A	0.354813	Low	Age>=60	WHITE	T2		M0	0	961.633	0	961.633	0.3087	18	T1/2
TCGA-J4-A67R-01A	0.326736	Low	Age>=60	WHITE	T1	N0	M0	0	897.524	0	897.524	0.3073	14	T1/2
TCGA-J4-A67S-01A	0.32466	Low	Age<60	WHITE	T2	N0	M0	1	698.294	1	698.294	0.3055	18	T1/2
TCGA-J4-A67T-01A	0.000485445	Low	Age<60	WHITE	T1		M0	0	180.491	0	180.491	0.3287	16	T1/2
TCGA-J4-A6G1-01A	0.744613	High	Age>=60	WHITE	T2	N0	M0	0	758.457	0	758.457	0.3098	12	T1/2
TCGA-J4-A6G3-01A	0.475045	High	Age<60	WHITE	T2	N0	M0	1	609.528			0.3194	24	T1/2
TCGA-J4-A6M7-01A	-0.325127	Low	Age<60	WHITE	T2		M0	0	504.981	0	504.981	0.3215	12	T1/2
TCGA-J4-A83I-01A	1.06573	High	Age<60	WHITE	T1	N0	M0	0	675.609	0	675.609	0.3164	21	T1/2
TCGA-J4-A83J-01A	0.268171	Low	Age>=60	WHITE	T1	N0	M0	0	686.458	0	686.458	0.3343	41	T1/2
TCGA-J4-A83K-01A	-0.0248955	Low	Age<60	WHITE	T1		M0	0	323.503	0	323.503	0.3236	23	T1/2
TCGA-J4-A83L-01A	-0.370927	Low	Age<60	WHITE	T1	N0	M0	0	710.129	0	710.129	0.3289	14	T1/2
TCGA-J4-A83M-01A	0.557904	High	Age<60	WHITE	T2	N0	M0	1	513.857	1	513.857	0.3224	30	T1/2
TCGA-J4-A83N-01A	0.0931263	Low	Age<60	WHITE	T1		M0	1	427.064	0	978.4	0.3325	15	T1/2
TCGA-J4-AATV-01A	0.202706	Low	Age>=60	WHITE	T2	N0	M0	0	545.419			0.3229	3	T1/2
TCGA-J4-AATZ-01A	0.822994	High	Age>=60	ASIAN	T3	N0	M0	1	77.917	1	77.917	0.3366	35	T3/4
TCGA-J4-AAU2-01A	-0.219878	Low	Age<60	WHITE	T2	N0	M0	0	813.69	0	813.69	0.3409	26	T1/2
TCGA-J9-A52B-01A	1.16636	High	Age<60	WHITE	T3	N0		1	56.2186	1	56.2186	0.2999	35	T3/4
TCGA-J9-A52C-01A	0.984218	High	Age<60	WHITE	T1			0	175.56			0.3817	488	T1/2
TCGA-J9-A52D-01A	0.0969597	Low	Age>=60	WHITE	T2		M0	0	209.094			0.3015	35	T1/2
TCGA-J9-A52E-01A	1.95529	High	Age>=60	WHITE	T2	N0		0	318.572			0.3023	21	T1/2
TCGA-J9-A8CK-01A	1.15759	High	Age>=60	WHITE	T3		M0	0	316.599			0.3289	22	T3/4
TCGA-J9-A8CL-01A	1.20782	High	Age>=60	WHITE	T3		M0	1	130.19			0.325	41	T3/4
TCGA-J9-A8CM-01A	1.09072	High	Age>=60	WHITE	T2	N1	M0	1	339.284			0.3135	62	T1/2
TCGA-J9-A8CN-01A	0.0453337	Low	Age<60	WHITE	T1		M0	0	1220.04	0	1220.04	0.3236	19	T1/2
TCGA-J9-A8CP-01A	0.754571	High	Age>=60	WHITE	T2		M0	0	380.708	0	380.708	0.3121	27	T1/2
TCGA-KC-A4BL-01A	0.49143	High	Age>=60	INDIAN_AFRICAN	T1	N0	M0	1	190.354			0.2964	14	T1/2
TCGA-KC-A4BN-01A	-0.378078	Low	Age<60	INDIAN_AFRICAN	T1	N0	M0	0	1790.12	0	1790.12	0.3244	20	T1/2
TCGA-KC-A4BR-01A	0.0652342	Low	Age>=60	WHITE	T2	N1	M0	1	1007.99	1	1007.99	0.3234	8	T1/2
TCGA-KC-A4BV-01A	1.08733	High	Age>=60	ASIAN	T2	N0	M0	1	1309.79	1	1309.79	0.3105	34	T1/2
TCGA-KC-A7F3-01A	0.202259	Low	Age>=60	WHITE	T1	N0	M0	0	655.883	0	655.883	0.3208	23	T1/2
TCGA-KC-A7F5-01A	0.821247	High	Age<60	WHITE	T2	N0	M0	0	89.7524	0	89.7524	0.3311	30	T1/2
TCGA-KC-A7F6-01A	0.384966	Low	Age<60	WHITE	T1	N0	M0	0	259.394	0	259.394	0.3256	22	T1/2
TCGA-KC-A7FA-01A	-0.0788343	Low	Age<60	WHITE	T2	N0	M0	0	589.802	0	589.802	0.3437	36	T1/2
TCGA-KC-A7FD-01A	0.196769	Low	Age<60	WHITE	T1	N0	M0	0	266.298	0	266.298	0.3307	38	T1/2
TCGA-KC-A7FE-01A	-0.0101834	Low	Age<60	WHITE	T1	N0	M0	0	347.174	0	347.174	0.3344	7	T1/2
TCGA-KK-A59V-01A	1.27876	High	Age<60	WHITE	T3	N0	M0	0	3392.84	0	3392.84	0.5438	761	T3/4
TCGA-KK-A59X-01A	0.668716	High	Age<60	INDIAN_AFRICAN	T3	N1	M0	1	2202.39			0.3164	45	T3/4
TCGA-KK-A59Y-01A	0.159259	Low	Age<60	WHITE	T3	N1	M0	0	1941.02	0	1941.02	0.3093	23	T3/4
TCGA-KK-A59Z-01A	0.525091	High	Age>=60	INDIAN_AFRICAN	T2	N0	M0	0	2591.97			0.31	48	T1/2
TCGA-KK-A5A1-01A	0.406254	High	Age>=60	INDIAN_AFRICAN	T3	N0	M0	1	200.217			0.327	92	T3/4
TCGA-KK-A6DY-01A	0.358491	Low	Age<60	INDIAN_AFRICAN	T1	N0	M0	0	4236.12			0.3423	27	T1/2
TCGA-KK-A6E0-01A	-0.126143	Low	Age<60	ASIAN	T2	N0	M0	1	928.099	1	928.099	0.3138	20	T1/2
TCGA-KK-A6E1-01A	0.854634	High	Age<60	WHITE	T2	N1	M0	0	2167.87	0	2167.87	0.342	22	T1/2
TCGA-KK-A6E2-01A	0.44281	High	Age<60	INDIAN_AFRICAN	T2	N0	M0	0	4955.12	0	4955.12	0.3365	35	T1/2
TCGA-KK-A6E3-01A	-0.508245	Low	Age<60	INDIAN_AFRICAN	T1	N0	M0	0	2027.81			0.3074	31	T1/2
TCGA-KK-A6E4-01A	0.145965	Low	Age>=60	INDIAN_AFRICAN	T1	N0	M0	0	3453.99	0	3453.99	0.3064	29	T1/2
TCGA-KK-A6E5-01A	0.232013	Low	Age<60	INDIAN_AFRICAN	T1	N0	M0	0	2044.58	0	2044.58	0.3389	19	T1/2
TCGA-KK-A6E6-01A	0.629347	High	Age>=60	WHITE	T2	N0	M0	0	3399.74			0.3151	33	T1/2
TCGA-KK-A6E7-01A	0.732961	High	Age<60		T1	N1	M0	1	912.319			0.3293	24	T1/2
TCGA-KK-A6E8-01A	-0.152392	Low	Age>=60	WHITE	T1	N0	M0	0	1745.73			0.3175	37	T1/2
TCGA-KK-A7AP-01A	1.42893	High	Age<60	WHITE	T2	N1	M0	0	193.313			0.3362	32	T1/2
TCGA-KK-A7AQ-01A	1.00423	High	Age<60	WHITE	T2	N0	M0	1	1200.32	1	1200.32	0.3307	33	T1/2
TCGA-KK-A7AU-01A	0.727789	High	Age<60	WHITE	T2	N1	M0	1	204.162			0.3338	18	T1/2
TCGA-KK-A7AV-01A	0.654417	High	Age<60	INDIAN_AFRICAN	T1	N0	M0	0	810.731	0	810.731	0.3364	14	T1/2
TCGA-KK-A7AW-01A	0.588606	High	Age<60	INDIAN_AFRICAN	T2	N1	M0	0	1039.55			0.3206	25	T1/2
TCGA-KK-A7AY-01A	1.06229	High	Age<60	WHITE	T2	N0	M0	1	1108.59	1	1108.59	0.3325	42	T1/2
TCGA-KK-A7AZ-01A	0.749392	High	Age<60	WHITE	T2	N0		0	1498.18			0.3182	33	T1/2
TCGA-KK-A7B0-01A	0.823728	High	Age>=60	WHITE	T2	N0	M0	1	597.692			0.3268	27	T1/2
TCGA-KK-A7B1-01A	0.595176	High	Age>=60	WHITE	T1	N0	M0	0	1048.43	0	1048.43	0.3404	18	T1/2
TCGA-KK-A7B2-01A	0.963193	High	Age>=60	WHITE	T1	N1	M0	1	682.513			0.3301	17	T1/2
TCGA-KK-A7B3-01A	0.9586	High	Age<60	WHITE	T3	N0	M0	1	289.969	1	289.969	0.3256	29	T3/4
TCGA-KK-A7B4-01A	1.26094	High	Age<60	WHITE	T3	N1	M0	1	628.267			0.3133	26	T3/4
TCGA-KK-A8I4-01A	1.07648	High	Age<60	WHITE	T2	N1	M0	1	1146.07			0.3235	20	T1/2
TCGA-KK-A8I5-01A	0.195606	Low	Age<60	INDIAN_AFRICAN	T2	N0	M0	0	3053.56	0	3053.56	0.3281	32	T1/2
TCGA-KK-A8I6-01A	0.400758	High	Age<60	WHITE	T2	N0	M0	0	658.842	0	658.842	0.3292	23	T1/2
TCGA-KK-A8I7-01A	0.705242	High	Age<60	WHITE	T2	N0	M0	1	1073.08			0.317	15	T1/2
TCGA-KK-A8I8-01A	0.541863	High	Age>=60	WHITE	T2	N0	M0	0	953.743	0	953.743	0.3249	16	T1/2
TCGA-KK-A8I9-01A	1.00067	High	Age<60		T2	N0	M0	1	927.113	1	927.113	0.3312	37	T1/2
TCGA-KK-A8IA-01A	0.723998	High	Age>=60	WHITE	T3	N1	M0	0	1904.53			0.3211	31	T3/4
TCGA-KK-A8IB-01A	0.644601	High	Age>=60	WHITE	T2	N0	M0	0	81.8621			0.3276	39	T1/2
TCGA-KK-A8IC-01A	1.06538	High	Age<60	WHITE	T1	N0	M0	1	1045.47			0.3236	14	T1/2
TCGA-KK-A8ID-01A	0.974354	High	Age>=60		T2	N1	M0	0	2078.11	0	2078.11	0.324	49	T1/2
TCGA-KK-A8IF-01A	0.487764	High	Age<60	INDIAN_AFRICAN	T2	N0	M0	1	639.116			0.3243	24	T1/2
TCGA-KK-A8IG-01A	0.607585	High	Age<60	WHITE	T2	N0	M0	0	2470.66	0	2470.66	0.3341	30	T1/2
TCGA-KK-A8IH-01A	0.672504	High	Age<60	WHITE	T2	N0	M0	0	1985.4	0	1985.4	0.3267	20	T1/2
TCGA-KK-A8II-01A	0.749468	High	Age<60	WHITE	T2	N0	M0	1	617.418			0.3449	30	T1/2
TCGA-KK-A8IJ-01A	0.138089	Low	Age<60	WHITE	T3	N1	M0	1	302.791			0.322	25	T3/4
TCGA-KK-A8IK-01A	0.47677	High	Age<60	WHITE	T1	N0	M0	0	2023.87	0	2023.87	0.3476	28	T1/2
TCGA-KK-A8IL-01A	0.584369	High	Age>=60	WHITE	T1	N1	M0	0	619.39			0.3313	27	T1/2
TCGA-KK-A8IM-01A	0.648839	High	Age<60	WHITE	T2	N0	M0	0	1888.75	0	1888.75	0.3305	25	T1/2
TCGA-M7-A71Y-01A	0.369284	Low	Age<60	WHITE	T1			0	486.241	0	486.241	0.3205	13	T1/2
TCGA-M7-A71Z-01A	1.47303	High	Age<60	WHITE	T2	N0		0	634.185	0	634.185	0.3313	25	T1/2
TCGA-M7-A720-01A	-0.158979	Low	Age<60	WHITE	T1			0	378.736	0	378.736	0.312	6	T1/2
TCGA-M7-A721-01A	0.547383	High	Age>=60	WHITE	T1		M0	0	394.516	0	394.516	0.3164	29	T1/2
TCGA-M7-A722-01A	1.10548	High	Age>=60	WHITE	T2	N0	M0	1	551.336			0.3239	32	T1/2
TCGA-M7-A723-01A	0.315892	Low	Age<60	WHITE	T1	N1	M0	0	752.54	0	752.54	0.2994	3	T1/2
TCGA-M7-A724-01A	0.824588	High	Age<60	WHITE	T1	N0	M0	0	876.812			0.3212	27	T1/2
TCGA-M7-A725-01A	0.829968	High	Age<60	WHITE	T3	N0	M0	0	565.144	0	565.144	0.3095	27	T3/4
TCGA-MG-AAMC-01A	-0.1059	Low	Age<60	WHITE	T1	N0	M0	0	170.628	0	170.628	0.3368	22	T1/2
TCGA-QU-A6IL-01A	0.249141	Low	Age<60	ASIAN	T2	N0	M0	0	95.6702	0	95.6702	0.3107	20	T1/2
TCGA-QU-A6IM-01A	0.119623	Low	Age<60	WHITE	T2	N0	M0	0	1229.9	0	1229.9	0.3139	62	T1/2
TCGA-QU-A6IN-01A	0.476726	High	Age<60	WHITE	T1	N0	M0	0	4205.54	0	4205.54	0.3265	20	T1/2
TCGA-QU-A6IO-01A	0.293135	Low	Age<60	INDIAN_AFRICAN	T1	N0	M0	0	3665.06	0	3665.06	0.3272	26	T1/2
TCGA-QU-A6IP-01A	-0.0982489	Low	Age>=60	WHITE	T2	N0	M0	0	2584.08	0	2584.08	0.2956	14	T1/2
TCGA-SU-A7E7-01A	0.473371	High	Age<60	WHITE	T2	N0	M0	0	543.446	0	543.446	0.325	21	T1/2
TCGA-TK-A8OK-01A	0.657575	High	Age>=60	WHITE			M0	0	26.6298			0.3346	37
TCGA-TP-A8TT-01A	0.457951	High	Age<60	WHITE	T1	N0	M0	0	518.789			0.3272	24	T1/2
TCGA-TP-A8TV-01A	0.597634	High	Age<60	WHITE	T1	N0	M0	0	601.637	0	601.637	0.34	34	T1/2
TCGA-V1-A8MF-01A	0.185773	Low	Age>=60	INDIAN_AFRICAN	T2	N0	M0	0	1429.14	0	1429.14	0.3376	28	T1/2
TCGA-V1-A8MG-01A	0.494732	High	Age<60	INDIAN_AFRICAN	T2		M0	0	845.251	0	845.251	0.321	23	T1/2
TCGA-V1-A8MK-01A	-0.331023	Low	Age<60	INDIAN_AFRICAN	T2	N0	M0	0	501.036	0	501.036	0.3185	8	T1/2
TCGA-V1-A8ML-01A	-0.0859036	Low	Age<60	INDIAN_AFRICAN	T2	N0	M0	0	441.858	0	441.858	0.3314	10	T1/2
TCGA-V1-A8MM-01A	0.753281	High	Age<60	INDIAN_AFRICAN	T2	N0	M0	1	976.428	1	976.428	0.3341	17	T1/2
TCGA-V1-A8MU-01A	0.389521	Low	Age<60	INDIAN_AFRICAN	T2	N1	M0	0	1850.28			0.3168	22	T1/2
TCGA-V1-A8WL-01A	-0.131808	Low	Age<60	INDIAN_AFRICAN	T1	N0	M0	0	1921.29	0	1921.29	0.3343	25	T1/2
TCGA-V1-A8WN-01A	-0.110703	Low	Age<60	INDIAN_AFRICAN	T2		M0	0	911.332	0	911.332	0.332	12	T1/2
TCGA-V1-A8WS-01A	0.260041	Low	Age<60	WHITE	T1		M0	0	467.502			0.3298	23	T1/2
TCGA-V1-A8WV-01A	1.08418	High	Age<60	WHITE	T2	N1	M0	0	676.595	0	676.595	0.3198	39	T1/2
TCGA-V1-A8WW-01A	1.1403	High	Age<60	WHITE	T2	N1	M0	0	1063.22	0	1063.22	0.3368	32	T1/2
TCGA-V1-A8X3-01A	0.0329634	Low	Age<60	WHITE	T1	N0	M0	0	199.231	0	199.231	0.3208	22	T1/2
TCGA-V1-A9O5-01A	1.34286	High	Age<60	WHITE	T2	N1	M0	1	122.3	1	122.3	0.3292	37	T1/2
TCGA-V1-A9O7-01A	0.774359	High	Age<60	WHITE	T2	N0	M0	1	807.772			0.3298	23	T1/2
TCGA-V1-A9O9-01A	0.733198	High	Age<60	WHITE	T3	N0	M0	0	2830.65	0	2830.65	0.3216	26	T3/4
TCGA-V1-A9OA-01A	0.721838	High	Age<60	WHITE	T2	N1	M0	0	627.281	0	627.281	0.3348	17	T1/2
TCGA-V1-A9OF-01A	0.00927702	Low	Age<60	WHITE	T1		M0	0	1167.77	0	1167.77	0.3231	13	T1/2
TCGA-V1-A9OH-01A	0.284465	Low	Age<60	WHITE	T1		M0	0	2370.06	0	2370.06	0.318	51	T1/2
TCGA-V1-A9OL-01A	1.18494	High	Age>=60	ASIAN	T2	N0	M0	1	103.561	1	103.561	0.3249	28	T1/2
TCGA-V1-A9OQ-01A	0.178869	Low	Age>=60	WHITE	T1		M0	0	365.914	0	365.914	0.3344	45	T1/2
TCGA-V1-A9OT-01A	0.0218594	Low	Age<60	WHITE	T1		M0	1	287.997			0.325	21	T1/2
TCGA-V1-A9OX-01A	-0.0859659	Low	Age<60	WHITE	T2	N0	M0	0	1118.45			0.3313	20	T1/2
TCGA-V1-A9OY-01A	0.382116	Low	Age<60	WHITE	T2	N1	M0	0	1052.37	0	1052.37	0.3267	16	T1/2
TCGA-V1-A9Z7-01A	0.825118	High	Age<60	WHITE	T2	N0	M0	0	862.018	0	862.018	0.3332	25	T1/2
TCGA-V1-A9Z8-01A	0.586119	High	Age<60	WHITE	T3	N0	M0	0	815.662	0	815.662	0.3284	26	T3/4
TCGA-V1-A9Z9-01A	0.609016	High	Age<60	WHITE	T1	N0	M0	0	532.597	0	532.597	0.322	28	T1/2
TCGA-V1-A9ZG-01A	1.44152	High	Age<60	WHITE	T1	N0	M0	0	1496.2	0	1496.2	0.3293	24	T1/2
TCGA-V1-A9ZI-01A	1.02789	High	Age>=60	WHITE	T3	N0	M0	0	1617.52			0.3176	27	T3/4
TCGA-V1-A9ZK-01A	0.329877	Low	Age>=60	WHITE	T2	N0	M0	0	1364.04	0	1364.04	0.3281	22	T1/2
TCGA-V1-A9ZR-01A	1.01963	High	Age>=60	WHITE	T2	N0	M0	0	1342.34	0	1342.34	0.3482	33	T1/2
TCGA-VN-A88I-01A	1.00284	High	Age<60	WHITE	T1	N0	M0	0	265.312			0.3228	12	T1/2
TCGA-VN-A88K-01A	1.17062	High	Age<60	WHITE	T1	N1	M0	0	765.361	0	765.361	0.3381	22	T1/2
TCGA-VN-A88L-01A	0.211715	Low	Age<60	WHITE	T1	N0	M0	0	735.773	0	735.773	0.3338	15	T1/2
TCGA-VN-A88M-01A	0.22174	Low	Age<60	INDIAN_AFRICAN	T1	N0	M0	0	186.409	0	186.409	0.3158	16	T1/2
TCGA-VN-A88N-01A	0.643518	High	Age<60	WHITE	T1	N0	M0	0	755.499	0	755.499	0.3258	22	T1/2
TCGA-VN-A88O-01A	-0.104899	Low	Age<60		T1	N0	M0	0	474.406	0	474.406	0.3181	29	T1/2
TCGA-VN-A88P-01A	0.426951	High	Age<60	WHITE	T1	N0	M0	0	1242.73	0	1242.73	0.3267	34	T1/2
TCGA-VN-A88Q-01A	0.343582	Low	Age<60	WHITE	T2	N0	M0	0	1347.27	0	1347.27	0.3317	30	T1/2
TCGA-VN-A88R-01A	1.06736	High	Age<60	INDIAN_AFRICAN	T1	N0	M0	1	504.981			0.3327	22	T1/2
TCGA-VN-A943-01A	-0.406589	Low	Age>=60	WHITE	T1	N0	M0	0	489.2	0	489.2	0.3218	22	T1/2
TCGA-VP-A872-01A	1.31566	High	Age<60	WHITE	T2	N0	M0	0	3581.22	0	3581.22	0.3341	26	T1/2
TCGA-VP-A875-01A	0.797015	High	Age>=60	INDIAN_AFRICAN	T2	N0	M0	0	2277.34	0	2277.34	0.3324	28	T1/2
TCGA-VP-A876-01A	-0.097852	Low	Age<60	WHITE	T1	N0		0	3287.31	0	3287.31	0.3195	20	T1/2
TCGA-VP-A878-01A	0.413371	High	Age<60	WHITE	T1	N1		1	96.6565			0.3197	27	T1/2
TCGA-VP-A879-01A	0.0273264	Low	Age>=60	WHITE	T1	N0	M0	0	718.02	0	718.02	0.3134	40	T1/2
TCGA-VP-A87B-01A	0.695321	High	Age<60	WHITE	T1	N0	M0	1	2439.1	0	2684.68	0.3227	36	T1/2
TCGA-VP-A87C-01A	1.23455	High	Age>=60	INDIAN_AFRICAN	T1	N0	M0	0	1666.83	0	1666.83	0.3158	20	T1/2
TCGA-VP-A87D-01A	0.546299	High	Age<60	WHITE	T1	N1	M0	1	1177.63	1	1177.63	0.3234	48	T1/2
TCGA-VP-A87E-01A	0.284595	Low	Age<60	INDIAN_AFRICAN	T1	N0	M0	0	2009.07	0	2009.07	0.3287	19	T1/2
TCGA-VP-A87H-01A	0.67245	High	Age>=60	WHITE	T2	N0	M0	0	653.911	0	653.911	0.3177	27	T1/2
TCGA-VP-A87J-01A	0.606041	High	Age<60	INDIAN_AFRICAN	T2	N1	M0	0	1749.68	0	1749.68	0.3196	28	T1/2
TCGA-VP-A87K-01A	0.618744	High	Age<60	WHITE	T1	N0	M0	1	525.693	1	525.693	0.3178	29	T1/2
TCGA-VP-AA1N-01A	0.850034	High	Age>=60	WHITE	T1	N0	M0	0	1346.29	0	1346.29	0.3318	30	T1/2
TCGA-WW-A8ZI-01A	0.0161901	Low	Age>=60	WHITE	T2	N0	M0	0	442.844	0	442.844	0.3274	26	T1/2
TCGA-X4-A8KQ-01A	0.540396	High	Age>=60	WHITE	T1	N0	M0	0	1364.04			0.332	37	T1/2
TCGA-X4-A8KS-01A	-0.419761	Low	Age<60	INDIAN_AFRICAN	T2		M0	0	965.578			0.3343	23	T1/2
TCGA-XA-A8JR-01A	-0.117721	Low	Age>=60		T2	N0	M0	0	370.845	0	370.845	0.3025	20	T1/2
TCGA-XJ-A83F-01A	0.277899	Low	Age>=60	WHITE	T3	N0		0	1111.55	0	1111.55	0.3173	29	T3/4
TCGA-XJ-A83G-01A	0.252917	Low	Age<60	INDIAN_AFRICAN	T1	N0		0	1440.97	0	1440.97	0.3336	19	T1/2
TCGA-XJ-A83H-01A	0.166787	Low	Age<60	WHITE	T2		M0	0	1262.45			0.3136	32	T1/2
TCGA-XJ-A9DI-01A	1.23488	High	Age<60	WHITE	T2	N0	M0	0	1440.97	0	1440.97	0.3393	17	T1/2
TCGA-XJ-A9DK-01A	0.278216	Low	Age<60	WHITE	T1		M0	0	271.23	0	271.23	0.3301	4	T1/2
TCGA-XJ-A9DQ-01A	-0.0986045	Low	Age<60	WHITE	T1		M0	0	89.7524			0.3259	9	T1/2
TCGA-XJ-A9DX-01A	1.17825	High	Age<60	INDIAN_AFRICAN	T1	N1	M1	0	959.661			0.3309	61	T1/2
TCGA-XK-AAIR-01A	0.273888	Low	Age>=60	WHITE	T1	N0	M0	0	958.674	0	958.674	0.3372	25	T1/2
TCGA-XK-AAIV-01A	0.902135	High	Age<60	WHITE	T1	N1	M0	0	1117.47	0	1117.47	0.3378	43	T1/2
TCGA-XK-AAIW-01A	1.15352	High	Age>=60	WHITE	T2	N0	M0	1	421.146	0	1201.3	0.4874	6230	T1/2
TCGA-XK-AAJA-01A	0.706147	High	Age<60		T2	N0	M0	0	917.25	0	917.25	0.3349	40	T1/2
TCGA-XK-AAJP-01A	1.00756	High	Age>=60	WHITE	T1	N0	M0	0	1241.74	0	1241.74	0.3238	30	T1/2
TCGA-XK-AAJR-01A	0.498127	High	Age<60	WHITE	T1	N0	M0	1	129.204	1	129.204	0.3205	24	T1/2
TCGA-XK-AAJT-01A	0.0311711	Low	Age>=60	WHITE	T1	N0	M0	0	1414.34			0.3264	28	T1/2
TCGA-XK-AAJU-01A	-0.0568996	Low	Age>=60	WHITE	T1	N0	M0	0	1554.39	0	1554.39	0.3238	1	T1/2
TCGA-XQ-A8TA-01A	1.17735	High	Age<60	WHITE	T3		M1	1	143.998			0.3286	106	T3/4
TCGA-XQ-A8TB-01A	1.03354	High	Age>=60	WHITE	T2	N0	M0	0	759.444	0	759.444	0.3204	24	T1/2
TCGA-Y6-A8TL-01A	-0.177005	Low	Age>=60		T2	N0		0	978.4			0.3388	26	T1/2
TCGA-Y6-A9XI-01A	0.529067	High	Age>=60			N0		0	518.789	0	518.789	0.3279	40
TCGA-YJ-A8SW-01A	0.386438	Low	Age>=60		T1	N0		0	145.971			0.3258	54	T1/2
TCGA-YL-A8HJ-01A	0.899637	High	Age<60	WHITE	T3		M0	0	1588.91	0	1588.91	0.3259	30	T3/4
TCGA-YL-A8HK-01A	0.884485	High	Age<60	WHITE	T3	N0	M0	1	1357.14	1	1357.14	0.3218	16	T3/4
TCGA-YL-A8HL-01A	0.841465	High	Age<60	WHITE	T3	N1	M0	0	1543.54			0.3202	17	T3/4
TCGA-YL-A8HM-01A	0.694309	High	Age>=60	WHITE	T3	N0	M0	1	1452.81	1	1452.81	0.3376	34	T3/4
TCGA-YL-A8HO-01A	0.171383	Low	Age>=60	INDIAN_AFRICAN	T3	N0	M0	1	1053.36			0.3212	28	T3/4
TCGA-YL-A8S8-01A	0.96378	High	Age>=60	WHITE	T3	N0	M0	1	669.691			0.3138	38	T3/4
TCGA-YL-A8S9-01A	0.547792	High	Age<60	WHITE	T3	N0	M0	1	992.208			0.3464	28	T3/4
TCGA-YL-A8SA-01A	0.63704	High	Age>=60	WHITE	T2	N0	M0	0	504.981			0.3196	24	T1/2
TCGA-YL-A8SB-01A	0.0876164	Low	Age<60	WHITE	T3	N0	M0	1	1365.03			0.3172	26	T3/4
TCGA-YL-A8SC-01A	0.987323	High	Age>=60	WHITE	T3	N0	M0	1	149.916			0.3322	38	T3/4
TCGA-YL-A8SI-01A	-0.0601183	Low	Age>=60	WHITE	T3	N0	M0	1	1403.49	1	1403.49	0.3157	21	T3/4
TCGA-YL-A9WH-01A	1.22071	High	Age>=60	WHITE	T3	N1	M0	0	421.146			0.3165	51	T3/4
TCGA-YL-A9WI-01A	0.439931	High	Age<60	WHITE	T3	N1	M0	0	1600.75			0.3211	37	T3/4
TCGA-YL-A9WJ-01A	0.678499	High	Age<60	WHITE	T3	N1	M0	1	1455.76			0.3418	22	T3/4
TCGA-YL-A9WK-01A	0.659777	High	Age<60	INDIAN_AFRICAN	T2	N0	M0	1	995.167			0.3473	27	T1/2
TCGA-YL-A9WL-01A	1.31638	High	Age<60	WHITE	T2	N0	M0	1	729.855	1	729.855	0.3378	25	T1/2
TCGA-YL-A9WX-01A	0.44928	High	Age>=60	WHITE	T3	N1	M0	1	1485.35			0.3366	5	T3/4
TCGA-YL-A9WY-01A	1.17334	High	Age<60	WHITE	T3	N1	M0	1	754.512			0.3309	29	T3/4
TCGA-ZG-A8QW-01A	0.421622	High	Age>=60	WHITE	T3	N1	M0	0	92.7113			0.3219	28	T3/4
TCGA-ZG-A8QX-01A	-0.221358	Low	Age<60	WHITE	T1	N0	M0	0	435.94			0.3199	27	T1/2
TCGA-ZG-A8QY-01A	0.594032	High	Age>=60	WHITE	T2	N1	M0	0	398.461			0.3152	51	T1/2
TCGA-ZG-A8QZ-01A	0.753005	High	Age>=60	WHITE	T2	N1	M0	0	303.777			0.3215	26	T1/2
TCGA-ZG-A9KY-01A	1.04236	High	Age>=60	WHITE	T1	N1	M0	0	128.218			0.3332	55	T1/2
TCGA-ZG-A9L0-01A	1.27443	High	Age>=60	WHITE	T3	N1	M0	0	350.133			0.3249	35	T3/4
TCGA-ZG-A9L1-01A	0.378816	Low	Age>=60	WHITE	T1	N1	M0	0	1284.15			0.3181	24	T1/2
TCGA-ZG-A9L2-01A	1.12244	High	Age>=60	WHITE	T3	N0	M0	1	177.532			0.3309	25	T3/4
TCGA-ZG-A9L4-01A	1.19709	High	Age<60	WHITE	T1	N0	M0	0	1092.81			0.3332	24	T1/2
TCGA-ZG-A9L5-01A	1.11864	High	Age<60	WHITE	T2	N1	M0	0	895.552			0.3366	42	T1/2
TCGA-ZG-A9L6-01A	0.136614	Low	Age<60	WHITE	T1	N0	M0	1	654.897			0.3341	27	T1/2
TCGA-ZG-A9L9-01A	1.04773	High	Age<60	WHITE	T2	N1	M0	1	50.3008			0.3215	33	T1/2
TCGA-ZG-A9LB-01A	0.485739	High	Age>=60	WHITE	T2	N0	M0	0	575.007			0.3235	52	T1/2
TCGA-ZG-A9LM-01A	0.820592	High	Age>=60	WHITE	T2	N1	M0	0	372.818	0	372.818	0.3418	30	T1/2
TCGA-ZG-A9LN-01A	0.638195	High	Age<60	WHITE	T1	N1	M0	0	113.423			0.3322	31	T1/2
TCGA-ZG-A9LS-01A	1.11393	High	Age<60	WHITE	T2	N1	M0	0	508.926	0	508.926	0.3278	18	T1/2
TCGA-ZG-A9LU-01A	0.459688	High	Age>=60	WHITE	T2	N0	M0	0	571.062			0.32	18	T1/2
TCGA-ZG-A9LY-01A	0.732596	High	Age<60	WHITE	T2	N1	M0	0	364.928	0	364.928	0.3084	33	T1/2
TCGA-ZG-A9LZ-01A	0.850734	High	Age>=60	WHITE	T3	N0	M0	0	682.513			0.306	30	T3/4
TCGA-ZG-A9M4-01A	0.513839	High	Age>=60	WHITE	T2	N1	M0	0	539.501			0.325	32	T1/2
TCGA-ZG-A9MC-01A	1.39232	High	Age>=60	WHITE	T2	N1	M0	0	448.762			0.3238	28	T1/2
TCGA-ZG-A9N3-01A	0.340264	Low	Age>=60	WHITE	T1	N1	M0	0	344.215			0.3385	48	T1/2
TCGA-ZG-A9ND-01A	0.442142	High	Age<60	WHITE	T1	N0	M0	0	404.379	0	404.379	0.3249	25	T1/2
TCGA-ZG-A9NI-01A	0.634675	High	Age>=60	WHITE	T2	N0	M0	0	130.19	0	130.19	0.3079	83	T1/2

## Sheet: km_GSE70770
sample	riskscore	riskgroup
GSM1817723	1.12156	Low
GSM1817725	1.60358	High
GSM1817727	1.13453	Low
GSM1817745	1.22946	High
GSM1817747	1.19341	High
GSM1817749	0.767054	Low
GSM1817753	1.38535	High
GSM1817769	1.01782	Low
GSM1817770	1.16143	High
GSM1817773	1.06829	Low
GSM1817777	1.52435	High
GSM1817782	1.36755	High
GSM1817789	1.06351	Low
GSM1817792	1.17789	High
GSM1817793	0.963052	Low
GSM1817794	1.18403	High
GSM1817810	0.777219	Low
GSM1817815	1.51375	High
GSM1817820	0.934471	Low
GSM1817906	1.51203	High
GSM1817907	1.14751	High
GSM1817908	1.37218	High
GSM1817909	1.09413	Low
GSM1817910	1.11299	Low
GSM1817911	1.12034	Low
GSM1817912	0.879968	Low
GSM1817913	1.10303	Low
GSM1817914	1.17019	High
GSM1817915	1.25239	High
GSM1817917	0.891706	Low
GSM1817918	1.81816	High
GSM1817919	1.06063	Low
GSM1817921	1.0165	Low
GSM1817922	1.48142	High
GSM1817925	1.29571	High
GSM1817929	1.47317	High
GSM1817930	1.03263	Low
GSM1817931	0.804439	Low
GSM1817938	0.744249	Low
GSM1817941	1.22861	High
GSM1817944	0.885924	Low
GSM1817948	1.18607	High
GSM1817949	1.1424	Low
GSM1817955	0.992484	Low
GSM1817956	0.909101	Low
GSM1817957	1.0157	Low
GSM1817962	1.30593	High
GSM1817965	1.43333	High
GSM1817968	1.15374	High
GSM1817972	1.37985	High
GSM1817976	1.33001	High
GSM1817977	0.918099	Low
GSM1817978	1.00342	Low
GSM1817981	0.979278	Low
GSM1817982	0.903293	Low
GSM1817983	0.842747	Low
GSM1817984	1.60863	High
GSM1817986	1.35985	High
GSM1817988	1.5545	High
GSM1817990	0.926771	Low
GSM1817991	1.26353	High
GSM1817993	1.00409	Low
GSM1817996	1.1745	High
GSM1817999	1.37639	High

## Sheet: km_GSE70769
sample	riskscore	riskgroup
GSM1817906	1.51203	High
GSM1817907	1.14751	High
GSM1817908	1.37218	High
GSM1817909	1.09413	Low
GSM1817910	1.11299	Low
GSM1817911	1.12034	Low
GSM1817912	0.879968	Low
GSM1817913	1.10303	Low
GSM1817914	1.17019	High
GSM1817915	1.25239	High
GSM1817917	0.891706	Low
GSM1817918	1.81816	High
GSM1817919	1.06063	Low
GSM1817921	1.0165	Low
GSM1817922	1.48142	High
GSM1817925	1.29571	High
GSM1817929	1.47317	High
GSM1817930	1.03263	Low
GSM1817931	0.804439	Low
GSM1817938	0.744249	Low
GSM1817941	1.22861	High
GSM1817944	0.885924	Low
GSM1817948	1.18607	High
GSM1817949	1.1424	Low
GSM1817955	0.992484	Low
GSM1817956	0.909101	Low
GSM1817957	1.0157	Low
GSM1817962	1.30593	High
GSM1817965	1.43333	High
GSM1817968	1.15374	High
GSM1817972	1.37985	High
GSM1817976	1.33001	High
GSM1817977	0.918099	Low
GSM1817978	1.00342	Low
GSM1817981	0.979278	Low
GSM1817982	0.903293	Low
GSM1817983	0.842747	Low
GSM1817984	1.60863	High
GSM1817986	1.35985	High
GSM1817988	1.5545	High
GSM1817990	0.926771	Low
GSM1817991	1.26353	High
GSM1817993	1.00409	Low
GSM1817996	1.1745	High
GSM1817999	1.37639	High
