# Supplementary material for: Single-cell RNA combined with bulk RNA analysis to explore oxidative stress and energy metabolism factors and found a new prostate cancer oncogene MXRA8
Source: Aging (Albany NY). 2024 Mar 4;16(5):4469–502. doi: 10.18632/aging.205599 (PMC10968713; doi:10.18632/aging.205599)
Supplement: Supplementary Table 7 [file aging-16-205599-s008.xlsx]

## Sheet: check_model_data
Supplementary Table 7. Analysis of immune checkpoint expression associated with model genes and high and low risk groups.
ADORA2A	BTLA	CD160	CD244	CD274	CD96	CSF1R	CTLA4	HAVCR2	IDO1	IL10	IL10RB	KDR	KIR2DL1	KIR2DL3	LAG3	LGALS9	PDCD1	PDCD1LG2	TGFB1	TGFBR1	TIGIT	VTCN1	Riskscore	MYLK	FBLN1	PTGDS	MXRA8	PTN	COL1A1	THBS2	MT1E
0.129008	0.0826203	0.128668	0.175885	0.438705	0.286097	1.33749	0.281958	0.311019	0.371846	0.046908	4.02529	2.01409	0.0552653	0.0122231	0.794448	0.857792	0.487477	0.127152	2.80235	2.93504	0.206429	0.0610037	-0.245049	4.66742	4.69363	6.80585	3.40375	7.11395	3.83497	1.18304	6.0284
0.0384647	0.0753677	0.0702919	0.162167	0.442049	0.567287	2.14591	0.401248	0.827306	1.35807	0.0997634	4.11121	1.98204	0	0	1.2232	1.4851	0.296042	0.442854	2.7802	2.892	0.349771	0.0267495	0.00275922	4.43014	5.76537	3.90529	3.56351	5.98005	5.06973	2.15498	7.0673
0.0961092	0.149754	0.249893	0.241206	0.61765	0.667374	2.69692	0.503677	1.09692	0.981359	0.108199	3.91898	2.35947	0	0.0215338	0.727106	1.67226	0.348535	0.267301	3.43462	2.619	0.371851	0.518616	1.20297	2.75708	3.32368	3.48059	3.65053	2.4044	5.27377	2.39985	1.81052
0.0686624	0.0547769	0.0366573	0.0507021	0.206934	0.295151	1.2753	0.157934	0.420606	0.518492	0	4.66433	2.07267	0	0.0228453	0.416187	0.918878	0.420491	0.131012	3.08402	2.47434	0.111742	0.121382	0.0160955	5.28086	5.23217	5.99163	3.5009	4.8378	4.42771	1.12152	4.65577
0.0759221	0.0239136	0.0941401	0.0308698	0.17037	0.123488	0.91968	1.27988	0.276399	0.105402	0.14291	4.2124	0.766328	0	0	1.61783	0.643695	0.291712	0.143405	2.02136	2.64769	0.0806389	0.048267	0.320171	4.07665	3.94853	3.97335	2.83048	1.81763	5.65691	1.82523	1.49612
0.0647539	0.0248234	0.0307506	0.0530135	0.32781	0.176211	1.23231	0.228359	0.648792	0.358414	0.0155155	3.83994	1.07293	0	0.0119981	1.53086	0.768653	0.228959	0.124901	1.5306	2.77741	0.0740525	0.145329	-0.0944914	0.992005	2.31401	2.62561	2.56096	6.90084	3.08588	0.814704	7.28969
0.0938456	0.0504296	0.136659	0.227713	0.410654	0.352932	2.49463	0.157313	0.887134	0.278781	0.0799619	3.33027	3.19561	0	0	0.485023	1.79601	0.429326	0.270883	3.40162	2.71768	0.139848	0.828502	0.834606	3.97906	4.13772	3.4721	3.65041	3.48684	5.85656	2.66702	3.72222
0.0512744	0.0147244	0.0540879	0.0378028	0.383674	0.325855	2.03811	0.170215	0.410349	0.450323	0.0273999	3.9486	1.72093	0	0	0.563443	1.15138	0.159127	0.461371	2.35199	3.25682	0.153256	0.0705492	-0.213894	3.70208	5.31723	4.24898	2.84565	5.61077	5.06296	1.51233	7.60765
0.0675035	0.708259	0.160945	0.266749	0.685667	1.33907	3.37332	0.881388	1.47079	1.98918	0.154227	4.1532	2.43579	0	0	1.48736	2.40496	1.21387	1.08605	3.47658	2.92535	1.37099	0.0211176	0.0111086	4.90305	6.61066	5.73965	4.03649	7.53509	5.39791	2.11608	7.70985
0.0208056	0.0235742	0.0364163	0.0503703	0.186981	0.212328	1.85954	0.169277	0.565925	0.327982	0.072202	4.07339	1.26769	0	0	0.470216	1.117	0.230039	0.280495	2.64339	2.82942	0.180563	0.0287405	-0.0026324	5.04882	4.62095	4.49169	2.76822	4.10942	5.33411	1.87667	4.96448
0.0914892	0.617883	0.0902043	0.372572	0.845939	1.56389	3.92169	1.68641	3.123	2.37322	0.342912	3.79557	3.55403	0.0916587	0.0605676	1.1042	3.62091	0.977891	1.47498	5.30896	4.09729	0.894767	0.59827	2.15843	4.56544	7.31513	3.75222	6.54455	3.98836	10.4001	7.66478	4.94973
0.0153119	0.0626357	0.0427058	0.108755	1.32779	0.240219	1.72193	0.144721	0.688472	0.776871	0.0947158	3.36202	3.00861	0	0	0.539861	1.18169	0.172461	0.265177	2.50338	3.31646	0.16346	0.44845	0.620851	2.67615	3.13367	2.86345	3.06168	2.82307	3.64073	1.23682	2.23263
0.0529492	0.33671	0.109624	0.748739	0.663391	0.828071	4.40764	0.7613	1.94541	1.16359	0.958306	4.60543	2.68807	0.0134461	0	1.02581	2.47703	0.596096	0.81738	3.7048	3.33128	0.489575	0.973187	0.413662	4.8863	6.28658	6.18278	4.15871	5.76803	5.02363	3.30809	5.76874
0.0624598	0.208592	0.104	0.31064	0.510461	0.862192	3.33954	1.05405	1.36471	1.77548	0.554789	4.65542	2.70137	0.0159005	0.0104132	0.853909	1.45942	0.533623	0.822724	3.53384	3.01779	0.35981	0.174667	0.536071	5.07187	5.90043	5.19461	4.1044	4.43504	6.28134	3.16734	4.99371
0.0479198	0.2435	0.0604537	0.248963	0.534198	0.691015	2.58977	0.726498	0.982105	2.23262	0.280694	4.58111	1.79145	0	0.0158673	0.784826	1.20078	0.473555	0.417182	2.95467	2.89353	0.485311	0.487827	0.224299	3.67511	4.34247	5.60161	3.28541	4.81159	4.72783	2.14627	6.50482
0.0298352	0.0169947	0.0546561	0.0219535	0.194041	0.208964	1.80926	0.072668	0.529443	0.515894	0.0471489	4.00089	1.785	0.0187548	0.0122866	0.647295	0.882319	0.169072	0.0780219	3.03281	2.07821	0.128951	0.333997	0.574518	2.01028	3.25021	3.32313	2.07422	2.4326	3.66324	1.07214	5.11552
0.0858063	0.209616	0.327437	0.916957	1.05315	1.67764	3.51224	1.0377	1.64901	1.59177	0.466333	4.57434	2.35199	0	0.0445392	1.4511	3.10192	0.622335	0.821563	3.7051	3.28159	0.61597	3.25424	0.18779	5.44926	5.38448	5.65981	3.23639	4.69384	3.24319	1.77191	5.04625
0.0167238	0.0670958	0.0727338	0.185098	0.291291	0.487663	2.70487	0.556244	0.797176	0.963832	0.295591	3.79793	2.14698	0.00840214	0.0054976	0.733178	1.474	0.606583	0.241121	3.90157	2.2588	0.324266	0.758093	0.677915	3.43551	3.93704	4.94494	3.09283	4.25506	4.81416	1.12128	4.97193
0.0548864	0.280971	0.149503	0.430592	0.78344	1.11944	3.0884	0.882561	1.2143	1.43928	0.318002	4.86346	2.18412	0	0.0101414	2.36125	1.98065	0.751608	0.938598	3.74927	3.41036	0.639333	0.809003	0.431522	4.86924	6.40177	5.95466	4.08203	4.73771	5.71638	2.73848	6.23833
0.0817809	0.0584451	0.152666	0.341976	0.404573	0.447219	2.15122	0.265281	0.587124	0.362789	0.178062	4.14533	1.78835	0	0	0.613677	1.09908	0.176504	0.0990803	2.34838	3.05204	0.242672	1.28931	-0.300086	4.94399	4.95742	5.20393	2.84695	5.79463	3.56373	1.11979	4.03824
0.0488784	0.153631	0.172941	0.211693	0.551932	0.568254	2.16636	0.268399	0.663581	1.36033	0.185192	4.21505	2.21825	0.0154825	0	0.570109	1.07473	0.238077	0.242802	2.19744	3.3111	0.279175	0.259308	-0.347858	4.44572	4.74662	4.72901	2.79992	5.74509	3.71472	1.54454	6.30029
0.115729	0.765137	0.157468	0.461705	0.727507	1.37013	2.56974	1.14221	1.35502	1.3569	0.113323	4.37075	1.72739	0	0	1.17105	1.76342	1.16098	0.836704	2.80705	3.67504	1.3393	0.300289	0.346683	3.35509	4.35046	4.86493	3.07685	5.37324	5.33317	2.96369	5.29397
0.221109	1.68134	0.285238	0.708187	1.4149	2.44194	3.62468	1.80888	2.27708	2.30891	0.562181	3.38993	2.46714	0	0.0276775	2.15623	2.82757	2.28793	1.81865	3.68542	3.72072	2.62182	0.0692397	1.39398	2.74964	3.80485	5.4779	3.58715	2.60116	6.67032	4.25515	1.12357
0.0376045	0.0122933	0.0837273	0.144305	0.286274	0.349966	2.2394	0.291422	1.02828	0.570541	0.223968	3.77396	3.17663	0	0	0.361421	1.4284	0.191779	0.295619	3.66289	3.16797	0.18275	0.0150002	1.02749	3.76305	3.49419	1.82147	3.34148	2.34528	6.42442	3.9015	6.91392
0.198549	0.073537	0.159428	0.258505	0.821386	0.797554	2.53428	0.975735	1.26771	1.63442	0.39261	3.14148	1.30287	0.0165661	0.0216189	1.62946	1.71982	0.449753	0.559859	2.43942	3.76658	0.589444	0.978778	0.452137	2.84836	3.36954	4.21354	2.46492	2.48081	4.32137	1.67814	2.74746
0.0911277	0.376782	0.160952	0.56743	1.11255	1.24955	3.25936	1.46915	1.69292	3.52889	0.464771	4.18155	3.81356	0.0414727	0.0379981	2.16639	2.66098	1.66275	0.922883	3.90145	2.73171	1.19764	0.663431	0.989114	3.93676	3.91394	4.38867	3.20129	2.79006	6.07913	3.26089	4.30638
0.0645324	0.0369487	0.106322	0.0785391	0.506127	0.21179	2.59814	0.0638327	1.78298	0.270075	0.275136	3.18221	3.9708	0	0	0.335169	1.9503	0.16476	0.572044	3.22231	3.55034	0.0701984	0.0596943	0.940405	3.29546	3.60842	2.21512	3.45424	2.36263	7.69368	4.56779	8.24636
0.0645861	0.39699	0.107489	0.304724	0.766369	1.2963	3.18448	1.13443	1.4521	1.89294	0.48329	4.09824	2.80787	0.0164508	0	1.03498	1.94325	0.669277	0.663983	3.11339	3.56748	0.883372	1.73171	0.0147098	5.8734	5.15818	5.76967	3.13522	4.74348	5.34012	2.41832	5.14563
0.0264222	0.066491	0.0887232	0.174854	0.845649	0.664559	3.05914	0.439811	1.07399	0.5552	0.269871	4.23318	2.55926	0.0492435	0.0323777	1.59572	1.32901	0.479333	0.511978	2.93505	4.02214	0.508999	1.1972	-0.0490804	6.1051	5.7043	6.08517	3.78947	5.19889	5.53224	2.62104	5.36861
0.0638552	0.14098	0.0804425	0.32468	0.636264	0.850835	2.77143	0.85245	0.9244	1.26095	0.42799	4.24783	2.42864	0	0.0212222	0.977203	1.53252	0.302616	0.366079	2.97819	2.9642	0.349535	1.3389	0.162898	4.90699	5.09285	4.66866	3.09139	3.86819	3.96082	1.80638	4.17501
0.021362	0.0361555	0.050244	0.135558	0.296766	0.250921	2.08272	0.17985	0.56652	0.386136	0.21177	3.79858	2.33407	0	0	0.403113	1.03623	0.151797	0.276887	2.08255	2.77445	0.124133	0.488447	-0.133873	4.69675	4.38068	4.43832	2.74481	3.27381	3.69029	1.21715	3.67327
0.0593899	0.420052	0.0902364	0.291933	0.538382	1.12536	2.56784	1.23423	1.05815	1.41429	0.422388	3.65829	1.85631	0	0	0.736144	1.47956	0.862659	0.485048	2.81062	3.4547	0.738131	0.704659	0.0496714	3.51732	4.75499	5.59283	2.78381	4.6268	3.57739	2.0027	6.57076
0.0204187	0.0345668	0.0375069	0.108956	0.428178	0.195618	1.53748	0.234131	0.602625	0.355575	0.0948913	3.67483	1.8593	0	0	0.907027	0.705042	0.199658	0.113876	1.95755	3.01397	0.207321	0.0212072	-0.483524	4.54797	4.56398	4.69176	2.65083	5.61675	3.55749	0.856383	5.74552
0.0774016	0.126553	0.065652	0.0904627	0.482895	0.438956	2.35238	0.195784	1.04344	0.525451	0.0442629	4.38701	1.61019	0	0	0.727173	1.51216	0.196304	0.28093	2.42181	3.37986	0.194311	0.968554	0.0496039	4.19788	4.32435	4.91804	2.9247	3.61383	3.75715	1.88747	4.69715
0.0276117	0.0992631	0.12673	0.252688	0.411819	0.482578	2.42884	0.535121	1.01224	0.959135	0.206152	4.20088	2.36244	0	0	0.710439	1.85728	0.229551	0.496828	3.02683	3.59181	0.385095	0.923477	0.439606	4.78439	4.545	3.95555	3.87513	4.31182	6.02295	3.55692	6.40099
0.0380341	0.244328	0.134146	0.495571	0.644025	0.865337	4.2896	0.556518	1.81294	1.01959	0.393999	4.36299	2.46795	0.00874923	0.00572494	1.12183	2.23035	0.812495	0.516583	4.17326	3.60093	0.5021	1.03295	0.819118	5.67037	5.94435	6.45062	4.51501	4.81162	7.06585	3.60542	3.46941
0.0245556	0.196633	0.160687	0.171167	0.697787	0.626111	2.38213	0.205123	0.903348	1.53518	0.196051	3.88217	2.8477	0	0	0.975028	1.42314	0.205665	0.685893	2.65319	3.78101	0.130321	0.0170516	-0.101002	4.44244	4.18241	5.37554	2.68597	3.87963	4.1845	2.33969	7.88028
0.0229665	0.620006	0.0715304	0.0663999	0.435243	0.19656	2.1298	0.172423	0.993129	1.31357	0.0482581	4.65555	1.72032	0	0	0.150668	0.957551	0.110455	0.191875	2.29774	3.76745	0.136738	0	0.557256	2.7582	3.17442	2.63369	2.8112	2.34064	5.67392	3.26989	5.74945
0.0431856	0.0727161	0.0969608	0.316467	0.52545	0.520923	3.01111	0.333916	1.40728	0.427743	0.355159	4.19943	2.59087	0.0181858	0	0.488538	1.41811	0.5677	0.270845	2.96966	3.79326	0.461027	0.929764	-0.133594	5.69452	5.14129	5.63007	2.79473	5.11608	4.46095	2.17379	5.25252
0.0830669	0.0938562	0.0875726	0.176927	0.354194	0.5346	2.63357	0.189875	0.829773	0.666109	0.104849	4.53026	1.28997	0	0	0.415115	1.25015	0.331841	0.249918	2.54286	2.68772	0.19257	0.585725	0.404762	3.65891	4.23089	4.16594	2.88109	3.36038	4.52743	1.9512	2.13028
0.0187452	0.0831522	0.086975	0.241643	0.400937	0.46039	2.86834	0.286716	1.05738	1.34405	0.0587796	4.09097	1.62534	0	0	0.578649	1.68134	0.208687	0.314357	3.46831	3.69044	0.188455	0.964263	0.730795	3.21542	4.31761	4.79737	3.23653	4.36283	5.44042	2.2687	3.84762
0.0831627	0.318186	0.177953	0.690413	0.807239	1.17792	4.24009	0.538712	1.88522	1.86014	0.417302	4.16741	3.1549	0	0.0132871	1.12595	2.44012	0.871416	0.727931	3.96983	3.32119	0.734039	1.55456	0.688261	5.3595	5.84352	5.42377	4.19356	4.47196	6.69577	3.58913	5.34692
0.0466753	0.0266538	0.0732448	0.100826	0.296573	0.220459	2.5478	0.348398	0.914078	0.530007	0.16156	3.80139	1.75001	0.0118337	0.0307378	0.434992	1.79126	0.265653	0.23967	2.72881	2.35379	0.189466	0.852958	0.238905	3.98899	3.95484	4.24943	2.82821	2.93512	5.24332	1.69954	5.82328
0.0442389	0.203336	0.0918823	0.209999	0.921797	0.617416	3.04683	0.970124	1.2135	1.66088	0.237769	3.82628	2.83149	0	0	0.735766	1.84473	1.13168	0.551217	3.31495	2.79859	0.364968	0.64223	-0.0559098	3.64754	5.70423	7.65509	3.16705	6.62424	4.86798	2.15644	8.65107
0.0518655	0.453635	0.148247	0.471754	0.877277	1.34763	3.36284	0.672342	1.62195	2.50786	0.255787	3.97518	4.1255	0.0391465	0	1.08746	2.05524	0.762975	1.17983	3.93194	4.13342	1.05903	1.68061	0.741539	5.64955	5.30919	6.27497	3.72799	4.351	6.70252	4.195	3.12639
0.036648	0.0818294	0.0763298	0.0846278	0.383628	0.378017	1.8734	0.279434	0.494024	1.0828	0.0766117	4.35505	1.73861	0	0.0241057	0.565676	0.950575	0.41878	0.30707	2.19266	2.88804	0.265322	0.454847	-0.38057	4.88062	4.32756	5.47117	2.27564	4.59469	3.21507	1.24448	4.63409
0.0455313	0.253644	0.0945218	0.198988	0.576183	0.863911	2.65154	0.465184	0.932662	0.975181	0.256038	4.45956	2.79443	0.0164579	0	0.7847	1.25184	0.540279	0.777903	2.91954	3.42536	0.616248	0.445363	-0.0561329	5.14992	5.92805	6.27297	3.08619	5.04286	4.60728	2.33889	4.78467
0.00869993	0.194164	0.378705	0.380527	0.789518	1.06459	3.78726	0.323339	1.45072	1.29534	0.534822	4.07679	3.3335	0	0	0.923176	2.01923	0.667075	1.03627	3.57133	3.78692	0.405747	3.05124	-0.0234846	6.5428	5.729	7.30894	3.48208	5.43428	5.78449	2.60093	5.97243
0.011039	0.24238	0.0573493	0.29332	0.642061	0.880659	2.88069	0.526631	1.14727	2.05844	0.237694	4.18921	2.15968	0	0.0090431	1.19266	2.01968	0.433389	0.385602	3.22574	3.08164	0.637095	0.811818	0.329364	4.57911	4.53315	5.31699	3.03057	4.07543	4.74225	2.18887	4.38222
0.0478245	0.10234	0.14278	0.180375	0.567189	0.592179	2.46485	0.231861	0.794487	0.719609	0.121595	4.18735	2.35856	0.00933875	0.00611112	0.541353	1.4181	0.318274	0.5637	3.48322	2.76067	0.241289	0.845824	0.322095	4.90727	5.04588	5.1765	3.66841	5.32414	6.0193	2.17887	6.08668
0.0952766	0.304822	0.148127	0.47827	0.619198	0.789107	3.17033	0.613268	1.23544	1.80112	0.366745	4.34853	2.90886	0.00945752	0.0123514	0.985454	2.00349	0.695781	0.500114	3.47496	3.31481	0.534337	1.40274	0.120543	5.14176	6.14946	6.62288	3.78185	5.57106	5.10451	2.67476	6.82941
0.0532716	0.231057	0.144006	0.240483	0.522097	0.812832	3.17838	0.478443	1.14101	0.900821	0.255378	4.24041	2.48975	0	0	1.15309	1.96648	0.817267	0.612355	3.48915	3.14463	0.548332	2.18132	-0.0496911	5.72887	6.08522	7.67378	3.58063	5.54274	4.65021	2.06794	5.9988
0.0470743	0.126123	0.131009	0.281635	0.531006	0.492483	2.85226	0.116821	1.13145	1.30706	0.215004	3.90208	3.57369	0	0	0.534635	1.75181	0.213834	0.674859	3.13423	3.85291	0.205771	1.30463	0.342302	4.96705	5.37683	5.20293	3.64856	5.28221	5.72252	3.74863	5.05227
0.0660947	0.0928305	0.130766	0.0959928	0.643603	0.566022	2.30731	0.0759924	0.912837	0.577502	0.0354039	3.87359	2.22154	0	0	0.503942	0.968995	0.236603	0.480047	2.29585	3.54381	0.0938732	0.54058	-0.590108	4.86792	4.64535	5.56302	2.20584	6.22261	3.22514	1.22127	6.72187
0.0769838	0.163735	0.192519	0.215222	0.584743	0.716759	2.65818	0.194769	0.663587	1.70275	0.0655382	3.77638	1.78469	0	0.0171596	0.954219	1.26927	0.334468	0.55868	2.7867	3.39704	0.276549	2.05428	-0.148083	5.1918	4.25278	5.81737	2.81742	4.69939	4.44408	1.43195	5.7194
0.0220705	0.221688	0.112884	0.226118	0.962004	0.824757	2.35146	0.465839	1.26159	4.23985	0.18762	3.66628	2.44721	0	0	0.622326	1.63548	0.376421	0.48161	3.04898	3.20092	0.401647	0.58157	0.381274	3.99629	3.92736	3.59657	3.26196	8.3155	5.40572	3.40795	4.46032
0.0409547	0.342318	0.11787	0.38324	0.693494	1.0947	3.32202	0.629217	1.57556	1.37408	0.450204	4.31746	3.3309	0	0	0.902395	2.04811	0.609218	0.795045	3.05065	3.43031	0.750069	1.29387	-0.046856	5.25593	4.63649	6.00406	2.70046	4.94352	3.90432	2.25998	5.29173
0.0327038	0.431298	0.0847759	0.269342	0.78306	0.844658	3.36535	0.609774	1.98802	1.08824	0.165436	3.89109	2.58484	0.00826143	0.00540544	1.00026	2.57487	0.746383	0.750951	3.5903	3.20741	0.62568	1.13991	0.356644	5.16186	6.13664	6.76963	4.38074	6.45876	5.05305	2.91633	4.41004
0.025202	0.262871	0.176644	0.295831	0.53214	1.06528	2.58303	0.362667	1.02663	1.61444	0.153244	4.04168	2.09984	0	0.0165545	0.854048	2.13357	0.845526	0.439539	3.1744	3.42932	0.296384	1.56923	0.217601	4.60106	4.95157	6.49171	3.4237	5.01494	4.89296	2.55331	5.24209
0.0382554	0.0936253	0.0796302	0.211321	0.439948	0.397013	2.85784	0.246121	0.752066	0.589234	0.0564082	4.45144	2.97261	0	0.0375889	0.445001	0.908792	0.180459	0.415205	2.79054	3.73899	0.117816	0.464319	0.239829	4.96773	4.92799	4.10469	3.47701	4.12245	5.7005	3.21028	5.84432
0.06977	0.153668	0.143575	0.337551	0.620451	0.532273	1.75905	0.27292	0.635049	1.18537	0.0738447	4.48533	1.8167	0.0222098	0	0.561586	1.44013	0.228957	0.362336	2.26112	3.08456	0.221918	0.913558	-0.761239	6.48817	4.83935	6.77263	2.49178	6.04557	3.53679	1.30192	5.46682
0.0397608	0.24565	0.0941567	0.344257	0.773123	1.00993	3.48921	0.69228	2.18196	1.88346	0.542956	3.40001	2.85686	0.0426395	0	0.540624	1.94384	0.270064	0.951751	3.37317	4.10741	0.642094	0.460494	1.00004	4.2478	4.96447	4.95054	3.95476	3.38661	6.21238	4.91251	2.27336
0.0448639	0.0859844	0.204723	0.346548	0.528212	0.555375	2.33563	0.135101	0.728162	1.13434	0.169088	4.06827	2.51644	0.0322482	0	0.672962	0.735992	0.181735	0.581109	2.34107	3.95261	0.283845	0.542286	-0.652407	6.51615	5.05043	5.7232	2.48729	6.09071	4.06179	1.70993	5.50533
0.0664958	0.125582	0.0701244	0.255607	0.843511	0.700197	3.41631	0.417769	1.64936	2.50339	0.321905	4.12212	3.97475	0	0.0330442	0.786483	1.77087	0.42886	0.965972	3.49102	3.47138	0.366249	1.25016	0.274348	5.08469	4.90377	5.89046	3.26229	4.8301	5.89656	2.89055	6.42529
0.0232707	0.31005	0.0865277	0.269316	0.520898	0.88167	2.34243	0.337678	1.08787	1.10711	0.159885	3.77934	2.09797	0	0	0.85767	1.30734	0.518215	0.619391	2.62858	3.76069	0.822033	0.019367	-0.661618	5.98131	5.7076	6.73262	2.86315	7.49809	4.49733	1.89944	7.44933
0.0288012	0.103431	0.0527774	0.189752	0.359513	0.560764	3.30659	0.182182	1.31081	1.1809	0.273071	3.66086	3.92027	0	0.00594132	0.619209	1.843	0.268998	0.793162	4.02227	3.75029	0.309693	0.536442	0.748187	4.646	5.30958	5.62781	3.7272	3.95922	6.9127	4.29334	7.16454
0.0592293	0.0947797	0.130701	0.138875	0.301252	0.340005	2.74721	0.221293	1.04668	0.801462	0.131175	3.1659	3.17017	0	0	0.391933	1.66362	0.250959	0.404625	3.23803	2.74377	0.204757	0.457535	0.698921	3.93035	3.78973	4.01051	3.02788	3.05913	5.81941	3.07563	4.38141
0.0331651	0.0741614	0.0306684	0.604514	0.300327	0.445424	2.56946	0.064874	0.891798	0.672903	0.0862665	4.52814	2.06215	0	0	0.687251	1.85064	0.447026	0.270403	3.02979	2.70975	0.181509	2.0086	0.183408	4.60135	4.62521	5.91314	3.08015	3.60535	4.51149	2.03225	5.2116
0.0600312	0.505819	0.119718	0.341694	0.783882	1.27108	2.8727	0.772554	0.973373	2.18124	0.262355	4.09426	2.27517	0.0217688	0.0142663	0.941293	0.957568	0.41259	0.774204	3.12017	3.56649	0.752966	0.798995	0.0607379	5.05325	5.01811	6.04571	2.84397	5.66785	4.94096	2.5	4.60273
0.0536638	0.34192	0.134637	0.374772	0.656198	1.24843	3.57787	0.82065	1.40474	1.82125	0.280039	4.01731	2.84806	0	0.00991205	0.793887	1.65138	0.766859	0.792123	3.71685	3.46574	0.678099	0.818932	0.529406	5.38907	5.30928	4.8839	3.64377	5.85947	6.66822	3.69837	4.7619
0.0398204	0.162245	0.0625716	0.0437707	0.386339	0.534097	2.67272	0.398645	1.45975	1.03741	0.0831451	4.32333	3.01891	0	0	0.299114	1.38237	0.35337	0.362104	3.53269	4.00946	0.277292	0.541515	1.40251	4.1431	5.31298	3.43725	4.25015	2.84445	7.64018	6.3737	1.70433
0.0887819	0.241335	0.0828872	0.349341	0.869448	1.07437	3.4453	0.468838	1.47398	1.18713	0.172019	4.33836	2.67132	0.0134293	0.00879221	0.644782	1.51756	0.55242	0.568737	3.45859	3.55554	0.401932	2.45386	0.484351	5.30509	5.17283	4.95206	3.08069	4.41634	5.98954	3.77882	3.83683
0.0618986	0.368732	0.101301	0.356518	0.693186	1.24179	3.52633	0.615998	1.37167	1.31365	0.261994	4.42153	2.96789	0.0663436	0.0147174	0.881339	1.53734	0.501947	0.891383	3.77224	3.7207	0.816329	0.947275	0.655476	5.10355	5.52753	5.87496	3.7155	4.98558	5.62249	3.65964	3.02262
0.0386553	0.100123	0.0629565	0.134119	0.33546	0.574967	2.72301	0.17797	0.752862	0.672283	0.0719954	4.25926	2.96569	0	0.0212244	0.529045	1.07524	0.377663	0.513959	2.94137	3.08615	0.330629	0.0763332	0.160588	4.58017	5.38832	6.62127	3.57352	4.57912	5.38205	2.92783	5.84367
0.0526402	0.185204	0.154209	0.602284	0.680002	0.997965	4.04235	0.309026	1.6926	0.922893	0.19875	4.19285	2.52324	0.016689	0	0.981949	2.60947	0.500398	0.723	3.30954	3.44636	0.549586	2.96727	0.0959739	5.48515	5.69776	6.00814	3.38146	4.55399	4.68436	2.87621	6.28748
0.0425201	0.114935	0.0691934	0.15971	0.55398	0.491911	2.78555	0.211335	0.937974	0.83005	0.117086	3.40581	3.32792	0	0.0233606	0.439016	1.31197	0.170241	0.504219	2.6169	3.49654	0.21999	0.341432	-0.440152	4.99154	6.04654	6.16348	3.1685	6.32397	5.34635	1.88546	8.51693
0.0156942	0.334008	0.0809938	0.228021	0.464229	0.783795	3.05379	0.381686	1.0405	1.19779	0.0653962	4.16939	2.50148	0	0.0256071	0.485626	1.38439	0.437594	0.576537	3.1077	3.59764	0.30559	0.651398	0.25592	5.02718	5.42524	5.48248	3.46536	5.59871	5.26597	3.33769	4.33187
0.034518	0.0390869	0.0836007	0.199217	0.419841	0.487841	3.2337	0.203714	1.0166	0.259652	0.206633	4.12129	2.90054	0	0	0.715741	1.62522	0.282294	0.626479	3.59446	3.49737	0.253015	1.13142	0.416172	5.22281	5.19165	6.6355	3.76309	4.0005	5.88342	2.58614	5.08915
0.0270519	0.0457238	0.0885339	0.210905	0.423644	0.259934	2.21294	0.224611	0.842223	0.457515	0.120265	3.76372	2.94354	0.0113549	0	0.671731	1.32996	0.209674	0.291273	2.88698	3.09219	0.209588	0.221633	0.0447645	4.32563	4.48183	5.09296	3.06517	4.47024	4.12212	1.58771	6.43464
0.0438546	0.104352	0.0331989	0.216332	0.414712	0.594705	2.21506	0.384297	1.33133	1.56084	0.313843	3.20641	3.33046	0	0	0.569466	1.51133	0.346086	0.500103	3.26026	3.22576	0.277947	0	0.198358	4.92462	6.02316	4.51831	3.45196	7.15495	5.03511	1.64215	2.71224
0.0479731	0.0835905	0.115438	0.09987	0.419476	0.415249	1.92763	0.123222	0.659688	0.632902	0.0563324	4.69663	1.58778	0	0.00884665	0.685483	1.01634	0.237362	0.238587	2.95193	2.83422	0.125011	1.06186	0.328834	3.53327	4.18533	4.29284	2.72567	4.06709	3.97813	1.86872	4.73849
0.089863	0.64608	0.066955	0.385762	0.391322	1.75425	3.54536	0.617182	1.69062	1.0923	0.184266	4.64289	2.81482	0.0115658	0	1.08099	2.37974	1.2796	0.855201	4.62244	3.24119	1.32819	0.714561	1.43409	4.8846	4.776	6.28419	4.36854	3.69817	7.35552	4.949	1.82211
0.00559646	0.0314527	0.017654	0.0955201	0.353547	0.154627	2.22246	0.0756156	0.602536	0.333276	0.0467794	3.50193	2.88956	0	0.0272822	0.359113	0.950572	0.0652336	0.246169	2.52006	2.82698	0.0455924	0.564781	-0.209127	4.38391	5.0934	5.17511	2.76835	4.80342	4.57679	1.76762	7.04061
0.0465342	0.321501	0.0965682	0.2868	0.54485	1.19203	2.53684	0.845225	0.920677	2.50094	0.331251	4.51851	1.70016	0	0.0110193	0.819351	1.49285	0.465531	0.517767	2.62165	2.35936	0.905837	0.814726	0.175336	3.76033	4.24851	4.59267	2.54089	3.22595	4.10787	1.63634	4.47394
0.0718081	0.0599715	0.119313	0.262705	0.422572	0.697259	4.1888	0.215984	1.41213	1.3222	0.157552	4.55112	2.35057	0	0	0.831519	1.76308	0.337055	0.631247	4.10909	3.27677	0.195609	0.918926	0.812875	5.14066	5.90701	6.15889	4.135	4.93688	6.98902	3.99185	4.13955
0.0737195	0.49699	0.163423	0.36573	0.784422	1.50467	3.7027	0.94454	1.69781	2.16803	0.233843	4.15671	3.18189	0.0157017	0.0406986	1.42782	2.64342	1.55633	1.1277	4.20579	2.76501	0.788949	0.832426	0.522056	5.22695	5.61552	6.8799	4.08637	5.3555	5.23281	2.25355	5.2274
0.0500342	0.111096	0.237392	0.326283	0.776685	0.56581	3.29177	0.214787	1.07894	0.51709	0.300888	4.00422	3.63608	0.0126963	0	0.885445	1.72114	0.348209	0.567311	3.34646	3.64059	0.273719	1.40189	0.0835025	5.402	5.91154	6.21939	3.48186	5.5677	5.42548	2.82398	6.20368
0.0388927	0.264767	0.138794	0.269664	0.766168	0.774728	3.51114	0.531933	1.32537	1.43042	0.266318	3.62912	3.21106	0.0122903	0.0160462	0.599801	1.72176	0.478126	0.881071	3.27536	3.5419	0.52576	0.925204	0.0225695	5.62955	6.47889	5.81088	3.37451	5.92469	6.53082	3.39867	6.81252
0.0770419	0.200767	0.132949	0.305846	0.556109	0.765423	3.65471	0.563017	1.2279	1.1522	0.423399	3.73234	2.25923	0	0	0.75479	1.58843	0.275415	0.845958	3.07388	3.25574	0.544148	1.6167	-0.16597	5.21541	5.89528	6.09021	3.14269	6.43733	4.43799	2.45035	6.5136
0.0744693	0.184195	0.133503	0.259369	0.463087	0.760331	2.81378	0.546957	1.25918	1.03488	0.12411	3.63815	3.59644	0	0	0.482675	1.4385	0.258375	0.621495	3.49224	3.61888	0.393541	1.06413	0.991848	4.27329	4.07172	4.42748	3.38799	3.32176	6.41644	4.46715	2.52195
0.0703362	0.207746	0.185437	0.33796	0.66425	0.869091	3.09058	0.514197	1.18986	0.806919	0.285554	4.28489	3.21037	0	0	0.578753	1.61027	0.924834	0.845756	3.14847	3.01779	0.327122	2.94643	0.0930154	5.43182	5.16587	6.27898	3.09588	4.55371	5.57758	2.50996	5.04645
0.020967	0.277025	0.212186	0.235423	0.426181	0.705927	2.60607	0.325788	0.89473	1.98549	0.138626	4.61884	1.64644	0	0.0171867	0.527963	1.0319	0.469606	0.494452	2.75765	3.1094	0.288899	0.591642	0.479603	3.63207	4.21888	4.99013	2.96349	3.69792	4.75571	2.18978	1.98594
0.054534	0.335886	0.17913	0.538345	0.668855	0.896878	3.90756	0.404708	1.5675	1.12742	0.209791	4.34753	4.04191	0.0456727	0.00756304	0.70476	1.91921	0.653583	0.644756	3.29165	3.27141	0.410647	2.81444	0.158764	6.18828	6.14025	5.64608	3.529	4.63284	5.23319	2.81626	3.78612
0.0225525	0.146932	0.0759657	0.251883	0.560118	0.495562	2.88181	0.19914	0.847068	0.946203	0.15949	3.71462	2.98763	0	0	0.468528	0.876014	0.569843	0.532988	2.61373	3.28966	0.263809	0.291243	-0.497913	5.55463	6.12758	5.68194	3.01131	7.05817	5.23953	2.1145	7.5702
0.0459956	0.156147	0.115853	0.225332	0.351116	0.828083	3.11276	0.505922	1.14153	0.708467	0.175958	4.35956	2.36523	0	0.033614	0.635182	1.16951	0.330005	0.739913	3.1956	3.56517	0.38106	0.0973466	0.535972	4.73537	5.70153	5.55697	3.83044	4.32923	6.51423	4.31217	4.72054
0.0125746	0.130037	0.139704	0.254251	0.32729	0.356477	2.45477	0.131231	1.25962	1.40239	0.0907856	2.97417	2.35444	0	0.0306878	0.148088	1.14254	0.0968733	0.398537	2.30595	3.73021	0.21749	0.848261	0.966301	2.4045	2.59427	2.41614	2.52048	1.13044	5.43088	3.19526	0.671889
0.057481	0.161091	0.160957	0.321702	0.660687	0.848381	3.44151	0.385706	1.30622	0.973517	0.319298	4.16265	3.61244	0	0	0.693282	1.6179	0.300752	0.697383	3.63901	3.67675	0.351984	1.72924	0.4126	5.84921	6.51621	6.15357	4.17711	6.26308	6.2837	4.62714	4.95005
0.0868983	0.487252	0.202125	0.390522	0.734231	1.40618	3.63581	0.644687	1.49751	1.29337	0.389198	3.98966	3.91197	0.0261556	0.0256494	0.935053	1.9504	0.792107	1.13609	3.77835	3.65598	1.05381	0.271916	0.199127	6.44125	7.45139	7.29841	4.31762	6.00812	6.03212	3.98758	5.7066
0.0182015	0.0342147	0.170082	0.10371	0.366718	0.460187	2.0634	0.082147	0.623982	0.383751	0	4.16481	2.50321	0.0152127	0.00996191	0.757868	0.883393	0.138459	0.257111	2.58448	2.557	0.0856693	0.422245	-0.456233	5.7778	3.71384	6.26921	2.46263	5.68274	3.61704	1.23323	5.81963
0.0369274	0.18729	0.154991	0.459503	0.602094	0.759307	3.70406	0.312363	1.47931	0.745239	0.461387	4.19278	2.72628	0	0.00872213	0.833981	2.0293	0.321666	0.716794	3.34356	3.45288	0.36811	2.0849	-0.058339	5.43326	6.11852	5.72	3.43832	7.16872	4.77188	2.98176	6.92347
0.0712838	0.162613	0.0695218	0.2632	0.531478	0.584011	2.4259	0.396105	0.853915	2.04478	0.199962	4.35269	2.16328	0.0140113	0.00917391	0.761253	1.76259	0.422267	0.320405	2.7756	2.47984	0.29629	2.25639	-0.0994466	4.97115	4.79354	6.07862	2.88672	4.71185	4.26182	1.74616	5.11617
0.0464383	0.23417	0.119492	0.324291	0.723417	1.15827	3.50146	0.761725	1.29885	1.19085	0.536785	4.24595	2.67974	0.0292539	0	0.799559	1.82313	0.633668	1.13023	3.51891	3.59249	0.536428	1.23147	0.148758	5.04126	5.97728	6.93105	3.91346	6.4912	6.01661	2.77686	6.92991
0.08303	0.224004	0.0444307	0.120276	0.549495	0.713214	2.42119	0.535199	1.05479	1.19044	0.0591609	3.74541	2.57709	0.069649	0	0.533111	1.01548	0.850332	0.506011	2.60308	2.92244	0.472401	0.509924	0.526139	3.91312	3.77754	2.83351	2.98461	3.55812	4.91736	3.17183	3.34613
0.133744	1.01733	0.26464	0.650988	1.55346	2.27831	3.57751	2.21953	2.23748	3.73137	0.315039	4.20879	1.63303	0	0	1.42132	2.69555	1.6803	1.05959	3.52775	3.06457	1.2877	1.03669	0.434284	3.44574	4.84044	6.08869	2.82727	3.23688	3.94599	2.55731	6.67171
0.0216951	0.0784036	0.0565787	0.137589	0.380251	0.251197	2.17179	0.247678	1.00148	0.227084	0.0456087	5.00355	0.990674	0	0.0265949	0.823084	1.42013	0.229958	0.272843	3.09159	3.6613	0.183446	1.81067	0.47694	4.97346	4.0683	4.92509	3.59989	3.41931	5.83144	2.33472	3.75497
0.0591376	0.0813429	0.135117	0.19319	0.393082	0.53265	2.39751	0.198023	0.935221	0.504322	0.135606	4.3061	2.96216	0	0.0325744	0.613016	1.33042	0.331361	0.522925	3.25535	3.16917	0.26883	0.941805	0.28933	5.54431	5.0254	4.97105	3.93752	5.29456	5.73719	3.20505	5.81303
0.0523507	0.0592319	0.142806	0.160282	0.387394	0.413218	2.22491	0.068636	0.506802	0.343975	0	4.0902	2.25432	0.0220859	0	1.21303	1.15072	0.343404	0.323247	2.88834	2.81886	0.0715932	0.63648	-0.434954	5.76829	5.04413	6.79663	3.17671	6.50779	4.12217	1.12352	6.82345
0.0554565	0.152006	0.177641	0.181672	0.371084	0.518543	2.76675	0.538165	0.942233	0.453661	0.0198374	4.38889	2.09223	0.0234108	0	1.03455	1.59576	0.487064	0.366801	3.30952	2.86121	0.281922	1.03525	0.0273703	5.24426	5.20854	7.14618	3.79848	5.34907	4.41497	1.63319	6.04501
0.0269818	0.146728	0.238057	0.574806	0.850297	0.601653	2.58361	0.457732	1.01409	0.404522	0.111081	4.35474	2.54377	0.0225624	0	1.61926	2.47927	0.535385	0.223238	3.58799	2.7396	0.192766	2.65929	0.252672	5.4952	5.85333	6.04655	4.49169	5.02508	4.15992	1.59507	5.48921
0.0392266	0.0444091	0.0166981	0.0572102	0.116896	0.0842987	1.07613	0.177388	0.442015	0.482261	0.0167611	4.72857	0.540258	0	0	0.64127	0.960936	0.555969	0	2.60298	1.4413	0.0537343	0.0958893	0.948983	1.11973	2.94537	3.49866	2.65606	1.91825	4.24945	1.60821	1.47493
0.106255	0.180608	0.200368	0.208285	0.802495	0.809817	2.76359	0.661212	1.19919	1.33745	0.18535	3.67675	2.91043	0	0	1.72556	1.94065	0.597501	0.32212	3.81788	2.92509	0.327661	0.324768	0.818385	4.0212	5.90209	5.24866	4.60878	4.79756	6.60805	3.15005	5.63229
0.143495	0.247655	0.400154	0.42145	0.776931	1.39075	3.70673	0.686724	1.14626	0.660223	0.794987	4.50406	3.18074	0	0.0129427	1.37067	2.57234	1.00315	0.855948	4.71556	3.51814	0.517974	4.48059	0.578783	5.58629	6.65406	7.85611	4.33297	5.44983	6.33538	1.9354	5.50956
0.134689	0.142199	0.177447	0.582913	0.640931	0.560454	2.72881	0.331198	0.823281	0.949421	0	4.0377	1.68321	0	0.0153278	1.19468	1.81479	0.346792	0.379313	3.00515	3.10466	0.260146	2.28859	-0.312144	5.99732	5.46219	6.70248	3.42625	5.57857	4.75132	1.32245	6.7307
0.0288043	0.0566193	0.0527831	0.132496	0.263863	0.183637	2.25196	0.250302	1.02405	0.192338	0.146489	4.50805	2.63413	0.0181043	0	1.24466	2.28713	0.274999	0.226298	4.1478	2.75317	0.101492	1.35464	0.714488	3.86467	4.80992	6.06217	4.43156	3.49565	6.13447	2.00377	9.18614
0.00570179	0.00646504	0.0239303	0.0494505	0.0402522	0.0570601	0.562747	0.0662521	0.330595	0.14656	0.0240203	4.66828	0.560581	0	0	0.829417	0.570739	0.68943	0.0300712	2.11029	1.6651	0.0195314	0.0313127	0.957277	0.72	2.85518	1.11972	3.42329	0.919733	4.90728	2.2646	5.38326
0.0418612	0.0551347	0.101026	0.282193	0.339643	0.489018	1.78261	0.483262	0.911964	0.727842	0.142761	4.06314	1.4691	0.0176235	0.0115439	0.957948	1.44039	0.314188	0.373825	3.04993	3.07627	0.241722	1.38078	-0.0865563	3.24002	5.24511	7.0387	2.85087	4.71735	4.33418	1.2874	8.92964
0.0209988	0.129916	0.155141	0.347734	0.654126	0.732485	3.06828	0.471599	1.13128	1.23717	0.413077	3.86867	2.32124	0.034896	0	0.873018	1.7422	0.57954	0.920273	3.6276	2.91329	0.407452	1.08664	0.967851	3.4504	5.48669	5.79902	3.75949	3.62954	6.46235	2.81197	1.66979
0.0903712	0.0938402	0.118124	0.191954	0.331623	0.150252	1.64265	0.278689	0.623256	0.337096	0.032579	3.83836	2.13735	0	0	0.636307	0.926982	0.10406	0.28649	1.98468	2.94666	0.0473644	0.113811	-0.583355	4.54304	5.06404	5.02814	3.30639	6.64482	3.70007	1.20347	8.10641
0.034715	0.0901098	0.0184319	0.107612	0.325072	0.27819	2.469	0.348185	1.52115	1.28408	0.29127	4.36043	1.65826	0	0	0.263628	1.67995	0.215392	0.247452	3.12108	3.18698	0.145588	0.101777	0.938432	2.86177	3.86132	3.58761	3.0826	4.11058	6.2746	2.89658	1.64126
0.0273279	0.0835782	0.0779643	0.267202	0.386718	0.732045	2.552	0.732815	1.35008	1.25283	0.229319	4.37422	1.49032	0	0	1.33819	2.11177	0.35048	0.35581	3.19231	2.81485	0.325855	1.41261	0.144224	4.06874	4.88877	6.32226	3.59386	5.29734	4.75742	1.70734	7.00535
0.0596797	0.100104	0.0934157	0.227071	0.4447	0.606419	2.45702	0.209919	0.918639	0.815797	0.16749	4.34777	2.14057	0	0	1.02561	1.66247	0.597496	0.292354	3.4659	2.68203	0.314399	1.39549	0.10537	4.72342	5.09767	6.15619	3.48545	5.15248	4.36504	1.34868	6.84819
0.114688	0.800205	0.183223	0.38248	0.623397	1.06545	3.41528	0.836333	1.16078	1.30343	0.200487	3.92771	2.99713	0	0	1.13226	2.23937	1.3323	1.02965	3.65332	2.9654	1.09512	2.09304	0.10861	5.7755	6.4639	6.53746	4.12445	6.21165	6.15654	2.59867	7.12643
0.0137994	0.0765611	0.119369	0.117204	0.270235	0.283102	1.62341	0.273928	0.623191	1.28303	0.0576189	4.32999	1.106	0.0172614	0	0.635837	1.09217	0.330381	0.140434	2.17101	1.9558	0.119036	0.128545	-0.120355	4.1523	4.01511	5.36357	2.9754	3.40575	3.39049	0.762224	4.61025
0.0820925	0.0648479	0.137336	0.284676	0.475877	0.58952	2.71249	0.575264	0.847437	0.347314	0.205096	4.04518	3.14043	0	0	0.927704	1.70078	0.34256	0.459759	3.40681	3.08935	0.207926	1.27277	0.0313824	6.29884	5.99063	6.69243	3.97638	5.31455	5.4441	2.76702	6.24696
0.13557	0.0751127	0.195025	0.210606	0.505637	0.665438	2.91623	0.215341	0.81575	0.915941	0.0387766	3.63697	2.81104	0	0.0200963	1.1636	1.39587	0.49348	0.348702	3.54439	2.86971	0.122298	0.682802	0.0926814	5.08026	5.69027	6.9726	4.03893	6.36805	4.80832	1.45463	6.10757
0.104876	0.300302	0.247727	0.356041	0.61323	0.873995	2.53204	0.682844	0.857241	1.45688	0.0268773	4.34127	1.72758	0	0	1.11666	1.70001	1.01471	0.470221	2.95074	2.89058	0.800705	1.20321	-0.136422	4.70248	4.73776	6.83933	3.12474	5.5449	4.3022	1.21767	6.05295
0.094089	0.106258	0.240169	0.260399	0.466181	0.326674	2.21739	0.240933	0.685059	0.437744	0.0730634	4.30407	1.87812	0.0219707	0.0286556	1.28036	1.94327	0.180997	0.244463	3.25703	2.96646	0.177267	1.35699	-0.00797696	5.79856	4.48958	6.91969	3.57729	4.55146	4.28765	1.71938	6.09118
0.126399	0.479884	0.145812	0.296842	0.423449	1.55369	3.30791	1.23217	1.49402	1.97296	0.120811	4.33659	1.98204	0	0.0107738	1.47063	2.41609	1.36231	0.618918	4.52882	3.04598	1.08542	0.188427	1.07268	3.68151	5.7102	6.27906	4.34924	4.17443	5.92171	2.14144	4.13646
0.106693	0.37768	0.139221	0.389334	0.630793	0.731008	3.19561	0.522518	1.30453	0.731199	0.326808	4.13409	3.27842	0	0.0224868	1.14478	2.38526	0.424973	0.375942	3.43996	3.09552	0.627515	2.20841	0.534046	4.44933	4.10229	4.61264	3.56025	3.24282	5.65329	2.4302	6.56517
0.0462889	0.281805	0.0804941	0.390711	0.535335	0.818206	2.80244	0.600176	0.850118	1.25307	0.46482	3.55162	2.8868	0.0195048	0.0504511	0.772581	1.7926	0.65192	0.604322	3.08291	2.75054	0.713422	0.0215578	-0.0159394	4.80545	6.70834	5.17883	3.82381	5.59476	4.88633	1.79871	6.83914
0.0532911	0.0668397	0.0684129	0.205899	0.419146	0.307216	2.23356	0.189767	0.689695	0.818351	0.0747495	4.08117	2.83755	0	0	0.765421	1.11495	0.320525	0.27209	3.144	2.71618	0.111818	0.216813	-0.139134	5.39525	4.90569	6.3218	3.52638	6.3263	4.61711	1.33399	6.4978
0.0883368	0.170344	0.12287	0.318605	0.659973	0.689445	2.83293	0.403406	1.12646	1.20104	0.181234	4.22318	3.15832	0	0	1.20135	1.77606	0.644862	0.570577	3.70188	3.20889	0.346728	1.31437	0.126993	6.0498	4.97507	6.65144	3.69844	6.28224	4.63073	2.08946	5.11439
0.0579916	0.107729	0.0744132	0.155364	0.582767	0.34703	1.90361	0.527734	0.830753	0.434653	0.133045	3.99947	1.34062	0	0	0.498443	1.10461	0.304531	0.16504	2.05972	3.36735	0.225779	0.589783	-0.279097	3.37247	3.97381	3.78415	2.26734	3.62452	3.04153	0.947852	7.84432
0.100584	0.11356	0.28969	0.328952	0.679777	0.674017	2.9605	0.747055	0.976992	1.25861	0.327813	3.80089	3.13553	0.0215819	0.0281497	1.07471	1.73804	0.586179	0.778016	3.73711	3.15502	0.329776	0.89415	0.140228	6.29718	5.98536	7.07787	4.09753	5.83584	5.90977	2.66634	6.12878
0.0193301	0.0856882	0.108806	0.681486	0.677081	0.812139	3.04	0.591575	1.16923	1.83116	0.137606	4.0847	2.99812	0.0479381	0	2.36075	2.47845	0.963307	0.85846	4.34721	2.83427	0.742613	1.59356	0.148015	6.38543	8.9503	8.67004	5.37958	7.29634	5.58702	1.28494	5.18278
0.0821565	0.450993	0.161398	0.287606	0.564128	1.1673	2.05467	0.927517	0.863965	2.0502	0.236619	4.24468	2.0775	0	0.00600551	1.01239	1.76657	0.818085	0.386437	3.10955	2.63394	0.954812	1.38367	-0.266364	5.50019	5.06795	5.45844	2.66011	6.06164	4.74002	1.10363	6.49992
0.108988	0.186437	0.0981903	0.377883	0.562247	1.0321	3.07207	0.828647	1.30981	1.90864	0.115263	4.34541	2.75343	0	0	0.862569	1.72895	1.00281	0.572346	4.3654	3.2113	0.571603	0.626201	0.590833	5.37336	6.27714	7.28153	4.24139	5.16556	6.81569	3.27305	6.62144
0.0361959	0.0808352	0.0680355	0.123652	0.716435	0.804818	3.27469	1.0036	1.86759	0.684925	0.104873	4.04842	2.78286	0	0	0.745251	1.82496	0.478257	0.863782	3.74592	3.39076	0.363821	0.768807	0.679011	5.4419	6.18787	5.45757	4.64385	5.40617	7.0701	3.84154	4.35779
0.054882	0.0485203	0.184563	0.250581	0.239144	0.440847	1.52769	0.619949	1.10699	3.80863	0.219572	4.06613	1.78432	0.015485	0	1.29174	1.06398	0.319397	0.270508	1.81625	3.47812	0.324338	0.252135	0.85724	1.12918	0.648632	0.155681	2.94917	0.430822	4.25573	0.627617	3.809
0	0.0475321	0.0515554	0.0612144	0.084457	0.0457741	2.02616	0.0685695	0.841675	1.21584	0.0149753	2.95517	2.4545	0	0	0.121408	0.976736	0.0278983	0.166297	1.8094	2.88441	0.0145913	0.355634	0.345625	2.17107	2.35212	1.65645	1.89675	2.61082	3.58615	1.43655	2.97573
0.014351	0.0482566	0.0523402	0.188252	0.211834	0.284803	2.83179	0.148931	1.17741	0.808977	0.0744774	4.47874	1.0057	0	0.0234223	1.49789	2.26854	0.492093	0.0868302	3.62983	2.43312	0.063133	2.67978	0.257267	3.83233	5.79973	6.95535	3.8994	4.87161	4.13278	0.982836	6.82659
0.0158949	0.0533812	0	0.0461667	0.176371	0.143788	0.846467	0.272807	0.482194	0.201092	0	3.37722	0.652107	0.019879	0.0130249	1.21562	0.976294	0.273512	0.147993	2.25488	1.7493	0.161188	0.127072	0.324429	1.27672	3.22466	4.41778	2.75804	2.36047	3.37852	1.26391	7.29768
0.0371602	0.0503431	0.150823	0.13693	1.05745	0.150723	2.11023	0.0294773	0.650262	0.460219	0.0624648	3.36974	1.94192	0	0	0.646748	1.42075	0.76878	0.414752	3.31719	2.95044	0.0459054	2.47727	-0.0737171	4.98526	6.27572	6.51214	3.39599	5.63643	4.76551	1.45651	6.53908
0.0150836	0.0617168	0.0979948	0.275967	0.456161	0.58955	2.52097	0.23048	0.971986	1.35789	0.0731144	3.97756	2.21562	0.13294	0.016456	1.20027	2.14377	0.66329	0.729782	3.46401	2.84944	0.308892	2.2424	-0.0296066	6.21484	5.29647	7.5227	3.35368	4.69264	4.54104	1.68215	4.84945
0.0652037	0.0446896	0.0620327	0.0762604	0.117616	0.228458	1.37821	0.150207	0.423777	0.537833	0.0280047	4.3239	0.806961	0.0166108	0	0.340758	0.638202	0.209004	0.135353	2.48179	2.03417	0.181001	0.590653	0.150631	2.94839	3.48103	4.83601	2.65258	3.01511	3.38691	1.12755	5.92416
0.0603349	0.0376219	0.0971966	0.17767	0.743029	0.445345	2.37418	0.253353	1.46633	2.36135	0.269938	4.26819	2.39302	0	0	1.70899	1.72086	0.493792	0.327329	3.66953	3.14947	0.347797	0.255332	-0.069403	5.32077	5.42037	7.13039	3.7625	7.07294	5.04353	1.75243	8.36229
0.0291099	0.0572141	0.15444	0.0838292	0.414532	0.320126	2.279	0.151678	0.786221	0.415919	0.0758867	4.3881	1.52481	0	0	0.851211	2.09737	0.165149	0.194776	3.20812	2.89416	0.125918	2.17701	0.0394937	4.80211	4.46121	6.04705	3.25334	5.63644	4.62787	1.86866	6.69381
0.0375044	0.0142936	0.0460637	0.0457373	0.36372	0.249092	1.73383	0.293633	0.850533	0.420768	0.0783768	3.68647	1.81802	0	0	0.928573	1.60356	0.344709	0.247046	3.51694	2.86434	0.156816	0.165566	0.635017	3.34445	5.74005	4.50673	4.08846	4.09641	5.60215	2.36183	6.91113
0.023724	0.079175	0.0738493	0.216887	0.326363	0.633184	1.87492	0.298129	0.801746	1.95268	0.12925	4.42969	1.00508	0	0	1.34014	1.60597	0.650783	0.134859	2.84323	3.10231	0.255842	2.27365	-0.0645377	3.81301	4.58582	6.38321	3.20599	4.81649	4.02599	1.67757	8.21802
0.0340288	0.0822263	0.116372	0.18177	0.247039	0.408279	1.56512	0.220602	0.732994	0.766149	0.0595795	4.42275	2.9861	0.0143035	0.00936552	0.897121	1.40876	0.527906	0.301862	2.88002	2.27234	0.209249	1.21221	0.0513544	4.89813	4.57491	5.98697	3.00407	4.2393	4.08961	1.4034	3.86667
0.0399813	0.0130776	0.0421841	0.114343	0.23412	0.2222	2.07234	0.0671408	0.663648	0.239592	0.0482904	3.70675	1.86002	0	0	0.554022	1.54338	0.318265	0.164777	2.51997	2.27475	0.0470658	0.433305	-0.298952	4.66916	5.24312	5.53033	3.63816	5.2485	3.54954	0.828813	7.33394
0.01114	0.189875	0.0234255	0.680728	0.379237	0.640102	2.51835	0.717134	1.09228	1.51039	0.135655	4.19817	1.77066	0	0.0973437	3.08623	3.46202	0.592032	0.783674	3.68365	2.39307	0.576206	0.090074	0.122505	5.34587	7.83668	8.4438	5.2777	6.21761	5.51856	2.32373	7.42192
0.0190594	0.114974	0.130647	0.147106	0.42882	1.00812	2.50707	0.402946	1.29133	1.47644	0.12647	4.44069	2.37124	0	0	0.813302	1.82263	0.770269	0.325916	3.73102	3.21948	0.236972	1.77112	0.614374	4.83668	5.0477	5.45189	4.01713	4.33784	5.85941	3.17617	5.76419
0.0370028	0.0768628	0.145105	0.134939	0.321956	0.419649	1.61232	0.102196	0.515564	0.368604	0.0447024	4.60671	2.14363	0	0	0.839402	1.04225	0.270374	0.381491	2.53637	2.9075	0.0893264	0.764846	-0.541913	5.41627	5.27304	6.45769	2.95017	6.34437	3.87851	1.17331	6.82805
0.0412643	0.0293716	0.0805826	0.166622	0.249505	0.310544	1.86954	0.138064	0.369426	0.318651	0.0436993	4.11777	2.39953	0	0	1.32929	1.15678	0.323983	0.285259	3.29161	3.17017	0.160076	0.407689	-0.187431	6.21762	5.42677	7.78718	3.72261	6.48871	4.13801	1.68297	5.10101
0.0450455	0.0758149	0.0630221	0.246331	0.242988	0.348354	1.44649	0.273927	0.688657	1.63235	0.0319746	4.3938	1.15625	0	0	0.886399	1.15679	0.472927	0.153754	2.2082	2.10325	0.209726	0.178616	-0.382043	3.89095	3.9576	6.2323	2.72094	4.83655	3.04405	0.560393	6.78533
0.0225863	0.237511	0.201569	0.454721	0.692452	1.14868	3.08873	0.576786	1.52743	2.37984	0.191758	4.72734	2.79011	0.0141847	0	1.40346	2.39055	0.749059	0.519653	3.68035	3.42225	0.403971	0.984109	0.214524	5.41553	5.92815	6.96179	3.87951	5.5926	5.56532	2.46795	6.02007
0.0488678	0.194816	0.0413876	0.057209	0.3773	0.325639	1.7812	0.184323	0.72856	0.340046	0.0312683	4.71101	3.14148	0.0123966	0	1.35878	1.43374	0.317312	0.488665	3.43021	2.69448	0.0927592	0.246255	0.343728	5.96312	5.55357	6.89266	4.68774	5.32903	5.93778	2.37233	3.74859
0.00771762	0.0346857	0.0560917	0.0773853	0.583234	0.219011	1.51602	0.226186	0.65397	1.89961	0.0324401	3.86004	1.81953	0.0192537	0	0.613416	1.20093	0.131917	0.239622	2.31612	2.22767	0.122497	0	0.291541	2.98152	3.46383	4.60423	2.63163	3.11342	4.12253	1.46172	3.36752
0	0.210228	0.0478219	0.169821	0.309076	0.588091	1.43626	0.395775	0.997722	1.37885	0.032177	4.55074	1.83716	0	0	0.369563	1.47108	0.507982	0.359465	2.44264	3.33437	0.277868	0.288145	-0.172063	5.35568	5.02874	6.56369	3.46926	4.85909	4.11398	3.04244	5.74488
0.0270931	0.0607398	0.111121	0.152231	0.389111	0.499627	2.7228	0.224931	1.06834	0.708184	0.0707074	4.59774	2.21166	0	0.0222167	1.08299	1.52853	0.271186	0.506011	3.46789	2.86974	0.281338	0.458584	0.038758	6.66678	6.65788	6.54853	4.40043	6.08558	5.53182	2.64668	5.29881
0.0408073	0.134372	0.160128	0.256692	0.442244	0.57843	2.44208	0.286736	0.890504	1.33964	0.0432158	4.64077	2.68793	0	0	1.22549	2.1538	0.416093	0.748728	3.4203	3.13744	0.28069	2.63251	-0.0582642	6.24723	6.13078	8.1588	4.31242	6.58371	5.89614	3.09038	7.02283
0.0280203	0.0627938	0.0633211	0.125845	0.251167	0.406938	1.25796	0.142006	0.451539	2.04507	0.105971	3.74846	2.66316	0.0234322	0	0.734438	1.12281	0.419137	0.120255	2.99405	3.41986	0.202585	0.272951	0.28527	3.58458	3.42683	4.267	2.85443	5.62846	4.36877	1.60289	5.10013
0.0254723	0.0848915	0.230252	0.229638	0.586699	0.634312	2.30144	0.14495	0.557018	1.53428	0.0108543	4.35082	3.00815	0.0128167	0.0167325	1.09027	1.33428	0.367049	0.416579	2.68892	2.97132	0.115544	1.57954	-0.644397	6.54144	5.55239	7.42109	3.08639	6.17951	4.16962	1.51303	6.86258
0.00564811	0.0442436	0.0585512	0.0728778	0.526488	0.174346	1.45262	0.0656411	0.51405	0.228341	0.0587687	3.89173	1.95414	0	0	0.548791	1.28302	0.118471	0.134043	2.16334	2.95432	0.0384407	0	-0.610559	4.29607	4.35774	4.31441	2.57393	7.59005	5.25418	0.933714	9.32338
0.0168249	0.219196	0.210253	0.214971	0.85931	0.678413	3.00101	0.188026	1.07269	0.671984	0.0813686	4.26489	2.91271	0	0	1.42181	2.22603	0.68251	0.817677	3.62431	3.17929	0.26529	4.63348	-0.031108	6.00491	6.05179	7.26054	3.61133	6.17046	4.30898	1.95729	5.36433
0.0245603	0.0551212	0.0513847	0.158225	0.287843	0.378361	1.67928	0.131042	0.588245	1.38494	0.101372	4.37271	2.32007	0.0367547	0	0.471288	0.970903	0.415477	0.314437	2.18115	2.98463	0.185367	0.268479	-0.60162	4.77406	4.94083	5.33582	2.8411	7.05198	3.55586	0.896902	6.88842
0.0287785	0.214073	0.00612547	0.16128	0.396926	0.655112	2.39712	0.524408	0.923886	1.55981	0.0244389	4.18124	2.00552	0	0	1.10062	1.78839	0.699031	0.34651	2.82462	3.03846	0.334284	1.09673	0.169027	5.10975	5.72182	6.13685	4.20929	4.22154	5.76937	2.87818	5.84071
0.038055	0.114078	0.0626059	0.0632705	0.557371	0.904959	2.05047	0.380823	1.15639	1.33457	0.144341	4.6619	1.09474	0.0673924	0	0.789292	1.52613	0.592089	0.274843	3.46627	2.68368	0.487659	0.690239	0.428038	3.94017	4.82671	6.23101	3.38675	5.10216	4.82608	1.72578	4.10759
0.0332969	0.15386	0.111196	0.11858	0.562302	0.544722	2.76283	0.465685	0.891972	1.1576	0.0696934	3.68777	2.88699	0.0209401	0	0.929779	1.68265	0.353727	0.621178	2.85214	2.85604	0.189838	0.768445	-0.499635	6.20585	7.27475	8.09569	4.25467	7.15862	5.57821	1.87598	7.36871
0.00812004	0.328905	0.0671958	0.394819	0.339146	0.771005	3.00285	1.05856	1.22119	1.78785	0.0171591	4.82569	1.96493	0	0	2.24738	3.35386	1.37901	0.485711	4.07619	2.4149	0.552136	1.60436	0.598783	3.15907	6.19875	8.28055	4.8432	5.5043	4.72716	1.76911	7.28187
0.0319589	0.14437	0.121478	0.178231	0.631066	0.746412	2.73669	0.522752	0.85698	1.65809	0.0854915	4.09687	3.21328	0.0229432	0.0150381	0.868218	1.30995	0.663491	0.773285	3.30268	2.89417	0.74714	0.340222	0.0868874	5.29469	5.08727	5.48817	3.0668	5.51068	5.03617	1.76886	4.85329
0.0310432	0.0638151	0.12173	0.186916	0.442452	0.445096	2.74948	0.156678	0.860087	0.967568	0.0543941	4.05261	2.24929	0	0	0.67524	1.70772	0.147767	0.402018	2.79555	3.10248	0.169637	1.05283	-0.291671	5.65815	5.9471	6.27682	3.34619	6.16218	5.32308	2.22524	6.57888
0.0304629	0.0413037	0.0321471	0.0619092	0.359698	0.261555	2.10915	0.20407	0.928461	0.349804	0.0386354	3.89943	2.11182	0.015341	0.0100461	0.627229	1.13513	0.266836	0.414612	2.92789	3.28255	0.110132	0.257125	0.00577846	4.87518	5.5003	5.62896	3.19958	5.83489	5.64556	2.51867	5.78696
0.00859628	0.0290418	0.0882825	0.0497474	0.21238	0.236714	1.71225	0.0502721	0.786275	0.999249	0.0360985	3.71593	2.45207	0	0	0.720526	1.81625	0.19187	0.238939	3.12361	3.05897	0.0695211	0.605528	0.565336	3.64059	4.24253	4.56477	3.69236	3.61635	6.1858	3.09897	7.13554
0.0112639	0.351154	0.168828	0.0328158	0.950121	1.35774	2.03817	1.68912	1.2313	1.54343	0.358916	4.01614	1.84028	0	0.0455582	2.10667	2.27821	1.5876	0.430192	3.38956	3.55746	0.967198	0.62053	-0.129993	4.12261	6.53303	9.50121	4.14533	7.3766	3.67186	2.0609	7.87532
0.0314836	0.029774	0.0656993	0.19624	0.67175	0.548849	2.14738	0.130331	1.02974	0.492223	0.118682	4.18725	1.49339	0.0649542	0.0258241	0.574716	1.41989	0.486595	0.168471	2.75634	2.95072	0.241539	1.59557	-0.471448	4.90993	4.3624	5.44123	2.73216	7.96814	3.10774	1.17667	7.45251
0.0593706	0.0744253	0.122632	0.132129	0.362743	0.496734	2.12901	0.38368	0.528562	0.424506	0.0422034	4.68597	2.48461	0.0167702	0	0.92345	0.838211	0.374369	0.412549	2.96127	2.81262	0.0679142	0.452659	-0.191778	5.59471	5.0822	6.22838	3.31528	6.28538	4.61948	1.34252	5.16827
0.0535299	0.0659446	0.110802	0.164841	0.56612	0.639379	2.9723	0.407346	1.37346	1.05222	0.293753	4.0999	2.81527	0.012365	0.00809436	0.989457	2.07732	0.473541	0.30044	3.97866	3.10616	0.325528	1.7221	0.484064	5.21485	5.46495	6.76981	4.11624	5.12962	6.3316	2.65795	6.18584
0.0203613	0.0901509	0.0892057	0.108658	0.313828	0.274349	2.07207	0.153737	0.893568	0.307527	0.173834	3.99725	2.37629	0	0	0.459858	1.51163	0.154151	0.435943	2.67333	2.61872	0.0823029	0.0760711	-0.590922	5.36948	6.23901	6.36689	3.59772	7.76392	5.17442	1.63699	9.43381
0.0475848	0.61584	0.243032	0.264633	0.874912	1.7741	3.30977	1.73175	2.24384	2.93358	0.18359	3.64519	1.9213	0.0218656	0.0214419	1.02666	1.99022	1.73461	1.31401	3.65873	4.21729	1.1677	0.368902	0.842955	4.08652	4.44648	4.10035	3.35899	8.6228	7.57449	5.23137	3.08072
0.0298284	0.103619	0.0622836	0.27006	0.376869	0.576098	2.52157	0.242427	1.05359	0.936051	0.122433	4.40423	2.53861	0	0	0.758739	1.52666	0.413035	0.295745	3.41224	2.57674	0.327399	0.73243	-0.034884	5.38895	5.27506	6.4069	3.36609	6.8366	5.07703	1.91752	6.18559
0.0349853	0.304099	0.083033	0.174611	0.775899	1.06499	4.0496	1.38735	2.01228	1.23705	0.290427	3.74769	3.42107	0	0	0.972513	2.38761	0.670107	1.23592	4.74983	3.43621	0.926301	0.0414452	0.65007	6.55095	8.33698	8.49302	5.11726	7.0274	7.51832	4.03499	4.08297
0.0281442	0.056884	0.0297015	0.187484	0.184889	0.204084	2.37176	0.189369	0.911955	0.125899	0.0238995	4.44353	2.01174	0.0281975	0	0.288816	1.48306	0.189873	0.161887	3.26102	2.82628	0.14506	0.721987	0.620687	4.18307	6.07924	5.86867	4.13319	4.41608	6.00862	2.40594	2.18555
0.0539404	0.219325	0.111635	0.429374	0.27498	0.937231	2.18316	0.294011	1.18686	1.6488	0.0903195	3.84993	1.50204	0	0.0178858	1.03239	1.74823	0.774235	0.419768	2.95027	3.74547	0.713605	0.0449713	0.410614	3.14221	4.0309	4.84916	3.5064	3.44174	4.86722	2.3148	7.70711
0.0254905	0.13229	0.0598399	0.168984	0.295643	0.559216	1.81606	0.553011	0.816708	0.845174	0.0535107	4.27849	1.0467	0.0160147	0	0.788786	1.40855	1.02444	0.260055	2.37562	2.44994	0.429383	2.00448	0.350691	2.524	3.70375	5.35907	3.42563	3.2492	3.76492	1.6432	4.95255
0.0263009	0.0875953	0.0817191	0.0610174	0.293181	0.326963	2.37164	0.139973	0.983638	0.349825	0.0333698	4.8781	2.38882	0.0132355	0	0.48942	1.20423	0.223863	0.605859	3.01358	3.47472	0.13258	0.559745	0.0499925	4.97249	5.48137	6.49509	3.61365	5.04322	5.13247	2.87353	6.66246
0.120081	0.223952	0.189246	0.386502	0.719139	0.816928	3.20813	0.637281	1.64491	1.35751	0.189919	3.96374	3.17707	0	0.0239202	1.49997	2.72353	0.781569	0.923071	3.97245	3.06137	0.489737	1.86314	0.102012	7.21845	6.89575	7.64074	4.38793	5.79086	7.01783	2.81363	6.26919
0.00610872	0.02068	0.0128702	0.061558	0.114086	0.0822501	1.03078	0.0240143	0.281132	0.238843	0.025723	4.89837	0.810063	0.0303455	0	0.784017	0.848179	0.498142	0.163972	2.20821	1.96295	0.033325	0.167913	0.00232429	3.68135	4.92403	5.6993	3.30468	3.48669	4.35963	1.19567	4.66509
0.00466771	0.549032	0.0437594	0.0929986	0.375949	0.675029	1.96509	0.482731	0.661971	1.6649	0.0771838	4.0331	1.9588	0.0116632	0	0.552738	1.27623	0.352068	0.556924	2.15635	2.97299	0.605984	0.0446356	-0.271724	3.19294	5.59329	5.39089	2.86321	5.7588	4.28248	1.10519	6.30453
0.035909	0.0349205	0.0538293	0.0742859	0.202473	0.2714	1.65186	0.146412	0.494425	0.959316	0.0218552	4.49885	1.15554	0	0	0.318455	0.584324	0.174458	0.115009	2.073	2.6504	0.0765949	0.26242	0.0908409	2.43153	3.60724	3.10309	2.55598	5.14229	4.04014	1.36007	5.33648
0.0534721	0.0604976	0.0928173	0.229474	0.590063	0.808222	2.75003	0.413507	1.17792	0.710667	0.12292	3.63368	2.90004	0	0.0196851	0.941882	1.97487	0.750492	0.517452	3.38363	2.48634	0.227003	0.904381	0.313055	3.48524	5.18658	5.18285	3.4076	8.30302	4.8955	2.14168	4.77457
0.38897	2.12881	0.465092	1.15944	2.89983	3.16389	5.09761	3.49999	3.15733	4.60594	1.31512	4.66353	3.12893	0.0492224	0.0323637	2.75307	4.09815	2.71387	2.43663	4.90064	3.47092	2.39609	1.61058	1.17478	4.68572	6.18487	7.23923	4.60933	4.52644	5.92051	4.27624	4.34421
0.0839256	0.0146269	0.105539	0.0620581	0.635331	0.289596	2.00827	0.380834	0.687702	0.836389	0.0539342	3.69276	3.11907	0.0107821	0.0210678	0.791967	0.96466	0.177197	0.439097	2.92245	2.95529	0.13343	0.236814	0.900592	2.27155	2.35386	2.47438	4.27279	2.78687	4.23941	1.62883	6.21097
0.024052	0.106036	0.176547	0.410308	0.413317	0.837562	4.38684	0.340277	2.066	1.29177	0.236566	3.7361	3.79612	0.039942	0.0391726	0.461262	1.93547	0.756269	0.665551	4.47508	3.59031	0.27759	0.355518	1.29477	4.90102	5.33552	5.56773	4.95103	3.97812	7.2954	5.66841	5.40251
0.0485541	0.0816532	0.0699694	0.233664	0.345685	0.461242	2.44282	0.183193	0.868134	0.837284	0.137196	4.53017	2.31566	0.0153786	0	0.628484	1.45713	0.297632	0.286856	3.27113	2.8785	0.234767	1.09619	0.412899	3.70271	4.21096	4.93452	3.10647	3.59331	5.01611	2.3176	6.99915
0.0721537	0.265005	0.124663	0.385249	1.04326	0.824792	3.99052	0.585349	1.40224	1.8384	0.749559	3.58713	3.76914	0	0	0.849734	1.93547	0.62528	0.504117	4.133	3.42466	0.379912	1.86312	0.94126	4.92366	5.618	5.46972	3.79198	4.22627	6.92189	3.50934	2.58197
0.0634975	0.14021	0.076284	0.260762	1.17404	0.426326	2.86426	0.425744	1.17708	0.658609	0.542484	4.06317	3.03449	0	0.015104	0.62105	1.40778	0.213341	0.368053	2.72198	3.13774	0.232399	0.341556	0.00171626	3.45833	4.10297	3.89242	2.25032	6.06144	4.59491	2.33419	7.30905
0.020603	0.0463181	0.0484759	0.151631	0.188362	0.439219	2.51045	0.236094	0.829328	0.94117	0.242378	4.47692	3.59092	0.0129359	0.00846867	0.283427	1.01519	0.254072	0.40614	3.09951	2.85182	0.171518	0.110624	0.652286	3.25269	4.57046	3.72718	2.97761	2.91619	5.71488	3.14353	5.44182
0.0509659	0.154823	0.0360635	0.324395	0.301527	0.559649	3.41888	0.488525	1.25268	1.03422	0.139644	4.57341	1.95903	0.014366	0	0.748247	1.96658	0.326062	0.383599	3.49969	3.21159	0.277127	0.460835	1.00166	3.4756	4.95315	5.11784	4.24276	5.23699	6.13951	3.76516	2.16077
0.0401748	0.0398733	0.063124	0.0441597	0.260816	0.225928	1.50096	0.161801	0.571769	1.2342	0.0529899	3.99721	2.14844	0	0.00831357	0.284441	0.9388	0.258256	0.23294	2.00439	2.88352	0.146544	0.172649	-0.0437853	3.91686	3.82524	4.47037	2.15607	2.95541	4.17953	1.25032	3.21733
0.0778138	0.297441	0.0763346	0.328394	0.542559	1.25082	2.68757	0.865561	0.911778	2.46325	0.0358677	4.42039	1.68805	0.0142337	0	0.918925	1.93156	0.751085	0.43392	3.31243	3.01113	0.588912	0.776366	0.520376	3.32344	4.59756	5.532	3.04909	3.79461	4.5793	2.26725	4.85348
0.047653	0.0242173	0.0881947	0.113891	0.292434	0.424521	2.87558	0.151469	0.990664	0.945585	0.0668933	3.86226	3.78145	0	0	0.551772	0.97968	0.39049	0.237095	3.62305	2.92725	0.0863043	0.220822	0.533824	5.05029	4.53671	5.05335	3.04031	3.64795	5.17396	2.10247	3.04052
0.0169974	0.333271	0.170104	0.449176	0.853149	1.47332	3.88143	0.707419	1.87035	2.90038	0.342528	4.63275	2.68495	0.136126	0.0549281	1.14321	2.17331	0.890696	1.11747	3.8897	3.44771	0.705683	0.588267	0.543851	5.2695	5.75482	5.18003	3.95351	4.64108	5.43935	3.2641	5.84497
0.0410475	0.16071	0.142233	0.302126	0.643988	0.929925	2.98868	0.490855	1.15158	1.16074	0.632838	4.08587	3.43998	0.0103916	0.01357	0.975408	1.82948	0.549591	0.735681	3.50205	4.28646	0.41766	1.24076	0.568389	4.67486	4.91431	5.76303	3.48588	4.14626	4.88264	2.87076	3.23047
0.0292682	0.31775	0.108229	0.297007	0.622644	1.44732	3.21847	1.0154	1.59865	1.41722	0.511725	3.85792	2.97237	0.0147363	0	1.16896	2.2242	1.06869	0.661169	3.93588	3.56753	0.69667	1.76866	0.539675	4.66315	5.88729	5.64347	3.94141	5.34627	5.26117	2.72225	5.63425
0.0505578	0.0724243	0.0580847	0.19851	0.426722	0.322041	2.19665	0.314619	1.1168	1.00939	0.159425	4.24686	1.73861	0	0.0152362	0.733652	1.46376	0.322857	0.229529	2.56167	3.05174	0.1613	0.769876	-0.23236	4.90357	4.34744	5.60219	2.8231	5.42437	3.7373	1.0768	4.94669
0.0623112	0.07047	0.0911873	0.256202	0.589346	0.757491	3.03247	0.365218	0.998078	0.801942	0.314131	4.32725	3.0439	0	0	1.05094	2.20821	0.479174	0.585747	3.69627	3.42348	0.267321	2.82193	0.0355054	5.92637	5.76709	6.79327	3.29483	5.00564	5.21639	2.55878	7.18156
0.0116091	0.0262001	0.0952459	0.228888	0.294873	0.297827	2.23146	0.1633	0.816736	0.543087	0.0485893	4.04677	2.54297	0	0.00951041	0.749954	1.36736	0.253744	0.410833	3.18301	3.5544	0.130337	0.423672	0.19234	5.8614	5.32149	5.64647	3.64325	4.65738	6.33884	2.97463	5.26494
0.0227453	0.0510872	0.0993777	0.159123	0.170824	0.183802	1.75982	0.258739	0.732243	0.22474	0.1054	4.38253	1.69044	0	0.00935332	0.538451	1.26786	0.220914	0.207834	2.37361	3.14357	0.135471	1.71534	0.259776	3.44969	3.35847	4.60817	2.38329	1.88502	3.75972	2.50041	4.97857
0.0665234	0.241196	0.19472	0.563525	0.796555	1.09767	3.46031	0.765539	1.52234	1.72497	0.226581	4.31755	3.16913	0.0169528	0.033058	1.35638	2.16579	0.859422	0.586876	4.11657	3.24439	0.527872	1.37935	0.654753	5.19573	5.595	6.15689	4.54832	5.39252	6.03717	2.79405	5.45129
0.025826	0.237869	0.0932256	0.346775	0.793135	0.870321	3.17556	0.392414	1.61383	3.08378	0.298346	4.78409	1.694	0	0	1.28166	2.16327	0.809283	0.56594	3.49491	2.96655	0.649713	0.964036	0.196689	4.35925	4.63151	5.68415	3.40709	5.96882	4.95439	1.75562	7.15007
0.0488504	0.184868	0.113464	0.208952	0.627486	1.08511	3.64509	0.494367	1.24861	2.11637	0.328291	3.84616	2.82365	0.0103341	0.0201955	0.815577	1.50624	0.29596	0.728052	3.69306	3.30368	0.504721	0.562735	0.567898	5.08742	5.62711	5.51588	3.78014	4.73295	6.69573	3.51443	5.04469
0.0311614	0.0794333	0.122907	0.236994	0.58175	0.650516	2.83171	0.486458	1.54012	0.862493	0.162234	4.21133	2.0535	0	0	0.792299	1.97109	0.207479	0.724701	3.36545	3.0765	0.254898	2.05004	0.692591	3.99119	5.12443	5.29712	3.57743	3.95694	5.89287	3.30233	3.69321
0.0514856	0.019681	0.10665	0.330809	0.318718	0.35344	2.53137	0.22363	0.783115	0.275267	0.10704	4.05769	3.0321	0	0	0.728002	1.4481	0.296539	0.293309	3.09478	2.6834	0.191216	1.10375	-0.323506	6.42035	6.3905	6.70118	3.93083	6.75169	5.0771	2.04945	6.90467
0.0518262	0.0222702	0.0613596	0.0662203	0.0658016	0.302049	2.10846	0.0762255	0.744421	0.106246	0.0548728	3.42184	0.716511	0	0	1.49528	1.60081	0.397685	0.13392	2.4437	2.14225	0.0314396	0.0181589	0.487278	2.40808	3.6972	5.83523	3.32846	2.54463	3.63952	1.44051	3.04805
0.03612	0.0351259	0.0647328	0.327849	0.402303	0.541965	3.14969	0.272304	0.978265	1.22724	0.225159	4.80309	2.18114	0	0	0.710235	1.77113	0.28156	0.284895	2.94259	2.83047	0.15664	0.684411	-0.102737	4.89778	5.08725	5.8547	2.77056	4.93509	4.04265	1.92828	5.90684
0.0234106	0.0781489	0.0550102	0.0840963	0.317644	0.345773	1.84135	0.122976	0.669533	0.742539	0.0850005	4.29259	1.8849	0.014704	0.0191926	0.512453	1.00173	0.256633	0.222525	2.50499	2.46276	0.128173	0.205345	0.0991237	3.45615	4.00911	4.17086	2.54332	3.57312	3.52311	1.10076	4.94783
0.0394901	0.0819545	0.0991765	0.143691	0.477677	0.536091	2.1134	0.248754	0.612344	1.57177	0.0476988	4.89267	1.77934	0	0	0.852015	1.18165	0.4202	0.250685	2.7449	3.04989	0.117163	0.350013	-0.255271	4.8153	4.8722	5.78627	3.04219	5.85581	3.80663	1.02077	6.14231
0.0923378	0.234361	0.119307	0.248903	1.22978	0.953452	3.78184	0.577393	2.25828	1.92963	0.328261	3.9973	2.4089	0	0.00915461	0.518133	2.32358	0.740638	0.696341	4.50396	3.56072	0.500654	0.126387	1.55991	3.42672	5.10399	4.92095	4.31238	5.0587	7.8285	5.63491	3.069
0	0.00846516	0.091863	0.0956351	0.232379	0.188661	1.02788	0.32948	0.413291	0.966465	0.136181	4.77736	1.11169	0	0	0.312727	0.766033	0.10036	0.126963	1.57959	2.05762	0.142197	0.0904289	-0.327068	3.12761	3.25724	4.32869	1.99034	3.92353	2.28287	0.716149	4.77442
0.0363167	0.12766	0.140499	0.219857	0.949729	0.941194	3.03209	0.718412	1.67688	1.93564	0.230111	4.17072	1.99465	0	0	0.948889	2.12299	0.711133	0.608126	3.20885	3.48805	0.403701	1.15173	0.465527	4.04994	4.67158	4.56459	3.48834	5.47467	5.23478	2.18238	3.85326
0.0432172	0.0895669	0.180178	0.164961	0.360396	0.635259	1.82478	0.228776	0.73603	1.02386	0.0521867	4.03078	2.11316	0	0.0203777	0.597027	1.15323	0.525503	0.308896	2.08414	2.93263	0.432838	0.261324	-0.264911	3.80282	4.13729	4.60432	2.52416	4.87208	4.12737	1.21665	6.3636
0.135599	0.101507	0.0700689	0.210649	0.712387	0.823865	2.49539	0.617195	1.19791	1.35254	0.113361	4.05565	2.61304	0.060641	0.0201008	0.724698	1.40808	0.440353	0.503664	2.96699	2.71135	0.56348	1.21633	0.221114	2.97272	5.19363	6.06138	3.10998	4.99537	5.12147	1.73354	6.16909
0.0374507	0.0937101	0.187571	0.490842	0.702615	0.883186	2.64514	0.733948	1.01824	1.67716	0.290417	4.40058	2.12526	0	0	1.1462	1.98984	0.611778	0.493625	3.03534	2.738	0.248325	1.95018	-0.0757143	4.17955	4.56884	7.64065	3.20834	4.75309	3.55496	1.16561	6.81834
0.0521517	0.0356932	0.0817514	0.0906206	0.201994	0.241413	1.67508	0.250102	0.491334	1.1937	0.0333832	4.76034	1.87506	0.0263614	0.00866866	0.599467	0.739754	0.205796	0.160238	1.80642	2.17643	0.105704	0.0647318	-0.623347	5.06859	3.9781	5.36625	2.58358	5.8476	3.49472	0.883206	5.54269
0.0958609	0.128959	0.244871	0.203195	0.603047	0.731126	2.7553	0.638879	0.912449	1.86096	0.0816874	4.38106	2.13035	0	0.0320963	0.814613	1.48793	0.487478	0.27151	2.85263	2.82119	0.261395	1.57044	-0.0715129	4.43905	4.81279	5.93405	3.16435	6.40109	4.90156	1.89353	6.20685
0.0599289	0.121933	0.0683512	0.308732	0.759302	0.786868	3.02421	0.409867	1.45291	1.40337	0.153661	3.90345	1.64665	0	0.0166016	0.812731	2.05357	0.492224	0.379391	2.98891	2.59689	0.302854	0.584381	0.114863	4.18945	3.99108	5.2018	2.90408	3.263	4.68194	1.35307	7.34494
0.0498753	0.0838492	0.181053	0.226953	0.419529	0.574252	1.97634	0.644803	0.650724	1.97815	0.0424009	4.58888	2.17575	0	0.024713	0.645861	1.2135	0.620321	0.370845	2.56767	2.58281	0.167992	0.941785	0.126172	4.37471	4.10413	4.64259	2.9904	4.84421	4.35131	1.35535	2.94252
0.102925	0.0631309	0.136066	0.358593	0.835907	0.647842	2.32221	0.878564	0.968195	1.17724	0.235921	3.77644	2.1272	0	0.0231034	1.76607	1.91913	0.574256	0.305669	2.78767	2.8225	0.388275	0.332849	0.453012	4.31099	4.62907	4.67268	3.89305	3.958	4.49808	2.22966	2.84195
0.146452	0.996949	0.477583	1.02111	1.71816	2.76213	4.37191	2.18767	2.30382	3.41716	0.271182	4.46502	2.89808	0	0.0748341	2.02127	3.08738	2.54074	1.62852	3.85306	3.05954	1.95534	1.84786	0.400146	5.29397	4.64532	6.87502	3.82259	5.17263	5.48551	2.53195	5.90532
0.0206608	0.0464468	0.0644567	0.0695569	0.135075	0.175626	1.91792	0.155895	0.6135	0.705383	0.0717083	3.70142	1.78033	0	0	0.244536	1.01662	0.0672008	0.367176	3.01195	3.85621	0.069904	0.163345	0.652326	3.04108	3.99525	5.49074	3.61654	4.44049	5.40004	3.56803	5.16501
0.223964	0.584945	0.132316	0.086264	0.591772	1.24474	3.29702	1.27002	1.6842	1.3234	0.236338	3.54255	1.52124	0.0250671	0	1.37503	2.61581	1.21319	0.862984	4.40767	3.43297	0.86687	0.843832	1.64445	3.49642	4.9794	5.39189	4.7363	2.17899	7.81464	4.40905	2.69918
0.021155	0.063055	0.0296952	0.0612345	0.164294	0.215664	1.63982	0.244926	0.833125	1.89622	0.0876339	3.93411	1.3319	0	0	0.455827	1.03663	0.134434	0.177529	3.56162	3.37848	0.117347	0.0672857	1.35164	3.12604	4.23676	2.54494	3.96486	2.25835	5.99637	3.26222	1.58581
0.0524798	0.917119	0.0707922	0.36444	0.55046	1.43209	3.50489	1.10527	1.81799	1.56549	0.109067	4.30352	1.78208	0	0	0.620432	2.43297	1.54643	0.846027	3.84021	3.19141	1.32879	0.73099	1.03427	3.71467	5.66448	6.8675	4.08873	4.41097	6.62091	3.61671	1.51412
0.0354978	0.178676	0.0497293	0.234749	0.204836	0.462211	2.64351	0.977425	1.26599	0.987138	0.167631	5.12684	1.36725	0.0149254	0	1.0303	2.53717	0.626198	0.620433	3.4963	2.44389	0.4618	0.179221	0.574523	2.48371	5.13744	5.709	4.22582	5.61702	4.99613	1.71987	7.21904
0	0.0604114	0.0213797	0.247027	0.170022	0.249304	1.97775	0.176965	1.09607	0.522382	0.0426059	4.55905	1.16404	0.0169316	0.0110898	0.545106	2.00321	0.356643	0.370119	3.7813	2.48611	0.125445	0.666819	0.931893	2.3683	5.17455	5.05032	4.17002	3.77627	5.62454	2.22534	6.39927
0.0123919	0.0822971	0.038894	0.368698	0.271324	0.229747	2.51039	0.405088	1.4517	3.27491	0.0770504	3.98335	1.13314	0	0	0.518041	2.10579	0.309804	0.233743	2.95365	2.12387	0.221906	0.467151	0.700715	1.77221	3.7898	4.23354	3.81681	1.90496	3.27264	1.41882	6.98843
0.0394925	0.0520284	0.108549	0.513656	0.467183	0.443765	2.92891	0.449882	1.55953	0.720941	0.0555008	4.56505	1.63555	0	0	1.48663	2.73584	0.411719	0.55329	3.82304	2.49468	0.189159	2.39174	0.437951	4.43511	6.04679	7.68313	4.34591	5.31674	4.55053	1.58688	4.48685
0	0.0614937	0.0943284	0.201964	0.204643	0.320025	1.84701	0.354383	0.645496	0.620643	0.0386185	4.68636	1.02876	0.0455221	0.0200139	0.966491	1.59415	0.411424	0.145206	2.98182	2.29418	0.179068	0.836686	-0.0132832	3.56064	5.16579	7.1529	3.54563	5.27413	3.40755	1.05225	6.86086
0.0596404	0.119241	0.0933549	0.333605	0.49493	0.475145	3.50744	1.03101	1.79893	0.905907	0.577324	4.97944	1.52336	0	0	2.01029	3.01546	0.817041	0.635737	4.45751	2.7215	0.545036	0.987095	0.624189	4.1291	6.46004	8.31947	5.117	6.27017	6.17588	2.52078	8.4355
0.0431296	0.0488191	0.0823559	0.307466	0.605402	0.305157	2.01379	0.411547	0.777026	0.560459	0.0753376	4.43288	1.1938	0	0	2.13535	2.76889	0.47637	0.302341	3.63409	2.38757	0.218646	3.23161	0.488961	3.20939	5.50165	8.19447	4.6469	5.85763	5.35091	1.57811	6.25995
0.0141485	0.0475836	0.10144	0.239761	0.170873	0.306454	1.75472	0.0686433	0.453485	0.861826	0.0298293	4.93163	0.909266	0	0.0230928	0.888992	1.14492	0.629776	0.0856349	2.60994	2.10727	0.157474	0.874003	-0.101568	3.43407	4.6133	6.77071	3.29139	5.2577	3.13446	0.929311	6.22247
0.111494	0.0381575	0.117479	0.187422	0.605016	0.419053	3.06943	0.33541	1.54712	1.66701	0.287369	3.96994	2.08157	0	0	1.50343	1.9912	0.459399	0.665896	4.43258	3.30164	0.272889	2.00415	0.976219	4.78045	5.92511	7.33065	4.79977	5.0872	6.26275	2.69465	2.67526
0.062123	0.0153459	0.0882149	0.0840155	0.230485	0.144316	1.59019	0.0700174	0.501535	0.303796	0.0472761	4.27512	1.33593	0.0225378	0	0.555852	0.738838	0.161491	0.257044	2.29965	2.10316	0.0400176	0.0674864	-0.0794892	3.81029	4.73187	6.76492	3.0459	3.54287	3.94997	0.842478	4.20946
0.0861664	0.338286	0.109577	0.255265	0.671107	0.987036	2.61878	0.929228	1.23978	2.14213	0.212161	4.131	1.10929	0	0.0103467	1.169	2.01854	0.842754	0.538096	2.97238	3.37096	0.807776	0.65298	0.838044	2.83528	3.60635	4.37347	3.47142	3.23328	5.43925	1.98104	2.16005
0.0676789	0.292429	0.114248	0.255614	0.551608	0.80494	3.1894	0.560684	1.22041	1.03008	0.13988	4.32486	2.30729	0	0	1.08425	2.10278	0.777766	0.411391	3.64992	2.50741	0.651073	1.28119	0.411787	5.39362	5.83844	6.95195	4.4818	5.01089	5.16282	2.8189	4.98645
0.0911076	0.143706	0.207733	0.372936	0.706726	0.932975	2.94058	0.600004	1.01288	2.8527	0.186736	4.5235	2.40045	0.038736	0	1.05192	1.61959	0.591114	0.622316	3.62604	2.94289	0.430584	0.771745	0.323682	5.06712	5.42644	6.57571	3.87372	5.87027	5.8424	2.50195	5.4235
0.105597	0.712625	0.189444	0.385696	0.843573	1.40525	3.10836	1.28651	1.66102	2.35996	0.164444	4.28279	2.70388	0	0.0148709	1.71527	3.03852	0.680315	0.941119	4.04693	4.55498	1.15042	0.796052	0.978506	3.91417	5.37962	6.31853	4.94735	4.5474	5.20601	3.05823	4.46014
0.0780281	0.150954	0.0822682	0.297947	0.648228	0.769938	2.9868	1.01202	1.5916	2.86203	0.225705	3.69856	1.95458	0	0	1.02443	2.27228	0.720359	0.808418	3.58786	3.54628	0.691089	0.696585	1.18701	3.62212	4.79631	3.1003	4.64531	5.07134	7.16326	4.89934	4.33344
0.0165457	0.0372617	0.0962847	0.071468	0.605919	0.223885	1.83701	0.24185	0.739513	0.565151	0.113039	3.96827	2.61245	0	0	1.75893	1.80842	0.260963	0.400959	3.77936	3.78809	0.127815	0.47383	0.687189	5.87745	5.3528	6.40115	4.90788	4.62465	7.04339	3.7829	4.75275
0	0.0476948	0.0179463	0.198973	0.305613	0.266302	1.64735	0.0980664	0.435948	0.288081	0	3.10554	2.08815	0	0	1.50897	1.40987	0.578951	0.589199	3.12709	2.50424	0.13478	0.188497	-0.3468	6.3871	6.29829	8.62072	4.07353	5.79235	4.87793	1.21952	6.14057
0.0130472	0.213756	0.0476414	0.205802	0.581192	0.866358	3.00655	0.489828	1.31732	1.06903	0.254083	4.40589	2.57532	0.0163216	0	1.39321	2.47936	1.07598	0.696083	4.35581	3.57497	0.536325	3.03971	0.329833	5.87463	7.5033	8.42113	4.83057	5.97771	6.61403	2.59113	7.28835
0.0508987	0.267403	0.109084	0.178563	0.18414	0.813786	2.0099	0.537553	0.787947	1.28568	0.0538917	3.8699	2.37171	0	0	0.783633	1.09422	0.771604	0.295581	2.87135	3.43416	0.283548	0.368879	0.587402	4.16944	4.10349	5.27448	3.66937	3.46704	5.5305	3.44505	3.6499
0.0908135	0.081577	0.162406	0.183328	0.587458	0.847007	2.47421	0.697964	0.734114	0.913613	0.06142	4.283	2.58239	0.0245044	0.00805452	0.764745	0.96978	0.421285	0.914668	2.87509	2.90299	0.23167	1.0132	0.172707	5.2071	5.2597	6.2073	3.55962	4.58049	5.41556	2.14561	3.05639
0.00676046	0.103773	0.129919	0.096173	0.502935	0.442428	2.21409	0.333556	1.13145	0.971048	0.188268	4.27872	2.61712	0	0.0110521	0.599853	1.15512	0.427284	0.476528	2.91427	3.24844	0.224208	0.0552479	0.0404412	5.14326	6.04262	4.43995	3.49529	4.96944	5.2239	2.62147	6.34375
0.0126008	0.136839	0.0589161	0.191084	0.358452	0.477778	2.55602	1.30224	1.062	1.95678	0.301529	4.59374	0.526829	0	0.0103235	1.37563	2.35792	1.03751	0.179129	3.34667	1.71552	0.407189	1.74735	0.620819	2.39061	4.74592	6.17992	3.95815	4.60467	4.23808	1.34866	5.06381
0.02957	0.352911	0.0556925	0.355693	0.311449	0.725957	2.48677	0.823736	1.39992	2.92662	0.0619791	4.82623	0.952338	0	0	1.18812	2.15657	0.825516	0.363302	3.85733	2.01698	0.52798	0.600575	0.589741	3.03387	5.67681	7.07215	4.57101	6.10071	5.04797	1.40774	6.28185
0.0307142	0.159812	0.0324121	0.489771	0.352457	0.85687	3.21816	0.806552	1.49649	1.50443	0.196561	5.01172	1.74525	0	0.0201885	1.78431	2.79628	0.883657	0.482079	4.53722	2.35344	0.410168	2.45179	0.699014	3.72335	6.54399	7.95422	4.87859	6.27353	5.55048	2.68736	8.13461
0.022141	0.0659497	0.031075	0.259073	0.913781	0.506046	2.35282	0.827729	1.56301	0.727891	0.0311916	4.50031	0.595614	0	0.0121255	1.13909	2.41451	0.462911	0.242198	3.54029	1.79353	0.195975	0.941985	0.791201	1.89174	4.8762	5.85644	4.11254	3.86816	3.76187	1.26643	5.44877
0.0424915	0.0242496	0.0225894	0.268698	0.395352	0.253552	2.00471	0.56833	0.749248	0.84342	0.158552	4.48686	1.03182	0	0	1.4665	2.35202	0.396375	0.359115	3.15004	1.97342	0.154676	0.186521	-0.138993	4.28742	6.25388	7.92838	4.27907	6.38065	3.74993	1.33438	7.97491
0.0348748	0.213585	0.0367999	0.344059	0.307143	0.596365	2.68537	0.846788	1.19822	1.09792	0.0550578	4.93684	1.90676	0.0219369	0.0427075	1.92722	2.53007	1.01375	0.346107	3.6658	3.26145	0.432429	0.981432	0.354813	4.46983	7.13891	7.43625	5.16834	5.65479	4.73032	3.41343	8.33265
0	0.239807	0.0448374	0.361982	0.361542	0.542857	2.34605	1.29778	0.983748	1.09787	0.185624	4.91881	1.55549	0.0178938	0	1.71817	2.61152	0.750097	0.201854	3.74218	2.39126	0.552355	1.16944	0.326736	4.33091	6.04754	7.50703	4.49429	5.25405	4.57034	1.46825	6.53218
0.0568586	0.125893	0.0275695	0.248188	0.343192	0.467737	1.8622	0.917635	0.656284	1.58804	0.168573	4.3623	0.954297	0	0	1.46463	1.82355	0.666403	0.200401	3.21801	2.26352	0.410939	0.410378	0.32466	3.1969	4.97223	6.41461	3.86298	4.85877	4.12008	1.21848	6.14652
0.0712391	0.0805346	0.0883674	0.225076	0.930929	0.538108	2.31559	0.348279	1.11882	1.43513	0.184682	5.01025	2.16661	0.0165337	0.0108287	1.03428	1.35046	0.389924	0.343955	3.33873	3.12418	0.180207	0.18933	0.000485445	4.70182	4.93585	6.45326	3.2328	6.26631	3.93969	1.50891	6.08357
0.152056	1.38415	0.194137	0.901147	1.02246	2.57613	3.71732	1.95899	1.98649	2.48527	0.668168	4.45515	2.05819	0.0181428	0.0118848	2.32986	2.93499	2.95498	1.48104	4.47997	3.13093	2.1928	2.96911	0.744613	5.13102	6.41721	8.06108	4.47186	4.40903	5.78831	2.69911	4.49099
0.0866752	0.392682	0.251206	0.572814	0.962008	1.44818	3.45439	1.13177	1.65958	2.65989	0.597512	4.58552	2.77029	0	0	1.35622	2.5865	0.805751	0.621921	4.11322	3.68017	0.936973	2.18022	0.475045	4.62611	5.13542	5.33714	3.51595	5.45953	5.16371	2.40356	7.23354
0.0804481	0.0133428	0.049075	0.100493	0.298601	0.284036	1.87872	0.29495	0.706735	0.496529	0.0371002	4.34731	1.49113	0.0293045	0	0.552352	0.835535	0.572862	0.267048	2.45473	2.60569	0.135787	0.0403595	-0.325127	5.33833	5.20054	7.90976	3.2007	5.08179	4.99197	0.766177	3.65813
0.1327	0.257945	0.134209	0.1908	0.6541	0.731353	2.58723	0.849523	0.934717	2.48916	0.205609	4.03535	1.58276	0.0144338	0	1.10879	1.44378	0.609286	0.393037	3.68335	2.98787	0.494659	0.22944	1.06573	3.40705	4.82982	5.36992	4.24781	3.22378	6.9576	3.89936	4.87932
0.0191774	0.0918908	0.1727	0.27439	0.750965	0.710346	2.69255	1.10224	1.14692	1.23483	0.492196	3.82094	1.83222	0	0	1.0882	1.45315	0.77957	0.396519	3.0001	2.78373	0.409854	0.710529	0.268171	3.13477	5.59333	4.66256	3.80385	6.30935	4.40301	1.61823	5.86849
0.086741	0.127297	0.129692	0.220132	0.396438	0.386486	2.10569	0.24348	0.863674	0.72454	0.102848	4.39262	2.27578	0.0139283	0	1.03715	1.36589	0.225278	0.228562	3.397	2.7923	0.240375	0.147044	-0.0248955	5.96438	5.75427	6.64427	3.88495	5.54811	4.73769	1.52154	5.64376
0.0691672	0.0781996	0.0847436	0.140266	0.749228	0.269624	1.96163	0.422196	0.787671	0.830914	0.0968072	3.85787	2.35016	0	0	1.19983	1.19242	0.206931	0.571574	2.82023	3.89073	0.190128	0.048256	-0.370927	5.60039	6.24562	6.4613	3.51508	6.66614	4.8555	2.40456	7.70303
0.0991526	0.105203	0.154042	0.312032	0.388045	0.68555	2.16995	0.560617	0.908672	1.45316	0.283084	4.37964	1.64608	0.0159792	0.0414115	1.84023	1.29779	0.445298	0.259525	3.43296	3.02841	0.354504	0.87303	0.557904	3.95516	5.00355	5.38978	3.77653	4.14446	5.08193	2.20146	4.8651
0.100981	0.0662457	0.0916924	0.165568	0.172311	0.350618	1.70654	0.616002	0.738014	0.683434	0.135932	4.68566	1.28058	0	0.012181	1.19737	1.11801	0.305972	0.330084	2.72386	2.04113	0.361996	0.4798	0.0931263	3.93537	4.77882	6.06908	2.96542	4.21091	3.4165	1.02044	3.27342
0.100296	0.113236	0.0405513	0.481527	0.576683	0.440317	2.95836	1.34965	1.32639	0.832729	0.571873	4.33419	2.80953	0	0	1.42182	1.88916	0.430886	0.540737	3.73526	3.1914	0.673299	1.01591	0.202706	5.9596	5.88427	7.06621	4.2986	5.40152	4.4005	2.14155	5.32669
0.0294549	0.0873043	0.0764891	0.111999	1.36091	0.322117	2.14209	0.39261	0.66661	1.02142	0.0817473	3.69243	1.42658	0	0.0161495	0.562077	1.31373	0.43783	0.227319	3.03454	3.99638	0.253006	0.7736	0.822994	2.81271	3.42832	3.33952	3.19321	2.10103	4.94262	2.12273	4.13243
0.0929541	0.097731	0.0498206	0.134448	0.37943	0.546049	2.08762	0.565113	0.572699	0.788574	0.0709181	3.74815	2.80861	0	0	1.24072	1.13291	0.39083	0.532751	2.75082	2.8475	0.365102	0.0282219	-0.219878	4.16704	5.32929	6.75841	3.22384	7.11606	3.91611	0.833567	5.0101
0.0336481	0.198113	0.145214	0.176156	0.495135	0.663422	3.05298	0.861357	1.37107	1.8365	0.0874997	3.41164	1.86549	0	0.0276031	1.21372	2.10824	1.13323	0.535795	4.49409	2.87707	0.619231	0.788503	1.16636	3.91437	4.38147	5.28341	4.10025	4.82009	6.66884	2.94071	4.17931
0.0395752	0.171424	0.102208	0.327804	0.737327	0.990307	3.42876	1.01264	1.95664	1.98517	0.421144	4.2606	2.79659	0.120453	0.0163301	1.82274	2.55396	1.38597	1.07684	4.70407	3.56258	0.568918	1.83262	0.984218	5.86073	5.29984	7.30809	5.00454	5.05825	7.34838	3.63307	4.71705
0.0142589	0.569879	0.00754558	0.0208786	0.366178	0.0958095	1.37	0.173372	0.421582	0.461269	0.0448595	4.72768	0.78961	0	0	0.210042	0.577229	0.122544	0.121743	1.50878	3.23928	0.0437205	0.177224	0.0969597	1.46342	3.03583	2.43186	2.24921	2.10243	3.91999	1.32418	7.11694
0.0422557	1.97802	0.0445819	0.199516	0.485896	0.79885	3.15569	4.54756	1.86158	2.72472	0.187279	4.25765	1.5239	0	0	1.60362	2.75288	2.3447	0.938787	5.1896	3.71893	0.548352	1.00922	1.95529	3.27811	6.20419	4.12913	6.44898	5.34003	7.24377	5.54959	5.31933
0.0665124	0.045593	0.0214029	0.115159	0.305651	0.318702	3.16626	1.19396	1.42494	0.4154	0.189065	4.36109	2.41079	0.033703	0.0221189	1.25812	2.01925	0.377919	0.212802	4.61533	3.16083	0.18449	0.808675	1.15759	4.942	6.34931	6.32314	5.58417	4.73921	7.17992	3.74131	5.04717
0.145256	0.180768	0.103754	0.261403	0.600809	0.915675	3.25344	0.80315	1.69505	1.66523	0.232227	4.23273	1.93013	0.0211104	0	2.05836	2.39922	0.663218	0.595731	4.55619	3.33833	0.473945	0.847085	1.20782	4.09399	5.24024	5.59753	5.18336	7.33522	7.9816	5.48504	6.98498
0.033226	0.153545	0.0436948	0.152021	0.335229	0.505489	3.55146	0.523813	1.38838	0.520413	0.0524718	3.78068	2.55995	0.0208953	0.0136924	1.16264	2.10562	0.326714	0.423062	4.26809	2.74311	0.287499	1.00612	1.09072	5.19823	5.96507	5.79901	5.05908	4.8279	7.89192	3.79781	3.24034
0.0496253	0.0162686	0.0523498	0.102151	0.396575	0.310472	1.50148	0.330087	0.602176	0.149625	0.0889386	3.47654	2.10623	0	0	2.33937	0.977113	0.342253	0.180091	2.59686	2.43987	0.128191	0	0.0453337	2.36021	4.61163	3.65545	2.88773	6.71314	4.76313	1.03235	7.45021
0.0420198	0.0318838	0.122233	0.185679	1.14184	0.272497	2.01696	0.325729	1.30531	0.484406	0.0734199	3.96567	4.28775	0.0351672	0	0.48413	1.57568	0.245651	0.656612	3.97642	3.25448	0.166162	1.05048	0.754571	3.74208	5.52923	4.77031	4.16292	4.70745	6.20517	2.41926	6.84582
0.125182	0.269766	0.173277	0.558763	0.786383	1.00031	3.14168	0.51428	1.33077	1.37094	0.118227	4.29349	2.43183	0.0180839	0	1.47645	2.79998	0.773296	0.478032	3.84743	3.23282	0.473281	3.3437	0.49143	5.21815	6.20105	7.32843	4.21542	5.0341	4.83376	2.68404	3.57518
0.0674557	0.0855269	0.0797856	0.109738	0.597416	0.610555	1.27632	0.4633	0.707652	1.00011	0.13943	4.85486	1.27916	0	0	0.4449	0.833125	0.53702	0.33937	2.44557	2.81881	0.130582	0.621742	-0.378078	4.28625	3.83056	4.92415	2.35653	5.40662	3.1959	0.719938	7.26218
0.137905	0.015547	0.118678	0.153366	1.11774	0.330228	2.31092	0.294817	0.885694	0.928136	0.1784	3.79436	2.84312	0	0	1.11539	1.51484	0.413145	0.600815	3.47335	3.57898	0.140034	0.368624	0.0652342	6.20837	5.95627	5.98908	4.28593	5.4402	5.27524	2.30409	6.84236
0.0351254	0.30754	0.142864	0.356509	0.538841	1.0382	3.31945	0.999481	1.33805	2.68055	0.0912679	3.73152	2.3443	0	0	0.910121	1.86771	0.947697	0.764796	4.36985	3.30428	0.625657	0.279022	1.08733	4.82362	5.95486	6.9101	4.61402	4.85155	7.58545	3.15177	1.74742
0.0250379	0.063053	0.0966928	0.157843	0.501258	0.525578	2.32114	0.391353	1.01285	0.35134	0.199678	4.2505	1.44106	0	0.0103009	0.86606	1.58691	0.475743	0.236912	3.1465	3.00549	0.206211	2.57216	0.202259	4.47091	4.79852	5.5264	3.75913	4.19303	3.92832	1.88731	6.72001
0.165273	0.00733708	0.0537711	0.00948721	0.254253	0.135063	0.852056	0.257746	0.408216	1.26927	0.0406665	4.10107	1.16787	0	0	1.32126	0.620786	0.192403	0.067393	2.55826	2.6431	0.0482939	0.177306	0.821247	2.03066	2.48441	3.25833	3.21976	2.32982	5.08166	1.9817	3.81742
0.0743054	0.0675782	0.108534	0.18856	0.416273	0.562598	2.26274	0.346865	0.779541	0.450995	0.0786378	4.52769	2.1197	0	0.0124307	0.786752	1.80962	0.577939	0.459251	3.52602	2.86304	0.20516	2.52762	0.384966	4.44414	5.26032	6.38105	4.0448	4.07785	4.24259	1.81784	5.86073
0.067501	0.0837363	0.078112	0.180871	0.275283	0.412661	2.07615	0.443611	1.17077	1.15821	0.254503	4.09052	1.93138	0.0172063	0	1.11321	1.75386	0.382968	0.317627	2.78635	2.81365	0.303477	0.0563208	-0.0788343	4.42854	5.42826	5.35755	3.83822	5.84111	4.84584	1.08678	6.8821
0.0348833	0.0459793	0.0488727	0.100086	0.410242	0.173302	1.31664	0.164804	0.712331	0.568051	0.0729707	4.4355	1.55856	0	0	0.459403	0.801007	0.294586	0.100733	2.72915	3.11719	0.210695	0.0869909	0.196769	2.89565	4.10664	4.75911	2.6614	4.60546	3.14349	1.22619	4.79072
0.0727004	0.0894252	0.175033	0.229453	0.677588	0.523705	2.89692	0.234579	1.05466	0.620753	0.0837371	3.92424	3.18217	0	0.0110556	0.868025	2.03426	0.41737	0.854413	3.72766	3.24141	0.386555	2.23366	-0.0101834	6.24999	6.65401	7.65116	4.21183	6.31254	6.10328	2.22087	6.9351
0.0800648	1.52777	0.283235	1.07417	1.26877	3.07182	3.37168	3.76029	3.13849	4.48281	0.269807	4.70613	1.1277	0.174589	0.0658691	4.27038	3.93313	3.24108	1.34934	3.65046	3.33435	3.59336	0.801608	1.27876	1.80109	4.01551	6.45243	4.01269	2.29605	5.21674	3.58008	3.77282
0.0922193	0.0577418	0.00911247	0.0982246	0.800016	0.325701	2.15178	0.361595	1.5806	1.39822	0.267272	3.82868	1.68303	0	0	0.446013	1.91279	0.236993	0.445438	3.37021	3.18223	0.235885	0.654022	0.668716	3.32978	3.4664	3.47448	3.91202	6.02036	6.62368	4.5725	9.92387
0.0603428	0.0586954	0.0547212	0.0507752	0.161353	0.299712	1.63738	0.532604	0.550002	0.674719	0.191922	4.52207	1.25938	0.0434396	0.0143416	1.378	1.18375	0.407925	0.0907316	2.61545	2.17681	0.299864	0.354936	0.159259	3.443	3.73579	5.39465	3.48909	4.18281	4.16109	1.89675	7.24684
0.0605263	0.0174212	0.0481401	0.332723	0.684182	0.538138	3.04213	0.338932	1.5482	0.874413	0.169779	4.12715	3.42749	0	0.0125955	1.13605	1.87057	0.584265	0.382783	3.80703	3.28264	0.335447	1.96923	0.525091	5.5145	5.41318	6.32558	4.00038	4.638	6.10492	2.49772	3.91132
0.0435385	0.081224	0.119383	0.173004	0.75085	0.748476	2.88048	0.655975	1.83457	0.710956	0.176191	3.90278	2.03899	0	0	1.31344	1.92851	0.313919	0.716149	3.38624	3.61618	0.333569	0.319121	0.406254	3.10786	4.40154	6.11129	3.51149	7.56977	5.99994	3.18001	7.19579
0.0811006	0.105239	0.135707	0.435645	0.640094	0.83979	3.16675	0.603171	1.43628	1.87389	0.451787	4.62857	1.589	0.0159847	0	1.20542	2.16543	0.843197	0.429739	3.01108	2.93994	0.62478	2.19528	0.358491	4.12429	4.67531	5.0648	3.59716	4.09984	4.3594	1.97564	4.61625
0.0208024	0.0620188	0.106586	0.155336	0.495831	0.393461	2.23279	0.169252	0.947485	1.03703	0.0147301	4.22673	2.96904	0.0173891	0.0113901	0.688045	1.42433	0.230006	0.228557	2.64754	3.01484	0.180537	0.445859	-0.126143	3.84707	2.97929	3.58739	2.7704	7.05731	4.29596	1.73515	8.79652
0.0591377	0.0504564	0.0623734	0.0328465	0.316812	0.269669	1.82967	0.499569	1.05926	1.56743	0.151695	4.09422	1.46778	0	0.0123018	0.749966	1.64976	0.49015	0.199587	2.89025	2.31611	0.175837	0.407113	0.854634	2.26455	3.01812	2.15951	3.27632	2.80298	5.18945	2.20691	5.18826
0.0950034	0.114163	0.0475954	0.101998	0.245216	0.734431	1.91755	0.50775	0.637111	0.916009	0.0677725	4.0836	1.84401	0	0.0318029	0.418152	0.865914	0.508964	0.348847	2.81332	2.2156	0.459285	0.0707833	0.44281	2.70262	4.2594	5.93909	2.37632	3.67011	4.17429	1.0335	1.02215
0.0370426	0.176055	0.0390857	0.33292	0.455915	0.800671	2.69863	0.684366	1.19177	1.91417	0.136506	4.47263	1.68382	0	0.036397	1.51741	2.37074	0.809958	0.583041	3.24188	2.76351	0.456705	0.443892	-0.508245	4.8867	6.87506	9.53694	3.97371	8.53722	4.94562	0.773304	8.51757
0.0368175	0.095458	0.0260147	0.130719	0.286715	0.315598	1.55201	0.56282	0.672267	2.18081	0.113955	4.85695	0.863648	0	0	0.855824	0.870472	0.547369	0.166338	2.50034	1.94009	0.257894	0.0917238	0.145965	2.93629	5.06231	7.13228	3.21548	4.28667	3.91833	0.681933	2.66451
0.0350795	0.0935562	0.0802161	0.274427	0.567889	0.606918	2.56675	0.244871	1.12264	1.53234	0.156767	4.4598	2.5216	0	0.011581	0.845582	1.55749	0.337566	0.468857	3.15452	3.31311	0.25068	0.640756	0.232013	4.1232	4.74062	5.54908	3.53174	4.26263	4.95788	1.88149	7.0915
0.0145347	0.126805	0.104124	0.17161	0.400963	0.7934	2.69626	0.433459	1.09278	1.713	0.367114	4.65952	2.03322	0.053867	0.0237211	0.760982	1.84824	0.724839	0.433029	3.58744	2.87638	0.362651	0.981711	0.629347	4.81514	5.00975	5.96429	4.1536	5.66409	6.29839	3.35549	3.88973
0.0496257	0.0804288	0.0351104	0.0722588	0.177567	0.0638816	1.76389	0.0861399	1.16265	0.545952	0.0582672	3.43748	2.77461	0	0	0.418048	1.89393	0.0863772	0.237864	3.00618	2.59306	0.0789007	0.832702	0.732961	2.27155	3.33453	4.76834	3.29748	5.79887	4.91456	1.82835	2.10473
0.0263221	0.0149857	0.0208847	0.0479269	0.207951	0.151261	1.27954	0.0516044	0.704127	0.419396	0	3.61255	1.79752	0	0	0.534479	1.1698	0.149989	0.113181	2.06866	2.58634	0.0626229	0.0977981	-0.152392	2.76973	3.77547	2.66832	2.72608	7.21717	4.64243	1.06295	7.18196
0.0820087	0.0270886	0.0500375	0.0435657	0.273759	0.196522	1.86896	0.103489	0.78493	0.58973	0.0253305	3.88359	0.918412	0.015019	0.00983486	1.14747	1.06025	0.158354	0.171107	2.59637	2.57668	0.0569506	0.180284	1.42893	2.57774	2.65673	3.221	6.0433	2.05303	5.69145	2.86326	1.34027
0.0629641	0.0478592	0.029891	0.267458	0.301849	0.428964	2.24496	0.371951	1.06913	0.671486	0.0882	4.12692	2.22829	0.0699237	0.0232277	1.73962	1.77501	0.457947	0.178641	3.90307	2.61779	0.145059	0.30269	1.00423	2.86205	4.29166	4.76517	4.09649	6.75194	5.85003	2.61129	3.52235
0.024425	0.061529	0.069811	0.0876616	0.31497	0.216019	1.64134	0.256017	0.565516	0.921916	0.0638382	4.04008	1.03927	0.0305248	0	0.742886	0.927599	0.491996	0.0640653	2.23541	2.21908	0.179167	0.386774	0.727789	0.991522	2.53066	2.12825	3.17155	1.52642	2.94361	0.781617	4.50844
0.18325	0.422894	0.128647	0.464943	0.88556	1.78527	3.63881	1.48813	1.79888	2.57334	0.169706	4.21791	2.68618	0	0.0138427	1.7585	2.85422	1.68144	1.19824	4.26375	2.85266	1.16639	2.22614	0.654417	3.57698	5.85875	7.42094	4.04932	5.05503	5.21803	2.20322	6.8133
0.0399775	0.173089	0.0317501	0.270451	0.202343	0.63893	2.36173	0.725069	1.1016	1.55231	0.103602	4.59442	0.265856	0	0	1.7898	2.50599	0.5998	0.231869	2.93533	1.67573	0.284042	0.232839	0.588606	1.61142	3.81834	6.06565	3.10079	3.96168	4.13702	1.12346	3.99302
0.0189833	0.0215112	0.0592955	0.196345	0.148158	0.288872	1.66318	0.177578	0.636715	1.24028	0.078821	4.4859	0.673103	0	0	0.803306	1.06922	0.306191	0.160164	3.42405	1.77323	0.10769	0.39166	1.06229	2.03929	4.19843	4.15125	3.34505	2.8169	4.03675	2.19299	2.30246
0.0467247	0.0463749	0.0851876	0.0927845	0.154965	0.361153	1.75047	0.305684	0.809728	0.551468	0.0494765	4.58301	1.56821	0	0	0.928492	1.47269	0.510336	0.187268	3.21662	2.56454	0.176699	0.0954458	0.749392	2.3417	4.54701	5.60765	4.13165	4.9637	5.4792	2.25819	4.92469
0.0620119	0.165771	0.107411	0.479142	0.38277	1.1307	3.31929	0.558703	1.42131	0.88035	0.114712	4.64105	1.20031	0.0175278	0	1.78966	3.39386	1.12491	0.569991	4.17137	2.03261	0.676243	1.7423	0.823728	3.16138	5.59652	6.4637	4.79	3.63455	5.53009	1.86098	8.34027
0.0677385	0.047611	0.0714332	0.231023	0.376488	0.464065	2.4938	0.150179	0.895336	0.835547	0.0445415	4.244	3.44352	0.0133013	0	1.08149	1.77076	0.312712	0.282561	3.98852	2.90772	0.0820877	1.93254	0.595176	4.97983	5.21776	6.59532	4.07631	4.14051	6.20261	2.80414	6.28859
0.0858572	0.288392	0.082512	0.354065	0.618082	1.25539	3.51958	1.43182	1.97936	2.78486	0.19131	4.44029	1.87727	0.0200044	0.0131073	1.55338	2.79567	1.33041	0.588837	4.68338	2.57668	0.843448	1.62519	0.963193	4.15799	5.70325	6.98844	4.55195	4.73839	6.21178	2.30309	5.60525
0.252712	0.206393	0.171645	0.396257	0.545985	0.981996	3.25526	0.733465	1.61233	2.54498	0.204373	4.07857	2.22874	0.0143412	0.0187198	1.72415	2.53966	0.714378	0.698012	4.38113	3.05375	0.544501	0.333039	0.9586	4.18535	5.62723	6.39844	4.4539	4.44589	6.54423	2.9874	5.42997
0.0705536	0.172238	0.0688092	0.307597	0.296589	0.86776	2.84889	0.720843	1.17497	1.45678	0.187685	4.25043	1.44914	0.013865	0.0180991	1.13454	1.70507	0.886591	0.502792	3.69119	2.76024	0.636622	0.545254	1.26094	3.01663	4.40306	5.08763	4.46229	2.8835	5.88101	3.73298	3.25688
0.1206	0.707402	0.192441	0.321372	0.935203	1.62044	3.80903	1.4909	2.02179	2.00965	0.342544	3.99189	2.70865	0.0616752	0.0102605	1.68127	2.69452	2.02792	0.832377	4.83018	3.52408	1.4592	1.41829	1.07648	5.04677	6.15991	7.32896	4.8231	4.4016	6.50202	3.75226	4.90184
0.025538	0.0851062	0.0180242	0.199785	0.219164	0.298187	1.94281	0.54517	0.974229	0.77557	0.105298	4.9364	2.03658	0	0	0.543402	1.21909	0.305856	0.325739	3.24485	2.95437	0.182992	0.0235994	0.195606	4.71075	5.40166	4.82283	3.75281	5.66402	5.31407	2.64794	7.27339
0.0736907	0.224538	0.151431	0.140842	0.439994	0.580879	2.20866	0.400084	0.854956	1.24154	0.0524577	4.43724	1.77377	0.0156955	0.0204847	0.639001	1.48595	0.57892	0.283085	3.34823	2.43329	0.224476	0.817392	0.400758	3.7939	4.28037	5.82753	3.59477	4.45345	4.8887	1.88949	6.44935
0.12384	0.146664	0.188366	0.515259	0.567061	0.615504	3.50693	0.366518	1.28401	1.26374	0.150561	3.97529	4.50593	0	0.0438966	0.626388	2.27987	0.292265	0.554213	4.16065	3.01296	0.340608	0.866596	0.705242	5.16611	4.522	5.3482	4.0931	4.62342	6.10795	2.32316	5.61589
0.0774631	0.133981	0.125126	0.112307	0.19394	0.695948	2.58834	0.447487	1.00961	2.60105	0.0370092	4.2102	1.59852	0	0	1.00656	1.43059	0.759515	0.346711	2.67738	1.97549	0.310912	0.484421	0.541863	3.67934	4.64348	4.11514	3.4021	2.60544	5.09835	2.50185	3.36559
0.0863061	0.106048	0.0585576	0.308628	1.26393	0.703155	2.8388	0.79209	2.14682	0.88215	0.501629	4.34785	3.40295	0	0.126653	1.08588	2.89376	1.21587	1.0587	4.48321	3.41208	0.44642	2.10673	1.00067	3.26631	5.54197	5.85081	4.17654	4.35323	6.06126	3.31023	7.67436
0.0434922	0.313804	0.0958198	0.116657	0.280679	0.253496	1.88144	0.446992	0.740269	2.49284	0.144604	3.45152	1.41876	0	0	0.829329	1.14402	0.3398	0.192114	2.64415	2.22861	0.178464	0.186225	0.723998	2.87291	3.57684	3.64789	3.6193	2.69349	5.42479	2.78772	4.53329
0.0659985	0.366299	0.0390808	0.106122	0.609335	0.917946	2.41787	1.0132	1.77127	1.28162	0.287478	4.26049	1.71005	0.176673	0.048322	1.15998	2.24264	0.818343	0.210088	3.88884	2.85071	0.666463	0.931881	0.644601	3.65411	5.08666	6.36856	4.18983	5.7246	5.87499	2.33628	6.33424
0.108899	0.254192	0.10861	0.132104	0.386005	0.725054	3.26438	0.8763	1.38848	1.08035	0.288778	3.97902	2.82814	0	0.0102522	0.643194	2.07571	0.626943	0.430303	4.50921	2.95598	0.384987	1.0856	1.06538	4.60683	5.56456	5.51096	4.31245	4.58483	7.3697	3.85815	5.36426
0.0754204	0.104222	0.0795227	0.180522	0.490075	0.497301	1.60877	0.753492	0.699032	1.88825	0.200092	3.34604	1.68742	0	0	1.23843	1.20519	0.452566	0.312125	2.33385	2.76005	0.322029	0.520657	0.974354	2.11973	2.28923	1.63399	2.97855	1.4154	4.7691	1.92522	1.09447
0.0582851	0.0766298	0.0207841	0.0429988	0.388013	0.130935	1.43315	0.0948449	0.510089	0.510032	0.0617033	4.24706	1.47582	0	0	0.490972	0.939361	0.113397	0.181427	2.23038	2.82092	0.0469949	0.080123	0.487764	4.47509	3.54981	2.74295	3.53448	3.94616	5.34446	3.55964	2.39845
0.0660327	0.0419574	0.0391012	0.126506	0.537518	0.631415	2.46903	0.47623	1.27991	0.655745	0.150963	3.72995	2.78043	0	0	0.824651	1.53498	0.498615	0.538114	4.0109	3.15435	0.434092	0.466798	0.607585	5.22273	6.10626	5.95524	4.2943	4.95406	6.59988	2.7645	5.21937
0.0322115	0.328924	0.0996615	0.287958	0.460912	0.619857	2.13554	0.874666	0.897442	2.22269	0.131885	4.47834	1.20845	0	0	0.963487	2.04084	0.63443	0.485738	3.26241	3.00072	0.715838	0.866783	0.672504	3.46829	4.63745	4.85999	4.21652	5.20573	5.24798	3.02471	5.1893
0.151591	0.0397337	0.096702	0.0512108	0.284272	0.350181	1.26279	0.295426	0.520264	1.28401	0.131833	4.34928	0.747601	0.058127	0.0382587	0.431968	0.64162	0.197239	0.16823	2.48175	2.17299	0.128582	0.0874975	0.749468	2.10446	2.86027	3.06947	2.84499	1.90385	3.39582	1.3622	1.77425
0.0521773	0.0149871	0.108056	0.156859	0.374094	0.198369	1.86766	0.274311	0.865556	0.299657	0.184753	4.36871	2.17497	0	0	0.395959	0.992622	0.264092	0.296935	2.9922	3.19969	0.151751	0.59469	0.138089	4.08649	4.95744	4.75269	2.83364	3.6548	5.2491	2.01493	7.31671
0.106422	0.0527095	0.0410601	0.0788515	0.216435	0.0944342	1.1818	0.0460657	0.969643	0.250765	0.127941	4.34898	2.40117	0	0	0.838171	1.04499	0.0761889	0.0815698	1.98028	3.22215	0.0533098	0.11546	0.47677	2.09093	1.66504	2.31953	2.31481	4.33871	4.24144	1.18649	1.64888
0.105124	0.214156	0.193661	0.271515	0.937736	1.47619	3.4285	1.28403	2.40877	2.70208	0.458245	4.69663	2.00403	0.0536196	0.023611	1.4842	2.47011	1.18861	0.792931	4.22672	3.21508	0.882008	1.50019	0.584369	4.3254	5.69548	5.20088	3.60816	5.12801	5.18348	2.64957	7.28515
0.0816108	0.206664	0.237853	0.312673	0.526643	0.865777	3.05306	0.716055	1.16709	1.00736	0.180978	4.1855	2.43274	0.0174202	0	1.22908	2.24068	0.692114	0.515944	3.68098	2.9343	0.669879	1.00072	0.648839	4.9835	5.26867	6.3872	4.18297	4.22315	5.38913	2.57357	2.9714
0.0264281	0.106859	0.117151	0.148648	0.57591	0.511993	2.62335	0.271666	0.870819	0.665714	0.0187243	4.41249	1.52939	0	0	1.64259	1.98457	0.526092	0.323416	3.8732	2.78444	0.128726	1.90638	0.369284	5.34762	5.7457	7.47164	3.99186	4.29602	5.5036	2.05613	5.45889
0.0342481	0.015638	0.0145644	0.0597818	0.0891622	0.0446973	1.15832	0.0799974	0.380583	0.111447	0.0146194	4.26767	0.574575	0	0	0.252383	0.595716	0.341224	0.0719131	4.51533	1.52358	0.00951187	0.262626	1.47303	1.51068	2.95035	3.69622	2.91155	1.80941	3.76701	0.696351	2.73319
0.0744097	0.250149	0.0784584	0.259654	0.509839	0.55689	2.60191	0.264621	0.843469	0.416897	0.0489668	4.28049	2.02161	0.0146386	0	0.908477	1.70431	0.546279	0.29134	3.07352	2.64232	0.271914	1.1494	-0.158979	5.92569	4.74478	6.65037	3.10005	5.51846	4.71953	1.41141	4.83733
0.0295034	0.0980124	0.184405	0.231865	0.475222	0.555656	2.68627	0.328143	1.112	0.705697	0.0768959	3.94314	2.59244	0	0	0.842966	1.71613	0.484962	0.38095	3.7188	2.91777	0.164648	0.990856	0.547383	4.62801	5.39773	5.67114	3.91243	4.64876	6.0767	2.32926	5.19682
0.00821444	0.0277605	0	0.104903	0.329343	0.0928613	2.16545	0.280454	1.0757	0.355012	0.0173579	3.28526	0.247852	0	0	0.630793	1.71712	0.0482037	0.0572691	2.76804	1.62526	0.0610688	0.775566	1.10548	0.814116	3.95829	4.92883	4.13628	1.55718	4.67838	1.59863	2.79967
0.0156396	0.176066	0.179322	0.310276	0.723177	0.773889	3.62358	0.681319	1.65284	3.29089	0.0651723	3.79166	2.03805	0.0579025	0.0994714	1.52447	2.76015	0.995993	0.711668	4.27887	2.9115	0.261631	0.154758	0.315892	5.53321	5.64664	7.77773	4.46412	6.76833	5.93381	2.19511	7.61832
0.0436348	0.00626698	0.0116474	0	0.108835	0.039745	0.857885	0.0109112	0.434207	0.540088	0.0232887	3.45421	1.82921	0	0.00903818	0.575106	0.872568	0.0852972	0.104146	2.19339	1.68598	0.0264408	0.0228307	0.824588	0.681092	1.34477	0.20025	2.24803	0.687694	3.86154	1.30998	5.7847
0.0438562	0.012571	0.0462691	0.0717097	0.364546	0.200132	2.08765	0.367341	1.00569	0.905439	0.145772	3.73748	1.31543	0	0	0.487814	1.22599	0.233898	0.210798	2.83496	2.88311	0.13174	0.247385	0.829968	2.3318	2.54228	2.11778	3.0489	5.43847	5.91442	3.04269	4.11274
0.00873243	0.00989998	0.00921906	0.0872887	0.160584	0.207431	1.05132	0.296485	0.567378	0.813294	0	4.3754	0.806006	0	0	0.87421	0.845966	0.325248	0.060816	1.85519	1.76673	0.126902	0.0594234	-0.1059	2.23939	3.83935	5.40295	2.94843	4.84972	3.30597	0.664465	5.57673
0.0347366	0	0.0184434	0.0753936	0.27671	0.168818	1.17612	0.613713	0.786822	0.170359	0	4.44212	0.774137	0	0.028498	2.06229	1.6698	0.615131	0.175835	2.48732	2.2104	0.343027	0.654315	0.249141	2.17174	4.40052	4.80991	3.61381	5.23136	3.43475	0.915734	5.39029
0.0168204	0.163119	0.078231	0.616871	0.830289	0.794032	1.86752	1.12626	0.987255	1.78673	0.291292	4.40929	0.724273	0.0417674	0.0807957	2.76566	2.44373	0.886745	0.43665	3.00423	2.16844	0.459842	0.474949	0.119623	3.02218	4.55031	7.41928	3.81771	5.88402	3.18669	0.610268	5.84986
0.00688079	0.0309558	0.0500996	0.0691725	0.280609	0.106398	0.725781	0.442877	0.282211	0.175161	0.0289493	4.38027	0.739303	0	0	1.56303	1.02746	0.306916	0.0121768	2.19286	1.26658	0.0875038	0.489505	0.476726	1.83265	4.47934	5.16248	3.60377	3.0185	2.95103	1.23878	2.39734
0.0210413	0.0238411	0.0222086	0.1336	0.323285	0.535082	1.84124	1.20184	0.915804	0.948867	0.0550976	4.08794	0.9633	0.0263038	0.0342916	1.99398	2.47516	0.727397	0.363474	3.17371	1.84036	0.437202	1.6352	0.293135	2.57526	4.63206	6.74804	3.80541	4.58858	3.49101	0.90975	7.30637
0.0729452	0.04639	0.10167	0.2666	0.284065	0.439816	1.87724	0.424291	0.61088	0.651241	0.150479	4.87709	1.78391	0	0	1.00296	1.58907	0.473632	0.316371	3.03445	2.50172	0.162216	0.556743	-0.0982489	4.87269	5.26438	6.90958	3.48797	5.86877	4.25855	1.37093	5.74651
0.15325	0.172625	0.134558	0.370947	0.832557	0.929177	3.14108	1.11511	1.35175	3.00984	0.488349	4.19316	1.86813	0.0518801	0	1.06333	1.71267	0.9029	0.535282	3.6155	3.16857	0.460148	1.09807	0.473371	3.96922	5.09583	5.57242	3.40302	5.6015	5.5485	2.78573	5.91856
0.0648023	0.0223771	0.120774	0.156555	0.879211	0.375781	3.361	0.305968	1.30662	0.822063	0.618833	3.48095	3.51012	0	0	1.28894	1.69983	0.241529	0.916723	4.61641	4.14538	0.203895	1.31564	0.657575	6.27035	6.65159	7.76915	5.18605	5.2928	7.42547	4.16645	7.98965
0.19993	0.390173	0.30018	0.832486	1.03846	1.77379	3.43306	1.40062	1.71218	3.85191	0.339528	4.24055	2.20999	0	0.0183617	1.44225	2.11999	1.43663	0.968676	3.82578	2.22089	0.783796	0.406106	0.457951	4.26738	5.64537	5.69693	3.85832	5.76066	4.92308	2.54488	6.44344
0.08518	0.0179815	0.0897968	0.0232259	0.345837	0.174729	1.38476	0.259232	0.625188	0.476136	0.0660999	3.36468	1.83017	0	0	0.649815	0.876415	0.20606	0.121977	2.72849	3.14491	2.40315	0.0648187	0.597634	2.75245	3.17061	3.33292	3.78072	3.71142	5.35345	1.84594	6.25115
0.0854453	0.0965333	0.0987818	0.301966	0.612928	0.986414	2.81039	1.10194	1.5073	1.73895	0.158863	4.18904	2.72422	0	0.0143406	1.09663	2.15592	0.913376	0.507807	3.4732	2.5943	0.466989	2.05985	0.185773	3.61925	5.2888	6.6556	3.13137	5.26629	4.36284	1.52591	6.87488
0.131477	0.0588308	0.138485	0.380295	0.622352	1.25297	2.64973	0.990675	0.960914	1.77228	0.0658143	3.91065	2.98962	0.0262816	0	1.16262	1.77098	1.23503	0.811249	3.92774	3.11548	0.479329	1.33629	0.494732	4.7834	5.64245	5.79163	4.2579	5.59886	5.7337	2.38778	6.54689
0.12385	0.0825104	0.150034	0.238817	0.631303	0.706379	1.98864	0.356069	0.78479	2.08591	0.0976201	4.22308	2.74656	0.0169486	0	1.25022	1.18963	0.668599	0.416384	3.3332	3.18065	0.329492	0.530462	-0.331023	6.32119	5.13918	7.32721	3.52527	5.97785	4.39547	1.3236	7.81327
0.0513535	0.0499473	0.0842368	0.105643	0.621942	0.425246	2.23001	0.363653	0.781536	0.841638	0.164412	4.04038	3.05552	0	0.012176	0.964774	1.47788	0.293827	0.391822	3.4978	2.69466	0.187742	1.07333	-0.0859036	4.70471	5.64428	6.20418	3.89871	8.07103	5.83207	2.0527	9.85559
0.148741	0.153123	0.0661395	0.453634	0.54947	0.896957	3.42011	0.840633	1.84399	1.98007	0.115985	3.62971	2.47431	0.017729	0.0116132	1.47225	2.22438	0.648819	0.295783	3.71579	3.11949	0.407327	0.193578	0.753281	3.39846	5.06482	4.92612	4.22571	9.89283	6.45952	3.51456	3.34885
0.117039	0.15551	0.29708	0.464484	0.652089	1.18896	3.32853	0.720426	1.56654	1.1119	0.196041	4.07433	2.57718	0.0743927	0.0247379	1.54258	2.32187	1.02653	0.625848	4.21919	3.36862	0.644834	1.44324	0.389521	5.72427	6.0808	7.07615	4.19019	5.44235	5.76863	2.42092	6.43621
0.0816148	0.562417	0.140682	0.239187	0.690518	1.33074	2.6995	1.03479	0.967298	1.34858	0.20263	4.14531	1.99769	0	0.0151948	1.28009	2.18875	0.864657	1.03901	3.53105	3.23863	0.948911	1.24523	-0.131808	5.09958	6.38146	6.90193	3.5981	7.01029	5.14051	1.74707	8.00258
0.0958062	0.095874	0.162743	0.327561	0.723655	0.677699	2.67774	0.625935	0.945619	2.26971	0.152254	4.21316	2.6831	0	0.00950885	1.2841	1.1666	0.502407	0.515662	3.03321	2.91078	0.372642	0.53921	-0.110703	5.84796	4.8132	5.20696	3.13043	5.04536	4.56521	1.45522	5.54096
0.0853861	0.0964667	0.135488	0.0448591	0.307954	0.313507	1.67472	0.200336	0.548476	0.853623	0.0643548	4.04176	1.70635	0	0.00844689	0.528959	0.85228	0.589837	0.244162	2.91443	2.53525	0.271896	0.279327	0.260041	4.19791	4.49555	5.71136	3.07304	3.55296	4.24669	1.28335	3.31244
0.0522381	0.248761	0.0994678	0.434822	0.518841	0.975224	2.83349	0.674072	1.43308	2.21742	0.108574	4.67654	2.82136	0.0437443	0.0144432	1.28298	2.6968	1.09327	0.5436	4.07349	3.28035	0.77816	1.54366	1.08418	3.69187	4.94393	5.76464	4.39949	3.53103	5.82059	3.27868	4.48118
0.0479362	0.099176	0.146683	1.10266	0.400767	0.52509	1.99774	0.252073	1.17005	2.06688	0.0719765	4.07585	1.79638	0.195435	0.0113555	0.744555	1.99993	0.309553	0.259194	4.11529	3.02101	0.217605	0.163937	1.1403	3.73366	4.29938	3.01899	4.22286	7.1649	6.28605	4.04728	3.99348
0.0924793	0.111149	0.170981	0.167444	0.486374	0.453477	2.47668	0.495962	0.983902	2.13164	0.292233	4.67882	2.2259	0	0	0.736472	1.21093	0.558464	0.42684	3.12356	3.09351	0.396124	0.482717	0.0329634	5.40674	6.21987	4.82585	3.50412	4.41123	6.11811	2.08798	6.97687
0.158206	0.493124	0.177008	0.314759	0.760442	1.48648	3.36092	1.34246	2.0741	2.94506	0.268718	4.69344	1.8159	0	0.00909658	1.3612	2.9048	0.980504	0.734994	3.79098	2.8778	0.91095	1.22188	1.34286	2.88453	4.26754	5.04629	4.42664	3.86211	6.0381	3.54641	1.81143
0.0853557	0.0755531	0.11877	0.249555	0.716193	0.769531	3.07665	0.887937	1.58701	1.0922	0.587317	3.47795	2.92403	0	0	1.23386	2.22494	0.852742	0.506125	3.98611	3.51351	0.561217	1.78199	0.774359	5.62444	6.36081	4.9601	4.48761	3.88104	7.21004	3.83402	5.14518
0.119634	1.01955	0.193406	0.42048	0.708891	1.99964	3.24219	2.0479	1.74057	4.27295	0.274364	4.27313	2.12504	0.0148015	0.0478228	1.66668	2.56376	1.92326	1.0568	4.0554	3.01575	1.59221	0.393599	0.733198	3.98439	5.01758	6.88141	4.00121	4.12405	5.31725	2.56418	5.76154
0.117542	0.132607	0.162863	0.115103	0.583217	0.559319	3.17698	0.615081	1.33813	0.788796	0.104303	3.92552	2.94143	0	0	1.66632	1.80173	0.548931	0.46073	3.98876	3.19405	0.308717	1.57022	0.721838	5.72682	5.3583	5.53025	4.66831	3.88582	5.53636	2.98847	4.66607
0.179496	0.0463737	0.211813	0.161381	0.61274	0.452996	2.63557	0.213506	1.11656	0.530472	0.085499	3.77091	2.5991	0.0206671	0	0.884152	1.62872	0.485312	0.535419	2.64761	2.76293	0.182468	0.142388	0.00927702	2.58291	3.87971	4.96285	2.76587	5.06246	2.85514	1.04333	7.68266
0.0275058	0.139964	0.191906	0.225889	0.350559	0.462777	2.78807	0.139497	1.29268	0.531564	0.01949	4.05885	2.25387	0	0.0593823	0.611834	1.78982	0.236542	0.373801	3.55881	2.94967	0.139584	1.09601	0.284465	5.11209	4.98915	5.30209	3.49473	5.33307	6.10809	1.9934	5.99682
0.0318543	0.204044	0.111231	0.226975	0.625117	0.764331	2.86479	0.793258	1.42396	1.28069	0.0796896	3.37053	1.8199	0.0160455	0.0105083	1.01219	2.03432	0.948526	0.422663	3.7697	2.98267	0.585939	0.904646	1.18494	3.23024	4.07568	4.61754	4.21203	2.81862	6.84171	3.77753	5.24722
0.0409659	0.124107	0.0217729	0.338218	0.261156	0.547062	2.09248	0.424166	0.929647	0.720801	0.0855005	3.93948	2.49087	0	0.0336215	0.758365	1.48635	0.728548	0.427271	2.83688	2.96963	0.419069	0.0564407	0.178869	4.19231	5.25013	4.8037	3.29683	5.65898	3.73163	2.16603	3.70005
0.0745203	0.0511267	0.108845	0.390888	0.250206	0.529694	2.0843	0.394558	0.637009	0.393463	0	4.57841	1.55358	0	0.0370837	2.35112	1.8333	0.395537	0.326261	2.57606	2.50836	0.263885	1.68599	0.0218594	4.21893	4.70646	7.06216	3.89782	4.47517	3.74861	1.56715	5.20215
0.0518626	0.0586809	0.0623564	0.334475	0.452342	0.732992	2.6306	0.696451	1.27373	0.556438	0.151655	4.09166	1.82787	0	0	1.59948	2.49347	0.787422	0.332937	3.32663	2.73148	0.404858	2.22188	-0.0859659	4.55097	5.37856	6.96288	3.70084	6.77728	4.72912	1.5608	8.21758
0.0452803	0.224969	0.189382	0.209113	0.441459	0.917926	2.87435	0.786759	1.138	1.52556	0.0943543	4.41415	2.44716	0.0748355	0.0124975	1.21845	2.17919	0.743776	0.471211	3.89991	2.89585	0.579026	1.29284	0.382116	4.60536	5.81731	7.09341	4.2848	5.81756	5.45836	2.19335	6.92649
0.0554082	0.167808	0.0961313	0.131945	0.599396	0.76522	2.98543	0.542035	1.55918	0.947518	0.221562	4.11498	2.37029	0.0156355	0.0102393	0.967188	2.25982	0.341973	0.658524	4.01883	2.6708	0.423741	0.179606	0.825118	4.77428	6.62991	7.40301	4.77343	3.73326	8.27176	3.35718	5.15629
0.0422984	0.0758635	0.113277	0.264074	0.341695	0.763132	2.75172	0.358918	1.18009	0.6402	0.155138	4.20409	3.0736	0.0213446	0.027841	1.1483	2.09739	0.424684	0.762395	4.33536	3.06675	0.417814	1.55841	0.586119	5.38754	6.29916	7.03701	4.39407	4.87646	6.50969	3.59281	7.57905
0.0349599	0.019929	0.0728594	0.194079	0.51158	0.468593	2.93147	0.284879	1.22547	0.705556	0.142729	4.03889	2.99108	0	0.0568042	0.799414	1.94593	0.342075	0.498893	3.94824	3.19651	0.12812	1.42323	0.609016	5.02796	5.47253	5.70917	4.2275	5.34113	5.7055	2.9366	5.29552
0.11118	0.0451645	0.100172	0.197824	0.498694	0.346056	3.09399	0.344101	1.2441	0.523845	0.0832986	3.65252	3.45604	0.0144025	0.00943049	0.616451	2.43771	0.3894	0.70039	4.80726	2.8463	0.267893	2.20194	1.44152	2.98754	5.36976	6.8531	4.55651	5.04792	7.82075	3.39291	3.75326
0.0496022	0.056129	0.0777933	0.174204	0.247857	0.363298	2.84089	0.25127	1.70717	0.41935	0.152151	4.55929	2.5758	0	0	1.01426	2.69461	0.466329	0.520161	3.90219	2.93522	0.232142	0.447211	1.02789	4.04606	5.56132	5.74735	4.82495	4.38147	6.87403	3.40613	3.95416
0.0454012	0.0450611	0.0770457	0.129402	0.506025	0.447325	2.44801	0.269634	1.02514	0.45954	0.106003	3.67345	2.66287	0.0285967	0	0.670998	1.59198	0.316977	0.467381	3.49271	3.28943	0.20327	0.997409	0.329877	5.12842	4.48628	5.61471	3.60938	4.86843	5.59644	2.14179	5.66696
0.089179	0.248572	0.0664414	0.428952	0.604709	1.12032	3.82302	0.564856	2.05269	0.883217	0.266342	3.85375	2.40643	0.0228601	0	1.54399	2.8186	0.602687	0.646397	4.33612	3.37079	0.5555	1.54433	1.01963	5.81442	5.97459	6.2694	5.44429	5.20732	6.64021	3.66564	2.70377
0.193939	0.164292	0.0922816	0.265417	0.619512	0.902644	3.31354	0.759477	1.22935	0.402445	0.110452	3.99872	3.31978	0.0224307	0	1.50427	2.67876	0.823172	0.837915	4.95256	3.5357	0.503575	2.37687	1.00284	6.55897	7.87465	6.8899	5.60957	5.94896	7.51998	4.63172	4.21942
0.117361	0.0229286	0.0213581	0.186753	0.494143	0.36491	2.02092	0.417097	0.978548	0.731075	0.110825	4.33398	3.09769	0.0169144	0.0110785	0.50579	1.28322	0.345759	0.379076	3.90557	2.72474	0.1466	0.09115	1.17062	3.70329	4.24369	5.24955	3.8678	3.18067	6.34615	3.65083	2.84278
0.085243	0.0409114	0.0605263	0.0732836	0.338036	0.244341	1.84184	0.497035	0.740631	0.930954	0.0755473	4.54147	2.90236	0.0182136	0	0.572554	1.38496	0.538756	0.394782	3.52717	2.22437	0.102087	0.135356	0.211715	5.30805	5.24693	7.39357	3.83316	5.69223	5.55422	1.64973	4.34962
0.0380461	0.0599511	0.0161918	0.0663468	0.232122	0.356166	1.38387	0.476233	0.37245	0.638422	0.0482193	4.05489	0.973142	0	0.012569	0.921904	0.951137	0.691379	0.21547	2.59579	2.099	0.211886	0.161501	0.22174	2.44254	4.25115	6.47615	3.1378	4.80201	3.31351	1.40788	4.49416
0.0410889	0.054122	0.078509	0.0889552	0.204584	0.399284	1.52675	0.308107	0.60419	1.00659	0.0146509	3.53388	2.27937	0	0	0.820771	1.1727	0.363462	0.268891	2.79666	3.14756	0.17115	0.271142	0.643518	3.08194	3.51854	3.9368	3.45649	3.85278	5.04825	2.09626	3.48916
0.0605536	0.155023	0.0569069	0.134696	1.00105	0.557157	1.72884	0.697534	0.944099	1.62396	0.203447	3.28183	1.46033	0.0340183	0	1.24631	1.68677	0.665126	0.373564	2.66474	2.9557	0.518829	0.276343	-0.104899	3.72407	5.30086	4.74682	3.15578	6.28093	4.32519	0.934774	6.23352
0.136538	0.162473	0.0779123	0.107187	0.579828	0.622587	2.6077	0.501569	1.08837	0.926718	0.27551	4.26962	2.71337	0.0415951	0	0.721533	1.13452	0.731308	0.531219	3.56962	3.33639	0.384589	0.0459365	0.426951	4.58721	6.05502	5.26242	3.66915	3.9825	5.49567	3.31166	7.1008
0.0708355	0.0644155	0.0891806	0.0928462	0.287914	0.354251	1.4867	0.573099	0.75043	0.964364	0.146237	3.46584	1.90468	0	0.0235802	0.733671	1.19693	0.309827	0.311389	2.82907	2.64044	0.195979	0.619898	0.343582	3.61446	3.93223	5.26377	3.13285	3.08359	3.95933	1.49443	4.42757
0.0091518	0.0309045	0.057023	0.141086	0.704918	0.152041	3.0238	0.2495	1.52601	1.90977	0.0384078	3.63797	3.22191	0	0	0.513831	1.90528	0.25015	0.49177	3.5015	2.91943	0.0799064	0.245027	1.06736	3.17127	3.76438	4.38892	3.62069	2.95322	5.81766	3.02669	2.9298
0.0342036	0.0259361	0.0596613	0.016834	1.04914	0.195962	0.495815	0.0668826	0.20145	0.269817	0	3.12666	0.909669	0	0.0187671	0.374353	0.304202	0.0887487	0.117789	1.06882	2.89014	0.0468836	0	-0.406589	1.54876	2.97776	2.08994	2.76849	6.70266	1.94543	0.46196	7.64403
0.0711157	0.426369	0.0658266	0.245366	0.417092	0.776032	2.48848	0.88711	1.08939	1.32801	0.231502	4.4777	1.75072	0.0449409	0.0148424	1.33641	2.58185	0.621701	0.317718	4.75143	3.61184	0.783885	1.28901	1.31566	4.2894	6.02331	6.84237	5.65301	4.12641	6.41296	4.18172	5.65513
0.0731507	0.0451126	0.10006	0.0417463	0.223337	0.143801	1.2574	0.288733	0.657836	0.263792	0.036248	3.68464	0.938587	0	0	0.720502	0.623124	0.162253	0.145873	2.29619	2.87215	0.186132	0.523884	0.797015	2.56169	3.30516	4.43621	3.39669	1.86171	4.84812	2.47315	0.968491
0.0849685	0.0678624	0.0454822	0.146446	0.184247	0.358994	1.27926	0.310304	0.500377	1.59468	0.107231	4.36595	1.68112	0	0	0.423593	0.911826	0.612993	0.16132	1.91273	2.44397	0.233148	0.138604	-0.097852	3.8416	4.55807	4.38883	2.60014	3.59602	3.67778	1.14327	3.16658
0.112483	0.141153	0.0777922	0.266649	0.745649	0.60798	3.10148	0.391021	1.48174	0.667916	0.228838	4.24404	3.48292	0	0	1.05193	2.34019	0.622239	0.48281	3.85697	3.47164	0.26339	1.4737	0.413371	4.98549	5.22897	6.00403	3.89655	4.68464	5.9423	2.50994	7.45287
0.140516	0.0654478	0.119575	0.173276	0.261098	0.282007	1.8997	0.152225	0.548258	0.306573	0.0309513	3.93554	2.48327	0	0	0.903219	1.25853	0.290655	0.273308	3.16694	2.72039	0.176681	1.02464	0.0273264	6.29032	4.88101	6.79142	3.94326	4.57208	5.59407	2.20922	5.78203
0.112507	0.221043	0.0644337	0.0561358	0.587096	0.240003	2.33356	0.329594	1.15944	1.01081	0.156551	3.78672	1.7523	0	0	0.854906	1.62436	0.215204	0.241401	3.14093	2.99334	0.152721	0.656921	0.695321	2.54539	3.80137	4.87219	3.45236	2.87049	5.60621	2.34864	6.63395
0.230809	1.17798	0.230221	0.789521	1.41816	2.59861	4.5448	2.65526	2.10749	3.19841	0.494299	4.66987	2.24642	0	0	1.76844	3.03689	2.52373	1.46918	4.99536	3.63326	2.47636	1.87325	1.23455	4.99915	5.86994	7.484	4.70597	4.77983	6.67001	4.18611	3.59492
0.0830115	0.110211	0.170022	0.109722	0.280161	0.37168	2.03516	0.316065	0.634074	0.590133	0.0325625	3.6557	1.50016	2.35427	0.276877	0.348615	1.14082	0.20102	0.118909	2.75832	2.38924	0.171233	0.518615	0.546299	3.68035	4.02408	3.38361	3.49548	3.1117	5.58568	1.96514	4.29323
0.10373	0.35367	0.203902	0.409501	0.81632	1.45613	3.27014	1.71606	1.43096	2.73007	0.928293	3.97463	2.34306	0	0	1.62397	2.12576	1.46112	0.952056	3.60286	3.30594	1.10992	0.253114	0.284595	4.85958	6.72603	4.90115	4.14511	5.83538	6.47833	2.70908	7.86455
0.0282653	0.363009	0.101811	0.15853	0.457962	0.361043	2.20276	0.466272	0.827169	1.053	0.274655	4.88612	1.55506	0	0	1.47409	1.56737	0.361219	0.200481	3.58391	2.91679	0.296469	0.949961	0.67245	3.78701	4.71695	6.06168	3.61761	3.78506	6.04133	2.1325	4.42384
0.0412719	0.104648	0.0798505	0.0685688	0.139546	0.287157	1.92126	0.528855	1.00385	0.62143	0.0741356	4.45112	1.48241	0	0	0.24126	1.18953	0.135765	0.160409	3.1869	3.15327	0.141095	0.064803	0.606041	2.86655	4.02686	4.36138	2.8141	2.844	5.94033	2.29423	6.34882
0.0527182	0.172016	0.109154	0.0767246	0.325673	0.369488	2.07081	0.502962	0.76719	1.25245	0.0497199	3.67578	1.73183	0	0	0.684456	1.09006	0.418226	0.312597	2.56326	2.09277	0.275787	0.118921	0.618744	2.69393	3.67178	5.06318	3.73108	2.87508	4.47931	1.44279	2.72332
0.0514387	0.0808414	0.0110167	0.278682	0.504521	0.754255	3.10227	0.798628	1.53827	0.861365	0.453475	4.06264	2.1782	0.0130574	0.00854837	1.10463	2.1292	0.81815	0.510694	3.70408	3.18854	0.65279	1.24955	0.850034	4.61608	6.24506	3.9816	4.56984	3.67194	5.59748	3.20068	4.06153
0.0536519	0.0607005	0.0931252	0.0906831	0.612143	0.51335	2.11468	0.405698	1.05581	1.57981	0.129222	3.51671	1.5996	0	0	1.14034	1.10691	0.53695	0.50003	2.63624	2.19003	0.193397	0.188978	0.0161901	2.44674	5.22939	6.30678	2.94278	6.84058	4.36657	1.47499	5.64978
0.042942	0.0366081	0.0892313	0.151666	0.235503	0.374963	2.58315	0.534226	1.55982	0.617441	0.0454745	4.55147	1.83202	0	0	0.795597	2.07163	1.11672	0.431005	3.75697	3.28411	0.278794	1.02559	0.540396	4.46097	5.59849	6.77077	4.3188	6.2197	6.35806	2.63763	5.02458
0	0.150023	0.148482	0.299172	0.387581	0.886085	2.22408	0.609322	0.930013	0.481313	0.054369	4.00572	0.864938	0	0.0141944	1.84538	2.0626	0.252959	0.317601	2.26086	2.58103	0.216773	1.52716	-0.419761	4.53688	4.9494	6.89267	3.26813	4.88552	3.53977	1.24945	7.24692
0.0616805	0.0782461	0.0570793	0.234249	0.613005	0.354036	2.24966	0.462545	0.905101	1.04272	0.172895	3.90664	1.77153	0	0	1.29035	2.52405	0.26995	0.502084	3.03895	2.7628	0.206776	0.65518	-0.117721	5.05633	6.29236	5.08022	3.85182	5.97084	4.90221	1.99321	8.15604
0.0512499	0.0484848	0.0803518	0.110509	0.110995	0.138651	1.41048	0.13141	0.682165	0.527797	0	4.26313	1.99121	0.0429143	0	0.703523	1.62023	0.131766	0.214477	3.14972	2.5139	0.0871023	0.17022	0.277899	3.75592	5.43001	6.63065	4.22398	4.7138	4.03323	1.29733	5.63148
0.068151	0.0877336	0.0415045	0.139361	0.260017	0.170843	1.735	0.113707	0.889941	0.565408	0.08215	3.88072	1.65232	0	0	0.845135	1.29294	0.236561	0.0520746	2.78971	2.40175	0.0930168	0.57355	0.252917	2.96317	3.99078	4.62353	3.18265	3.27963	4.28709	1.02019	7.22304
0.0282556	0.0633147	0.0781872	0.231632	0.440045	0.417735	1.83617	0.580624	0.647841	1.44853	0.307525	3.887	1.9294	0	0.015489	0.949872	1.3549	0.490948	0.408473	3.12111	3.08138	0.347444	1.36731	0.166787	3.74598	4.43197	4.90985	3.19995	4.82871	4.28848	1.35614	7.23327
0.127395	0.436568	0.493853	0.411706	1.18028	1.72288	3.86439	1.18786	2.02344	2.14652	0.150666	4.10742	3.13121	0.0207013	0.0270037	1.87185	3.47995	1.35414	0.452356	4.63646	2.92194	0.954118	2.61429	1.23488	4.89551	5.69829	4.5704	4.86466	3.55953	6.29699	2.87179	3.61151
0.0668201	0.185741	0.159367	0.197711	0.680002	0.789328	2.38616	0.604915	1.11569	0.478004	0.0630372	4.09501	1.94528	0.0189096	0.0123883	1.34856	1.95302	0.635717	0.524979	3.70322	3.09341	0.309541	2.49766	0.278216	5.53689	5.5458	6.99294	3.95308	4.72735	5.44898	2.5063	6.13591
0.121205	0.069978	0.145904	0.149692	0.533346	0.519731	1.78088	0.262246	0.623857	0.432257	0	4.62659	2.9392	0	0	1.82019	1.334	0.467213	0.355799	3.40077	2.66447	0.116985	1.423	-0.0986045	5.88336	4.78875	7.76854	3.8849	5.37514	4.06503	1.20776	6.51088
0.10176	0.0237199	0.120957	0.0704621	0.795761	0.332068	2.66498	0.419288	1.32406	0.505613	0.0294967	3.75554	1.84329	0	0	1.27731	1.82892	0.409865	0.261438	3.30865	3.27414	0.177348	0.2821	1.17825	1.8468	2.70104	2.85022	4.33985	4.13069	5.53111	2.56588	5.28119
0.0470074	0.208666	0.201479	0.407476	0.496196	0.882479	3.12213	0.398534	1.14059	0.912363	0.0978909	4.03522	2.6833	0.016997	0.0111327	1.2914	2.10262	0.600407	0.417421	3.30508	3.05444	0.311529	3.5815	0.273888	5.26903	5.83763	6.07536	3.81947	4.65364	4.67287	2.21632	3.69345
0.0819579	0.896733	0.0983369	0.610683	1.1718	2.0733	4.14579	2.09985	2.56666	2.85564	0.563589	4.13458	2.1434	0.0298644	0.0195907	1.99652	3.31418	1.47104	1.62644	4.33197	3.69669	1.63409	0.689797	0.902135	4.16896	4.86913	6.57629	4.6272	6.13821	6.47809	4.29712	7.34626
0.0879264	0.284836	0.174486	0.575273	0.444452	0.947766	1.69936	0.764796	1.64216	1.99809	0.0930276	3.27944	1.61114	0.0141235	0.0184361	2.72226	1.79971	2.25647	0.572828	4.04591	2.8914	1.01386	0.0539225	1.15352	2.29179	1.31358	0.753267	2.55102	4.61731	4.67207	1.84599	5.80275
0.0931161	0.0376855	0.0886288	0.108731	0.633398	0.330145	2.05328	0.629697	1.18123	1.26144	0.0889547	4.7549	2.16975	0	0	1.13041	1.51681	0.419227	0.242715	2.88281	2.83536	0.635104	0.623181	0.706147	2.63614	3.56586	4.22756	3.44301	3.26187	4.90725	1.92646	3.98562
0.104494	0.0601825	0.0725255	0.0924055	0.415241	0.46457	2.86207	0.358713	1.6829	0.554286	0.0890832	3.60664	1.97037	0.0268924	0	0.394348	1.69754	0.218955	0.340684	3.12328	3.37496	0.121556	0.569339	1.00756	2.77351	3.29244	3	3.46061	2.02198	5.71385	3.13453	4.67275
0.0359829	0.0357126	0.0931106	0.175975	0.395914	0.257333	2.65568	0.137373	0.955702	0.721995	0.0934524	3.78005	4.15897	0	0	0.75591	1.14808	0.137745	0.33692	3.64285	2.87005	0.0371406	1.07474	0.498127	4.81615	4.33679	5.56465	3.31258	4.37832	5.56492	2.24964	4.5583
0.0534505	0.089785	0.175717	0.255656	0.726764	0.748279	2.71562	0.200758	1.19517	1.29627	0.13752	3.82294	2.77418	0.0337014	0	1.93447	2.60299	0.377903	0.486978	3.61945	2.71144	0.159528	1.39717	0.0311711	6.1286	6.04144	6.51508	4.33966	5.93469	5.68065	1.87652	7.33386
0.0637049	0.0895037	0.273286	0.40382	0.635026	0.84863	2.7093	0.237054	1.15004	0.762638	0.0674336	4.44494	2.39938	0	0.0264162	1.32761	2.15097	0.692091	0.464875	3.24219	2.92603	0.297723	2.21012	-0.0568996	5.40945	5.32093	6.66943	3.38677	5.2492	4.18694	1.70654	5.92992
0.399262	0.0924915	0.173798	0.028246	0.214651	0	1.14401	0.0127569	0.825518	0.0165648	0.0670828	3.62462	1.41826	0	0	0.751815	0.913131	0.0628598	0.183133	2.08372	2.41498	0.00889214	0.0870606	1.17735	1.09182	2.11559	0.847774	3.44186	0.662269	6.01564	1.33105	1.18319
0.0688974	0.0549653	0.0726537	0.138164	0.405475	0.541632	2.80745	0.660354	1.08506	0.309176	0.234224	3.90596	1.91542	0	0.0115079	0.74083	1.54614	0.390076	0.343511	3.91282	3.29521	0.320978	0.526488	1.03354	4.90791	5.77075	5.03486	4.42541	4.03855	7.07067	3.83236	2.19764
0.107265	0.0312327	0.103944	0.179074	0.499376	0.638759	1.8614	0.543964	0.601747	0.456453	0.0388147	4.15865	2.2735	0	0	0.725137	0.890876	0.642778	0.484526	2.87874	3.13919	0.179935	0.146545	-0.177005	5.18006	6.00716	5.63219	4.03679	7.40655	4.75986	2.01876	6.76487
0.0829656	0.0687742	0.0951606	0.0883866	0.273476	0.272073	2.09792	0.25287	0.890744	0.521962	0.125991	3.57133	2.99819	0	0	0.696169	1.1609	0.377237	0.240339	2.81446	3.37977	0.254143	0.778702	0.529067	2.5432	3.87152	5.27769	2.91356	3.12411	4.45253	1.49751	3.55666
0.434251	0.0563517	0.0639521	0.0803459	0.377102	0.325081	2.10662	0.254538	0.820196	0.481704	0.0584705	3.83816	1.20609	3.13911	1.5663	0.79371	0.890132	0.217282	0.304782	2.70223	2.80111	0.174974	0.571915	0.386438	3.29736	3.93231	3.46094	3.22193	2.82274	5.60321	2.32795	7.68724
0.0570547	0.378432	0.238598	0.306629	0.784788	0.993893	3.62226	0.727712	1.64131	1.67096	0.216019	3.86741	3.33987	0	0	1.12076	2.34439	1.12002	0.881543	4.43095	3.07848	0.723377	0.663227	0.899637	6.06247	6.69508	6.01622	4.88046	4.21281	7.57236	4.35168	5.18902
0.180967	0.353757	0.190444	0.266248	0.466699	0.88194	3.00303	1.17629	1.16182	1.13939	0.142579	4.26041	3.59322	0	0	0.975064	2.36959	1.06739	0.455448	4.1574	3.04372	0.474527	2.45417	0.884485	5.42971	5.14917	4.92678	4.63615	4.16727	5.97424	3.81332	5.43964
0.053307	0.0454682	0.0767635	0.133135	0.119614	0.127561	1.73494	0.268709	0.693465	0.922482	0.0143181	3.83268	2.64705	0	0	0.367935	0.913706	0.258191	0.170089	2.99019	2.42492	0.0639796	0.0733266	0.841465	2.71697	3.19959	3.2447	3.24831	2.49308	4.81395	1.70649	3.20088
0.119156	0.275865	0.163012	0.84645	0.662468	1.32596	2.78778	0.393626	1.53011	1.33386	0.106815	3.99587	1.47611	0	0	1.45465	1.84682	1.20368	0.673128	2.90158	2.81638	0.740442	0.0357764	0.694309	2.92619	3.30246	4.89631	3.40027	2.05701	5.33485	2.86494	5.89002
0.0775296	0.170224	0.116638	0.67283	0.750593	1.17273	4.01616	0.570766	2.79567	1.2124	0.406096	4.30141	3.52869	0.0860517	0.0428273	1.33538	2.78972	0.674636	1.03911	4.14548	3.17435	0.889879	0.762803	0.171383	5.74372	7.22992	8.21465	4.11607	7.83993	6.38859	1.24312	3.83556
0.151922	0.0520465	0.0553144	0.157616	0.553412	0.493048	2.56994	0.60562	1.17941	0.942729	0.270202	4.66989	2.2659	0.0166242	0.0108881	0.827428	1.47289	0.254262	0.39147	3.46415	3.05105	0.275273	0.0982885	0.96378	4.04464	5.54221	4.39936	4.38501	3.72841	7.33601	3.64111	3.4733
0.0513552	0.00739281	0.0674043	0.00955922	0.175629	0.0559666	1.21415	0.147318	0.564937	0.580212	0.0409719	3.23659	1.28232	0	0	0.176981	0.691476	0.0633958	0.0678943	1.48583	2.56568	0.0311519	0.0706596	0.547792	1.05273	2.67231	1.14146	2.27143	1.67598	4.22086	0.965746	1.89771
0.0956081	0.107966	0.0844567	0.138232	0.288602	0.226941	1.66047	0.358754	0.494752	1.06618	0.117328	4.29881	1.62866	0	0	0.508969	0.807334	0.384899	0.191209	2.38861	2.09209	0.165873	0.30716	0.63704	2.06744	3.307	3.1146	3.00946	2.48492	3.78358	1.35226	2.77581
0.130147	0.125664	0.12395	0.213296	0.424462	0.688329	3.13435	0.141033	1.17576	0.623088	0.176424	3.76537	3.43375	0	0.0111066	1.03505	1.81056	0.40891	0.753805	3.45621	3.26093	0.276449	1.06934	0.0876164	5.01043	7.32919	7.15742	3.96507	7.15963	6.5079	2.33539	5.29248
0.166749	0.278674	0.15332	0.231222	1.03305	0.899079	3.35555	1.13457	1.78619	1.67112	0.272366	4.16701	2.35011	0.0146839	0.0191664	1.44973	2.56002	1.20935	0.717609	3.71216	3.15818	0.976123	0.620547	0.987323	2.92466	4.23875	4.7559	3.88903	3.17436	6.04054	3.25396	6.35272
0.104664	0.11002	0.0403666	0.201469	0.584198	0.593055	3.10129	0.594776	1.3075	0.79862	0.17034	3.68344	2.58349	0	0	0.845119	1.63141	0.328657	0.66107	3.3046	2.99054	0.323759	0.171927	-0.0601183	5.55943	6.5232	6.02417	3.70892	6.23388	5.51265	2.37536	6.9084
0.0386221	0.0580116	0.0540828	0.119392	0.315715	0.190931	2.01979	0.280544	0.780533	3.38201	0.0936974	4.04149	1.60061	0.0162492	0	1.30478	1.14482	0.248965	0.244155	3.60628	3.04638	0.216453	0.137796	1.22071	3.07549	4.1808	3.50963	4.18478	3.26145	6.17021	3.94118	4.13453
0.0456897	1.1243	0.0794642	0.160994	0.349009	0.396269	2.16745	0.264867	0.865246	1.16869	0.0797574	4.23494	1.36376	0	0	0.482674	1.11688	0.159634	0.27402	2.90287	3.00911	0.198704	0.0832853	0.439931	2.45566	4.11163	4.94995	3.68037	6.25425	5.36688	3.10427	7.60096
0.122795	0.119512	0.181437	0.495479	0.573325	0.759313	3.35658	0.823587	1.39111	0.873636	0.42308	4.13659	3.08876	0.0889288	0.00995844	0.930184	2.24421	0.620148	0.558304	3.61372	3.34773	0.537453	2.66817	0.678499	4.57693	4.71244	5.5091	4.14453	5.2341	7.52557	3.36544	5.56129
0.0472546	0.269038	0.0706997	0.188553	0.710188	0.883298	2.95615	0.892288	1.16855	1.14868	0.50944	3.50294	3.29063	0	0	1.06344	1.95463	0.944551	0.743871	3.6115	2.38075	0.521556	0.0282393	0.659777	4.64996	5.37958	7.14605	4.67328	3.9689	6.96354	2.18625	4.29547
0.111103	0.0744552	0.0742737	0.0486096	0.135841	0.202252	1.47147	0.144771	0.745461	0.457473	0.0696964	4.08491	2.74038	0	0.00785739	0.525421	1.02529	0.2849	0.106856	2.88778	2.35205	0.141862	0.0651649	1.31638	1.87162	3.36437	1.65385	3.33151	1.36043	6.25591	3.32902	2.06262
0.12892	0.31304	0.234197	0.430676	0.714228	0.979469	3.26684	0.85243	1.24421	0.843273	0.474279	4.40987	2.4074	0	0	1.39542	2.17954	0.832963	0.518103	3.76295	3.25971	0.840408	2.24803	0.44928	4.85903	5.55139	6.15669	4.05829	5.66297	5.37364	3.07984	6.07774
0.100025	0.461654	0.198646	0.496066	0.754026	1.63898	4.1672	1.67341	2.51677	2.3074	0.272924	3.81996	2.98006	0.0270531	0.00889757	1.64651	2.94049	1.81788	1.19297	4.57947	3.43993	0.989734	0.926188	1.17334	5.19255	5.3227	5.10317	5.15025	6.37794	7.81654	4.78825	5.1089
0.0776931	0.200425	0.178173	0.427725	0.823308	0.964372	2.916	1.13098	1.58734	1.92984	0.33788	3.79333	2.29177	0	0	1.39625	2.37772	0.729839	0.53972	3.63238	3.26199	0.634388	1.17314	0.421622	4.94468	4.94604	6.10824	4.27313	5.49452	5.80693	3.85574	8.18129
0.0483609	0.0944523	0.0820105	0.153894	0.378627	0.406633	1.40847	0.31546	0.745329	0.675557	0.0884542	3.89048	1.63539	0	0	0.674776	1.43851	0.354914	0.183945	2.7759	2.88318	0.334647	0.0987306	-0.221358	5.0644	5.32266	4.74787	3.46125	6.8896	4.42896	1.63504	6.83968
0.0787546	0.0756608	0.0705657	0.114157	0.72418	0.312466	2.09212	0.299212	0.835872	0.541063	0.114153	3.01473	2.86046	0	0	1.05501	1.84041	0.259285	0.552628	3.51175	2.85917	0.169645	0.316274	0.594032	5.2411	4.33416	5.50135	4.24879	3.27399	7.08771	3.31888	6.90423
0.0385592	0.206154	0.106042	0.316322	0.697846	0.888215	3.27066	0.920606	1.56591	1.5946	0.447489	4.29351	2.2762	0.0162225	0	1.13455	2.51789	0.637078	0.502039	3.94367	3.18036	0.640997	1.81053	0.753005	5.09532	5.81695	6.3282	4.56923	4.54227	6.15309	3.04852	3.86824
0.210849	0.539993	0.295813	0.921215	1.6251	1.47895	2.51326	1.25934	1.50216	2.15337	0.249206	3.75203	1.97162	0	0.0160716	3.04311	2.14787	2.08293	0.778806	2.91518	3.3204	1.77342	0.0536826	1.04236	2.26007	3.57182	4.64293	3.74671	2.15654	5.97568	2.03999	1.67596
0.0536512	0.190542	0.103394	0.716717	0.866447	1.2381	3.65999	1.28363	2.19712	1.57699	0.46324	4.10684	2.49231	0.0194278	0	1.49922	3.06347	0.698366	0.749605	3.99233	3.75328	0.878412	2.78515	1.27443	4.27807	5.50664	4.48155	4.65887	3.58772	6.89438	4.91486	3.2867
0.0222952	0.0377266	0.0807341	0.0163941	0.0996759	0.0639619	1.53686	0.0862472	0.51517	0.214373	0.114413	2.93946	2.35352	0	0	0.502515	1.1524	0.127858	0.221159	2.84423	2.78489	0.0753339	0.105015	0.378816	4.23021	5.92437	3.83564	3.69525	5.74333	6.86706	2.35586	3.37478
0.0795535	0.341506	0.114878	0.206145	0.548843	1.1843	3.14661	0.987867	1.37888	1.1521	0.255958	4.096	2.34931	0	0	1.01233	2.55975	0.925655	0.715204	4.55098	3.7115	1.16724	0.0763754	1.12244	6.11858	6.18772	6.34421	5.08857	3.12391	7.44958	5.25135	5.01672
0.0510163	0.11323	0.0828682	0.262513	0.36261	0.688111	2.46178	0.56033	1.30075	0.702546	0.393619	3.36512	3.45366	0	0.00941597	0.681324	2.37761	0.577072	0.608534	4.54709	3.47914	0.372492	2.82884	1.19709	3.90112	5.12111	7.6685	4.67564	4.99794	7.74678	3.35697	3.87077
0.114093	0.0749637	0.250122	0.119382	0.550886	0.329586	1.77752	0.387462	1.03081	0.28592	0.0701732	3.58981	1.59273	0	0	0.878749	1.38226	0.349351	0.437586	2.92951	3.52802	0.33919	0.723687	1.11864	2.90627	2.71753	2.67339	3.59272	2.557	5.37111	2.62902	1.0304
0.0808167	0.0669844	0.151357	0.24427	0.672139	0.58797	2.6137	0.221263	1.4098	1.31131	0.249453	3.87897	3.60263	0	0	1.16099	2.25997	0.333109	0.99541	4.11599	3.71162	0.440384	0.423318	0.136614	5.97454	6.35604	7.90495	4.35375	6.57981	6.25605	2.04892	7.61785
0.0645607	0.208792	0.0344447	0.181848	0.476356	0.782579	3.05344	1.01316	1.95671	1.86423	0.368544	4.48574	1.37108	0	0.01345	1.53581	2.91867	0.573294	0.491294	4.396	3.58138	0.818853	0.0113875	1.04773	5.14142	4.81199	5.23484	4.93967	4.78324	8.46509	4.67884	7.7862
0.0919107	0.0585906	0.0759065	0.188336	2.34715	0.811685	2.10502	0.796807	1.26412	1.24043	0.42316	4.03682	0.999181	0	0.0171617	1.31859	2.19114	0.646514	0.361863	3.53257	2.53946	0.440668	1.13401	0.485739	4.20741	4.84413	7.1059	3.82087	3.89213	4.80821	1.56532	4.19181
0.00625516	0.0694013	0.0391783	0.335094	0.452185	0.487043	2.6799	0.444611	1.54626	0.810852	0.114898	4.11752	1.42044	0	0	1.19768	2.10224	0.321851	0.563284	3.36313	3.49104	0.410373	0.973079	0.820592	4.07922	5.01019	5.36109	4.6333	4.37584	6.51401	3.69177	4.55121
0.0702802	0.947507	0.269721	0.852727	1.08126	2.07053	3.13919	2.10026	2.10854	4.02872	0.443391	4.61264	2.27875	0.0179276	0	2.13211	3.02691	1.80127	0.993688	4.37765	3.87279	2.26016	1.2146	0.638195	5.4122	5.25251	6.89624	4.57279	7.07783	6.64008	3.86131	6.88719
0.216022	0.650715	0.143039	0.585404	0.738666	1.62439	3.30701	1.36715	1.70276	2.06906	0.227991	4.32711	3.10512	0	0	1.34429	2.58131	1.03571	0.738301	4.54006	3.9555	1.34379	1.18135	1.11393	5.77023	6.2319	6.14588	5.36358	4.69659	7.63882	3.82413	3.40888
0.0961634	0.16716	0.247502	0.562565	0.785453	0.855747	2.66043	0.799133	1.49188	1.53563	0.222787	4.07049	2.325	0.102983	0	1.64829	3.11784	0.535256	0.35538	3.8027	2.69143	0.586503	2.17602	0.459688	4.3695	4.79013	5.62914	4.18505	5.06046	4.95622	1.56974	7.08296
0.0395578	0.102411	0.121756	0.354776	0.412542	0.814421	3.23309	0.24278	1.53085	0.568071	0.234851	3.76094	2.94274	0	0	0.82826	2.27859	0.412319	0.259594	3.83077	3.13054	0.24487	1.39865	0.732596	4.94988	4.87326	4.49719	3.74479	4.99616	6.91005	3.01524	4.12393
0.0466479	0.176896	0.0672419	0.194955	0.579903	0.681517	2.56529	0.708153	1.30806	2.90726	0.0971552	4.00828	1.52721	0.14129	0.0477162	1.32796	2.00408	0.267463	0.523031	3.24878	3.23043	0.454637	0.454025	0.850734	3.49528	3.71747	5.39763	3.78476	4.31784	4.70433	2.97116	1.86883
0.118203	0.651005	0.428244	0.6387	1.21822	1.41906	2.67239	1.54757	1.49812	2.04147	0.57793	3.35136	1.92824	0.0338811	0.011161	1.81504	2.62584	2.01059	0.785127	3.17149	3.47947	1.74039	1.47882	0.513839	3.40753	4.48157	4.63587	3.53649	5.11325	5.01578	2.31786	5.02478
0.113244	0.749638	0.198885	0.589815	1.60503	2.16228	3.81417	1.93161	2.31977	2.6814	0.591618	4.2573	2.23276	0	0	2.08717	4.40963	1.32421	1.18393	4.82793	3.30242	1.71926	2.58719	1.39232	4.69808	5.86938	6.0333	5.37151	3.86708	6.39012	4.62753	4.77904
0.0333304	0.49658	0.0524404	0.185491	0.453922	1.11438	1.4941	0.94449	0.956285	1.722	0.199917	4.03414	0.990155	0.0416223	0	1.0637	2.09328	0.911328	0.457259	2.66832	3.83961	1.44441	0.112282	0.340264	4.8879	3.52144	4.7228	2.49919	0.871466	4.79662	2.16269	3.08728
0.0541705	0.037083	0.0116104	0.109181	0.507698	0.509155	1.7327	0.105243	0.821775	0.538653	0.196601	3.55667	2.07353	0.0273913	0.0179631	0.959737	0.999671	0.313652	0.183547	2.95756	2.76839	0.0448936	0.681859	0.442142	2.32926	3.5606	4.18616	3.11779	3.63094	5.68413	1.22294	7.98904
0.0640357	0.0486781	0.0453715	0.0930321	0.263926	0.206803	2.57304	0.238214	1.14339	0.347478	0.174125	3.7006	3.09173	0	0	1.58145	2.02881	0.201677	0.445832	3.77555	3.02036	0.122372	0.59782	0.634675	5.22856	6.27875	7.14941	4.77436	5.04498	7.58436	2.25194	3.13399

## Sheet: corrdata
gene	ADORA2A	BTLA	CD160	CD244	CD274	CD96	CSF1R	CTLA4	HAVCR2	IDO1	IL10	IL10RB	KDR	KIR2DL1	KIR2DL3	LAG3	LGALS9	PDCD1	PDCD1LG2	TGFB1	TGFBR1	TIGIT	VTCN1
Riskscore	0.223506	0.198316	0.0117482	0.106335	0.0805004	0.186942	0.317308	0.338748	0.492477	0.232017	0.225666	-0.107814	0.0447256	0.0993717	0.0622145	0.147817	0.37004	0.221381	0.174044	0.554297	0.166297	0.254396	0.0483202
MYLK	0.0816746	0.216511	0.364926	0.352332	0.342499	0.341063	0.43664	0.0484547	0.185262	0.00473941	0.231064	0.0874396	0.571055	0.0875071	-0.00201081	0.175904	0.24309	0.171465	0.462685	0.341149	0.360294	0.206249	0.366044
FBLN1	0.0666008	0.314418	0.221886	0.425324	0.349881	0.437648	0.558957	0.314146	0.394186	0.110377	0.349102	0.12692	0.442729	0.0897977	0.0147809	0.357022	0.488324	0.386036	0.576509	0.566747	0.276801	0.376705	0.348444
PTGDS	0.0468221	0.237696	0.226516	0.390806	0.238233	0.358067	0.357596	0.229468	0.210474	0.0806966	0.142564	0.289137	0.221158	0.122453	0.0583705	0.464484	0.442606	0.392633	0.402125	0.42628	0.0352814	0.274267	0.425553
TGFB1	0.258093	0.417289	0.297374	0.524829	0.450801	0.567108	0.727967	0.5057	0.730535	0.325728	0.480778	0.079166	0.441535	0.188001	0.134957	0.471544	0.761841	0.542512	0.602046	1	0.331676	0.523191	0.448588
MXRA8	0.197417	0.289388	0.159834	0.360296	0.282374	0.369499	0.527201	0.447416	0.554455	0.172754	0.284429	0.0594515	0.275127	0.14928	0.0583213	0.514274	0.675773	0.422791	0.456357	0.789943	0.208233	0.391582	0.297684
PTN	-0.0454394	0.104904	0.138324	0.245614	0.256903	0.207333	0.182332	0.0713025	0.0951126	0.0498315	0.0931174	0.0484906	0.233868	0.0345717	-0.00783826	0.198802	0.177043	0.155274	0.270464	0.14151	0.11561	0.129343	0.120367
COL1A1	0.238427	0.299492	0.187065	0.227842	0.295829	0.348821	0.583309	0.305175	0.597583	0.187783	0.391277	-0.164874	0.454595	0.0944565	0.0253653	0.152225	0.465353	0.233497	0.518745	0.707589	0.455066	0.33481	0.154732
THBS2	0.201806	0.419421	0.223701	0.313535	0.347648	0.440079	0.630779	0.361722	0.640151	0.276903	0.440067	-0.0876456	0.426581	0.0863554	0.0505049	0.108502	0.456003	0.257588	0.559984	0.629272	0.604759	0.415268	0.197553
MT1E	-0.0938002	-0.0201381	0.0264003	0.0730225	0.125798	0.00686516	-0.00713095	-0.0497921	-0.0302032	-0.0611369	0.0364802	0.0611613	0.0356365	-0.0362529	0.016697	0.135065	0.103935	0.00712249	0.0683162	-0.00324104	-0.00247389	-0.0170466	0.0753747

## Sheet: corrp
gene	ADORA2A	BTLA	CD160	CD244	CD274	CD96	CSF1R	CTLA4	HAVCR2	IDO1	IL10	IL10RB	KDR	KIR2DL1	KIR2DL3	LAG3	LGALS9	PDCD1	PDCD1LG2	TGFB1	TGFBR1	TIGIT	VTCN1
Riskscore	0.01944	0.052125	0.9284	0.43716	0.38706	0.1003	0.0067459	0.0036854	1.5999e-05	0.027054	0.014479	0.07765	0.83988	0.59922	0.71364	0.46234	0.0040335	0.089376	0.11452	1.5616e-05	0.077228	0.022378	0.84679
MYLK	0.24705	0.77295	0.075515	0.27212	0.19039	0.68774	0.1493	0.1122	0.69242	0.085418	0.89447	0.77137	3.7323e-05	0.27324	0.070696	0.81565	0.88261	0.5841	0.037526	0.60546	0.10399	0.59734	0.021229
FBLN1	0.26322	0.49953	0.39372	0.042151	0.11106	0.16472	0.0088126	0.7861	0.22464	0.50781	0.27224	0.98916	0.0020678	0.24654	0.058172	0.10855	0.020108	0.24192	0.0023534	0.010056	0.21084	0.40378	0.0112
PTGDS	0.11422	0.97313	0.54517	0.084236	0.67348	0.50655	0.54259	0.86531	0.55969	0.32288	0.5484	0.035422	0.49715	0.59788	0.30507	0.0097794	0.14553	0.20378	0.30798	0.47682	0.22346	0.91683	0.0026311
TGFB1	0.15564	0.0082144	0.28616	0.0028266	0.010094	0.0015339	8.2103e-09	0.0012008	1.161e-09	0.063942	0.00042074	0.13705	0.017757	0.74564	0.45872	0.013264	7.4041e-10	0.0021824	1.9378e-05	0	0.013622	0.0013428	0.015435
MXRA8	0.42766	0.18533	0.8699	0.11177	0.27886	0.099366	0.00031	0.021078	6.9083e-05	0.51672	0.061947	0.29709	0.12679	0.73245	0.24706	0.0092329	1.6754e-06	0.03156	0.0067115	1.5327e-13	0.18974	0.058564	0.11704
PTN	0.029325	0.37685	0.74487	0.62738	0.63487	0.74713	0.63553	0.12757	0.092263	0.13508	0.33734	0.54932	0.23256	0.29538	0.1895	0.63943	0.61051	0.66158	0.63731	0.22347	0.63456	0.35118	0.40263
COL1A1	0.11911	0.11888	0.63776	0.39174	0.092926	0.10977	1.9464e-05	0.10365	2.9444e-06	0.35365	0.0039611	0.0011403	0.0012046	0.58605	0.26127	0.93488	0.0030327	0.41544	0.00072669	4.2625e-09	9.2626e-05	0.082224	0.7582
THBS2	0.09138	0.013725	0.34275	0.15056	0.025342	0.019441	1.6662e-06	0.027126	7.1625e-08	0.072741	0.000296	0.0028822	0.0033149	0.60885	0.4222	0.84843	0.0022086	0.21783	0.00013184	1.314e-07	1.4255e-06	0.013067	0.66152
MT1E	0.0091115	0.057424	0.49181	0.48376	0.54951	0.11141	0.045255	0.024916	0.0058242	0.035003	0.07149	0.33657	0.75444	0.21397	0.40146	0.97317	0.17302	0.17466	0.2469	0.01184	0.11675	0.05235	0.88331
