# Supplementary material for: Single-cell RNA combined with bulk RNA analysis to explore oxidative stress and energy metabolism factors and found a new prostate cancer oncogene MXRA8
Source: Aging (Albany NY). 2024 Mar 4;16(5):4469–502. doi: 10.18632/aging.205599 (PMC10968713; doi:10.18632/aging.205599)
Supplement: Supplementary Table 8 [file aging-16-205599-s009.xlsx]

## Sheet: Hallmark_GSVA
Supplementary Table 8. Analysis results of ssGSEA enrichment in Hallmark gene set.
sample	ADIPOGENESIS	ALLOGRAFT_REJECTION	ANDROGEN_RESPONSE	ANGIOGENESIS	APICAL_JUNCTION	APICAL_SURFACE	APOPTOSIS	BILE_ACID_METABOLISM	CHOLESTEROL_HOMEOSTASIS	COAGULATION	COMPLEMENT	DNA_REPAIR	E2F_TARGETS	EPITHELIAL_MESENCHYMAL_TRANSITION	ESTROGEN_RESPONSE_EARLY	ESTROGEN_RESPONSE_LATE	FATTY_ACID_METABOLISM	G2M_CHECKPOINT	GLYCOLYSIS	HEDGEHOG_SIGNALING	HEME_METABOLISM	HYPOXIA	IL2_STAT5_SIGNALING	IL6_JAK_STAT3_SIGNALING	INFLAMMATORY_RESPONSE	INTERFERON_ALPHA_RESPONSE	INTERFERON_GAMMA_RESPONSE	KRAS_SIGNALING_DN	KRAS_SIGNALING_UP	MITOTIC_SPINDLE	MTORC1_SIGNALING	MYC_TARGETS_V1	MYC_TARGETS_V2	MYOGENESIS	NOTCH_SIGNALING	OXIDATIVE_PHOSPHORYLATION	P53_PATHWAY	PANCREAS_BETA_CELLS	PEROXISOME	PI3K_AKT_MTOR_SIGNALING	PROTEIN_SECRETION	REACTIVE_OXYGEN_SPECIES_PATHWAY	SPERMATOGENESIS	TGF_BETA_SIGNALING	TNFA_SIGNALING_VIA_NFKB	UNFOLDED_PROTEIN_RESPONSE	UV_RESPONSE_DN	UV_RESPONSE_UP	WNT_BETA_CATENIN_SIGNALING
TCGA-2A-A8VL-01A	0.523438	0.187412	0.694847	0.24216	0.305555	0.206681	0.445744	0.244291	0.577068	0.194768	0.21778	0.473517	0.251798	0.307951	0.335592	0.322636	0.498591	0.25042	0.405706	0.145812	0.298903	0.406604	0.241451	0.137715	0.0937745	0.47627	0.371776	-0.127794	0.145108	0.298444	0.548182	0.687054	0.425456	0.249685	0.403623	0.691428	0.449019	-0.0284867	0.446112	0.448399	0.580425	0.559921	-0.0946706	0.50149	0.370792	0.56787	0.320503	0.442941	0.272927
TCGA-2A-A8VO-01A	0.514965	0.205404	0.651364	0.277796	0.310607	0.14365	0.444514	0.209894	0.519661	0.282989	0.266885	0.492509	0.289988	0.337561	0.340351	0.326734	0.493436	0.273849	0.385465	0.0765049	0.309219	0.364544	0.242165	0.185142	0.123211	0.473766	0.397977	-0.161843	0.199707	0.301984	0.525354	0.703736	0.490604	0.401471	0.370043	0.688946	0.438523	-0.112817	0.424895	0.459987	0.55349	0.551181	-0.122113	0.458096	0.338648	0.560905	0.316975	0.428638	0.211931
TCGA-2A-A8VT-01A	0.478043	0.214259	0.659388	0.274014	0.302394	0.113588	0.402226	0.190656	0.492713	0.160446	0.20564	0.475834	0.320817	0.267892	0.307874	0.270409	0.450037	0.310508	0.37093	0.183397	0.285485	0.323962	0.223956	0.159308	0.110562	0.587776	0.438901	-0.150086	0.147599	0.357555	0.52033	0.706412	0.477569	0.181608	0.426869	0.662812	0.419384	-0.0322196	0.407608	0.457391	0.582038	0.51251	-0.0775628	0.515628	0.309708	0.559355	0.331872	0.413051	0.28895
TCGA-2A-A8VV-01A	0.519502	0.162125	0.651648	0.282113	0.302841	0.147864	0.389144	0.220249	0.507636	0.206489	0.187461	0.482715	0.296882	0.333552	0.333409	0.319886	0.48629	0.287163	0.382894	0.12737	0.284134	0.345343	0.225101	0.087066	0.0633326	0.372973	0.295343	-0.1653	0.119364	0.325464	0.526217	0.713593	0.476828	0.260906	0.400321	0.695863	0.392702	-0.0218428	0.433953	0.462733	0.56542	0.545075	-0.0982483	0.470646	0.239102	0.547566	0.333431	0.390797	0.27276
TCGA-2A-A8VX-01A	0.50201	0.111964	0.626293	0.180535	0.248116	0.0713037	0.374713	0.193273	0.508781	0.163085	0.163213	0.50239	0.371925	0.282301	0.318958	0.317733	0.471655	0.352058	0.369308	0.108531	0.293132	0.317849	0.211461	0.0633715	0.0320371	0.34588	0.277374	-0.176878	0.044953	0.315765	0.543922	0.722907	0.512411	0.241912	0.326237	0.69213	0.402144	-0.135775	0.416175	0.468292	0.550361	0.53021	-0.0788	0.446306	0.257236	0.564959	0.292014	0.392891	0.259756
TCGA-2A-A8W1-01A	0.506231	0.123982	0.676102	0.212031	0.227142	0.0985449	0.346979	0.20875	0.498976	0.123722	0.156213	0.49612	0.349692	0.175661	0.292737	0.27672	0.501039	0.324334	0.364106	0.100484	0.290751	0.312747	0.195591	0.0852988	0.0596904	0.36125	0.2788	-0.19239	0.106625	0.313441	0.545619	0.727482	0.528072	0.122543	0.32539	0.737927	0.394967	-0.115821	0.432713	0.468743	0.583141	0.535894	-0.0759156	0.425266	0.288736	0.601283	0.25485	0.408671	0.188796
TCGA-2A-A8W3-01A	0.515018	0.183244	0.690077	0.345584	0.320807	0.163162	0.402474	0.182255	0.472233	0.207137	0.221721	0.470524	0.35518	0.344168	0.335101	0.30371	0.47037	0.33458	0.390824	0.181207	0.308248	0.367342	0.2357	0.125732	0.0975	0.42237	0.350062	-0.170347	0.180468	0.362451	0.540218	0.724541	0.513401	0.227834	0.413335	0.684774	0.430938	-0.0578156	0.410629	0.464995	0.56935	0.520048	-0.119584	0.504747	0.318186	0.600497	0.359492	0.411777	0.300395
TCGA-2A-AAYF-01A	0.511639	0.15944	0.671087	0.238808	0.286311	0.144071	0.410065	0.227919	0.519056	0.194699	0.209755	0.486457	0.280564	0.282099	0.333128	0.308634	0.506016	0.271377	0.393109	0.111226	0.310186	0.339675	0.220417	0.140553	0.0857721	0.435801	0.347725	-0.179793	0.13804	0.310371	0.532868	0.699787	0.481952	0.220921	0.379069	0.694667	0.406972	-0.100448	0.435798	0.456101	0.586381	0.547661	-0.103482	0.449832	0.285832	0.5712	0.302745	0.417226	0.22405
TCGA-2A-AAYO-01A	0.518596	0.325491	0.633718	0.241691	0.321602	0.205354	0.460218	0.211979	0.499707	0.249662	0.283339	0.490065	0.294159	0.346376	0.326664	0.318157	0.496544	0.276645	0.395477	0.104771	0.304227	0.370956	0.301312	0.28868	0.156164	0.560968	0.472995	-0.18272	0.226401	0.298675	0.532467	0.701058	0.471308	0.298422	0.36093	0.69069	0.43867	-0.117733	0.420358	0.475048	0.553386	0.567216	-0.120584	0.453872	0.345911	0.558079	0.32502	0.444922	0.227081
TCGA-2A-AAYU-01A	0.504696	0.155891	0.654602	0.285138	0.31467	0.112859	0.392681	0.213942	0.511969	0.20929	0.196296	0.482926	0.297274	0.3385	0.332415	0.316005	0.478663	0.286493	0.379074	0.155345	0.296904	0.347798	0.222264	0.109921	0.0627296	0.429912	0.323999	-0.145893	0.123255	0.335118	0.530092	0.712622	0.458864	0.286798	0.393327	0.681381	0.399145	-0.0486472	0.421281	0.450292	0.58272	0.524829	-0.0904296	0.45899	0.284001	0.567009	0.327739	0.403504	0.243329
TCGA-4L-AA1F-01A	0.512391	0.389638	0.611772	0.52788	0.396155	0.204583	0.525249	0.174354	0.554764	0.352711	0.377896	0.465764	0.337941	0.628672	0.341899	0.346184	0.466835	0.320149	0.432747	0.227062	0.306232	0.460354	0.371977	0.344293	0.289611	0.608956	0.535271	-0.186176	0.343861	0.366401	0.567147	0.693619	0.414055	0.290167	0.527267	0.660367	0.484353	-0.0491244	0.413276	0.469562	0.57841	0.566637	-0.14175	0.584407	0.515657	0.56139	0.410428	0.458454	0.363344
TCGA-CH-5737-01A	0.521963	0.167197	0.688541	0.294743	0.296605	0.150322	0.437217	0.233837	0.556488	0.240602	0.232319	0.472814	0.296148	0.290021	0.371818	0.357205	0.480278	0.285822	0.431455	0.176844	0.317669	0.388898	0.25605	0.170116	0.112065	0.394839	0.335942	-0.13878	0.152031	0.322185	0.554247	0.687044	0.458515	0.185391	0.437873	0.680793	0.447967	-0.0607324	0.458263	0.451302	0.597395	0.560004	-0.104351	0.497207	0.372711	0.580303	0.3151	0.417238	0.244744
TCGA-CH-5738-01A	0.521266	0.321774	0.684567	0.38233	0.34808	0.190096	0.514412	0.211738	0.513183	0.342422	0.347426	0.442166	0.287073	0.43453	0.392786	0.379332	0.479879	0.284974	0.417949	0.146572	0.309	0.439148	0.33188	0.309417	0.259933	0.486501	0.460084	-0.158987	0.302538	0.327907	0.545974	0.689486	0.451526	0.255423	0.444708	0.649029	0.487559	-0.0855239	0.422651	0.46408	0.599733	0.556787	-0.130352	0.558606	0.52987	0.577313	0.387777	0.435888	0.269655
TCGA-CH-5739-01A	0.521277	0.284105	0.699752	0.347792	0.307904	0.162813	0.474624	0.218782	0.495059	0.249962	0.27559	0.453846	0.312644	0.400144	0.350207	0.329021	0.466262	0.305091	0.404754	0.143269	0.298424	0.414482	0.283878	0.228633	0.181326	0.517062	0.443033	-0.164214	0.216481	0.344491	0.544552	0.701133	0.480191	0.230489	0.426707	0.65753	0.45133	-0.0439628	0.418803	0.464939	0.603056	0.535003	-0.114603	0.549889	0.427405	0.573073	0.384751	0.422418	0.268714
TCGA-CH-5740-01A	0.519638	0.264738	0.664348	0.25269	0.283002	0.138207	0.449017	0.234315	0.527281	0.220708	0.252927	0.489936	0.339954	0.313176	0.339819	0.342104	0.515536	0.317033	0.409849	0.143667	0.297437	0.360538	0.250915	0.209292	0.0993814	0.495172	0.412026	-0.155229	0.177582	0.335892	0.550502	0.72657	0.488855	0.19279	0.373513	0.696988	0.439382	0.0207889	0.453887	0.457088	0.596687	0.54727	-0.0865058	0.489681	0.332345	0.562516	0.322303	0.432483	0.239134
TCGA-CH-5741-01A	0.505926	0.156723	0.65489	0.28932	0.268403	0.109208	0.392609	0.201112	0.502772	0.202005	0.18799	0.481685	0.318672	0.254418	0.313829	0.308021	0.481978	0.289497	0.410846	0.14623	0.294103	0.360991	0.232661	0.12296	0.0712158	0.365638	0.291071	-0.150992	0.128105	0.312725	0.553795	0.713943	0.46275	0.155735	0.37312	0.687649	0.42235	-0.0243437	0.429081	0.446123	0.594892	0.517308	-0.0709548	0.491178	0.318257	0.592042	0.311378	0.39818	0.259219
TCGA-CH-5743-01A	0.513235	0.319406	0.656552	0.321706	0.364767	0.28882	0.53986	0.201974	0.491011	0.278233	0.350358	0.464499	0.296025	0.375367	0.407391	0.399592	0.449136	0.28304	0.404268	0.162827	0.314452	0.453685	0.320776	0.31905	0.258447	0.551926	0.504353	-0.0932528	0.290343	0.331177	0.532804	0.691765	0.41286	0.26671	0.474968	0.652297	0.532076	-0.0309483	0.4245	0.465451	0.591204	0.532971	-0.120012	0.580997	0.562554	0.55774	0.373686	0.451931	0.309801
TCGA-CH-5744-01A	0.50808	0.245496	0.672904	0.332866	0.311719	0.160159	0.469511	0.233601	0.52618	0.224513	0.245096	0.46257	0.301779	0.319503	0.362772	0.347754	0.474471	0.295023	0.419267	0.198915	0.295845	0.40154	0.270782	0.219873	0.163108	0.478933	0.402446	-0.131397	0.192511	0.335443	0.544175	0.689339	0.455707	0.216185	0.455088	0.665862	0.479623	-9.45541e-05	0.449777	0.454529	0.569105	0.550195	-0.0994515	0.520392	0.450921	0.589328	0.314674	0.431832	0.306079
TCGA-CH-5745-01A	0.507963	0.294904	0.672235	0.312854	0.342123	0.225348	0.50289	0.22585	0.504868	0.296951	0.315845	0.449195	0.248733	0.391187	0.395726	0.3753	0.480381	0.250259	0.423634	0.190784	0.315617	0.441331	0.287357	0.242011	0.196241	0.543882	0.470822	-0.147681	0.24166	0.320461	0.525572	0.672594	0.438758	0.259745	0.447427	0.633187	0.483732	-0.0695798	0.434853	0.465331	0.590829	0.541267	-0.140721	0.555951	0.449191	0.567795	0.365936	0.435374	0.285573
TCGA-CH-5746-01A	0.514023	0.173178	0.687427	0.25616	0.314772	0.188517	0.436981	0.223717	0.506486	0.216418	0.226236	0.464557	0.313971	0.288524	0.364694	0.344759	0.480392	0.308015	0.397873	0.153762	0.301655	0.369498	0.23155	0.151099	0.092659	0.415942	0.33891	-0.131732	0.162374	0.340167	0.534236	0.712282	0.459921	0.226249	0.433277	0.67117	0.436931	-0.043444	0.445395	0.456827	0.601825	0.534601	-0.11052	0.502301	0.341295	0.577863	0.348875	0.40344	0.289828
TCGA-CH-5748-01A	0.511926	0.202346	0.709962	0.203127	0.292217	0.148802	0.406147	0.243126	0.522013	0.206062	0.229066	0.467647	0.339814	0.257656	0.359564	0.33038	0.493246	0.334413	0.385226	0.108626	0.320301	0.319369	0.219941	0.155428	0.0895667	0.476209	0.39903	-0.157092	0.155618	0.344358	0.554857	0.70829	0.48522	0.197613	0.382391	0.674231	0.412556	-0.0657416	0.444052	0.466103	0.617055	0.541325	-0.0971346	0.439564	0.261591	0.579035	0.327205	0.40449	0.224541
TCGA-CH-5750-01A	0.503012	0.304045	0.698804	0.298271	0.299856	0.140006	0.4647	0.240558	0.530684	0.221501	0.287658	0.472275	0.386398	0.319217	0.345346	0.334465	0.475707	0.377442	0.400471	0.110186	0.312548	0.371002	0.286351	0.258833	0.184439	0.53835	0.465053	-0.164841	0.225736	0.364426	0.569543	0.73173	0.51328	0.178137	0.388945	0.670522	0.444998	-0.0757748	0.428095	0.477397	0.597526	0.556882	-0.096179	0.513979	0.442049	0.596439	0.335061	0.433091	0.223696
TCGA-CH-5751-01A	0.479336	0.43229	0.669822	0.348802	0.321871	0.163297	0.476044	0.193263	0.465891	0.200995	0.295948	0.478574	0.507274	0.357773	0.292862	0.284147	0.443128	0.485351	0.367335	0.153665	0.311839	0.353064	0.339549	0.317461	0.230606	0.626599	0.541024	-0.197105	0.229029	0.431206	0.565885	0.747269	0.517136	0.162815	0.412625	0.643462	0.419718	-0.0750636	0.39072	0.488369	0.565213	0.523822	-0.0635581	0.540604	0.4003	0.572805	0.358555	0.434377	0.230759
TCGA-CH-5752-01A	0.509928	0.169788	0.671031	0.346836	0.283942	0.0839545	0.373879	0.177331	0.468971	0.189435	0.179083	0.482764	0.406032	0.339216	0.284858	0.269023	0.455882	0.402416	0.403314	0.163099	0.287364	0.359128	0.225345	0.127247	0.0837658	0.311187	0.263802	-0.192057	0.126033	0.407645	0.563814	0.7394	0.52361	0.202277	0.380717	0.678337	0.371015	-0.0887863	0.405577	0.445804	0.586712	0.510475	-0.0806181	0.514546	0.313764	0.584194	0.364825	0.37572	0.255453
TCGA-CH-5753-01A	0.46287	0.266029	0.697863	0.279403	0.301046	0.139838	0.473925	0.199353	0.483907	0.187795	0.276506	0.457385	0.331977	0.285017	0.339618	0.309878	0.446739	0.325261	0.385102	0.132532	0.300409	0.384895	0.27412	0.224938	0.199576	0.663366	0.519428	-0.137485	0.222293	0.362305	0.535497	0.697393	0.459702	0.148518	0.378083	0.634074	0.459278	0.00213738	0.431207	0.468637	0.618361	0.510743	-0.11252	0.547707	0.491047	0.598135	0.337329	0.426944	0.230118
TCGA-CH-5754-01A	0.515186	0.3633	0.654951	0.371412	0.338817	0.180831	0.485554	0.194199	0.532902	0.279364	0.339352	0.479104	0.41639	0.368931	0.357325	0.36996	0.475274	0.383965	0.422778	0.190792	0.300938	0.407024	0.309087	0.297438	0.204814	0.677077	0.569757	-0.138603	0.250922	0.372879	0.576647	0.722748	0.546616	0.226744	0.457387	0.6769	0.474499	-0.0429258	0.430183	0.470002	0.552427	0.55168	-0.0834147	0.510671	0.444319	0.590302	0.323482	0.472947	0.330782
TCGA-CH-5761-01A	0.5022	0.1742	0.670388	0.391087	0.306055	0.119624	0.423479	0.183412	0.548519	0.208037	0.233029	0.488355	0.50617	0.374239	0.324765	0.317554	0.464313	0.487166	0.411614	0.213679	0.29645	0.366925	0.243582	0.121585	0.0974147	0.543432	0.401043	-0.192858	0.15245	0.42464	0.589431	0.744968	0.556548	0.192471	0.389678	0.641535	0.420052	-0.101915	0.412813	0.476642	0.574373	0.529132	-0.0376693	0.502179	0.292783	0.588107	0.337067	0.417887	0.297685
TCGA-CH-5762-01A	0.514209	0.296064	0.691285	0.346565	0.336453	0.211375	0.506022	0.186584	0.486974	0.259577	0.303323	0.454009	0.323925	0.393965	0.371476	0.360837	0.463392	0.328752	0.385844	0.146096	0.312101	0.416021	0.319402	0.269563	0.210113	0.485327	0.448138	-0.141333	0.261176	0.344163	0.546454	0.712643	0.484234	0.256026	0.425725	0.650095	0.467704	-0.0740552	0.424074	0.472754	0.602682	0.529462	-0.103121	0.564303	0.494304	0.588992	0.403178	0.42923	0.270944
TCGA-CH-5763-01A	0.518508	0.230155	0.700136	0.379294	0.373241	0.252739	0.514832	0.236509	0.555692	0.285498	0.291126	0.435876	0.278814	0.482136	0.403301	0.384705	0.465199	0.286641	0.412604	0.179442	0.322421	0.459676	0.311462	0.224363	0.220139	0.470746	0.419665	-0.119826	0.274363	0.329376	0.553704	0.6755	0.405494	0.289679	0.425779	0.647568	0.4875	-0.0560722	0.447135	0.45629	0.615174	0.542646	-0.0996825	0.579669	0.517222	0.565377	0.426494	0.428653	0.280608
TCGA-CH-5764-01A	0.511134	0.251117	0.685568	0.305171	0.317391	0.169627	0.468641	0.208869	0.512813	0.226332	0.259957	0.457603	0.306761	0.333565	0.372552	0.333231	0.462616	0.309045	0.394776	0.148961	0.307116	0.392596	0.270445	0.210084	0.156974	0.476111	0.416079	-0.152377	0.206623	0.352205	0.542972	0.711796	0.482367	0.218796	0.425678	0.665768	0.450461	-0.013154	0.429905	0.471184	0.611483	0.52658	-0.10791	0.540006	0.42343	0.576617	0.38412	0.405701	0.273762
TCGA-CH-5765-01A	0.511885	0.163743	0.672521	0.278232	0.290324	0.155591	0.405271	0.196063	0.476036	0.19439	0.202396	0.463357	0.322214	0.279539	0.332824	0.301764	0.468325	0.315476	0.395854	0.152764	0.303774	0.356273	0.235701	0.143021	0.0953487	0.312518	0.277283	-0.16089	0.137778	0.361944	0.537313	0.71526	0.46294	0.202007	0.385793	0.671553	0.40118	-0.0123403	0.417505	0.461675	0.615708	0.514593	-0.093541	0.510078	0.323397	0.58714	0.357581	0.381578	0.276733
TCGA-CH-5766-01A	0.510748	0.249368	0.680015	0.290562	0.308818	0.155508	0.480856	0.219553	0.530214	0.231924	0.272775	0.447531	0.297056	0.312846	0.380005	0.35415	0.474246	0.296338	0.398684	0.152605	0.317119	0.394694	0.274177	0.214866	0.163089	0.513964	0.436003	-0.131353	0.202543	0.338975	0.56338	0.686081	0.44756	0.190645	0.432574	0.668204	0.462764	-0.0182075	0.42666	0.469235	0.603032	0.528373	-0.0867776	0.537916	0.457509	0.589415	0.33831	0.435304	0.249449
TCGA-CH-5767-01A	0.520843	0.154681	0.725153	0.277799	0.287188	0.139256	0.428	0.234575	0.548396	0.196262	0.20559	0.462191	0.308086	0.300951	0.376973	0.330892	0.500018	0.294319	0.41107	0.125994	0.31358	0.387178	0.232715	0.149247	0.127155	0.376367	0.319918	-0.168057	0.147776	0.316304	0.561565	0.687728	0.464757	0.218607	0.409315	0.685897	0.434137	-0.0903877	0.435104	0.463169	0.608061	0.543773	-0.105272	0.494021	0.404023	0.600646	0.341355	0.410694	0.217489
TCGA-CH-5768-01A	0.505155	0.199326	0.684834	0.228839	0.29356	0.13444	0.428961	0.219076	0.511298	0.202853	0.222127	0.474516	0.354118	0.273153	0.345107	0.329389	0.471507	0.347785	0.401975	0.117308	0.304678	0.353412	0.237644	0.164036	0.108313	0.441901	0.366507	-0.163696	0.161756	0.354148	0.547497	0.728407	0.522504	0.188368	0.406172	0.675726	0.433451	-0.0554262	0.432312	0.463456	0.599373	0.549549	-0.0988598	0.50832	0.327274	0.581542	0.328334	0.3894	0.260298
TCGA-CH-5769-01A	0.531723	0.256067	0.674205	0.357499	0.333753	0.185333	0.483993	0.201259	0.581917	0.27576	0.27852	0.4801	0.443934	0.405118	0.353318	0.369562	0.508682	0.425481	0.446619	0.146889	0.301814	0.430599	0.265031	0.208835	0.152487	0.465715	0.403189	-0.15629	0.218383	0.390483	0.592729	0.739308	0.523341	0.249709	0.407775	0.690162	0.465235	-0.0544516	0.420523	0.479396	0.590269	0.57427	-0.0770642	0.545247	0.423844	0.588082	0.347701	0.432332	0.267007
TCGA-CH-5771-01A	0.524541	0.302281	0.651601	0.387622	0.385406	0.24477	0.501193	0.217685	0.514043	0.297284	0.305517	0.447873	0.277115	0.45213	0.388668	0.366554	0.456715	0.276127	0.408812	0.168554	0.314094	0.435851	0.311548	0.253261	0.214597	0.52056	0.464846	-0.121878	0.263431	0.335532	0.527678	0.676529	0.433656	0.309077	0.479273	0.649591	0.490869	-0.034889	0.418232	0.463084	0.562924	0.557874	-0.136481	0.565109	0.451148	0.555585	0.394038	0.433539	0.31496
TCGA-CH-5772-01A	0.515143	0.208018	0.706814	0.334767	0.304541	0.15844	0.448196	0.229311	0.514821	0.205567	0.238088	0.473696	0.342335	0.317442	0.320083	0.302824	0.511907	0.330747	0.395703	0.165126	0.299728	0.363067	0.243372	0.174323	0.119686	0.498687	0.400292	-0.180369	0.195709	0.334727	0.554855	0.721655	0.469675	0.218444	0.388139	0.696044	0.423137	0.0434726	0.435516	0.468692	0.605364	0.518544	-0.0865229	0.530695	0.337071	0.577434	0.37576	0.421123	0.243159
TCGA-CH-5788-01A	0.502121	0.160816	0.697955	0.281084	0.28226	0.108294	0.392599	0.213566	0.520518	0.171898	0.195478	0.49538	0.466261	0.296471	0.349543	0.33069	0.492628	0.421788	0.422372	0.124612	0.311819	0.327115	0.240809	0.125527	0.0696134	0.403367	0.313621	-0.201471	0.130986	0.376907	0.591879	0.742604	0.576906	0.178499	0.365931	0.677448	0.402017	-0.0968247	0.431005	0.481891	0.588994	0.519588	-0.0554036	0.461477	0.252696	0.577452	0.317559	0.390071	0.241931
TCGA-CH-5789-01A	0.520672	0.237411	0.706218	0.311263	0.342364	0.231162	0.503438	0.234046	0.537178	0.272645	0.295127	0.438686	0.261651	0.364995	0.39808	0.370783	0.48308	0.2772	0.414227	0.184104	0.323927	0.433635	0.280454	0.238077	0.190484	0.44933	0.409274	-0.133414	0.231226	0.329508	0.557406	0.671906	0.405445	0.263131	0.435601	0.648695	0.462577	-0.0504661	0.436713	0.452519	0.631566	0.554545	-0.103357	0.559459	0.46577	0.584284	0.386515	0.419671	0.274755
TCGA-CH-5790-01A	0.493083	0.203094	0.68331	0.269151	0.299594	0.143557	0.435612	0.215954	0.522746	0.21833	0.236822	0.455342	0.279214	0.30776	0.349403	0.328358	0.467838	0.282706	0.39112	0.108025	0.307864	0.370349	0.241416	0.167545	0.12652	0.417747	0.341836	-0.145615	0.185858	0.340276	0.538115	0.696088	0.444897	0.187666	0.397449	0.653775	0.435423	-0.0426512	0.436898	0.475343	0.611211	0.539819	-0.103676	0.526975	0.352503	0.561068	0.344952	0.388762	0.266645
TCGA-CH-5791-01A	0.49251	0.221945	0.661767	0.324419	0.305951	0.148186	0.432333	0.193773	0.519535	0.22822	0.248326	0.466127	0.321918	0.335595	0.348387	0.329315	0.458412	0.31484	0.398849	0.16878	0.310236	0.340734	0.254256	0.184975	0.12482	0.479852	0.392488	-0.154245	0.196126	0.348617	0.55414	0.700067	0.462076	0.191598	0.438356	0.664872	0.422305	-0.00580022	0.430693	0.471076	0.588892	0.530163	-0.0964179	0.498154	0.299104	0.559966	0.340309	0.396093	0.26848
TCGA-CH-5792-01A	0.5262	0.326574	0.665597	0.379758	0.385049	0.250505	0.494778	0.222853	0.513695	0.334676	0.338246	0.456559	0.305134	0.431024	0.39989	0.376729	0.473656	0.291718	0.424749	0.191974	0.315487	0.413218	0.292004	0.30109	0.2157	0.527843	0.490554	-0.143193	0.272746	0.346187	0.538551	0.685796	0.448285	0.286511	0.471105	0.652686	0.476077	-0.0603502	0.426374	0.467893	0.575944	0.576949	-0.140974	0.536274	0.416205	0.556669	0.375857	0.442907	0.299196
TCGA-CH-5794-01A	0.513214	0.205957	0.649585	0.305204	0.306518	0.169457	0.429507	0.189402	0.514317	0.263262	0.248717	0.482736	0.353177	0.325881	0.363189	0.348567	0.468558	0.339683	0.424703	0.152386	0.31665	0.395143	0.242113	0.158986	0.112357	0.39675	0.347008	-0.145006	0.169043	0.356608	0.551873	0.718993	0.507709	0.213471	0.397192	0.674797	0.441394	-0.0110471	0.432621	0.455277	0.575572	0.567297	-0.0812637	0.49398	0.373991	0.58787	0.322586	0.410634	0.271268
TCGA-EJ-5494-01A	0.521308	0.224679	0.660362	0.352852	0.317118	0.165889	0.461228	0.236847	0.508007	0.233462	0.23849	0.474974	0.311732	0.342089	0.350393	0.325497	0.482181	0.307621	0.419202	0.202658	0.295613	0.404894	0.254418	0.200171	0.141431	0.477895	0.400833	-0.144118	0.243836	0.342739	0.539036	0.706177	0.497675	0.225694	0.415486	0.672466	0.471014	0.0538963	0.441916	0.460987	0.58667	0.53252	-0.100486	0.533633	0.405598	0.572399	0.365107	0.427004	0.317031
TCGA-EJ-5495-01A	0.530936	0.296577	0.699333	0.476913	0.366577	0.216031	0.478323	0.216157	0.49191	0.285937	0.298873	0.430416	0.324096	0.46103	0.353789	0.349224	0.471953	0.32229	0.403948	0.218828	0.314909	0.396595	0.308721	0.257029	0.196203	0.490397	0.443466	-0.155043	0.271151	0.375327	0.543521	0.694709	0.409146	0.262982	0.456355	0.669524	0.450226	0.0381693	0.430169	0.461947	0.617666	0.532631	-0.089724	0.576684	0.394139	0.552934	0.443777	0.398544	0.294413
TCGA-EJ-5496-01A	0.520075	0.189484	0.70724	0.25648	0.30273	0.159457	0.406585	0.232244	0.509932	0.18588	0.205397	0.45687	0.310238	0.280121	0.353945	0.322477	0.48938	0.309465	0.386294	0.151378	0.305031	0.354216	0.237476	0.138456	0.0768842	0.434832	0.339747	-0.140974	0.139402	0.348854	0.541513	0.709883	0.470221	0.20082	0.403435	0.679707	0.406296	-0.0142558	0.442331	0.463443	0.609484	0.534671	-0.0877208	0.482691	0.29399	0.57147	0.345389	0.380931	0.264785
TCGA-EJ-5497-01A	0.525199	0.231376	0.724123	0.351194	0.327383	0.194814	0.433645	0.246475	0.526728	0.256355	0.260606	0.43608	0.288897	0.377425	0.368139	0.351562	0.486136	0.289166	0.407838	0.209691	0.30708	0.395767	0.26799	0.169351	0.128581	0.427087	0.364399	-0.126811	0.210226	0.346219	0.555464	0.689892	0.429728	0.236854	0.443074	0.656578	0.421419	0.0195565	0.443556	0.465154	0.629462	0.52404	-0.10534	0.522303	0.355094	0.568573	0.398048	0.396644	0.270829
TCGA-EJ-5498-01A	0.534368	0.24868	0.717296	0.406159	0.373772	0.262039	0.502339	0.230367	0.544268	0.272039	0.297014	0.4231	0.277324	0.45704	0.38984	0.371291	0.470924	0.281084	0.41925	0.205751	0.31596	0.447809	0.294362	0.224159	0.191618	0.490084	0.424086	-0.110686	0.275246	0.3376	0.54857	0.686639	0.41002	0.301422	0.453916	0.659391	0.471057	0.0276556	0.44174	0.465004	0.61849	0.536827	-0.0965312	0.574393	0.450086	0.55277	0.448419	0.41661	0.262769
TCGA-EJ-5499-01A	0.525373	0.282885	0.658894	0.29656	0.324178	0.196793	0.459174	0.212885	0.486002	0.2544	0.279922	0.48741	0.406472	0.357773	0.359341	0.348632	0.476706	0.391948	0.409845	0.146745	0.312699	0.374822	0.278803	0.24307	0.153762	0.485314	0.436124	-0.147165	0.216503	0.3686	0.560609	0.744479	0.506018	0.221066	0.42693	0.695827	0.454226	0.00555983	0.456928	0.480863	0.59754	0.552323	-0.0706116	0.520373	0.349956	0.569049	0.356223	0.42074	0.28622
TCGA-EJ-5501-01A	0.512836	0.201208	0.651224	0.318772	0.352139	0.199025	0.451407	0.209702	0.525418	0.25163	0.252132	0.466221	0.318987	0.37781	0.37289	0.354648	0.47295	0.306678	0.421828	0.205658	0.309359	0.400033	0.243943	0.176776	0.126705	0.479553	0.400846	-0.119797	0.193446	0.349924	0.545644	0.698448	0.486035	0.27348	0.432936	0.661628	0.462028	0.00669917	0.421935	0.456196	0.588264	0.547515	-0.109019	0.51736	0.353681	0.573708	0.363074	0.43351	0.281945
TCGA-EJ-5502-01A	0.517866	0.275224	0.689178	0.324702	0.380211	0.227849	0.475029	0.217868	0.512546	0.321097	0.320877	0.436192	0.267768	0.401389	0.387983	0.374421	0.479308	0.274274	0.415359	0.183553	0.310631	0.417378	0.28848	0.266863	0.18437	0.500366	0.454801	-0.108137	0.25157	0.341367	0.532553	0.672025	0.417332	0.447194	0.470458	0.642486	0.470756	-0.0666859	0.424371	0.46953	0.590516	0.548529	-0.141425	0.536568	0.418703	0.564272	0.382921	0.429457	0.293485
TCGA-EJ-5503-01A	0.533135	0.234352	0.688262	0.314561	0.366897	0.282794	0.457563	0.233196	0.529232	0.277697	0.28107	0.4542	0.272977	0.379175	0.388908	0.380265	0.477296	0.271035	0.421144	0.184553	0.311798	0.425445	0.268037	0.205529	0.133638	0.472686	0.408453	-0.100455	0.222317	0.338225	0.537273	0.675095	0.415321	0.287991	0.477995	0.662379	0.450255	-0.0307981	0.443277	0.458261	0.58453	0.553675	-0.112495	0.523366	0.376457	0.553377	0.374742	0.418068	0.301491
TCGA-EJ-5504-01A	0.534516	0.210849	0.695618	0.35172	0.328247	0.149714	0.428953	0.242112	0.532482	0.244259	0.243303	0.455063	0.331007	0.403508	0.355135	0.336694	0.484363	0.323662	0.405206	0.146581	0.313372	0.359919	0.255179	0.178482	0.133614	0.447418	0.389043	-0.166114	0.194572	0.339489	0.559121	0.705205	0.465316	0.235995	0.427224	0.677933	0.414431	-0.0138194	0.433919	0.460448	0.612456	0.534016	-0.100827	0.512426	0.306936	0.574548	0.392725	0.401652	0.236729
TCGA-EJ-5505-01A	0.532451	0.151251	0.732289	0.228176	0.310666	0.190343	0.401983	0.267249	0.554669	0.173905	0.194306	0.456703	0.316338	0.270622	0.358789	0.335506	0.499877	0.313627	0.384711	0.141582	0.319105	0.343614	0.209263	0.106729	0.0653265	0.407828	0.318031	-0.138133	0.137651	0.340848	0.557715	0.698626	0.43933	0.212696	0.410711	0.681486	0.412539	-0.0543976	0.46672	0.46154	0.618679	0.538708	-0.0855738	0.459637	0.25242	0.558653	0.37286	0.388465	0.220643
TCGA-EJ-5506-01A	0.514906	0.176751	0.707866	0.228015	0.329601	0.239094	0.419893	0.245683	0.538501	0.179037	0.214804	0.450752	0.291135	0.311228	0.351745	0.342548	0.48026	0.292068	0.383326	0.138869	0.317486	0.379997	0.230382	0.127474	0.111443	0.508218	0.392012	-0.110191	0.171515	0.345697	0.532268	0.682782	0.395909	0.231311	0.384522	0.66354	0.434822	-0.0132406	0.449138	0.460691	0.633073	0.527973	-0.102004	0.533246	0.305746	0.547991	0.37677	0.396118	0.238906
TCGA-EJ-5507-01A	0.511572	0.257735	0.647162	0.317826	0.308543	0.135722	0.433522	0.228342	0.550944	0.255156	0.275268	0.465331	0.347289	0.351787	0.316532	0.32103	0.495301	0.338562	0.396963	0.100833	0.308169	0.341675	0.259974	0.190331	0.118165	0.52349	0.439712	-0.161874	0.197196	0.341466	0.575479	0.711634	0.433663	0.191982	0.420195	0.664876	0.400442	-0.0468882	0.449211	0.471971	0.619429	0.554014	-0.0781334	0.503228	0.296259	0.565491	0.329905	0.413319	0.242214
TCGA-EJ-5508-01A	0.51222	0.278983	0.719856	0.346751	0.344343	0.214339	0.442846	0.218718	0.50277	0.267611	0.287054	0.442544	0.316313	0.368676	0.365633	0.348457	0.477135	0.316581	0.389339	0.180456	0.311356	0.38921	0.274743	0.218756	0.175787	0.463701	0.425117	-0.146595	0.246524	0.357915	0.542538	0.706666	0.430923	0.227011	0.43009	0.652281	0.431924	0.00220236	0.43884	0.465739	0.629349	0.534686	-0.0987684	0.536683	0.381629	0.571385	0.405202	0.40657	0.278256
TCGA-EJ-5509-01A	0.533204	0.267786	0.674961	0.336395	0.357124	0.21371	0.447216	0.248027	0.521502	0.277323	0.285927	0.465971	0.312007	0.400294	0.38384	0.368534	0.470421	0.297178	0.403715	0.151706	0.321435	0.376847	0.266646	0.221345	0.152571	0.506439	0.424079	-0.140868	0.216845	0.340798	0.539646	0.692493	0.477744	0.263689	0.46637	0.661864	0.449726	-0.0501866	0.431653	0.458675	0.568763	0.559343	-0.127884	0.497028	0.357798	0.558597	0.37789	0.423743	0.264564
TCGA-EJ-5510-01A	0.520462	0.267058	0.671343	0.31359	0.336545	0.213528	0.45265	0.221551	0.491087	0.26388	0.289434	0.460442	0.289152	0.364028	0.381657	0.36998	0.461025	0.284407	0.40684	0.199284	0.313506	0.395763	0.257517	0.200519	0.139955	0.531264	0.462786	-0.114417	0.234878	0.327675	0.531148	0.695876	0.446403	0.249549	0.435404	0.663011	0.4639	0.00438105	0.4441	0.466757	0.589412	0.545355	-0.116226	0.502591	0.361554	0.568809	0.375942	0.424309	0.244526
TCGA-EJ-5511-01A	0.508183	0.174203	0.663895	0.291608	0.326933	0.13928	0.419675	0.225185	0.468385	0.193573	0.218463	0.461658	0.270199	0.343524	0.356347	0.326763	0.464221	0.283214	0.372896	0.127859	0.310742	0.344423	0.2305	0.145483	0.0899911	0.454436	0.356045	-0.13546	0.152789	0.339224	0.516794	0.685026	0.471605	0.296528	0.389027	0.650232	0.416002	-0.0823077	0.409156	0.448461	0.59631	0.520232	-0.111584	0.517493	0.275792	0.568223	0.367771	0.391182	0.256487
TCGA-EJ-5512-01A	0.522229	0.187878	0.691845	0.239859	0.321002	0.219691	0.4315	0.224467	0.531231	0.225108	0.237654	0.470012	0.278259	0.324668	0.375248	0.357681	0.48596	0.273747	0.395335	0.135992	0.305119	0.382052	0.235321	0.160068	0.106049	0.478408	0.380161	-0.13256	0.175093	0.306598	0.537762	0.706506	0.444448	0.273058	0.419343	0.675143	0.427075	-0.0247347	0.436822	0.460587	0.604463	0.537713	-0.0959819	0.49501	0.325329	0.563631	0.375373	0.411483	0.25747
TCGA-EJ-5514-01A	0.515836	0.242439	0.645914	0.374874	0.324508	0.169275	0.445808	0.210775	0.528378	0.268835	0.27424	0.453864	0.392307	0.409617	0.347256	0.345185	0.470075	0.362532	0.423722	0.167723	0.309374	0.385582	0.265935	0.188196	0.157157	0.457484	0.404156	-0.18472	0.220739	0.377559	0.597049	0.7225	0.488555	0.255559	0.398058	0.641864	0.415392	-0.0881303	0.425658	0.453424	0.636207	0.540828	-0.0884472	0.551655	0.354147	0.589874	0.368393	0.402629	0.245782
TCGA-EJ-5515-01A	0.528039	0.175433	0.720896	0.261428	0.333477	0.238817	0.428376	0.254312	0.546323	0.180953	0.220305	0.435212	0.281326	0.335602	0.374146	0.339868	0.489587	0.289466	0.390895	0.146109	0.325207	0.386637	0.233442	0.140085	0.110771	0.454526	0.364237	-0.136769	0.1659	0.32841	0.551802	0.683981	0.370864	0.264232	0.409193	0.672882	0.417831	-0.0249827	0.444783	0.452292	0.641371	0.52983	-0.0905129	0.531625	0.310756	0.558412	0.39936	0.396107	0.22595
TCGA-EJ-5516-01A	0.526566	0.269259	0.729975	0.397455	0.337802	0.192933	0.479871	0.24405	0.521655	0.296559	0.323863	0.424942	0.303871	0.42621	0.359167	0.354192	0.492471	0.306986	0.407508	0.20475	0.319333	0.405681	0.28367	0.230678	0.183788	0.523851	0.457461	-0.141784	0.271736	0.356641	0.554617	0.68723	0.394189	0.231878	0.436497	0.657014	0.44566	-0.00139893	0.450226	0.455686	0.648346	0.532264	-0.0932772	0.56563	0.410205	0.566369	0.425389	0.415291	0.277485
TCGA-EJ-5517-01A	0.531417	0.236212	0.707346	0.320041	0.30747	0.187688	0.440342	0.234222	0.531231	0.234524	0.251765	0.451104	0.2857	0.351887	0.352859	0.334844	0.502028	0.28648	0.393151	0.142342	0.312595	0.386699	0.275077	0.196749	0.137657	0.443975	0.383613	-0.174455	0.200207	0.309101	0.567196	0.700787	0.441681	0.281981	0.381227	0.687819	0.409369	-0.05217	0.435206	0.473492	0.626144	0.542842	-0.109088	0.505686	0.344965	0.583159	0.394793	0.400529	0.205369
TCGA-EJ-5518-01A	0.545986	0.217469	0.693506	0.386523	0.343585	0.16606	0.45915	0.22245	0.555306	0.253223	0.260749	0.46099	0.348602	0.430702	0.370777	0.342121	0.499095	0.336314	0.426253	0.154715	0.31554	0.410552	0.269226	0.16709	0.133137	0.45916	0.389466	-0.126028	0.205328	0.372687	0.569608	0.70873	0.529972	0.425848	0.411196	0.6769	0.464948	-0.0804122	0.439356	0.457238	0.589369	0.55727	-0.113954	0.542283	0.36552	0.580131	0.379285	0.424911	0.279952
TCGA-EJ-5519-01A	0.494127	0.171526	0.704818	0.330563	0.313982	0.129505	0.395137	0.211353	0.51167	0.203978	0.205403	0.458085	0.337211	0.337138	0.34612	0.313882	0.452099	0.339387	0.376826	0.192258	0.306798	0.364042	0.226434	0.120572	0.104256	0.3986	0.331813	-0.164879	0.169749	0.366638	0.545893	0.697021	0.4737	0.217397	0.369833	0.639886	0.420924	-0.0751432	0.424777	0.47809	0.597488	0.532718	-0.0883182	0.484529	0.298085	0.595119	0.357702	0.39016	0.260769
TCGA-EJ-5521-01A	0.547256	0.232346	0.656138	0.332274	0.323794	0.181054	0.435965	0.247857	0.558698	0.289585	0.276851	0.476781	0.30002	0.346444	0.366115	0.375393	0.51069	0.282404	0.439858	0.139088	0.323827	0.386184	0.260752	0.181359	0.110483	0.473766	0.399509	-0.126569	0.211737	0.313592	0.558697	0.699757	0.471016	0.262694	0.411822	0.705765	0.444078	0.024317	0.467155	0.464081	0.582076	0.582567	-0.094541	0.491678	0.319299	0.567902	0.318102	0.431213	0.255235
TCGA-EJ-5522-01A	0.499588	0.249918	0.712701	0.291009	0.328989	0.18413	0.445705	0.230805	0.535356	0.229104	0.260539	0.431297	0.315389	0.359712	0.351293	0.329593	0.479746	0.326031	0.389284	0.19079	0.305866	0.357294	0.263308	0.208424	0.138969	0.498436	0.416652	-0.157005	0.209176	0.359926	0.555281	0.699866	0.411461	0.220062	0.415355	0.651207	0.418917	-0.00402597	0.432146	0.460672	0.635313	0.534666	-0.0966243	0.53406	0.314156	0.55936	0.385882	0.400652	0.240899
TCGA-EJ-5524-01A	0.513201	0.26817	0.701568	0.375408	0.337287	0.182658	0.453278	0.217672	0.484753	0.232533	0.264896	0.438584	0.325065	0.418835	0.325902	0.312921	0.465807	0.329468	0.393332	0.203575	0.301158	0.385853	0.276833	0.198564	0.169615	0.478038	0.412992	-0.15801	0.228411	0.368099	0.541732	0.699497	0.404192	0.230554	0.452064	0.66348	0.411028	-0.0141182	0.423693	0.464224	0.635589	0.520018	-0.0813148	0.55645	0.343043	0.556275	0.415344	0.396854	0.263729
TCGA-EJ-5525-01A	0.503568	0.192218	0.663605	0.418637	0.310221	0.149059	0.424774	0.179143	0.477033	0.235361	0.22763	0.476672	0.422818	0.48479	0.311383	0.300845	0.457545	0.409521	0.401031	0.15557	0.29265	0.372392	0.259762	0.152349	0.128452	0.326288	0.289771	-0.213079	0.206254	0.410539	0.563739	0.748754	0.535521	0.200599	0.459267	0.665678	0.400877	-0.055186	0.410541	0.450019	0.609943	0.525697	-0.0765613	0.606817	0.331242	0.565168	0.402914	0.378112	0.327011
TCGA-EJ-5526-01A	0.506258	0.241591	0.712694	0.363648	0.344166	0.184776	0.450961	0.228742	0.527035	0.23844	0.27663	0.445229	0.330325	0.406205	0.352416	0.327106	0.467823	0.330349	0.386678	0.177319	0.301888	0.397549	0.26736	0.180416	0.164258	0.491545	0.42459	-0.148484	0.226916	0.360247	0.551412	0.696667	0.379765	0.226138	0.431528	0.644222	0.424895	-0.0138315	0.437597	0.459657	0.637517	0.52156	-0.0991409	0.546464	0.360486	0.567698	0.421461	0.381263	0.255285
TCGA-EJ-5527-01A	0.506216	0.25888	0.697421	0.384613	0.339005	0.205347	0.470569	0.223954	0.504336	0.257353	0.280543	0.427221	0.289939	0.419679	0.372392	0.349768	0.460391	0.296122	0.400631	0.215218	0.314416	0.402578	0.291669	0.205627	0.174796	0.453027	0.406602	-0.137283	0.246614	0.351529	0.539275	0.690886	0.411364	0.234267	0.450877	0.648548	0.442844	0.0161403	0.438643	0.459383	0.634835	0.523444	-0.100894	0.574054	0.387235	0.560105	0.424281	0.391176	0.271784
TCGA-EJ-5530-01A	0.506514	0.18749	0.686186	0.316484	0.325269	0.154823	0.41837	0.21121	0.521017	0.239245	0.218109	0.450433	0.293541	0.345141	0.333891	0.313323	0.476759	0.299846	0.391863	0.167211	0.294516	0.35003	0.24065	0.144387	0.0817057	0.375869	0.309013	-0.150386	0.162155	0.366172	0.539487	0.696662	0.468623	0.304031	0.433667	0.644018	0.405671	-0.00382233	0.41055	0.470552	0.601747	0.513641	-0.121095	0.517557	0.27823	0.567782	0.366456	0.384293	0.292377
TCGA-EJ-5531-01A	0.532363	0.285071	0.695894	0.319332	0.357944	0.226949	0.457548	0.23359	0.548825	0.276342	0.296193	0.46147	0.336814	0.371816	0.388492	0.375817	0.487129	0.31772	0.419801	0.150193	0.330493	0.391264	0.270801	0.224492	0.168398	0.50373	0.451115	-0.121606	0.23723	0.345364	0.559787	0.694213	0.445011	0.265747	0.457748	0.676093	0.452732	-0.0678175	0.441341	0.473385	0.599057	0.564646	-0.109015	0.506762	0.362099	0.569273	0.381771	0.42264	0.248166
TCGA-EJ-5532-01A	0.533893	0.183902	0.716327	0.312698	0.312823	0.171657	0.415051	0.216162	0.527584	0.209655	0.211235	0.456422	0.317058	0.340179	0.351462	0.31883	0.508342	0.312109	0.397298	0.128428	0.314465	0.357722	0.235096	0.15259	0.104295	0.437012	0.356275	-0.179527	0.154114	0.338147	0.565831	0.703149	0.486267	0.237184	0.382182	0.68415	0.42323	-0.0805328	0.433501	0.46613	0.615835	0.540712	-0.106596	0.49654	0.291745	0.591697	0.3788	0.39064	0.222116
TCGA-EJ-5542-01A	0.514511	0.212257	0.709949	0.333996	0.317661	0.177867	0.428028	0.238348	0.51624	0.221506	0.228236	0.432867	0.320474	0.392121	0.350021	0.331273	0.491946	0.324662	0.389005	0.176922	0.31039	0.360538	0.262068	0.159822	0.113464	0.413965	0.35173	-0.153156	0.206774	0.353543	0.558935	0.70732	0.440664	0.215985	0.429518	0.664891	0.406818	-0.00224167	0.43987	0.464121	0.63591	0.534648	-0.0824831	0.53388	0.284203	0.569495	0.40363	0.378536	0.250826
TCGA-EJ-7115-01A	0.52238	0.180845	0.693637	0.32462	0.359717	0.208148	0.435195	0.246511	0.524713	0.233941	0.229105	0.459917	0.289231	0.380661	0.385344	0.359091	0.492904	0.291866	0.410241	0.175481	0.309114	0.387389	0.239493	0.134101	0.110338	0.410674	0.348502	-0.120606	0.165967	0.348946	0.532635	0.687129	0.45924	0.275836	0.463293	0.662713	0.450704	-0.053275	0.442415	0.464878	0.571137	0.540255	-0.122076	0.52696	0.330461	0.563828	0.385042	0.395197	0.31322
TCGA-EJ-7123-01A	0.522997	0.172016	0.717219	0.2912	0.303308	0.155416	0.41269	0.251786	0.535653	0.216737	0.219359	0.469632	0.320557	0.29038	0.380317	0.351709	0.49077	0.307583	0.404055	0.145252	0.322539	0.341322	0.232305	0.147436	0.100886	0.436156	0.360613	-0.145086	0.142121	0.340833	0.556525	0.697062	0.495374	0.213613	0.449858	0.675334	0.428589	-0.0691415	0.445055	0.461651	0.586543	0.555625	-0.12217	0.463665	0.294638	0.5771	0.345713	0.396169	0.251774
TCGA-EJ-7125-01A	0.523845	0.231356	0.700479	0.336588	0.319417	0.165686	0.451545	0.212817	0.502812	0.227621	0.238601	0.456186	0.340658	0.347793	0.343484	0.310461	0.488123	0.330115	0.423764	0.191484	0.313355	0.392875	0.272219	0.21087	0.135975	0.416076	0.369014	-0.188332	0.168423	0.365219	0.552983	0.696534	0.463311	0.250947	0.455934	0.673149	0.442227	-0.095743	0.418938	0.483013	0.603504	0.548036	-0.124063	0.529176	0.391551	0.565606	0.382252	0.403497	0.253855
TCGA-EJ-7314-01A	0.509515	0.201995	0.687954	0.275522	0.311455	0.16526	0.457703	0.208076	0.541292	0.245308	0.232507	0.482288	0.320352	0.325919	0.367613	0.351832	0.472502	0.309313	0.426486	0.185714	0.302898	0.406828	0.236808	0.145156	0.124231	0.474833	0.373066	-0.142997	0.178975	0.348169	0.5478	0.716061	0.505959	0.210272	0.412759	0.674464	0.475494	0.0174772	0.438358	0.454932	0.579942	0.54822	-0.0928429	0.544209	0.425039	0.585649	0.330956	0.433724	0.301386
TCGA-EJ-7315-01A	0.509454	0.351403	0.651559	0.379206	0.339207	0.182919	0.434834	0.221671	0.488857	0.299921	0.30309	0.477341	0.335885	0.430353	0.347882	0.341054	0.467932	0.321506	0.400404	0.185569	0.298846	0.344907	0.316792	0.286616	0.181314	0.507455	0.438687	-0.18572	0.246154	0.345227	0.544691	0.702052	0.445033	0.234596	0.457481	0.655447	0.415952	-0.00749951	0.418457	0.477461	0.599664	0.543339	-0.0965199	0.51242	0.317841	0.550346	0.34411	0.408244	0.266612
TCGA-EJ-7317-01A	0.531255	0.12644	0.715092	0.291207	0.316762	0.166454	0.38846	0.236905	0.556296	0.198947	0.179747	0.476541	0.304232	0.315669	0.351554	0.325122	0.495512	0.287062	0.400847	0.154893	0.308607	0.35368	0.209035	0.0932684	0.0565264	0.371245	0.294855	-0.152423	0.113081	0.334598	0.546261	0.691549	0.489575	0.246276	0.445264	0.683715	0.41212	-0.0951818	0.436515	0.460916	0.584247	0.553152	-0.102955	0.455295	0.259839	0.575317	0.340561	0.39578	0.248069
TCGA-EJ-7321-01A	0.513067	0.28084	0.673175	0.254971	0.298539	0.163233	0.447562	0.218173	0.495109	0.203269	0.247668	0.474963	0.314092	0.296275	0.346996	0.323956	0.4689	0.311131	0.392645	0.14437	0.301031	0.370974	0.273125	0.230005	0.14867	0.505418	0.423565	-0.148968	0.179379	0.350672	0.533911	0.719116	0.504519	0.18598	0.397732	0.681988	0.442936	-0.0453925	0.439313	0.475403	0.596482	0.532928	-0.106655	0.508621	0.379292	0.574137	0.336409	0.41956	0.274413
TCGA-EJ-7327-01A	0.50432	0.238577	0.667962	0.360322	0.352565	0.192068	0.431097	0.211845	0.494943	0.248083	0.23182	0.447191	0.337429	0.425615	0.347133	0.332141	0.470519	0.339837	0.395278	0.208602	0.304136	0.363683	0.246913	0.160397	0.123818	0.459746	0.380428	-0.15005	0.188631	0.391947	0.528048	0.694702	0.448842	0.247929	0.434636	0.631003	0.425381	0.0110928	0.428399	0.461935	0.61152	0.514472	-0.100861	0.558849	0.296032	0.559808	0.390071	0.387216	0.284168
TCGA-EJ-7328-01A	0.524328	0.335508	0.644152	0.376756	0.356502	0.217142	0.468193	0.200559	0.450607	0.298686	0.330021	0.480422	0.289851	0.413268	0.349071	0.348174	0.467948	0.276994	0.390335	0.146226	0.29529	0.391057	0.30638	0.290288	0.184169	0.539851	0.480734	-0.141735	0.261904	0.33239	0.513191	0.714228	0.475476	0.270181	0.449866	0.677593	0.460966	-0.00418639	0.414911	0.471508	0.563309	0.55632	-0.121681	0.530893	0.387479	0.552314	0.367317	0.441607	0.328274
TCGA-EJ-7330-01A	0.51751	0.187624	0.718426	0.365099	0.360042	0.223591	0.474027	0.245816	0.543106	0.246141	0.257445	0.434859	0.282881	0.406601	0.404077	0.372653	0.482365	0.281064	0.419378	0.19358	0.313914	0.432548	0.267499	0.173176	0.147663	0.475993	0.397747	-0.108508	0.207238	0.341707	0.547284	0.680828	0.445684	0.281046	0.489606	0.651502	0.476942	-0.0188789	0.442866	0.457946	0.603394	0.529994	-0.11594	0.565561	0.422689	0.56856	0.42496	0.407467	0.301147
TCGA-EJ-7331-01A	0.535851	0.229874	0.722569	0.368774	0.357854	0.205776	0.465914	0.238389	0.535082	0.241343	0.257254	0.431742	0.291229	0.423252	0.369512	0.335859	0.493229	0.293851	0.408529	0.161288	0.318363	0.405447	0.274763	0.20729	0.16438	0.479313	0.419729	-0.154617	0.22136	0.351973	0.553266	0.674351	0.415548	0.275003	0.441422	0.662961	0.439282	-0.0959826	0.442925	0.46698	0.626985	0.549676	-0.108418	0.54926	0.381347	0.571993	0.427224	0.40994	0.23882
TCGA-EJ-7781-01A	0.514972	0.231078	0.702332	0.256804	0.333678	0.188118	0.455203	0.230549	0.501958	0.238312	0.253684	0.437979	0.305124	0.346654	0.368292	0.335427	0.483993	0.312335	0.400443	0.123832	0.318575	0.382229	0.253982	0.208289	0.130493	0.45231	0.396652	-0.140797	0.208144	0.367151	0.537767	0.687645	0.446629	0.247148	0.423578	0.643358	0.426482	-0.0741069	0.436099	0.460665	0.618012	0.529621	-0.0932449	0.516896	0.344862	0.566741	0.395139	0.399209	0.226034
TCGA-EJ-7782-01A	0.502783	0.216399	0.701068	0.368589	0.350566	0.165809	0.420787	0.212604	0.550489	0.248803	0.248606	0.46483	0.333482	0.366211	0.343229	0.312388	0.441759	0.325735	0.395	0.152985	0.319808	0.349621	0.226605	0.162132	0.11197	0.452828	0.387606	-0.146133	0.173662	0.373724	0.537561	0.67655	0.438182	0.216275	0.462705	0.639218	0.425129	-0.0220699	0.412414	0.466097	0.591804	0.51655	-0.123203	0.509264	0.323805	0.567199	0.365252	0.389957	0.275435
TCGA-EJ-7783-01A	0.51292	0.201911	0.692363	0.340877	0.36074	0.237309	0.453537	0.206913	0.519383	0.253161	0.255679	0.435052	0.306861	0.373037	0.383895	0.357988	0.459983	0.308954	0.397051	0.224439	0.302693	0.41205	0.259053	0.173858	0.145662	0.416782	0.363882	-0.115105	0.215985	0.386687	0.52496	0.687529	0.431737	0.262523	0.474306	0.639675	0.455963	0.00243312	0.429181	0.454775	0.594863	0.519917	-0.121767	0.547785	0.381656	0.547442	0.426435	0.383556	0.310939
TCGA-EJ-7784-01A	0.484769	0.199512	0.688108	0.242907	0.301049	0.133616	0.4064	0.226732	0.500221	0.18736	0.203075	0.457421	0.337385	0.28381	0.340608	0.314126	0.462085	0.336527	0.374003	0.109542	0.311698	0.324614	0.225181	0.13884	0.0974927	0.441033	0.347034	-0.147417	0.145759	0.366273	0.532974	0.700451	0.477155	0.181637	0.413442	0.651663	0.409619	-0.00456769	0.43423	0.45486	0.586001	0.500537	-0.0892764	0.481372	0.289012	0.565565	0.329371	0.383939	0.281065
TCGA-EJ-7785-01A	0.515708	0.285831	0.70861	0.346343	0.37628	0.213062	0.474423	0.221296	0.499513	0.296044	0.29737	0.423899	0.293736	0.417412	0.385712	0.362549	0.470651	0.299961	0.40573	0.181063	0.313593	0.416503	0.288521	0.233906	0.175756	0.468572	0.429899	-0.136941	0.255299	0.374556	0.525124	0.678045	0.419333	0.286982	0.457346	0.629235	0.43887	-0.0491349	0.424121	0.472526	0.605991	0.520152	-0.10422	0.561573	0.403111	0.568702	0.433783	0.404634	0.311933
TCGA-EJ-7786-01A	0.522464	0.159379	0.713773	0.277626	0.335155	0.174487	0.425488	0.237471	0.544689	0.218598	0.216523	0.451249	0.275913	0.35365	0.36287	0.332375	0.494322	0.273377	0.396352	0.136747	0.317978	0.36659	0.230887	0.139478	0.0943889	0.42135	0.341627	-0.131465	0.170301	0.331628	0.54629	0.681783	0.445422	0.395494	0.420615	0.667748	0.424456	-0.0900548	0.432494	0.452025	0.604094	0.538394	-0.114871	0.480705	0.303491	0.567366	0.382144	0.414269	0.234017
TCGA-EJ-7788-01A	0.516057	0.220778	0.674431	0.341333	0.338304	0.164425	0.422849	0.204506	0.464195	0.220893	0.217935	0.460061	0.37059	0.380348	0.332207	0.314749	0.477246	0.356255	0.398658	0.152334	0.296874	0.348213	0.243011	0.15646	0.10467	0.431465	0.363349	-0.152459	0.18382	0.374492	0.541521	0.719224	0.478846	0.34933	0.40394	0.675475	0.412443	-0.0896162	0.433808	0.463024	0.606224	0.540051	-0.107526	0.522142	0.268611	0.567556	0.374364	0.386005	0.252982
TCGA-EJ-7789-01A	0.497035	0.13683	0.673605	0.266139	0.274961	0.124802	0.339215	0.2418	0.503173	0.095788	0.140841	0.48286	0.444954	0.256062	0.278647	0.268912	0.471149	0.413355	0.373042	0.110644	0.300671	0.298735	0.198934	0.0654578	0.0560767	0.317148	0.257759	-0.177985	0.0784059	0.384394	0.558595	0.732807	0.525678	0.170549	0.391447	0.685723	0.356744	-0.0815185	0.451282	0.454011	0.573786	0.512728	-0.0894713	0.455037	0.196664	0.560817	0.323996	0.353493	0.278256
TCGA-EJ-7791-01A	0.53241	0.223147	0.682651	0.394931	0.37588	0.235169	0.491857	0.231639	0.543613	0.292943	0.274477	0.442338	0.29121	0.464823	0.389737	0.374116	0.482686	0.286381	0.436879	0.192343	0.311585	0.442805	0.277031	0.2102	0.156215	0.465794	0.397029	-0.122836	0.228435	0.347169	0.547857	0.67455	0.4269	0.303681	0.499937	0.651067	0.482317	-0.0594517	0.437339	0.461673	0.599001	0.544599	-0.123854	0.549013	0.410791	0.561265	0.417461	0.420812	0.307429
TCGA-EJ-7792-01A	0.528117	0.29145	0.679668	0.377671	0.391687	0.233526	0.471121	0.2126	0.48571	0.303674	0.29502	0.430721	0.262918	0.464453	0.364125	0.352546	0.491391	0.265586	0.403889	0.168333	0.310434	0.41244	0.316954	0.268666	0.177574	0.477904	0.425418	-0.156068	0.259745	0.334849	0.529973	0.683331	0.435853	0.465555	0.447873	0.670135	0.440916	-0.058672	0.41705	0.468964	0.601202	0.547352	-0.119258	0.532207	0.380335	0.564701	0.424076	0.420876	0.276426
TCGA-EJ-7793-01A	0.536611	0.194093	0.703298	0.289381	0.326552	0.212371	0.402826	0.255336	0.551095	0.217092	0.226472	0.46381	0.29525	0.312735	0.350929	0.333636	0.506217	0.287647	0.400154	0.156268	0.306857	0.367703	0.215528	0.104839	0.0722015	0.430616	0.337598	-0.12624	0.153953	0.336544	0.54498	0.685707	0.427237	0.270067	0.405231	0.68275	0.416212	-0.00798566	0.451941	0.459965	0.607204	0.537627	-0.0825531	0.462304	0.248921	0.556875	0.355655	0.404504	0.263115
TCGA-EJ-7794-01A	0.533776	0.242816	0.701671	0.323807	0.358352	0.221789	0.478129	0.246599	0.542952	0.288981	0.291752	0.439675	0.306459	0.395288	0.405739	0.374642	0.491259	0.305865	0.418357	0.195172	0.31921	0.414467	0.266786	0.211353	0.176319	0.466724	0.413438	-0.13676	0.230984	0.358895	0.54491	0.680919	0.443721	0.273394	0.454365	0.654187	0.460628	-0.058065	0.45064	0.45578	0.59413	0.543812	-0.117796	0.535205	0.393396	0.559575	0.408291	0.414098	0.26823
TCGA-EJ-7797-01A	0.511315	0.228554	0.690539	0.304248	0.32442	0.191946	0.438794	0.207222	0.524284	0.242303	0.263643	0.473428	0.286142	0.332457	0.366139	0.350082	0.468187	0.282882	0.405237	0.145717	0.298485	0.391616	0.252764	0.187398	0.127232	0.485008	0.4054	-0.132413	0.20211	0.32583	0.545278	0.710774	0.486486	0.238483	0.443475	0.662076	0.450701	-0.0478158	0.43537	0.467642	0.59306	0.542284	-0.105329	0.49125	0.364685	0.585259	0.359276	0.412834	0.290545
TCGA-EJ-8468-01A	0.515689	0.253267	0.694639	0.377984	0.341109	0.193641	0.467891	0.244272	0.556442	0.255611	0.292568	0.43522	0.279535	0.417272	0.362291	0.345489	0.486864	0.27532	0.385678	0.162851	0.321826	0.408426	0.283807	0.20593	0.171799	0.492365	0.426218	-0.169613	0.237177	0.322683	0.535816	0.669012	0.363209	0.249917	0.418341	0.664607	0.446346	-0.0647285	0.434124	0.460867	0.612894	0.539744	-0.120193	0.537594	0.442434	0.566362	0.392358	0.418006	0.255648
TCGA-EJ-8469-01A	0.486412	0.196192	0.672058	0.288984	0.288781	0.118087	0.382329	0.175148	0.513969	0.164853	0.181212	0.490263	0.426134	0.305772	0.304754	0.29558	0.464935	0.402806	0.385145	0.11754	0.286652	0.351888	0.238737	0.118068	0.100255	0.363546	0.316039	-0.187299	0.154639	0.391066	0.572528	0.744711	0.516592	0.176479	0.372583	0.664461	0.39313	0.0919503	0.41699	0.469293	0.608129	0.507505	-0.0697222	0.497832	0.292518	0.58377	0.323309	0.383992	0.239529
TCGA-EJ-8470-01A	0.501451	0.397499	0.706336	0.272338	0.318322	0.176247	0.487229	0.192773	0.503497	0.273012	0.342231	0.472686	0.344512	0.34029	0.349785	0.34313	0.480697	0.326867	0.389629	0.144319	0.30643	0.394392	0.309436	0.336011	0.241386	0.621588	0.566895	-0.159617	0.268394	0.33073	0.558045	0.710838	0.453477	0.179052	0.420342	0.673767	0.464346	-0.0394962	0.436234	0.486462	0.59237	0.551377	-0.111853	0.505846	0.470796	0.586312	0.348773	0.450673	0.253224
TCGA-EJ-8472-01A	0.489826	0.168695	0.653946	0.311493	0.297692	0.146924	0.439806	0.193475	0.476602	0.21269	0.202623	0.48673	0.397779	0.360304	0.322778	0.317264	0.462646	0.382362	0.381272	0.127671	0.291341	0.381424	0.239675	0.14094	0.104404	0.431313	0.345208	-0.150029	0.161683	0.37405	0.519105	0.717629	0.426577	0.221083	0.386015	0.682812	0.433059	-0.00210636	0.435942	0.472673	0.564131	0.522217	-0.074722	0.551578	0.348255	0.549313	0.34996	0.393462	0.259925
TCGA-EJ-8474-01A	0.518665	0.19909	0.65147	0.334447	0.304284	0.147437	0.41808	0.216923	0.504581	0.221322	0.227254	0.482058	0.334156	0.371706	0.338339	0.317557	0.477478	0.325723	0.392214	0.10675	0.302353	0.357854	0.241999	0.149735	0.0918148	0.432047	0.35624	-0.180713	0.181038	0.335318	0.53686	0.712951	0.46815	0.253177	0.3828	0.68945	0.423429	-0.0526383	0.427137	0.462933	0.593431	0.533445	-0.101161	0.488706	0.27663	0.569081	0.363953	0.390887	0.246894
TCGA-EJ-A46B-01A	0.541819	0.146275	0.687365	0.242227	0.339053	0.248895	0.397531	0.249046	0.546367	0.212928	0.202939	0.466866	0.258217	0.305786	0.362118	0.345667	0.501588	0.248675	0.392983	0.141422	0.311117	0.374043	0.202715	0.0887834	0.073106	0.424166	0.326296	-0.116831	0.133059	0.31379	0.5295	0.680416	0.428739	0.287405	0.424282	0.683895	0.424771	-0.0459218	0.4555	0.447405	0.582817	0.542514	-0.106403	0.449385	0.258087	0.550961	0.338513	0.404075	0.284706
TCGA-EJ-A46D-01A	0.534795	0.206534	0.660649	0.263178	0.330477	0.208489	0.418981	0.234131	0.522932	0.260872	0.250716	0.479284	0.278682	0.331786	0.366269	0.358338	0.49463	0.258848	0.40395	0.134765	0.304713	0.383977	0.228383	0.134382	0.0929719	0.411827	0.350887	-0.125312	0.166443	0.309437	0.522639	0.699658	0.48143	0.27713	0.429199	0.694871	0.432707	-0.00926511	0.427613	0.452655	0.560158	0.549743	-0.118814	0.47433	0.301753	0.557686	0.339381	0.412057	0.304574
TCGA-EJ-A46E-01A	0.502347	0.217459	0.615753	0.297318	0.356886	0.266506	0.504615	0.201616	0.513972	0.243571	0.267824	0.477709	0.281084	0.384071	0.405371	0.382401	0.459011	0.256827	0.404161	0.150607	0.30271	0.461531	0.273176	0.194987	0.191772	0.497611	0.422977	-0.0816417	0.206033	0.32131	0.494582	0.682148	0.45121	0.298183	0.473454	0.642618	0.512184	-0.0618776	0.4166	0.443858	0.549625	0.520418	-0.125998	0.576764	0.508046	0.547346	0.368907	0.44359	0.356818
TCGA-EJ-A46F-01A	0.486158	0.169626	0.594041	0.246853	0.242772	0.0779045	0.329097	0.203743	0.51222	0.16506	0.17067	0.539825	0.375603	0.215986	0.278053	0.286738	0.477269	0.34367	0.375166	0.0751572	0.270956	0.297687	0.235804	0.120669	0.0388531	0.38056	0.292083	-0.170564	0.11126	0.299264	0.520893	0.7379	0.553493	0.169154	0.373643	0.7172	0.393444	0.0258973	0.438527	0.441627	0.498969	0.553485	-0.0693815	0.404924	0.207518	0.540293	0.209891	0.391255	0.227458
TCGA-EJ-A46G-01A	0.483629	0.20255	0.65985	0.355015	0.331153	0.16074	0.427881	0.212726	0.510841	0.212976	0.217883	0.470055	0.383557	0.360476	0.322774	0.308017	0.460129	0.364694	0.401304	0.196028	0.281431	0.364345	0.255424	0.197508	0.144535	0.487702	0.398379	-0.188081	0.15731	0.372525	0.516916	0.699604	0.449363	0.217899	0.459803	0.641405	0.43617	0.0251733	0.407774	0.458828	0.541767	0.485986	-0.0900695	0.522706	0.347408	0.555638	0.327867	0.425359	0.273916
TCGA-EJ-A46H-01A	0.522563	0.263717	0.665651	0.402289	0.410435	0.317454	0.550161	0.227528	0.54781	0.283275	0.298025	0.418057	0.234625	0.493598	0.434469	0.406371	0.461154	0.243023	0.419668	0.224857	0.305496	0.489855	0.330066	0.271043	0.245093	0.47743	0.434654	-0.0788369	0.279072	0.358305	0.526816	0.646616	0.384147	0.321648	0.508445	0.611388	0.521158	-0.0335103	0.432753	0.457815	0.567895	0.537962	-0.142844	0.607814	0.54839	0.527635	0.448206	0.436373	0.34253
TCGA-EJ-A46I-01A	0.525055	0.192444	0.667098	0.256763	0.35565	0.239352	0.446494	0.236655	0.539646	0.24286	0.24274	0.454448	0.271416	0.338271	0.387904	0.359753	0.4872	0.266859	0.397486	0.122982	0.307615	0.379651	0.23671	0.165556	0.1127	0.472313	0.390026	-0.096702	0.164667	0.332315	0.515597	0.677815	0.443268	0.301907	0.48028	0.654409	0.461925	-0.0917581	0.440723	0.453481	0.563713	0.540521	-0.135338	0.497934	0.337758	0.551299	0.368156	0.421916	0.310948
TCGA-EJ-A65B-01A	0.548524	0.191192	0.610195	0.355143	0.319954	0.201396	0.414504	0.241511	0.522052	0.266475	0.245255	0.502862	0.300554	0.368894	0.354667	0.375487	0.501654	0.265975	0.422896	0.114349	0.290438	0.38378	0.267602	0.137069	0.0975539	0.426396	0.346297	-0.12036	0.185092	0.271934	0.540193	0.707059	0.522844	0.303221	0.407947	0.717933	0.446543	-0.0226146	0.446615	0.436329	0.532626	0.587613	-0.0954564	0.465448	0.305184	0.56571	0.283164	0.429818	0.283608
TCGA-EJ-A65D-01A	0.475308	0.109065	0.553537	0.201959	0.237671	0.0876703	0.323656	0.201097	0.484306	0.153353	0.125967	0.551612	0.435988	0.209165	0.272039	0.281369	0.470139	0.386571	0.381199	0.0392608	0.258712	0.299173	0.195833	0.0394771	0.00179951	0.335242	0.239058	-0.170583	0.0660157	0.325409	0.527837	0.752863	0.602411	0.175606	0.376513	0.712183	0.376968	-0.0242675	0.441511	0.446821	0.483472	0.524014	-0.0601011	0.380335	0.172751	0.552932	0.200175	0.375354	0.257986
TCGA-EJ-A65E-01A	0.513826	0.163395	0.703679	0.27177	0.292106	0.170905	0.428589	0.256146	0.530416	0.188068	0.209363	0.492591	0.348275	0.2787	0.33359	0.328875	0.506208	0.324587	0.403841	0.126008	0.296622	0.374092	0.225899	0.127772	0.0757003	0.440492	0.347575	-0.149269	0.147042	0.32265	0.542016	0.708593	0.465264	0.184587	0.394826	0.695332	0.451069	-0.0435825	0.457902	0.476272	0.571965	0.528668	-0.0806938	0.484543	0.341199	0.566531	0.321875	0.404449	0.2203
TCGA-EJ-A65F-01A	0.509861	0.217465	0.655749	0.358023	0.30909	0.140847	0.440391	0.201047	0.497057	0.215997	0.214308	0.485996	0.314342	0.356561	0.311376	0.295467	0.462226	0.29694	0.380129	0.185954	0.296681	0.369314	0.262353	0.162869	0.141139	0.45297	0.379122	-0.167939	0.189157	0.346986	0.517082	0.711609	0.465703	0.205443	0.419627	0.683901	0.432577	0.0414628	0.419105	0.45329	0.574008	0.519333	-0.10668	0.527726	0.36972	0.569456	0.350823	0.393557	0.278408
TCGA-EJ-A65G-01A	0.522711	0.128151	0.693914	0.202512	0.283478	0.133935	0.389218	0.227478	0.53802	0.176185	0.176784	0.487921	0.291379	0.259587	0.324427	0.306195	0.498616	0.267574	0.388572	0.0915061	0.30555	0.335887	0.200939	0.10855	0.0551226	0.401802	0.303975	-0.157122	0.114674	0.300692	0.529747	0.699843	0.468341	0.295537	0.379376	0.695342	0.408387	-0.0914742	0.431643	0.451953	0.584724	0.546161	-0.104672	0.427211	0.268597	0.574354	0.305385	0.401919	0.222612
TCGA-EJ-A65J-01A	0.518373	0.17995	0.692218	0.277902	0.284852	0.109216	0.395026	0.254586	0.546483	0.19539	0.21893	0.474856	0.296417	0.323548	0.33073	0.319667	0.489899	0.293359	0.394962	0.0748801	0.320783	0.353663	0.232866	0.138728	0.105883	0.424706	0.35393	-0.162065	0.136343	0.318043	0.553699	0.698045	0.468158	0.18157	0.430006	0.679	0.407819	-0.0445598	0.442251	0.468842	0.595075	0.563831	-0.117912	0.482697	0.313195	0.567626	0.31342	0.395293	0.225442
TCGA-EJ-A65M-01A	0.526701	0.248141	0.668346	0.254636	0.292523	0.175422	0.432943	0.245746	0.543698	0.234469	0.253882	0.519434	0.359336	0.323876	0.336827	0.354271	0.513528	0.317023	0.41581	0.0736505	0.310278	0.379441	0.239766	0.157567	0.107357	0.460914	0.395153	-0.149599	0.16813	0.280612	0.554659	0.719135	0.48967	0.238629	0.407697	0.712918	0.453488	-0.0778453	0.452053	0.464579	0.547702	0.577205	-0.0919648	0.442611	0.324006	0.574372	0.299533	0.444512	0.227534
TCGA-EJ-A6RA-01A	0.530362	0.205502	0.646072	0.26162	0.324017	0.226496	0.423384	0.231894	0.506394	0.234432	0.24247	0.501912	0.295722	0.308693	0.357091	0.359144	0.503169	0.267942	0.415591	0.114273	0.297124	0.384589	0.229972	0.145619	0.100971	0.472139	0.376393	-0.126554	0.16325	0.288785	0.521921	0.705616	0.479528	0.273736	0.41235	0.700464	0.448828	-0.0149556	0.438319	0.445786	0.552451	0.569404	-0.0999625	0.46618	0.296804	0.559478	0.30215	0.423021	0.275065
TCGA-EJ-A6RC-01A	0.526077	0.297171	0.646429	0.290501	0.379147	0.236841	0.463907	0.216861	0.508796	0.272277	0.280974	0.467147	0.282374	0.417841	0.364069	0.361121	0.484992	0.269988	0.407492	0.14352	0.305956	0.408824	0.304033	0.256414	0.154287	0.509929	0.431618	-0.11948	0.222812	0.324157	0.517582	0.688424	0.447774	0.461871	0.44981	0.676775	0.462622	-0.0856907	0.423989	0.461894	0.549766	0.572271	-0.13373	0.500074	0.376408	0.554545	0.37817	0.434796	0.284426
TCGA-EJ-A7NF-01A	0.513571	0.191437	0.649027	0.247389	0.282413	0.131565	0.381051	0.238165	0.487404	0.220885	0.214737	0.505391	0.32298	0.238053	0.321323	0.316735	0.492242	0.299772	0.382774	0.0927911	0.29749	0.31551	0.219536	0.138426	0.0613355	0.431703	0.335431	-0.147847	0.129594	0.324958	0.524083	0.722719	0.506194	0.210504	0.373594	0.706278	0.40899	-0.000289149	0.448303	0.452701	0.558103	0.552875	-0.0939779	0.419209	0.255943	0.579501	0.266932	0.413732	0.270209
TCGA-EJ-A7NG-01A	0.528431	0.19409	0.654531	0.327631	0.362871	0.230801	0.467525	0.218652	0.529294	0.282015	0.270708	0.463742	0.264979	0.401386	0.363413	0.352844	0.488397	0.263008	0.413574	0.151749	0.302076	0.4244	0.250384	0.20512	0.140435	0.453082	0.388758	-0.133159	0.213726	0.318432	0.521005	0.69072	0.429305	0.31137	0.456687	0.67806	0.464693	-0.0331681	0.431541	0.449515	0.573492	0.559147	-0.106231	0.514479	0.395993	0.559137	0.381571	0.422316	0.320035
TCGA-EJ-A7NH-01A	0.520341	0.168274	0.666704	0.264323	0.339016	0.194496	0.40227	0.239687	0.5361	0.208898	0.206459	0.475325	0.274651	0.336257	0.350796	0.338583	0.483252	0.259449	0.385684	0.136219	0.303425	0.366788	0.215935	0.104535	0.0880404	0.411126	0.330408	-0.121109	0.152673	0.319665	0.513552	0.683886	0.450844	0.271306	0.427231	0.665847	0.431471	-0.0272939	0.429249	0.444294	0.555995	0.534577	-0.120035	0.482308	0.278807	0.54835	0.34115	0.403475	0.310429
TCGA-EJ-A7NJ-01A	0.526683	0.23919	0.696843	0.222323	0.336022	0.246406	0.438991	0.251425	0.583251	0.200302	0.246939	0.460025	0.260549	0.289675	0.349837	0.343944	0.4978	0.259237	0.405227	0.118847	0.306106	0.389425	0.255118	0.202964	0.123323	0.601322	0.467169	-0.109682	0.164552	0.320276	0.54526	0.668424	0.393814	0.245319	0.371125	0.679126	0.456537	-0.0443852	0.441954	0.451052	0.597355	0.579308	-0.114576	0.503105	0.32523	0.554361	0.324688	0.42198	0.261048
TCGA-EJ-A7NK-01A	0.534345	0.18042	0.664449	0.274717	0.359791	0.240062	0.45172	0.236231	0.551112	0.225424	0.237628	0.468537	0.264101	0.345907	0.368747	0.368632	0.498626	0.256463	0.404357	0.132545	0.298997	0.411046	0.244797	0.159296	0.111429	0.512283	0.398986	-0.0895327	0.163456	0.317675	0.522129	0.678857	0.430894	0.324161	0.438423	0.669032	0.475298	-0.0353223	0.445023	0.443764	0.564875	0.566184	-0.118724	0.512777	0.345848	0.546963	0.355456	0.42189	0.314773
TCGA-EJ-A7NM-01A	0.497639	0.310776	0.594534	0.307946	0.334905	0.162583	0.44545	0.202338	0.453472	0.25078	0.262353	0.514769	0.359497	0.366851	0.31955	0.32639	0.477922	0.327303	0.409172	0.147724	0.307368	0.365095	0.309764	0.279466	0.15601	0.547962	0.446725	-0.152072	0.210898	0.33851	0.524146	0.722748	0.499945	0.228864	0.413416	0.679401	0.44238	0.0276965	0.420236	0.470617	0.543075	0.571011	-0.111393	0.510817	0.347722	0.556019	0.308596	0.409681	0.272396
TCGA-EJ-A7NN-01A	0.517412	0.259901	0.642468	0.309237	0.333282	0.185814	0.442953	0.215145	0.50902	0.268383	0.294451	0.485454	0.341997	0.330742	0.354585	0.346489	0.474632	0.320184	0.398854	0.154755	0.306408	0.371558	0.268568	0.239373	0.152543	0.650676	0.523486	-0.158347	0.206045	0.345081	0.530832	0.692656	0.443171	0.236403	0.43486	0.670771	0.448942	-0.065613	0.417557	0.463899	0.560481	0.557	-0.0938888	0.493729	0.36981	0.583475	0.322808	0.438341	0.259144
TCGA-EJ-A8FN-01A	0.536198	0.238282	0.660063	0.275402	0.342768	0.173605	0.419967	0.218921	0.506898	0.224815	0.237822	0.466282	0.288494	0.342251	0.340791	0.31836	0.514622	0.266613	0.37939	0.106666	0.314586	0.364707	0.258859	0.192822	0.105746	0.461098	0.389404	-0.1399	0.180481	0.312151	0.535439	0.693284	0.465483	0.529225	0.399293	0.701391	0.425458	-0.112401	0.417066	0.462432	0.568184	0.571171	-0.122262	0.434091	0.309688	0.553326	0.326082	0.427687	0.235632
TCGA-EJ-A8FO-01A	0.532809	0.181636	0.694465	0.309193	0.337027	0.21574	0.422815	0.236109	0.534415	0.229788	0.225366	0.468249	0.287071	0.332803	0.351869	0.350023	0.507599	0.279151	0.410942	0.156138	0.30212	0.384151	0.228352	0.120979	0.0829975	0.436884	0.338758	-0.124296	0.176646	0.330714	0.536421	0.690237	0.4246	0.269879	0.419324	0.683272	0.425116	-0.0188857	0.432501	0.446945	0.595193	0.549088	-0.073412	0.482831	0.293235	0.565589	0.357552	0.402734	0.29224
TCGA-EJ-A8FP-01A	0.544484	0.217654	0.68429	0.343402	0.370351	0.260093	0.458458	0.234973	0.541008	0.258136	0.276461	0.458402	0.257381	0.391377	0.369675	0.360777	0.48392	0.255966	0.410971	0.16978	0.310036	0.431639	0.266208	0.199724	0.14963	0.502507	0.417846	-0.115651	0.215731	0.322159	0.533943	0.679498	0.399319	0.299185	0.474549	0.669968	0.467307	-0.0093602	0.432597	0.448692	0.582084	0.561143	-0.117024	0.529632	0.378601	0.554955	0.386282	0.426496	0.355882
TCGA-EJ-A8FS-01A	0.497216	0.162979	0.651534	0.177603	0.271368	0.111035	0.366792	0.24153	0.527641	0.17636	0.206329	0.498539	0.332837	0.208756	0.336301	0.318757	0.482375	0.308858	0.364721	0.077754	0.305425	0.30683	0.197662	0.0911772	0.0576042	0.498892	0.375455	-0.156639	0.108028	0.320795	0.531745	0.70603	0.491182	0.168705	0.375394	0.686168	0.411261	-0.106863	0.424846	0.460147	0.56227	0.543815	-0.0971951	0.403089	0.25185	0.565424	0.269104	0.398046	0.25045
TCGA-EJ-A8FU-01A	0.533607	0.217559	0.675734	0.342149	0.376321	0.237624	0.471622	0.22613	0.53449	0.26027	0.270754	0.460876	0.272543	0.430967	0.37787	0.36474	0.489154	0.26433	0.412844	0.179751	0.298731	0.438942	0.267774	0.195452	0.149549	0.501876	0.410741	-0.108425	0.218655	0.330361	0.532146	0.690757	0.448478	0.32686	0.476525	0.674567	0.468543	0.0200193	0.431703	0.449478	0.572544	0.551736	-0.123888	0.540298	0.416557	0.56101	0.39392	0.434701	0.33433
TCGA-EJ-AB20-01A	0.531001	0.254154	0.502795	0.397359	0.372923	0.259034	0.475566	0.185528	0.452481	0.248804	0.26096	0.499211	0.305486	0.459903	0.298742	0.329788	0.451845	0.254754	0.404752	0.168842	0.276395	0.449658	0.300184	0.242482	0.151304	0.492049	0.407891	-0.103265	0.231163	0.295492	0.495518	0.699784	0.452687	0.375096	0.502912	0.694413	0.48131	-0.0379248	0.405446	0.439788	0.488373	0.556724	-0.11506	0.532271	0.409797	0.51502	0.391143	0.450707	0.359335
TCGA-EJ-AB27-01A	0.528882	0.280313	0.683914	0.244802	0.338695	0.223162	0.464964	0.235216	0.558273	0.230361	0.265243	0.481395	0.290417	0.327049	0.370562	0.358186	0.49965	0.285264	0.41728	0.126105	0.30751	0.409012	0.288254	0.266664	0.149585	0.523456	0.437051	-0.123979	0.201187	0.317378	0.555939	0.69491	0.456783	0.277775	0.422672	0.690781	0.465549	-0.0939488	0.446879	0.470725	0.579293	0.572429	-0.10486	0.480411	0.397047	0.579624	0.335084	0.451403	0.282671
TCGA-FC-7708-01A	0.52558	0.276988	0.690224	0.397881	0.368204	0.216492	0.490473	0.239579	0.522586	0.328167	0.316548	0.443704	0.260302	0.450883	0.387228	0.372512	0.476319	0.269237	0.419529	0.195503	0.304113	0.431282	0.28716	0.224355	0.183821	0.495463	0.459862	-0.138757	0.252281	0.329383	0.547001	0.687178	0.427365	0.282572	0.458632	0.657146	0.463738	-0.00440754	0.431587	0.460684	0.599712	0.556401	-0.11498	0.558463	0.42436	0.571757	0.405361	0.434142	0.307457
TCGA-FC-7961-01A	0.525594	0.206158	0.68798	0.338769	0.330351	0.15848	0.424868	0.228112	0.544307	0.245475	0.253138	0.484571	0.397506	0.436235	0.342934	0.336493	0.490613	0.355382	0.410714	0.160233	0.317491	0.388249	0.245332	0.140802	0.12787	0.446495	0.378069	-0.17893	0.185611	0.326624	0.572209	0.710683	0.433162	0.258262	0.434293	0.689263	0.434652	-0.0621112	0.435414	0.475966	0.590536	0.550597	-0.0985185	0.511431	0.317123	0.587748	0.378762	0.41463	0.239613
TCGA-FC-A4JI-01A	0.487949	0.176041	0.668746	0.173846	0.241857	0.0729003	0.388793	0.17535	0.517413	0.106374	0.195577	0.525648	0.569473	0.165398	0.278093	0.309359	0.469938	0.540725	0.39543	0.0238548	0.30229	0.321314	0.231938	0.16358	0.0988681	0.460295	0.36187	-0.17539	0.104013	0.407757	0.606324	0.779933	0.618309	0.0896174	0.349967	0.682315	0.399672	-0.205245	0.432293	0.497084	0.547769	0.544186	-0.0224376	0.463189	0.293504	0.605252	0.23139	0.417038	0.236069
TCGA-FC-A5OB-01A	0.506944	0.107097	0.711392	0.201623	0.225102	0.120039	0.342196	0.207247	0.531934	0.0925352	0.147646	0.50001	0.375263	0.184325	0.285592	0.264437	0.490585	0.348246	0.373457	0.121826	0.299947	0.303421	0.18398	0.0619361	0.0342718	0.334731	0.26344	-0.194654	0.0830739	0.321176	0.580624	0.728206	0.502037	0.128	0.351793	0.702772	0.374253	-0.0798314	0.4492	0.469389	0.61315	0.512421	-0.0803653	0.415606	0.20637	0.592229	0.296311	0.373909	0.203336
TCGA-FC-A66V-01A	0.525665	0.204998	0.611151	0.228233	0.317573	0.263094	0.417233	0.24988	0.538827	0.243902	0.254658	0.510869	0.272366	0.311155	0.337615	0.370594	0.489012	0.230859	0.419236	0.0942451	0.299206	0.39502	0.244283	0.132811	0.0916431	0.490798	0.392253	-0.092455	0.173222	0.256546	0.51731	0.680992	0.461311	0.285498	0.37141	0.698685	0.454878	-0.00830536	0.446401	0.425445	0.51837	0.582534	-0.0912436	0.446168	0.30101	0.531933	0.256889	0.427998	0.235208
TCGA-FC-A6HD-01A	0.507618	0.150145	0.593537	0.207614	0.232106	0.142732	0.347493	0.194471	0.517819	0.133797	0.160096	0.55711	0.425959	0.187832	0.288086	0.311485	0.485922	0.368546	0.386138	0.0596837	0.285017	0.323239	0.22123	0.0957315	0.0405537	0.351455	0.282706	-0.159519	0.0964507	0.29703	0.536161	0.749444	0.604701	0.175598	0.357997	0.730868	0.414863	-0.147457	0.43333	0.458801	0.498007	0.557663	-0.076813	0.388756	0.25871	0.566632	0.205586	0.401028	0.211858
TCGA-FC-A8O0-01A	0.531774	0.121054	0.576875	0.342541	0.350171	0.18723	0.396354	0.219127	0.491373	0.212935	0.190715	0.487047	0.282133	0.358759	0.318869	0.308622	0.481131	0.253398	0.39978	0.111878	0.294473	0.364993	0.206177	0.115031	0.0474106	0.432334	0.310136	-0.115801	0.125851	0.314537	0.485838	0.688832	0.409179	0.280326	0.468318	0.692937	0.447323	-0.0241635	0.433987	0.442214	0.548725	0.533589	-0.126898	0.477512	0.256501	0.522604	0.351322	0.400176	0.332263
TCGA-G9-6329-01A	0.533034	0.262966	0.641377	0.337681	0.339249	0.232355	0.46159	0.190723	0.490988	0.259913	0.279439	0.485553	0.297288	0.383069	0.356568	0.368439	0.47848	0.286499	0.411431	0.161237	0.294842	0.402291	0.273655	0.223153	0.136919	0.475828	0.413378	-0.111401	0.223532	0.302886	0.529987	0.708916	0.471229	0.3035	0.429438	0.693662	0.464068	0.0386584	0.4345	0.473503	0.546344	0.559431	-0.092223	0.517034	0.381102	0.56142	0.3622	0.427892	0.282624
TCGA-G9-6332-01A	0.505271	0.173226	0.641286	0.246815	0.259036	0.129238	0.36335	0.207907	0.490482	0.170454	0.183214	0.493014	0.286623	0.230804	0.327436	0.311225	0.485932	0.261914	0.39122	0.136232	0.291219	0.313435	0.213042	0.104681	0.0540848	0.358156	0.288625	-0.151888	0.112131	0.298782	0.539385	0.724214	0.523758	0.18206	0.384914	0.708407	0.393708	-0.000533805	0.434355	0.460371	0.577417	0.532564	-0.0998867	0.444245	0.232021	0.571107	0.278576	0.391932	0.261593
TCGA-G9-6333-01A	0.5243	0.2318	0.692827	0.331627	0.328146	0.194378	0.477603	0.235707	0.562604	0.223911	0.239493	0.465122	0.27801	0.367405	0.379789	0.353074	0.482827	0.276557	0.410178	0.127327	0.302164	0.416681	0.272348	0.222457	0.174527	0.50893	0.423978	-0.128046	0.180261	0.312006	0.549168	0.677247	0.456342	0.270736	0.441431	0.676242	0.483949	-0.0560482	0.442981	0.470863	0.557762	0.558845	-0.123623	0.532002	0.462901	0.57254	0.360462	0.437696	0.273966
TCGA-G9-6336-01A	0.531282	0.221595	0.67581	0.300763	0.326112	0.256093	0.456549	0.231745	0.533026	0.265617	0.26855	0.485408	0.287476	0.358069	0.385675	0.384315	0.483224	0.276967	0.430469	0.15378	0.303042	0.415144	0.244294	0.160448	0.127476	0.459305	0.384668	-0.106906	0.187965	0.302234	0.546855	0.699471	0.481347	0.253451	0.418453	0.693349	0.468473	-0.0236437	0.449867	0.460983	0.57996	0.5699	-0.112384	0.519038	0.377632	0.574503	0.332729	0.429527	0.281294
TCGA-G9-6338-01A	0.561099	0.175766	0.62675	0.343763	0.324907	0.158394	0.429054	0.220009	0.514616	0.230892	0.227352	0.474394	0.254455	0.404311	0.344867	0.32584	0.510584	0.242537	0.39934	0.152742	0.321767	0.431289	0.259752	0.159368	0.108726	0.458393	0.368232	-0.0888629	0.182184	0.283555	0.528671	0.681562	0.483879	0.62165	0.423611	0.730784	0.4624	-0.116091	0.420277	0.453723	0.500018	0.580437	-0.106311	0.496363	0.369612	0.536898	0.329527	0.447143	0.247086
TCGA-G9-6339-01A	0.519558	0.230608	0.637724	0.276033	0.291642	0.188079	0.452757	0.211593	0.515418	0.220536	0.251532	0.498731	0.282901	0.314634	0.355684	0.359757	0.498778	0.26758	0.428967	0.138265	0.295519	0.390483	0.257425	0.198432	0.124912	0.502577	0.41464	-0.123898	0.176521	0.287891	0.544691	0.711746	0.521663	0.243023	0.395108	0.706731	0.473981	-0.00751594	0.447519	0.461977	0.556775	0.565424	-0.115683	0.4803	0.377265	0.566696	0.303327	0.445352	0.269582
TCGA-G9-6342-01A	0.525629	0.197735	0.662893	0.361054	0.317476	0.202484	0.438236	0.22238	0.516462	0.238346	0.229202	0.478711	0.290116	0.31901	0.359974	0.351861	0.482749	0.280748	0.412036	0.156935	0.304622	0.38462	0.245899	0.159517	0.100047	0.42582	0.354626	-0.131599	0.178993	0.319307	0.543823	0.704905	0.472805	0.256994	0.425897	0.684547	0.449914	0.02637	0.455578	0.467483	0.581268	0.551544	-0.120381	0.491498	0.350815	0.581633	0.320184	0.425379	0.316537
TCGA-G9-6343-01A	0.529397	0.167937	0.664721	0.260447	0.30759	0.178308	0.407471	0.226695	0.540919	0.224939	0.231879	0.50126	0.288338	0.309532	0.353303	0.353063	0.491645	0.274527	0.396835	0.0925703	0.298693	0.367	0.229934	0.133111	0.0766005	0.408217	0.343721	-0.125975	0.155403	0.291287	0.533844	0.692437	0.510512	0.363648	0.415995	0.699743	0.424603	-0.0656868	0.428542	0.459347	0.526729	0.569267	-0.101815	0.439814	0.29182	0.562112	0.297478	0.419079	0.223455
TCGA-G9-6347-01A	0.529973	0.315815	0.52315	0.261057	0.348013	0.2545	0.434959	0.201153	0.465347	0.311183	0.311693	0.505746	0.257884	0.389543	0.32213	0.338087	0.484708	0.222655	0.396763	0.0889596	0.275199	0.392971	0.316768	0.255756	0.130998	0.570138	0.479822	-0.119369	0.237988	0.257195	0.483884	0.680961	0.481389	0.526564	0.43876	0.710857	0.455902	-0.101349	0.401751	0.447267	0.445262	0.602436	-0.098841	0.417878	0.316076	0.500143	0.293811	0.456968	0.23271
TCGA-G9-6348-01A	0.547324	0.268332	0.662526	0.400342	0.333139	0.206331	0.4949	0.228653	0.520875	0.314665	0.31035	0.488344	0.292917	0.434206	0.382558	0.378852	0.50629	0.27473	0.43992	0.172664	0.306886	0.446071	0.288621	0.200761	0.18645	0.498271	0.43589	-0.140131	0.241651	0.292357	0.552082	0.71413	0.513535	0.268864	0.415644	0.70214	0.494701	0.0259756	0.454213	0.461398	0.583657	0.577526	-0.108957	0.544837	0.446312	0.578395	0.360521	0.462255	0.2914
TCGA-G9-6351-01A	0.527319	0.198967	0.694992	0.257868	0.310926	0.20202	0.440218	0.238467	0.560257	0.251922	0.242949	0.468414	0.265546	0.331909	0.361048	0.349332	0.496081	0.259202	0.41645	0.129763	0.303981	0.397083	0.227033	0.129366	0.0874859	0.433078	0.350916	-0.118567	0.163813	0.301021	0.547702	0.689478	0.46298	0.260868	0.431117	0.685859	0.442951	0.00179383	0.45554	0.457733	0.586384	0.556148	-0.0884613	0.495264	0.336959	0.571333	0.335937	0.427445	0.279382
TCGA-G9-6353-01A	0.547182	0.177164	0.669585	0.311081	0.349211	0.250745	0.43086	0.244356	0.539994	0.231467	0.222318	0.472389	0.249107	0.355956	0.365587	0.352951	0.496469	0.247485	0.416515	0.167987	0.301871	0.41771	0.228969	0.123957	0.0780083	0.416878	0.331944	-0.105319	0.153392	0.304158	0.533733	0.680001	0.457357	0.322794	0.444881	0.686048	0.447812	0.0133028	0.441482	0.446967	0.560703	0.561046	-0.103384	0.500924	0.322102	0.548457	0.3493	0.420249	0.315566
TCGA-G9-6354-01A	0.514267	0.210543	0.649639	0.271122	0.273602	0.151383	0.413612	0.219332	0.529023	0.204798	0.222754	0.498062	0.272484	0.263118	0.327674	0.325293	0.487521	0.254461	0.396949	0.130569	0.289198	0.372234	0.234776	0.149327	0.0884718	0.448707	0.357159	-0.133061	0.151945	0.274645	0.53414	0.703964	0.475243	0.223033	0.380082	0.705599	0.436574	0.0599684	0.437037	0.456951	0.554615	0.549505	-0.088752	0.434406	0.321359	0.56654	0.269887	0.436023	0.24778
TCGA-G9-6356-01A	0.529745	0.289574	0.644582	0.343112	0.358126	0.243373	0.4755	0.209734	0.482587	0.311384	0.316187	0.470817	0.29599	0.401897	0.375398	0.379477	0.478402	0.286428	0.418217	0.191126	0.304496	0.40018	0.281763	0.228859	0.163328	0.52211	0.470196	-0.120547	0.255392	0.319948	0.538127	0.707699	0.475749	0.274283	0.454592	0.683059	0.471579	0.0524729	0.438042	0.464723	0.574948	0.561649	-0.120444	0.521481	0.376927	0.561229	0.371534	0.435872	0.314029
TCGA-G9-6361-01A	0.530898	0.199051	0.635408	0.308319	0.317704	0.175249	0.4314	0.221381	0.50981	0.259949	0.226207	0.485209	0.279712	0.396888	0.359663	0.339359	0.475901	0.265131	0.393851	0.115253	0.292341	0.386095	0.246474	0.116317	0.080705	0.428065	0.347204	-0.158761	0.1769	0.303439	0.534209	0.704285	0.468837	0.296047	0.424082	0.687529	0.442562	-0.0408802	0.437994	0.458224	0.562309	0.540957	-0.0972896	0.515659	0.301695	0.545794	0.352818	0.411843	0.283367
TCGA-G9-6362-01A	0.499629	0.216576	0.664453	0.317959	0.270366	0.112338	0.414305	0.192403	0.482854	0.191048	0.244765	0.484975	0.298925	0.309369	0.288296	0.301211	0.456938	0.282025	0.385441	0.153283	0.271933	0.34889	0.251338	0.184696	0.0965312	0.459114	0.362766	-0.162121	0.201475	0.278211	0.529415	0.702943	0.440362	0.217504	0.43614	0.699422	0.41283	0.105316	0.434453	0.4665	0.554317	0.542434	-0.0576064	0.484938	0.30715	0.556202	0.335566	0.421389	0.275891
TCGA-G9-6363-01A	0.535125	0.220257	0.651804	0.327954	0.269664	0.125268	0.436552	0.226667	0.526526	0.242597	0.257763	0.497803	0.368975	0.362743	0.316869	0.348647	0.516542	0.32667	0.422867	0.0234829	0.304537	0.378757	0.265794	0.187052	0.11158	0.458556	0.388289	-0.151357	0.222244	0.294946	0.588998	0.736994	0.469315	0.268871	0.360148	0.732495	0.429215	0.00925743	0.465762	0.469449	0.601789	0.541203	-0.0511738	0.504925	0.315658	0.582172	0.303747	0.420564	0.193436
TCGA-G9-6364-01A	0.533141	0.2165	0.658593	0.360763	0.344569	0.221522	0.431865	0.254331	0.517265	0.261618	0.232586	0.438409	0.26515	0.394143	0.364007	0.348923	0.477842	0.269627	0.408924	0.220031	0.311934	0.375172	0.248597	0.165716	0.104467	0.440305	0.370262	-0.148076	0.200855	0.311729	0.53798	0.686468	0.424368	0.29611	0.433124	0.675753	0.416158	0.0168068	0.45065	0.464329	0.596926	0.522003	-0.0931393	0.495655	0.292754	0.555858	0.377819	0.397963	0.272337
TCGA-G9-6365-01A	0.535813	0.243768	0.629545	0.339707	0.343547	0.230915	0.459172	0.204988	0.51245	0.307686	0.276818	0.47496	0.293689	0.429466	0.352037	0.362153	0.4929	0.274895	0.424048	0.128422	0.285138	0.411264	0.272842	0.189037	0.116486	0.446141	0.38105	-0.144192	0.214905	0.307992	0.538146	0.715938	0.498244	0.312701	0.44476	0.695464	0.453714	-0.0309732	0.440664	0.474418	0.562984	0.555835	-0.111944	0.523485	0.352843	0.553856	0.382519	0.426709	0.306661
TCGA-G9-6366-01A	0.520906	0.188119	0.665416	0.25647	0.275613	0.117135	0.400153	0.234081	0.518068	0.189399	0.20701	0.484383	0.261089	0.267455	0.344014	0.330009	0.489208	0.249809	0.409877	0.111578	0.298256	0.333966	0.20806	0.121272	0.0732543	0.474309	0.378368	-0.159182	0.133994	0.287279	0.545476	0.692284	0.492238	0.210101	0.384988	0.701417	0.424813	-0.0746861	0.434993	0.464821	0.6155	0.533125	-0.0977038	0.442592	0.272956	0.581811	0.291715	0.422639	0.221531
TCGA-G9-6367-01A	0.548157	0.20656	0.678071	0.280195	0.351942	0.275108	0.456977	0.239848	0.545449	0.233132	0.250065	0.451557	0.255081	0.356921	0.377181	0.364404	0.501591	0.24811	0.4189	0.156629	0.307836	0.426416	0.233041	0.148496	0.109786	0.482962	0.391836	-0.103494	0.17826	0.304746	0.535213	0.666809	0.39366	0.322908	0.446728	0.688688	0.46437	-0.0381449	0.444406	0.458032	0.588763	0.550807	-0.0953639	0.500768	0.351162	0.55482	0.378161	0.436672	0.265553
TCGA-G9-6369-01A	0.52522	0.169403	0.685861	0.274266	0.278305	0.152785	0.401956	0.250539	0.554793	0.196513	0.194051	0.500782	0.332819	0.3026	0.339129	0.327791	0.496499	0.310875	0.418929	0.115689	0.306268	0.351984	0.222876	0.101932	0.0559765	0.41301	0.33509	-0.177793	0.130209	0.301848	0.56682	0.696884	0.503866	0.238171	0.398737	0.699864	0.426319	-0.0751418	0.449405	0.469097	0.555958	0.562636	-0.0848541	0.438397	0.295683	0.580351	0.29432	0.427839	0.207535
TCGA-G9-6370-01A	0.531988	0.226562	0.679623	0.339163	0.374779	0.30564	0.482626	0.23856	0.548471	0.252095	0.268967	0.44464	0.272969	0.409977	0.4073	0.397236	0.479853	0.264016	0.432069	0.179714	0.312019	0.461695	0.276086	0.177916	0.148402	0.480029	0.400394	-0.0532297	0.225552	0.326287	0.52903	0.672296	0.415806	0.305496	0.463095	0.667145	0.498516	0.0246487	0.444206	0.454494	0.593127	0.546569	-0.120969	0.567761	0.434479	0.552099	0.407658	0.429512	0.2928
TCGA-G9-6371-01A	0.5241	0.183442	0.672296	0.26683	0.299934	0.174609	0.415001	0.216399	0.525094	0.182911	0.212213	0.48224	0.303716	0.279739	0.348848	0.323825	0.488936	0.29501	0.396547	0.122687	0.302337	0.340664	0.231512	0.138497	0.082861	0.472157	0.365346	-0.147319	0.146056	0.311778	0.549058	0.71741	0.524772	0.236919	0.384704	0.695116	0.421001	-0.0632111	0.436176	0.463897	0.587367	0.537548	-0.106723	0.456645	0.28985	0.587849	0.316444	0.419815	0.258048
TCGA-G9-6373-01A	0.522584	0.255135	0.612383	0.351404	0.305536	0.188928	0.452529	0.201539	0.501923	0.25369	0.270036	0.496039	0.284094	0.390785	0.330339	0.323566	0.482295	0.27909	0.39818	0.136088	0.28876	0.387299	0.275631	0.223422	0.1352	0.499527	0.410683	-0.143048	0.211199	0.288486	0.531311	0.709612	0.49199	0.264208	0.438651	0.69244	0.430543	-0.00409799	0.432708	0.464955	0.551021	0.546189	-0.102125	0.512446	0.359859	0.554597	0.327335	0.445039	0.256515
TCGA-G9-6377-01A	0.517816	0.273535	0.668892	0.302504	0.303373	0.162535	0.475835	0.220876	0.521781	0.26516	0.288102	0.47398	0.288972	0.36813	0.371212	0.361704	0.469021	0.279951	0.417741	0.113606	0.304458	0.406447	0.286816	0.230212	0.18296	0.533478	0.445629	-0.136295	0.215093	0.296119	0.554315	0.714967	0.519652	0.227334	0.413568	0.691836	0.470695	-0.0211778	0.446039	0.47184	0.565872	0.565079	-0.107408	0.517038	0.431104	0.588711	0.324585	0.444469	0.25885
TCGA-G9-6378-01A	0.545039	0.197745	0.63583	0.307319	0.338064	0.227646	0.438162	0.223552	0.509558	0.234679	0.232038	0.479292	0.285256	0.393598	0.33766	0.332717	0.514925	0.264631	0.390824	0.141898	0.297588	0.39365	0.237833	0.159929	0.0954994	0.467339	0.381425	-0.117272	0.17537	0.30472	0.51865	0.693814	0.439852	0.372025	0.44757	0.702803	0.437962	-0.0823322	0.446059	0.466566	0.558803	0.5323	-0.107651	0.508246	0.319301	0.551248	0.3826	0.427745	0.262643
TCGA-G9-6379-01A	0.518179	0.34132	0.553024	0.283614	0.328367	0.249881	0.453253	0.211368	0.505019	0.314317	0.320461	0.520236	0.273588	0.346136	0.335042	0.367382	0.47813	0.23299	0.413941	0.108338	0.277452	0.402918	0.313772	0.270898	0.156341	0.541381	0.473495	-0.097611	0.235116	0.247286	0.495824	0.686361	0.517855	0.313802	0.404899	0.691185	0.47672	-0.00506141	0.413515	0.426249	0.4591	0.601344	-0.10331	0.435516	0.365963	0.522852	0.251046	0.463479	0.279259
TCGA-G9-6384-01A	0.519019	0.254424	0.710436	0.351937	0.351313	0.210729	0.483794	0.232106	0.554886	0.231947	0.266853	0.439726	0.285765	0.382335	0.382941	0.34749	0.478292	0.28963	0.415581	0.235636	0.300714	0.431295	0.281998	0.22546	0.167679	0.483925	0.415321	-0.135811	0.208812	0.346682	0.546659	0.683947	0.437142	0.254461	0.454563	0.652226	0.470946	-0.0410646	0.430707	0.467865	0.599916	0.531612	-0.0974079	0.571825	0.433756	0.572112	0.414218	0.431724	0.299675
TCGA-G9-6385-01A	0.530463	0.198629	0.685126	0.327079	0.354338	0.239862	0.448404	0.225984	0.539415	0.256568	0.248852	0.468142	0.284207	0.37682	0.367845	0.365238	0.490022	0.273561	0.422397	0.156176	0.307975	0.415072	0.237387	0.146358	0.0991757	0.443889	0.369478	-0.11331	0.177188	0.325064	0.531531	0.689983	0.442461	0.292204	0.454326	0.674967	0.456867	-0.0402858	0.44579	0.465859	0.575673	0.554022	-0.0966102	0.499978	0.341652	0.559927	0.368881	0.423745	0.294443
TCGA-G9-6494-01A	0.530083	0.1605	0.698535	0.313601	0.312947	0.171207	0.404447	0.234578	0.555096	0.201909	0.207476	0.463858	0.289302	0.341244	0.349508	0.325937	0.476153	0.295863	0.392734	0.167036	0.31195	0.373239	0.228394	0.120618	0.087743	0.432305	0.335608	-0.14514	0.149073	0.327926	0.55172	0.692543	0.460283	0.250546	0.367514	0.67931	0.405683	-0.0552703	0.438456	0.464956	0.604606	0.545227	-0.0992769	0.498242	0.28869	0.567615	0.372099	0.394283	0.235252
TCGA-G9-6496-01A	0.510971	0.173611	0.672903	0.345945	0.306283	0.189283	0.414108	0.208277	0.550009	0.237132	0.229899	0.491624	0.354157	0.368309	0.32666	0.33635	0.483778	0.334826	0.403596	0.144862	0.295094	0.362002	0.240153	0.140772	0.090936	0.426743	0.347171	-0.160098	0.165103	0.309855	0.549455	0.692882	0.514003	0.238309	0.397525	0.691061	0.435485	-0.064485	0.43799	0.468757	0.530942	0.553971	-0.0843927	0.501518	0.326453	0.56592	0.316574	0.418632	0.282988
TCGA-G9-6498-01A	0.517115	0.306849	0.634707	0.354488	0.320215	0.223689	0.494307	0.19563	0.515146	0.304805	0.312961	0.501584	0.278527	0.410897	0.354009	0.357669	0.471847	0.273609	0.417962	0.0823556	0.294073	0.442021	0.355912	0.309412	0.231792	0.492185	0.444637	-0.148926	0.294589	0.284283	0.537674	0.706428	0.522752	0.296273	0.442016	0.681303	0.498165	-0.132365	0.431909	0.478801	0.524833	0.597956	-0.107904	0.560874	0.503757	0.572157	0.353622	0.471022	0.279272
TCGA-G9-6499-01A	0.523246	0.220204	0.683728	0.267073	0.296104	0.160485	0.441339	0.234158	0.553095	0.269221	0.276214	0.491724	0.291412	0.319958	0.359082	0.357839	0.499506	0.280505	0.426067	0.1168	0.304953	0.390496	0.246148	0.195482	0.151434	0.442509	0.394413	-0.155967	0.190167	0.282631	0.556606	0.717784	0.546771	0.239936	0.421741	0.700908	0.450777	-0.0544138	0.444653	0.464152	0.571844	0.590136	-0.110847	0.48302	0.395124	0.593373	0.313162	0.444893	0.235747
TCGA-G9-7509-01A	0.523678	0.170927	0.693095	0.279644	0.319058	0.19218	0.427842	0.230883	0.549303	0.209561	0.19575	0.467408	0.274306	0.335472	0.352824	0.332033	0.492077	0.275198	0.408816	0.152511	0.299883	0.394143	0.229176	0.114606	0.0696951	0.393414	0.306591	-0.134312	0.131337	0.319474	0.543545	0.691963	0.435697	0.265082	0.422238	0.676298	0.431652	-0.0456396	0.436442	0.456479	0.588519	0.531044	-0.113934	0.493839	0.327862	0.579159	0.349302	0.403321	0.29323
TCGA-G9-7510-01A	0.537479	0.241235	0.684848	0.375445	0.352053	0.229195	0.487653	0.238963	0.555368	0.271807	0.273616	0.470314	0.283144	0.413141	0.398539	0.380733	0.490689	0.270883	0.437382	0.165916	0.309621	0.437313	0.272244	0.208585	0.173127	0.487839	0.415435	-0.128567	0.22652	0.307155	0.551169	0.692583	0.489849	0.284346	0.46281	0.683334	0.477006	-0.04286	0.440626	0.462016	0.569683	0.568932	-0.130518	0.539285	0.453974	0.587652	0.371682	0.439119	0.275995
TCGA-G9-7519-01A	0.542516	0.174613	0.681564	0.271284	0.307767	0.194715	0.442688	0.229445	0.576906	0.229625	0.239056	0.481441	0.277293	0.347081	0.362034	0.346696	0.524123	0.26628	0.406876	0.112735	0.307351	0.391592	0.238958	0.143662	0.0929287	0.440712	0.348716	-0.158647	0.164187	0.287257	0.558965	0.694949	0.46977	0.384099	0.388773	0.708492	0.439435	-0.0966276	0.433422	0.469616	0.565843	0.562012	-0.0799517	0.460828	0.344927	0.574265	0.328991	0.427994	0.229131
TCGA-G9-7521-01A	0.514896	0.317594	0.688415	0.3649	0.328783	0.148984	0.462985	0.208648	0.532498	0.239168	0.312646	0.456875	0.325809	0.412033	0.33953	0.320923	0.473118	0.31985	0.411004	0.138105	0.311429	0.404838	0.286151	0.236041	0.185008	0.611745	0.505657	-0.149281	0.225424	0.329319	0.577412	0.699678	0.423614	0.307869	0.409688	0.67445	0.450088	-0.103934	0.43885	0.492611	0.606344	0.565895	-0.104335	0.54981	0.395695	0.581712	0.34577	0.426507	0.206528
TCGA-G9-7522-01A	0.535307	0.235714	0.672748	0.343064	0.335424	0.214017	0.459612	0.238428	0.521817	0.280828	0.282748	0.457961	0.255591	0.380093	0.374544	0.367972	0.501399	0.256322	0.419319	0.189449	0.314198	0.410186	0.257781	0.186904	0.130403	0.457661	0.394386	-0.141777	0.216681	0.310523	0.54771	0.689789	0.428657	0.274499	0.427796	0.69182	0.454644	-0.00972016	0.437397	0.45858	0.60076	0.565759	-0.115041	0.511119	0.374799	0.578326	0.351296	0.429811	0.264069
TCGA-G9-7523-01A	0.540671	0.306902	0.636627	0.485031	0.387446	0.250135	0.47908	0.211525	0.482637	0.302383	0.295493	0.453658	0.263615	0.548099	0.3499	0.331612	0.482584	0.250238	0.419466	0.205924	0.296384	0.455509	0.338581	0.273931	0.189775	0.493118	0.434112	-0.139703	0.26318	0.31271	0.534951	0.684051	0.420249	0.556722	0.4869	0.685748	0.443896	-0.076002	0.428049	0.463623	0.561477	0.566283	-0.138887	0.549538	0.406369	0.544013	0.430085	0.439638	0.282753
TCGA-G9-7525-01A	0.514671	0.210505	0.64693	0.349591	0.301853	0.143574	0.408439	0.21357	0.484395	0.252465	0.229249	0.512301	0.329478	0.377762	0.318947	0.329926	0.494481	0.293437	0.410441	0.180943	0.286056	0.345576	0.23023	0.112048	0.0863898	0.440232	0.3599	-0.158545	0.174454	0.312405	0.545216	0.718726	0.486354	0.25076	0.390856	0.702752	0.42074	0.0352284	0.43792	0.461395	0.573812	0.560035	-0.107718	0.485021	0.276048	0.568423	0.314777	0.416129	0.2345
TCGA-G9-A9S0-01A	0.517069	0.265138	0.628845	0.21583	0.274397	0.129523	0.419642	0.22026	0.538065	0.212158	0.245508	0.501126	0.394637	0.29206	0.34577	0.339246	0.520703	0.362431	0.442916	0.100523	0.29515	0.346999	0.247967	0.191585	0.101822	0.518033	0.429985	-0.187704	0.164155	0.339764	0.596081	0.735101	0.539547	0.200196	0.348894	0.714072	0.423136	-0.0702285	0.443614	0.476521	0.57263	0.575242	-0.0939164	0.45497	0.283796	0.587888	0.266857	0.434461	0.234442
TCGA-G9-A9S4-01A	0.484741	0.153837	0.629934	0.259487	0.281825	0.117967	0.39941	0.18504	0.512586	0.148072	0.174097	0.507336	0.396584	0.26025	0.302143	0.299008	0.450925	0.366456	0.400383	0.184289	0.27396	0.36317	0.216255	0.126686	0.0539837	0.343104	0.275315	-0.140645	0.0988951	0.347719	0.524196	0.7302	0.513464	0.198129	0.435317	0.700064	0.439337	0.0428934	0.408914	0.463545	0.522074	0.517162	-0.0700129	0.479406	0.328582	0.556656	0.307068	0.420309	0.285055
TCGA-G9-A9S7-01A	0.502288	0.215043	0.642994	0.272036	0.270251	0.125865	0.377619	0.203865	0.519363	0.199075	0.213544	0.516908	0.335148	0.251642	0.320852	0.326927	0.479046	0.310259	0.384518	0.145	0.292931	0.329597	0.234346	0.154591	0.0796097	0.466971	0.381463	-0.127613	0.163913	0.30863	0.539321	0.719708	0.502649	0.182455	0.401104	0.704424	0.415686	0.0382942	0.444188	0.471057	0.556151	0.536265	-0.0962489	0.429884	0.275364	0.562975	0.269289	0.424365	0.250781
TCGA-H9-7775-01A	0.526215	0.196278	0.680455	0.330402	0.323412	0.161831	0.419978	0.230022	0.503928	0.263818	0.232039	0.465435	0.27717	0.362195	0.343493	0.321652	0.499268	0.276839	0.400713	0.145126	0.303573	0.358152	0.240579	0.129427	0.0833837	0.40151	0.324049	-0.158522	0.168078	0.329735	0.542627	0.7007	0.44876	0.251243	0.404602	0.680868	0.40011	-0.0548486	0.432795	0.469057	0.609706	0.539224	-0.103915	0.494719	0.251245	0.563068	0.359819	0.388452	0.281642
TCGA-H9-A6BX-01A	0.542617	0.266639	0.599308	0.409933	0.40222	0.278549	0.472122	0.196067	0.482129	0.285251	0.290501	0.467491	0.293566	0.462681	0.35031	0.35601	0.473818	0.273485	0.407708	0.161265	0.2987	0.431106	0.291363	0.261425	0.14887	0.497339	0.429454	-0.130782	0.245305	0.33002	0.51066	0.689579	0.429862	0.364903	0.485571	0.678434	0.473017	-0.0417593	0.417125	0.455124	0.541926	0.573133	-0.117912	0.522301	0.380435	0.53521	0.399859	0.442286	0.347237
TCGA-H9-A6BY-01A	0.517007	0.158281	0.584853	0.243875	0.281189	0.123444	0.365708	0.216962	0.487882	0.196142	0.177374	0.527342	0.345682	0.274204	0.297384	0.307616	0.483669	0.301643	0.398639	0.0802406	0.270406	0.314458	0.214946	0.0711056	0.0160187	0.369241	0.279088	-0.145876	0.0800978	0.29491	0.512874	0.735313	0.568272	0.260877	0.37943	0.718242	0.401559	-0.050528	0.435544	0.445272	0.506754	0.558099	-0.0840807	0.405624	0.199719	0.552198	0.243128	0.398266	0.260435
TCGA-HC-7075-01A	0.502035	0.22854	0.668075	0.218223	0.288431	0.145946	0.395981	0.214033	0.516719	0.190342	0.224116	0.48638	0.317951	0.256847	0.325417	0.304551	0.490726	0.296631	0.377155	0.109186	0.312143	0.313001	0.243404	0.191583	0.105198	0.540658	0.421799	-0.169439	0.153299	0.324844	0.542835	0.706296	0.506554	0.214928	0.369399	0.678022	0.403034	-0.099767	0.424416	0.483443	0.594038	0.552523	-0.121127	0.42202	0.283	0.579646	0.297191	0.419689	0.20591
TCGA-HC-7077-01A	0.505787	0.168555	0.664391	0.21263	0.271145	0.114023	0.376084	0.2339	0.510988	0.170211	0.180393	0.475107	0.334394	0.205373	0.333344	0.322288	0.475939	0.327983	0.397776	0.134713	0.295646	0.30808	0.20749	0.0989577	0.057116	0.462382	0.352494	-0.155109	0.112225	0.354875	0.548962	0.711435	0.531393	0.164983	0.370493	0.67381	0.398808	-0.0768716	0.44811	0.47106	0.586539	0.526463	-0.0962321	0.424685	0.218601	0.576847	0.271762	0.404236	0.252496
TCGA-HC-7078-01A	0.522688	0.229639	0.685621	0.349479	0.325742	0.186161	0.428678	0.236929	0.517712	0.255288	0.26797	0.482163	0.311437	0.331204	0.356231	0.342409	0.485963	0.290184	0.409279	0.166984	0.310386	0.375792	0.238379	0.161468	0.139557	0.454729	0.396296	-0.137042	0.201875	0.324817	0.533079	0.698711	0.482361	0.230155	0.431344	0.675422	0.438781	-0.0446731	0.434722	0.450635	0.567812	0.538206	-0.129045	0.496002	0.349047	0.571522	0.334542	0.423054	0.277959
TCGA-HC-7079-01A	0.487698	0.546949	0.615177	0.375974	0.393253	0.260911	0.583138	0.160098	0.45216	0.355803	0.450646	0.453969	0.323596	0.46761	0.367513	0.361933	0.420656	0.311704	0.382882	0.159494	0.316348	0.447795	0.437394	0.519785	0.411841	0.676418	0.649843	-0.139773	0.378738	0.365107	0.530721	0.680411	0.398352	0.252813	0.473079	0.607995	0.524555	-0.0559115	0.383646	0.482741	0.567911	0.560762	-0.152538	0.588955	0.623594	0.558865	0.392041	0.468478	0.323988
TCGA-HC-7080-01A	0.494377	0.167578	0.663826	0.253837	0.287511	0.137704	0.355281	0.203551	0.504486	0.175256	0.182864	0.491173	0.315812	0.211222	0.312481	0.284277	0.468062	0.294588	0.375382	0.154905	0.303421	0.306164	0.199846	0.120171	0.059122	0.456772	0.352337	-0.160839	0.115446	0.321816	0.51939	0.691891	0.4844	0.15513	0.386414	0.670043	0.408997	-0.0462018	0.410319	0.455886	0.560359	0.509444	-0.116133	0.44086	0.260791	0.577412	0.270017	0.428692	0.265014
TCGA-HC-7081-01A	0.531049	0.275865	0.684528	0.481276	0.370814	0.161887	0.453495	0.249431	0.537488	0.308815	0.271249	0.430519	0.293498	0.490499	0.356788	0.336565	0.486812	0.299945	0.416819	0.22005	0.303373	0.383527	0.290374	0.207673	0.163427	0.449418	0.393522	-0.167565	0.259228	0.380431	0.552348	0.679786	0.413728	0.273152	0.472815	0.66909	0.432354	0.0184652	0.458872	0.470829	0.603246	0.555672	-0.111521	0.575108	0.32636	0.557667	0.408466	0.409006	0.327873
TCGA-HC-7209-01A	0.51012	0.241225	0.688067	0.382791	0.312383	0.184783	0.471647	0.24778	0.546377	0.266236	0.276326	0.459177	0.309825	0.364998	0.374256	0.370592	0.483798	0.302131	0.431191	0.164083	0.300133	0.414094	0.269394	0.214687	0.169208	0.509101	0.423301	-0.120911	0.206458	0.347894	0.560142	0.688076	0.464789	0.21286	0.427719	0.668238	0.486769	-0.0406073	0.453268	0.461903	0.607907	0.545467	-0.103044	0.535541	0.456079	0.580253	0.344257	0.439788	0.27202
TCGA-HC-7210-01A	0.515167	0.258014	0.716823	0.419179	0.365906	0.216503	0.483683	0.238892	0.560864	0.286828	0.288538	0.423459	0.262838	0.442456	0.4	0.37073	0.465896	0.271599	0.436864	0.229223	0.313047	0.436864	0.299004	0.239736	0.213862	0.454142	0.414907	-0.127632	0.240062	0.351426	0.546041	0.655584	0.398498	0.265515	0.490719	0.629364	0.457771	-0.0347684	0.432081	0.451638	0.611351	0.527515	-0.135779	0.572921	0.485994	0.576039	0.403694	0.419132	0.290889
TCGA-HC-7211-01A	0.500518	0.223376	0.718172	0.332074	0.327499	0.184994	0.4772	0.218364	0.529038	0.28309	0.293702	0.44979	0.314596	0.348055	0.387083	0.345018	0.468125	0.314582	0.410139	0.179186	0.315225	0.409935	0.269922	0.236204	0.204798	0.466984	0.424342	-0.144116	0.243821	0.356997	0.559499	0.685124	0.459238	0.186794	0.414745	0.629935	0.466871	-0.0703744	0.420073	0.468731	0.616198	0.534239	-0.119374	0.537431	0.493153	0.599976	0.360206	0.405776	0.247815
TCGA-HC-7212-01A	0.504455	0.188529	0.684514	0.355832	0.302772	0.144781	0.394972	0.215097	0.514129	0.194774	0.211016	0.455551	0.321289	0.335606	0.319277	0.301372	0.468608	0.33109	0.388576	0.19547	0.300992	0.348909	0.245965	0.144778	0.108644	0.387086	0.318476	-0.167504	0.172442	0.379713	0.540303	0.710911	0.500942	0.179139	0.425791	0.654681	0.385	-0.013815	0.434276	0.465787	0.609045	0.515613	-0.101554	0.528247	0.303959	0.567466	0.35305	0.383604	0.305521
TCGA-HC-7213-01A	0.50811	0.253681	0.637718	0.351324	0.324362	0.170147	0.466898	0.217043	0.542792	0.26252	0.258498	0.481838	0.421347	0.382333	0.360494	0.369854	0.467548	0.391596	0.424339	0.119783	0.306995	0.389431	0.27423	0.202453	0.143744	0.504882	0.416167	-0.158353	0.213593	0.38129	0.575765	0.723449	0.486254	0.222122	0.422064	0.671963	0.449678	-0.0461471	0.446967	0.484516	0.56225	0.572449	-0.0894714	0.525311	0.37386	0.562125	0.310483	0.430867	0.274117
TCGA-HC-7230-01A	0.498064	0.171243	0.682763	0.27662	0.283485	0.137502	0.407531	0.196051	0.509916	0.176096	0.197971	0.482313	0.348399	0.257904	0.332923	0.314701	0.483459	0.335999	0.412373	0.148813	0.294968	0.345801	0.213656	0.0915898	0.0609818	0.403194	0.314776	-0.157692	0.14476	0.361783	0.546451	0.726991	0.531685	0.183244	0.413906	0.664616	0.406545	-0.0163944	0.428773	0.459602	0.589049	0.533168	-0.0970029	0.475064	0.321592	0.597075	0.302979	0.412256	0.28192
TCGA-HC-7231-01A	0.500914	0.288633	0.668257	0.298444	0.302057	0.157692	0.418814	0.236978	0.522514	0.25635	0.274395	0.467179	0.296142	0.316884	0.348504	0.348334	0.485122	0.28921	0.398804	0.161883	0.314556	0.336131	0.260524	0.20745	0.133276	0.527732	0.444727	-0.155658	0.202085	0.338042	0.553658	0.708078	0.474578	0.189763	0.40274	0.675459	0.42006	-0.0177231	0.452436	0.466102	0.604191	0.565082	-0.109502	0.497245	0.309617	0.574416	0.314614	0.41617	0.248604
TCGA-HC-7232-01A	0.515593	0.169055	0.662505	0.369939	0.326929	0.191328	0.407833	0.224361	0.485863	0.237672	0.221463	0.458565	0.278806	0.35393	0.335592	0.327196	0.483924	0.276496	0.387204	0.211374	0.311865	0.345218	0.232531	0.126817	0.0820743	0.407859	0.324967	-0.157338	0.161805	0.34958	0.517462	0.701152	0.43264	0.257231	0.44802	0.672442	0.406704	0.0530141	0.440558	0.468859	0.601054	0.536179	-0.107548	0.521137	0.262891	0.548083	0.360525	0.397452	0.324983
TCGA-HC-7233-01A	0.533926	0.349127	0.688213	0.329314	0.329512	0.170561	0.474715	0.241603	0.487957	0.30319	0.341772	0.448879	0.295398	0.389872	0.373421	0.349273	0.501314	0.294433	0.424653	0.138575	0.31128	0.391874	0.293157	0.27176	0.203839	0.61186	0.546776	-0.175982	0.259909	0.331162	0.552013	0.704767	0.501526	0.24694	0.385709	0.68394	0.439697	-0.00655867	0.434884	0.466305	0.609686	0.563562	-0.121129	0.514346	0.397028	0.587672	0.359187	0.440859	0.227639
TCGA-HC-7736-01A	0.515863	0.22328	0.704961	0.355402	0.352329	0.199146	0.485535	0.195536	0.528854	0.255562	0.268904	0.441314	0.321222	0.39552	0.403469	0.370323	0.471101	0.322218	0.424817	0.183834	0.308991	0.419608	0.281826	0.206999	0.183321	0.462243	0.389902	-0.131783	0.216166	0.366527	0.546435	0.691733	0.478226	0.247669	0.458117	0.639719	0.462169	-0.0778252	0.42751	0.463287	0.603473	0.543419	-0.126075	0.576588	0.463943	0.583043	0.398453	0.426232	0.296025
TCGA-HC-7737-01A	0.524072	0.297718	0.69944	0.40945	0.352207	0.196837	0.520966	0.227114	0.552718	0.325237	0.325352	0.450122	0.290099	0.448149	0.409951	0.379331	0.482505	0.284684	0.433655	0.171866	0.324741	0.456195	0.315833	0.258115	0.234461	0.497506	0.457659	-0.127984	0.262106	0.333308	0.558583	0.681822	0.464417	0.257601	0.482773	0.648073	0.49415	-0.0710492	0.437508	0.468772	0.593095	0.554498	-0.135061	0.567608	0.530886	0.587609	0.399012	0.454363	0.304588
TCGA-HC-7738-01A	0.53057	0.182949	0.694753	0.251194	0.295822	0.145251	0.39899	0.243407	0.525363	0.212574	0.220122	0.472709	0.338929	0.28056	0.350023	0.341946	0.50015	0.329672	0.402803	0.145441	0.307373	0.340709	0.22665	0.13976	0.0816636	0.42804	0.36066	-0.156863	0.145153	0.341308	0.553318	0.708115	0.492397	0.225182	0.411431	0.684792	0.405021	-0.0564426	0.441959	0.467704	0.589317	0.555752	-0.107773	0.43239	0.279922	0.57312	0.325631	0.400252	0.243917
TCGA-HC-7740-01A	0.538987	0.23501	0.676558	0.356659	0.3788	0.263849	0.508431	0.245005	0.549897	0.273291	0.282817	0.43746	0.249167	0.419869	0.415762	0.39203	0.47516	0.254944	0.421887	0.174985	0.321072	0.456631	0.285995	0.207869	0.185318	0.509877	0.428033	-0.0850468	0.228817	0.331884	0.526974	0.662515	0.412234	0.328004	0.464815	0.657065	0.502392	-0.0303061	0.437525	0.461104	0.575561	0.540719	-0.115188	0.572416	0.471006	0.555749	0.411586	0.433105	0.311741
TCGA-HC-7742-01A	0.541374	0.158655	0.686357	0.351376	0.336172	0.219443	0.431128	0.227251	0.532033	0.215648	0.226949	0.460405	0.345887	0.392249	0.370007	0.363193	0.486702	0.345328	0.420222	0.163077	0.308183	0.398712	0.238428	0.128643	0.10167	0.426899	0.344608	-0.14376	0.169864	0.346075	0.55733	0.697885	0.452434	0.280607	0.443351	0.684172	0.416621	-0.0540053	0.452937	0.472115	0.590221	0.547446	-0.0997263	0.499346	0.320793	0.578652	0.367355	0.413772	0.238299
TCGA-HC-7744-01A	0.52093	0.1891	0.680889	0.299458	0.291774	0.144407	0.399009	0.223587	0.528258	0.227189	0.211969	0.481859	0.393625	0.273317	0.343533	0.340825	0.481627	0.372663	0.412049	0.168696	0.311094	0.331474	0.219925	0.142022	0.0771566	0.406479	0.344954	-0.155991	0.150912	0.377835	0.564918	0.731618	0.522602	0.192175	0.396367	0.684966	0.421604	-0.0274974	0.447193	0.466236	0.599331	0.548759	-0.0863597	0.475699	0.285421	0.574127	0.319878	0.401179	0.265532
TCGA-HC-7745-01A	0.527955	0.283797	0.665494	0.37897	0.369663	0.242252	0.490389	0.213831	0.509912	0.278666	0.294959	0.460877	0.271695	0.42765	0.366644	0.359538	0.475259	0.256039	0.417063	0.143287	0.297207	0.429047	0.300641	0.265986	0.191117	0.516086	0.448618	-0.127497	0.251326	0.315932	0.523324	0.689187	0.469758	0.281063	0.455729	0.674174	0.484866	-0.0513246	0.422466	0.451472	0.578105	0.556119	-0.142744	0.5556	0.434476	0.550203	0.3736	0.441401	0.320007
TCGA-HC-7747-01A	0.526156	0.314731	0.671337	0.264703	0.331312	0.228665	0.481319	0.242259	0.535834	0.301445	0.318245	0.477414	0.291389	0.350222	0.363054	0.362645	0.484141	0.275241	0.42314	0.131055	0.313296	0.404222	0.280963	0.25465	0.161121	0.530201	0.468663	-0.12579	0.237732	0.294351	0.551456	0.702678	0.483735	0.235845	0.401504	0.680752	0.47559	0.0144093	0.444374	0.457217	0.583027	0.574948	-0.0988472	0.505788	0.368037	0.559592	0.34058	0.445769	0.266578
TCGA-HC-7748-01A	0.503804	0.277397	0.70897	0.372364	0.34811	0.196511	0.488745	0.235466	0.539613	0.273141	0.287387	0.424309	0.270665	0.419054	0.381687	0.355838	0.479554	0.284113	0.411078	0.198787	0.306133	0.412886	0.282923	0.231471	0.176239	0.529086	0.445705	-0.134955	0.234479	0.358225	0.548303	0.678219	0.420517	0.248464	0.447626	0.641678	0.461092	-0.0370465	0.429382	0.46017	0.616872	0.530004	-0.108136	0.562118	0.433079	0.577171	0.396129	0.422155	0.285869
TCGA-HC-7749-01A	0.515042	0.223181	0.639106	0.328506	0.309593	0.1711	0.415797	0.235154	0.502508	0.219919	0.238283	0.472842	0.285717	0.342525	0.340127	0.32829	0.490317	0.277126	0.393443	0.143598	0.311935	0.345698	0.240879	0.156184	0.10913	0.488265	0.404831	-0.165094	0.177383	0.323342	0.540176	0.707462	0.484798	0.230771	0.392493	0.688885	0.433862	-0.0656267	0.445251	0.458184	0.594297	0.532956	-0.114638	0.496042	0.2975	0.565617	0.342517	0.416967	0.255513
TCGA-HC-7750-01A	0.54687	0.186358	0.656379	0.309103	0.362488	0.216837	0.431805	0.234249	0.523671	0.281741	0.260433	0.462908	0.289594	0.374436	0.376736	0.370532	0.497213	0.285104	0.410075	0.130146	0.31611	0.380587	0.244698	0.15324	0.0915619	0.427722	0.358229	-0.138864	0.190254	0.333007	0.52817	0.690412	0.45901	0.36698	0.430409	0.686522	0.435911	-0.082093	0.437294	0.46633	0.575011	0.558123	-0.114418	0.473543	0.295856	0.553408	0.378517	0.409428	0.26509
TCGA-HC-7752-01A	0.488779	0.179689	0.588294	0.237223	0.287172	0.148219	0.368318	0.187929	0.472349	0.224939	0.220109	0.479901	0.236893	0.278435	0.299729	0.301525	0.451744	0.221233	0.365548	0.0839493	0.279125	0.319523	0.211489	0.113333	0.0638814	0.410952	0.326328	-0.167339	0.146395	0.296338	0.470241	0.659161	0.500634	0.246919	0.333605	0.644809	0.398935	-0.0470026	0.39131	0.447867	0.487065	0.537018	-0.110616	0.433325	0.221822	0.524523	0.260985	0.403762	0.247814
TCGA-HC-7818-01A	0.52413	0.252612	0.682627	0.311305	0.337873	0.198963	0.459862	0.218115	0.511212	0.281097	0.298733	0.462522	0.284773	0.35702	0.378054	0.365059	0.487945	0.280716	0.41212	0.169476	0.31713	0.395315	0.25967	0.224614	0.171081	0.467937	0.424994	-0.154841	0.230114	0.332662	0.543059	0.698801	0.481493	0.248163	0.406693	0.668422	0.448791	-0.0482325	0.434528	0.474421	0.591688	0.569915	-0.122094	0.508489	0.391306	0.580909	0.342948	0.423788	0.278778
TCGA-HC-7819-01A	0.504277	0.188659	0.682129	0.282443	0.284346	0.114689	0.413891	0.216133	0.519079	0.193945	0.197905	0.473105	0.315943	0.260589	0.329872	0.310912	0.478364	0.307837	0.393762	0.148604	0.293743	0.348992	0.232663	0.150232	0.0848009	0.424639	0.334809	-0.150721	0.131105	0.339701	0.552764	0.713434	0.505751	0.176518	0.372213	0.680773	0.418988	-0.0464933	0.434175	0.455116	0.59649	0.525263	-0.107088	0.477628	0.319614	0.600341	0.305678	0.405973	0.255539
TCGA-HC-7820-01A	0.524068	0.205771	0.680962	0.23676	0.303708	0.156327	0.403193	0.234683	0.52982	0.224149	0.235478	0.466689	0.265625	0.266865	0.3568	0.33366	0.48871	0.257511	0.390763	0.148818	0.295703	0.342526	0.218365	0.134357	0.0852957	0.510639	0.389091	-0.136001	0.12588	0.316281	0.540236	0.698152	0.486578	0.232086	0.399587	0.685399	0.414809	-0.0496631	0.427436	0.456412	0.588215	0.53261	-0.110114	0.430296	0.268714	0.578268	0.317555	0.419227	0.266783
TCGA-HC-7821-01A	0.484412	0.288213	0.684887	0.443947	0.338208	0.153894	0.437292	0.226004	0.534238	0.23528	0.255511	0.437615	0.286718	0.436641	0.302105	0.27823	0.466945	0.302369	0.397232	0.207565	0.29609	0.37935	0.273379	0.229405	0.175352	0.502627	0.419391	-0.179041	0.221999	0.350503	0.548888	0.685694	0.450569	0.201808	0.441332	0.654708	0.416506	0.0174132	0.42092	0.45519	0.580811	0.528208	-0.0951002	0.548186	0.36517	0.57809	0.358784	0.407023	0.281899
TCGA-HC-8213-01A	0.502413	0.194829	0.661557	0.229588	0.248791	0.111999	0.391416	0.220314	0.4739	0.204273	0.221184	0.487103	0.290247	0.214087	0.321626	0.310912	0.487322	0.270346	0.381391	0.108589	0.300403	0.318719	0.21691	0.116297	0.0719793	0.418983	0.343153	-0.178492	0.144781	0.289371	0.540616	0.72578	0.508538	0.168792	0.346825	0.701537	0.404969	-0.00824136	0.438074	0.449988	0.603954	0.544087	-0.0892097	0.414634	0.251724	0.572258	0.278641	0.39085	0.247381
TCGA-HC-8216-01A	0.516702	0.264625	0.693869	0.288417	0.307304	0.161752	0.453668	0.225745	0.504328	0.238197	0.276936	0.482362	0.352874	0.335542	0.338304	0.336936	0.500087	0.337264	0.410818	0.104179	0.3112	0.372238	0.2478	0.206026	0.147278	0.535524	0.440827	-0.171065	0.212168	0.330248	0.539177	0.727843	0.470203	0.216265	0.382616	0.70219	0.437309	-0.0245959	0.439387	0.468357	0.592283	0.543528	-0.0700976	0.499117	0.349002	0.566275	0.342105	0.434585	0.235777
TCGA-HC-8256-01A	0.521565	0.18136	0.692951	0.233842	0.288892	0.147289	0.383464	0.243644	0.512496	0.15496	0.187348	0.480968	0.326257	0.232394	0.328058	0.311506	0.501832	0.307607	0.391264	0.121547	0.30751	0.31513	0.222431	0.135102	0.0738435	0.491935	0.373615	-0.165264	0.120062	0.326762	0.555673	0.710512	0.519421	0.188325	0.366601	0.705563	0.408992	-0.0561135	0.443376	0.466273	0.599019	0.538381	-0.0867543	0.408362	0.247118	0.587421	0.295621	0.403096	0.219922
TCGA-HC-8257-01A	0.508136	0.227982	0.658326	0.304227	0.313641	0.148381	0.411467	0.207162	0.499645	0.214001	0.235751	0.493238	0.318853	0.327809	0.326939	0.308988	0.482185	0.293666	0.395496	0.187198	0.296179	0.335888	0.242007	0.186326	0.10468	0.465987	0.389498	-0.166437	0.156147	0.32125	0.538077	0.731339	0.523025	0.185186	0.414156	0.695877	0.418009	-0.0183619	0.437289	0.454565	0.583078	0.519851	-0.118602	0.464535	0.270632	0.577087	0.33053	0.410061	0.266597
TCGA-HC-8258-01A	0.53346	0.213175	0.703186	0.272545	0.325004	0.213336	0.46426	0.23979	0.569325	0.243852	0.254719	0.478111	0.278732	0.33302	0.381419	0.374714	0.488408	0.264763	0.417449	0.127711	0.312453	0.417576	0.259412	0.179863	0.136109	0.503911	0.424536	-0.113	0.19459	0.310819	0.543259	0.687091	0.463204	0.248934	0.43838	0.682722	0.47923	-0.0559172	0.451909	0.451701	0.574909	0.565911	-0.116687	0.512852	0.416515	0.575575	0.3399	0.441695	0.263002
TCGA-HC-8259-01A	0.511105	0.182982	0.659626	0.206419	0.280271	0.137346	0.378102	0.218074	0.496315	0.197906	0.194835	0.487581	0.311975	0.250818	0.316215	0.307934	0.491243	0.299272	0.3747	0.123536	0.295066	0.308832	0.210002	0.10663	0.045646	0.440832	0.345641	-0.166844	0.110881	0.326939	0.534237	0.713434	0.497452	0.227749	0.376511	0.692849	0.391849	0.00560334	0.425941	0.45977	0.585477	0.535905	-0.102221	0.431745	0.230314	0.570694	0.29208	0.410485	0.240217
TCGA-HC-8260-01A	0.525785	0.213735	0.691407	0.268489	0.339307	0.200497	0.448685	0.2402	0.549717	0.226276	0.241006	0.476489	0.279046	0.349531	0.35242	0.347915	0.490922	0.267603	0.406365	0.130049	0.303013	0.39497	0.245708	0.150697	0.118046	0.495222	0.397335	-0.123952	0.172302	0.314445	0.546932	0.70133	0.44966	0.243535	0.3994	0.684656	0.445856	-0.0257553	0.437906	0.446295	0.594604	0.546325	-0.0953734	0.498098	0.329812	0.573431	0.34606	0.423863	0.267819
TCGA-HC-8261-01A	0.520614	0.241112	0.682375	0.264542	0.325017	0.179994	0.404694	0.266259	0.536391	0.238313	0.2491	0.491216	0.332228	0.297924	0.339492	0.331757	0.503452	0.314193	0.387089	0.112617	0.314327	0.32942	0.224364	0.159346	0.115867	0.505605	0.416767	-0.148071	0.160795	0.335265	0.536651	0.707369	0.482255	0.232131	0.410958	0.691659	0.421042	-0.0915506	0.4554	0.466536	0.56868	0.549497	-0.10316	0.438203	0.281436	0.547815	0.323101	0.418923	0.236476
TCGA-HC-8262-01A	0.51499	0.196586	0.664348	0.235853	0.310924	0.154359	0.424239	0.229018	0.508244	0.209998	0.2284	0.492497	0.324107	0.288823	0.353817	0.351347	0.484139	0.310618	0.395822	0.144514	0.302677	0.348976	0.22014	0.136358	0.0831867	0.470251	0.370157	-0.134374	0.14317	0.325306	0.551241	0.727577	0.500261	0.218581	0.389269	0.695179	0.450834	-0.0304232	0.45464	0.462079	0.582474	0.545851	-0.108511	0.46622	0.290726	0.586055	0.314308	0.415733	0.317659
TCGA-HC-8265-01A	0.525401	0.219501	0.651519	0.320878	0.330793	0.153909	0.456939	0.21949	0.512431	0.236706	0.257311	0.486938	0.324069	0.336434	0.353161	0.349806	0.476768	0.30302	0.412691	0.132795	0.310675	0.3997	0.265066	0.192043	0.145449	0.523352	0.442555	-0.132606	0.183556	0.313313	0.539799	0.714988	0.500311	0.234228	0.436033	0.683885	0.470401	0.0863046	0.426453	0.46326	0.541088	0.562322	-0.110249	0.497182	0.3901	0.594115	0.323137	0.447317	0.273026
TCGA-HC-8266-01A	0.523549	0.416199	0.650507	0.330722	0.371718	0.236283	0.510078	0.212931	0.51146	0.302663	0.364329	0.474407	0.317578	0.393423	0.357939	0.357106	0.474756	0.306206	0.400042	0.134756	0.305201	0.407632	0.3234	0.368322	0.251133	0.656222	0.582381	-0.128967	0.287606	0.325884	0.544605	0.698099	0.436197	0.252174	0.421512	0.666841	0.483568	-0.00081325	0.431551	0.468735	0.570854	0.570635	-0.128461	0.518743	0.457429	0.571823	0.367624	0.457885	0.286104
TCGA-HC-A48F-01A	0.495001	0.109373	0.637678	0.341535	0.292397	0.0851847	0.383848	0.201864	0.515942	0.209409	0.182182	0.471841	0.319857	0.301518	0.293236	0.281705	0.464002	0.311592	0.380321	0.142677	0.290906	0.335123	0.215257	0.0780066	0.0281344	0.3455	0.25774	-0.177317	0.129436	0.357333	0.52439	0.708552	0.466023	0.182155	0.417292	0.680671	0.37169	0.00140792	0.418615	0.459153	0.585555	0.491412	-0.0553322	0.487699	0.215276	0.5507	0.307208	0.359884	0.261404
TCGA-HC-A4ZV-01A	0.520778	0.288219	0.655122	0.358432	0.3247	0.156082	0.457766	0.219808	0.50421	0.223096	0.235071	0.50207	0.443727	0.404976	0.330276	0.31175	0.459562	0.41392	0.400549	0.0937346	0.291033	0.382321	0.279081	0.19275	0.150011	0.475443	0.407874	-0.150926	0.184922	0.379549	0.553179	0.733541	0.514482	0.210145	0.425582	0.679895	0.446708	-0.120745	0.442237	0.468064	0.55691	0.550524	-0.0973067	0.520056	0.383247	0.569778	0.35529	0.428055	0.255716
TCGA-HC-A631-01A	0.501589	0.175229	0.6648	0.273544	0.287594	0.119133	0.390736	0.217726	0.510461	0.195202	0.212086	0.512161	0.386555	0.314246	0.314744	0.307889	0.480187	0.370333	0.405824	0.119607	0.303415	0.338125	0.217325	0.118832	0.0758811	0.495134	0.37857	-0.1536	0.137314	0.35165	0.552916	0.732281	0.491302	0.196904	0.391778	0.695231	0.414535	-0.0923665	0.451892	0.459052	0.593571	0.521839	-0.0743808	0.475071	0.273723	0.559748	0.308207	0.417199	0.247169
TCGA-HC-A632-01A	0.492023	0.345752	0.643308	0.315296	0.329609	0.151126	0.428108	0.190947	0.449172	0.22992	0.269907	0.483387	0.337477	0.381747	0.292205	0.275019	0.436388	0.314852	0.365293	0.127005	0.29481	0.333405	0.304189	0.270075	0.148914	0.502431	0.428938	-0.170393	0.211351	0.335701	0.547092	0.724967	0.466294	0.232661	0.426784	0.668916	0.411959	-0.0625263	0.414777	0.472597	0.582261	0.536526	-0.105999	0.483292	0.293991	0.563652	0.350427	0.401875	0.286535
TCGA-HC-A6AL-01A	0.527027	0.261107	0.615527	0.290473	0.282377	0.170521	0.424355	0.229911	0.507532	0.237286	0.252181	0.523803	0.354467	0.315819	0.317838	0.335185	0.504956	0.311414	0.419933	0.132215	0.289451	0.370842	0.266306	0.203733	0.122897	0.520705	0.417795	-0.159553	0.197813	0.28011	0.542738	0.730738	0.531868	0.244647	0.359457	0.71544	0.448501	-0.0619774	0.436498	0.451931	0.517551	0.58536	-0.101202	0.441715	0.321225	0.576566	0.251872	0.437454	0.223709
TCGA-HC-A6AN-01A	0.515888	0.241743	0.623363	0.307346	0.285019	0.163884	0.405735	0.254911	0.511025	0.274352	0.251451	0.529797	0.328415	0.31934	0.312617	0.336634	0.506305	0.282325	0.406862	0.125185	0.284671	0.337392	0.242771	0.161467	0.092949	0.467906	0.379541	-0.136335	0.162761	0.285107	0.537108	0.720813	0.520451	0.242685	0.391601	0.709495	0.431759	-0.00999926	0.443518	0.45152	0.531125	0.562891	-0.103583	0.442545	0.281017	0.544064	0.255072	0.439407	0.222041
TCGA-HC-A6AO-01A	0.520536	0.271473	0.617894	0.262879	0.257594	0.106688	0.419412	0.237382	0.534737	0.253144	0.289694	0.531256	0.366567	0.25886	0.328827	0.348762	0.49691	0.316745	0.41024	0.100707	0.289024	0.365004	0.260199	0.248946	0.162624	0.48532	0.439273	-0.156746	0.194372	0.277903	0.568351	0.731592	0.565171	0.196913	0.36959	0.723093	0.437836	-0.0714647	0.446759	0.458967	0.510796	0.588673	-0.110149	0.403641	0.364196	0.594026	0.223533	0.434832	0.206488
TCGA-HC-A6AP-01A	0.538958	0.268319	0.599165	0.308739	0.316498	0.202485	0.434278	0.244451	0.515774	0.298799	0.290339	0.516151	0.319098	0.355372	0.347819	0.382061	0.502058	0.269219	0.415682	0.079264	0.288486	0.381658	0.264924	0.195864	0.121238	0.479273	0.421841	-0.10887	0.204167	0.253664	0.530037	0.708251	0.506959	0.302236	0.41005	0.71519	0.456239	-0.013629	0.434304	0.438497	0.497398	0.593399	-0.108085	0.423576	0.334304	0.542931	0.26627	0.450245	0.243391
TCGA-HC-A6AQ-01A	0.525255	0.211323	0.601449	0.230127	0.289733	0.183867	0.39988	0.239976	0.501502	0.228624	0.236964	0.519476	0.285905	0.276422	0.331173	0.340562	0.501539	0.247793	0.403601	0.0721499	0.291166	0.352195	0.237983	0.147884	0.0718469	0.463862	0.368761	-0.120775	0.149938	0.257743	0.5179	0.71278	0.524247	0.262123	0.381804	0.715513	0.435116	-0.0271611	0.444777	0.437367	0.516499	0.576297	-0.107162	0.406591	0.258045	0.544012	0.256489	0.430738	0.249727
TCGA-HC-A6AS-01A	0.528046	0.313092	0.587501	0.331409	0.320526	0.20436	0.488376	0.245279	0.543567	0.307118	0.317735	0.510538	0.291469	0.394223	0.350611	0.374233	0.49039	0.255374	0.431037	0.119129	0.29059	0.424054	0.296411	0.255023	0.176105	0.566777	0.478263	-0.128641	0.236104	0.257177	0.5304	0.700318	0.506369	0.304253	0.398814	0.704529	0.491712	-0.0193408	0.438219	0.43214	0.495645	0.595147	-0.108396	0.465768	0.434305	0.559231	0.27566	0.480918	0.249183
TCGA-HC-A6HX-01A	0.513138	0.200919	0.547395	0.334839	0.320357	0.23608	0.438587	0.223292	0.513942	0.260436	0.244585	0.517451	0.282187	0.34794	0.347243	0.368888	0.473693	0.243307	0.41939	0.11554	0.275491	0.404308	0.281133	0.152775	0.106015	0.46775	0.372327	-0.0875085	0.17938	0.256409	0.486702	0.69235	0.516272	0.308609	0.412109	0.693861	0.486476	0.0265029	0.430155	0.417479	0.455484	0.568565	-0.105908	0.46163	0.373343	0.526261	0.258145	0.444976	0.274805
TCGA-HC-A6HY-01A	0.501593	0.208033	0.619692	0.214794	0.280407	0.153035	0.411085	0.210582	0.503313	0.233281	0.235753	0.52049	0.318804	0.253297	0.322943	0.327445	0.479428	0.286586	0.394179	0.113106	0.281688	0.34095	0.21545	0.134048	0.0640022	0.453393	0.368409	-0.137102	0.144879	0.287811	0.520936	0.721332	0.527539	0.215506	0.393335	0.694315	0.425448	-0.0119664	0.435247	0.452391	0.532723	0.55478	-0.0881794	0.432174	0.284526	0.554826	0.246659	0.430905	0.258211
TCGA-HC-A76W-01A	0.51613	0.218383	0.637824	0.425123	0.361165	0.213032	0.474718	0.20355	0.490548	0.323636	0.273415	0.478802	0.302875	0.44805	0.342419	0.345509	0.468555	0.287469	0.418424	0.186146	0.299591	0.418497	0.278933	0.186246	0.161232	0.446255	0.376503	-0.152067	0.244572	0.320772	0.519338	0.709025	0.446224	0.287078	0.422176	0.673571	0.464164	-0.00272886	0.424355	0.441268	0.558024	0.553188	-0.119665	0.578586	0.41989	0.565338	0.378795	0.430093	0.297877
TCGA-HC-A76X-01A	0.506064	0.145476	0.657599	0.258266	0.277426	0.111482	0.37031	0.205939	0.510382	0.190771	0.16695	0.499351	0.349907	0.250314	0.299574	0.286866	0.501683	0.322082	0.386437	0.122634	0.283502	0.319194	0.202371	0.0787874	0.0339865	0.340892	0.259658	-0.171027	0.102322	0.34611	0.540574	0.734055	0.530595	0.199343	0.396601	0.698194	0.391538	-0.0267464	0.428226	0.453787	0.572354	0.543609	-0.0916611	0.450102	0.247185	0.57503	0.292755	0.381115	0.265194
TCGA-HC-A8CY-01A	0.474583	0.290559	0.655394	0.252726	0.278211	0.149347	0.414705	0.206994	0.489911	0.164492	0.24486	0.467501	0.319303	0.249443	0.306203	0.28754	0.472005	0.319815	0.362438	0.0871242	0.290572	0.337548	0.260121	0.224436	0.132201	0.588395	0.483289	-0.168252	0.174159	0.329021	0.517739	0.708846	0.458126	0.175785	0.386933	0.665577	0.430069	-0.0919268	0.423585	0.475977	0.565402	0.541864	-0.121229	0.482966	0.348308	0.572413	0.298968	0.414972	0.212965
TCGA-HC-A8D0-01A	0.536051	0.272701	0.616238	0.328965	0.349746	0.191724	0.443537	0.183439	0.475619	0.288978	0.290421	0.502429	0.330842	0.400227	0.337104	0.343006	0.479864	0.297185	0.410062	0.115185	0.300892	0.394546	0.271752	0.212735	0.13174	0.471269	0.412688	-0.15547	0.22437	0.323077	0.530811	0.734719	0.524076	0.274794	0.40698	0.70582	0.452216	-0.0150131	0.416495	0.455699	0.556995	0.565559	-0.096843	0.519981	0.338658	0.565278	0.345542	0.428943	0.302925
TCGA-HC-A8D1-01A	0.530469	0.274461	0.673601	0.334916	0.34147	0.215427	0.489503	0.241695	0.510122	0.245056	0.270908	0.464502	0.280371	0.391506	0.371622	0.356297	0.473069	0.276611	0.412727	0.152025	0.304393	0.419611	0.279926	0.235316	0.1648	0.507901	0.431021	-0.124053	0.208759	0.326051	0.538816	0.700209	0.463453	0.265579	0.43842	0.680602	0.48258	-0.00781723	0.440953	0.454011	0.589873	0.56014	-0.104782	0.534666	0.42951	0.573088	0.364793	0.434965	0.321745
TCGA-HC-A9TE-01A	0.503885	0.335276	0.537717	0.365444	0.354634	0.16704	0.473617	0.215867	0.535083	0.259099	0.277621	0.464771	0.278343	0.390207	0.321594	0.31171	0.46169	0.245502	0.408331	0.108361	0.31347	0.391709	0.324725	0.293885	0.198126	0.544713	0.456057	-0.150275	0.229031	0.314117	0.528574	0.680742	0.41074	0.253961	0.416937	0.664158	0.457225	-0.00533155	0.420239	0.47162	0.562361	0.561909	-0.125336	0.528175	0.385718	0.535347	0.330509	0.439578	0.280477
TCGA-HC-A9TH-01A	0.507415	0.263004	0.641538	0.387841	0.324879	0.159438	0.448148	0.204988	0.555902	0.27406	0.28308	0.480089	0.390266	0.424685	0.328989	0.345302	0.493815	0.375451	0.432646	0.144732	0.306178	0.391219	0.270481	0.216622	0.145559	0.617443	0.507873	-0.173261	0.224892	0.366492	0.587486	0.72222	0.490594	0.209421	0.408296	0.679775	0.431352	-0.102432	0.433715	0.477972	0.579936	0.571073	-0.0889151	0.5139	0.340735	0.573985	0.32752	0.430727	0.24741
TCGA-HI-7168-01A	0.529906	0.152709	0.651928	0.427049	0.348169	0.198973	0.474782	0.194942	0.529536	0.260576	0.227864	0.476705	0.33469	0.498752	0.365283	0.361912	0.466801	0.328935	0.402033	0.201689	0.300655	0.440897	0.277457	0.151894	0.141127	0.407373	0.337748	-0.144042	0.206681	0.33554	0.537512	0.699502	0.478128	0.328934	0.430419	0.677134	0.45648	-0.0644527	0.424692	0.465294	0.557476	0.540262	-0.098363	0.585131	0.421595	0.556897	0.405603	0.430759	0.29658
TCGA-HI-7169-01A	0.542342	0.1665	0.573917	0.280074	0.345433	0.224755	0.422921	0.194015	0.504482	0.247631	0.24077	0.46309	0.230667	0.415714	0.332133	0.329403	0.492372	0.225505	0.402369	0.152306	0.287653	0.438938	0.257486	0.145281	0.0729761	0.405688	0.319483	-0.0693292	0.177845	0.288672	0.49981	0.663631	0.451632	0.594811	0.439066	0.704598	0.447365	-0.00867274	0.408713	0.448298	0.488199	0.568424	-0.101329	0.519219	0.319445	0.513587	0.361705	0.435295	0.280809
TCGA-HI-7170-01A	0.538667	0.289504	0.639727	0.419857	0.376189	0.260882	0.521341	0.20943	0.522883	0.322998	0.320454	0.461309	0.29812	0.49002	0.411869	0.415384	0.483769	0.282272	0.445929	0.161553	0.294035	0.47783	0.324034	0.276909	0.224982	0.515886	0.463243	-0.101025	0.283115	0.316657	0.550296	0.692563	0.477657	0.321176	0.464568	0.678213	0.503342	-0.0109396	0.432026	0.472676	0.558213	0.565984	-0.119841	0.559476	0.496191	0.568868	0.399755	0.46167	0.29045
TCGA-HI-7171-01A	0.504443	0.210473	0.638434	0.335304	0.283059	0.090691	0.394498	0.176166	0.476442	0.17874	0.19738	0.494684	0.346463	0.333634	0.298749	0.287663	0.475159	0.33554	0.385364	0.094163	0.302092	0.33779	0.229022	0.130643	0.0738839	0.386968	0.319006	-0.178303	0.146057	0.345922	0.545155	0.735789	0.53971	0.196494	0.390197	0.686438	0.39734	0.0134946	0.409219	0.478434	0.561288	0.526835	-0.0910154	0.493937	0.289467	0.585708	0.304636	0.406748	0.269019
TCGA-J4-8198-01A	0.510038	0.180016	0.672725	0.330397	0.337379	0.173241	0.419651	0.216101	0.496099	0.226601	0.209836	0.451158	0.299369	0.378434	0.333639	0.309047	0.480037	0.292472	0.389907	0.179455	0.295411	0.367578	0.230578	0.124299	0.0924019	0.394755	0.31579	-0.146624	0.158558	0.344893	0.519415	0.700314	0.436532	0.247565	0.430762	0.67234	0.415243	-0.025559	0.430757	0.45261	0.586471	0.511748	-0.10003	0.518712	0.279365	0.546892	0.393851	0.378299	0.281666
TCGA-J4-8200-01A	0.543016	0.202251	0.691724	0.336972	0.330913	0.159135	0.451677	0.240402	0.540238	0.23515	0.248535	0.451688	0.27126	0.390487	0.36658	0.337555	0.52581	0.267448	0.402389	0.103745	0.314949	0.410059	0.268338	0.148896	0.125868	0.468856	0.39247	-0.132065	0.182659	0.298224	0.55711	0.701095	0.469523	0.48792	0.391873	0.703124	0.449678	-0.0696592	0.446723	0.453728	0.595467	0.552902	-0.102817	0.498542	0.380288	0.568325	0.361076	0.434913	0.221278
TCGA-J4-A67K-01A	0.504915	0.319026	0.580218	0.248126	0.270685	0.16013	0.441821	0.202921	0.481396	0.274031	0.293066	0.535239	0.306457	0.318606	0.312719	0.326806	0.479887	0.265515	0.407153	0.06702	0.277203	0.379078	0.283573	0.240579	0.144952	0.491614	0.434137	-0.146098	0.194529	0.265992	0.516349	0.731391	0.573346	0.222693	0.392199	0.712409	0.471121	-0.0397896	0.419021	0.437864	0.496199	0.579797	-0.101027	0.458411	0.409258	0.559036	0.241391	0.446755	0.259294
TCGA-J4-A67L-01A	0.525685	0.318008	0.603696	0.281558	0.295652	0.170297	0.454606	0.243502	0.518898	0.308089	0.315231	0.511252	0.32074	0.338405	0.328817	0.348057	0.510167	0.277791	0.427195	0.107567	0.285382	0.379402	0.282266	0.241739	0.149727	0.536208	0.463704	-0.167873	0.227431	0.274083	0.542951	0.713259	0.5003	0.251181	0.398281	0.715091	0.452635	-0.0267223	0.435482	0.461202	0.535291	0.603946	-0.0659211	0.428522	0.339366	0.559202	0.256229	0.459199	0.227532
TCGA-J4-A67M-01A	0.518814	0.3022	0.572968	0.329142	0.323472	0.215595	0.444601	0.242547	0.487641	0.318827	0.315274	0.509041	0.262535	0.384104	0.353521	0.370882	0.47774	0.22832	0.411973	0.129032	0.29567	0.394616	0.309698	0.242033	0.153185	0.479921	0.429202	-0.13704	0.240905	0.252915	0.509052	0.696109	0.499185	0.303881	0.405114	0.699613	0.457837	0.0149494	0.424693	0.439645	0.497211	0.584869	-0.12151	0.456539	0.348739	0.545206	0.283003	0.438089	0.249563
TCGA-J4-A67N-01A	0.501368	0.242016	0.559118	0.264712	0.271009	0.138088	0.432869	0.230271	0.517644	0.24322	0.258667	0.524794	0.284479	0.284991	0.320714	0.328826	0.479108	0.235691	0.401389	0.109432	0.280094	0.3708	0.266918	0.188231	0.130388	0.496123	0.398984	-0.137059	0.188215	0.262705	0.509229	0.707038	0.534062	0.223947	0.406681	0.699553	0.454858	-0.00961141	0.439745	0.436395	0.49805	0.563393	-0.0712282	0.448198	0.363791	0.539658	0.219941	0.435859	0.23657
TCGA-J4-A67O-01A	0.55249	0.255586	0.594173	0.332581	0.316116	0.237903	0.440878	0.243421	0.521423	0.279011	0.284032	0.503255	0.254639	0.388995	0.341367	0.347999	0.508258	0.221923	0.413472	0.0838779	0.279901	0.433436	0.291121	0.206125	0.140818	0.51075	0.411499	-0.124234	0.198401	0.246715	0.518861	0.688834	0.498469	0.361494	0.392954	0.71454	0.460292	-0.0268681	0.431561	0.434629	0.477141	0.595091	-0.0994963	0.441886	0.376183	0.527526	0.282191	0.462057	0.233235
TCGA-J4-A67Q-01A	0.517457	0.279773	0.550498	0.305035	0.341254	0.225461	0.458073	0.204811	0.486375	0.310092	0.286599	0.51018	0.256627	0.406205	0.333254	0.349802	0.475244	0.227613	0.411509	0.0803203	0.271259	0.412394	0.310194	0.238388	0.146807	0.453684	0.399754	-0.126421	0.227008	0.258508	0.491128	0.688511	0.501076	0.391135	0.425291	0.695242	0.469042	-0.0796741	0.411243	0.440693	0.463207	0.582898	-0.0984385	0.475519	0.370582	0.51159	0.315226	0.44713	0.260956
TCGA-J4-A67R-01A	0.530881	0.310576	0.591889	0.306422	0.337715	0.244383	0.473894	0.227015	0.506705	0.330109	0.32224	0.507874	0.267685	0.372586	0.36182	0.380577	0.488054	0.23815	0.42401	0.128349	0.283486	0.431629	0.308826	0.284194	0.172613	0.495341	0.437511	-0.10918	0.233198	0.259186	0.515271	0.695996	0.489042	0.314819	0.431534	0.698644	0.476648	0.0123788	0.428458	0.436229	0.489906	0.593959	-0.114402	0.467403	0.427699	0.543388	0.291897	0.461031	0.291412
TCGA-J4-A67S-01A	0.50551	0.274628	0.602846	0.237342	0.290358	0.172829	0.441222	0.221779	0.513238	0.248543	0.268289	0.527432	0.289422	0.28588	0.332422	0.340867	0.478708	0.246906	0.415993	0.104939	0.281216	0.389418	0.275769	0.207247	0.123522	0.487704	0.405731	-0.134889	0.161471	0.269014	0.521364	0.704146	0.526241	0.251094	0.407488	0.690595	0.464133	-0.0214394	0.431073	0.438245	0.507015	0.576969	-0.0926643	0.440073	0.388843	0.564526	0.244599	0.448009	0.26427
TCGA-J4-A67T-01A	0.513036	0.227607	0.689053	0.287013	0.324915	0.171063	0.479066	0.225666	0.540821	0.252346	0.272756	0.473634	0.271618	0.370843	0.365387	0.352441	0.480027	0.272594	0.421329	0.151763	0.30896	0.418206	0.278618	0.235149	0.196337	0.557119	0.44728	-0.146444	0.191022	0.31118	0.552053	0.703233	0.520773	0.257479	0.434485	0.667862	0.469343	-0.0420273	0.431093	0.454921	0.576433	0.588831	-0.11694	0.533411	0.435027	0.593698	0.346765	0.451107	0.283304
TCGA-J4-A6G1-01A	0.517126	0.42417	0.634488	0.319957	0.369163	0.238244	0.497448	0.189854	0.479618	0.318008	0.366929	0.495482	0.384006	0.414023	0.355707	0.371573	0.464707	0.35503	0.403641	0.118711	0.296396	0.410166	0.364305	0.34962	0.22919	0.544506	0.506739	-0.118266	0.302845	0.341613	0.550836	0.723448	0.485724	0.268317	0.445894	0.674342	0.481336	-0.00606479	0.425919	0.482355	0.555505	0.580704	-0.106831	0.518914	0.439224	0.554146	0.346731	0.451399	0.290481
TCGA-J4-A6G3-01A	0.520092	0.333147	0.689055	0.385687	0.363599	0.2141	0.527064	0.221059	0.576611	0.307667	0.347144	0.47146	0.373899	0.412045	0.397129	0.395888	0.484927	0.352925	0.436697	0.144378	0.308168	0.451563	0.332889	0.323273	0.256238	0.541061	0.501932	-0.1364	0.290654	0.351385	0.583677	0.704942	0.482159	0.252136	0.456913	0.663668	0.498404	-0.0636961	0.440003	0.471489	0.576294	0.567081	-0.0879951	0.557917	0.526646	0.588009	0.370326	0.46387	0.311514
TCGA-J4-A6M7-01A	0.51706	0.155866	0.665267	0.303964	0.302869	0.152459	0.393425	0.180447	0.492664	0.217902	0.183734	0.475639	0.315151	0.318822	0.315767	0.291172	0.483403	0.30529	0.383239	0.136499	0.285266	0.340244	0.217383	0.100415	0.0557793	0.353383	0.275135	-0.171438	0.13429	0.350259	0.527335	0.721508	0.493263	0.246795	0.411228	0.679287	0.396142	-0.056971	0.411654	0.465532	0.577143	0.532329	-0.110843	0.493241	0.261238	0.566323	0.345422	0.378865	0.280056
TCGA-J4-A83I-01A	0.486373	0.232334	0.65488	0.290848	0.305625	0.130519	0.44011	0.205519	0.500537	0.235929	0.239134	0.468209	0.27583	0.363897	0.337336	0.307894	0.454551	0.280515	0.387945	0.126668	0.29983	0.376807	0.255281	0.206016	0.147978	0.527279	0.417355	-0.134811	0.183872	0.334962	0.538272	0.700027	0.460909	0.209779	0.419793	0.665095	0.42714	-0.0312751	0.420827	0.455965	0.59417	0.518621	-0.0959144	0.501374	0.365464	0.580785	0.32044	0.409115	0.245127
TCGA-J4-A83J-01A	0.505077	0.256803	0.685627	0.251562	0.310217	0.179	0.469271	0.23704	0.541299	0.265337	0.285812	0.473454	0.339366	0.324137	0.381645	0.368388	0.481213	0.312172	0.424608	0.149172	0.305136	0.406271	0.275409	0.238084	0.184413	0.493601	0.429246	-0.145486	0.20747	0.333831	0.546744	0.694335	0.463469	0.194004	0.480584	0.671672	0.470873	-0.0630787	0.431187	0.457719	0.570052	0.57948	-0.109314	0.500053	0.477047	0.583686	0.316316	0.44575	0.263478
TCGA-J4-A83K-01A	0.531663	0.187427	0.662145	0.29758	0.333041	0.203745	0.430898	0.228155	0.520633	0.239771	0.216569	0.47341	0.277545	0.351554	0.358795	0.343426	0.491515	0.271965	0.401066	0.143398	0.289655	0.377658	0.2368	0.14676	0.0911354	0.426035	0.338466	-0.139202	0.156363	0.324182	0.529443	0.708059	0.493291	0.295991	0.416493	0.687338	0.434994	-0.0467442	0.430689	0.450755	0.563588	0.553112	-0.124953	0.502375	0.326425	0.569308	0.345648	0.417736	0.296769
TCGA-J4-A83L-01A	0.535558	0.173584	0.684684	0.313292	0.324453	0.17451	0.482589	0.227764	0.54698	0.24508	0.235718	0.458649	0.261032	0.392996	0.375292	0.340932	0.500856	0.263281	0.422363	0.12772	0.302889	0.428422	0.256007	0.193178	0.152807	0.437031	0.353673	-0.152371	0.180294	0.31654	0.53918	0.693964	0.466405	0.289703	0.429997	0.678686	0.458881	-0.0943445	0.4389	0.449959	0.581084	0.561704	-0.121099	0.516641	0.435437	0.577824	0.378116	0.430222	0.271698
TCGA-J4-A83M-01A	0.511442	0.245894	0.646287	0.285459	0.308275	0.155779	0.466398	0.222453	0.504402	0.239475	0.242989	0.477543	0.276785	0.328036	0.358282	0.337802	0.480557	0.264857	0.405367	0.132769	0.294705	0.39338	0.259641	0.212602	0.142885	0.517092	0.425506	-0.136889	0.175919	0.317384	0.510764	0.696223	0.512479	0.238162	0.401422	0.658738	0.468069	-0.0687798	0.435997	0.454582	0.547208	0.561613	-0.144505	0.514644	0.41314	0.57719	0.318902	0.436889	0.279565
TCGA-J4-A83N-01A	0.518121	0.207726	0.66283	0.279207	0.288334	0.147036	0.453886	0.229391	0.504765	0.213903	0.225485	0.492406	0.310507	0.2941	0.355579	0.338768	0.491477	0.291303	0.418692	0.141537	0.288068	0.384069	0.250998	0.190697	0.114044	0.446363	0.359576	-0.13686	0.154692	0.307614	0.544144	0.714828	0.520842	0.216343	0.412933	0.702396	0.461544	-0.0488832	0.441621	0.464017	0.569278	0.551689	-0.111166	0.465186	0.399733	0.594457	0.286545	0.425309	0.283802
TCGA-J4-AATV-01A	0.528759	0.285897	0.631413	0.329031	0.365093	0.242132	0.516554	0.215368	0.523171	0.312727	0.316379	0.465156	0.257333	0.425407	0.409894	0.392032	0.475967	0.261699	0.422438	0.14872	0.307833	0.457482	0.315389	0.31969	0.238427	0.491675	0.454012	-0.121885	0.258198	0.312102	0.527515	0.681887	0.457088	0.317708	0.45967	0.669436	0.499853	-0.0654314	0.429089	0.456968	0.538826	0.579169	-0.134227	0.533944	0.533537	0.558815	0.36623	0.462484	0.348802
TCGA-J4-AATZ-01A	0.510212	0.171484	0.682457	0.272576	0.301719	0.158754	0.430477	0.2119	0.547005	0.191483	0.203038	0.465534	0.318148	0.275956	0.352728	0.327712	0.477996	0.314225	0.424589	0.157768	0.304015	0.384789	0.232607	0.139317	0.101276	0.47915	0.373668	-0.139004	0.138489	0.344837	0.55327	0.696761	0.465571	0.186289	0.428748	0.673831	0.449859	-0.0152701	0.433106	0.464645	0.59167	0.538309	-0.111889	0.505913	0.359663	0.575581	0.330207	0.410835	0.278554
TCGA-J4-AAU2-01A	0.525357	0.199781	0.695883	0.266878	0.29778	0.155661	0.434451	0.225018	0.528764	0.212131	0.214025	0.483806	0.295446	0.303325	0.338515	0.314492	0.50161	0.279279	0.406445	0.117909	0.308542	0.377402	0.240828	0.179619	0.112126	0.442028	0.366723	-0.156963	0.158334	0.318765	0.541649	0.691227	0.479152	0.241006	0.444285	0.684626	0.437247	-0.108632	0.428282	0.467261	0.567066	0.562345	-0.116605	0.486258	0.370461	0.573294	0.324668	0.423034	0.247881
TCGA-J9-A52B-01A	0.500795	0.232653	0.62832	0.342154	0.330608	0.132865	0.415948	0.176484	0.500534	0.220491	0.24412	0.502357	0.348507	0.363208	0.326519	0.324489	0.463771	0.320217	0.403945	0.241225	0.287016	0.370992	0.236375	0.172388	0.109187	0.520253	0.407611	-0.138572	0.185921	0.341071	0.52538	0.715993	0.474967	0.24803	0.411149	0.68993	0.416819	0.0748446	0.430754	0.45141	0.540837	0.554462	-0.069671	0.480252	0.317609	0.531675	0.317048	0.434434	0.28667
TCGA-J9-A52C-01A	0.533639	0.302685	0.6285	0.460175	0.386862	0.234043	0.518397	0.209734	0.513186	0.327041	0.324602	0.483092	0.266439	0.507786	0.37831	0.377497	0.463038	0.248911	0.422931	0.153398	0.294963	0.468451	0.325595	0.259631	0.241142	0.522834	0.477416	-0.112164	0.284262	0.298663	0.518912	0.695539	0.465354	0.327223	0.474945	0.677617	0.50484	0.0297515	0.420385	0.4532	0.536697	0.570642	-0.132144	0.563045	0.530446	0.546732	0.381233	0.465642	0.339647
TCGA-J9-A52D-01A	0.472136	0.124939	0.671564	0.107981	0.248737	0.0782046	0.346938	0.241463	0.534	0.137283	0.17444	0.509103	0.402933	0.178682	0.300965	0.292353	0.5015	0.362744	0.373182	0.090024	0.294631	0.271477	0.187969	0.06327	0.0273163	0.394796	0.289118	-0.214774	0.0769901	0.330275	0.551678	0.721689	0.511876	0.138425	0.354949	0.686954	0.38963	-0.105379	0.446928	0.475886	0.578519	0.525972	-0.0698363	0.384723	0.19824	0.550954	0.278245	0.376928	0.224023
TCGA-J9-A52E-01A	0.486313	0.255812	0.57665	0.38824	0.360903	0.154476	0.454511	0.197262	0.480815	0.279028	0.274546	0.523552	0.430667	0.502613	0.317458	0.331488	0.452836	0.380883	0.416394	0.20381	0.286919	0.376102	0.298064	0.170282	0.126193	0.456744	0.39337	-0.165756	0.234415	0.324019	0.548278	0.739171	0.523547	0.254922	0.432857	0.674047	0.44534	0.106446	0.424931	0.464059	0.511363	0.524099	-0.0509555	0.550011	0.330041	0.549011	0.334729	0.444228	0.388403
TCGA-J9-A8CK-01A	0.529114	0.218835	0.64952	0.40708	0.346141	0.172852	0.461554	0.217771	0.538036	0.290113	0.259868	0.487477	0.323729	0.471336	0.352096	0.356857	0.475267	0.31148	0.428743	0.174277	0.280451	0.42849	0.276472	0.166934	0.140608	0.467628	0.382495	-0.137634	0.216984	0.327312	0.534078	0.716486	0.497539	0.303627	0.422171	0.697249	0.459436	0.0182388	0.438566	0.449506	0.535182	0.562131	-0.0957754	0.555719	0.395793	0.565499	0.359802	0.441958	0.310637
TCGA-J9-A8CL-01A	0.501101	0.274477	0.659245	0.400105	0.337788	0.159572	0.431341	0.234643	0.502243	0.260328	0.249288	0.48685	0.38441	0.468366	0.298068	0.307351	0.478086	0.353277	0.405531	0.170963	0.305353	0.366163	0.270106	0.235363	0.143704	0.497087	0.417903	-0.17802	0.216149	0.34959	0.539582	0.703443	0.440116	0.249196	0.400606	0.67467	0.442734	-0.071521	0.42168	0.469445	0.561634	0.539781	-0.0717683	0.529961	0.317256	0.546872	0.3545	0.404502	0.259496
TCGA-J9-A8CM-01A	0.528812	0.228241	0.616129	0.353016	0.347266	0.184638	0.447615	0.199146	0.475048	0.26589	0.242294	0.494275	0.350685	0.443559	0.346354	0.343001	0.464374	0.331979	0.412973	0.111837	0.294119	0.391262	0.251787	0.157435	0.112652	0.446592	0.37216	-0.162865	0.197602	0.34611	0.514895	0.72383	0.504517	0.291532	0.426803	0.68861	0.439528	-0.0211767	0.42776	0.453846	0.546602	0.560643	-0.0993599	0.511997	0.318024	0.545847	0.362088	0.419799	0.304268
TCGA-J9-A8CN-01A	0.523933	0.16985	0.691155	0.308226	0.283142	0.0949774	0.447955	0.227564	0.535845	0.2099	0.227386	0.481979	0.30664	0.323087	0.340946	0.322094	0.510915	0.284331	0.408451	0.105429	0.296903	0.400581	0.246977	0.161017	0.148069	0.398822	0.342203	-0.163375	0.158072	0.306675	0.560465	0.702572	0.498055	0.298926	0.348666	0.700673	0.460816	-0.0892604	0.429039	0.464588	0.555397	0.572741	-0.122199	0.467502	0.427567	0.587182	0.322786	0.43219	0.244165
TCGA-J9-A8CP-01A	0.51846	0.182664	0.656345	0.353348	0.329807	0.154701	0.447098	0.226774	0.526138	0.246934	0.229972	0.485515	0.288807	0.399904	0.34616	0.329797	0.484542	0.276582	0.393594	0.199472	0.301103	0.381384	0.26996	0.184659	0.140313	0.451763	0.370501	-0.181052	0.189062	0.32041	0.52696	0.69427	0.438399	0.238444	0.409209	0.690077	0.443612	-0.041139	0.436488	0.46335	0.562176	0.544669	-0.119973	0.514759	0.371641	0.571847	0.358392	0.432631	0.287489
TCGA-KC-A4BL-01A	0.519381	0.25687	0.64721	0.364792	0.375099	0.235114	0.501176	0.20361	0.521958	0.286006	0.293609	0.476918	0.299556	0.411876	0.398738	0.391341	0.469287	0.287637	0.419724	0.155504	0.302293	0.434393	0.29659	0.225842	0.189053	0.516046	0.447216	-0.110248	0.238866	0.331194	0.530039	0.705243	0.498282	0.286443	0.456074	0.665013	0.509472	-0.0431114	0.442927	0.459349	0.561614	0.549978	-0.139226	0.556918	0.475882	0.580369	0.373535	0.455009	0.351249
TCGA-KC-A4BN-01A	0.5089	0.206425	0.714521	0.218115	0.303896	0.15498	0.459388	0.222404	0.56183	0.214459	0.243599	0.466551	0.296283	0.304156	0.378042	0.36416	0.487204	0.297494	0.404866	0.159904	0.313896	0.399748	0.24962	0.17488	0.150008	0.486972	0.396525	-0.127485	0.161224	0.3239	0.559115	0.704609	0.528303	0.221887	0.410267	0.658525	0.454248	-0.0782336	0.445155	0.465404	0.584599	0.570336	-0.105101	0.518504	0.421601	0.601479	0.326284	0.453172	0.265942
TCGA-KC-A4BR-01A	0.531027	0.203285	0.660243	0.387181	0.381397	0.21877	0.501485	0.205788	0.54666	0.264354	0.267213	0.455885	0.268468	0.475109	0.384126	0.361927	0.475652	0.272736	0.412426	0.167457	0.309489	0.479118	0.306461	0.221953	0.213029	0.45845	0.388447	-0.120829	0.210704	0.331892	0.54032	0.694638	0.485609	0.439332	0.48256	0.672055	0.490698	-0.051234	0.410161	0.453035	0.534517	0.574877	-0.122714	0.567774	0.517948	0.577253	0.405991	0.460636	0.320129
TCGA-KC-A4BV-01A	0.493605	0.263243	0.623301	0.353547	0.332729	0.170139	0.451664	0.203695	0.491269	0.22998	0.245148	0.458414	0.317788	0.412692	0.310793	0.288056	0.453239	0.315144	0.380803	0.173925	0.28605	0.355491	0.263095	0.194033	0.140923	0.540709	0.441808	-0.15888	0.186871	0.352822	0.519806	0.704367	0.434749	0.254799	0.462962	0.664023	0.432182	-0.0874891	0.422321	0.475885	0.571418	0.536609	-0.111038	0.539436	0.338777	0.537788	0.367518	0.428915	0.303206
TCGA-KC-A7F3-01A	0.531773	0.191067	0.669353	0.287865	0.311334	0.17374	0.464492	0.22612	0.532839	0.280729	0.260112	0.486469	0.3196	0.371884	0.402195	0.394692	0.497416	0.295304	0.429048	0.107198	0.306859	0.408362	0.263704	0.204616	0.158484	0.438325	0.379063	-0.138289	0.186961	0.306027	0.547979	0.713316	0.533162	0.243041	0.423771	0.699361	0.480355	-0.0461901	0.448523	0.447452	0.554385	0.568782	-0.12702	0.504201	0.439165	0.591796	0.333916	0.433373	0.256684
TCGA-KC-A7F5-01A	0.492672	0.0946175	0.636938	0.206891	0.248844	0.127506	0.352108	0.212696	0.567795	0.146875	0.156136	0.515417	0.393613	0.226054	0.309344	0.303013	0.47668	0.363177	0.394718	0.0710015	0.292583	0.320184	0.197014	0.0820224	0.0308277	0.410243	0.296111	-0.139204	0.0562494	0.316258	0.553022	0.72183	0.5497	0.165152	0.354961	0.694051	0.409118	-0.141621	0.431488	0.458822	0.521023	0.538173	-0.093531	0.411124	0.254157	0.575845	0.249893	0.380818	0.222251
TCGA-KC-A7F6-01A	0.513389	0.222056	0.642681	0.318995	0.314059	0.148354	0.434914	0.206973	0.508261	0.260229	0.252021	0.49178	0.31927	0.347525	0.354528	0.351428	0.480653	0.308423	0.399431	0.100448	0.290745	0.375911	0.260597	0.164879	0.118949	0.462377	0.38006	-0.12929	0.182099	0.325558	0.53533	0.729408	0.54883	0.256848	0.426814	0.696538	0.443452	-0.0479717	0.442858	0.457865	0.533283	0.549525	-0.126639	0.510001	0.367805	0.574221	0.332709	0.432662	0.310935
TCGA-KC-A7FA-01A	0.525702	0.222234	0.647189	0.288807	0.300174	0.151893	0.451126	0.186896	0.512778	0.229483	0.245975	0.487441	0.2915	0.328105	0.327744	0.313367	0.493364	0.277145	0.412679	0.120882	0.302586	0.393985	0.25728	0.198799	0.136562	0.483493	0.407928	-0.177046	0.188735	0.292866	0.536064	0.707666	0.513182	0.250362	0.410262	0.68856	0.427295	-0.0249087	0.400597	0.460602	0.551325	0.560597	-0.104474	0.468883	0.374212	0.580856	0.307182	0.440188	0.267576
TCGA-KC-A7FD-01A	0.486796	0.169156	0.654988	0.234042	0.285239	0.0997358	0.426766	0.188178	0.505019	0.17209	0.215456	0.494402	0.335024	0.272692	0.322773	0.313076	0.463435	0.334599	0.386291	0.0994048	0.28859	0.343278	0.243201	0.18734	0.125992	0.473413	0.369552	-0.170044	0.141645	0.328929	0.546196	0.728734	0.557109	0.191295	0.369417	0.675974	0.429584	-0.0663045	0.422669	0.473384	0.569425	0.56562	-0.1007	0.494351	0.351023	0.603193	0.287224	0.404334	0.265124
TCGA-KC-A7FE-01A	0.540361	0.201345	0.649148	0.37116	0.380296	0.232039	0.460954	0.210695	0.496222	0.258333	0.241515	0.471914	0.278295	0.427328	0.357846	0.35357	0.497303	0.258129	0.405341	0.148165	0.30205	0.417999	0.254507	0.17657	0.115303	0.448732	0.377265	-0.105075	0.202488	0.32014	0.517722	0.691849	0.449481	0.440137	0.452676	0.688691	0.473628	-0.0668271	0.438244	0.453663	0.560279	0.555193	-0.130768	0.516529	0.352433	0.553311	0.392759	0.427799	0.300866
TCGA-KK-A59V-01A	0.459581	0.465691	0.586984	0.260398	0.285943	0.194307	0.501248	0.162015	0.465709	0.284365	0.336369	0.541172	0.465642	0.329512	0.310447	0.33324	0.456473	0.411545	0.377007	0.0713667	0.289321	0.370871	0.360185	0.367462	0.238501	0.591439	0.535656	-0.17989	0.236938	0.325459	0.550716	0.739294	0.5037	0.175137	0.344918	0.674661	0.483492	-0.0865475	0.423646	0.49486	0.510074	0.55863	-0.0970049	0.484803	0.443137	0.545999	0.282707	0.467541	0.236182
TCGA-KK-A59X-01A	0.527873	0.187961	0.687315	0.351343	0.28859	0.132218	0.43234	0.24407	0.569221	0.243828	0.228157	0.495498	0.405297	0.37595	0.340971	0.33909	0.520503	0.362549	0.434266	0.104117	0.299392	0.400608	0.233797	0.136035	0.117242	0.496971	0.393122	-0.168646	0.16301	0.320935	0.585683	0.714976	0.466469	0.227172	0.388842	0.712845	0.449536	-0.0878161	0.468755	0.47546	0.559967	0.580306	-0.0722483	0.458742	0.340101	0.562098	0.306345	0.425167	0.1892
TCGA-KK-A59Y-01A	0.501166	0.190504	0.640005	0.278178	0.274494	0.125381	0.408811	0.213236	0.529956	0.199797	0.194482	0.484591	0.308168	0.275422	0.31203	0.310719	0.485582	0.298206	0.39575	0.112707	0.296511	0.351251	0.239341	0.15165	0.0741811	0.429055	0.343172	-0.159376	0.149746	0.315263	0.552682	0.7105	0.502409	0.203806	0.378776	0.70188	0.420434	-0.00859436	0.441803	0.462709	0.55074	0.548972	-0.0888327	0.462482	0.29571	0.565064	0.272996	0.406766	0.272111
TCGA-KK-A59Z-01A	0.528478	0.242946	0.67738	0.406321	0.357606	0.182104	0.46277	0.244259	0.539251	0.28673	0.275325	0.46534	0.294542	0.427862	0.368625	0.357054	0.47708	0.292426	0.405586	0.127713	0.308932	0.409193	0.280954	0.207346	0.193474	0.434275	0.391098	-0.139627	0.220256	0.305888	0.548475	0.69977	0.482687	0.297604	0.460365	0.669526	0.458802	-0.0546876	0.431277	0.453726	0.544218	0.555718	-0.126411	0.544206	0.441325	0.557474	0.387835	0.439144	0.271563
TCGA-KK-A5A1-01A	0.496944	0.234736	0.684921	0.296308	0.28469	0.119492	0.41475	0.237102	0.50134	0.20947	0.214347	0.49752	0.437994	0.364127	0.298566	0.29468	0.479542	0.401632	0.391264	0.107978	0.300725	0.338932	0.224444	0.154368	0.0990914	0.403044	0.356647	-0.208298	0.178212	0.334172	0.563915	0.748721	0.509515	0.191877	0.364796	0.690164	0.415095	0.0387314	0.443591	0.46995	0.583858	0.527711	-0.0720047	0.50743	0.299756	0.562558	0.335737	0.404601	0.208645
TCGA-KK-A6DY-01A	0.50401	0.274085	0.653907	0.30579	0.315685	0.176873	0.495807	0.21275	0.535804	0.30064	0.296483	0.479524	0.288342	0.356328	0.365159	0.360032	0.470466	0.281902	0.406719	0.115711	0.296954	0.415512	0.280048	0.247967	0.20397	0.498002	0.443989	-0.124287	0.230597	0.321413	0.537867	0.711865	0.484875	0.218734	0.424233	0.66468	0.468155	-0.0732679	0.443743	0.465481	0.577902	0.541205	-0.12193	0.539465	0.485974	0.574199	0.337875	0.438585	0.282675
TCGA-KK-A6E0-01A	0.530614	0.174525	0.693885	0.286842	0.274714	0.133716	0.376113	0.256132	0.529681	0.183776	0.207236	0.492971	0.356665	0.261796	0.330153	0.332871	0.508526	0.324234	0.39098	0.130805	0.310294	0.328434	0.223518	0.133677	0.0756861	0.439447	0.35761	-0.164496	0.12488	0.329901	0.578803	0.712404	0.528615	0.187412	0.381307	0.704578	0.417243	-0.0969286	0.455319	0.460336	0.579286	0.570084	-0.0820024	0.424718	0.262409	0.586747	0.273533	0.427495	0.219485
TCGA-KK-A6E1-01A	0.506091	0.203226	0.651629	0.294724	0.271535	0.0873903	0.412677	0.215188	0.564408	0.203184	0.232639	0.48623	0.387941	0.277968	0.329856	0.333261	0.466342	0.359315	0.41962	0.109519	0.293667	0.36292	0.229674	0.132134	0.0951993	0.547861	0.424173	-0.145292	0.150437	0.345532	0.578748	0.721385	0.54167	0.16391	0.383438	0.699035	0.421985	-0.0353148	0.432314	0.470506	0.580139	0.552852	-0.0786912	0.464889	0.348703	0.592923	0.260559	0.433461	0.227358
TCGA-KK-A6E2-01A	0.48294	0.212441	0.638713	0.284218	0.275099	0.131493	0.383188	0.19914	0.45406	0.17759	0.174057	0.487064	0.343399	0.260187	0.304553	0.264797	0.457624	0.323796	0.381076	0.134433	0.286228	0.328793	0.237741	0.166223	0.0831766	0.369353	0.302274	-0.162803	0.123096	0.359061	0.527361	0.728558	0.515567	0.155919	0.399226	0.666606	0.392113	-0.0203061	0.426482	0.465847	0.580104	0.514956	-0.0985244	0.479128	0.272308	0.579621	0.302888	0.383323	0.27813
TCGA-KK-A6E3-01A	0.531636	0.305441	0.61707	0.287328	0.31807	0.22246	0.457246	0.240702	0.542527	0.275968	0.293804	0.499726	0.269648	0.352581	0.324593	0.351697	0.510366	0.236334	0.418495	0.0837166	0.292731	0.404379	0.287334	0.25175	0.142508	0.502757	0.43989	-0.123172	0.210307	0.250808	0.528358	0.69361	0.45055	0.317661	0.393045	0.710398	0.467274	-0.0777884	0.443862	0.447998	0.521195	0.588422	-0.0922902	0.438925	0.362452	0.545542	0.293497	0.457384	0.250874
TCGA-KK-A6E4-01A	0.493869	0.240085	0.599436	0.217379	0.257461	0.134625	0.406522	0.21371	0.49307	0.22211	0.221771	0.536151	0.326082	0.248921	0.308691	0.312667	0.471942	0.291052	0.396116	0.0711857	0.270169	0.354238	0.254411	0.181578	0.0818511	0.453676	0.363305	-0.151275	0.128953	0.277504	0.526165	0.725268	0.538052	0.226286	0.356235	0.701937	0.426273	-0.0519699	0.425112	0.450913	0.524078	0.544464	-0.0933862	0.419493	0.314125	0.5628	0.234203	0.423642	0.238505
TCGA-KK-A6E5-01A	0.521686	0.231822	0.659921	0.29062	0.322277	0.185195	0.437433	0.242746	0.520061	0.235881	0.236683	0.493753	0.292908	0.318676	0.357366	0.337224	0.492028	0.281638	0.405797	0.102374	0.305089	0.364041	0.239111	0.178267	0.115635	0.459401	0.389626	-0.156246	0.165986	0.304676	0.541883	0.709606	0.50179	0.231273	0.408526	0.683527	0.443549	-0.035517	0.437085	0.458833	0.567923	0.549901	-0.105609	0.469855	0.300316	0.581674	0.31793	0.413503	0.275045
TCGA-KK-A6E6-01A	0.518647	0.267842	0.654435	0.374305	0.322826	0.174389	0.478644	0.21511	0.515204	0.287861	0.277686	0.481772	0.306742	0.41504	0.340194	0.342459	0.500159	0.285794	0.41969	0.165078	0.282671	0.40905	0.279857	0.224022	0.16731	0.488776	0.41946	-0.14756	0.219658	0.310644	0.545808	0.71158	0.47155	0.244622	0.442518	0.687418	0.464495	-0.0163873	0.435621	0.463712	0.576493	0.558614	-0.0858422	0.534149	0.429205	0.567984	0.34952	0.435621	0.28918
TCGA-KK-A6E7-01A	0.501674	0.162309	0.653448	0.294767	0.273876	0.153776	0.395903	0.206844	0.49455	0.211486	0.199292	0.522509	0.405117	0.302114	0.302242	0.314281	0.477324	0.358118	0.43028	0.12993	0.299664	0.377034	0.229929	0.100624	0.0614932	0.401892	0.319034	-0.174704	0.129578	0.344705	0.555558	0.725545	0.45901	0.22814	0.37737	0.708175	0.419867	-0.0975152	0.422297	0.479208	0.557185	0.54323	-0.0564638	0.44622	0.280537	0.549907	0.289943	0.423291	0.2381
TCGA-KK-A6E8-01A	0.532697	0.122053	0.668649	0.237212	0.253645	0.0806633	0.348409	0.225726	0.536517	0.134199	0.171322	0.507722	0.330458	0.242816	0.307411	0.310737	0.503615	0.294992	0.377174	0.0562735	0.285355	0.304695	0.20256	0.0668295	0.0390164	0.326903	0.280811	-0.153376	0.0744662	0.281406	0.558392	0.721152	0.547795	0.274888	0.380769	0.723982	0.379526	-0.11118	0.429121	0.463674	0.548314	0.54088	-0.0998491	0.409061	0.244255	0.56639	0.283789	0.391645	0.212069
TCGA-KK-A7AP-01A	0.477294	0.129076	0.60111	0.212882	0.261419	0.0625354	0.34042	0.18654	0.456292	0.153289	0.164889	0.508689	0.326914	0.245619	0.289231	0.262982	0.450543	0.31056	0.341139	0.100729	0.290711	0.299944	0.1977	0.085845	0.0512432	0.430236	0.312426	-0.158167	0.0941701	0.31476	0.506536	0.72883	0.522194	0.195601	0.349737	0.677746	0.391338	-0.0760333	0.414028	0.438652	0.534961	0.534922	-0.0809145	0.432212	0.224325	0.556454	0.277608	0.375932	0.24751
TCGA-KK-A7AQ-01A	0.513884	0.187441	0.627415	0.322595	0.310364	0.155066	0.401235	0.243086	0.507157	0.2631	0.226843	0.497622	0.333497	0.350557	0.331448	0.343527	0.485052	0.290621	0.414292	0.12343	0.290542	0.357514	0.243478	0.157462	0.0832908	0.471008	0.375989	-0.151466	0.143724	0.28823	0.52656	0.683737	0.511902	0.257038	0.423455	0.677194	0.442383	-0.0709999	0.438259	0.441921	0.496494	0.563189	-0.116251	0.442277	0.28347	0.544967	0.267701	0.431683	0.268101
TCGA-KK-A7AU-01A	0.469449	0.148745	0.617918	0.207229	0.261951	0.0835078	0.325118	0.210221	0.493224	0.152384	0.160823	0.50529	0.347826	0.143429	0.26523	0.244223	0.467175	0.324161	0.359974	0.134263	0.275752	0.282212	0.19726	0.0804656	0.0386732	0.445888	0.317617	-0.173861	0.0762641	0.333303	0.529065	0.720833	0.518091	0.120321	0.380493	0.692974	0.371461	-0.0400663	0.442705	0.449732	0.544618	0.508728	-0.08108	0.433424	0.192456	0.566764	0.24082	0.397404	0.249435
TCGA-KK-A7AV-01A	0.518102	0.355927	0.662229	0.327955	0.342437	0.202334	0.476283	0.232526	0.510804	0.295273	0.318008	0.489193	0.286813	0.360883	0.373259	0.367666	0.487876	0.269112	0.413366	0.122252	0.308139	0.393346	0.307604	0.312648	0.19318	0.565781	0.502551	-0.139319	0.2487	0.304541	0.534635	0.698264	0.483479	0.242041	0.428673	0.677458	0.475263	-0.0474287	0.447211	0.470368	0.545821	0.567639	-0.133636	0.492926	0.417115	0.571802	0.324983	0.449308	0.281702
TCGA-KK-A7AW-01A	0.496302	0.327612	0.5481	0.244457	0.266221	0.147855	0.394248	0.227429	0.497982	0.286465	0.286571	0.531205	0.30123	0.266246	0.302565	0.329586	0.458573	0.267337	0.393659	0.0541661	0.273619	0.339308	0.290152	0.225405	0.126913	0.5398	0.462832	-0.135219	0.185837	0.249264	0.509806	0.701471	0.572312	0.23941	0.318529	0.703546	0.428545	-0.10483	0.431568	0.441568	0.45591	0.575959	-0.101454	0.374516	0.276817	0.540122	0.200003	0.441549	0.197061
TCGA-KK-A7AY-01A	0.506051	0.20016	0.596409	0.232725	0.270057	0.148261	0.429082	0.227201	0.544249	0.215242	0.223884	0.516067	0.29981	0.289655	0.327058	0.326758	0.490033	0.272417	0.420525	0.0747358	0.290431	0.380989	0.244041	0.150873	0.0934069	0.460767	0.374158	-0.146651	0.139439	0.261226	0.53543	0.723414	0.525308	0.225752	0.39894	0.72125	0.44593	-0.033184	0.44587	0.447239	0.517129	0.575028	-0.0902858	0.443241	0.325777	0.554811	0.252305	0.435745	0.235136
TCGA-KK-A7AZ-01A	0.492498	0.163955	0.596508	0.272771	0.263331	0.101093	0.386584	0.21694	0.462059	0.205478	0.192865	0.511167	0.327454	0.286637	0.304461	0.309577	0.48538	0.315866	0.40422	0.0977828	0.273589	0.333965	0.223965	0.110311	0.073771	0.416386	0.322996	-0.1685	0.138401	0.303928	0.520935	0.738433	0.575016	0.204011	0.357542	0.70106	0.422492	-0.0372727	0.432744	0.454529	0.514241	0.547918	-0.0964278	0.456981	0.259576	0.574021	0.255223	0.401218	0.248792
TCGA-KK-A7B0-01A	0.521193	0.329179	0.572989	0.283531	0.324964	0.218567	0.440934	0.232169	0.495861	0.295012	0.304973	0.518854	0.293425	0.35444	0.349585	0.367232	0.480206	0.245777	0.413272	0.0650131	0.298252	0.375915	0.295511	0.248829	0.153414	0.497817	0.429269	-0.137506	0.208628	0.253102	0.510807	0.689557	0.520057	0.292891	0.380098	0.703237	0.481929	-0.0388583	0.432157	0.441049	0.463509	0.597433	-0.114973	0.423542	0.337156	0.529699	0.275029	0.452877	0.241503
TCGA-KK-A7B1-01A	0.525503	0.21828	0.654017	0.391894	0.335736	0.158542	0.442149	0.207191	0.499646	0.312624	0.279133	0.498622	0.309386	0.427538	0.333631	0.340094	0.507818	0.287819	0.413247	0.152709	0.289557	0.391428	0.261915	0.170878	0.131638	0.453584	0.390177	-0.157706	0.223074	0.327998	0.537278	0.717301	0.521987	0.268838	0.426953	0.689138	0.437595	-0.00732422	0.439663	0.450931	0.551837	0.569539	-0.116954	0.52647	0.384866	0.581607	0.345699	0.431349	0.349072
TCGA-KK-A7B2-01A	0.524595	0.340053	0.618409	0.373534	0.350929	0.242481	0.48418	0.225562	0.504609	0.310012	0.318969	0.508061	0.288554	0.412813	0.360937	0.377225	0.483552	0.254574	0.42628	0.148067	0.286926	0.438205	0.331369	0.296486	0.210506	0.549327	0.472158	-0.104062	0.250598	0.280626	0.531352	0.70665	0.499525	0.291234	0.434405	0.694222	0.503606	0.00146901	0.444885	0.450326	0.514656	0.589813	-0.110553	0.512146	0.453007	0.558532	0.308816	0.470514	0.294112
TCGA-KK-A7B3-01A	0.501347	0.26266	0.596768	0.353669	0.325024	0.175395	0.431543	0.201999	0.50007	0.266888	0.255321	0.484669	0.276437	0.386044	0.326657	0.332678	0.469207	0.261302	0.401691	0.136529	0.294013	0.37455	0.283962	0.215758	0.144677	0.47549	0.389866	-0.136531	0.216966	0.298011	0.520005	0.694948	0.464685	0.262425	0.402995	0.671073	0.434669	-0.00867468	0.421224	0.443463	0.53832	0.556284	-0.142159	0.5031	0.324485	0.564136	0.306234	0.42267	0.266905
TCGA-KK-A7B4-01A	0.510007	0.261494	0.628303	0.286156	0.296763	0.139591	0.405653	0.188715	0.522148	0.198242	0.221918	0.494624	0.405111	0.334713	0.298349	0.30613	0.474254	0.379077	0.393158	0.0800462	0.283352	0.334292	0.254726	0.180772	0.104563	0.47854	0.392049	-0.155285	0.152823	0.364955	0.559573	0.740702	0.536877	0.200928	0.402499	0.684358	0.413734	-0.0582155	0.432519	0.467263	0.533483	0.558807	-0.0909537	0.495964	0.284383	0.578585	0.279484	0.413188	0.271267
TCGA-KK-A8I4-01A	0.512955	0.36446	0.637989	0.407562	0.368486	0.191059	0.493352	0.199118	0.490654	0.327195	0.335793	0.4738	0.299783	0.45924	0.371627	0.373674	0.457741	0.279126	0.40127	0.130345	0.286567	0.409545	0.338834	0.334402	0.236684	0.551109	0.494416	-0.137706	0.29097	0.316459	0.54312	0.702753	0.462734	0.291325	0.478752	0.664625	0.475695	-0.0140917	0.422638	0.468906	0.547847	0.577668	-0.12948	0.533816	0.453921	0.575021	0.378549	0.462806	0.310481
TCGA-KK-A8I5-01A	0.516857	0.219797	0.663311	0.366909	0.312046	0.125882	0.472462	0.223911	0.511567	0.260652	0.250539	0.471453	0.2722	0.39643	0.372063	0.351716	0.494049	0.27245	0.425635	0.156062	0.298744	0.412357	0.270927	0.165739	0.147677	0.485476	0.400389	-0.185732	0.186919	0.309491	0.552201	0.709067	0.499047	0.25216	0.428123	0.68903	0.45647	0.0233676	0.442923	0.470926	0.565807	0.573058	-0.129877	0.517516	0.406288	0.583136	0.336103	0.449992	0.266974
TCGA-KK-A8I6-01A	0.515303	0.195416	0.667476	0.275788	0.304205	0.146623	0.404702	0.22718	0.535515	0.247528	0.227381	0.494726	0.316171	0.299859	0.329946	0.332109	0.491982	0.299272	0.405703	0.131272	0.294947	0.356104	0.222865	0.131076	0.0809968	0.429734	0.344939	-0.138063	0.164551	0.326727	0.542732	0.715793	0.487444	0.210051	0.414721	0.685637	0.429238	0.0151104	0.435068	0.462233	0.57408	0.568255	-0.0944567	0.475794	0.28891	0.564892	0.297794	0.405405	0.278554
TCGA-KK-A8I7-01A	0.536767	0.253878	0.652494	0.366485	0.362768	0.209642	0.456643	0.22471	0.492385	0.25978	0.2874	0.471642	0.308581	0.373884	0.357748	0.341996	0.492357	0.291654	0.398343	0.145496	0.309347	0.393654	0.268623	0.204969	0.160547	0.505535	0.434454	-0.144912	0.21726	0.338115	0.526507	0.698691	0.46112	0.278041	0.449344	0.68473	0.470398	-0.0699476	0.428916	0.465224	0.563674	0.565201	-0.124578	0.514448	0.356244	0.563493	0.361834	0.435317	0.347644
TCGA-KK-A8I8-01A	0.505288	0.206833	0.622018	0.261069	0.287771	0.13197	0.373337	0.181404	0.450351	0.182747	0.205298	0.524126	0.35201	0.28446	0.300671	0.294014	0.458121	0.324762	0.362361	0.0802158	0.283201	0.317876	0.220753	0.145671	0.0884803	0.467496	0.358357	-0.163523	0.134425	0.32007	0.522371	0.75862	0.580186	0.189156	0.381659	0.705996	0.405189	-0.00608232	0.404835	0.454963	0.544715	0.541212	-0.0958684	0.464873	0.26823	0.566819	0.294113	0.411787	0.28968
TCGA-KK-A8I9-01A	0.508571	0.278044	0.653497	0.412251	0.349472	0.196889	0.484789	0.206314	0.533842	0.308458	0.318686	0.48879	0.304174	0.444457	0.377504	0.373973	0.461868	0.291268	0.433362	0.165441	0.296051	0.425128	0.31276	0.280785	0.236794	0.588189	0.495781	-0.154234	0.248642	0.30969	0.545865	0.706717	0.53457	0.250222	0.47383	0.66951	0.496282	-0.0494456	0.424916	0.460056	0.533612	0.581225	-0.135804	0.531711	0.476199	0.592261	0.349941	0.462496	0.303566
TCGA-KK-A8IA-01A	0.489862	0.178154	0.638109	0.285541	0.268237	0.118901	0.387154	0.198929	0.520015	0.203674	0.189052	0.506791	0.373384	0.287296	0.296341	0.294681	0.480489	0.347533	0.386002	0.122059	0.289321	0.333864	0.226836	0.122194	0.0717862	0.466585	0.355984	-0.163897	0.136433	0.334787	0.554883	0.727777	0.516532	0.180234	0.402344	0.689422	0.396623	-0.0391056	0.44191	0.464036	0.565441	0.527353	-0.0771296	0.453869	0.266244	0.581245	0.280071	0.408578	0.245881
TCGA-KK-A8IB-01A	0.535217	0.288875	0.629275	0.334849	0.326256	0.161321	0.476959	0.210162	0.556944	0.307784	0.310462	0.501526	0.342439	0.397497	0.38012	0.384652	0.48905	0.326022	0.424141	0.113908	0.304296	0.398425	0.321365	0.258747	0.20039	0.496386	0.441216	-0.152907	0.215733	0.300837	0.561263	0.726215	0.568438	0.263309	0.427864	0.697911	0.484019	-0.065428	0.425392	0.466185	0.514573	0.59358	-0.115199	0.491772	0.4368	0.571484	0.325252	0.452813	0.302496
TCGA-KK-A8IC-01A	0.531919	0.234474	0.678363	0.406888	0.351066	0.204234	0.485676	0.213404	0.498753	0.290955	0.294651	0.468178	0.31825	0.451628	0.372757	0.368262	0.473998	0.30602	0.426156	0.168623	0.314807	0.438512	0.290977	0.225558	0.174166	0.489167	0.422343	-0.134017	0.231453	0.340844	0.548458	0.708352	0.476561	0.265827	0.487151	0.680845	0.474738	0.018737	0.430897	0.464812	0.579812	0.578485	-0.125622	0.573988	0.438238	0.58027	0.370352	0.446368	0.308226
TCGA-KK-A8ID-01A	0.473636	0.179301	0.681084	0.213342	0.278418	0.142808	0.393038	0.174139	0.526573	0.12323	0.18	0.48943	0.408969	0.210187	0.304132	0.297286	0.453328	0.390732	0.372966	0.155224	0.282597	0.331851	0.217769	0.136031	0.0939643	0.405101	0.341381	-0.165324	0.123113	0.358817	0.564987	0.732931	0.50065	0.207868	0.401223	0.684388	0.422773	-0.0148648	0.407322	0.494834	0.575679	0.522999	-0.091189	0.445931	0.329359	0.582677	0.303126	0.412102	0.255801
TCGA-KK-A8IF-01A	0.487996	0.135899	0.652492	0.221707	0.256649	0.0721089	0.369987	0.260472	0.503817	0.14608	0.168797	0.501235	0.33389	0.273682	0.327149	0.296317	0.473828	0.301726	0.36829	0.0256932	0.303391	0.30209	0.222948	0.0835687	0.0485034	0.436223	0.339798	-0.158415	0.0886303	0.302167	0.540977	0.710283	0.512929	0.185758	0.337035	0.684077	0.419945	-0.0799526	0.440988	0.461868	0.541164	0.527687	-0.0818842	0.422109	0.254978	0.568202	0.271854	0.398019	0.242574
TCGA-KK-A8IG-01A	0.52967	0.215072	0.666764	0.380983	0.361762	0.188316	0.465193	0.226911	0.534431	0.241888	0.245395	0.468455	0.287692	0.439398	0.355578	0.336878	0.498596	0.266002	0.395878	0.12062	0.296602	0.422721	0.274253	0.179069	0.160178	0.41497	0.379074	-0.124474	0.193668	0.297255	0.546613	0.70278	0.461392	0.482311	0.440052	0.689103	0.459046	-0.0681639	0.429801	0.461396	0.560514	0.563889	-0.116395	0.53669	0.413501	0.558052	0.375176	0.42658	0.254741
TCGA-KK-A8IH-01A	0.48566	0.26191	0.610335	0.254113	0.277595	0.137341	0.438342	0.239114	0.517432	0.265855	0.26088	0.478005	0.28673	0.329206	0.33427	0.338162	0.486898	0.260989	0.413582	0.0984692	0.302067	0.366766	0.26458	0.201072	0.128277	0.52546	0.430989	-0.185015	0.182733	0.293751	0.549351	0.699798	0.467069	0.197794	0.372785	0.671548	0.449608	-0.0569996	0.449796	0.457556	0.556949	0.55948	-0.0999771	0.487093	0.349971	0.555015	0.27374	0.427691	0.229308
TCGA-KK-A8II-01A	0.479435	0.19777	0.669165	0.242079	0.273255	0.0620054	0.394622	0.20001	0.528163	0.174279	0.187792	0.474964	0.329888	0.219934	0.297148	0.279837	0.477306	0.319482	0.399915	0.157522	0.278534	0.337731	0.221185	0.134111	0.0794225	0.474294	0.364308	-0.162779	0.13501	0.352754	0.552406	0.715763	0.495576	0.152182	0.364444	0.678365	0.421851	0.00412659	0.426213	0.466996	0.575538	0.533695	-0.0830671	0.476286	0.345723	0.581256	0.267063	0.425658	0.244501
TCGA-KK-A8IJ-01A	0.50769	0.159886	0.701734	0.333401	0.315805	0.151447	0.453008	0.224894	0.544082	0.196635	0.210616	0.468731	0.287158	0.336157	0.359936	0.330368	0.474612	0.289872	0.399597	0.160682	0.301026	0.395619	0.267815	0.173821	0.14732	0.421594	0.336972	-0.169943	0.156276	0.330701	0.545073	0.688363	0.4727	0.223231	0.39513	0.675095	0.450588	-0.0808784	0.428842	0.465388	0.597476	0.548829	-0.093285	0.513046	0.420651	0.589466	0.337252	0.415449	0.27227
TCGA-KK-A8IK-01A	0.499137	0.100718	0.638199	0.175779	0.255588	0.0855897	0.326142	0.242927	0.519008	0.0954644	0.137705	0.516462	0.413294	0.207224	0.306906	0.28914	0.462483	0.375839	0.3537	0.0134675	0.303589	0.282129	0.201061	0.0468668	0.00100553	0.330754	0.249197	-0.159918	0.0704149	0.325753	0.546896	0.724317	0.506255	0.15598	0.360117	0.69604	0.389421	-0.0885044	0.445713	0.460577	0.545398	0.538215	-0.0620219	0.403143	0.20417	0.555854	0.253993	0.364836	0.205192
TCGA-KK-A8IL-01A	0.504707	0.325956	0.665753	0.344179	0.340059	0.204989	0.493227	0.200048	0.523281	0.297652	0.335758	0.481896	0.316928	0.39857	0.370192	0.371375	0.4652	0.31703	0.425908	0.0927869	0.303955	0.411739	0.308154	0.292514	0.253942	0.627578	0.543471	-0.150631	0.251217	0.331721	0.552466	0.721888	0.53605	0.24043	0.423944	0.666571	0.483159	-0.0909837	0.419663	0.471686	0.562434	0.580235	-0.123221	0.535043	0.468373	0.591448	0.336295	0.4642	0.282842
TCGA-KK-A8IM-01A	0.512648	0.242273	0.669332	0.312535	0.333301	0.193215	0.457042	0.223517	0.514448	0.251731	0.25235	0.473331	0.295839	0.368331	0.349249	0.34028	0.488178	0.292919	0.403344	0.145046	0.287387	0.374522	0.255861	0.202186	0.138202	0.558664	0.436352	-0.142912	0.18902	0.327398	0.535904	0.711073	0.478285	0.253958	0.435369	0.677163	0.453029	-0.00703317	0.43284	0.457069	0.587761	0.537074	-0.115762	0.525356	0.341967	0.558697	0.345171	0.41254	0.296152
TCGA-M7-A71Y-01A	0.524325	0.187315	0.630149	0.28077	0.341137	0.222724	0.433665	0.235751	0.50855	0.225633	0.230497	0.507824	0.294451	0.361195	0.360456	0.370022	0.485873	0.264288	0.399022	0.115758	0.297986	0.384941	0.249785	0.118987	0.0973717	0.476999	0.369536	-0.10315	0.173563	0.299	0.515553	0.712421	0.496818	0.29194	0.388759	0.699003	0.462299	-0.000662642	0.438987	0.449984	0.548004	0.557827	-0.114716	0.505641	0.326317	0.554433	0.319114	0.421105	0.2684
TCGA-M7-A71Z-01A	0.499217	0.131263	0.61214	0.207947	0.265812	0.083182	0.326916	0.19187	0.481789	0.160236	0.147054	0.527587	0.351037	0.221086	0.277053	0.292869	0.476176	0.310493	0.404605	0.173348	0.273148	0.327801	0.1895	0.074515	0.0218516	0.317021	0.246304	-0.15054	0.0799514	0.327787	0.533661	0.738019	0.571634	0.193039	0.377119	0.726195	0.399474	-0.0092182	0.436538	0.447757	0.52249	0.540764	-0.0872763	0.436126	0.235962	0.571314	0.228903	0.405777	0.263161
TCGA-M7-A720-01A	0.538939	0.177744	0.678184	0.263668	0.351208	0.25693	0.435195	0.247128	0.559841	0.24992	0.256946	0.470564	0.276572	0.346688	0.376146	0.379052	0.500012	0.258556	0.412081	0.118527	0.312324	0.412298	0.245083	0.143879	0.100507	0.477742	0.367497	-0.100393	0.181148	0.315815	0.537653	0.683691	0.431354	0.29528	0.411861	0.685314	0.455841	-0.0524783	0.45979	0.450262	0.581917	0.569457	-0.114516	0.497569	0.329213	0.553873	0.345854	0.417299	0.277279
TCGA-M7-A721-01A	0.531918	0.21028	0.687662	0.309297	0.324777	0.193235	0.422603	0.250335	0.534456	0.265967	0.265798	0.477813	0.303418	0.357464	0.372383	0.367997	0.492358	0.287392	0.411981	0.135611	0.307475	0.36871	0.240771	0.157022	0.107919	0.461953	0.397053	-0.129781	0.184429	0.321684	0.544356	0.69899	0.477042	0.250548	0.465205	0.681989	0.436184	-0.00101183	0.447654	0.457534	0.578635	0.565758	-0.122777	0.478529	0.315364	0.560807	0.34321	0.418015	0.280319
TCGA-M7-A722-01A	0.483872	0.189652	0.551939	0.18734	0.244799	0.104498	0.355703	0.209504	0.489755	0.228761	0.195449	0.551618	0.400671	0.22625	0.287611	0.3049	0.465893	0.348422	0.388047	0.0755239	0.28002	0.285504	0.21632	0.0857962	0.0507571	0.353198	0.307617	-0.16874	0.0759381	0.295143	0.51472	0.731481	0.57373	0.181625	0.319704	0.714903	0.410267	-0.0917013	0.426117	0.442997	0.485752	0.556834	-0.0868727	0.404118	0.215583	0.522797	0.23088	0.404431	0.220958
TCGA-M7-A723-01A	0.544954	0.307525	0.652803	0.324138	0.330879	0.213306	0.456838	0.231201	0.53284	0.282142	0.305108	0.490535	0.277745	0.390964	0.34296	0.35171	0.499548	0.250684	0.414783	0.115103	0.299125	0.416019	0.284129	0.230853	0.165127	0.55609	0.473058	-0.14289	0.217508	0.262907	0.540381	0.70239	0.46616	0.311733	0.419504	0.706495	0.453676	-0.00379253	0.432255	0.454572	0.555451	0.588015	-0.104929	0.496148	0.3729	0.556251	0.338522	0.457255	0.239439
TCGA-M7-A724-01A	0.487708	0.0862135	0.587532	0.219366	0.233972	0.0700102	0.339324	0.165692	0.500541	0.11028	0.131053	0.551238	0.475169	0.155048	0.300819	0.293802	0.451283	0.417831	0.398924	0.0834822	0.274334	0.331885	0.189108	0.0598598	0.0467992	0.334307	0.23815	-0.181193	0.0516083	0.347746	0.549789	0.747026	0.595562	0.127287	0.352319	0.70225	0.410703	-0.145046	0.422967	0.454964	0.504561	0.547964	-0.0599094	0.359622	0.259432	0.598928	0.204433	0.404684	0.236973
TCGA-M7-A725-01A	0.497422	0.195488	0.663825	0.318495	0.282572	0.121067	0.414901	0.211994	0.544719	0.210546	0.227732	0.496942	0.399211	0.28564	0.341838	0.336221	0.478149	0.379291	0.406538	0.0878085	0.298436	0.345749	0.232736	0.134245	0.104296	0.592029	0.446846	-0.134883	0.145112	0.359781	0.571557	0.722771	0.482647	0.17355	0.378745	0.689872	0.430346	-0.0980021	0.456835	0.477158	0.579773	0.53145	-0.0763615	0.446375	0.313748	0.58991	0.287012	0.42648	0.208634
TCGA-MG-AAMC-01A	0.482707	0.203193	0.629119	0.250693	0.246632	0.0785459	0.40262	0.212455	0.52439	0.224359	0.230589	0.50896	0.302631	0.258526	0.294576	0.290785	0.484926	0.280492	0.383364	0.114786	0.273522	0.344137	0.239134	0.137549	0.0755384	0.455976	0.3591	-0.168685	0.14965	0.286369	0.531714	0.723122	0.510141	0.186602	0.351462	0.707124	0.419839	0.0131519	0.451123	0.455777	0.535064	0.563976	-0.0566303	0.441959	0.313663	0.570299	0.236683	0.426945	0.222422
TCGA-QU-A6IL-01A	0.499678	0.213312	0.573592	0.213409	0.255222	0.126509	0.429089	0.198432	0.524317	0.264528	0.253484	0.525713	0.318919	0.275597	0.344655	0.343285	0.458579	0.292431	0.386155	0.0561867	0.274789	0.373053	0.273204	0.170928	0.130456	0.46195	0.404191	-0.119817	0.172276	0.262242	0.504919	0.701101	0.560959	0.245812	0.395217	0.688616	0.460045	-0.0148064	0.419486	0.440051	0.447357	0.573956	-0.0886328	0.415581	0.397066	0.535927	0.234494	0.434374	0.214584
TCGA-QU-A6IM-01A	0.503311	0.307511	0.586758	0.213131	0.28965	0.216817	0.442034	0.227692	0.520454	0.278004	0.295099	0.516689	0.285736	0.285498	0.327974	0.355108	0.477058	0.240896	0.405236	0.0659185	0.277179	0.39074	0.288774	0.229566	0.140309	0.548482	0.463206	-0.0952938	0.181508	0.239269	0.505307	0.677311	0.541266	0.285237	0.405148	0.691192	0.473377	-0.0666679	0.419485	0.432509	0.439958	0.595945	-0.092721	0.409412	0.390862	0.52511	0.242286	0.467292	0.23328
TCGA-QU-A6IN-01A	0.479325	0.15948	0.518561	0.153548	0.235494	0.109163	0.364923	0.17114	0.471519	0.20401	0.185432	0.537002	0.31795	0.225582	0.29012	0.292452	0.447105	0.277334	0.367441	0.0451876	0.268037	0.322176	0.228267	0.098305	0.0526297	0.385024	0.298671	-0.156447	0.103294	0.275144	0.495534	0.719127	0.59527	0.218732	0.374339	0.695468	0.424719	-0.034522	0.407735	0.434664	0.460116	0.561382	-0.0860532	0.404389	0.266039	0.528517	0.197282	0.406942	0.227788
TCGA-QU-A6IO-01A	0.507073	0.26373	0.590341	0.235616	0.292208	0.217651	0.423983	0.222372	0.521886	0.276321	0.265958	0.521007	0.283555	0.262901	0.347677	0.362959	0.474696	0.245684	0.411408	0.0774533	0.2795	0.375594	0.267829	0.197462	0.120131	0.464136	0.396713	-0.102662	0.176949	0.254599	0.498458	0.685487	0.541076	0.274951	0.403477	0.687997	0.462463	-0.0726424	0.418627	0.433738	0.459027	0.567048	-0.109576	0.406618	0.347535	0.537521	0.231401	0.44217	0.247693
TCGA-QU-A6IP-01A	0.531568	0.221959	0.649924	0.264784	0.311115	0.175964	0.44589	0.227353	0.519696	0.2596	0.251493	0.494016	0.293664	0.323241	0.335426	0.338842	0.496619	0.274164	0.413275	0.104589	0.287403	0.387113	0.24352	0.173476	0.0971357	0.45982	0.373199	-0.129911	0.169095	0.307364	0.522656	0.706159	0.499966	0.275041	0.422775	0.693808	0.462655	-0.0475709	0.445445	0.451435	0.539956	0.563469	-0.10379	0.471475	0.349345	0.559915	0.307864	0.426373	0.293576
TCGA-SU-A7E7-01A	0.49943	0.263057	0.661865	0.32901	0.339986	0.212605	0.500092	0.211654	0.516966	0.282704	0.30567	0.466123	0.287099	0.376636	0.364514	0.350872	0.460085	0.284668	0.404059	0.196569	0.307517	0.423446	0.284597	0.250309	0.199858	0.547538	0.478936	-0.128183	0.24824	0.338479	0.533685	0.696588	0.456216	0.234331	0.4302	0.658725	0.481212	-0.042281	0.425403	0.464152	0.585167	0.543795	-0.124338	0.551639	0.480302	0.580699	0.355578	0.443608	0.29965
TCGA-TK-A8OK-01A	0.522114	0.206078	0.620705	0.460784	0.389741	0.230724	0.50415	0.214249	0.499285	0.267881	0.266966	0.438654	0.272448	0.551497	0.359069	0.339738	0.451933	0.268237	0.398726	0.193915	0.298444	0.46114	0.3053	0.197545	0.178427	0.453151	0.386698	-0.139639	0.259558	0.341066	0.496887	0.677374	0.38374	0.353893	0.482206	0.667377	0.467411	0.0643565	0.418736	0.432052	0.577821	0.527387	-0.111524	0.605773	0.451622	0.540867	0.452766	0.432784	0.348524
TCGA-TP-A8TT-01A	0.51451	0.366222	0.655769	0.335115	0.342068	0.178056	0.471735	0.213649	0.500647	0.308852	0.34422	0.461	0.269184	0.386983	0.349275	0.350371	0.494542	0.26173	0.400715	0.170862	0.302828	0.384959	0.291026	0.267109	0.187415	0.595917	0.536458	-0.148724	0.253168	0.321839	0.541629	0.697652	0.421987	0.225216	0.400152	0.680955	0.450355	0.0369677	0.43291	0.468425	0.597504	0.566161	-0.0905786	0.50838	0.385165	0.563801	0.350316	0.447957	0.266426
TCGA-TP-A8TV-01A	0.501676	0.128225	0.669164	0.263966	0.272697	0.113157	0.357624	0.228122	0.534969	0.194022	0.183645	0.497568	0.342477	0.261588	0.314637	0.300664	0.480421	0.310812	0.3824	0.0890156	0.288333	0.307391	0.196196	0.0791018	0.0482218	0.384883	0.300814	-0.149408	0.0852171	0.331682	0.538057	0.703214	0.516396	0.178521	0.398889	0.682209	0.401919	-0.119023	0.428469	0.458853	0.551405	0.541759	-0.111036	0.438966	0.267207	0.574385	0.291506	0.398146	0.226012
TCGA-V1-A8MF-01A	0.539558	0.274656	0.674925	0.325581	0.320604	0.167087	0.476817	0.219743	0.523265	0.244402	0.281981	0.488579	0.290439	0.354813	0.365079	0.348018	0.491885	0.268625	0.41663	0.107639	0.305785	0.411138	0.286552	0.218778	0.164249	0.505978	0.43581	-0.153665	0.210433	0.295948	0.538806	0.706018	0.520745	0.249775	0.395824	0.701549	0.476207	-0.0780387	0.427625	0.462112	0.558819	0.573398	-0.116558	0.491864	0.417124	0.57728	0.324139	0.445222	0.249529
TCGA-V1-A8MG-01A	0.520548	0.221697	0.648012	0.31935	0.34719	0.193526	0.447282	0.237337	0.533814	0.226281	0.235856	0.491721	0.304772	0.372284	0.357544	0.332487	0.480519	0.288945	0.405101	0.123702	0.295897	0.372664	0.235927	0.183038	0.134726	0.521097	0.418984	-0.140377	0.165184	0.317898	0.525613	0.705028	0.478002	0.269832	0.422734	0.677843	0.449381	-0.074773	0.438009	0.451375	0.549079	0.537508	-0.116261	0.512931	0.339616	0.56658	0.351147	0.430858	0.284341
TCGA-V1-A8MK-01A	0.538446	0.214381	0.679526	0.323888	0.343408	0.23665	0.45129	0.229136	0.545999	0.239061	0.237593	0.466201	0.270251	0.353127	0.36092	0.340137	0.504063	0.26334	0.415604	0.150661	0.302916	0.406487	0.246951	0.169572	0.114358	0.48365	0.393853	-0.13119	0.166802	0.308953	0.549425	0.693303	0.449077	0.303288	0.439626	0.689215	0.449194	-0.0409185	0.445065	0.455922	0.57502	0.569418	-0.12008	0.512331	0.352578	0.564556	0.364773	0.437198	0.28914
TCGA-V1-A8ML-01A	0.5334	0.155752	0.670939	0.299251	0.308456	0.189209	0.411923	0.23685	0.518698	0.216029	0.204788	0.494596	0.294103	0.354021	0.332065	0.31717	0.498439	0.283662	0.403792	0.155671	0.299422	0.366686	0.221294	0.128794	0.0894228	0.426705	0.332235	-0.160899	0.164192	0.302175	0.54162	0.710226	0.515997	0.267445	0.377935	0.708177	0.426831	-0.0582742	0.443607	0.451755	0.565331	0.547767	-0.113552	0.47095	0.314708	0.580664	0.331737	0.411812	0.259918
TCGA-V1-A8MM-01A	0.502704	0.259956	0.610295	0.310017	0.291295	0.112536	0.417569	0.193519	0.500186	0.211341	0.241583	0.50378	0.315659	0.346602	0.31472	0.300496	0.459426	0.283765	0.39471	0.11081	0.285746	0.351775	0.257251	0.195961	0.124278	0.547195	0.45726	-0.160826	0.169744	0.301172	0.533032	0.698626	0.502173	0.227001	0.401547	0.684431	0.4397	-0.0958967	0.424689	0.450444	0.534412	0.542237	-0.136949	0.474692	0.309045	0.554702	0.294972	0.438505	0.260749
TCGA-V1-A8MU-01A	0.5348	0.266265	0.644732	0.385665	0.360439	0.226546	0.460776	0.215843	0.50706	0.274583	0.280665	0.475106	0.282782	0.419562	0.365668	0.360612	0.480552	0.27125	0.403954	0.151351	0.306664	0.39753	0.291029	0.237108	0.162138	0.511213	0.431698	-0.134512	0.223369	0.309527	0.524354	0.686591	0.439218	0.298458	0.452482	0.682061	0.457122	0.00652596	0.437731	0.460546	0.549747	0.563462	-0.125123	0.50426	0.374854	0.551882	0.367854	0.429376	0.285147
TCGA-V1-A8WL-01A	0.515811	0.266304	0.664704	0.299931	0.321946	0.178694	0.470381	0.216594	0.535051	0.270461	0.28548	0.47761	0.276239	0.37253	0.358361	0.34383	0.487723	0.265037	0.402562	0.116676	0.298754	0.401618	0.279021	0.24946	0.161689	0.551869	0.448842	-0.141808	0.211169	0.299216	0.547189	0.69782	0.476813	0.270247	0.398422	0.684282	0.455815	-0.0533777	0.429442	0.459968	0.573165	0.554739	-0.113881	0.50304	0.411924	0.588984	0.34296	0.42955	0.238194
TCGA-V1-A8WN-01A	0.517333	0.221201	0.706953	0.294387	0.345909	0.219997	0.478787	0.237126	0.56464	0.22311	0.253701	0.445761	0.283141	0.366736	0.368665	0.331148	0.488098	0.287823	0.407551	0.174093	0.312402	0.418207	0.255088	0.178202	0.149418	0.51252	0.424802	-0.138661	0.167169	0.342654	0.545828	0.682495	0.412616	0.275286	0.418955	0.659061	0.452789	-0.0198742	0.444823	0.456593	0.604436	0.55304	-0.10304	0.549647	0.402536	0.565738	0.386429	0.434006	0.283092
TCGA-V1-A8WS-01A	0.506416	0.176026	0.653447	0.246184	0.288588	0.114807	0.376739	0.179489	0.440538	0.183237	0.173595	0.49851	0.349941	0.280675	0.301268	0.285793	0.465484	0.322881	0.3846	0.0841019	0.28928	0.322578	0.204887	0.126833	0.0614924	0.366307	0.288477	-0.160867	0.0824178	0.348567	0.525229	0.749125	0.549553	0.201277	0.379055	0.702373	0.393304	-0.0525745	0.419887	0.45786	0.562668	0.523735	-0.105268	0.480987	0.271414	0.574721	0.315633	0.399134	0.281735
TCGA-V1-A8WV-01A	0.492464	0.271923	0.5655	0.342229	0.335459	0.155872	0.446734	0.18385	0.476596	0.256503	0.2729	0.502108	0.38285	0.349163	0.322748	0.334112	0.448861	0.361343	0.401025	0.136493	0.276727	0.356381	0.299464	0.237781	0.137455	0.522428	0.426659	-0.162629	0.212252	0.345793	0.528086	0.718095	0.525838	0.241366	0.405982	0.668343	0.455489	-0.00156278	0.41869	0.452703	0.504289	0.551097	-0.0910928	0.501715	0.336863	0.553931	0.311032	0.43113	0.300731
TCGA-V1-A8WW-01A	0.502245	0.233745	0.634062	0.337423	0.32377	0.147244	0.439703	0.234368	0.618977	0.247508	0.270948	0.480837	0.332068	0.373649	0.333073	0.345547	0.487523	0.329149	0.43436	0.1742	0.312027	0.382391	0.250351	0.182986	0.121006	0.643918	0.493323	-0.15377	0.191845	0.346217	0.584958	0.698559	0.459027	0.241104	0.402814	0.680105	0.449118	0.00314752	0.436871	0.476993	0.564755	0.602224	-0.081165	0.502112	0.321941	0.578069	0.302751	0.449138	0.251189
TCGA-V1-A8X3-01A	0.52043	0.19687	0.676493	0.308873	0.320854	0.176729	0.450612	0.225762	0.537017	0.199812	0.221285	0.466274	0.285686	0.364171	0.345376	0.322386	0.479817	0.285521	0.399717	0.141131	0.29875	0.385632	0.264602	0.19155	0.127463	0.496808	0.398949	-0.169226	0.168161	0.328989	0.532623	0.698289	0.484406	0.273409	0.376337	0.674673	0.440777	-0.0847061	0.429562	0.460854	0.572475	0.5289	-0.110951	0.516805	0.363422	0.570918	0.366412	0.42092	0.264785
TCGA-V1-A9O5-01A	0.497161	0.316988	0.63714	0.315061	0.326554	0.174655	0.456434	0.223945	0.529279	0.261414	0.295032	0.488626	0.430495	0.354558	0.330301	0.341235	0.479863	0.40392	0.425711	0.126087	0.320973	0.35431	0.300735	0.259899	0.17009	0.645307	0.514307	-0.136162	0.203364	0.372398	0.57758	0.727468	0.531975	0.192628	0.38514	0.683381	0.451243	-0.0556019	0.464805	0.467074	0.55983	0.585067	-0.0835419	0.490262	0.359698	0.572825	0.282111	0.441485	0.26711
TCGA-V1-A9O7-01A	0.533229	0.241034	0.639185	0.403339	0.394832	0.231105	0.502317	0.210542	0.524681	0.272657	0.28032	0.464959	0.312804	0.482585	0.392734	0.379881	0.481859	0.311102	0.410652	0.168578	0.297213	0.473669	0.311834	0.232818	0.213774	0.45136	0.409454	-0.0948571	0.243561	0.339361	0.541928	0.711724	0.495916	0.550272	0.453925	0.694764	0.493222	-0.0281064	0.423024	0.457768	0.541667	0.561376	-0.108365	0.553079	0.516539	0.555649	0.399612	0.446702	0.31552
TCGA-V1-A9O9-01A	0.499336	0.381295	0.669132	0.31772	0.337417	0.158469	0.463169	0.197157	0.509731	0.300719	0.333463	0.479149	0.323705	0.363543	0.336072	0.348438	0.490924	0.314577	0.402231	0.161508	0.296429	0.363509	0.318401	0.307654	0.18124	0.585515	0.507144	-0.155722	0.255837	0.345563	0.548704	0.71235	0.479968	0.205254	0.411894	0.660802	0.446871	-0.0109107	0.424698	0.472786	0.570391	0.562468	-0.106787	0.514169	0.375739	0.570919	0.326691	0.440816	0.262336
TCGA-V1-A9OA-01A	0.516495	0.2054	0.623288	0.343405	0.369102	0.23371	0.468549	0.22731	0.490277	0.24323	0.231656	0.471433	0.299829	0.445004	0.360241	0.348893	0.470609	0.27988	0.394692	0.135964	0.290498	0.410895	0.266132	0.177675	0.147632	0.468882	0.37101	-0.110597	0.205465	0.319714	0.498487	0.698372	0.458696	0.303856	0.450992	0.676475	0.467298	-0.0385772	0.42844	0.429659	0.554506	0.536837	-0.129273	0.558223	0.36344	0.53577	0.412475	0.411518	0.336538
TCGA-V1-A9OF-01A	0.506231	0.16478	0.695526	0.192744	0.28883	0.14285	0.359082	0.263573	0.520462	0.173267	0.192793	0.491029	0.316327	0.218852	0.322526	0.306289	0.503636	0.292663	0.368339	0.0816593	0.308774	0.313497	0.199343	0.100618	0.0660062	0.404253	0.313525	-0.155068	0.124518	0.31554	0.537244	0.704377	0.470999	0.179636	0.36303	0.691293	0.396231	-0.049118	0.444561	0.463679	0.584138	0.538116	-0.0763509	0.433876	0.209403	0.5509	0.301679	0.382141	0.21406
TCGA-V1-A9OH-01A	0.533441	0.195093	0.658093	0.324504	0.318636	0.181042	0.415166	0.217972	0.50041	0.206772	0.222489	0.493742	0.32209	0.362207	0.366989	0.356207	0.476307	0.305722	0.396484	0.131518	0.306159	0.362361	0.239116	0.141368	0.103051	0.436614	0.364524	-0.138715	0.177077	0.321903	0.542594	0.716153	0.503341	0.262573	0.390937	0.698744	0.436503	-0.0130891	0.445209	0.460312	0.571581	0.54045	-0.107056	0.489412	0.301391	0.581431	0.333624	0.415632	0.264403
TCGA-V1-A9OL-01A	0.494785	0.238574	0.659149	0.31538	0.307976	0.138176	0.418481	0.190895	0.508755	0.225142	0.235717	0.506352	0.417939	0.336703	0.310676	0.316057	0.475082	0.391633	0.402565	0.132963	0.298577	0.354303	0.247591	0.17124	0.100849	0.500358	0.406256	-0.185989	0.140634	0.369018	0.554155	0.722346	0.504181	0.194236	0.400505	0.687298	0.409548	-0.109831	0.425584	0.471223	0.563316	0.5577	-0.0734746	0.484468	0.293816	0.576174	0.300226	0.414684	0.251911
TCGA-V1-A9OQ-01A	0.537495	0.225803	0.64743	0.291066	0.308712	0.159204	0.431012	0.230343	0.520044	0.251924	0.255941	0.507524	0.295939	0.332277	0.335942	0.320419	0.499348	0.271535	0.408493	0.110114	0.307775	0.365698	0.254395	0.179474	0.105246	0.436369	0.373999	-0.152295	0.174002	0.284069	0.54924	0.708523	0.495912	0.410394	0.425794	0.708129	0.435824	-0.0785523	0.439385	0.456372	0.553777	0.562443	-0.10234	0.45731	0.320043	0.566407	0.310557	0.426987	0.253554
TCGA-V1-A9OT-01A	0.489005	0.239599	0.580978	0.250219	0.313879	0.159161	0.387766	0.170173	0.476969	0.267213	0.264043	0.500517	0.273609	0.31845	0.301024	0.311724	0.444372	0.260985	0.374907	0.0903404	0.272938	0.334533	0.250329	0.174404	0.0895545	0.436908	0.363651	-0.137501	0.167219	0.295868	0.480666	0.682597	0.469135	0.265036	0.398051	0.662106	0.408337	-0.0313629	0.397281	0.439547	0.492778	0.531187	-0.119408	0.451185	0.263101	0.51943	0.303615	0.413024	0.26338
TCGA-V1-A9OX-01A	0.524553	0.229435	0.646186	0.298777	0.330961	0.231622	0.448386	0.234982	0.526088	0.256397	0.265932	0.489327	0.29136	0.337772	0.360579	0.367497	0.487401	0.268871	0.417213	0.124227	0.303504	0.390916	0.26145	0.206702	0.130475	0.505458	0.410952	-0.110555	0.20036	0.290511	0.521525	0.688828	0.467174	0.27183	0.427419	0.693689	0.461472	-0.044325	0.440451	0.452759	0.531801	0.571316	-0.118758	0.457538	0.367974	0.55842	0.304747	0.432078	0.267855
TCGA-V1-A9OY-01A	0.519626	0.248902	0.658395	0.33476	0.339301	0.194273	0.440353	0.219362	0.499492	0.269441	0.258467	0.489039	0.297436	0.366827	0.343263	0.35104	0.488269	0.281827	0.408422	0.156845	0.291949	0.377718	0.26724	0.190007	0.126881	0.490737	0.395538	-0.125821	0.197174	0.30539	0.532869	0.70812	0.4762	0.251488	0.429425	0.682411	0.446843	0.00012767	0.43801	0.452315	0.550148	0.565178	-0.111643	0.496987	0.339323	0.566404	0.322967	0.438999	0.294626
TCGA-V1-A9Z7-01A	0.53846	0.239707	0.633851	0.354789	0.333013	0.186738	0.410266	0.245539	0.477247	0.237541	0.231235	0.508322	0.362713	0.445024	0.320832	0.289101	0.485449	0.330897	0.39757	0.195785	0.308237	0.363368	0.257777	0.181087	0.130154	0.451924	0.382593	-0.200977	0.198223	0.329718	0.550954	0.742042	0.538855	0.2611	0.386205	0.701704	0.408855	-0.0430378	0.450747	0.451309	0.567279	0.567662	-0.112999	0.502298	0.314117	0.561062	0.363702	0.420047	0.230418
TCGA-V1-A9Z8-01A	0.543529	0.233502	0.6308	0.384476	0.356146	0.226406	0.459295	0.226878	0.503777	0.265639	0.268287	0.503584	0.352272	0.420233	0.345266	0.353496	0.495126	0.310118	0.412553	0.107076	0.300642	0.394993	0.276174	0.19652	0.13233	0.496376	0.403819	-0.163536	0.216972	0.312969	0.545019	0.726814	0.466447	0.304409	0.430143	0.704586	0.457681	-0.0718763	0.449533	0.468095	0.558791	0.570453	-0.109315	0.497263	0.318964	0.546786	0.365352	0.426729	0.301095
TCGA-V1-A9Z9-01A	0.527404	0.192479	0.677984	0.354748	0.331591	0.186499	0.415759	0.227041	0.523316	0.267968	0.237666	0.484523	0.306892	0.38395	0.350041	0.350902	0.498588	0.284043	0.408632	0.181055	0.302579	0.364969	0.232756	0.149833	0.0999144	0.458409	0.376109	-0.147296	0.185938	0.315003	0.538176	0.701473	0.478955	0.262357	0.43438	0.691408	0.426563	-0.028292	0.450995	0.455283	0.560433	0.547445	-0.126857	0.483734	0.305194	0.569917	0.334024	0.419251	0.273127
TCGA-V1-A9ZG-01A	0.508711	0.20731	0.648083	0.419369	0.337403	0.181335	0.458663	0.218624	0.494193	0.261098	0.242877	0.474204	0.316278	0.427177	0.353905	0.337193	0.458998	0.298443	0.432401	0.253067	0.301877	0.402329	0.262539	0.167961	0.14533	0.442027	0.375026	-0.123599	0.188837	0.342244	0.547634	0.714213	0.488086	0.240748	0.431335	0.683307	0.473655	-0.0465551	0.437138	0.463198	0.575983	0.544555	-0.104531	0.55249	0.3976	0.573518	0.376954	0.422082	0.311798
TCGA-V1-A9ZI-01A	0.516856	0.233853	0.621066	0.356607	0.322704	0.141826	0.388759	0.188842	0.495351	0.247788	0.241444	0.504409	0.336928	0.391981	0.319141	0.3153	0.457337	0.309513	0.384887	0.124192	0.281102	0.348458	0.240313	0.133772	0.121452	0.429836	0.367663	-0.148113	0.205124	0.314054	0.523773	0.719951	0.530275	0.272704	0.387806	0.684925	0.41087	-0.0721685	0.406257	0.447285	0.509103	0.556549	-0.0770819	0.487638	0.275174	0.560187	0.319603	0.420321	0.31087
TCGA-V1-A9ZK-01A	0.529692	0.178681	0.727828	0.311168	0.343693	0.211283	0.427067	0.246571	0.555668	0.210911	0.233297	0.473645	0.303357	0.359658	0.375411	0.354025	0.49381	0.293903	0.401362	0.150232	0.314961	0.387572	0.23154	0.129091	0.11222	0.444787	0.367542	-0.128225	0.162085	0.328183	0.541858	0.69235	0.442838	0.257902	0.447232	0.680259	0.432707	-0.0355639	0.45235	0.462422	0.592215	0.575567	-0.114459	0.497654	0.31856	0.559575	0.37195	0.409182	0.24923
TCGA-V1-A9ZR-01A	0.514955	0.297607	0.570598	0.368474	0.361882	0.208121	0.461959	0.194359	0.451013	0.263365	0.281414	0.495058	0.269053	0.43727	0.329166	0.311809	0.465807	0.247282	0.379132	0.127383	0.30182	0.392542	0.297168	0.254983	0.168814	0.502164	0.421926	-0.158594	0.223355	0.315476	0.487415	0.705744	0.448992	0.307537	0.391303	0.676912	0.459641	-0.00395519	0.397937	0.440933	0.546239	0.540247	-0.154791	0.524239	0.358921	0.531665	0.361396	0.430814	0.283744
TCGA-VN-A88I-01A	0.526931	0.259105	0.574872	0.432668	0.421396	0.265913	0.479007	0.180327	0.467428	0.293862	0.291527	0.468822	0.260625	0.516231	0.366673	0.360492	0.45763	0.244298	0.409339	0.182876	0.297481	0.443935	0.326791	0.256359	0.182157	0.489073	0.418006	-0.118573	0.249183	0.310904	0.491813	0.678218	0.419046	0.464668	0.482627	0.67171	0.49257	-0.0523317	0.400752	0.447941	0.519371	0.556986	-0.136843	0.547103	0.415959	0.523514	0.396301	0.444719	0.362954
TCGA-VN-A88K-01A	0.510008	0.169365	0.643941	0.369349	0.31407	0.124499	0.426064	0.208343	0.496991	0.195499	0.230327	0.493127	0.305999	0.368072	0.317151	0.3002	0.476129	0.293226	0.384054	0.148187	0.295793	0.389653	0.25664	0.138975	0.113084	0.482607	0.362457	-0.174799	0.173591	0.327495	0.532619	0.725528	0.540116	0.238768	0.422477	0.688946	0.434176	0.0221157	0.420746	0.463637	0.543098	0.5388	-0.108371	0.530188	0.338127	0.572584	0.329833	0.431448	0.375991
TCGA-VN-A88L-01A	0.52583	0.193442	0.652069	0.423238	0.32852	0.172206	0.447126	0.207541	0.500787	0.295751	0.253199	0.467678	0.278581	0.4036	0.340841	0.345966	0.488078	0.275424	0.412819	0.187571	0.296068	0.415646	0.262552	0.131012	0.108511	0.424209	0.347268	-0.140935	0.197167	0.323873	0.527472	0.704694	0.44646	0.283588	0.427462	0.686446	0.430391	0.0367752	0.434093	0.454358	0.577555	0.541591	-0.107723	0.524158	0.369319	0.575587	0.350804	0.427373	0.299069
TCGA-VN-A88M-01A	0.49262	0.196259	0.642099	0.251842	0.273468	0.135146	0.417035	0.218671	0.546496	0.215418	0.213605	0.500316	0.305691	0.277427	0.312987	0.31057	0.477535	0.288254	0.402908	0.13258	0.273808	0.367818	0.241644	0.12257	0.0696635	0.430086	0.339162	-0.145266	0.146038	0.29792	0.539147	0.717249	0.532344	0.204526	0.391917	0.696429	0.4333	0.0171349	0.441903	0.456978	0.528236	0.557943	-0.0822018	0.47191	0.337156	0.567909	0.268968	0.420495	0.284386
TCGA-VN-A88N-01A	0.503541	0.151516	0.666856	0.273725	0.282426	0.156834	0.399779	0.197695	0.518836	0.16289	0.19749	0.496784	0.343498	0.265056	0.321863	0.311905	0.481942	0.321963	0.390063	0.125697	0.292531	0.344765	0.22292	0.114685	0.0770183	0.425452	0.338521	-0.150698	0.12906	0.329252	0.54501	0.700114	0.468089	0.194581	0.412652	0.685188	0.440001	-0.0722334	0.436285	0.471079	0.572173	0.551799	-0.0917939	0.467419	0.310397	0.575091	0.285403	0.410231	0.268179
TCGA-VN-A88O-01A	0.506256	0.223504	0.696027	0.277758	0.317669	0.158909	0.450343	0.222614	0.546778	0.196965	0.235876	0.486926	0.305028	0.312653	0.336373	0.309634	0.483698	0.285257	0.401553	0.107938	0.30061	0.397754	0.251758	0.214927	0.152435	0.573356	0.44785	-0.132971	0.177619	0.314049	0.547297	0.698941	0.478907	0.335697	0.413017	0.677065	0.45161	-0.049833	0.42121	0.472048	0.546865	0.569196	-0.102892	0.483951	0.407336	0.577564	0.314622	0.441125	0.228816
TCGA-VN-A88P-01A	0.522004	0.223199	0.644082	0.325518	0.316095	0.135649	0.438258	0.209466	0.482361	0.230145	0.240818	0.485939	0.277101	0.365435	0.344632	0.316376	0.49001	0.266081	0.408601	0.116763	0.296075	0.381867	0.258319	0.19867	0.130236	0.462103	0.385432	-0.167062	0.173816	0.301993	0.531892	0.71783	0.521478	0.432161	0.386179	0.704157	0.436541	-0.0068088	0.420059	0.460612	0.559962	0.549005	-0.129851	0.496308	0.349523	0.578139	0.323809	0.430286	0.244737
TCGA-VN-A88Q-01A	0.498065	0.190797	0.66068	0.306499	0.298339	0.14873	0.405386	0.18229	0.489889	0.223848	0.215762	0.482945	0.29896	0.289886	0.328833	0.316019	0.462522	0.294022	0.39922	0.163066	0.295989	0.360434	0.244382	0.168942	0.112185	0.390742	0.323536	-0.13362	0.176096	0.346055	0.529749	0.715554	0.512698	0.202407	0.434141	0.681466	0.433825	0.0284088	0.418173	0.467174	0.567978	0.533485	-0.119387	0.509242	0.379658	0.577059	0.307325	0.411175	0.320675
TCGA-VN-A88R-01A	0.524015	0.186028	0.663536	0.286476	0.302358	0.126596	0.389551	0.225197	0.522672	0.176197	0.19775	0.503933	0.332722	0.30704	0.301921	0.2945	0.490397	0.306851	0.397947	0.099798	0.295534	0.340915	0.209286	0.106837	0.0751126	0.490695	0.379135	-0.197884	0.119482	0.306041	0.547566	0.706474	0.510056	0.203298	0.385863	0.70846	0.420968	-0.0757206	0.424654	0.466399	0.541469	0.567682	-0.111816	0.454858	0.269163	0.571426	0.277729	0.415365	0.24666
TCGA-VN-A943-01A	0.504363	0.089212	0.697375	0.158898	0.241631	0.0955063	0.34206	0.206937	0.545262	0.127611	0.135545	0.501538	0.320604	0.151798	0.314305	0.281293	0.501261	0.298751	0.373724	0.0849662	0.30027	0.301119	0.180647	0.06852	0.0398958	0.371123	0.272057	-0.165505	0.0608644	0.312599	0.545179	0.709571	0.523303	0.150474	0.347251	0.699642	0.385989	-0.144453	0.426448	0.458636	0.583354	0.548423	-0.0942148	0.39924	0.274522	0.583471	0.258923	0.39969	0.200854
TCGA-VP-A872-01A	0.508021	0.302193	0.593951	0.351466	0.338954	0.173613	0.461097	0.229303	0.565009	0.342715	0.306436	0.494507	0.313138	0.435564	0.350814	0.372108	0.493026	0.27881	0.449649	0.143884	0.292491	0.397343	0.304347	0.251851	0.164161	0.49305	0.436069	-0.164438	0.228574	0.314933	0.548045	0.689787	0.462659	0.275115	0.441091	0.668489	0.461372	-0.0382005	0.437031	0.4595	0.547974	0.583467	-0.113623	0.517648	0.395187	0.547383	0.299874	0.459821	0.263969
TCGA-VP-A875-01A	0.470018	0.128189	0.647672	0.202317	0.256082	0.0850946	0.334446	0.216169	0.463204	0.132062	0.133339	0.491418	0.33768	0.230465	0.311995	0.272078	0.461865	0.319266	0.351498	0.0870455	0.282405	0.278898	0.217304	0.100312	0.0418423	0.375156	0.275906	-0.18844	0.0860086	0.344926	0.510391	0.730984	0.541345	0.15779	0.369779	0.675717	0.370738	0.0406901	0.442556	0.45725	0.562892	0.510465	-0.111962	0.459459	0.235336	0.558758	0.267717	0.367602	0.248771
TCGA-VP-A876-01A	0.490116	0.187561	0.657801	0.235265	0.265908	0.0968007	0.414956	0.182375	0.478757	0.16345	0.181094	0.503746	0.385024	0.244338	0.314757	0.310739	0.479315	0.368613	0.391838	0.115371	0.277746	0.340789	0.220231	0.1346	0.0638667	0.405645	0.317882	-0.175495	0.137455	0.367064	0.53087	0.739618	0.524636	0.184875	0.385428	0.685311	0.41657	0.0629	0.43023	0.457952	0.569265	0.52476	-0.0785418	0.464712	0.31436	0.578648	0.288504	0.39794	0.262064
TCGA-VP-A878-01A	0.533356	0.240079	0.673845	0.416582	0.35873	0.185561	0.461497	0.231162	0.518739	0.308377	0.300862	0.479806	0.290068	0.401293	0.371109	0.366409	0.481831	0.276651	0.420282	0.144269	0.305897	0.41911	0.279158	0.211255	0.171864	0.493416	0.426912	-0.137347	0.217699	0.323273	0.53472	0.689262	0.470782	0.282013	0.484967	0.677015	0.470541	-0.0482184	0.431684	0.457575	0.558278	0.573805	-0.115182	0.526298	0.408673	0.571262	0.363653	0.444859	0.310894
TCGA-VP-A879-01A	0.526658	0.164651	0.657266	0.296978	0.357852	0.203189	0.429396	0.226569	0.513761	0.247976	0.223484	0.456796	0.248134	0.374524	0.367982	0.346795	0.479804	0.24582	0.39357	0.162856	0.298253	0.388793	0.232006	0.139197	0.0886446	0.408678	0.324758	-0.123345	0.150971	0.325686	0.500586	0.678714	0.425925	0.314351	0.437068	0.671423	0.434155	0.0148819	0.430174	0.440947	0.567773	0.533905	-0.113708	0.507966	0.323578	0.554152	0.357377	0.403759	0.323099
TCGA-VP-A87B-01A	0.49413	0.173869	0.643655	0.29408	0.307871	0.115879	0.396246	0.22056	0.519299	0.21926	0.212182	0.481478	0.315124	0.319	0.34618	0.328955	0.462801	0.299356	0.384783	0.136769	0.295551	0.323494	0.219741	0.111637	0.0816372	0.374183	0.309605	-0.170826	0.129051	0.323459	0.518639	0.68366	0.511985	0.229785	0.415906	0.662165	0.426795	-0.0457654	0.4255	0.45651	0.522841	0.543716	-0.0977285	0.465146	0.278463	0.55058	0.325291	0.386206	0.28559
TCGA-VP-A87C-01A	0.49208	0.459239	0.649202	0.344331	0.365385	0.219147	0.540384	0.198837	0.494506	0.305679	0.378112	0.465114	0.318759	0.447784	0.364145	0.352643	0.452053	0.323333	0.390862	0.156211	0.303888	0.417081	0.377439	0.406101	0.286354	0.651404	0.585341	-0.137155	0.303247	0.347785	0.540897	0.693896	0.425279	0.272773	0.437092	0.644007	0.50987	-0.00893056	0.418376	0.472243	0.56502	0.556856	-0.133141	0.563885	0.517847	0.560577	0.374973	0.463868	0.291766
TCGA-VP-A87D-01A	0.486723	0.145107	0.661462	0.262097	0.289228	0.126375	0.378624	0.204657	0.485164	0.155855	0.16815	0.470685	0.310495	0.268356	0.303561	0.273117	0.456798	0.31782	0.368325	0.186019	0.297761	0.320834	0.208951	0.101805	0.0461372	0.391578	0.304275	-0.150947	0.112191	0.349165	0.520513	0.713319	0.461451	0.184488	0.441649	0.670586	0.388306	0.018438	0.426442	0.463742	0.585287	0.519699	-0.0969952	0.466232	0.240547	0.569612	0.322301	0.367382	0.263259
TCGA-VP-A87E-01A	0.531131	0.348433	0.667784	0.346123	0.373919	0.226907	0.525389	0.214256	0.530299	0.325193	0.351677	0.453893	0.244224	0.459496	0.404667	0.370256	0.497887	0.247899	0.413791	0.148405	0.31328	0.473266	0.343658	0.32445	0.252386	0.557467	0.5207	-0.110706	0.273191	0.312544	0.543542	0.673426	0.444145	0.564698	0.425876	0.673667	0.502016	-0.097831	0.425143	0.467855	0.54943	0.572345	-0.145426	0.535301	0.545895	0.562753	0.374024	0.472104	0.238665
TCGA-VP-A87H-01A	0.518312	0.20044	0.661297	0.312109	0.314135	0.172252	0.46485	0.248222	0.535529	0.245191	0.253637	0.494498	0.355771	0.339968	0.367962	0.361926	0.498365	0.337144	0.410815	0.136835	0.299876	0.386306	0.252385	0.184022	0.135717	0.471451	0.389466	-0.1603	0.166432	0.336579	0.53911	0.709028	0.545317	0.237967	0.413666	0.674183	0.480023	-0.0633853	0.446337	0.463444	0.526519	0.548495	-0.109514	0.515162	0.416629	0.558308	0.320755	0.44086	0.307231
TCGA-VP-A87J-01A	0.498242	0.172343	0.684853	0.319712	0.282711	0.118941	0.441788	0.233686	0.525106	0.206933	0.223846	0.474122	0.30462	0.323525	0.339494	0.322002	0.468942	0.300707	0.414781	0.189877	0.304957	0.379959	0.247085	0.160776	0.109121	0.498556	0.385845	-0.180504	0.177845	0.334446	0.553591	0.705221	0.463506	0.197489	0.323345	0.680567	0.443443	-0.0335691	0.42649	0.465904	0.607244	0.524733	-0.0916058	0.515738	0.37757	0.584332	0.315389	0.42621	0.199567
TCGA-VP-A87K-01A	0.48066	0.199591	0.661235	0.249706	0.280341	0.107639	0.36522	0.193154	0.494903	0.160086	0.183311	0.494231	0.319138	0.241377	0.301772	0.287533	0.4665	0.309111	0.365883	0.167618	0.276804	0.294546	0.214689	0.133476	0.0629342	0.466884	0.354499	-0.150875	0.120282	0.337363	0.523122	0.727625	0.519511	0.163922	0.419164	0.673732	0.388632	0.021796	0.418106	0.456536	0.552747	0.517851	-0.111313	0.457637	0.251311	0.567273	0.283932	0.403012	0.280389
TCGA-VP-AA1N-01A	0.537325	0.266207	0.642106	0.304734	0.322737	0.171072	0.471259	0.238404	0.579622	0.247969	0.268938	0.496368	0.334918	0.385964	0.371012	0.370533	0.506972	0.312464	0.41951	0.077037	0.303183	0.414176	0.283523	0.212565	0.190111	0.473958	0.420409	-0.137162	0.201283	0.296621	0.561256	0.706264	0.477927	0.320122	0.448744	0.705622	0.468789	-0.087002	0.439227	0.452005	0.554765	0.586056	-0.0977009	0.496718	0.45627	0.554828	0.339544	0.44876	0.246956
TCGA-WW-A8ZI-01A	0.503782	0.168294	0.652789	0.290625	0.293485	0.114423	0.387699	0.230018	0.453649	0.147922	0.18177	0.47841	0.305527	0.265903	0.296052	0.262476	0.469586	0.30241	0.382866	0.155934	0.279285	0.341245	0.225475	0.143186	0.0839357	0.45358	0.348776	-0.190741	0.15987	0.326869	0.509108	0.701045	0.46191	0.183517	0.397096	0.674708	0.407019	-0.0509859	0.422603	0.465957	0.570602	0.518733	-0.10536	0.476924	0.267604	0.553747	0.326239	0.382582	0.262371
TCGA-X4-A8KQ-01A	0.503617	0.267264	0.612896	0.356329	0.33536	0.174621	0.484127	0.184755	0.498231	0.29332	0.301382	0.491719	0.296857	0.425289	0.342653	0.339323	0.457658	0.286249	0.40126	0.118787	0.293633	0.416191	0.29681	0.240799	0.196048	0.497391	0.423682	-0.14978	0.22944	0.282604	0.511904	0.705808	0.478271	0.27983	0.448201	0.685044	0.477654	-0.0139413	0.41299	0.455751	0.511269	0.575918	-0.112903	0.533171	0.46593	0.530111	0.324271	0.45579	0.298188
TCGA-X4-A8KS-01A	0.508513	0.242038	0.608895	0.261244	0.315591	0.238476	0.451217	0.223286	0.508027	0.271297	0.285174	0.499844	0.27791	0.321467	0.332358	0.354022	0.482557	0.255415	0.398151	0.0824643	0.282944	0.383499	0.274835	0.189945	0.117428	0.508968	0.425449	-0.111227	0.197677	0.258423	0.509282	0.683623	0.461969	0.273941	0.407166	0.688122	0.466893	-0.0385559	0.434826	0.451932	0.524846	0.556698	-0.109227	0.467066	0.359897	0.530319	0.308977	0.442458	0.276549
TCGA-XA-A8JR-01A	0.526289	0.218841	0.673427	0.259334	0.323381	0.181093	0.471561	0.202278	0.527987	0.24154	0.261338	0.474715	0.269919	0.346223	0.359811	0.354063	0.501178	0.259063	0.417896	0.110751	0.300047	0.407754	0.258663	0.209411	0.147701	0.605229	0.468541	-0.126173	0.182407	0.290524	0.532961	0.696442	0.47681	0.335717	0.402864	0.691499	0.466407	-0.076378	0.425868	0.461502	0.570198	0.55817	-0.119849	0.477998	0.410891	0.584831	0.335644	0.443609	0.2446
TCGA-XJ-A83F-01A	0.509233	0.170082	0.631843	0.27954	0.297557	0.113383	0.409763	0.215074	0.484122	0.250296	0.221412	0.50956	0.319736	0.310585	0.312124	0.321854	0.49463	0.296093	0.39386	0.113464	0.287028	0.351256	0.225537	0.1114	0.06388	0.390329	0.304012	-0.148739	0.161734	0.307277	0.52545	0.715427	0.506404	0.24299	0.405976	0.696514	0.408186	0.00418114	0.435056	0.447978	0.535679	0.547064	-0.0742906	0.46729	0.284374	0.564582	0.288882	0.405795	0.302761
TCGA-XJ-A83G-01A	0.52024	0.172749	0.671518	0.231819	0.29159	0.154376	0.391616	0.251926	0.548631	0.202145	0.206952	0.507335	0.330102	0.270996	0.355241	0.353232	0.501173	0.299191	0.403848	0.0772656	0.298248	0.34259	0.213918	0.108644	0.0718375	0.415593	0.344561	-0.136099	0.127428	0.29973	0.544885	0.704409	0.512138	0.215705	0.40945	0.708315	0.432813	-0.0884853	0.469156	0.45939	0.542715	0.560305	-0.107058	0.432308	0.29783	0.570174	0.273531	0.418274	0.226863
TCGA-XJ-A83H-01A	0.527175	0.202496	0.701768	0.291513	0.315859	0.194811	0.490323	0.212141	0.558642	0.235894	0.250121	0.471676	0.308702	0.341249	0.400774	0.381705	0.476527	0.300283	0.426716	0.15249	0.303966	0.43743	0.262793	0.202144	0.186443	0.441288	0.386359	-0.117455	0.194686	0.320925	0.552045	0.696548	0.491308	0.225845	0.445534	0.674282	0.499491	-0.0788975	0.436303	0.456143	0.563863	0.556039	-0.0984493	0.53069	0.501689	0.590382	0.343593	0.436572	0.298523
TCGA-XJ-A9DI-01A	0.508391	0.328721	0.606009	0.388439	0.379915	0.230752	0.503295	0.184852	0.463615	0.277173	0.31878	0.481016	0.295922	0.418637	0.363637	0.357063	0.439866	0.27637	0.399292	0.159456	0.303124	0.419938	0.300896	0.269648	0.210486	0.589469	0.502312	-0.123558	0.262115	0.332569	0.504217	0.691098	0.423573	0.27743	0.476609	0.651224	0.499856	-0.0545758	0.397367	0.456465	0.550864	0.539586	-0.133239	0.562728	0.428655	0.549564	0.369929	0.456186	0.350223
TCGA-XJ-A9DK-01A	0.53174	0.205232	0.657363	0.327931	0.351598	0.224939	0.443513	0.244858	0.543058	0.244282	0.240195	0.491792	0.30927	0.373095	0.35242	0.362116	0.503648	0.28181	0.412967	0.133803	0.302209	0.409196	0.254033	0.128142	0.111403	0.464455	0.372466	-0.117267	0.184385	0.319537	0.539028	0.708655	0.486536	0.284932	0.412234	0.693616	0.461652	-0.0196438	0.463709	0.453012	0.574689	0.565457	-0.107131	0.521196	0.343809	0.55884	0.34359	0.431873	0.279715
TCGA-XJ-A9DQ-01A	0.535891	0.183372	0.647065	0.26748	0.334141	0.19628	0.418741	0.234916	0.528524	0.219805	0.217549	0.484056	0.275956	0.327721	0.338577	0.339418	0.490849	0.255612	0.395387	0.0968434	0.291503	0.382835	0.232672	0.114821	0.0769794	0.414426	0.324634	-0.113653	0.153289	0.298666	0.510978	0.689856	0.449757	0.291657	0.416548	0.687107	0.452197	0.00345686	0.440367	0.444633	0.542125	0.548338	-0.111381	0.485499	0.311186	0.543159	0.327693	0.417784	0.319806
TCGA-XJ-A9DX-01A	0.481614	0.161441	0.633659	0.293449	0.290487	0.146145	0.357518	0.177101	0.460284	0.168328	0.178851	0.483964	0.314503	0.268021	0.275941	0.269916	0.462373	0.296985	0.346994	0.129376	0.295992	0.315254	0.20829	0.0999037	0.0727232	0.404642	0.323693	-0.171062	0.118352	0.334484	0.492961	0.683632	0.439337	0.182145	0.420809	0.679481	0.417382	-0.0126911	0.403809	0.453198	0.515844	0.50894	-0.10487	0.493499	0.251642	0.551117	0.275185	0.403793	0.310018
TCGA-XK-AAIR-01A	0.533519	0.241324	0.658378	0.325595	0.345219	0.223449	0.427302	0.242561	0.473659	0.251056	0.251079	0.459951	0.275525	0.356024	0.376494	0.355997	0.475209	0.260707	0.396842	0.178543	0.303889	0.360979	0.250829	0.197468	0.115698	0.471018	0.397595	-0.139822	0.207427	0.326197	0.512448	0.687919	0.423967	0.254955	0.422757	0.685565	0.435144	-0.00660516	0.440445	0.457048	0.598162	0.538874	-0.120326	0.481343	0.31291	0.559846	0.366511	0.401735	0.276718
TCGA-XK-AAIV-01A	0.526459	0.379882	0.648691	0.335446	0.339195	0.151362	0.463868	0.228887	0.571495	0.308516	0.331291	0.487563	0.442631	0.417704	0.357163	0.361022	0.518496	0.40263	0.426692	0.0933826	0.313869	0.384919	0.329961	0.308832	0.213874	0.597492	0.522949	-0.183024	0.244059	0.36523	0.603811	0.738558	0.563885	0.230884	0.353384	0.688475	0.449804	-0.0918031	0.448942	0.493622	0.571161	0.59078	-0.114375	0.485855	0.377453	0.597481	0.317094	0.447904	0.21236
TCGA-XK-AAIW-01A	0.480687	0.234189	0.621215	0.256672	0.266348	0.113039	0.338341	0.178018	0.523711	0.142951	0.181083	0.543642	0.557353	0.209024	0.266828	0.281852	0.462052	0.520808	0.386116	0.102501	0.292046	0.295941	0.230807	0.133996	0.0806589	0.362736	0.321182	-0.220067	0.0957341	0.424411	0.608982	0.774236	0.616192	0.138501	0.36015	0.689713	0.369345	-0.0685663	0.417522	0.493106	0.559616	0.544709	-0.0252189	0.405513	0.234081	0.595803	0.258791	0.389982	0.249727
TCGA-XK-AAJ3-01A	0.520356	0.142843	0.658965	0.272041	0.317112	0.137927	0.39548	0.249787	0.538397	0.207597	0.195149	0.49044	0.322345	0.35798	0.315984	0.298428	0.507882	0.297282	0.394111	0.0873036	0.298749	0.318333	0.203865	0.107492	0.0634534	0.412045	0.318926	-0.191353	0.125397	0.314958	0.53269	0.6971	0.473484	0.223337	0.377522	0.694097	0.406325	-0.0729692	0.4464	0.450394	0.547167	0.531193	-0.0984196	0.450658	0.255867	0.552296	0.298355	0.39753	0.263203
TCGA-XK-AAJA-01A	0.479087	0.178939	0.636036	0.234445	0.300848	0.142992	0.426114	0.199384	0.537116	0.243207	0.232684	0.481531	0.315523	0.26659	0.342067	0.336412	0.456119	0.309455	0.385871	0.147407	0.305776	0.354033	0.234121	0.175355	0.0848964	0.423112	0.353174	-0.155992	0.144896	0.325972	0.514922	0.679274	0.449384	0.199729	0.382529	0.647896	0.450332	-0.0793168	0.429692	0.461689	0.537034	0.538098	-0.106429	0.475372	0.328959	0.552567	0.280579	0.417466	0.322693
TCGA-XK-AAJP-01A	0.494235	0.206938	0.690585	0.299882	0.294111	0.14923	0.375771	0.241367	0.524613	0.187722	0.205179	0.492877	0.379861	0.293838	0.32571	0.300855	0.474858	0.351134	0.377457	0.113916	0.298628	0.311167	0.211968	0.153914	0.103515	0.440568	0.373529	-0.184547	0.12956	0.358615	0.54062	0.704573	0.482182	0.164543	0.421763	0.679739	0.411495	-0.118736	0.433832	0.474525	0.55848	0.5415	-0.105608	0.445687	0.27868	0.565624	0.29328	0.399739	0.224597
TCGA-XK-AAJR-01A	0.535531	0.154814	0.679876	0.35147	0.342355	0.184425	0.399642	0.206468	0.525559	0.212056	0.21534	0.4796	0.334225	0.333828	0.353378	0.332835	0.484156	0.319095	0.403233	0.179659	0.307415	0.363953	0.219142	0.116195	0.0930427	0.410184	0.329694	-0.145084	0.146543	0.351939	0.533575	0.700474	0.457186	0.256945	0.460722	0.681788	0.417692	-0.0518759	0.436941	0.454358	0.574292	0.54536	-0.104909	0.493735	0.27418	0.563299	0.342928	0.395681	0.323682
TCGA-XK-AAJT-01A	0.535494	0.240865	0.62336	0.365239	0.362835	0.245561	0.466874	0.209288	0.531147	0.267403	0.272723	0.483893	0.279592	0.3931	0.371064	0.367994	0.484405	0.262832	0.411021	0.138963	0.297624	0.417008	0.259953	0.187902	0.148492	0.564497	0.446035	-0.111624	0.206792	0.300143	0.519229	0.696126	0.470788	0.338158	0.460038	0.694727	0.472917	-0.018537	0.424308	0.449192	0.530082	0.556429	-0.134819	0.500579	0.382356	0.555893	0.345157	0.441438	0.309373
TCGA-XK-AAJU-01A	0.525695	0.235788	0.634931	0.263294	0.353957	0.251671	0.442828	0.2188	0.504368	0.244612	0.265881	0.485586	0.280622	0.315335	0.376752	0.363065	0.485737	0.266738	0.409693	0.154563	0.307935	0.392182	0.243032	0.1666	0.128213	0.504851	0.430654	-0.118444	0.193843	0.30813	0.526095	0.694551	0.458033	0.291194	0.431295	0.682606	0.456976	0.00665142	0.443828	0.457018	0.568639	0.56398	-0.113766	0.476347	0.33133	0.562969	0.326642	0.441546	0.310843
TCGA-XK-AAK1-01A	0.51043	0.183426	0.647481	0.246115	0.269163	0.144722	0.38852	0.216569	0.521464	0.199241	0.202777	0.523428	0.317328	0.24055	0.320696	0.310051	0.495034	0.279696	0.396919	0.0906884	0.295988	0.320506	0.205675	0.145634	0.0700818	0.476389	0.366968	-0.157112	0.134623	0.287594	0.542011	0.71103	0.538618	0.180534	0.356725	0.71308	0.418811	-0.0954083	0.439237	0.454033	0.55363	0.557885	-0.107693	0.415314	0.286702	0.578108	0.253396	0.416777	0.208974
TCGA-XQ-A8TA-01A	0.45105	0.0616753	0.520961	0.233833	0.238045	0.0904804	0.307188	0.145573	0.513871	0.0699859	0.068993	0.541863	0.598781	0.1716	0.244957	0.266003	0.433397	0.545524	0.400041	0.146097	0.285516	0.312358	0.18061	0.0183684	-0.0157294	0.2474	0.180618	-0.188891	0.0540175	0.430098	0.588097	0.774107	0.588494	0.141481	0.284057	0.682176	0.37899	-0.0602151	0.390341	0.453125	0.53028	0.494347	-0.0295129	0.450635	0.159661	0.584868	0.22593	0.386828	0.252018
TCGA-XQ-A8TB-01A	0.502408	0.226952	0.657411	0.351052	0.333337	0.171412	0.467062	0.190698	0.505907	0.259529	0.248325	0.463821	0.305048	0.438613	0.346745	0.314722	0.465979	0.29659	0.400582	0.174746	0.296734	0.395013	0.268693	0.190696	0.172451	0.448594	0.37491	-0.167451	0.200626	0.349549	0.53734	0.720417	0.499109	0.255706	0.43079	0.67231	0.451152	-0.0418124	0.415557	0.460074	0.592566	0.532525	-0.114304	0.560833	0.424197	0.557823	0.365279	0.412242	0.310776
TCGA-Y6-A8TL-01A	0.527286	0.180011	0.68193	0.293215	0.322807	0.158339	0.444842	0.228611	0.543614	0.242913	0.224689	0.482093	0.29448	0.355481	0.352844	0.33708	0.498142	0.281632	0.413882	0.128492	0.305409	0.388967	0.239161	0.156821	0.0952152	0.442462	0.357625	-0.174	0.159945	0.310813	0.542894	0.701607	0.500066	0.276004	0.431024	0.689642	0.433501	-0.0609333	0.435677	0.456221	0.569347	0.560556	-0.119103	0.476897	0.337942	0.576847	0.336687	0.419655	0.244876
TCGA-Y6-A9XI-01A	0.503801	0.149138	0.667863	0.280992	0.283992	0.139042	0.394911	0.188343	0.517863	0.166813	0.189694	0.492827	0.309117	0.241792	0.327772	0.303961	0.463873	0.291659	0.379652	0.120664	0.302704	0.33706	0.211239	0.122983	0.0774003	0.420828	0.31933	-0.156588	0.125825	0.330847	0.526654	0.695858	0.469119	0.177804	0.427889	0.672876	0.421635	-0.0952152	0.426813	0.4627	0.580606	0.521859	-0.113526	0.456441	0.288512	0.572552	0.299081	0.380961	0.251989
TCGA-YJ-A8SW-01A	0.496489	0.138832	0.717005	0.242734	0.297106	0.135618	0.383523	0.205897	0.540771	0.166055	0.195294	0.474224	0.36953	0.289865	0.3467	0.321516	0.470774	0.373893	0.389856	0.117118	0.306666	0.350162	0.224318	0.116751	0.0819847	0.405341	0.321032	-0.174944	0.121894	0.371149	0.553139	0.707358	0.48936	0.200953	0.402764	0.668049	0.415058	-0.0524019	0.423197	0.455061	0.578944	0.532526	-0.0576495	0.480884	0.283229	0.576705	0.33159	0.392166	0.212008
TCGA-YL-A8HJ-01A	0.526919	0.288085	0.648716	0.395545	0.387264	0.195255	0.460666	0.19695	0.470122	0.307366	0.293742	0.451954	0.289348	0.480806	0.327987	0.324483	0.464046	0.289408	0.386118	0.135515	0.300146	0.415622	0.307845	0.242063	0.163207	0.482281	0.413882	-0.125306	0.241665	0.351079	0.509689	0.693691	0.442279	0.500672	0.463438	0.660054	0.459579	-0.0239339	0.408352	0.459704	0.561346	0.56919	-0.120946	0.548147	0.384128	0.542003	0.413252	0.423024	0.332721
TCGA-YL-A8HK-01A	0.520018	0.245847	0.669941	0.401002	0.362544	0.185913	0.475888	0.192792	0.532433	0.290775	0.280029	0.459721	0.31171	0.444466	0.362175	0.362942	0.465741	0.308252	0.430849	0.200315	0.303958	0.430716	0.28159	0.234937	0.166985	0.456422	0.400245	-0.133936	0.23844	0.351838	0.542665	0.702158	0.46908	0.280747	0.458031	0.668761	0.455919	-0.02205	0.418438	0.452652	0.575492	0.563229	-0.125675	0.558985	0.432311	0.572605	0.378656	0.439058	0.343034
TCGA-YL-A8HL-01A	0.503636	0.146728	0.674604	0.333762	0.299762	0.126778	0.39359	0.227476	0.572733	0.173683	0.170877	0.472606	0.304423	0.281001	0.312398	0.288619	0.480649	0.301376	0.388235	0.160723	0.3007	0.345545	0.214524	0.112886	0.0700623	0.41044	0.306831	-0.140861	0.118194	0.352011	0.542138	0.702723	0.436494	0.169677	0.41474	0.671419	0.409251	0.00595712	0.43879	0.455015	0.594232	0.545297	-0.101702	0.506455	0.305831	0.571378	0.308902	0.40022	0.261133
TCGA-YL-A8HM-01A	0.514574	0.306896	0.674687	0.216753	0.277011	0.102252	0.387895	0.267792	0.534575	0.186759	0.251782	0.519119	0.445809	0.268428	0.309156	0.298303	0.525317	0.391801	0.381349	0.0546667	0.309636	0.291666	0.25325	0.205003	0.105111	0.573414	0.466865	-0.182342	0.143698	0.336438	0.586042	0.745037	0.544139	0.165093	0.33437	0.715849	0.404663	-0.125748	0.446355	0.480338	0.554663	0.574212	-0.087839	0.403149	0.260903	0.569528	0.266487	0.406802	0.183666
TCGA-YL-A8HO-01A	0.54849	0.313467	0.640124	0.419435	0.366116	0.220816	0.462529	0.247585	0.539804	0.254238	0.278128	0.480818	0.341193	0.41766	0.338016	0.35402	0.491376	0.311885	0.40242	0.120582	0.303891	0.40751	0.305012	0.244461	0.178727	0.470944	0.424266	-0.141541	0.22168	0.325087	0.53597	0.698158	0.469412	0.304198	0.464652	0.685028	0.461686	-0.0926439	0.442668	0.459019	0.539302	0.568099	-0.111722	0.511349	0.37378	0.539683	0.364868	0.424656	0.28801
TCGA-YL-A8S8-01A	0.514533	0.190056	0.668083	0.342864	0.327469	0.120713	0.444906	0.20477	0.533138	0.231693	0.246548	0.484275	0.371116	0.382673	0.35754	0.352857	0.494705	0.346769	0.40352	0.163648	0.30902	0.375158	0.242351	0.14781	0.131001	0.529604	0.422598	-0.159048	0.167335	0.350584	0.546615	0.708653	0.499153	0.302768	0.434944	0.673192	0.465916	-0.0973244	0.429449	0.450128	0.532397	0.531727	-0.104218	0.510121	0.386037	0.577015	0.340261	0.429062	0.29189
TCGA-YL-A8S9-01A	0.50397	0.0667413	0.675455	0.185997	0.240404	0.0842453	0.329477	0.208253	0.490557	0.0976897	0.120404	0.494901	0.379436	0.172928	0.319597	0.296337	0.472632	0.350744	0.372105	0.0885086	0.296783	0.29003	0.19896	0.0526353	0.0307383	0.297827	0.228346	-0.154892	0.0576405	0.346866	0.548751	0.722335	0.517604	0.130267	0.407448	0.697559	0.369371	-0.0875048	0.42148	0.473184	0.583988	0.520495	-0.109278	0.424515	0.218658	0.57277	0.295295	0.362602	0.245366
TCGA-YL-A8SA-01A	0.499298	0.174469	0.641604	0.285286	0.274639	0.129037	0.405483	0.204406	0.549627	0.221211	0.215087	0.470556	0.281343	0.242657	0.314929	0.314194	0.471456	0.277255	0.389208	0.151583	0.307621	0.342753	0.233106	0.169354	0.0933377	0.510311	0.381524	-0.141586	0.148914	0.334748	0.544677	0.684684	0.428875	0.165625	0.398264	0.663077	0.430416	0.0152667	0.440501	0.467174	0.584957	0.532897	-0.0943319	0.45476	0.323718	0.587358	0.280019	0.416584	0.262488
TCGA-YL-A8SB-01A	0.522556	0.213156	0.679716	0.368212	0.351625	0.176848	0.449492	0.221663	0.52738	0.255861	0.237179	0.469961	0.31779	0.42169	0.339821	0.329724	0.487962	0.302987	0.40878	0.138241	0.308472	0.402671	0.241259	0.174576	0.113705	0.423463	0.366558	-0.161269	0.19759	0.329351	0.535159	0.705632	0.4233	0.27821	0.440276	0.670535	0.438578	-0.0863349	0.428865	0.46058	0.574798	0.553757	-0.0922764	0.507234	0.316789	0.558783	0.38545	0.397318	0.290621
TCGA-YL-A8SC-01A	0.482961	0.259534	0.662634	0.314402	0.310574	0.123907	0.428635	0.197081	0.500725	0.197904	0.258605	0.485024	0.353748	0.315613	0.311546	0.281911	0.458824	0.352993	0.374739	0.169219	0.299076	0.34274	0.258857	0.215138	0.157499	0.641691	0.488133	-0.168931	0.194437	0.361267	0.544341	0.715566	0.470214	0.184425	0.33641	0.677597	0.418442	-0.0831289	0.422239	0.475298	0.586203	0.539743	-0.0895205	0.484314	0.336332	0.582619	0.309339	0.417157	0.222981
TCGA-YL-A8SI-01A	0.530384	0.211868	0.681883	0.34344	0.346616	0.192675	0.470432	0.224964	0.539652	0.26915	0.261113	0.477154	0.279444	0.407308	0.360658	0.349755	0.506041	0.268352	0.415609	0.122311	0.31036	0.41876	0.271423	0.203755	0.149542	0.425538	0.371588	-0.149389	0.202938	0.315576	0.542574	0.694916	0.445809	0.368705	0.417356	0.690549	0.46519	-0.124275	0.430771	0.462925	0.565363	0.569397	-0.113472	0.509352	0.391709	0.562709	0.370385	0.427392	0.266057
TCGA-YL-A9WH-01A	0.507085	0.185256	0.619833	0.29719	0.287599	0.107568	0.413901	0.214717	0.545161	0.215014	0.226088	0.497277	0.42869	0.348154	0.352873	0.340515	0.485973	0.386656	0.428955	0.115093	0.298694	0.370982	0.234009	0.136425	0.0901415	0.513306	0.400264	-0.169288	0.163397	0.3632	0.595929	0.737383	0.559354	0.202692	0.35051	0.689769	0.409073	-0.122215	0.437822	0.459179	0.56077	0.543183	-0.0822807	0.451279	0.288348	0.584412	0.276137	0.44138	0.225611
TCGA-YL-A9WI-01A	0.484479	0.183058	0.653036	0.239905	0.276454	0.0859667	0.404647	0.233809	0.537065	0.199424	0.2191	0.509273	0.422086	0.27988	0.338288	0.313584	0.492262	0.394485	0.400982	0.101026	0.306418	0.318344	0.223879	0.116848	0.0600417	0.530638	0.406424	-0.176594	0.111834	0.338652	0.565051	0.72197	0.535845	0.195275	0.355446	0.675281	0.4241	-0.0890979	0.442264	0.462038	0.555067	0.520379	-0.0691125	0.441491	0.245116	0.583349	0.298188	0.426475	0.212836
TCGA-YL-A9WJ-01A	0.532708	0.279703	0.674476	0.378648	0.354582	0.204472	0.491839	0.234475	0.55821	0.277449	0.296723	0.467949	0.300824	0.426875	0.390895	0.371047	0.503615	0.282753	0.419888	0.155851	0.297916	0.416786	0.290791	0.269766	0.203976	0.499353	0.450364	-0.148915	0.243482	0.33284	0.556635	0.696097	0.498529	0.268895	0.423744	0.677382	0.481691	-0.0450162	0.435093	0.462948	0.56566	0.565423	-0.137884	0.525814	0.470839	0.580776	0.362207	0.446236	0.290232
TCGA-YL-A9WK-01A	0.537525	0.231557	0.653168	0.36775	0.330172	0.162408	0.440441	0.22043	0.498974	0.249751	0.244199	0.501441	0.300928	0.401321	0.322881	0.307984	0.479563	0.285444	0.392402	0.154777	0.287096	0.395872	0.25868	0.199563	0.148948	0.459036	0.377492	-0.165356	0.185149	0.301046	0.534251	0.718221	0.511075	0.287151	0.400824	0.688724	0.431373	-0.0343861	0.426624	0.446329	0.551553	0.529492	-0.123957	0.514305	0.384104	0.562064	0.362847	0.440302	0.278925
TCGA-YL-A9WL-01A	0.486717	0.160329	0.608989	0.370025	0.281478	0.0960699	0.354167	0.191093	0.476906	0.165925	0.167963	0.493768	0.350126	0.297158	0.294668	0.289452	0.454491	0.337153	0.375774	0.14854	0.288957	0.336338	0.223713	0.131591	0.0692446	0.400732	0.301657	-0.155483	0.12401	0.358155	0.537345	0.731126	0.520942	0.174477	0.379516	0.685521	0.386214	-0.0342718	0.42424	0.463751	0.554947	0.52897	-0.0944194	0.459555	0.251686	0.561362	0.272908	0.394001	0.287998
TCGA-YL-A9WX-01A	0.508025	0.276658	0.681131	0.34222	0.365746	0.21992	0.505113	0.216159	0.516604	0.303874	0.317189	0.455989	0.269505	0.402906	0.39329	0.373681	0.456575	0.269134	0.416762	0.167121	0.303375	0.434445	0.295137	0.266786	0.196563	0.515223	0.450732	-0.118103	0.243166	0.323383	0.528029	0.684613	0.434811	0.263452	0.474862	0.648789	0.477976	-0.0624086	0.432054	0.454939	0.576165	0.557249	-0.126247	0.55395	0.480571	0.5815	0.382418	0.436044	0.318905
TCGA-YL-A9WY-01A	0.518187	0.347886	0.64446	0.393004	0.362984	0.163079	0.467958	0.209146	0.535744	0.285755	0.320292	0.493991	0.380726	0.444089	0.336603	0.339848	0.471322	0.352979	0.404061	0.101067	0.300747	0.390273	0.307695	0.257741	0.181488	0.568528	0.494188	-0.16788	0.244077	0.356646	0.576797	0.728403	0.469791	0.274579	0.416146	0.682435	0.453791	-0.101135	0.420981	0.482421	0.570234	0.588586	-0.120416	0.524826	0.374337	0.567515	0.349814	0.43667	0.277715
TCGA-ZG-A8QW-01A	0.535019	0.280558	0.64007	0.344285	0.334682	0.179933	0.488641	0.246597	0.535701	0.294958	0.290289	0.498195	0.365187	0.39113	0.355198	0.369773	0.508188	0.333031	0.450507	0.0894984	0.294043	0.423091	0.277205	0.239777	0.158345	0.538018	0.448852	-0.172365	0.214403	0.327511	0.567573	0.720302	0.510045	0.270475	0.413515	0.703326	0.493475	-0.0435135	0.462772	0.457987	0.541553	0.575772	-0.0808352	0.501937	0.420828	0.577348	0.321009	0.46785	0.252192
TCGA-ZG-A8QX-01A	0.534399	0.205274	0.674759	0.25329	0.309601	0.16167	0.442923	0.215496	0.54215	0.211991	0.214702	0.47804	0.303927	0.33026	0.33343	0.323059	0.517627	0.286614	0.402729	0.0991387	0.309063	0.399433	0.261884	0.198503	0.0919876	0.417327	0.355193	-0.139527	0.161088	0.310468	0.544899	0.699474	0.471032	0.554678	0.391431	0.713053	0.456588	-0.117179	0.431203	0.46553	0.563492	0.567835	-0.106597	0.477044	0.381704	0.557413	0.326547	0.425059	0.207347
TCGA-ZG-A8QY-01A	0.528707	0.15111	0.677944	0.361528	0.340958	0.176314	0.421816	0.240802	0.527967	0.204842	0.189071	0.49139	0.352336	0.398236	0.346733	0.323879	0.496785	0.312905	0.409754	0.168386	0.302527	0.393677	0.231074	0.132725	0.099464	0.424928	0.334167	-0.167333	0.144815	0.351405	0.54189	0.707316	0.466918	0.287368	0.432287	0.70226	0.449629	-0.0754485	0.44416	0.467441	0.571041	0.551359	-0.112366	0.52347	0.341746	0.56131	0.376316	0.415747	0.259838
TCGA-ZG-A8QZ-01A	0.518903	0.282002	0.645404	0.347569	0.348177	0.200799	0.493536	0.2077	0.496386	0.275521	0.279831	0.488623	0.306447	0.425021	0.359722	0.358358	0.481719	0.279583	0.421305	0.191656	0.293903	0.421125	0.293605	0.244014	0.178039	0.516992	0.441071	-0.144393	0.237995	0.322394	0.536983	0.712325	0.45783	0.271272	0.445716	0.685774	0.480911	0.0241701	0.431547	0.458393	0.575667	0.550676	-0.121308	0.548252	0.447797	0.570945	0.35976	0.438616	0.312501
TCGA-ZG-A9KY-01A	0.478883	0.319818	0.654759	0.264323	0.291505	0.172576	0.424354	0.182123	0.485325	0.147731	0.241503	0.502995	0.477333	0.25583	0.291971	0.2695	0.469399	0.446622	0.342911	0.197687	0.308634	0.312167	0.259308	0.244991	0.137663	0.554722	0.458175	-0.202154	0.146429	0.395666	0.532488	0.74049	0.48374	0.17523	0.398616	0.665176	0.421431	-0.0221359	0.410967	0.480398	0.550191	0.535991	-0.0845456	0.474633	0.31013	0.556515	0.286794	0.426471	0.290227
TCGA-ZG-A9L0-01A	0.516914	0.31401	0.672893	0.428879	0.359916	0.18335	0.497259	0.220383	0.524024	0.311801	0.31796	0.493271	0.355742	0.482499	0.356202	0.356608	0.463801	0.33136	0.416266	0.11762	0.316134	0.411702	0.309565	0.294068	0.225699	0.593196	0.501618	-0.144227	0.26006	0.315717	0.560304	0.718728	0.471215	0.248344	0.417848	0.675382	0.481248	-0.0759742	0.419322	0.472147	0.574262	0.563046	-0.106171	0.535025	0.463332	0.584418	0.370092	0.453121	0.250328
TCGA-ZG-A9L1-01A	0.484813	0.103748	0.636446	0.334621	0.318357	0.160053	0.439051	0.186886	0.50378	0.187746	0.186297	0.492014	0.355154	0.382462	0.310999	0.25604	0.453513	0.348954	0.379825	0.16462	0.305566	0.395887	0.233189	0.103362	0.0971479	0.319144	0.263473	-0.156379	0.118907	0.356375	0.516355	0.71013	0.41498	0.428158	0.433584	0.659942	0.426422	-0.0280728	0.403962	0.449973	0.546098	0.535702	-0.0943274	0.525376	0.352556	0.531051	0.363108	0.394896	0.298568
TCGA-ZG-A9L2-01A	0.528211	0.321479	0.629139	0.374076	0.376255	0.190937	0.487283	0.220629	0.535578	0.289758	0.282065	0.483515	0.357179	0.499346	0.337947	0.335759	0.480754	0.341805	0.42594	0.18288	0.295472	0.427186	0.340517	0.279999	0.189345	0.497939	0.430941	-0.173514	0.234829	0.347655	0.560333	0.714774	0.472689	0.389179	0.442122	0.677619	0.471377	-0.0679428	0.413981	0.469684	0.55533	0.57128	-0.0971589	0.551923	0.411603	0.57205	0.380569	0.448477	0.264634
TCGA-ZG-A9L4-01A	0.522785	0.246569	0.631536	0.453884	0.346192	0.208538	0.509144	0.209597	0.498935	0.290983	0.28817	0.482838	0.333754	0.475145	0.349302	0.336636	0.473132	0.313007	0.420062	0.18638	0.304077	0.442829	0.306334	0.220836	0.200759	0.487254	0.413153	-0.151251	0.240434	0.340276	0.540848	0.718648	0.474815	0.267614	0.462559	0.690374	0.4973	-0.0265701	0.443079	0.457933	0.576267	0.565091	-0.112421	0.567443	0.500842	0.559561	0.379144	0.443799	0.32514
TCGA-ZG-A9L5-01A	0.468818	0.158521	0.652355	0.326407	0.283762	0.0892213	0.38382	0.220329	0.555083	0.144757	0.181795	0.481294	0.390634	0.313754	0.268438	0.252593	0.464831	0.372052	0.378165	0.116744	0.289301	0.34154	0.197415	0.116756	0.071291	0.382347	0.303813	-0.193596	0.125916	0.357837	0.531327	0.712572	0.454101	0.18003	0.334348	0.662183	0.406938	-0.0154807	0.414015	0.432324	0.573628	0.502055	-0.0840838	0.505578	0.303353	0.576972	0.326625	0.370215	0.225718
TCGA-ZG-A9L6-01A	0.534155	0.241424	0.666365	0.418313	0.375553	0.226712	0.474813	0.230169	0.526593	0.257715	0.263796	0.467922	0.268907	0.418287	0.348639	0.344709	0.493166	0.266232	0.413569	0.176341	0.302762	0.427431	0.26668	0.212437	0.141719	0.471246	0.394517	-0.150709	0.213622	0.325503	0.528665	0.685211	0.416698	0.313283	0.465497	0.680656	0.467869	-0.0542558	0.431338	0.450362	0.560832	0.551502	-0.124173	0.541097	0.36758	0.552618	0.393933	0.42112	0.334281
TCGA-ZG-A9L9-01A	0.512134	0.303593	0.567366	0.408001	0.332004	0.140268	0.47734	0.182222	0.539041	0.258292	0.28117	0.511469	0.382053	0.45764	0.329994	0.33743	0.463944	0.366237	0.410988	0.126697	0.299858	0.420491	0.309425	0.26289	0.200107	0.535825	0.447713	-0.194969	0.212967	0.332489	0.555545	0.727725	0.503871	0.320902	0.412907	0.69827	0.465779	-0.0812883	0.407811	0.464409	0.514582	0.579102	-0.0757953	0.508056	0.422228	0.577773	0.33335	0.459106	0.230583
TCGA-ZG-A9LB-01A	0.52892	0.269404	0.632227	0.348808	0.319383	0.185058	0.508502	0.193005	0.5382	0.28721	0.294977	0.525117	0.402996	0.40206	0.357701	0.380475	0.493963	0.368648	0.446489	0.170642	0.29124	0.46113	0.307017	0.270111	0.220442	0.465576	0.43295	-0.124402	0.247332	0.303295	0.566257	0.741076	0.549283	0.293726	0.407799	0.714485	0.491321	0.0199733	0.434762	0.451467	0.516747	0.589098	-0.0960203	0.521761	0.520195	0.564257	0.338728	0.476001	0.253377
TCGA-ZG-A9LM-01A	0.50803	0.242043	0.631306	0.303462	0.307058	0.158478	0.455951	0.219854	0.516832	0.242675	0.25469	0.490092	0.30546	0.388969	0.331886	0.34712	0.483092	0.283793	0.401573	0.0615726	0.299204	0.385987	0.255453	0.194138	0.12082	0.538797	0.438145	-0.148503	0.201401	0.25704	0.538172	0.709471	0.45727	0.231306	0.399604	0.695509	0.455726	-0.0820254	0.439242	0.438765	0.557818	0.550175	-0.0852175	0.519096	0.364008	0.550443	0.334601	0.425317	0.236035
TCGA-ZG-A9LN-01A	0.51961	0.419581	0.660223	0.376607	0.372728	0.224289	0.52612	0.217889	0.499487	0.296059	0.350255	0.494562	0.373003	0.438371	0.346805	0.348759	0.478822	0.34882	0.414683	0.110658	0.296368	0.421514	0.375086	0.368183	0.250861	0.632427	0.563543	-0.169223	0.274411	0.32383	0.550186	0.716809	0.453907	0.293223	0.406106	0.687328	0.501215	-0.064628	0.424386	0.488631	0.545358	0.585837	-0.0990844	0.52913	0.491888	0.552947	0.35888	0.463636	0.265385
TCGA-ZG-A9LS-01A	0.529375	0.35419	0.622642	0.376279	0.362017	0.205515	0.49875	0.210258	0.500683	0.281421	0.309786	0.492038	0.277534	0.457909	0.357636	0.342019	0.473143	0.267884	0.412769	0.131714	0.304689	0.41482	0.338528	0.321564	0.202348	0.553035	0.481812	-0.172184	0.249052	0.307419	0.534192	0.70038	0.456878	0.303737	0.406774	0.682347	0.483638	0.00489675	0.409722	0.466053	0.558737	0.584267	-0.126214	0.524046	0.405004	0.562839	0.369326	0.450876	0.267896
TCGA-ZG-A9LU-01A	0.51991	0.284206	0.58734	0.270799	0.334584	0.225409	0.489759	0.196981	0.516255	0.25765	0.29492	0.510866	0.340254	0.332807	0.373784	0.379912	0.47703	0.312663	0.41651	0.0798568	0.283856	0.416358	0.284785	0.260491	0.168386	0.615575	0.50079	-0.0938577	0.207313	0.303155	0.516311	0.708723	0.507765	0.292926	0.437374	0.697908	0.517612	-0.0432727	0.417872	0.44746	0.512754	0.576248	-0.107371	0.489904	0.431815	0.555941	0.300501	0.465994	0.306906
TCGA-ZG-A9LY-01A	0.522412	0.23369	0.616865	0.363297	0.34414	0.198958	0.469921	0.201515	0.476207	0.255642	0.274423	0.480989	0.290403	0.396493	0.362005	0.347629	0.476942	0.279836	0.406212	0.159391	0.313924	0.401228	0.254686	0.199693	0.149751	0.467345	0.402733	-0.140572	0.219408	0.32555	0.528402	0.706847	0.473586	0.271175	0.42067	0.685039	0.478212	-0.0453795	0.430911	0.460647	0.588574	0.544409	-0.127668	0.531483	0.380269	0.573224	0.351366	0.421789	0.284133
TCGA-ZG-A9LZ-01A	0.516126	0.282756	0.639211	0.319485	0.308037	0.135618	0.469833	0.208616	0.534361	0.265763	0.284491	0.495017	0.332945	0.34981	0.339527	0.335165	0.488804	0.31616	0.412233	0.113612	0.303145	0.385876	0.272442	0.225908	0.160386	0.573245	0.477445	-0.159237	0.202988	0.331315	0.559332	0.732058	0.526475	0.217211	0.385185	0.704923	0.462537	-0.0132454	0.437314	0.466188	0.574804	0.569464	-0.10283	0.511268	0.407454	0.572859	0.311002	0.430011	0.288756
TCGA-ZG-A9M4-01A	0.488848	0.321888	0.577594	0.250237	0.3254	0.198088	0.46134	0.178993	0.47116	0.197421	0.260696	0.478962	0.303028	0.313406	0.319204	0.297097	0.441208	0.286195	0.384931	0.131586	0.319917	0.37504	0.278404	0.253088	0.153279	0.529932	0.45716	-0.163845	0.197469	0.347716	0.534841	0.688176	0.411467	0.241532	0.396403	0.665073	0.448262	-0.0625603	0.404261	0.47291	0.573008	0.531581	-0.0841964	0.495533	0.373942	0.532377	0.340965	0.416145	0.233816
TCGA-ZG-A9MC-01A	0.493998	0.420648	0.57551	0.383858	0.404888	0.259239	0.539142	0.160788	0.47791	0.297454	0.363118	0.466856	0.291373	0.461213	0.378473	0.361798	0.42623	0.274441	0.391984	0.143154	0.30445	0.448998	0.378246	0.398856	0.302037	0.684874	0.58606	-0.096417	0.301911	0.33751	0.519019	0.690914	0.433795	0.384655	0.481731	0.639194	0.526395	-0.0571169	0.391851	0.471678	0.550646	0.557722	-0.166626	0.591107	0.549255	0.54436	0.38381	0.468202	0.333319
TCGA-ZG-A9N3-01A	0.497566	0.299971	0.585445	0.295683	0.291547	0.133361	0.476347	0.152632	0.510416	0.173521	0.27491	0.544563	0.539752	0.308802	0.34249	0.353937	0.430046	0.486609	0.401851	0.087119	0.309173	0.376972	0.305034	0.28016	0.153603	0.578828	0.468143	-0.1755	0.181818	0.377463	0.59406	0.753858	0.545583	0.244014	0.428743	0.701682	0.464033	-0.119745	0.404486	0.497959	0.541544	0.549864	-0.0491934	0.47585	0.417744	0.58504	0.274978	0.453126	0.230298
TCGA-ZG-A9ND-01A	0.50483	0.179046	0.69423	0.286745	0.283872	0.1414	0.434356	0.22959	0.538483	0.17381	0.194902	0.49656	0.354968	0.274769	0.341361	0.313928	0.484155	0.326243	0.413539	0.126521	0.299375	0.380184	0.227056	0.148146	0.11049	0.4088	0.354276	-0.147168	0.12979	0.31934	0.55816	0.704882	0.501957	0.177933	0.438467	0.690267	0.454533	-0.0720605	0.434736	0.466243	0.564565	0.539757	-0.0961244	0.471598	0.412681	0.589141	0.29562	0.41861	0.234747
TCGA-ZG-A9NI-01A	0.531087	0.192737	0.621954	0.369159	0.342273	0.187812	0.46078	0.217941	0.515373	0.23213	0.220416	0.514433	0.358331	0.43409	0.318882	0.314653	0.486477	0.329032	0.41406	0.120416	0.294685	0.397945	0.249939	0.150979	0.133377	0.447914	0.363596	-0.145901	0.1834	0.324916	0.525691	0.712904	0.490411	0.315443	0.429186	0.699217	0.457416	-0.0673101	0.44507	0.449382	0.535262	0.547206	-0.0990744	0.529829	0.37996	0.550882	0.344891	0.442003	0.281929
[truncated: 1 more columns]

## Sheet: corr_res
HALLMARK	Riskscore	MYLK	FBLN1	PTGDS	TGFB1	MXRA8	PTN	COL1A1	THBS2	MT1E
ADIPOGENESIS	-0.394697	0.686564	0.553744	0.521975	0.265306	0.234913	0.512838	0.103706	0.00363176	0.416327
ALLOGRAFT_REJECTION	0.263975	0.22848	0.440407	0.392225	0.624557	0.481596	0.183302	0.320662	0.402986	0.0340115
ANDROGEN_RESPONSE	-0.394195	0.217867	-0.0789864	-0.160194	-0.268304	-0.490183	0.166628	-0.129585	-0.0466446	0.14282
ANGIOGENESIS	0.373232	0.471268	0.537967	0.301973	0.737807	0.578702	0.142088	0.733015	0.703529	-0.0521566
APICAL_JUNCTION	0.037242	0.776715	0.734357	0.565576	0.702012	0.547355	0.37366	0.505172	0.470538	0.128863
APICAL_SURFACE	-0.222614	0.737826	0.677396	0.697172	0.506404	0.389876	0.471101	0.194897	0.140452	0.279489
APOPTOSIS	0.063811	0.527689	0.598304	0.453456	0.613506	0.450297	0.329364	0.358569	0.393289	0.154213
BILE_ACID_METABOLISM	-0.375606	0.20805	0.117198	0.191789	-0.0616269	-0.135952	0.359652	-0.141472	-0.156789	0.360221
CHOLESTEROL_HOMEOSTASIS	-0.261675	0.111019	-0.0445629	-0.0572454	-0.118319	-0.180994	0.240695	-0.103154	-0.10171	0.339215
COAGULATION	0.13905	0.472237	0.645343	0.57494	0.687823	0.616032	0.331346	0.36353	0.409399	0.185092
COMPLEMENT	0.146036	0.399781	0.541469	0.474014	0.646246	0.493942	0.292984	0.320917	0.40205	0.158306
DNA_REPAIR	0.213822	-0.5582	-0.323214	-0.136013	-0.129597	0.0736111	-0.241571	-0.16017	-0.255688	-0.00406752
E2F_TARGETS	0.430294	-0.508135	-0.496852	-0.528291	-0.131592	-0.126873	-0.456699	0.13035	0.170559	-0.317163
EPITHELIAL_MESENCHYMAL_TRANSITION	0.243742	0.662241	0.750584	0.488125	0.79149	0.702363	0.321455	0.712286	0.684191	0.062988
ESTROGEN_RESPONSE_EARLY	-0.265803	0.624109	0.467141	0.369456	0.308883	0.115048	0.353837	0.0857263	0.140517	0.28237
ESTROGEN_RESPONSE_LATE	-0.147592	0.534285	0.491379	0.507101	0.445837	0.309954	0.348485	0.100523	0.136516	0.314912
FATTY_ACID_METABOLISM	-0.501778	0.186965	0.131223	0.172349	-0.169715	-0.121831	0.400121	-0.230726	-0.282898	0.51403
G2M_CHECKPOINT	0.388892	-0.397617	-0.48167	-0.563218	-0.153723	-0.204705	-0.445626	0.17384	0.260612	-0.345117
GLYCOLYSIS	0.0184363	0.283872	0.371177	0.305884	0.43433	0.31438	0.307851	0.19361	0.18886	0.273213
HEDGEHOG_SIGNALING	0.106002	0.374684	0.26304	0.130479	0.347275	0.106849	0.0408733	0.347558	0.330541	-0.126625
HEME_METABOLISM	-0.211559	0.358257	0.163494	-0.0434937	0.0330825	-0.162744	0.233041	0.0776286	0.186239	0.1094
HYPOXIA	-0.0562356	0.630801	0.647847	0.522851	0.572581	0.446803	0.408358	0.317651	0.291383	0.242879
IL2_STAT5_SIGNALING	0.241564	0.37406	0.585067	0.456973	0.693713	0.559058	0.226804	0.410297	0.458858	0.0823919
IL6_JAK_STAT3_SIGNALING	0.196613	0.302036	0.496697	0.384151	0.60792	0.45884	0.22258	0.319058	0.385071	0.0980674
INFLAMMATORY_RESPONSE	0.230375	0.3856	0.524462	0.355321	0.669317	0.471637	0.220491	0.41539	0.472787	0.0777661
INTERFERON_ALPHA_RESPONSE	0.214857	0.125143	0.266713	0.233961	0.486587	0.366544	0.166553	0.253972	0.312943	0.111354
INTERFERON_GAMMA_RESPONSE	0.222406	0.222479	0.382212	0.303504	0.576643	0.42648	0.21541	0.311257	0.388221	0.112352
KRAS_SIGNALING_DN	-0.293272	0.439986	0.363824	0.502246	0.208223	0.138252	0.287656	-0.132048	-0.179246	0.20048
KRAS_SIGNALING_UP	0.179509	0.495661	0.633942	0.492445	0.709247	0.539419	0.296749	0.44066	0.520264	0.103987
MITOTIC_SPINDLE	0.298805	-0.0115814	-0.20512	-0.361759	0.03198	-0.157457	-0.331468	0.293573	0.398128	-0.365236
MTORC1_SIGNALING	0.0484282	-0.144914	-0.27637	-0.376073	-0.132069	-0.292257	-0.0530081	0.0499259	0.183071	0.0392273
MYC_TARGETS_V1	0.29527	-0.485373	-0.438075	-0.373488	-0.197019	-0.130064	-0.423018	-0.0279332	0.00855944	-0.278457
MYC_TARGETS_V2	0.169127	-0.592798	-0.409425	-0.301237	-0.24588	-0.116725	-0.347669	-0.208907	-0.204983	-0.0165738
MYOGENESIS	-0.204637	0.753576	0.788053	0.631059	0.483799	0.534699	0.519231	0.311081	0.184455	0.315295
NOTCH_SIGNALING	0.0317068	0.598728	0.555418	0.423145	0.528652	0.385794	0.24801	0.348274	0.319705	-0.00937603
OXIDATIVE_PHOSPHORYLATION	-0.139249	-0.230082	-0.139346	0.00649851	-0.200383	-0.0322535	0.0364176	-0.249724	-0.3602	0.225822
P53_PATHWAY	0.0409133	0.407626	0.520502	0.482843	0.574144	0.451269	0.310186	0.224273	0.203608	0.243821
PANCREAS_BETA_CELLS	0.0404734	0.126882	0.0513048	0.260519	0.151011	0.0660628	-0.0786932	-0.0374674	0.00308337	-0.176657
PEROXISOME	-0.303237	0.049147	-0.115042	0.0749816	-0.178502	-0.273299	0.140235	-0.246485	-0.197545	0.192165
PI3K_AKT_MTOR_SIGNALING	0.0849485	-0.0672277	-0.147555	-0.246188	-0.0485441	-0.194138	-0.075382	0.116611	0.23617	-0.069107
PROTEIN_SECRETION	-0.257629	0.244156	-0.0572908	-0.171772	-0.200177	-0.435162	0.0675332	-0.0441616	0.123959	-0.0725584
REACTIVE_OXYGEN_SPECIES_PATHWAY	-0.00749914	0.12741	0.307099	0.357667	0.357624	0.373227	0.30481	0.0370179	-0.0131454	0.344092
SPERMATOGENESIS	0.0462124	-0.441155	-0.530061	-0.408769	-0.411034	-0.344465	-0.269914	-0.184821	-0.127373	-0.122655
TGF_BETA_SIGNALING	0.188139	0.560192	0.485105	0.283885	0.574644	0.368586	0.129932	0.512331	0.567394	-0.107809
TNFA_SIGNALING_VIA_NFKB	0.0854246	0.379427	0.473172	0.341469	0.523588	0.360274	0.229498	0.269588	0.294277	0.125101
UNFOLDED_PROTEIN_RESPONSE	-0.0657304	-0.230283	-0.347619	-0.428149	-0.279963	-0.418344	-0.151797	-0.155073	-0.0577732	0.042012
UV_RESPONSE_DN	-0.0890701	0.774093	0.598618	0.365278	0.431119	0.253961	0.30662	0.439234	0.465771	0.0302179
UV_RESPONSE_UP	0.119814	0.179696	0.399365	0.383461	0.518245	0.489362	0.275744	0.168861	0.138448	0.280599
WNT_BETA_CATENIN_SIGNALING	0.137417	0.438617	0.368653	0.380839	0.487781	0.365497	0.0417702	0.293354	0.233388	-0.141003
XENOBIOTIC_METABOLISM	-0.28808	0.484472	0.566004	0.581657	0.365084	0.314363	0.525394	0.0204844	0.000344953	0.48766

## Sheet: pvalue_res
HALLMARK	Riskscore	MYLK	FBLN1	PTGDS	TGFB1	MXRA8	PTN	COL1A1	THBS2	MT1E
ADIPOGENESIS	2.8776e-07	6.2679e-18	1.5492e-14	2.6352e-17	0.0010044	0.0017091	1.0765e-25	0.6626	0.6478	1.2758e-12
ALLOGRAFT_REJECTION	0.018099	1.5539e-05	1.8675e-11	9.8421e-09	3.7908e-20	9.3973e-15	0.0011908	2.2459e-07	2.0363e-07	0.37484
ANDROGEN_RESPONSE	1.7271e-05	0.1002	0.31993	0.095487	0.0017087	4.568e-07	0.22579	0.042922	0.26454	0.34337
ANGIOGENESIS	0.0081467	2.4325e-11	1.2996e-14	2.259e-07	7.717e-25	1.3797e-14	0.0040746	4.5984e-20	1.7535e-17	0.52326
APICAL_JUNCTION	0.82721	1.6985e-26	1.6822e-30	4.7883e-17	9.1673e-19	4.3675e-12	3.6785e-09	3.8657e-08	1.0879e-06	0.052599
APICAL_SURFACE	0.042352	5.7232e-29	2.2776e-32	4.568e-28	3.31e-12	4.5768e-09	1.0496e-15	0.0015907	0.012161	9.4229e-05
APOPTOSIS	0.73185	3.0117e-14	1.1163e-20	1.1147e-13	4.0154e-19	8.1055e-12	1.3105e-07	1.1131e-06	2.8395e-06	0.036625
BILE_ACID_METABOLISM	1.3508e-15	0.0045023	0.16069	0.022161	0.056806	0.028753	4.2228e-08	0.00014157	4.2647e-05	1.5773e-11
CHOLESTEROL_HOMEOSTASIS	1.4372e-09	0.11677	0.99817	0.78939	0.011262	0.0011346	0.00032239	0.00026701	0.00063049	1.1378e-07
COAGULATION	0.64713	2.5078e-13	3.8583e-26	1.0119e-19	1.2049e-23	1.0062e-17	1.4748e-08	1.5117e-06	2.3072e-05	0.0093687
COMPLEMENT	0.38739	3.5327e-10	3.7598e-18	1.1015e-13	9.4086e-21	3.7465e-14	8.9173e-07	2.6277e-06	6.2268e-06	0.031954
DNA_REPAIR	0.05834	2.6598e-14	6.5726e-07	0.00051401	0.0010093	0.14642	4.5926e-05	0.0026198	0.00056435	0.38544
E2F_TARGETS	3.0497e-05	3.2846e-22	1.2694e-19	1.2029e-24	8.3707e-06	9.0947e-05	1.0768e-22	0.30098	0.74657	1.1942e-08
EPITHELIAL_MESENCHYMAL_TRANSITION	0.19285	5.6617e-17	1.1876e-25	3.3758e-13	2.3514e-28	1.1478e-17	3.1265e-06	1.8777e-13	5.4132e-11	0.31755
ESTROGEN_RESPONSE_EARLY	0.0027105	5.06e-23	1.2949e-15	1.0904e-12	1.1417e-06	0.00072208	2.0693e-13	0.036384	0.04873	5.1975e-05
ESTROGEN_RESPONSE_LATE	0.030286	4.7797e-17	6.0409e-20	3.3544e-20	6.128e-10	2.5588e-07	2.9351e-14	0.026918	0.07243	3.0585e-06
FATTY_ACID_METABOLISM	3.2475e-15	0.48564	0.95586	0.23811	0.00048767	0.0044653	2.4353e-05	1.1704e-08	6.4139e-11	3.6481e-14
G2M_CHECKPOINT	6.3594e-05	3.4019e-14	5.7266e-17	8.2864e-28	1.9016e-05	1.4811e-05	3.5241e-21	0.63683	0.62721	1.0085e-10
GLYCOLYSIS	0.13995	1.1215e-09	3.61e-13	9.1305e-13	8.9994e-09	5.386e-07	9.177e-11	0.032105	0.090299	2.3076e-06
HEDGEHOG_SIGNALING	0.5046	5.9999e-10	3.1132e-06	0.0025928	2.4626e-06	0.0051611	0.039271	2.7477e-07	4.7482e-08	0.17852
HEME_METABOLISM	0.0016942	2.3213e-07	0.003491	0.083836	0.26977	0.53528	0.00010964	0.34512	0.095962	0.048292
HYPOXIA	0.38246	8.8237e-21	6.129e-28	2.0819e-19	7.2971e-16	6.5254e-11	1.8169e-11	4.6498e-05	0.00038881	0.0014035
IL2_STAT5_SIGNALING	0.08051	4.4626e-09	3.9446e-17	8.9492e-12	9.6981e-26	6.1277e-17	3.9971e-05	1.2684e-08	4.8084e-08	0.19431
IL6_JAK_STAT3_SIGNALING	0.090488	1.3089e-07	6.1429e-14	6.7864e-10	2.1943e-20	1.4724e-13	9.8556e-05	2.7733e-07	2.662e-07	0.18839
INFLAMMATORY_RESPONSE	0.1226	8.1471e-10	2.0204e-15	9.9033e-10	1.5901e-21	1.1571e-12	6.1405e-05	1.2605e-08	9.081e-09	0.27055
INTERFERON_ALPHA_RESPONSE	0.043038	0.00040745	2.4906e-08	1.0101e-06	7.3895e-14	1.9575e-10	0.0018385	3.3674e-05	1.7429e-05	0.18157
INTERFERON_GAMMA_RESPONSE	0.074019	7.6748e-06	6.145e-11	3.2613e-08	7.7609e-17	1.0069e-11	0.00029959	3.4465e-06	1.8011e-06	0.15731
KRAS_SIGNALING_DN	0.00049687	4.5817e-17	3.0322e-16	4.2825e-23	3.2019e-06	3.9088e-05	3.003e-15	0.37785	0.85713	7.3559e-07
KRAS_SIGNALING_UP	0.24197	1.0845e-12	1.1445e-20	3.9621e-13	6.3451e-25	6.1538e-15	3.2308e-06	6.3365e-09	1.8839e-08	0.16098
MITOTIC_SPINDLE	0.00042619	0.11422	0.0035968	9.067e-07	0.36369	0.029355	8.5874e-07	0.01095	0.00012424	8.2384e-12
MTORC1_SIGNALING	0.89817	4.8993e-06	4.3122e-10	4.5526e-14	1.6362e-07	1.9208e-10	0.00018954	0.016263	0.28318	0.088845
MYC_TARGETS_V1	0.00079156	7.8003e-28	1.5713e-18	5.2086e-16	1.2299e-06	0.00021196	2.6799e-17	0.032217	0.091317	1.124e-05
MYC_TARGETS_V2	0.057142	2.6462e-24	2.1734e-13	5.8537e-09	9.4296e-07	0.00096082	8.557e-09	0.00027061	0.00040459	0.076932
MYOGENESIS	0.05345	1.2113e-23	6.3224e-39	7.2875e-33	3.4151e-12	8.4632e-12	3.9006e-17	0.00097542	0.026689	7.8678e-06
NOTCH_SIGNALING	0.80508	8.6866e-24	9.9248e-22	1.336e-13	3.005e-15	2.4666e-09	1.8439e-07	2.4155e-07	2.8404e-06	0.17131
OXIDATIVE_PHOSPHORYLATION	0.11063	4.0949e-06	0.00039414	0.073308	1.5779e-05	0.020213	0.29661	2.0484e-07	4.5592e-10	0.028641
P53_PATHWAY	0.77869	1.9186e-12	8.5394e-21	3.6936e-18	1.5075e-16	1.6734e-12	2.5975e-09	0.00029244	0.0018357	0.0010541
PANCREAS_BETA_CELLS	0.52875	0.0019352	0.0026219	0.00019631	0.00098419	0.00455	0.37258	0.061818	0.10477	0.16293
PEROXISOME	6.37e-11	0.56436	0.030694	0.41708	2.2729e-07	1.3944e-07	0.074662	2.3079e-11	8.605e-11	5.2279e-05
PI3K_AKT_MTOR_SIGNALING	0.022043	0.0037422	0.00021842	5.5197e-08	0.046093	0.0014687	0.00013062	0.55264	0.039424	0.00024936
PROTEIN_SECRETION	0.02244	0.099726	0.38798	0.053717	0.039525	6.238e-05	0.88245	0.69528	0.46636	0.30842
REACTIVE_OXYGEN_SPECIES_PATHWAY	0.23967	0.0048631	9.1032e-07	1.4286e-09	5.1793e-05	1.312e-06	2.3594e-07	0.69746	0.69324	2.5268e-08
SPERMATOGENESIS	0.26503	6.4079e-22	3.9407e-29	2.2949e-20	1.6438e-14	1.8157e-10	1.0664e-11	8.9826e-05	0.00113	0.0013808
TGF_BETA_SIGNALING	0.16365	1.4967e-13	1.3665e-12	1.2936e-06	7.3602e-15	6.5651e-08	0.0015966	1.2144e-11	2.8382e-12	0.64001
TNFA_SIGNALING_VIA_NFKB	0.60564	1.9809e-11	2.0876e-16	2.2825e-11	6.3516e-17	1.8397e-10	2.0072e-06	5.7462e-06	8.5261e-06	0.051046
UNFOLDED_PROTEIN_RESPONSE	0.81668	3.7978e-07	3.3708e-12	3.3045e-15	1.1747e-09	1.5608e-13	2.0438e-05	0.00064126	0.040019	0.070353
UV_RESPONSE_DN	0.50393	1.0454e-22	3.713e-14	8.5045e-08	3.8455e-09	4.9808e-05	3.0737e-06	3.1272e-07	3.8389e-07	0.41657
UV_RESPONSE_UP	0.59468	4.1903e-05	1.5682e-11	2.7731e-12	1.2215e-12	7.8057e-13	2.6408e-06	0.0054565	0.027143	0.00054929
WNT_BETA_CATENIN_SIGNALING	0.26725	8.6045e-14	4.6322e-15	3.8684e-11	2.34e-16	2.6024e-11	0.00087465	1.3159e-08	8.2085e-07	0.90059
XENOBIOTIC_METABOLISM	0.00069161	1.0362e-13	1.0394e-17	1.9917e-22	9.8288e-07	4.4576e-06	1.257e-21	0.31952	0.73634	9.0805e-12
