# Supplementary material for: Single-cell RNA combined with bulk RNA analysis to explore oxidative stress and energy metabolism factors and found a new prostate cancer oncogene MXRA8
Source: Aging (Albany NY). 2024 Mar 4;16(5):4469–502. doi: 10.18632/aging.205599 (PMC10968713; doi:10.18632/aging.205599)
Supplement: Supplementary Table 9 [file aging-16-205599-s010.xlsx]

## Sheet: Drug_IC50
Supplementary Table 9. Analysis of drug sensitivity differences in model grouping.
sample	A.443654	A.770041	ABT.263	ABT.888	AG.014699	AICAR	AKT.inhibitor.VIII	AMG.706	AP.24534	AS601245	ATRA	AUY922	Axitinib	AZ628	AZD.0530	AZD.2281	AZD6244	AZD6482	AZD7762	AZD8055	BAY.61.3606	Bexarotene	BI.2536	BIBW2992	Bicalutamide	BI.D1870	BIRB.0796	Bleomycin	BMS.509744	BMS.536924	BMS.708163	BMS.754807	Bortezomib	Bosutinib	Bryostatin.1	BX.795	Camptothecin	CCT007093	CCT018159	CEP.701	CGP.082996	CGP.60474	CHIR.99021	CI.1040	Cisplatin	CMK	Cyclopamine	Cytarabine	Dasatinib
TCGA-2A-A8VL-01A	-0.533565	3.70534	3.05898	5.46738	4.43851	8.7408	3.56832	4.14751	1.78407	3.31726	5.48118	-2.82522	3.49363	3.5681	3.67151	5.29119	3.03997	3.48329	0.604952	0.45299	3.14421	4.6963	-1.33986	2.2598	4.40393	2.90113	5.89828	2.29625	3.80914	2.5293	4.9351	1.5344	-5.33003	3.14296	-1.33323	2.77995	-3.2808	5.56339	3.22092	0.0212726	4.49346	-1.54432	4.77008	2.71768	3.87645	3.77102	6.74972	1.1425	2.03259
TCGA-2A-A8VO-01A	-0.508378	3.58361	3.03626	5.4541	4.15981	7.94264	3.64886	4.1799	1.78228	3.28693	5.46445	-2.82483	3.55751	3.25104	3.79245	5.10383	3.04357	3.84661	0.404389	0.407499	2.94015	4.72417	-1.45828	2.04198	4.42611	2.70449	5.90484	2.21049	3.67659	2.42707	4.94279	1.71214	-5.4294	3.30222	-1.22887	2.52828	-3.45516	5.59612	3.26089	0.168859	4.47043	-1.39291	4.78024	2.842	3.54709	3.66604	6.67435	1.07287	1.3977
TCGA-2A-A8VT-01A	-0.634479	4.7815	2.93457	5.36489	4.75734	8.55328	3.69303	4.24714	1.80381	2.98323	5.17016	-2.79474	3.61254	3.95724	4.95178	5.07117	3.23249	3.82566	0.435654	1.21369	2.18773	5.05399	-1.59883	2.24148	4.56286	2.93683	5.79379	0.615653	4.32586	3.57305	5.12215	2.18099	-4.21941	2.57064	-1.14391	4.21597	-3.93588	5.55952	3.30133	1.25347	4.61869	-1.37748	4.80741	3.06204	3.82096	3.75273	6.74461	1.10528	3.7619
TCGA-2A-A8VV-01A	-0.477913	3.50514	2.94039	5.44464	3.92277	8.38158	3.57987	4.0726	1.78357	2.91849	5.55256	-2.82753	3.25327	3.20157	3.50524	4.96334	3.1801	3.92295	-0.140311	0.295747	2.47213	4.71383	-1.45107	2.44102	4.39948	2.58095	5.87172	1.39527	3.72704	2.69789	4.90482	0.881838	-4.6589	2.97776	-1.22928	2.21043	-3.65431	5.58933	3.36885	-0.220659	4.55084	-1.3364	4.77664	3.02146	3.28531	3.78956	6.68258	0.433523	1.90662
TCGA-2A-A8VX-01A	-0.572848	3.6907	2.85269	5.44682	4.01893	8.06713	3.51466	4.01314	1.81988	3.4213	5.55374	-2.72136	3.35019	3.72748	4.00691	5.26756	3.29776	4.27492	0.575749	0.602409	2.94772	5.0537	-1.4616	2.45509	4.46391	2.87795	5.84479	1.55324	3.88002	2.97143	4.94191	2.33482	-4.60733	3.32178	-1.12152	3.28749	-3.635	5.60749	3.52827	0.55946	4.45026	-1.25207	4.8497	3.46578	3.24977	3.79177	6.68765	0.796949	2.6947
TCGA-2A-A8W1-01A	-0.620613	4.54449	2.92719	5.47076	4.40542	8.6173	3.37702	4.27076	1.84328	3.48558	5.39917	-2.74037	3.45871	3.96591	4.90306	5.26389	3.2933	4.32343	0.739641	0.843125	2.4684	5.07325	-1.37777	2.14893	4.49357	2.78776	5.82429	1.42929	4.05049	3.53429	4.76024	3.18419	-4.04548	3.31499	-1.05698	4.32951	-3.64591	5.62504	3.03888	0.761786	4.60388	-0.641952	4.86672	3.30191	3.52137	4.03674	6.76078	0.957071	4.70046
TCGA-2A-A8W3-01A	-0.548672	4.05032	2.94	5.44337	3.96841	8.20035	3.47914	4.23026	1.78211	2.86495	5.35213	-2.86127	3.10846	3.08563	3.96695	4.96356	3.22863	3.3279	-0.449489	0.567275	1.85255	4.61728	-1.50793	2.83381	4.37569	2.61405	5.83993	0.821181	3.84559	3.03893	4.91766	1.2296	-4.40983	3.08633	-1.19686	2.16465	-3.78486	5.59814	3.18043	-0.39497	4.49467	-1.48773	4.769	3.0558	3.50242	3.75866	6.68646	0.352208	2.6724
TCGA-2A-AAYF-01A	-0.665264	3.63152	3.09367	5.51625	4.55072	8.6154	3.40402	4.27123	1.80092	3.40123	5.59118	-2.80207	3.61249	3.85042	3.94184	5.40128	3.09675	3.99856	0.566941	0.436462	3.16502	4.65896	-1.56984	1.9407	4.38411	2.97306	5.92073	2.78065	3.87441	2.79151	4.99	2.54599	-5.0676	3.41825	-1.20224	3.1254	-3.05244	5.60649	3.27082	0.656602	4.46313	-1.16518	4.79211	3.28999	3.66596	3.76985	6.68189	1.25713	2.04261
TCGA-2A-AAYO-01A	-0.58412	3.49352	3.02344	5.43941	3.9493	7.9709	3.83225	4.14126	1.77138	3.31834	5.31196	-2.85219	3.50811	3.12553	3.74083	4.67256	3.03795	3.7677	-0.123274	0.314996	2.73248	4.80672	-1.5862	2.30648	4.47321	2.53526	5.91395	2.30629	3.55778	2.14599	4.87808	0.870816	-5.82755	3.1452	-1.28079	2.14208	-4.27548	5.59002	3.49649	-0.429295	4.27596	-1.55667	4.7881	2.54373	3.00251	3.60888	6.67974	0.384918	1.06022
TCGA-2A-AAYU-01A	-0.476282	3.92414	2.96797	5.46711	4.30217	8.45348	3.70721	4.13215	1.78328	3.08916	5.39843	-2.83609	3.55554	3.86004	3.89752	5.26356	3.22681	3.85832	0.590104	0.53363	2.50487	4.64229	-1.51061	2.43792	4.42666	2.6306	5.86249	1.70076	3.99018	3.04485	4.95781	1.76362	-4.65504	3.31017	-1.18587	3.05809	-3.36886	5.58008	3.07837	0.575944	4.64341	-1.33447	4.77227	3.39271	3.74595	3.80695	6.68563	1.24207	2.56569
TCGA-4L-AA1F-01A	-0.740567	2.00548	3.02071	5.51074	3.58275	7.94532	3.84409	4.09582	1.68715	3.43375	5.35996	-3.02929	3.33609	1.50452	1.61535	4.26296	2.91413	2.65957	-1.57371	0.0684579	2.47698	4.30138	-1.96364	3.21872	4.40389	2.45681	5.99702	1.16994	3.25955	1.32584	4.88789	-1.00962	-6.85302	3.11813	-1.44912	0.317948	-4.48036	5.56701	4.6864	-1.25069	3.63532	-2.44357	4.60061	1.20108	2.33556	3.31093	6.53648	-0.251901	-3.37282
TCGA-CH-5737-01A	-0.642721	3.58914	3.09489	5.51031	4.48948	9.04753	3.16607	4.3009	1.78789	3.281	5.79169	-2.82566	3.8577	4.20634	3.81605	5.43877	3.01423	3.48331	0.895937	0.398904	3.14842	4.46457	-1.20604	2.14207	4.25969	3.21686	5.96159	3.06844	4.06317	3.01129	4.95241	2.79976	-4.53393	3.20828	-1.24514	2.71786	-2.48108	5.60307	3.52351	0.780132	4.35379	-1.52828	4.7556	2.78141	3.91028	3.78052	6.74275	2.19747	1.57183
TCGA-CH-5738-01A	-0.637268	3.7212	3.05578	5.4918	3.96641	7.76293	3.30738	4.35409	1.7616	3.08073	5.30549	-2.94789	3.34868	2.7402	3.7306	4.82909	2.95693	3.17183	-0.554303	0.434703	2.04703	4.71447	-1.71523	2.29136	4.38138	2.68392	5.89657	0.527591	3.67086	2.33358	4.7762	0.0936512	-5.25911	2.65488	-1.31308	1.40326	-4.27445	5.5905	3.40284	-0.249479	4.25735	-1.70323	4.70134	1.96662	2.97839	3.61164	6.65953	-0.108083	1.013
TCGA-CH-5739-01A	-0.50361	3.86376	3.01454	5.46033	4.04801	8.00709	2.94731	4.36524	1.76845	2.86447	5.32148	-2.9184	3.19034	3.15936	4.10847	4.84688	3.09975	3.12921	-0.333336	0.423788	1.71719	4.55787	-1.39892	2.53093	4.40977	2.99139	5.8732	0.216408	3.83006	2.93196	4.81416	0.94327	-4.55436	2.82463	-1.13832	1.70543	-4.14113	5.57882	3.76053	0.159551	4.51903	-1.31209	4.71186	2.46543	3.12762	3.78755	6.62342	0.197336	2.10104
TCGA-CH-5740-01A	-0.507562	3.78436	2.87901	5.40232	4.09368	8.1407	3.71759	4.22548	1.79592	3.00758	5.39493	-2.83578	3.27193	3.32717	4.07975	4.98909	3.17478	4.07063	-0.169675	0.376987	1.93125	5.01067	-1.41533	2.1326	4.48672	2.67238	5.86252	1.46263	3.80066	2.80815	4.84358	0.834024	-4.56141	2.57739	-1.06191	2.30208	-4.2799	5.59768	3.08343	0.125419	4.74302	-1.18962	4.80543	2.61396	2.95736	3.78851	6.74234	0.167149	2.52886
TCGA-CH-5741-01A	-0.574062	4.07844	2.96432	5.51781	3.93197	9.05692	3.11475	4.1944	1.80245	3.43579	5.61584	-2.79807	3.52084	4.27518	4.13764	5.46316	3.20332	3.93392	0.153243	0.142001	2.8435	4.62755	-0.995593	2.35024	4.32756	3.11111	5.89908	2.1394	4.08478	3.32424	4.9199	2.85994	-4.05666	3.24092	-1.09748	2.4761	-3.63782	5.57956	3.07142	0.0610986	4.71723	-1.14667	4.80047	3.35879	3.6763	4.12064	6.77862	0.626707	3.11663
TCGA-CH-5743-01A	-0.852932	3.43463	3.01491	5.463	3.87597	7.31655	3.48772	4.31962	1.76242	3.21087	4.82687	-2.98504	3.67973	3.26292	3.36401	4.58678	2.84826	3.39972	-0.247754	0.703377	2.42699	4.95595	-2.2126	1.28664	4.43897	2.34098	5.85631	0.271947	3.76269	2.13986	4.7759	0.417778	-5.68253	1.72903	-1.40632	1.40447	-4.68712	5.5338	2.81884	0.0175121	4.00851	-1.89608	4.69756	1.34407	2.27173	3.52912	6.69635	0.203151	0.097976
TCGA-CH-5744-01A	-0.637588	3.85913	3.05945	5.46213	4.65369	9.14909	3.4319	4.31543	1.79531	3.42676	5.61452	-2.77827	3.64255	3.44469	3.81098	5.38916	3.03427	3.81724	0.264485	0.614525	3.13971	4.76877	-1.35076	2.49025	4.33033	2.87009	5.91835	2.3453	4.16428	2.82661	4.91156	2.77943	-4.72728	3.29241	-1.3076	2.56181	-3.23632	5.59795	3.39095	0.157638	4.40496	-1.66288	4.7718	2.8268	4.21322	3.94711	6.75032	1.14019	2.05644
TCGA-CH-5745-01A	-0.626816	3.39578	3.1119	5.47486	4.40943	7.91564	3.26637	4.25653	1.75506	2.79826	5.44225	-2.92359	3.3675	2.90017	3.48543	5.04253	2.92155	2.88209	-0.162571	0.478182	2.32493	4.48127	-1.6656	2.40862	4.3334	3.06371	5.91296	1.29253	3.74223	2.22521	4.96095	0.43768	-5.42652	2.89314	-1.34736	1.83529	-3.77866	5.55833	3.69789	-0.114788	4.30775	-1.75445	4.70123	2.11396	3.1407	3.60612	6.67663	0.621357	0.699288
TCGA-CH-5746-01A	-0.616355	3.89227	2.90589	5.45469	4.10534	8.15082	3.21005	4.29019	1.79409	3.0393	5.2004	-2.85132	3.2141	3.79569	3.90353	5.19172	3.19052	3.38515	0.145899	0.543592	2.03966	4.69952	-1.62346	1.97045	4.41057	2.85894	5.8482	0.842391	3.95401	3.06434	4.92973	1.04827	-4.55301	2.54768	-1.146	2.23873	-3.65755	5.55347	2.97851	0.311181	4.55886	-1.30551	4.77057	2.79955	3.27121	3.75417	6.69628	0.723269	2.55386
TCGA-CH-5748-01A	-0.57914	4.05916	2.96162	5.49533	4.33851	8.11492	3.17026	4.39796	1.80551	3.39016	5.45984	-2.81403	3.3618	4.11428	4.35994	5.27537	3.18725	3.51023	0.613002	0.634632	2.29691	4.77041	-1.41725	2.08255	4.37996	3.08186	5.87831	2.1028	3.97645	3.18867	4.91071	2.01163	-4.11557	3.02188	-1.03617	2.67771	-3.30216	5.59563	3.31414	0.876202	4.6423	-1.07827	4.78202	3.06935	3.50536	3.81817	6.68639	1.32758	3.14094
TCGA-CH-5750-01A	-0.688912	4.3385	2.87838	5.43589	4.23808	7.8922	3.23014	4.46327	1.80747	3.3283	5.25055	-2.8214	3.27992	3.54669	4.62851	4.97607	3.23506	3.5955	-0.313144	0.720464	1.92038	4.93404	-1.64665	2.31193	4.47308	2.47242	5.85803	0.485309	3.98798	3.18442	4.85121	1.24937	-4.44766	2.6513	-1.04905	2.20763	-4.54509	5.62512	3.17837	0.342068	4.43975	-1.34941	4.80101	2.60516	2.89333	3.74168	6.70238	0.318444	3.10533
TCGA-CH-5751-01A	-0.743049	4.6349	2.58939	5.34407	3.86115	7.31041	3.29681	4.38925	1.80258	3.41966	4.62043	-2.7746	3.21493	3.23508	4.88025	4.49537	3.40913	3.68659	-1.02399	1.02794	1.58391	5.19685	-1.74549	2.52503	4.64184	2.12208	5.8269	-0.588741	4.19857	3.59623	4.80221	1.41921	-4.43659	2.23718	-0.850475	1.61982	-5.06121	5.63528	3.54341	0.533814	4.25019	-1.59497	4.83052	2.22209	2.05276	3.64914	6.71747	0.361156	2.73071
TCGA-CH-5752-01A	-0.26265	4.57412	2.65367	5.41979	3.58668	8.42403	3.90088	4.21771	1.79985	3.2337	5.3201	-2.80476	2.97828	3.02558	4.3994	4.86416	3.46158	4.40805	-0.378444	0.163457	1.57135	4.89852	-1.30738	2.99793	4.54665	2.23813	5.81667	1.01498	4.15011	3.82747	4.87432	0.792584	-3.51364	3.17851	-0.890449	2.27066	-4.31902	5.60011	3.00536	0.128463	4.81989	-0.77076	4.82095	3.1404	3.15405	3.80425	6.69504	0.351235	4.15722
TCGA-CH-5753-01A	-0.659161	4.34339	2.90597	5.43233	4.36221	7.82438	2.93934	4.70661	1.82004	3.08745	5.13727	-2.80595	3.60771	3.97113	3.79514	5.40408	3.2111	3.42624	0.430327	0.79508	2.23725	4.99879	-1.5846	2.35235	4.39768	2.7207	5.81935	1.06248	4.35311	3.4443	4.86583	1.14636	-3.76287	3.02945	-1.02574	2.59721	-3.96636	5.54109	3.83016	0.909443	4.78165	-1.04496	4.80225	2.89151	3.52357	3.9966	6.78003	1.12944	3.67566
TCGA-CH-5754-01A	-0.888993	3.53893	2.96245	5.36832	4.479	8.26367	3.60208	4.35028	1.78574	3.29621	5.38433	-2.80897	3.61689	2.21966	3.99698	4.85925	3.1033	3.85627	-0.708326	0.782131	2.43802	5.02124	-2.00686	2.64998	4.48303	2.3956	5.89713	0.967275	3.89693	2.51219	5.01782	1.44374	-5.73871	3.09363	-1.21167	1.9626	-4.23292	5.67475	3.79894	-0.0656572	4.04317	-2.00487	4.79473	2.23015	3.51433	3.50783	6.70122	0.581287	1.25446
TCGA-CH-5761-01A	-0.923164	3.56271	2.72187	5.42135	4.38203	7.61917	3.67572	4.25752	1.81159	3.82266	4.86721	-2.77023	3.51446	3.58605	3.49416	5.44479	3.46084	4.21045	-0.438036	1.14915	1.98479	4.99692	-2.02724	2.82206	4.48109	2.78538	5.82798	0.0253626	3.95187	3.14177	5.02279	1.85431	-5.10726	3.28207	-0.847148	3.04848	-4.19861	5.67263	3.71391	1.51591	4.04938	-1.38303	4.8481	3.48979	2.92132	3.40724	6.71509	0.694059	2.08167
TCGA-CH-5762-01A	-0.683993	3.62811	2.89388	5.48767	3.93593	7.70671	3.10024	4.38368	1.76973	3.06911	5.04144	-2.94382	3.29491	3.1567	3.73328	4.85906	3.15361	2.93518	0.0265731	0.465264	1.62651	4.71677	-1.69715	2.41131	4.38025	2.70988	5.86712	-0.233815	3.81411	2.85181	4.81042	0.215691	-4.8743	2.79361	-1.13366	1.51089	-4.2102	5.55401	3.71679	0.417379	4.29541	-1.38284	4.7304	2.38585	3.00862	3.64272	6.65328	0.524931	1.78336
TCGA-CH-5763-01A	-0.534299	3.31661	2.96163	5.54799	3.77384	8.38891	3.58863	4.28962	1.74317	3.47984	5.34508	-2.94561	3.45294	3.594	3.14929	5.12757	3.01381	2.99152	0.462503	0.630837	2.86264	4.67295	-1.45884	2.3149	4.35383	2.8529	5.92557	1.89561	3.85523	2.58029	4.75524	0.86368	-4.98241	3.10642	-1.24826	1.35629	-3.58993	5.51813	3.71973	0.435414	4.21265	-1.62171	4.66318	2.09787	2.9793	3.68757	6.66443	0.889062	0.341243
TCGA-CH-5764-01A	-0.548779	4.04137	2.90835	5.47897	4.31501	8.16483	3.13636	4.40054	1.78961	3.04629	5.39466	-2.88743	3.2902	3.73976	4.12136	5.006	3.16519	3.40852	-0.162219	0.535294	1.84243	4.71398	-1.47495	2.37468	4.41438	2.84647	5.86304	0.12897	3.96691	3.22188	4.85536	0.910221	-4.19265	2.82846	-1.08919	1.65389	-3.87244	5.58864	3.69152	0.194152	4.65222	-1.08621	4.74254	2.61544	3.34589	3.78385	6.70354	0.618061	2.58359
TCGA-CH-5765-01A	-0.439496	4.16841	2.82882	5.45402	4.14866	8.05975	3.12435	4.24245	1.79971	3.05998	5.36603	-2.81445	3.21321	4.2391	3.83535	5.0977	3.32768	3.59997	0.0631914	0.466128	2.1277	4.73125	-1.31311	2.55157	4.40486	2.99282	5.83375	0.996365	4.16291	3.62584	4.929	1.2063	-3.72339	2.86878	-0.957337	2.65792	-3.64202	5.54887	3.39793	0.503217	4.68077	-1.106	4.78528	3.36405	3.11437	3.94019	6.72326	0.984627	3.5415
TCGA-CH-5766-01A	-0.763983	4.37178	3.03927	5.46146	4.63325	8.31877	2.94418	4.40575	1.80201	3.39839	5.23644	-2.82736	3.52354	4.28076	4.59133	5.10338	3.11852	3.70711	0.466023	0.776381	2.5469	4.7746	-1.49467	2.11385	4.39154	3.1037	5.85374	1.37722	4.17876	3.20811	4.88178	2.58108	-4.31348	2.70126	-1.19904	2.79396	-3.78758	5.56655	3.47833	0.882214	4.33159	-1.53194	4.77014	2.73958	3.58626	3.88782	6.72423	1.14636	2.75861
TCGA-CH-5767-01A	-0.525225	3.83282	3.10985	5.56767	4.33015	8.78956	3.20344	4.30224	1.79134	3.66242	5.80901	-2.83062	3.49925	3.92095	3.96931	5.52705	3.02117	3.32777	1.00462	0.619172	3.09084	4.51368	-0.950485	2.45419	4.22604	3.40906	5.93839	2.72254	3.85842	2.88298	4.80007	2.4065	-4.43502	3.68247	-1.20046	2.39272	-2.65646	5.58615	3.73503	0.95704	4.39936	-1.35011	4.74182	2.7742	4.27106	3.83602	6.67672	1.61928	2.20821
TCGA-CH-5768-01A	-0.659501	3.81069	2.92352	5.47709	4.08018	7.94037	3.10641	4.43541	1.80564	3.12342	5.37649	-2.85834	3.28593	3.85579	4.19999	5.00721	3.22181	3.64514	0.160983	0.502821	1.83885	4.74847	-1.6262	2.18213	4.43332	2.8368	5.85895	0.923316	3.89402	3.11692	4.88231	1.26717	-4.09576	2.85576	-1.08653	2.06657	-3.97788	5.6016	3.11115	0.363654	4.5573	-0.98367	4.79508	2.87447	2.88545	3.76348	6.62772	0.463144	2.96086
TCGA-CH-5769-01A	-0.821765	2.85118	2.87134	5.4953	4.05268	8.12469	3.11762	4.264	1.79857	3.44695	5.47366	-2.82847	3.28062	3.40565	3.04129	5.18973	3.19934	3.59111	-0.511019	0.473194	2.259	4.90103	-1.73364	2.07645	4.39274	2.42799	5.91519	0.932521	3.62134	2.35926	4.81322	0.867508	-5.37198	3.21013	-1.14918	1.61272	-4.1608	5.66176	3.36879	-0.138369	4.23861	-1.65861	4.77362	2.51714	2.86566	3.62822	6.62327	-0.0566351	0.903098
TCGA-CH-5771-01A	-0.710089	3.01176	3.07565	5.48905	4.14474	8.14858	3.54957	4.19595	1.73256	3.01993	5.42815	-2.94186	3.64079	2.59594	3.0159	4.79947	2.93705	3.08741	-0.339147	0.550767	2.50935	4.40167	-1.74542	2.39942	4.34453	2.67767	5.94185	1.75945	3.7123	2.11238	4.98044	0.180653	-5.86054	2.98456	-1.40597	1.40399	-3.65085	5.54662	3.64981	-0.168213	3.97318	-1.98628	4.69226	2.04949	3.20599	3.48724	6.6412	0.587152	-0.499456
TCGA-CH-5772-01A	-0.554177	3.68593	2.85508	5.51696	3.72178	8.5509	3.41297	4.37953	1.7971	3.14886	5.37268	-2.84181	3.29106	3.80195	3.7261	4.89498	3.27858	3.94948	0.191697	0.114271	2.31549	4.93534	-1.25202	2.40112	4.41097	2.70927	5.89843	1.19493	3.8737	3.13709	4.76451	1.29601	-4.51597	3.20934	-1.02335	2.13019	-4.12369	5.57144	3.56776	0.522135	4.6799	-0.900774	4.78127	3.08109	2.71916	3.95074	6.65474	0.385187	2.40887
TCGA-CH-5788-01A	-0.768184	4.35456	2.90356	5.50055	4.47784	8.10731	3.21566	4.44116	1.83677	3.83868	5.6453	-2.74755	3.3907	3.8816	5.02105	5.19277	3.25239	3.94797	0.810254	0.830868	2.23734	4.92397	-1.40808	2.17756	4.4274	2.46222	5.89636	2.60699	4.06044	3.27862	4.93949	2.12412	-3.83207	3.51795	-0.983523	2.07329	-3.66076	5.68931	4.08712	1.05156	4.61801	-0.78452	4.82688	2.88689	3.89008	3.95359	6.63878	0.387224	3.70464
TCGA-CH-5789-01A	-0.662816	3.9289	3.06704	5.54105	4.37037	8.36231	3.15336	4.35263	1.76482	3.48077	5.3676	-2.92067	3.50845	3.77484	3.76381	5.30364	3.01421	2.99082	0.481117	0.480421	2.83509	4.52417	-1.52477	2.08549	4.33076	2.97415	5.91541	1.80644	3.96161	2.74601	4.82547	1.47828	-5.12249	3.03146	-1.26708	1.83616	-3.18971	5.54798	3.53128	0.765426	4.27738	-1.69736	4.69356	2.33258	3.45443	3.75786	6.69466	1.20034	1.56774
TCGA-CH-5790-01A	-0.590793	4.14443	2.98124	5.48554	4.69188	8.42591	3.09211	4.48376	1.80077	3.11875	5.55612	-2.84538	3.48303	3.92096	4.08496	5.38377	3.09933	3.53834	0.0483099	0.676572	2.38524	4.6682	-1.41079	2.28838	4.36434	3.14287	5.87723	0.605023	4.17069	3.24573	4.91227	1.32029	-3.86199	3.05501	-1.11197	2.58242	-3.31966	5.58868	3.7021	0.652206	4.71309	-1.21802	4.74008	2.9199	3.52633	3.84712	6.72953	0.857712	2.89495
TCGA-CH-5791-01A	-0.904667	3.83926	3.00379	5.50373	4.83185	8.6942	2.95258	4.50077	1.79481	3.12795	5.45239	-2.86649	3.46322	3.95169	4.07154	4.92735	3.15817	3.73922	-0.132398	0.419789	2.42177	4.57859	-1.73886	2.02998	4.39252	2.7459	5.90718	0.567252	4.01536	3.01428	4.93768	1.52514	-4.77037	3.10889	-1.15454	2.07675	-3.52934	5.57594	3.71005	0.382364	4.41592	-1.39317	4.74339	2.73591	3.50082	3.8501	6.68152	1.06524	2.25294
TCGA-CH-5792-01A	-0.71779	3.22939	3.07019	5.46494	4.36938	7.7961	3.56281	4.24514	1.75005	3.14819	5.30029	-2.89313	3.58077	3.11636	3.23204	4.86356	2.9613	3.06003	-0.272838	0.477275	2.47978	4.54105	-1.83775	2.26489	4.37968	2.60091	5.92956	2.32939	3.75346	2.20266	4.96781	0.65403	-5.69855	2.90652	-1.33055	1.79497	-3.58685	5.58746	3.36354	-0.101597	4.0467	-1.97103	4.72129	2.32611	3.29203	3.51512	6.65511	0.726758	-0.165628
TCGA-CH-5794-01A	-0.67622	3.86192	2.93002	5.43694	4.2205	8.49273	3.6286	4.36292	1.80024	3.34076	5.53036	-2.78845	3.47523	3.62474	3.66058	5.21534	3.1884	4.10124	-0.0314048	0.383367	2.50771	4.76893	-1.68028	2.43531	4.37997	2.31046	5.89972	2.21511	4.08409	3.08444	4.92973	1.20472	-4.66652	3.05905	-1.21434	2.1664	-3.434	5.61263	3.17348	-0.171991	4.50111	-1.4154	4.81294	2.97702	3.76753	3.80574	6.75137	0.732295	2.23883
TCGA-EJ-5494-01A	-0.424388	4.07236	2.88461	5.45713	4.17511	8.42332	3.87307	4.25747	1.78558	3.17014	5.33217	-2.80978	3.38309	3.2924	3.94887	5.10097	3.09685	4.57707	-0.311594	0.18352	2.56916	4.79599	-1.36967	2.28871	4.45392	2.55044	5.89899	2.33993	3.97113	2.83474	4.90655	1.21675	-4.86083	2.79692	-1.0822	2.02966	-3.42002	5.58728	3.12422	0.105369	4.75197	-0.996589	4.78627	2.53729	3.22902	3.82879	6.77057	0.892312	1.83645
TCGA-EJ-5495-01A	-0.532533	3.40136	2.86425	5.49	3.74212	8.2529	3.22827	4.45838	1.74898	3.05314	5.33344	-2.93382	3.45742	3.31531	3.43647	4.69595	3.1311	2.94167	-0.144139	0.476384	1.98933	4.61875	-1.48963	2.58817	4.4608	2.88333	5.92059	0.77172	3.86037	2.78285	4.74344	0.0949874	-4.51481	2.87606	-1.14779	1.01901	-3.98749	5.52807	3.63661	0.539602	4.43461	-1.56174	4.68862	2.02319	2.90889	3.66478	6.61606	0.914447	0.830866
TCGA-EJ-5496-01A	-0.6109	3.95018	2.91148	5.50749	4.16083	8.33586	3.13349	4.4096	1.80216	3.23932	5.44079	-2.84991	3.29657	4.12916	4.04411	5.21647	3.21501	3.91933	0.281851	0.301829	2.23172	4.78247	-1.48251	2.12581	4.39192	2.87055	5.87046	1.19464	4.01899	3.33928	4.84046	1.74593	-3.97175	2.82891	-1.04859	2.16167	-3.66541	5.58048	3.21949	0.472713	4.58118	-1.06139	4.7778	2.96103	3.22972	3.83265	6.68868	0.860615	3.08807
TCGA-EJ-5497-01A	-0.611975	3.6248	2.97377	5.50963	4.16971	8.23943	2.91442	4.35823	1.77633	3.22873	5.4051	-2.89027	3.33314	3.65012	3.4589	5.24174	3.08153	3.04516	-0.189526	0.489687	2.24543	4.62014	-1.48631	2.22382	4.35632	3.25951	5.90326	1.10808	3.82881	2.76324	4.81087	0.863256	-4.5757	2.78704	-1.14175	1.70329	-3.48436	5.54985	3.72941	0.63214	4.50122	-1.43285	4.71429	2.42533	3.16665	3.79028	6.64981	0.845781	1.59766
TCGA-EJ-5498-01A	-0.594277	3.25563	2.91149	5.53258	3.83057	8.20179	3.28076	4.30578	1.74948	3.20748	5.28598	-2.9431	3.41855	3.55002	3.2067	4.75744	3.04742	3.13206	-0.115959	0.319996	2.3331	4.72086	-1.58676	2.29339	4.38891	2.85739	5.92295	1.13639	3.75944	2.54939	4.72667	0.381369	-4.97364	3.03422	-1.17435	1.20023	-3.90416	5.51976	3.75812	0.32259	4.30152	-1.42735	4.67879	2.05297	2.6466	3.73614	6.65349	0.478745	0.299037
TCGA-EJ-5499-01A	-0.894088	2.99103	2.89966	5.4943	3.95634	7.70032	3.15156	4.39611	1.78884	3.2051	5.26666	-2.90939	3.46339	3.65656	3.27355	4.88796	3.18782	3.50632	-0.39523	0.368597	1.95737	4.70862	-1.95335	2.1205	4.44847	2.28253	5.89069	0.50961	3.67447	2.56252	4.80538	0.785059	-5.24534	2.75103	-1.15729	1.80655	-4.68464	5.62665	2.98438	-0.102158	4.06484	-1.56435	4.77473	2.47975	2.34775	3.62938	6.61598	0.0412262	0.955395
TCGA-EJ-5501-01A	-0.729502	3.50739	3.01621	5.43737	4.4414	8.3177	3.60757	4.24784	1.77396	3.24612	5.48247	-2.85126	3.5292	3.65445	3.55726	5.08118	3.06347	3.64883	-0.231848	0.594758	2.59671	4.44751	-1.79804	2.19905	4.41228	2.77226	5.90394	2.05524	3.87966	2.6584	5.01104	1.59114	-4.84205	2.59982	-1.21518	2.25125	-3.48341	5.59237	3.00131	0.110619	4.14533	-1.66199	4.76901	2.59648	3.21882	3.65279	6.69637	1.0011	1.33909
TCGA-EJ-5502-01A	-0.667489	3.7021	3.02872	5.461	4.29337	7.84021	3.18178	4.2718	1.76332	3.12956	5.31356	-2.87596	3.46746	3.31795	3.48812	5.05973	2.98485	2.91513	-0.134663	0.592236	2.40404	4.60692	-1.79949	2.03201	4.39808	2.80025	5.91095	1.60704	3.83504	2.40447	4.89036	0.592627	-5.21217	2.92623	-1.27388	1.81703	-3.16471	5.56214	3.26738	0.346759	4.18855	-1.82172	4.72838	2.33315	3.68721	3.61635	6.67296	0.9614	1.05779
TCGA-EJ-5503-01A	-0.727337	3.30218	3.07065	5.47664	4.36751	8.49322	3.43097	4.16623	1.75262	3.06617	5.32336	-2.89173	3.49193	3.09395	3.26787	5.17958	2.98156	3.12756	0.0951506	0.517704	2.68666	4.47692	-1.77184	2.03781	4.38454	2.91219	5.92797	2.14017	3.72464	2.17423	4.96616	0.932903	-5.83266	2.92816	-1.37794	2.08035	-3.09519	5.55966	3.23045	0.212617	4.10203	-1.92189	4.72098	2.36293	3.50077	3.54502	6.69066	0.879631	0.347688
TCGA-EJ-5504-01A	-0.629247	3.2048	2.97457	5.5328	4.03047	8.35822	3.15446	4.2394	1.76654	3.23541	5.56221	-2.88046	3.49498	3.48159	3.5116	4.98983	3.14043	3.17366	0.0590153	0.268039	2.45181	4.65091	-1.34617	2.47368	4.35406	3.14051	5.93644	2.17311	3.66826	2.6874	4.88628	1.16326	-4.81972	3.25961	-1.13105	1.61642	-3.49539	5.57099	3.8468	0.585251	4.33236	-1.41338	4.72705	2.62557	3.24767	3.69016	6.62416	1.00337	1.06286
TCGA-EJ-5505-01A	-0.555305	3.85271	2.924	5.51458	4.21897	8.28036	3.10147	4.30043	1.79846	3.47629	5.42462	-2.81343	3.45714	4.17459	3.97574	5.30293	3.17583	3.58523	0.538834	0.303737	2.7532	4.71914	-1.31046	2.02697	4.39381	3.19558	5.90026	1.90948	3.94315	3.04614	4.86803	1.46585	-4.29878	3.02337	-1.06806	2.68149	-3.30998	5.56826	3.44716	1.13831	4.63051	-1.01589	4.77764	2.99947	3.11827	3.87145	6.69791	1.14588	2.24362
TCGA-EJ-5506-01A	-0.657304	3.74714	2.91234	5.51236	4.2763	8.08348	3.27222	4.37439	1.7842	3.2493	5.15047	-2.87064	3.56964	4.45904	3.71247	5.22205	3.13122	3.21002	0.750294	0.696143	2.6337	4.86888	-1.61502	1.68607	4.41922	3.26053	5.88305	1.65091	4.1156	3.09015	4.89143	1.60697	-4.33261	2.76822	-1.08846	2.66752	-3.40682	5.50898	3.28236	1.14101	4.45584	-1.19433	4.73245	2.79463	2.89039	3.79176	6.71966	1.5127	2.17745
TCGA-EJ-5507-01A	-0.852832	3.86114	2.9283	5.48937	4.67222	8.46655	3.15981	4.32612	1.7973	3.59052	5.38353	-2.83087	3.95092	4.12588	3.92698	5.51051	3.24824	3.6725	0.559426	0.678024	2.94342	4.7168	-1.66183	2.16003	4.44793	3.02482	5.89986	1.39376	4.07811	3.16572	4.98431	2.48699	-4.91095	3.35498	-1.06066	2.84946	-3.41561	5.59227	3.58447	1.35431	4.53245	-1.43626	4.78806	3.13951	3.43853	3.80497	6.7341	1.66894	1.80365
TCGA-EJ-5508-01A	-0.569601	3.8499	2.83991	5.47234	3.84837	7.83303	3.01869	4.38023	1.77935	3.05604	5.10013	-2.89481	3.24124	3.87855	3.72371	4.90067	3.1614	3.18574	-0.204092	0.388389	1.85527	4.76561	-1.5477	2.17484	4.44418	2.87365	5.86489	0.26565	3.86887	2.97954	4.74178	0.711676	-4.28583	2.43808	-1.04512	1.60061	-4.37636	5.54597	3.4655	0.270617	4.52404	-1.26246	4.73916	2.30311	2.71581	3.7478	6.66772	0.303657	1.97611
TCGA-EJ-5509-01A	-0.639874	3.38431	3.06276	5.47019	4.18159	7.98157	3.44793	4.24672	1.75827	3.08405	5.46803	-2.88268	3.67586	2.7801	3.77376	4.85636	2.96613	3.27799	-0.272675	0.444096	2.27291	4.38818	-1.59564	2.2687	4.38115	2.97931	5.94132	2.49252	3.68215	2.31893	4.94955	0.665249	-5.34985	2.81439	-1.28363	1.7738	-3.25591	5.58354	3.36958	0.0412298	4.26352	-1.55985	4.74344	2.06871	3.46606	3.57355	6.66485	1.01058	0.577449
TCGA-EJ-5510-01A	-0.781838	3.29805	3.03652	5.47721	4.21429	8.20079	3.09818	4.31956	1.77054	3.32551	5.45964	-2.88029	3.63616	3.70875	3.11153	4.99855	2.99534	3.21911	0.026021	0.429422	2.59312	4.69791	-1.71478	2.19397	4.33241	2.76007	5.92133	2.18673	3.83767	2.47164	4.84881	1.51428	-5.12748	2.8393	-1.27303	1.99788	-3.63514	5.55695	3.61166	0.268643	4.26814	-1.60797	4.74301	2.42738	3.32754	3.75387	6.68463	0.926674	0.616248
TCGA-EJ-5511-01A	-0.778477	3.37238	3.03553	5.45242	4.53134	8.15491	3.02697	4.27477	1.77562	2.65639	5.40378	-2.87332	3.37592	3.48962	3.60242	5.08396	3.12863	3.15901	0.464252	0.654535	2.01338	4.4868	-1.8274	2.35927	4.30826	3.414	5.88074	0.858736	3.81611	2.84492	5.0572	0.878209	-4.64055	3.34024	-1.08108	2.40725	-2.86596	5.57007	3.93865	1.13498	4.23377	-1.47046	4.74335	2.98664	3.76451	3.6598	6.59814	1.46875	1.72717
TCGA-EJ-5512-01A	-0.599816	3.32566	2.92235	5.494	3.98982	7.97623	3.32202	4.21442	1.77492	3.02052	5.30525	-2.89116	3.44475	3.97235	3.57802	4.888	3.15474	3.48559	0.28722	0.131232	2.31952	4.69672	-1.58932	1.93516	4.40208	2.84186	5.88749	1.27872	3.77957	2.77678	4.87274	1.09191	-4.85941	3.10193	-1.14597	1.90903	-3.76425	5.54628	3.39723	0.604436	4.45109	-1.24395	4.74795	2.86594	2.86514	3.71929	6.66896	0.836874	1.23504
TCGA-EJ-5514-01A	-0.782682	3.8233	2.85738	5.52673	4.10285	7.40981	2.95329	4.32961	1.78257	3.42024	5.15784	-2.8892	3.59207	4.05926	3.89016	4.79409	3.21817	3.21535	0.0521161	0.294435	2.06282	4.81753	-1.71977	2.23897	4.46319	2.83125	5.886	0.138619	3.94286	3.15069	4.80141	1.52892	-4.39286	3.1227	-0.977872	1.7598	-3.94652	5.60613	3.42388	1.14345	4.39412	-1.2589	4.73847	2.41987	2.99505	3.51785	6.67578	0.736851	1.72052
TCGA-EJ-5515-01A	-0.523668	3.69794	2.9341	5.5621	4.17541	8.40338	3.1816	4.27706	1.76717	3.57268	5.35369	-2.88582	3.50817	4.50929	3.53023	5.32409	3.15906	2.96564	0.737999	0.529565	2.89994	4.66847	-1.22871	2.14606	4.37621	3.27487	5.91375	2.01972	3.90424	2.98644	4.78717	1.56984	-4.37342	3.29235	-1.09022	2.11475	-3.23115	5.49988	3.79362	1.28899	4.31162	-1.40445	4.70632	2.87015	3.02776	3.78586	6.67377	1.44203	1.77645
TCGA-EJ-5516-01A	-0.611329	3.31411	2.93179	5.54879	3.88364	8.49195	2.86	4.40641	1.76199	3.37861	5.41343	-2.94379	3.49355	4.13857	3.15242	5.04007	3.0814	2.9719	-0.0135694	0.346009	2.35778	4.60319	-1.32421	2.4078	4.36096	3.23562	5.93393	0.843955	3.82496	2.84828	4.66457	1.47844	-4.4109	2.98611	-1.10661	1.34726	-3.88999	5.53064	3.83681	0.77597	4.41097	-1.42386	4.67955	2.27284	2.88908	3.79644	6.65382	0.869698	1.01006
TCGA-EJ-5517-01A	-0.521813	3.41731	2.98785	5.57924	3.99441	8.24814	3.1465	4.26691	1.76913	3.49436	5.52178	-2.91541	3.43583	3.85428	3.44635	5.04989	3.13064	3.31444	0.470948	0.224622	2.54897	4.5634	-1.22907	2.46787	4.34112	3.09864	5.93008	1.66071	3.62814	2.59679	4.71532	0.965383	-4.80043	3.56439	-1.13605	1.7884	-3.47943	5.55789	4.00965	0.761043	4.364	-1.25236	4.71766	2.82169	2.92675	3.79228	6.64141	0.850433	1.28571
TCGA-EJ-5518-01A	-0.690364	4.03705	3.06738	5.56275	4.2944	8.32616	3.91217	4.2107	1.76983	3.27749	5.46626	-2.87226	3.61945	3.44958	3.85151	5.20819	3.10321	4.06792	0.462236	0.510185	2.54243	4.4551	-1.52433	2.64339	4.29811	2.66114	5.92832	2.89242	3.94613	2.84476	5.00234	1.1314	-5.10429	3.83093	-1.1705	2.3649	-2.69125	5.6338	3.33712	0.937589	4.2429	-1.50325	4.74709	2.9172	4.00667	3.61982	6.62641	1.42502	1.44146
TCGA-EJ-5519-01A	-0.40278	4.39962	2.8735	5.4272	4.53264	8.59459	3.51051	4.23998	1.79237	3.59323	5.55533	-2.74866	3.4915	3.92259	4.211	5.29184	3.23595	3.357	0.712781	0.773808	2.43504	4.72252	-1.03208	2.99157	4.35211	3.02876	5.90274	2.58794	4.19213	3.29967	5.0128	1.63129	-3.75125	3.72837	-1.07038	2.96947	-2.60369	5.57665	3.84773	0.881633	4.72505	-1.28637	4.79661	3.3847	4.25003	3.92073	6.80614	2.29209	2.7544
TCGA-EJ-5521-01A	-0.817854	2.91576	3.18608	5.53582	4.89328	8.89532	3.04039	4.28646	1.77952	3.5463	5.85498	-2.84283	3.90426	3.50603	3.12876	5.59736	2.92114	3.30002	0.455129	0.429011	3.69171	4.78295	-1.53839	2.22523	4.31851	3.08692	5.99176	3.59814	3.66748	2.04919	4.85834	2.34826	-5.50171	3.71528	-1.41327	2.45345	-2.70551	5.63357	3.76431	0.439558	4.01847	-1.81757	4.74528	2.45915	3.98826	3.65527	6.66766	1.25494	0.213945
TCGA-EJ-5522-01A	-0.555515	3.96173	2.83046	5.48735	4.07005	8.03598	3.11183	4.40902	1.78622	3.35513	5.25843	-2.85389	3.31216	4.21457	3.82218	4.9803	3.23132	3.08101	0.140842	0.433345	2.12667	4.86421	-1.34695	2.1208	4.44714	2.95293	5.87796	1.01813	4.05924	3.22137	4.79865	1.15022	-3.86452	2.77378	-1.0047	1.87951	-3.85112	5.525	3.52481	0.66777	4.59333	-1.21199	4.74091	2.75906	2.96487	3.8345	6.70201	0.963082	2.50399
TCGA-EJ-5524-01A	-0.622846	3.84241	2.81752	5.50773	3.90468	8.12666	3.36102	4.33672	1.77076	3.43081	5.32275	-2.90452	3.25043	4.24809	3.53373	4.97067	3.25398	3.33521	-0.283352	0.543649	2.21056	4.75774	-1.367	2.6512	4.41876	3.17502	5.8913	0.584669	3.94821	3.10648	4.75546	0.905699	-3.8221	3.14656	-1.03723	1.63922	-4.14642	5.52919	3.90139	0.420898	4.51174	-1.48024	4.72125	2.51088	2.75009	3.78542	6.69524	0.705692	2.13064
TCGA-EJ-5525-01A	-0.645395	3.2117	2.75332	5.51915	3.62071	8.25774	3.18426	4.30623	1.77252	2.94829	5.24958	-2.89728	3.11308	3.37337	3.05681	4.79025	3.33942	3.19449	-0.488451	0.430152	1.44876	4.69424	-1.59519	2.49213	4.41762	2.42973	5.89	-0.584528	3.79565	3.00746	4.80578	-0.231132	-4.07097	2.86828	-1.05755	1.11441	-4.146	5.60025	4.02666	0.097097	4.35007	-1.1276	4.70683	2.80998	2.8855	3.70657	6.57235	-0.0397754	1.12233
TCGA-EJ-5526-01A	-0.586148	3.61991	2.82684	5.48467	3.96105	7.87699	2.97677	4.36125	1.77272	3.19995	5.08691	-2.8954	3.42434	4.01432	3.37596	5.02968	3.21228	2.78026	-0.0355882	0.582222	1.93444	4.71735	-1.43961	2.21136	4.40474	3.24667	5.87318	0.0211079	3.86584	2.93023	4.79161	0.303471	-4.02419	2.77198	-1.01161	1.88492	-4.08456	5.52391	3.79908	0.806232	4.4887	-1.34575	4.71695	2.59231	2.88182	3.76992	6.688	0.715089	1.78638
TCGA-EJ-5527-01A	-0.56733	3.71689	2.88495	5.52132	3.9648	8.12682	3.10662	4.39768	1.76684	3.19668	5.26923	-2.91054	3.30765	4.22377	3.53098	4.7448	3.16313	3.15383	-0.211521	0.253347	2.12159	4.68872	-1.39811	2.18557	4.41184	3.0359	5.87833	0.908231	4.00668	3.21105	4.75819	0.784544	-3.99711	2.66916	-1.04883	1.47021	-4.02386	5.52166	3.89445	0.474172	4.59761	-1.18021	4.70454	2.53078	2.69658	3.8057	6.6762	0.581233	1.83575
TCGA-EJ-5530-01A	-0.470123	3.84002	2.91536	5.47087	4.23482	8.67611	3.27113	4.3081	1.78177	3.0431	5.55629	-2.82542	3.12864	3.61194	3.64439	5.35587	3.19943	3.47571	0.0103387	0.403757	2.16777	4.53434	-1.33388	2.58892	4.34969	3.09897	5.89111	1.47579	4.02961	3.07881	4.98187	1.14355	-4.17444	3.26092	-1.10074	2.16496	-3.06296	5.56109	3.54491	0.452582	4.63662	-1.20643	4.74629	3.21052	3.75839	3.82023	6.67334	0.912575	2.33715
TCGA-EJ-5531-01A	-0.869721	3.23018	3.05537	5.51237	4.30186	8.05748	2.93444	4.32297	1.76529	3.16561	5.45503	-2.88693	3.69172	3.65962	3.5424	5.08944	3.01335	3.017	0.0049706	0.527472	2.53942	4.47445	-1.82848	2.04195	4.37845	2.94662	5.93892	2.19687	3.64127	2.27263	4.9197	1.1685	-5.54352	3.22678	-1.24163	2.17183	-3.24402	5.58481	3.53542	0.518664	4.05613	-1.77806	4.73726	2.52475	3.37709	3.55736	6.6387	1.00111	0.228603
TCGA-EJ-5532-01A	-0.520594	3.65576	3.01553	5.52374	4.33599	8.36826	3.27699	4.27226	1.78137	3.52532	5.47554	-2.85214	3.36545	3.73333	3.81062	5.27364	3.14639	3.28443	0.413	0.553602	2.39254	4.6579	-1.24714	2.40933	4.38523	3.14385	5.90225	2.36214	3.87864	2.96545	4.83188	2.13176	-4.44527	3.05459	-1.07928	2.6576	-3.24395	5.58645	3.72906	1.14139	4.39098	-1.28774	4.74803	3.03221	3.69491	3.65068	6.6858	1.27591	2.22479
TCGA-EJ-5542-01A	-0.525732	3.70794	2.83949	5.54657	4.17507	8.29922	3.01016	4.39083	1.78191	3.24945	5.43041	-2.87915	3.35351	4.06948	3.69139	5.1572	3.24581	3.18656	0.0707939	0.4394	1.96411	4.64096	-1.18234	2.4328	4.38394	3.22961	5.91434	0.931662	3.96925	3.16403	4.75832	0.898293	-3.88495	2.99802	-0.998717	1.80344	-3.63535	5.5401	3.78646	0.963338	4.62426	-1.07563	4.72104	2.88002	2.74974	3.94078	6.63651	0.798716	2.25749
TCGA-EJ-7115-01A	-0.690214	3.0818	3.04136	5.49696	4.15556	8.40142	3.26363	4.21294	1.76303	3.05153	5.57954	-2.86318	3.54342	3.31052	3.1302	5.24605	3.04705	3.27451	-0.0158646	0.464138	2.71811	4.37939	-1.67528	2.28916	4.3375	3.09795	5.93052	2.29933	3.75935	2.3601	4.99336	1.11395	-5.13135	3.23543	-1.29022	2.13559	-3.05248	5.56808	3.45756	0.309597	4.27213	-1.57469	4.74015	2.72001	3.41105	3.62815	6.66129	0.929677	0.322866
TCGA-EJ-7123-01A	-0.62802	3.75709	3.08521	5.49512	4.3236	8.65085	3.14893	4.35026	1.79293	3.30822	5.71647	-2.81307	3.57029	3.75926	4.17964	5.05317	3.06675	3.47643	0.567731	0.490548	2.77728	4.61722	-1.33752	2.29718	4.33287	3.12506	5.92089	2.63264	3.94997	2.9504	4.92628	2.27628	-4.37853	3.20157	-1.16891	2.67007	-2.6637	5.62342	3.48833	0.836945	4.51329	-1.25291	4.76953	2.96246	4.02249	3.73872	6.6891	1.42287	2.02548
TCGA-EJ-7125-01A	-0.512522	3.53429	3.0241	5.55303	4.15392	8.57244	3.25446	4.25084	1.77733	3.3949	5.77888	-2.83631	3.50716	3.60187	3.55364	5.32158	3.07351	3.31382	0.380324	0.357497	2.77087	4.59481	-1.11743	2.5251	4.29149	3.10408	5.95094	2.6171	3.80633	2.77104	4.85576	1.93605	-4.60363	3.43983	-1.14679	2.34365	-2.71665	5.58584	3.96167	0.846902	4.45416	-1.47799	4.72579	2.61935	3.68735	3.70145	6.70812	1.24611	1.56509
TCGA-EJ-7314-01A	-0.661802	3.49837	3.03377	5.49626	4.38293	8.60896	3.37249	4.38085	1.78389	3.04218	5.51457	-2.87274	3.46609	3.02706	3.8547	5.19504	3.0544	3.71757	-0.0553653	0.343976	2.55427	4.58947	-1.58739	2.22211	4.37522	2.70187	5.90079	1.59447	3.98788	2.80031	4.92475	1.53112	-4.92392	2.88227	-1.26556	2.41899	-3.76289	5.61845	3.21689	0.0859374	4.46334	-1.36471	4.75631	2.55439	3.24234	3.76619	6.69229	0.561672	1.71235
TCGA-EJ-7315-01A	-0.922587	2.86224	3.08469	5.48124	4.47761	8.00281	3.43461	4.31092	1.76153	3.40149	5.56383	-2.92565	3.684	3.30587	3.12829	4.94103	3.00672	3.41336	-0.429883	0.034135	2.65884	4.56703	-1.85364	2.28919	4.35598	2.90964	5.96093	1.97021	3.528	2.06647	4.93489	1.26006	-5.49976	3.00877	-1.29916	1.49899	-3.79959	5.61838	3.82467	-0.232958	4.08039	-1.99274	4.72395	2.02194	3.38166	3.48636	6.66483	0.657218	-0.153765
TCGA-EJ-7317-01A	-0.56178	3.49613	3.09257	5.50651	4.41028	8.91173	3.28895	4.1159	1.77169	3.39633	5.83541	-2.82913	3.51943	3.54542	3.63837	5.39336	3.04189	3.48034	0.532734	0.285017	3.05841	4.39916	-1.2679	2.21783	4.2925	3.18684	5.95151	3.26821	3.78889	2.64022	5.01636	2.07773	-5.00524	3.44489	-1.22498	2.55352	-2.49586	5.59241	3.49804	0.697147	4.30932	-1.50515	4.75601	2.99195	4.00361	3.68235	6.67922	1.6878	1.18381
TCGA-EJ-7321-01A	-0.588684	3.95817	2.94928	5.43647	4.22065	7.7198	3.29644	4.41265	1.79783	2.88563	5.39956	-2.85604	3.20504	3.4876	3.94391	4.86798	3.14446	3.76872	-0.462187	0.372141	1.71034	4.75874	-1.60976	2.38181	4.38607	2.7123	5.84646	0.531094	3.94531	3.07772	4.89061	0.930953	-4.10709	2.59175	-1.08479	1.97548	-4.39984	5.60143	3.3518	-0.163045	4.54248	-1.19508	4.77794	2.68754	2.92947	3.82028	6.6808	0.117652	2.67228
TCGA-EJ-7327-01A	-0.615998	3.44547	2.82474	5.45078	4.09838	8.30108	3.38649	4.25356	1.76728	3.01076	5.28449	-2.83867	3.2051	3.69124	3.39098	4.97117	3.23669	3.39562	-0.260517	0.415752	2.00255	4.66734	-1.62069	2.37361	4.41065	2.9786	5.89275	1.42349	4.0328	2.95345	4.98574	0.710216	-4.38184	2.94872	-1.08103	1.78097	-3.49232	5.54169	3.54963	0.463508	4.48197	-1.43443	4.74177	2.88859	3.0074	3.72526	6.67785	0.805961	1.34647
TCGA-EJ-7328-01A	-0.655005	3.33428	2.96268	5.39511	3.79761	7.62258	3.60876	4.20794	1.75555	2.75957	5.1512	-2.93233	3.32482	2.48621	3.39479	4.4025	2.99515	3.40986	-0.866269	0.365431	1.86711	4.78509	-1.88857	2.25088	4.47849	2.46144	5.85582	-0.0506042	3.55117	2.14879	4.84979	-0.0514696	-5.57561	2.18123	-1.24692	1.54736	-4.90381	5.58238	3.36998	-0.773252	4.17767	-1.7918	4.74025	1.84988	2.85529	3.5465	6.65378	-0.400403	0.657004
TCGA-EJ-7330-01A	-0.588031	3.85968	2.95265	5.50522	4.27055	8.23157	3.47621	4.29844	1.77109	3.14996	5.30703	-2.86629	3.68973	3.22016	3.85278	5.15628	3.04932	3.26428	0.323274	0.561551	2.57676	4.60007	-1.54424	2.37706	4.36303	2.83011	5.9021	2.21216	4.08829	2.8967	4.93806	0.917682	-4.91213	2.92584	-1.2299	1.95433	-3.18628	5.54431	3.49446	0.842944	4.52606	-1.29803	4.72995	2.39326	3.288	3.74766	6.69856	1.06491	1.37899
TCGA-EJ-7331-01A	-0.524831	3.55497	2.9849	5.52731	3.97698	8.19261	3.15249	4.26503	1.75791	3.28499	5.46675	-2.89454	3.41027	3.93053	3.41283	5.11001	3.10678	2.81774	0.236367	0.441517	2.3372	4.53178	-1.35701	2.46571	4.35539	3.33379	5.92532	1.80514	3.83808	2.82978	4.84165	0.993977	-4.54792	3.10574	-1.09716	1.81641	-3.17867	5.53116	3.7975	0.890892	4.36795	-1.5329	4.69983	2.72359	3.39888	3.6842	6.65479	1.41736	1.25382
TCGA-EJ-7781-01A	-0.562793	3.76981	2.93377	5.47895	4.27936	7.87674	3.21513	4.32966	1.78362	3.31967	5.30597	-2.8378	3.38257	4.04542	3.8141	5.10987	3.15229	2.89091	0.204827	0.79843	2.2893	4.7118	-1.59179	2.13975	4.43664	3.15177	5.8856	1.48826	3.96254	2.99729	4.89667	1.65836	-4.09735	3.11558	-1.07648	2.35246	-3.02944	5.55945	3.92969	1.16666	4.42805	-1.24225	4.74305	2.8651	3.65319	3.62611	6.70281	1.48462	2.03281
TCGA-EJ-7782-01A	-0.679785	4.14496	2.983	5.44384	4.31032	8.21846	3.03357	4.17916	1.77575	2.92688	5.57388	-2.82291	3.53919	3.71201	4.20505	5.19099	3.23267	3.14418	0.393452	0.255012	2.1474	4.53002	-1.72571	2.62814	4.3787	2.76336	5.88575	2.41011	4.09882	3.24437	5.12932	1.71288	-4.80112	3.32168	-1.09794	2.41441	-3.23281	5.57562	3.26757	0.660704	4.41929	-1.79634	4.76629	3.0587	3.75595	3.69372	6.71829	1.40043	2.34572
TCGA-EJ-7783-01A	-0.533553	3.90101	2.80264	5.42116	3.88573	7.97397	3.25179	4.27559	1.77685	2.93001	5.038	-2.8392	3.1997	3.62086	3.7348	4.67126	3.15894	3.42215	-0.3332	0.497792	1.98667	4.85071	-1.70207	2.19066	4.44382	2.76888	5.85295	0.561434	4.08578	3.09218	4.90998	0.160384	-4.42168	2.48207	-1.10888	1.72543	-3.82587	5.51726	3.36373	0.222292	4.54975	-1.29861	4.74234	2.4595	2.85822	3.7001	6.7271	0.519693	1.63161
TCGA-EJ-7784-01A	-0.479562	4.45762	2.86331	5.39237	4.59913	8.28751	3.28443	4.42909	1.80975	2.78216	5.32249	-2.7698	3.41919	3.56274	4.73701	4.84325	3.25562	3.42655	0.113114	0.485971	1.86253	4.68545	-1.25146	1.9474	4.49072	2.89789	5.86544	1.18733	4.25828	3.61242	5.03925	1.39324	-3.95639	2.33658	-0.986938	2.1984	-3.41581	5.56161	3.46442	0.879878	4.75356	-0.846435	4.80156	3.04148	3.29235	3.98585	6.68953	1.1692	3.68067
TCGA-EJ-7785-01A	-0.54943	3.55226	2.91484	5.44888	3.96104	8.01332	3.12652	4.31069	1.75809	2.81674	5.16964	-2.89903	3.20823	3.4649	3.44806	4.79552	3.1189	2.97319	-0.197343	0.438798	1.81175	4.59169	-1.6309	2.42229	4.38979	2.99933	5.89149	0.451536	3.91908	2.82264	4.8548	0.394176	-4.53286	2.80402	-1.15374	1.30529	-3.5502	5.53436	3.57229	0.427538	4.31809	-1.6661	4.70518	2.48664	3.08858	3.65018	6.63564	0.530405	1.15058
TCGA-EJ-7786-01A	-0.505443	3.94692	2.97619	5.51195	4.22458	8.29142	3.2676	4.20677	1.77453	3.35614	5.54469	-2.82564	3.45553	4.10964	3.94913	5.34672	3.14782	3.25741	0.746759	0.518178	2.79396	4.59461	-1.34357	2.34715	4.38524	3.27832	5.92559	2.74639	3.91175	2.91941	4.96284	1.42622	-4.58772	3.47276	-1.11085	2.53401	-2.44074	5.53979	3.52911	1.22919	4.54681	-1.26787	4.75763	3.21494	3.83694	3.75406	6.67575	1.75974	1.9705
TCGA-EJ-7788-01A	-0.684567	3.37119	2.88755	5.51233	4.08109	8.29109	3.13127	4.29619	1.77869	3.12606	5.46437	-2.84894	3.19394	3.50639	3.25244	5.14337	3.2535	3.25617	-0.255546	0.693968	1.89547	4.57224	-1.55246	2.58103	4.37785	3.17733	5.90519	0.880567	3.67528	2.7127	4.94623	0.399182	-4.63935	3.16446	-1.09784	2.03268	-3.52631	5.56922	3.43661	0.600565	4.3281	-1.52891	4.74795	2.95665	3.41445	3.68579	6.58461	0.61258	1.72069
TCGA-EJ-7789-01A	-0.492132	4.55462	2.73004	5.42403	4.09745	8.8174	2.78338	4.18397	1.8229	3.28224	5.28144	-2.71826	3.3564	4.21794	4.76677	4.46185	3.44792	3.2722	0.221492	0.52946	2.17726	5.0298	-1.02904	2.2835	4.47473	2.45723	5.84762	1.45656	4.24088	3.9181	4.89182	1.39716	-3.64585	3.13953	-0.970757	2.18683	-4.16786	5.59904	3.38075	0.769875	4.59238	-0.901937	4.84597	3.3538	3.53429	3.92963	6.74981	1.02328	4.19491
TCGA-EJ-7791-01A	-0.590531	3.21321	3.01485	5.51291	3.97284	8.20882	3.32175	4.17303	1.73946	3.00305	5.40696	-2.91441	3.48054	3.20548	3.29071	5.02787	3.03446	2.69078	0.138068	0.419758	2.53252	4.38289	-1.6083	2.36542	4.36411	2.98157	5.93772	1.98426	3.72093	2.35869	4.96216	0.560262	-5.43387	3.19881	-1.27125	1.68575	-3.2551	5.53619	3.60001	0.423786	4.18007	-1.78897	4.68707	2.46925	3.25388	3.54337	6.63703	0.954967	0.0518414
TCGA-EJ-7792-01A	-0.516076	3.22696	2.98081	5.50121	3.8025	7.88597	3.45304	4.11227	1.72686	2.97455	5.29394	-2.94966	3.28354	2.85256	3.19596	4.75171	3.04703	2.88066	-0.299808	0.350922	2.18227	4.35076	-1.71282	2.71495	4.41721	2.81691	5.92745	1.45465	3.52564	2.17086	4.83824	-0.368342	-5.63207	3.36933	-1.25406	1.1457	-3.35198	5.53842	3.92295	0.186311	4.15844	-1.76467	4.68251	2.42599	3.19324	3.48412	6.57718	0.597249	0.0464586
TCGA-EJ-7793-01A	-0.590221	3.3269	3.00262	5.50628	4.42248	8.56195	3.21523	4.20569	1.77161	3.29755	5.61786	-2.84281	3.51727	4.02558	3.39284	5.33523	3.07893	3.39153	0.531549	0.434854	2.88857	4.57789	-1.33634	2.03041	4.34589	3.17051	5.93699	2.59161	3.84811	2.68806	4.90791	1.75065	-4.82877	3.18444	-1.18711	2.37738	-2.8096	5.55774	3.45591	0.768023	4.40013	-1.50808	4.73802	2.92704	3.46414	3.74123	6.68585	1.43921	1.24765
TCGA-EJ-7794-01A	-0.617287	3.52129	2.99786	5.47261	4.15331	7.91607	3.23493	4.27913	1.76292	3.17535	5.35695	-2.8773	3.49074	3.41544	3.74092	4.93856	3.04641	3.02355	0.223187	0.523799	2.29886	4.61697	-1.59101	2.25536	4.39426	2.9622	5.91068	2.00977	3.79995	2.6085	4.91285	0.87762	-4.8092	2.9399	-1.19283	1.76256	-3.14452	5.56922	3.49629	0.550684	4.31644	-1.51628	4.72887	2.40376	3.39773	3.60387	6.65166	1.25487	0.855196
TCGA-EJ-7797-01A	-0.664786	3.56003	3.00099	5.46925	4.36379	8.2121	3.36672	4.27182	1.78349	3.06909	5.37869	-2.87868	3.47143	3.19572	3.59533	5.2063	3.07728	3.45726	-0.077061	0.464762	2.22687	4.66834	-1.73878	2.17152	4.35339	2.73086	5.8754	1.02223	3.7982	2.57578	4.91196	0.721333	-5.00077	2.92602	-1.24904	2.11876	-3.58639	5.59642	3.48843	0.076742	4.49309	-1.41642	4.75011	2.59567	3.52069	3.70952	6.7074	0.64544	1.54442
TCGA-EJ-8468-01A	-0.566096	3.94634	2.95596	5.5091	4.06642	8.13484	3.28114	4.24929	1.76626	3.14473	5.29405	-2.85867	3.55909	3.52802	3.89842	5.04965	3.1027	3.15099	0.359555	0.435609	2.47062	4.66265	-1.46668	2.36699	4.43552	3.06383	5.89773	1.33093	3.86231	2.74048	4.84095	0.70529	-4.97486	3.17884	-1.18262	2.35029	-3.65416	5.52233	3.79788	0.557167	4.36384	-1.46964	4.73375	2.644	3.32355	3.77663	6.72394	0.89408	1.41064
TCGA-EJ-8469-01A	-0.575476	4.61474	2.64877	5.41997	3.78904	8.12388	2.91722	4.35482	1.82899	2.99777	4.85738	-2.75771	3.38726	4.05572	4.60659	4.82046	3.50621	3.96297	0.241195	0.152908	1.64912	5.24104	-1.36555	1.92015	4.57597	2.06426	5.79272	0.222023	4.36555	4.08708	4.74289	1.59121	-3.28628	2.85275	-0.812937	2.30682	-4.33429	5.59271	3.16861	0.408956	4.66636	-0.693798	4.85272	3.45653	2.99864	3.95943	6.73488	0.157152	4.48791
TCGA-EJ-8470-01A	-0.767118	4.22652	2.96197	5.41136	3.99094	7.49463	3.11875	4.41294	1.78955	3.00686	4.83881	-2.92373	3.30065	3.77408	4.63185	4.29196	3.08888	3.20781	-0.241568	0.632413	1.44716	4.79817	-1.90559	1.91314	4.49975	2.38095	5.82271	-1.13659	3.73535	2.64213	4.73353	0.161828	-5.23261	2.18015	-1.164	2.2629	-5.41868	5.59796	2.81436	-0.142799	4.44092	-1.59406	4.7725	2.35613	2.67532	3.62275	6.72363	-0.0864721	2.57205
TCGA-EJ-8472-01A	-0.856146	3.39734	2.77132	5.48241	3.9323	8.04737	3.27883	4.11797	1.80176	2.79754	4.99357	-2.85389	3.49628	4.06952	3.4744	5.03997	3.38729	3.40182	0.308806	0.700021	2.13761	4.97725	-1.78215	2.2512	4.46326	2.37468	5.84064	-0.390152	3.73036	2.81562	4.84988	0.650342	-4.52065	3.05886	-1.11917	2.89218	-4.60768	5.5223	2.80439	0.40667	4.23677	-1.65212	4.79838	3.17279	2.77889	3.82509	6.688	0.373085	2.3635
TCGA-EJ-8474-01A	-0.635589	3.31657	2.91487	5.46378	3.93628	8.03388	3.39475	4.15944	1.77568	3.01125	5.35091	-2.87786	3.3138	3.49643	3.61691	4.76706	3.20409	3.41037	0.0967676	0.423387	2.06909	4.71886	-1.6663	2.39653	4.43252	2.92688	5.8818	0.668256	3.57916	2.61558	4.90929	0.828021	-5.04311	2.96619	-1.11848	1.97871	-4.18972	5.55975	3.39094	0.0587323	4.48273	-1.53689	4.75729	2.68047	2.81232	3.70306	6.6274	0.454355	1.67531
TCGA-EJ-A46B-01A	-0.570721	3.58588	3.05182	5.45343	4.36208	8.5207	3.56336	4.05762	1.76416	3.14057	5.41481	-2.84055	3.50861	3.67491	3.70437	5.21912	3.04653	3.3913	0.468516	0.494504	3.05937	4.68442	-1.56953	1.90529	4.42166	2.91293	5.90002	2.70495	3.76738	2.52573	5.02662	1.65449	-5.48967	2.93916	-1.26939	2.91666	-3.03283	5.54821	3.19589	0.412622	4.26928	-1.66481	4.75477	2.91259	3.63461	3.62714	6.71261	1.26542	1.32677
TCGA-EJ-A46D-01A	-0.645736	3.6803	3.0253	5.42934	4.13924	8.39401	3.4716	4.08262	1.7732	2.80579	5.2823	-2.86129	3.38878	3.13272	3.88389	4.89671	3.08503	3.58009	0.0535834	0.335924	2.38802	4.74605	-1.79654	2.0538	4.44294	2.54767	5.8653	1.44137	3.74518	2.50558	4.9967	0.789538	-5.53262	2.68529	-1.31013	2.4177	-3.7303	5.57333	2.96866	-0.0966244	4.3342	-1.60207	4.77653	2.6348	3.5027	3.62187	6.69482	0.535646	1.68866
TCGA-EJ-A46E-01A	-0.685961	3.40089	3.03738	5.4097	3.95742	7.82003	3.73826	4.11131	1.74909	2.55855	4.88206	-2.93297	3.54583	2.97729	3.31712	4.93734	2.92053	3.47798	-0.0297115	0.726392	2.53207	4.68413	-2.06269	1.60211	4.42267	2.50015	5.84387	0.883688	3.79629	2.22833	5.03072	0.649611	-6.02634	2.12359	-1.43833	1.92969	-4.07189	5.52149	2.88293	0.100887	4.0421	-1.89986	4.70903	1.95162	2.8403	3.52835	6.71066	0.30633	0.0247733
TCGA-EJ-A46F-01A	-0.601053	3.75279	2.87873	5.38348	4.29666	8.81875	3.94504	4.07194	1.83306	3.6223	5.70345	-2.68251	3.741	3.22337	4.43109	4.83046	3.2255	4.72102	0.331382	0.361825	3.4169	5.32849	-1.23337	2.17081	4.56277	2.33779	5.89317	2.37448	3.93401	2.89817	4.93147	2.16464	-4.55023	3.2773	-1.19139	2.99863	-4.11235	5.66207	3.03365	-0.722139	4.72872	-1.16194	4.8919	2.8273	3.58847	3.84484	6.81301	0.436897	2.86779
TCGA-EJ-A46G-01A	-0.391507	3.8196	2.85176	5.36856	4.28036	8.65992	3.96195	4.18322	1.78909	2.9021	5.41401	-2.72768	3.29148	2.90433	3.638	5.16399	3.22903	4.08077	-0.343333	0.893111	2.72035	4.95345	-1.32865	2.64037	4.44581	2.7075	5.89262	2.45948	4.0672	2.74656	5.02312	0.995872	-4.92768	2.86342	-1.11721	2.30825	-3.6749	5.56218	4.06814	0.0278257	4.72528	-1.6067	4.79928	2.71707	3.81643	3.62219	6.71742	0.943957	2.23922
TCGA-EJ-A46H-01A	-0.699263	3.06641	3.03394	5.44753	3.93545	8.07419	3.63412	4.17316	1.73142	3.02992	4.88056	-2.94646	3.63474	2.32026	2.62462	4.68782	2.77506	3.50975	-0.289766	0.625553	2.72573	4.67546	-2.26826	1.7808	4.41217	2.59331	5.90128	1.55073	3.73701	1.72075	4.92112	-0.0403956	-6.09626	2.0691	-1.47695	1.28492	-3.44488	5.51902	3.4616	0.0205798	3.88964	-2.09581	4.65381	1.23701	2.83738	3.55525	6.71518	0.394104	-1.43169
TCGA-EJ-A46I-01A	-0.586996	3.5559	3.01177	5.4225	4.13298	8.10493	3.48258	4.13703	1.76446	2.92526	5.2587	-2.84921	3.38979	3.42068	3.65717	5.19555	3.02463	3.18443	0.258962	0.666358	2.63564	4.66702	-1.81855	1.83994	4.41372	2.89929	5.87973	1.996	3.84757	2.46081	5.07062	1.26474	-5.37846	2.73461	-1.30317	2.43147	-3.34519	5.53671	3.1955	0.418303	4.25453	-1.65896	4.7448	2.66471	3.40276	3.56073	6.68476	0.895064	0.999078
TCGA-EJ-A65B-01A	-0.773249	2.83208	3.21625	5.50251	4.45889	8.76884	3.89045	3.883	1.77081	3.40463	5.68932	-2.84901	3.87715	2.89009	3.52578	4.89131	2.90459	4.25063	0.469874	0.340557	3.68045	4.66275	-1.84176	2.11684	4.42053	2.34685	5.95257	3.40412	3.38517	1.6544	4.94887	1.55527	-6.8268	3.41701	-1.50921	2.34647	-3.73281	5.67858	3.0149	-0.417804	3.75653	-2.00929	4.78197	2.27297	3.5531	3.43596	6.63802	0.484751	0.00873222
TCGA-EJ-A65D-01A	-0.694698	3.69473	2.88614	5.33097	3.92083	8.25307	3.57209	3.94049	1.83886	3.1618	5.42733	-2.68525	3.23822	3.03318	4.3438	4.73187	3.27967	4.70751	-0.268102	0.343621	2.6111	5.14171	-1.8161	2.24905	4.55612	1.9509	5.83611	1.37636	3.67938	2.64513	5.08054	1.64758	-5.42667	2.96879	-1.25321	3.117	-4.99232	5.71731	2.6097	-1.21581	4.33269	-1.3658	4.93936	2.97797	3.16748	3.70354	6.72584	-0.615183	2.7149
TCGA-EJ-A65E-01A	-0.777413	3.64597	2.97882	5.46338	4.28316	8.3573	3.0002	4.16472	1.80489	3.0919	5.23127	-2.81511	3.52709	3.74611	4.0867	5.3711	3.19731	3.59733	0.516369	0.591358	2.68033	4.8203	-1.64143	2.00721	4.42467	2.80844	5.85405	0.862977	3.85842	2.70081	4.9446	1.78961	-5.39969	3.08941	-1.23143	3.69008	-3.96304	5.59206	2.86527	0.57183	4.48872	-1.35411	4.8128	3.10447	3.13697	3.77528	6.70996	0.403709	2.20941
TCGA-EJ-A65F-01A	-0.528069	4.05262	2.92637	5.46256	4.06803	8.64538	3.61565	4.25488	1.78411	2.96994	5.28665	-2.85261	3.48278	3.18843	4.08252	5.13237	3.21037	4.0147	0.335936	0.458205	2.12366	4.81085	-1.31051	2.47273	4.40945	2.69367	5.84015	1.53413	4.00133	3.22221	4.99208	1.46654	-4.3763	2.9861	-1.2052	2.32333	-3.80733	5.55146	3.22173	0.188082	4.54843	-1.1151	4.78286	2.86037	3.76498	3.75082	6.71155	0.6733	2.7837
TCGA-EJ-A65G-01A	-0.518146	4.03502	3.0456	5.47521	4.32175	8.49858	3.29258	4.17182	1.79413	3.34917	5.53945	-2.801	3.52838	4.10878	4.21831	5.40917	3.11182	3.46923	0.896581	0.471328	2.94465	4.75531	-1.24641	1.9778	4.39395	3.03327	5.8931	2.46802	3.7681	2.80789	4.97275	2.05621	-5.02688	3.26544	-1.129	3.08673	-2.99769	5.57569	3.26292	0.60834	4.52924	-1.32222	4.79202	3.19757	3.87384	3.79813	6.70337	1.39645	2.57111
TCGA-EJ-A65J-01A	-0.764991	3.93492	3.18461	5.55846	4.56381	9.11918	3.36308	4.39823	1.79185	3.33726	5.82703	-2.82184	3.94508	3.87508	4.05782	5.65188	3.07	3.40111	0.75271	0.635124	3.01083	4.50544	-1.3289	2.57324	4.29824	3.06629	5.94563	2.63184	4.13943	3.10225	4.94944	2.53134	-4.90003	3.56483	-1.20606	3.1489	-2.26439	5.62015	3.57658	0.643637	4.36078	-1.62076	4.75799	3.19468	4.32314	3.79891	6.72493	1.39774	2.17424
TCGA-EJ-A65M-01A	-0.865236	3.16414	3.08677	5.50642	4.24287	8.36328	3.22403	4.12077	1.79147	3.36	5.55487	-2.83203	3.78982	3.39981	4.12647	5.02168	3.08629	3.53959	0.590391	0.194917	2.9842	4.80188	-1.6941	1.96561	4.44379	2.45458	5.92501	2.4854	3.42801	2.07088	4.93736	1.7083	-6.29231	3.34016	-1.34241	2.7719	-4.06386	5.64041	3.02757	-0.229313	4.06729	-1.74375	4.81977	2.6924	3.28126	3.61969	6.66125	0.432889	0.952897
TCGA-EJ-A6RA-01A	-0.788612	3.36298	3.08674	5.45701	4.34518	8.24378	3.73234	4.02299	1.77893	3.04221	5.30419	-2.86119	3.60723	3.1644	3.90353	4.92874	3.02423	3.83581	0.222418	0.261934	2.86471	4.77149	-1.89808	1.72286	4.41989	2.46251	5.88732	2.12441	3.58015	2.11159	5.00775	1.25887	-6.1556	2.79973	-1.37598	2.53097	-4.02608	5.60993	2.85652	-0.385647	4.11036	-1.65787	4.79277	2.51231	3.07993	3.56954	6.70302	0.372803	0.991327
TCGA-EJ-A6RC-01A	-0.644931	3.09693	3.0417	5.4587	3.91676	7.77868	3.73047	4.10618	1.74147	2.93969	5.29659	-2.89541	3.52203	2.94874	3.18108	4.77915	2.99003	3.26231	-0.0956329	0.257406	2.44506	4.43909	-1.8945	2.31717	4.40415	2.57265	5.92607	1.94761	3.46084	1.82167	4.94981	-0.0140466	-6.06439	3.1585	-1.37237	1.7643	-3.51743	5.56784	3.34179	-0.318568	4.00428	-1.94348	4.73945	2.55314	3.54967	3.43825	6.63634	0.613602	-0.396151
TCGA-EJ-A7NF-01A	-0.509948	3.93647	2.95732	5.40847	4.31031	8.28634	3.57384	4.1665	1.80373	3.11984	5.53736	-2.77694	3.19946	3.38039	4.27637	5.01745	3.14276	4.15202	-0.115514	0.244678	2.49164	4.87751	-1.44705	2.21482	4.43982	2.61523	5.85882	1.55642	3.83561	2.88034	4.97117	1.74225	-4.67658	2.74869	-1.1781	2.46915	-4.08156	5.62155	2.99905	-0.55729	4.58237	-1.37272	4.83024	2.70712	3.32762	3.77569	6.72347	0.241488	2.94081
TCGA-EJ-A7NG-01A	-0.552999	3.32853	3.01515	5.46068	4.01982	8.13517	3.40147	4.04424	1.74204	2.86611	5.2115	-2.91546	3.40173	3.11974	3.39004	4.95873	3.0461	2.94037	0.153053	0.371056	2.5179	4.6016	-1.73748	2.10545	4.4386	2.58674	5.88033	1.5509	3.67023	2.24578	4.97557	0.518574	-5.90321	2.81725	-1.33407	2.06745	-3.79714	5.53998	3.19299	-0.0542018	4.26599	-1.73251	4.72248	2.43833	3.20663	3.52255	6.64935	0.419502	0.332753
TCGA-EJ-A7NH-01A	-0.483784	4.05901	2.93416	5.38932	4.29964	8.60199	3.69486	4.01548	1.77317	3.07366	5.26437	-2.78602	3.36369	3.08934	3.91778	5.10758	3.10237	3.57029	0.18942	0.587494	2.8658	4.80875	-1.57991	2.21373	4.48203	2.79782	5.86975	2.24458	3.90781	2.70922	5.08952	1.35589	-5.28843	2.83944	-1.23892	2.73746	-3.5524	5.54728	3.29129	0.0675349	4.44746	-1.48539	4.79126	2.79236	3.62158	3.64343	6.77047	0.92255	1.87948
TCGA-EJ-A7NJ-01A	-0.672285	3.88346	3.0766	5.45166	4.66417	8.7479	3.41286	4.29781	1.78053	3.34988	5.38625	-2.81875	3.6671	4.06951	3.90936	5.33837	2.99268	3.24011	0.704053	0.752176	3.18701	4.91584	-1.5753	1.89941	4.42705	3.05906	5.90487	2.50121	4.01058	2.61748	4.95074	1.95695	-5.0492	2.80284	-1.26327	2.96939	-3.3132	5.55143	3.34027	0.598125	4.22901	-1.70805	4.76147	2.68762	3.63064	3.68801	6.75172	1.33911	1.87896
TCGA-EJ-A7NK-01A	-0.619931	3.35737	3.03424	5.42	4.18124	8.31353	3.6363	4.0915	1.75915	2.9846	5.2357	-2.85599	3.51195	3.22205	3.34944	5.13501	2.96654	3.23504	0.283305	0.694484	2.92496	4.77014	-1.84859	1.79791	4.42368	2.71105	5.88327	2.17591	3.78105	2.22439	5.0185	1.20118	-5.68685	2.49429	-1.35871	2.28184	-3.52417	5.5389	3.08338	-0.0169415	4.13529	-1.80729	4.74202	2.25599	3.27606	3.52237	6.69886	0.728491	0.388579
TCGA-EJ-A7NM-01A	-0.862919	3.51149	2.91345	5.33265	3.80977	7.95778	3.69252	4.26361	1.78114	2.66616	5.04844	-2.82935	3.34588	2.81634	3.98146	4.17101	3.18981	4.12228	-0.288057	0.197899	2.05816	4.81325	-2.17499	2.29873	4.55261	1.9374	5.85938	0.668445	3.90682	2.68702	5.07939	0.0934172	-5.59859	2.34224	-1.28122	1.83237	-4.50578	5.61769	2.48382	-0.885114	4.34707	-1.74482	4.81321	2.37668	2.75654	3.6309	6.6751	-0.0304752	1.26512
TCGA-EJ-A7NN-01A	-0.821477	3.4705	3.03366	5.40126	4.38031	8.12457	3.56499	4.1287	1.78212	3.22521	5.34399	-2.79453	3.77425	3.6715	3.55836	4.95698	3.09262	3.78655	0.0895494	0.697679	2.9081	4.81353	-1.90604	2.49224	4.4342	2.97584	5.89347	2.40191	3.81701	2.39379	5.04414	2.251	-5.98026	3.24609	-1.30692	2.88576	-3.93868	5.5798	3.30159	0.348346	4.19082	-1.9019	4.79341	2.77783	3.40645	3.50298	6.70968	1.08363	0.866105
TCGA-EJ-A8FN-01A	-0.431163	3.93171	3.00036	5.46943	4.2327	7.95427	3.60385	4.11709	1.77429	3.06052	5.31654	-2.81483	3.68163	3.32923	4.13335	4.97596	3.07185	3.54434	0.614909	0.588864	2.49123	4.54626	-1.46465	2.09846	4.45933	2.84997	5.92641	2.11269	3.69257	2.42183	4.96746	0.702383	-5.46766	3.40562	-1.20482	2.45049	-2.52437	5.5718	3.24194	0.795734	4.29429	-1.44025	4.77678	2.96327	4.12519	3.693	6.64708	1.50743	1.95464
TCGA-EJ-A8FO-01A	-0.572647	3.72475	3.00485	5.47574	4.42675	8.93541	3.46241	4.11591	1.77385	3.24374	5.4681	-2.83325	3.45894	3.48374	3.74988	5.26501	3.10387	3.47022	0.465421	0.328178	2.81928	4.62841	-1.47223	2.24909	4.39562	2.8638	5.90394	2.11472	3.8863	2.70897	4.9485	1.45751	-5.15934	3.18037	-1.26139	2.49378	-3.12838	5.56286	3.27543	0.259161	4.44929	-1.47533	4.75527	2.83853	3.80561	3.71975	6.7337	1.06053	1.88099
TCGA-EJ-A8FP-01A	-0.66071	3.27808	3.04776	5.46006	4.10266	8.25733	3.50396	4.10144	1.74337	3.01147	5.24297	-2.92002	3.51481	3.08173	3.15611	4.90739	2.96672	2.94526	-0.0792489	0.540207	2.67855	4.5702	-1.80847	2.14893	4.41773	2.72278	5.90208	1.62417	3.63946	2.11693	4.93956	0.489843	-5.94958	2.60921	-1.35936	1.80896	-3.69373	5.52877	3.30143	-0.112474	4.08384	-1.94902	4.70771	2.02513	3.12521	3.52551	6.66606	0.626473	0.0825263
TCGA-EJ-A8FS-01A	-0.630039	4.23555	3.02059	5.44452	4.39152	8.15916	3.40167	4.18686	1.81795	3.40802	5.44939	-2.77196	3.62272	4.04973	4.74835	5.2359	3.14908	4.2371	1.09594	0.650622	2.79949	4.97834	-1.51464	1.83295	4.45088	3.01425	5.84671	2.59252	3.94816	2.96831	4.96855	3.05983	-4.53666	3.15097	-1.076	4.04536	-3.68981	5.59993	3.13614	0.938847	4.70671	-1.0061	4.84156	3.19168	3.67476	3.84481	6.75164	0.934859	3.21596
TCGA-EJ-A8FU-01A	-0.48941	3.5416	2.97508	5.45514	3.7908	8.39339	3.86644	4.02457	1.73983	3.03412	5.11938	-2.90968	3.3068	2.86766	3.38761	4.80187	3.07137	3.23232	-0.0188448	0.451035	2.48319	4.64621	-1.66438	2.46897	4.44315	2.50449	5.88557	1.71987	3.73134	2.35761	4.90925	0.516783	-5.71305	2.89892	-1.326	1.64238	-3.92246	5.53078	3.31791	-0.264766	4.25751	-1.67168	4.71611	2.37543	3.08738	3.59225	6.66578	0.346346	0.704698
TCGA-EJ-AB20-01A	-0.435116	2.33456	2.87701	5.44267	2.90048	8.19227	4.40948	3.42084	1.67662	2.81077	4.9397	-3.02157	3.05114	1.02651	2.30684	3.78588	3.02505	3.39378	-0.724717	0.216911	2.34704	4.37384	-1.86386	2.81023	4.50363	1.95985	5.90861	1.1617	3.17753	1.33944	4.93459	-1.73997	-7.1989	2.80897	-1.53959	0.673739	-5.01243	5.48529	2.86671	-1.2649	3.83883	-2.17598	4.674	1.59074	1.7393	3.21487	6.59584	-0.635626	-2.39818
TCGA-EJ-AB27-01A	-0.728777	3.58533	3.06092	5.46891	4.22353	8.16832	3.4434	4.24282	1.77511	3.33289	5.28635	-2.85738	3.5279	3.20886	3.83936	4.9602	3.03273	3.39142	0.300678	0.37379	2.71149	4.70691	-1.77302	1.97992	4.39752	2.63709	5.90691	1.92547	3.68066	2.27133	4.91112	1.09679	-5.68873	2.98614	-1.29704	2.18846	-3.72377	5.58847	3.17025	-0.0647585	4.11911	-1.7422	4.76853	2.57561	3.31613	3.64262	6.69707	0.641829	1.10448
TCGA-FC-7708-01A	-0.612361	3.40542	3.06569	5.47278	4.14383	8.07778	3.56553	4.23883	1.74345	3.04797	5.46506	-2.94194	3.36126	3.01528	3.31627	4.90864	3.01056	3.19902	-0.445279	0.487572	2.46409	4.45058	-1.6793	2.47161	4.39536	2.88974	5.9031	1.27793	3.70886	2.29529	4.90472	0.29485	-5.44772	2.72241	-1.27624	1.75735	-3.91173	5.56675	3.51858	-0.0447635	4.31835	-1.86962	4.69155	2.31608	3.23956	3.61971	6.68229	0.528152	0.577604
TCGA-FC-7961-01A	-0.912081	3.47853	2.94183	5.5435	4.1048	8.80775	2.99869	4.19619	1.76335	3.29756	5.48066	-2.85182	3.75474	3.45026	4.15549	5.01077	3.30711	3.24465	0.72412	0.254921	2.46134	4.70699	-1.57564	2.57706	4.44633	2.87788	5.94698	2.04501	3.75817	2.92417	5.05604	1.77727	-5.9487	3.67959	-1.10701	2.13349	-3.60641	5.56998	3.524	0.699416	4.04092	-1.94544	4.76473	3.11372	3.21248	3.74493	6.61172	1.01181	1.11898
TCGA-FC-A4JI-01A	-1.06238	4.66318	2.69581	5.38454	4.34225	8.52336	3.65669	4.5041	1.86856	3.81291	4.87513	-2.67086	3.44245	3.49643	5.3596	5.02653	3.59291	4.95847	0.12965	0.830366	1.85331	5.1681	-1.5881	1.6033	4.53183	2.10842	5.82156	-0.715552	4.32209	4.27459	5.04778	2.72169	-3.72013	2.79877	-0.804588	2.4318	-4.74447	5.75376	3.29584	1.09659	4.36299	-0.954797	4.95279	3.32276	2.28871	3.90391	6.7122	-0.108135	4.60972
TCGA-FC-A5OB-01A	-0.665512	4.44653	2.95386	5.57684	4.17447	8.32971	3.00584	4.36587	1.82632	3.89584	5.52835	-2.8383	3.60304	5.3943	4.89807	5.23262	3.34766	3.42052	1.77646	0.314157	2.58558	4.99935	-1.18569	1.95592	4.43254	2.84024	5.87405	1.92625	3.96104	3.75179	4.80435	2.99388	-4.01237	3.22958	-0.928546	3.49443	-3.41774	5.61367	2.99394	1.25318	4.74597	-0.981123	4.82074	3.63263	3.63752	4.02819	6.72777	1.86768	4.46379
TCGA-FC-A66V-01A	-0.798287	2.87716	3.16259	5.42229	4.2956	8.50437	3.70855	3.83712	1.7662	3.34538	5.41646	-2.84467	3.82541	3.37186	3.15386	5.00591	2.86912	3.81991	0.4891	0.442549	3.82259	4.80795	-1.93698	1.58337	4.47368	2.42323	5.92077	3.53873	3.44297	1.48529	4.97083	1.4293	-6.7579	2.73968	-1.49959	2.72732	-3.8843	5.59681	2.74793	-0.573315	3.77685	-2.06282	4.79631	2.15068	3.18033	3.44461	6.74074	0.601616	-0.279235
TCGA-FC-A6HD-01A	-0.690533	3.46329	2.99055	5.41084	3.91013	8.35275	3.44896	3.99288	1.82579	3.53671	5.51972	-2.75727	3.4324	3.56037	4.12331	5.01432	3.13381	4.65508	0.330596	0.276108	3.07315	4.95399	-1.59921	1.97122	4.50797	2.03836	5.88003	2.24672	3.44766	2.39189	4.89666	2.493	-5.79108	2.95342	-1.28447	2.97672	-4.4072	5.71247	2.55978	-1.12739	4.29137	-1.39102	4.90328	2.6188	3.22978	3.65707	6.75184	0.0844761	2.21884
TCGA-FC-A8O0-01A	-0.533691	3.27218	2.92155	5.39579	3.76324	8.16751	3.92542	3.94098	1.75022	2.84728	5.15897	-2.86675	3.49645	3.21761	3.50541	4.92151	3.07946	3.37438	0.213357	0.508919	2.73205	4.68487	-1.8361	1.81283	4.52333	2.64245	5.87496	1.50853	3.7958	2.4823	5.02886	1.16811	-5.71365	2.44007	-1.32031	2.60921	-3.94967	5.50726	2.78865	-0.047329	4.31035	-1.6766	4.75299	2.64291	2.88942	3.533	6.69897	0.805051	0.626372
TCGA-G9-6329-01A	-0.76582	2.81981	2.94808	5.48493	3.7782	8.3409	3.632	4.08906	1.75619	3.29169	5.47739	-2.90207	3.50421	2.96592	2.80804	4.66455	3.04728	3.59964	-0.245257	0.154944	2.91334	4.77729	-1.8366	2.31761	4.40236	2.34973	5.92558	1.46683	3.57452	2.04518	4.87023	0.0997382	-5.7507	3.24073	-1.34292	1.253	-4.13336	5.57138	3.4768	-0.704321	4.1662	-1.77577	4.75552	2.20472	2.6217	3.57722	6.69017	0.386432	-0.339424
TCGA-G9-6332-01A	-0.649447	3.62433	3.07382	5.49531	4.54763	8.58983	3.29149	4.26978	1.80441	3.2358	5.64684	-2.83197	3.46866	3.9199	3.78245	5.40136	3.1299	3.86118	0.0214402	0.403841	2.60061	4.61507	-1.43513	2.16611	4.37921	2.97279	5.88771	1.91181	3.79866	2.75861	4.93778	1.95614	-4.63338	2.85426	-1.21957	3.05557	-3.54024	5.62517	2.95487	-0.0412402	4.47114	-1.18147	4.80299	3.24674	3.52599	3.86001	6.68761	0.614711	2.36558
TCGA-G9-6333-01A	-0.689135	3.39615	3.1134	5.5069	4.22472	8.47586	3.56319	4.19746	1.76796	3.2776	5.61958	-2.87894	3.68108	3.34573	3.59453	5.17479	2.99527	3.23529	0.253154	0.410588	3.19945	4.53998	-1.4741	2.5092	4.33002	2.75375	5.92637	2.06283	3.79264	2.42993	4.9238	1.54168	-5.43479	3.42734	-1.40467	2.29611	-3.60781	5.57734	3.4664	-0.0831294	4.1918	-1.75241	4.75351	2.53932	3.3755	3.65425	6.70986	0.874381	0.84598
TCGA-G9-6336-01A	-0.821911	2.92769	3.1322	5.52401	4.46815	8.57048	3.43032	4.2532	1.77429	3.34115	5.66755	-2.89273	3.68438	3.44227	3.13442	5.25051	2.93943	3.31509	0.343642	0.412007	3.19718	4.72187	-1.68928	1.89471	4.31743	2.73798	5.94346	2.4621	3.67665	2.08633	4.86917	1.40579	-5.69533	3.11472	-1.42181	2.1691	-3.26374	5.60321	3.2161	-0.0520354	4.10004	-1.79768	4.742	2.29118	3.56151	3.66037	6.65257	1.02794	0.288559
TCGA-G9-6338-01A	-0.277603	3.23402	2.98642	5.48956	3.60753	7.71836	4.00672	3.90836	1.75335	3.44307	5.67863	-2.79349	3.79308	3.34037	2.41754	4.94941	2.94288	3.9506	0.321567	0.893512	3.62876	4.4884	-1.34033	2.70655	4.44458	2.71005	5.9628	3.27157	3.69969	2.08851	4.7772	0.848134	-5.44953	3.99225	-1.36943	1.86925	-1.86478	5.55049	3.82405	0.81971	3.74994	-1.77795	4.75773	2.50442	4.1821	3.54109	6.59112	2.12156	-0.0266095
TCGA-G9-6339-01A	-0.864685	3.1148	3.16751	5.47742	4.56237	8.27496	3.48182	4.22271	1.79347	3.13137	5.56605	-2.8778	3.64684	3.13087	3.33396	5.09953	2.9574	3.66576	0.178873	0.437227	2.98577	4.77378	-1.83983	1.89603	4.36355	2.63612	5.90607	1.77669	3.65657	2.11559	4.89592	1.7622	-5.74336	3.09199	-1.42151	2.67842	-3.77878	5.64185	3.15802	-0.176049	4.19583	-1.71615	4.7812	2.46827	3.28062	3.68848	6.65133	0.719245	1.12102
TCGA-G9-6342-01A	-0.678465	3.62026	3.04244	5.48564	4.62703	8.83321	3.39528	4.25915	1.78392	3.10229	5.64155	-2.84359	3.61245	3.54885	3.77894	5.31371	3.07357	3.48367	0.368739	0.570953	2.85841	4.65119	-1.5972	2.35341	4.39327	2.84964	5.91115	1.73405	3.91986	2.72576	4.95319	1.81486	-5.26712	3.25085	-1.28174	2.74686	-3.2106	5.59452	3.34413	0.245356	4.35177	-1.65553	4.76491	2.7469	3.96569	3.7504	6.71222	1.15952	1.82889
TCGA-G9-6343-01A	-0.587064	2.97234	3.14037	5.5013	4.13422	8.83328	3.50758	4.08589	1.77259	3.72777	5.95544	-2.8029	3.67192	3.50955	3.25201	5.25182	2.91555	3.79386	0.456934	0.399347	3.89454	4.48508	-1.27495	2.2585	4.32713	2.81154	5.99002	3.84188	3.53921	2.01404	4.90015	2.04997	-5.65459	3.70544	-1.42173	1.93442	-2.67828	5.62392	3.54027	-0.334774	4.00834	-1.85015	4.77749	2.52197	3.99122	3.62716	6.68361	1.36214	0.0426318
TCGA-G9-6347-01A	-0.490175	1.86758	3.14471	5.4362	3.47495	8.18568	4.40369	3.61935	1.70414	3.34512	5.66186	-2.91545	3.69734	1.88868	2.06494	4.30182	2.79038	3.85771	-0.0440315	0.298512	3.56054	4.50697	-1.79419	2.63354	4.50983	2.23328	6.00635	3.58047	3.07214	0.810992	4.83152	0.151773	-7.6108	3.65587	-1.66209	1.31327	-3.69916	5.59978	3.3063	-1.02555	3.55923	-2.3324	4.7372	1.70725	2.89883	3.0053	6.57092	0.380389	-3.00218
TCGA-G9-6348-01A	-0.770131	2.97149	3.18758	5.53355	4.11035	8.30434	3.78352	4.22622	1.75417	3.09093	5.66289	-2.98147	3.73438	2.75145	3.33026	4.73202	2.90915	3.75916	-0.0265002	0.179292	2.79187	4.52152	-1.7108	2.23349	4.3143	2.66314	5.93813	2.05185	3.5555	2.05452	4.80875	1.36486	-5.97009	2.95173	-1.39522	1.49787	-4.11336	5.63776	3.42251	-0.220617	4.1581	-1.73644	4.71002	1.86663	2.88131	3.70442	6.62497	0.334956	-0.15611
TCGA-G9-6351-01A	-0.714333	3.28657	3.11127	5.51519	4.46699	8.66602	3.35313	4.2017	1.77285	3.22967	5.70148	-2.86544	3.56031	3.28413	3.36968	5.27174	2.99706	3.42975	0.319893	0.2622	3.0166	4.4784	-1.54817	2.12746	4.32623	2.98663	5.94074	2.49368	3.69915	2.35469	4.92736	1.24076	-5.5508	3.32368	-1.32572	2.33943	-2.95875	5.58341	3.34449	0.200668	4.23171	-1.6448	4.75264	2.69106	3.51441	3.71637	6.68867	1.17005	1.09376
TCGA-G9-6353-01A	-0.579606	3.04927	3.08847	5.49344	4.23846	8.78933	3.72484	4.00484	1.74556	3.04026	5.62422	-2.87729	3.4924	2.985	3.04749	5.25998	2.97327	3.37964	0.108231	0.316421	3.18119	4.49862	-1.56869	2.33631	4.37039	2.76017	5.93875	2.86865	3.64314	2.04735	4.97191	0.938601	-5.83573	3.19249	-1.43737	2.03537	-2.86525	5.56651	3.41893	-0.186429	4.05686	-1.87599	4.73172	2.45793	3.63455	3.54823	6.66789	0.971959	0.0470042
TCGA-G9-6354-01A	-0.625048	3.5424	3.08218	5.45249	4.59366	8.86388	3.51835	4.14834	1.80234	3.46787	5.74276	-2.79436	3.65723	3.45157	3.75897	5.25308	3.00033	3.97619	0.213372	0.418492	3.46349	4.88937	-1.39806	2.28507	4.41053	2.72818	5.91693	2.06892	3.65951	2.35507	4.89183	1.84968	-5.36463	3.33976	-1.33712	2.84736	-3.6882	5.62045	3.40929	-0.394932	4.36577	-1.60913	4.80983	2.5282	3.79653	3.78349	6.74886	0.84542	1.83706
TCGA-G9-6356-01A	-0.746926	2.94705	2.98501	5.45347	4.08583	7.99623	3.64311	4.18033	1.75936	3.06528	5.32436	-2.91141	3.42262	2.84582	3.01305	4.72764	2.99538	3.43355	-0.549894	0.406436	2.38612	4.75119	-1.88997	2.23658	4.41647	2.50605	5.90884	1.6441	3.59072	2.06191	4.84984	0.0260814	-5.76951	2.60471	-1.32304	1.50216	-4.05885	5.56806	3.25133	-0.332398	4.18191	-1.73457	4.73978	1.98279	2.98901	3.52715	6.65712	0.354281	0.124376
TCGA-G9-6361-01A	-0.601978	3.18129	3.02788	5.48198	3.97349	8.35562	3.95125	4.14137	1.75704	2.87857	5.5826	-2.89932	3.42745	2.739	3.21199	4.81767	3.05466	3.98221	-0.29502	0.106461	2.50254	4.51079	-1.52136	2.48757	4.39243	2.71195	5.91108	1.56807	3.61196	2.39179	5.01475	0.108092	-5.54181	3.04444	-1.23637	1.77215	-3.67159	5.563	3.45392	-0.296475	4.26533	-1.61742	4.73108	2.60745	3.12507	3.67166	6.62491	0.561852	0.616812
TCGA-G9-6362-01A	-0.501699	3.50051	2.89102	5.45548	3.77054	8.90786	3.66221	4.13589	1.79945	3.7215	5.70475	-2.7817	3.44366	3.54104	3.34216	4.57938	3.10735	4.37722	-0.0381525	0.199435	3.30144	4.98749	-0.80811	2.75374	4.41668	2.8768	5.90272	1.7152	3.80478	2.83092	4.79274	1.48833	-4.24021	3.19238	-1.23986	1.53623	-4.21569	5.56807	3.38308	-0.720579	4.5303	-1.49331	4.794	1.91953	2.80487	4.0728	6.72271	0.61332	1.62412
TCGA-G9-6363-01A	-0.784692	3.19185	2.96361	5.5914	3.97447	8.25967	2.79006	4.21614	1.79522	3.49047	5.65243	-2.92229	3.67751	3.8566	3.99121	5.00938	3.18411	3.5874	0.380913	0.101453	2.66607	4.9743	-1.32127	2.39712	4.44272	2.55189	5.92261	0.792398	3.47849	2.55604	4.64445	1.23456	-5.70448	3.72512	-1.10968	2.11715	-4.43275	5.63767	3.3258	0.296983	4.36836	-1.40986	4.76764	2.70654	2.75415	3.81224	6.57772	0.214225	1.48727
TCGA-G9-6364-01A	-0.411617	3.116	2.98682	5.52019	4.2373	8.74587	3.52743	4.13716	1.74826	3.32726	5.70505	-2.87222	3.33587	3.36762	2.9449	5.22655	3.05434	3.17938	-0.0927207	0.435939	2.93616	4.57243	-1.20472	3.00426	4.37131	3.05781	5.94656	2.73572	3.76037	2.47291	4.83883	1.23632	-5.01611	3.56014	-1.2556	1.85396	-3.04455	5.53119	4.02215	0.421504	4.37913	-1.69855	4.71102	2.4823	3.49271	3.67603	6.64107	1.24359	0.705728
TCGA-G9-6365-01A	-0.649404	2.55711	2.9755	5.49329	3.38608	7.78508	3.63816	4.06227	1.74424	2.86083	5.45644	-2.9493	3.4244	2.63729	2.77308	4.42669	3.04477	3.3571	-0.369797	-0.0329994	2.49733	4.67097	-1.74762	2.12171	4.421	2.44898	5.92386	1.08041	3.44152	2.04036	4.86729	0.0626584	-5.77134	2.95261	-1.32721	1.27593	-4.24151	5.5722	3.33055	-0.506664	4.0744	-1.62297	4.71976	2.2527	2.59821	3.50041	6.602	0.0722939	-0.524005
TCGA-G9-6366-01A	-0.742831	3.76477	3.20599	5.50745	4.70029	8.69037	2.92757	4.19767	1.79253	3.41604	5.67123	-2.83822	3.58134	3.85951	3.68197	5.12194	3.02011	3.66207	0.712285	0.0445931	3.16048	4.57009	-1.37014	1.73602	4.30691	3.2676	5.91888	2.86333	3.83232	2.69773	4.89739	3.1279	-5.06776	3.12028	-1.22377	2.84882	-3.00706	5.60334	4.05421	1.15201	4.22641	-1.424	4.78249	2.89689	3.92816	3.78759	6.70994	1.43204	2.21206
TCGA-G9-6367-01A	-0.671472	2.75473	3.09205	5.52715	4.26694	8.60726	3.27722	4.09179	1.73859	3.26004	5.56834	-2.9055	3.65874	3.56826	2.75629	5.20133	2.94588	2.96777	0.386137	0.407374	3.32902	4.41544	-1.57453	1.99555	4.32532	2.99697	5.96787	2.75661	3.59555	2.04808	4.9448	1.1415	-5.97784	3.34007	-1.35048	1.95542	-2.89312	5.52879	3.45792	0.3558	3.98362	-1.90198	4.70304	2.56623	3.2114	3.5789	6.66224	1.37571	-0.724122
TCGA-G9-6369-01A	-0.663858	2.96069	3.10807	5.52762	4.23815	8.87542	3.22645	4.18077	1.79154	3.8014	5.98121	-2.78733	3.75309	3.49022	3.05074	5.46606	2.95896	3.88336	0.516907	0.237648	3.99669	4.55913	-1.22328	2.27313	4.28834	2.91908	5.99848	4.22963	3.58006	2.18997	4.93519	2.25199	-5.99506	3.90749	-1.38452	2.33953	-2.69362	5.61643	3.72908	0.445262	4.19325	-1.50609	4.80351	2.55194	3.82203	3.68665	6.69533	1.46686	0.20529
TCGA-G9-6370-01A	-0.757471	2.83394	3.04875	5.51218	4.11469	8.12037	3.35852	4.16936	1.7423	3.03195	5.2555	-2.94157	3.73925	3.60875	2.60772	4.93746	2.90938	3.26622	0.129949	0.445559	2.83018	4.63167	-1.89304	1.65126	4.35727	2.83123	5.93083	1.79953	3.72005	2.05271	4.89887	0.804301	-5.70434	2.7176	-1.37708	1.74334	-3.16724	5.52098	3.32816	0.520975	3.94616	-1.72401	4.68897	2.26682	2.82754	3.55635	6.69036	1.0092	-0.82782
TCGA-G9-6371-01A	-0.652004	3.3707	3.06741	5.53153	4.3464	8.80561	3.48086	4.30971	1.78346	3.27747	5.79901	-2.85961	3.38526	3.43941	3.72983	5.24417	3.10135	3.67716	0.186848	0.313	2.62982	4.4287	-1.49616	2.58582	4.32394	2.72569	5.93299	2.33693	3.72156	2.63854	4.91699	1.65601	-4.99552	3.3923	-1.22734	2.11584	-3.39867	5.62008	3.26016	0.0423004	4.34876	-1.37902	4.76984	3.01422	3.54563	3.75003	6.65839	0.868136	1.7744
TCGA-G9-6373-01A	-0.721001	3.04435	3.04099	5.47569	4.19998	8.36205	3.13795	4.11821	1.77091	2.93493	5.52218	-2.89867	3.6699	2.53236	3.17812	4.96161	3.02369	3.41834	-0.269061	0.155941	2.72665	4.61424	-1.4108	2.11905	4.37297	2.67825	5.91744	0.940106	3.53907	2.17049	4.86892	0.386103	-5.80199	3.50314	-1.30791	1.72086	-3.91698	5.59032	3.76688	-0.252313	4.27499	-1.52773	4.7495	2.2688	3.34718	3.59739	6.69274	0.406198	0.278136
TCGA-G9-6377-01A	-0.766339	3.44755	3.156	5.50206	4.60294	8.45129	3.68653	4.33078	1.78358	3.32293	5.79906	-2.90376	3.73612	3.04701	3.74356	5.15897	2.94944	3.74405	-0.232597	0.580929	2.8726	4.56078	-1.55942	2.35542	4.31128	2.61785	5.92746	1.6452	3.76346	2.28763	4.83136	1.28522	-5.17485	3.05954	-1.37479	1.9317	-3.47601	5.65179	3.61374	-0.108771	4.30447	-1.61095	4.74178	2.272	3.65979	3.70804	6.66636	0.775835	1.20033
TCGA-G9-6378-01A	-0.479426	3.08532	2.91753	5.49474	3.62361	8.24755	3.71833	3.97385	1.74676	3.21662	5.38595	-2.88231	3.28282	3.28449	3.05788	4.63787	3.11289	3.79316	-0.0684728	0.303951	2.90551	4.61562	-1.42533	2.42317	4.422	2.78966	5.92655	2.05253	3.68477	2.40017	4.87273	0.771803	-5.497	3.30389	-1.21475	1.65394	-3.6466	5.51916	3.37461	-0.000369217	4.38106	-1.37305	4.74708	2.7783	2.79536	3.60526	6.67171	0.860453	0.397919
TCGA-G9-6379-01A	-0.829401	2.38983	3.1776	5.36484	4.06773	8.13055	3.80694	3.79012	1.75671	3.23683	5.50938	-2.85343	3.71617	2.05118	2.8622	4.29126	2.75193	4.09769	-0.559602	0.17225	3.3106	4.82248	-2.14128	1.93874	4.50355	1.96557	5.94439	2.925	3.1898	0.955471	4.95586	0.431823	-7.55711	2.46954	-1.62908	1.62188	-4.65917	5.65213	2.73182	-1.51017	3.67181	-2.33001	4.81198	1.21851	2.93109	3.20723	6.68343	-0.210791	-1.64809
TCGA-G9-6384-01A	-0.605103	3.47589	3.01633	5.50273	4.32247	8.47436	3.15003	4.28119	1.76277	3.18058	5.41573	-2.89452	3.37813	3.54111	3.39594	5.08833	3.04289	3.37516	0.134574	0.460462	2.59932	4.47917	-1.45023	2.35448	4.33446	3.16284	5.90455	1.3436	3.84932	2.68118	4.87921	1.74112	-4.71926	3.00987	-1.23735	1.79543	-3.36631	5.56495	3.71739	0.524654	4.38213	-1.51632	4.70089	2.52939	3.43199	3.77121	6.67209	0.869741	0.9018
TCGA-G9-6385-01A	-0.697023	3.00011	3.03851	5.4998	4.29262	8.27817	3.38186	4.12486	1.75488	3.14054	5.45044	-2.88646	3.52011	3.5174	3.08978	5.19184	3.02672	3.17539	0.269092	0.350144	2.91342	4.46845	-1.70906	1.83784	4.3653	2.82569	5.93586	2.33961	3.666	2.24545	4.97229	1.3171	-5.72699	3.0506	-1.28832	2.15405	-3.34048	5.55203	3.2732	0.217284	4.13906	-1.7364	4.73328	2.66478	3.22187	3.56228	6.66655	0.973607	0.105878
TCGA-G9-6494-01A	-0.604836	3.50736	3.00244	5.52216	4.57153	8.93359	3.5571	4.29396	1.77766	3.58133	5.64331	-2.8236	3.69268	3.89055	3.58513	5.30676	3.14844	3.38697	0.470985	0.496562	3.09984	4.69883	-1.26698	2.45087	4.38799	3.04127	5.93271	2.91832	4.05349	2.99223	4.91319	2.23068	-4.5188	3.42865	-1.13865	2.84331	-2.81966	5.56423	3.80038	0.749637	4.34461	-1.43698	4.76372	3.20007	3.7581	3.7311	6.75999	1.72463	1.81265
TCGA-G9-6496-01A	-0.750337	2.88314	3.07149	5.46843	4.19151	8.72573	3.57159	4.24651	1.79155	3.57926	5.85059	-2.77747	3.79594	3.2386	3.5915	5.04133	2.97327	3.82314	0.148288	0.649803	3.59615	4.58628	-1.38268	2.36264	4.3619	2.78624	5.97946	3.0645	3.64673	2.23134	4.96542	2.10624	-5.62273	3.35696	-1.39879	2.04049	-3.17464	5.63971	3.34034	0.0283811	4.20206	-1.88052	4.78831	2.21305	3.76481	3.68989	6.65007	1.16975	0.388129
TCGA-G9-6498-01A	-0.585989	3.02843	3.05049	5.47517	3.75885	7.95203	4.08139	4.15765	1.7543	3.61092	5.57547	-2.91104	3.58781	2.44762	2.80673	4.70177	2.85929	4.17436	-0.368597	0.281014	3.29734	4.68509	-1.57589	2.57641	4.38131	2.31923	5.94459	2.01868	3.55699	1.684	4.75311	0.353846	-6.24472	3.20025	-1.44142	1.1283	-4.20353	5.62806	3.61859	-0.48167	4.09035	-1.9016	4.73176	1.60554	2.64381	3.56524	6.68065	0.313967	-0.785681
TCGA-G9-6499-01A	-0.766833	3.40653	3.15673	5.53451	4.31405	8.34463	3.32729	4.24783	1.78337	3.30763	5.67348	-2.90768	3.63936	3.29402	3.92437	5.26779	2.97996	3.55485	0.395792	0.184069	2.94058	4.67391	-1.60451	2.11729	4.35156	2.45865	5.92522	2.07413	3.6415	2.30038	4.7858	1.59644	-5.86078	3.31852	-1.37294	2.31555	-3.64637	5.65744	3.21772	0.0109353	4.29889	-1.49539	4.77168	2.32921	3.43288	3.6678	6.64494	0.573098	1.21636
TCGA-G9-7509-01A	-0.614743	3.49151	2.98041	5.49172	4.24237	8.60266	3.34359	4.14833	1.77768	3.1445	5.49896	-2.83307	3.33974	3.55133	3.59924	5.19017	3.16081	3.35561	0.381717	0.27762	2.64669	4.58868	-1.50461	2.42124	4.37181	2.88347	5.89932	2.029	3.8364	2.74277	4.98007	1.28893	-5.03045	3.35305	-1.2102	2.41513	-3.18882	5.55192	3.47826	0.243762	4.36208	-1.47828	4.76223	3.15779	3.62395	3.75945	6.70247	0.998711	1.74708
TCGA-G9-7510-01A	-0.76935	3.06218	3.14284	5.52263	4.31263	8.54984	3.41657	4.18336	1.75677	3.1514	5.64503	-2.91282	3.70793	2.91965	3.34562	4.98557	2.95229	3.2373	-0.026239	0.233037	2.93902	4.47688	-1.72571	2.27084	4.33349	2.64187	5.94177	2.08184	3.64779	2.1355	4.91571	1.09709	-5.98117	3.26755	-1.41425	1.87439	-3.30398	5.59924	3.66136	-0.203207	4.11388	-1.7401	4.72404	2.44776	3.53315	3.52139	6.67715	0.881567	-0.0110544
TCGA-G9-7519-01A	-0.698445	2.79782	3.10264	5.55911	4.37617	8.62642	3.59933	4.16015	1.7696	3.55549	5.79773	-2.8409	3.66768	3.53635	3.06987	5.32276	3.02157	3.5797	0.900103	0.270951	3.52431	4.64373	-1.47301	2.3773	4.34181	2.803	5.98707	3.37639	3.60338	2.19136	4.90169	1.65476	-5.90047	4.11077	-1.31016	2.48485	-2.39248	5.5876	3.58963	0.483467	4.12568	-1.58853	4.76571	3.06054	3.88507	3.61731	6.65705	1.80748	0.318738
TCGA-G9-7521-01A	-0.898181	3.54762	3.05839	5.54198	4.62286	8.57263	2.78633	4.48705	1.76738	3.37546	5.5154	-2.88615	4.07555	3.92907	3.61825	5.09436	3.14924	2.46127	0.584966	0.484521	3.0739	4.63692	-1.5755	2.35109	4.35025	2.66409	5.92991	1.26419	4.02187	2.9951	4.79989	1.42901	-5.15716	3.77088	-1.19075	2.20796	-3.14075	5.57527	4.36934	1.11272	3.89386	-1.8523	4.71719	3.29886	3.83686	3.72405	6.69323	1.98804	0.644641
TCGA-G9-7522-01A	-0.626196	3.36538	3.08323	5.53218	4.4155	8.80639	3.36436	4.21124	1.76095	3.1778	5.61693	-2.89395	3.54093	3.52126	3.29139	5.13604	3.03189	3.29431	0.285464	0.31112	2.88967	4.48651	-1.4502	2.37152	4.33216	2.85622	5.93317	2.14613	3.78013	2.4519	4.82754	1.18616	-5.32099	3.33446	-1.32376	2.14302	-3.13637	5.56387	3.48592	0.243889	4.34162	-1.61893	4.72057	2.69712	3.50056	3.7313	6.685	1.09682	0.97268
TCGA-G9-7523-01A	-0.430929	2.16634	2.98725	5.53651	3.13505	7.91978	4.24796	3.82629	1.68237	3.09416	5.35317	-3.01993	3.36534	2.13477	1.78808	4.05491	2.9492	2.85444	-0.431087	0.058638	2.58393	4.19752	-1.54194	3.08634	4.38911	2.57233	5.98946	1.61095	3.13815	1.38069	4.77594	-1.33774	-6.54462	3.6771	-1.41891	0.508859	-3.63993	5.50684	4.0973	-0.460925	3.87386	-2.16399	4.62518	1.92142	2.78863	3.3696	6.54444	0.520404	-2.5442
TCGA-G9-7525-01A	-0.605878	2.73375	3.13453	5.53296	4.21995	8.68884	3.64407	4.08463	1.76467	3.38137	5.79546	-2.87744	3.52364	3.08974	2.97555	5.21378	2.95194	3.77368	-0.0848475	0.275632	2.83697	4.49067	-1.35686	2.29604	4.33299	2.82658	5.96696	3.04208	3.43262	1.85601	4.851	1.64125	-5.7411	3.22333	-1.39053	2.06993	-3.82524	5.60511	3.31099	-0.535047	4.18655	-1.73476	4.72943	2.29042	3.67948	3.67109	6.59256	0.262588	0.331909
TCGA-G9-A9S0-01A	-0.91591	3.97032	3.1388	5.47027	4.7916	7.58538	3.17276	4.28387	1.81658	3.48124	5.38972	-2.82566	3.75439	3.39662	4.49765	5.03075	3.0911	3.66638	0.489847	0.428408	2.51246	5.13793	-1.74722	1.91147	4.44206	2.62855	5.87817	1.94333	3.78022	2.44352	4.93576	1.50269	-5.40569	3.30718	-1.19629	3.71691	-4.2725	5.70453	3.04951	0.943032	4.1982	-1.66091	4.83396	2.53418	3.55061	3.56828	6.6676	0.360888	2.61869
TCGA-G9-A9S4-01A	-0.494375	4.19989	2.72109	5.32322	4.35211	8.76728	3.36162	3.9271	1.82152	3.19573	5.311	-2.6854	3.09583	3.37631	4.53642	4.8598	3.33377	3.98134	-0.27737	0.502744	2.90673	5.42252	-1.37114	2.50434	4.53902	2.05663	5.80282	1.62896	4.18644	3.26638	5.04782	1.52039	-4.62566	3.07087	-1.17594	2.76175	-4.33534	5.59908	3.06813	-0.0360917	4.69895	-1.36344	4.8819	2.92869	3.13401	3.79576	6.79511	0.26152	2.86917
TCGA-G9-A9S7-01A	-0.735655	3.87639	2.94229	5.39967	4.65061	8.51189	3.48578	4.21611	1.81812	3.01992	5.40074	-2.77546	3.57349	3.25743	4.27808	5.12498	3.17161	3.88168	-0.10035	0.477028	2.56695	5.11161	-1.58421	2.13257	4.48593	2.67366	5.85881	0.768252	3.91247	2.89358	4.99401	1.51221	-4.94694	2.97346	-1.1824	3.65448	-3.99256	5.62987	3.23646	-0.165235	4.54494	-1.36262	4.83776	2.89442	3.61009	3.78671	6.76038	0.428019	2.75291
TCGA-H9-7775-01A	-0.569934	3.37923	3.00929	5.49063	4.32831	8.48438	3.3214	4.18601	1.775	3.1284	5.57132	-2.86098	3.43274	3.58251	3.52782	5.17556	3.1109	3.40095	0.204795	0.353379	2.46234	4.69526	-1.51915	2.33785	4.39105	3.06921	5.89672	1.97926	3.72095	2.66186	4.91241	1.22874	-4.88465	3.06343	-1.14058	2.54469	-3.56125	5.58211	3.5713	0.397648	4.4472	-1.46011	4.74702	2.85409	3.37272	3.75349	6.65776	0.762753	1.77567
TCGA-H9-A6BX-01A	-0.605921	2.69643	2.99053	5.44855	3.54562	7.98473	3.88522	3.86865	1.6949	2.81127	5.10913	-3.00608	3.34746	2.1669	2.69319	4.58876	2.99895	2.78832	-0.20773	0.488262	2.36065	4.41739	-2.05629	2.36641	4.46842	2.31298	5.91754	1.14977	3.40742	1.66748	4.92749	-0.651975	-6.7746	2.88869	-1.46167	1.31369	-3.95985	5.51363	3.12608	-0.322116	3.82151	-2.26633	4.66778	2.08072	2.78107	3.2555	6.58104	0.261051	-1.58529
TCGA-H9-A6BY-01A	-0.638352	2.89361	3.01918	5.41301	3.89472	8.5254	3.74808	3.83453	1.79042	3.10215	5.7151	-2.78394	3.31182	2.42823	3.46796	4.88601	3.07254	4.44683	-0.229801	0.183678	2.70027	4.78941	-1.74076	2.29263	4.41881	2.30729	5.90663	2.14041	3.43052	1.99839	5.01636	1.04478	-5.86509	2.88322	-1.3442	2.204	-4.11723	5.67196	2.96611	-1.19825	4.16168	-1.71099	4.84069	2.56593	3.38969	3.54075	6.67377	-0.173454	0.787938
TCGA-HC-7075-01A	-0.592869	4.02022	3.08016	5.48422	4.38839	8.15594	3.44392	4.36903	1.80183	3.49692	5.51294	-2.81148	3.54007	3.99495	4.26494	5.2636	3.06827	3.98933	0.652651	0.56229	2.68947	4.60818	-1.38617	1.91172	4.37065	3.09715	5.91233	2.66656	3.8981	2.90711	4.95145	2.73376	-4.70339	3.13558	-1.12418	3.10908	-3.30601	5.61476	3.34729	0.732589	4.64602	-1.06438	4.79282	3.14549	3.50328	3.82733	6.71158	1.17967	2.67892
TCGA-HC-7077-01A	-0.70426	3.97424	3.09735	5.46044	5.17598	8.68151	3.24003	4.30627	1.81209	3.18905	5.75352	-2.78844	3.47478	3.81715	4.28093	5.52725	3.13367	3.60507	0.479272	0.718536	2.68114	4.70925	-1.6359	2.13919	4.36566	3.15079	5.90247	2.03732	4.06285	3.13572	5.0374	2.85977	-4.40107	3.27741	-1.12826	3.74586	-2.97109	5.66723	3.56407	0.962813	4.50535	-1.43226	4.80871	3.2014	3.98689	3.75886	6.717	1.711	3.30907
TCGA-HC-7078-01A	-0.54402	3.70002	2.97655	5.43492	4.16679	8.23538	3.29233	4.15828	1.78255	3.1079	5.56267	-2.80668	3.56849	2.38885	3.60227	4.84357	2.97454	3.40454	-0.146713	0.459242	2.63253	4.87105	-1.28734	2.08368	4.38491	3.01226	5.91939	1.98432	3.76964	2.46787	4.92393	0.955338	-5.29753	2.92104	-1.23222	2.22147	-3.43825	5.57573	3.64045	-0.264121	4.58905	-1.23082	4.78121	1.92851	3.76621	3.665	6.75388	0.951733	1.2314
TCGA-HC-7079-01A	-0.842034	3.64994	3.0735	5.34659	3.90722	6.46597	3.36013	4.49188	1.72222	3.22884	4.61949	-3.03826	3.40761	1.43504	3.43152	3.89074	2.69905	2.83786	-1.54552	0.573878	1.54114	4.64192	-2.51867	2.36389	4.54132	2.03953	5.88319	-0.29075	3.36252	1.28502	4.75983	-1.63645	-6.7257	1.25546	-1.44881	0.792009	-5.90149	5.5979	3.0988	-1.48694	3.51175	-2.68157	4.68144	0.374772	1.94285	3.20343	6.65433	-0.870973	-1.21509
TCGA-HC-7080-01A	-0.492	4.474	3.04454	5.3978	4.54318	8.60103	3.81353	4.07484	1.80226	3.01957	5.49534	-2.77434	3.62903	3.58037	4.88582	5.02517	3.14725	4.31246	0.720322	0.194783	2.58712	4.73125	-1.29894	2.31103	4.39988	2.74395	5.8501	2.92893	4.11767	3.23496	5.08056	2.57549	-4.49667	2.91461	-1.17903	3.86999	-3.52431	5.61565	3.13658	0.419749	4.79905	-1.2628	4.83809	3.13519	4.28494	3.85842	6.82249	1.27407	3.98808
TCGA-HC-7081-01A	-0.408563	3.07344	3.0211	5.49105	4.36322	8.65623	3.33142	4.2572	1.74266	3.1117	5.75805	-2.88306	3.44812	2.88596	2.8084	5.15076	2.98253	3.07312	-0.296523	0.395648	2.63881	4.56059	-1.29002	2.84175	4.35921	3.05896	5.96838	2.32522	3.81307	2.2778	4.87947	0.560133	-4.97253	3.24034	-1.28341	1.63857	-3.11592	5.58395	4.29899	0.06774	4.36787	-1.77447	4.67498	2.20679	3.74001	3.65319	6.61601	0.936652	-0.0812572
TCGA-HC-7209-01A	-0.621782	3.62147	3.12061	5.47922	4.52425	8.90899	3.04325	4.44201	1.7814	3.19823	5.75171	-2.87455	3.6283	3.64314	3.86126	5.43415	2.95236	3.45362	0.0736192	0.632614	2.6523	4.60191	-1.32059	2.24694	4.32482	3.09256	5.9283	1.70408	4.0679	2.79217	4.84471	2.21971	-4.48569	2.82307	-1.26944	2.11156	-3.28269	5.61015	3.36662	0.547009	4.53262	-1.52249	4.72687	2.26594	3.79555	3.81127	6.68612	0.984034	1.7099
TCGA-HC-7210-01A	-0.486026	3.7907	3.05032	5.54535	4.28404	9.01831	3.36556	4.24479	1.74802	3.36289	5.64196	-2.88057	3.55017	3.95882	3.45561	5.15024	3.00815	3.16226	0.0940885	0.401087	3.05308	4.3358	-1.09957	2.86487	4.27262	3.21646	5.96488	2.7789	4.13152	2.93753	4.84567	1.56045	-4.30067	3.32755	-1.25831	1.57951	-2.88491	5.54756	3.83805	0.30495	4.36988	-1.81959	4.69084	2.48792	3.62152	3.70865	6.77121	1.31727	0.99562
TCGA-HC-7211-01A	-0.68474	4.28874	3.00968	5.50276	4.46286	8.17213	3.08242	4.44861	1.7896	3.47874	5.35656	-2.88231	3.47433	4.28795	4.09636	5.27674	3.10313	3.27063	0.446187	0.645286	2.39204	4.63787	-1.57362	2.10525	4.35816	2.77862	5.87701	0.978497	4.17768	3.28065	4.8143	1.83685	-4.10633	2.95201	-1.16347	2.2262	-3.79172	5.58637	3.22444	0.723725	4.51873	-1.47041	4.74369	2.76785	3.41375	3.86702	6.76477	1.23767	2.51994
TCGA-HC-7212-01A	-0.505065	4.2091	2.86679	5.48432	4.43378	9.40417	3.34312	4.44622	1.80071	3.21001	5.56882	-2.80588	3.2678	3.73679	4.12536	5.318	3.25647	3.95631	-0.240604	0.461817	2.35992	4.67995	-1.23406	2.77594	4.37637	2.87927	5.87907	1.44008	4.31917	3.73607	4.94712	1.91004	-3.27477	3.24823	-1.05305	2.15482	-3.09632	5.60276	3.57544	0.276084	4.72642	-1.01724	4.77246	3.20224	3.73591	3.89626	6.72586	0.948723	3.46644
TCGA-HC-7213-01A	-0.984259	3.46172	2.90096	5.47073	4.81532	8.47621	3.13234	4.2448	1.80678	3.3192	5.5071	-2.78505	3.68972	3.08997	4.06494	5.11012	3.23647	3.41646	-0.0482099	0.364674	2.64976	5.00759	-1.77316	2.19077	4.45287	2.45415	5.92379	1.22475	3.85846	2.65425	5.00776	1.2563	-5.83369	3.67788	-1.1782	2.36307	-3.30295	5.64933	3.64534	0.439152	4.21688	-1.85361	4.80544	2.8617	3.45427	3.68969	6.70758	0.925883	1.19025
TCGA-HC-7230-01A	-0.560772	4.33275	2.92958	5.50388	4.77151	8.77117	3.37262	4.29798	1.8124	3.16227	5.55428	-2.8046	3.28346	3.77186	4.33248	5.35237	3.27332	3.79811	0.478213	0.451714	2.35341	4.74228	-1.42501	2.1678	4.37913	2.53981	5.87975	1.31506	4.21595	3.50804	4.99491	2.16523	-4.28471	3.66545	-1.15121	2.40357	-2.91604	5.65073	3.17804	0.664532	4.71366	-1.04221	4.78461	3.30146	4.00002	3.80065	6.75115	1.30506	3.34762
TCGA-HC-7231-01A	-0.653172	3.86682	3.00428	5.4544	4.56041	8.19803	3.1553	4.35695	1.79343	3.29741	5.53874	-2.842	3.5159	3.69061	3.77115	5.10487	3.08901	3.75013	-0.140983	0.335924	2.47713	4.77364	-1.50973	2.05783	4.39836	2.90662	5.9014	1.95383	3.99717	2.89002	4.88476	1.39793	-4.56378	2.78819	-1.14752	2.34907	-3.82092	5.60456	3.58444	0.295345	4.60774	-1.31908	4.77465	2.69176	3.3954	3.78509	6.72916	0.72402	2.19977
TCGA-HC-7232-01A	-0.459751	4.01265	2.95818	5.50709	4.27617	8.97582	3.44681	4.25543	1.77092	3.04011	5.55558	-2.85216	3.51649	3.93179	3.69136	5.34383	3.18786	3.87078	0.248477	0.359636	2.81999	4.59513	-1.1183	2.55594	4.3735	3.05151	5.90335	2.51665	4.24525	3.36773	4.90225	1.68949	-4.19414	3.03927	-1.13408	2.72972	-2.86839	5.54051	3.28654	0.525876	4.753	-1.21659	4.75432	3.23892	3.38086	3.89238	6.74063	1.18761	2.35679
TCGA-HC-7233-01A	-0.63844	3.50702	3.10158	5.50074	4.23876	7.83794	3.26585	4.42698	1.76799	3.13519	5.45284	-2.93957	3.32527	2.93296	3.79497	4.92837	2.97188	3.22456	-0.336357	0.597369	2.03695	4.65551	-1.67463	2.50789	4.3903	2.94553	5.91705	1.31638	3.6032	2.34068	4.77107	0.737472	-5.38613	3.03116	-1.19173	1.59479	-3.98836	5.62231	3.81124	0.214588	4.30653	-1.47553	4.70963	2.14162	3.10093	3.58523	6.57254	0.444797	1.12715
TCGA-HC-7736-01A	-0.713748	3.88526	2.99946	5.49093	4.30155	8.01652	3.30532	4.36148	1.78106	3.06944	5.18905	-2.86153	3.4161	3.99714	4.04399	4.7676	3.07717	3.4834	0.240631	0.484922	2.28466	4.57003	-1.73655	1.98691	4.35709	2.7491	5.87522	1.32687	3.92837	2.81968	4.92463	1.03707	-4.88957	2.52425	-1.22165	1.74425	-3.4189	5.57959	3.26826	0.479068	4.34946	-1.49561	4.74234	2.54794	3.33096	3.65051	6.71236	0.794013	1.64002
TCGA-HC-7737-01A	-0.585996	3.6783	3.09626	5.51597	4.16488	8.25732	3.55978	4.35437	1.7571	3.23371	5.45183	-2.92045	3.67143	3.18388	3.65535	5.03572	2.91914	3.32785	0.115095	0.391073	2.69135	4.4585	-1.44895	2.45769	4.30425	2.8437	5.94078	1.96789	3.84196	2.47586	4.83501	1.01885	-5.13916	2.97291	-1.35127	1.64269	-3.43474	5.6011	3.66077	0.0736887	4.2094	-1.71355	4.70359	2.22512	3.54105	3.70907	6.72232	0.96339	0.617102
TCGA-HC-7738-01A	-0.591858	3.7716	2.97794	5.47765	4.17112	8.46016	3.13852	4.31506	1.79907	3.33034	5.56952	-2.79154	3.41145	3.98892	4.0961	5.24502	3.16649	3.43632	0.595632	0.525179	2.49873	4.77917	-1.48319	2.31507	4.40412	2.89243	5.90285	2.67802	3.91796	3.01318	4.91581	1.65842	-4.4683	3.23183	-1.1181	2.55658	-3.05132	5.60704	3.35678	0.651156	4.52162	-1.29491	4.80037	3.10197	3.74192	3.72943	6.68322	1.31311	2.51471
TCGA-HC-7740-01A	-0.660384	2.80373	3.0908	5.50068	4.20013	8.14465	3.51072	4.19397	1.73945	3.11077	5.48282	-2.91429	3.63572	3.02126	2.58224	5.12095	2.84895	3.18621	-0.118383	0.4915	3.16049	4.45137	-1.84319	2.12501	4.31415	2.90014	5.95561	2.40765	3.70068	1.96934	4.96115	0.894256	-5.75817	2.959	-1.44355	1.54997	-3.13411	5.53981	3.67661	0.144426	3.9943	-1.89506	4.68301	1.97181	3.00268	3.52107	6.66532	1.04287	-1.1266
TCGA-HC-7742-01A	-0.79692	3.05159	2.99665	5.52106	4.64146	9.05054	3.05756	4.20422	1.77435	3.42326	5.54286	-2.81239	3.85534	3.45251	3.47266	5.2862	3.18801	2.85847	0.361559	0.613569	3.44044	4.54505	-1.6057	2.12106	4.39317	3.06952	5.96393	2.14273	3.86211	2.78456	4.98143	2.03618	-5.50298	3.88111	-1.19962	2.30512	-1.99368	5.59356	4.03055	0.921691	4.07899	-1.79461	4.73465	2.95038	4.18448	3.60479	6.6827	2.058	0.722075
TCGA-HC-7744-01A	-0.633135	3.59056	2.92923	5.47653	4.40945	8.44334	3.20509	4.3462	1.80997	3.26878	5.68928	-2.80543	3.37456	3.61	3.96531	5.30019	3.21205	3.63586	-0.0366879	0.399467	2.28179	4.92923	-1.45871	2.30192	4.41415	2.79326	5.89297	2.24044	3.93241	3.03047	4.91927	2.1364	-4.57234	3.20812	-1.04407	2.4224	-3.68143	5.6525	3.42084	0.546974	4.57929	-1.32239	4.789	2.87184	3.65183	3.72518	6.64777	0.673743	2.60918
TCGA-HC-7745-01A	-0.651308	3.18196	3.02369	5.43072	3.89197	7.89325	3.4766	4.16666	1.7475	2.94115	5.22513	-2.91589	3.37405	2.61888	3.07517	4.65954	2.92859	3.08534	-0.733006	0.613268	2.49379	4.73559	-1.82819	2.21596	4.43453	2.90786	5.89337	1.35698	3.56049	1.99633	4.92957	0.239521	-5.82024	2.41767	-1.3	1.44415	-4.2664	5.55497	3.58272	-0.437949	4.11676	-1.75876	4.71935	1.69634	2.87979	3.4798	6.64483	0.0017423	-0.119258
TCGA-HC-7747-01A	-0.765189	3.38074	3.06884	5.46734	4.27504	8.19218	3.40121	4.24601	1.77634	3.2807	5.50176	-2.88581	3.62644	3.42993	3.55776	5.02024	2.95834	3.42609	-0.127648	0.320719	2.81713	4.89824	-1.71993	1.9742	4.39763	2.72609	5.91773	1.94846	3.63795	2.18265	4.85981	0.842496	-5.62569	2.79252	-1.26027	2.12608	-3.97781	5.58944	3.24383	0.00438205	4.21246	-1.62054	4.76639	2.28019	3.12178	3.63399	6.69702	0.590873	0.781344
TCGA-HC-7748-01A	-0.620143	3.61472	2.9926	5.4894	4.25112	8.16563	3.16859	4.41834	1.76985	3.14976	5.42819	-2.88076	3.42037	3.62635	3.45688	5.23979	3.07282	2.98706	0.0496211	0.479049	2.39181	4.55868	-1.61381	2.41815	4.36667	3.10568	5.91106	1.29243	3.96832	2.80343	4.90172	0.846593	-4.58331	3.16738	-1.14627	1.84474	-3.33601	5.54551	3.78111	0.42689	4.39047	-1.48794	4.71559	2.63278	3.33798	3.72658	6.67431	0.953062	1.35509
TCGA-HC-7749-01A	-0.692529	3.49053	3.05238	5.49519	4.37405	8.2889	3.34185	4.31398	1.77864	2.94323	5.5656	-2.89445	3.50233	3.38613	4.00744	4.97545	3.08826	3.59231	0.206082	0.314532	2.42691	4.59806	-1.6167	2.37122	4.38178	3.00673	5.89723	1.82496	3.70501	2.61144	4.93662	1.0928	-5.1945	2.99314	-1.16783	2.57853	-3.58561	5.58664	3.54322	0.597437	4.39796	-1.42843	4.7558	2.58143	3.48155	3.68446	6.65821	1.04613	1.80347
TCGA-HC-7750-01A	-0.544113	2.99871	3.04798	5.50993	4.00774	8.22637	3.43342	4.08678	1.74548	3.17402	5.62891	-2.88789	3.46212	3.15569	3.02111	5.14091	3.00394	3.27819	0.183508	0.377588	2.9179	4.49183	-1.55265	2.23214	4.3544	2.92555	5.95261	2.69154	3.58601	2.1572	4.9215	0.828016	-5.54173	3.2983	-1.31989	1.90356	-2.71718	5.56806	3.60296	0.315959	4.17295	-1.75304	4.71651	2.61139	3.38119	3.50309	6.62602	1.21909	-0.137518
TCGA-HC-7752-01A	-0.0510977	3.48207	2.94564	5.27481	3.79017	8.20593	3.52305	4.07647	1.7829	3.66857	5.77996	-2.65075	3.2302	2.93955	2.65658	5.15761	2.79474	4.30645	-0.717298	1.02284	3.9174	4.7074	-0.79289	2.28459	4.38036	3.23762	5.9558	4.17618	3.92548	2.17293	4.9773	1.94663	-4.83379	2.61678	-1.33529	1.70157	-3.17946	5.55499	4.06897	-0.607041	4.58459	-1.66312	4.82118	1.42475	3.717	3.68935	6.75486	1.1011	0.0674765
TCGA-HC-7818-01A	-0.663414	3.71319	3.07313	5.48047	4.45404	8.24452	3.2628	4.31198	1.77738	3.14135	5.52297	-2.87279	3.33773	3.22138	3.82979	5.10471	3.01871	3.36558	-0.0975695	0.481406	2.42042	4.67732	-1.66591	2.23571	4.36556	2.721	5.90598	1.82388	3.79811	2.55724	4.88839	1.25772	-5.04509	2.86586	-1.25506	2.00808	-3.47807	5.6146	3.34402	-0.0652277	4.34721	-1.66939	4.74312	2.48214	3.5444	3.6715	6.66835	0.57835	1.75547
TCGA-HC-7819-01A	-0.639599	4.14503	2.97061	5.47112	4.48723	8.838	3.2388	4.32086	1.80327	3.21805	5.58818	-2.81534	3.22624	3.96016	4.23584	5.32327	3.21954	3.96412	0.103709	0.456028	2.37745	4.66306	-1.47724	2.45309	4.38266	2.90043	5.87445	1.82049	4.04034	3.3142	4.95251	2.11379	-4.17039	3.02359	-1.12475	2.47957	-3.64377	5.59903	3.34529	0.287704	4.61802	-1.26328	4.79194	3.17837	3.68315	3.83847	6.71407	0.726086	3.51837
TCGA-HC-7820-01A	-0.610393	3.95064	3.07766	5.45922	4.68873	8.62003	3.38056	4.19332	1.79277	3.13158	5.57294	-2.81792	3.46206	3.54244	4.17714	5.27037	3.07208	3.6939	0.352037	0.509641	2.6652	4.68187	-1.55203	2.09986	4.38284	3.08672	5.89045	2.20243	3.87935	2.79049	4.98257	2.01447	-4.87128	3.00437	-1.2149	2.87679	-3.45829	5.59639	3.486	0.614618	4.51484	-1.35757	4.7795	2.85002	3.6441	3.75554	6.69086	1.02319	2.58339
TCGA-HC-7821-01A	-0.553456	3.96459	2.98563	5.46427	4.49236	8.71685	3.31163	4.20795	1.75718	3.03208	5.509	-2.87951	3.18352	3.01186	3.67994	4.99703	3.16858	3.37121	-0.640028	0.51974	2.3371	4.58849	-1.34291	2.85099	4.4209	2.90546	5.89044	1.00701	3.88986	2.78528	4.99619	0.255565	-5.04546	3.0085	-1.19657	1.95799	-3.95899	5.55744	3.62277	-0.411902	4.4968	-1.71844	4.74147	2.39397	3.49367	3.62109	6.75462	0.491459	1.98616
TCGA-HC-8213-01A	-0.469591	4.15002	3.00187	5.48192	4.27104	8.15755	3.29914	4.321	1.8191	3.18502	5.5715	-2.83731	3.35758	3.89332	4.40111	5.0608	3.11119	4.0583	0.311844	0.353818	2.32145	4.92183	-1.27466	2.01675	4.4079	3.02571	5.86438	1.12736	3.80755	3.07965	4.77483	1.89954	-4.09455	2.78638	-1.05127	2.57538	-4.04018	5.61618	3.30966	0.378815	4.84353	-0.773235	4.791	2.75399	3.2553	3.98231	6.69284	0.570741	3.68813
TCGA-HC-8216-01A	-0.812771	3.50838	2.9833	5.4631	4.09104	8.02483	3.06158	4.34351	1.79341	3.17528	5.14172	-2.87358	3.60176	3.77864	4.16983	4.54943	3.17036	3.15605	0.259391	0.271334	2.41822	5.05441	-1.6619	1.8174	4.49751	2.56897	5.87857	0.70374	3.68027	2.69102	4.79	1.65143	-5.33984	3.10068	-1.11008	2.05922	-4.45061	5.60428	3.41239	0.269927	4.28707	-1.37525	4.78873	2.7209	3.05966	3.74086	6.67042	0.399913	1.69933
TCGA-HC-8256-01A	-0.645356	3.9951	3.03968	5.47225	4.60772	8.41967	3.44275	4.32435	1.80511	3.26331	5.50209	-2.80965	3.41804	3.77723	4.3871	5.27395	3.13601	3.9071	0.504341	0.613978	2.55955	4.69465	-1.53355	2.04365	4.40963	2.91601	5.89143	2.15803	3.85962	2.94119	4.96423	2.26303	-4.92799	2.94682	-1.10667	3.23812	-3.41126	5.62044	3.31549	0.546994	4.56566	-1.19491	4.79405	2.99118	3.84728	3.73851	6.6952	1.12216	2.86871
TCGA-HC-8257-01A	-0.29247	4.34956	2.85318	5.40443	3.90733	8.07468	3.89852	4.04349	1.79155	3.21696	5.27542	-2.81968	3.08957	3.62889	4.1945	4.72725	3.22791	4.43646	-0.292943	0.363261	1.98213	4.89552	-1.27443	2.35902	4.49085	2.53191	5.82326	1.80234	3.89732	2.93644	4.86736	0.941868	-4.5162	2.386	-1.07725	2.29179	-4.7641	5.57757	3.0605	-0.157503	4.99293	-0.866969	4.81324	2.84938	3.09314	3.8093	6.75294	0.0107222	3.49967
TCGA-HC-8258-01A	-0.758269	3.54285	3.10766	5.47399	4.33719	8.25128	3.46191	4.21481	1.78144	3.20105	5.33234	-2.8502	3.71544	3.3971	3.90631	5.07765	2.97851	3.4581	0.691812	0.332614	2.99944	4.69587	-1.87167	1.87781	4.3816	2.59495	5.90146	2.76884	3.7984	2.34408	4.986	1.49964	-5.80917	2.96288	-1.38982	2.61377	-3.60509	5.58672	3.05118	0.174086	4.19911	-1.55615	4.77347	2.53584	3.33481	3.67209	6.71379	0.852298	0.958975
TCGA-HC-8259-01A	-0.574665	3.79094	2.97912	5.45391	4.41526	8.65012	3.509	4.21077	1.80158	3.11968	5.46464	-2.7916	3.37529	3.55163	4.06133	5.23495	3.19163	3.97667	0.592781	0.416391	2.35071	4.69438	-1.52956	2.13461	4.40386	2.75514	5.88119	2.1384	3.88529	2.90164	4.96059	1.73154	-4.80926	3.15304	-1.15813	2.84273	-3.29293	5.60389	3.20504	0.401139	4.58348	-1.17198	4.80586	3.21503	3.6637	3.82613	6.69694	0.909574	2.62352
TCGA-HC-8260-01A	-0.622238	3.86068	2.98829	5.43417	4.23659	8.35344	3.5473	4.13929	1.7749	3.0606	5.09757	-2.86012	3.47472	3.2939	3.82364	4.88274	3.08345	3.44767	0.422762	0.490163	2.5083	4.74377	-1.73755	1.83866	4.46315	2.55418	5.86154	1.56475	3.78812	2.55797	4.96704	0.655122	-5.55733	2.50702	-1.21999	2.46672	-4.11096	5.55702	3.08653	0.0190242	4.37532	-1.50823	4.76706	2.59956	3.28097	3.74119	6.71567	0.60654	1.88753
TCGA-HC-8261-01A	-0.556291	3.82646	2.99515	5.43886	4.21869	8.13358	3.36507	4.21159	1.78832	3.26025	5.36221	-2.79879	3.51008	3.28779	4.04151	5.01363	3.08204	3.65108	0.014948	0.349906	2.81607	4.73959	-1.46272	1.95543	4.44836	2.53665	5.90578	2.57943	3.84405	2.64508	4.93671	1.59183	-5.12769	2.67982	-1.23025	2.71995	-3.97506	5.60554	3.17894	-0.147499	4.47662	-1.29272	4.80627	2.60563	3.11616	3.67363	6.72834	0.506886	1.59346
TCGA-HC-8262-01A	-0.568486	3.99209	2.91675	5.44899	4.31389	8.21663	3.63315	4.18657	1.80905	3.13258	5.4897	-2.80524	3.4807	3.45838	4.10661	5.20447	3.14912	4.1339	0.384768	0.696356	2.40725	4.97553	-1.63323	2.23756	4.41508	2.63328	5.85174	1.5857	3.95023	2.80159	4.89548	0.953645	-4.81095	2.89975	-1.15357	2.67175	-3.8871	5.6047	3.17878	0.263846	4.618	-1.20207	4.80362	2.73973	3.48848	3.828	6.70352	0.582741	2.82189
TCGA-HC-8265-01A	-0.572898	3.89164	3.00248	5.38608	4.33964	8.10937	3.70197	4.15863	1.78791	2.84355	5.42242	-2.80595	3.53503	2.94064	4.03543	4.94701	3.07925	3.70859	-0.303194	0.929444	2.52994	4.88558	-1.60203	2.54123	4.43731	2.64142	5.8711	2.0164	3.8991	2.6563	4.95499	1.02359	-5.30477	2.71659	-1.22425	2.53768	-3.69071	5.59763	3.33431	-0.182967	4.36267	-1.6489	4.79517	2.53342	3.44494	3.73373	6.712	0.940518	2.04479
TCGA-HC-8266-01A	-0.732698	3.77017	2.96816	5.3796	4.24135	7.73122	3.34492	4.27145	1.75924	2.96133	4.91095	-2.91035	3.75713	2.76535	3.90902	4.39107	3.04003	3.20139	-0.160795	0.451815	1.94547	4.81464	-1.9839	2.19766	4.48385	2.29213	5.87262	0.831429	3.71427	2.30692	4.8788	-0.0491814	-5.97544	2.41269	-1.24187	1.79771	-4.61299	5.58151	3.42787	0.0973155	4.1316	-1.86925	4.76878	2.06623	2.95549	3.50922	6.71258	0.502701	0.845782
TCGA-HC-A48F-01A	-0.514576	4.58784	2.85851	5.4812	4.72379	8.82917	3.14235	3.99308	1.80465	3.15969	5.34639	-2.75801	3.71988	4.07348	4.55615	5.34206	3.34485	3.94016	1.09515	0.505242	2.69405	4.79648	-1.16571	2.15877	4.50745	2.91053	5.84056	1.65344	4.28774	3.65758	4.91452	2.16363	-4.3119	3.47473	-1.07279	3.68831	-3.13325	5.57699	3.20179	1.28963	4.75695	-1.05471	4.82389	3.477	4.09984	3.888	6.82158	1.54046	3.77658
TCGA-HC-A4ZV-01A	-0.891661	3.40253	2.77153	5.43024	3.96088	8.25596	3.33655	4.23199	1.79295	3.20116	5.09958	-2.78476	3.42793	2.18721	3.81815	4.39871	3.29824	3.13948	-0.495131	0.456169	2.3531	4.929	-1.8876	2.49442	4.41312	2.29905	5.87384	0.388053	3.53843	2.69263	5.03251	0.46	-5.88316	3.17908	-1.19029	1.34222	-4.5896	5.61197	3.78814	-0.525305	3.91188	-1.75654	4.81683	2.44211	3.2711	3.48375	6.66997	0.451179	0.648137
TCGA-HC-A631-01A	-0.836073	3.63989	3.00311	5.47591	4.65883	8.40119	3.27873	4.30116	1.79069	3.20531	5.53329	-2.86577	3.87664	3.75795	4.17196	5.22425	3.16601	3.801	0.407928	0.730192	2.58766	4.69589	-1.70724	1.82891	4.4316	2.64566	5.89631	0.643139	3.91034	3.04588	5.02138	1.61137	-5.17137	2.96181	-1.15118	3.10717	-3.74788	5.6312	3.12561	0.720167	4.53393	-1.62567	4.77742	2.75987	3.3902	3.73193	6.7496	1.23871	1.98068
TCGA-HC-A632-01A	-0.726561	3.97067	2.91786	5.45666	4.03259	7.7869	3.44682	4.23774	1.76777	3.15211	5.33438	-2.89988	3.35919	3.49141	3.81465	4.46713	3.18008	3.70208	-0.643792	0.312344	1.88868	4.70243	-1.55186	2.532	4.45981	2.44088	5.83511	-0.659769	3.64478	2.55122	4.91049	-0.551178	-5.02693	2.66952	-1.05862	1.71502	-5.02149	5.57069	3.38213	-0.526397	4.48042	-1.60826	4.75562	2.64132	3.12678	3.72019	6.71874	-0.685363	1.76536
TCGA-HC-A6AL-01A	-0.773723	3.17999	3.12166	5.43627	4.38027	8.59682	3.63736	4.03653	1.79587	3.33265	5.64929	-2.79816	3.69383	2.63826	3.62737	5.0024	3.02175	3.90666	0.0677465	0.6511	3.09983	4.9519	-1.80489	2.53744	4.45624	2.21363	5.91494	2.71279	3.40213	1.85938	4.91486	1.33278	-6.34602	3.33387	-1.40747	2.8245	-3.99573	5.67332	3.05119	-0.734635	4.02345	-1.83426	4.83506	2.43254	3.74054	3.55052	6.66675	0.389666	1.11918
TCGA-HC-A6AN-01A	-0.74983	3.38274	3.15933	5.45553	4.19959	8.8871	3.65107	3.97796	1.79122	3.35906	5.69749	-2.82718	3.73179	2.95902	3.71759	5.07327	2.97407	4.50292	0.205905	0.152646	3.42853	4.71744	-1.63896	2.13287	4.42268	2.28835	5.92757	3.50164	3.55806	2.11579	4.95115	1.88245	-6.23071	3.08764	-1.42235	2.91794	-4.10402	5.67935	2.80846	-0.710686	4.21339	-1.72946	4.82854	2.35141	3.74703	3.58727	6.69114	0.233028	0.844426
TCGA-HC-A6AO-01A	-0.825409	3.34616	3.15929	5.45199	4.33745	8.58878	3.25864	4.04762	1.80728	3.61144	5.75585	-2.81769	3.80459	3.19462	4.1601	4.87527	3.01661	4.11326	0.466181	0.405645	3.31065	5.23116	-1.71024	2.37334	4.45912	2.21518	5.91163	2.69186	3.46912	2.07541	4.79968	2.25398	-6.15332	3.49064	-1.36232	2.52692	-4.40248	5.73248	3.31761	-0.557528	4.11488	-1.8027	4.85936	2.43264	3.80783	3.57213	6.71088	0.240506	1.4904
TCGA-HC-A6AP-01A	-0.867382	2.55398	3.17884	5.46324	4.03692	8.39621	3.74541	3.80359	1.76766	3.31877	5.65918	-2.85235	3.88589	2.39622	3.58809	4.7472	2.89521	3.9576	0.144882	0.20045	3.45462	4.83641	-1.97664	2.24773	4.46483	2.24031	5.95376	3.1198	3.14204	1.30147	4.91373	0.94523	-7.15136	3.28517	-1.55354	2.19253	-4.01336	5.6692	3.04118	-0.983937	3.73984	-2.16331	4.80994	1.97917	3.44546	3.34303	6.64219	0.0222404	-0.646267
TCGA-HC-A6AQ-01A	-0.720623	3.04178	3.1511	5.42666	4.18766	8.34461	3.59752	3.90764	1.78476	3.14694	5.59266	-2.82713	3.61741	2.93281	3.6366	4.84388	2.94633	4.12902	0.147584	0.302088	3.19523	4.75064	-1.81641	1.94803	4.45428	2.39853	5.91249	2.85311	3.35553	1.779	4.9745	1.65309	-6.4845	2.79017	-1.43376	2.68082	-4.14446	5.65091	2.86445	-0.747329	4.09814	-1.78211	4.82061	2.35946	3.30537	3.52104	6.67838	0.153127	0.544493
TCGA-HC-A6AS-01A	-0.824948	2.71391	3.23004	5.44043	4.21143	8.36122	4.00217	3.89908	1.75209	3.07301	5.54567	-2.89365	3.78216	2.1931	3.5092	4.65108	2.86073	3.85764	0.0287724	0.254953	3.11574	4.7979	-1.96382	2.33425	4.44648	2.24556	5.94638	2.73327	3.23769	1.29137	4.96342	0.650595	-7.3805	3.22737	-1.56566	2.06292	-4.49068	5.64397	3.07864	-0.993663	3.76641	-2.20668	4.78779	1.83836	3.15169	3.35276	6.65413	-0.0820094	-0.652867
TCGA-HC-A6HX-01A	-0.76709	2.62953	3.10924	5.39027	4.14127	8.60125	4.09656	3.79854	1.7713	3.08052	5.45354	-2.80059	3.74754	2.38607	3.3122	4.68358	2.86002	4.33862	-0.0449965	0.332138	3.63003	4.881	-2.07626	1.92298	4.49483	2.15702	5.92213	3.23337	3.46137	1.4526	5.0279	1.13891	-7.09707	2.89866	-1.59256	2.18284	-4.09201	5.62978	2.7753	-1.168	3.80946	-2.00232	4.82562	1.79044	3.06833	3.32068	6.7143	0.139041	-0.917279
TCGA-HC-A6HY-01A	-0.800894	3.58491	3.02855	5.41729	4.4756	8.54374	3.71912	4.09753	1.80566	3.15652	5.4961	-2.79642	3.53781	3.25238	4.24342	4.98313	3.11842	4.22691	0.131002	0.110071	2.93082	4.9181	-1.78789	1.86149	4.45316	2.22911	5.88291	1.72832	3.7143	2.50872	5.02696	1.49224	-5.85926	3.08321	-1.29225	2.60681	-4.00626	5.64679	2.89972	-0.833775	4.43105	-1.41851	4.84122	2.90314	3.53125	3.71797	6.7804	0.299502	1.92287
TCGA-HC-A76W-01A	-0.484514	2.98943	2.90531	5.43895	3.66018	8.2524	3.4822	4.07139	1.74873	2.58905	5.39307	-2.87735	3.37016	2.41487	2.96144	4.55624	3.04363	3.20631	-0.559809	0.138759	2.34591	4.70105	-1.51535	2.40784	4.41397	2.38523	5.89013	1.27959	3.67016	2.20292	4.95663	-0.2352	-5.92457	2.8108	-1.27719	1.32046	-4.06386	5.55565	3.74837	-0.779343	4.49145	-1.55048	4.73276	2.03124	3.0644	3.61435	6.67296	0.172449	-0.106471
TCGA-HC-A76X-01A	-0.531797	3.88874	2.89539	5.43252	4.03549	8.54939	3.51076	4.17996	1.81054	3.02451	5.40037	-2.78179	3.09818	3.43699	4.14095	5.18222	3.25133	4.15242	0.159249	0.195685	1.98487	4.79975	-1.48723	2.20602	4.43484	2.57057	5.84901	1.25387	3.88231	3.08027	4.96948	1.28408	-4.47967	2.92876	-1.10666	2.71294	-3.82179	5.62441	2.96816	-0.175511	4.7038	-0.980003	4.83075	3.25913	3.35587	3.82299	6.7181	0.142389	3.21459
TCGA-HC-A8CY-01A	-0.731921	4.04751	2.95082	5.42898	4.46074	8.39499	2.86945	4.31511	1.81007	2.87275	5.26135	-2.80772	3.61735	3.74988	4.26358	5.00778	3.26272	2.96418	0.523449	0.663816	2.11114	4.88689	-1.5132	2.23075	4.41893	2.75653	5.85684	0.664054	4.08912	3.16805	4.88001	1.0347	-4.68939	3.25009	-1.13225	3.15919	-4.02956	5.55904	3.27434	0.561884	4.59058	-1.21054	4.81794	3.29476	3.18649	3.86887	6.76528	0.855809	3.1638
TCGA-HC-A8D0-01A	-0.533769	3.50318	2.95448	5.40506	3.69274	7.63992	3.93629	4.07179	1.75689	2.69364	5.12298	-2.91407	3.28434	2.60405	3.58954	4.39099	3.06161	3.90528	-0.579467	0.39834	1.88388	4.75845	-1.78847	2.31613	4.48481	2.30501	5.84877	0.311487	3.59611	2.32761	4.88828	-0.205789	-5.59139	2.42087	-1.27791	1.45268	-4.46971	5.6069	3.08829	-0.823388	4.34391	-1.49151	4.75138	2.16464	2.86472	3.56881	6.65602	-0.43223	0.816285
TCGA-HC-A8D1-01A	-0.670913	3.47576	3.01138	5.45575	4.08697	8.09551	3.46327	4.20341	1.76725	2.99363	5.31223	-2.89543	3.34987	3.05204	3.45526	4.94814	3.03163	3.37803	-0.255895	0.558284	2.30482	4.66976	-1.77444	2.29565	4.38327	2.80245	5.89223	1.19361	3.68602	2.3309	4.90014	0.462156	-5.3668	2.6656	-1.29139	1.76261	-3.93384	5.55455	3.39034	-0.187673	4.22092	-1.70528	4.73525	2.28124	3.08956	3.6838	6.66534	0.395917	1.01816
TCGA-HC-A9TE-01A	-0.627092	4.00476	2.96329	5.34014	4.54709	8.46076	3.6146	4.02724	1.76959	2.98503	5.05712	-2.80318	3.80077	2.35844	4.10028	4.51815	2.98428	3.56046	0.0944067	0.582661	3.14645	4.82058	-1.665	2.19925	4.47603	2.83157	5.90053	1.47172	3.89641	2.30523	5.04541	0.00826251	-6.34438	2.61615	-1.29856	2.28247	-3.72198	5.54458	3.8155	0.312266	4.14866	-1.92018	4.76039	1.77924	3.53484	3.62044	6.71523	0.966937	0.257913
TCGA-HC-A9TH-01A	-0.862919	3.38579	2.97303	5.44476	4.72501	8.11794	3.30311	4.28966	1.79233	3.4334	5.35044	-2.82286	3.65471	3.89003	3.53408	5.13913	3.22999	3.31975	0.280619	0.827388	2.58918	4.78423	-1.87412	2.24766	4.45468	2.6554	5.91711	1.55345	3.91527	2.76652	4.9732	1.43585	-5.39484	3.52279	-1.17884	2.82319	-3.62224	5.63323	3.63643	0.90292	4.31275	-1.74119	4.78178	3.02429	3.35891	3.66159	6.67572	1.42895	1.62738
TCGA-HI-7168-01A	-0.582631	2.89948	2.7844	5.46462	4.12047	8.97017	4.00407	4.00276	1.74943	3.29542	5.41031	-2.82702	3.57198	3.03116	3.17736	4.90124	3.18134	3.37662	0.066466	0.720655	3.39625	4.93316	-1.51741	2.80246	4.48223	2.66161	5.93742	2.4268	3.82067	2.57733	5.0385	0.395329	-5.74886	3.77123	-1.20568	1.3615	-2.90264	5.52625	3.9668	0.715559	4.21044	-1.80998	4.72469	2.31745	3.40543	3.49788	6.6857	1.87314	-0.429987
TCGA-HI-7169-01A	-0.059465	2.39509	2.85939	5.44562	2.89053	8.05353	4.17566	3.73049	1.71354	3.58697	5.69022	-2.82646	3.4764	3.00443	1.10727	4.6624	2.89076	3.68966	-0.354439	0.613738	3.8742	4.53505	-1.01915	2.90106	4.39926	2.65662	5.99735	3.20673	3.62421	1.76537	4.7434	0.104164	-5.49081	3.66565	-1.41729	0.682114	-2.71547	5.49467	3.96287	-0.147849	3.86436	-2.01762	4.71866	1.74516	3.06401	3.40977	6.65286	1.24413	-2.17765
TCGA-HI-7170-01A	-0.786054	2.32525	3.10895	5.52683	3.79466	7.92073	3.60291	4.08936	1.73099	3.1649	5.49971	-2.98015	3.60637	2.4066	2.1614	4.71446	2.8405	3.28997	-0.683965	0.350181	2.85263	4.51468	-1.96519	2.19805	4.34245	2.41138	5.96032	1.80713	3.38107	1.39203	4.8254	0.0495894	-6.54758	3.02677	-1.51497	1.04714	-3.9378	5.5953	3.47251	-0.389958	3.82251	-2.16394	4.67188	1.77295	2.72102	3.42728	6.61551	0.267905	-1.92016
TCGA-HI-7171-01A	-0.723297	4.18066	2.85823	5.43645	4.29624	8.32078	3.4519	4.29961	1.81051	2.82936	5.34049	-2.80384	3.28772	3.95019	4.61411	4.65789	3.32949	4.12723	0.360158	0.0507574	2.06787	4.86098	-1.76388	2.23914	4.50571	2.14595	5.83501	0.764732	4.02651	3.40608	4.96467	0.960494	-4.68027	3.15544	-1.01507	2.20199	-4.22137	5.6229	3.65663	0.142463	4.55024	-1.19375	4.81963	3.27004	3.27259	3.92641	6.68259	0.402611	3.31227
TCGA-J4-8198-01A	-0.310297	3.83606	2.84456	5.4638	3.93288	8.57477	3.31085	4.20997	1.76965	2.73953	5.37684	-2.83247	3.21756	3.37715	3.80332	4.83974	3.22894	3.29802	0.222055	0.384263	2.0335	4.62652	-1.14012	2.4693	4.42016	2.99193	5.89443	1.4394	4.05609	3.05803	4.9583	0.363191	-4.30395	2.86526	-1.15115	1.83656	-3.65964	5.51811	3.49172	0.288009	4.98793	-0.899179	4.74337	3.01316	3.05975	3.91662	6.6727	0.690829	2.33353
TCGA-J4-8200-01A	-0.52726	3.72846	3.0541	5.55928	3.94936	8.07019	3.35759	4.22802	1.77148	3.10624	5.48734	-2.90818	3.51565	3.57245	3.75386	5.13201	3.05161	3.61139	0.387927	0.409896	2.61924	4.51975	-1.56038	2.42785	4.37562	2.72271	5.9078	1.3076	3.68481	2.58121	4.75782	0.940426	-5.19933	3.59896	-1.22196	1.97601	-2.93856	5.58695	3.57119	0.705525	4.34	-1.29565	4.72052	2.86578	3.81612	3.70936	6.61195	1.11528	1.75702
TCGA-J4-A67K-01A	-0.701442	3.05449	3.12104	5.38907	3.70984	7.99658	3.59408	4.0515	1.7854	2.82339	5.55239	-2.874	3.40397	2.01588	3.67535	4.55064	2.90116	4.21227	-0.664013	0.202573	2.40474	4.74906	-1.90462	2.27833	4.47203	2.03448	5.88928	1.26921	3.34109	1.69613	4.8777	0.603401	-6.34773	2.56447	-1.48528	1.80275	-4.98623	5.67309	2.91707	-1.6477	4.16395	-1.68261	4.82341	1.7915	2.97494	3.51113	6.67495	-0.881329	0.426602
TCGA-J4-A67L-01A	-0.91179	2.68682	3.26686	5.44976	4.54062	8.66834	3.67962	4.07637	1.77297	3.31761	5.83339	-2.88009	3.89434	2.76139	3.5457	5.14913	2.87685	4.0593	0.130394	0.290596	3.37395	4.63882	-2.01173	2.00988	4.46017	2.49681	5.95457	3.02189	3.27288	1.4461	4.96553	1.58538	-6.98423	3.0657	-1.49506	2.68594	-3.97036	5.67993	3.15468	-0.614153	3.90932	-2.12029	4.78884	2.01494	3.4348	3.3911	6.64665	0.430451	-0.203009
TCGA-J4-A67M-01A	-0.756021	2.4976	3.22073	5.42461	4.14144	8.3666	3.522	3.77712	1.74772	3.01474	5.6239	-2.90837	3.69897	2.26074	3.05785	4.48893	2.83274	3.64398	-0.098985	0.249315	3.1494	4.65804	-1.97441	2.36294	4.43148	2.29379	5.93857	2.84892	3.22645	1.22095	4.90888	0.586149	-7.08739	3.01959	-1.58682	1.93799	-4.38687	5.63332	3.23319	-0.881521	3.85918	-2.18274	4.77075	1.89639	3.2101	3.34934	6.6707	0.126228	-0.902557
TCGA-J4-A67N-01A	-0.754467	3.58872	3.17432	5.43501	4.57398	8.76851	3.76041	4.00062	1.79039	3.39197	5.66334	-2.82941	3.69962	3.06076	4.0574	4.90131	2.93596	4.46926	0.372234	0.291325	3.5897	4.67099	-1.81863	2.08747	4.51469	2.18092	5.91623	2.75323	3.50711	2.01435	4.97631	1.59794	-6.63041	3.3318	-1.50702	2.78163	-4.22232	5.66982	3.06824	-1.10266	4.16802	-1.58245	4.83938	2.38487	3.55417	3.58297	6.75692	0.159268	1.06243
TCGA-J4-A67O-01A	-0.519135	2.24575	3.18033	5.45681	3.89113	8.78759	4.03224	3.7148	1.74597	3.64811	5.84441	-2.85204	3.75252	2.43069	2.56908	4.64005	2.78339	4.24611	0.169733	0.149821	4.05775	4.65493	-1.52493	2.44094	4.45533	2.31094	5.98892	3.74729	3.22809	1.22544	4.81432	1.05871	-7.03142	3.49793	-1.6316	1.54045	-3.81034	5.64517	3.36372	-1.04202	3.79099	-2.08179	4.76004	1.54329	3.19176	3.36068	6.62672	0.498177	-1.73434
TCGA-J4-A67Q-01A	-0.615369	2.2155	3.11903	5.42435	3.65937	8.07988	3.95391	3.67155	1.7295	3.0458	5.53588	-2.91159	3.62185	2.29701	2.61209	4.40549	2.85608	3.74965	0.00871931	0.187721	3.38303	4.5778	-1.88263	2.29406	4.47516	2.30624	5.94562	2.67535	3.15661	1.14672	4.92301	0.423668	-7.13381	3.14293	-1.58259	1.56306	-4.37541	5.60643	3.2667	-0.987366	3.80101	-2.16144	4.75138	1.92002	2.72305	3.23586	6.60782	-0.0413667	-1.89672
TCGA-J4-A67R-01A	-0.743484	2.51277	3.16581	5.40592	3.89476	8.26315	3.6384	3.85813	1.75185	3.0555	5.53243	-2.88895	3.53751	1.97615	2.95259	4.57171	2.84226	3.76756	-0.622613	0.17052	3.01115	4.6395	-1.95453	2.2516	4.4492	2.14061	5.93279	2.25825	3.24607	1.24144	4.91187	0.128251	-7.08015	2.68716	-1.59733	1.45553	-4.49871	5.63008	2.99717	-1.51489	3.84109	-2.25408	4.77495	1.59808	3.15445	3.35084	6.67128	-0.517713	-1.1227
TCGA-J4-A67S-01A	-0.768751	3.29035	3.19786	5.39882	4.36052	9.00934	3.65733	3.99177	1.78365	3.03556	5.59413	-2.82574	3.68048	2.94153	3.93026	5.00672	2.92528	4.17886	0.0983468	0.38896	3.16215	4.64235	-1.88962	2.13971	4.42485	2.2396	5.91858	2.60458	3.53372	1.8439	5.01423	1.57244	-6.47634	2.85497	-1.53745	2.65483	-4.25088	5.66601	2.98516	-0.862657	4.10145	-1.96364	4.82694	2.39812	3.64194	3.54027	6.73179	0.0663171	0.757171
TCGA-J4-A67T-01A	-0.678752	3.66866	3.14923	5.47223	4.4688	8.39971	3.73836	4.30904	1.76621	3.128	5.56313	-2.9284	3.59375	3.06791	3.79748	5.19763	2.97041	3.51231	0.197571	0.524593	2.67732	4.57357	-1.75945	2.25752	4.35466	2.48406	5.89812	1.94754	3.89461	2.4343	4.88498	1.31013	-5.51176	3.06705	-1.38128	2.01209	-3.81876	5.62682	3.30108	0.00088832	4.40761	-1.58485	4.72604	2.40856	3.72133	3.67841	6.6628	0.862456	1.42223
TCGA-J4-A6G1-01A	-0.875484	3.61065	2.955	5.36573	3.77326	7.12057	3.60875	4.17262	1.76203	3.3849	4.74566	-2.91173	3.32199	2.51312	3.81545	4.2287	2.99069	3.35747	-0.972592	0.237992	1.94116	4.95298	-2.22362	2.22052	4.53801	2.06905	5.85781	0.539301	3.38508	1.67982	4.82701	-0.835735	-6.20149	2.02453	-1.32606	1.33028	-5.47887	5.62674	2.98708	-1.30179	3.87404	-2.16416	4.77435	1.51699	2.40227	3.42085	6.70325	-0.754595	0.221671
TCGA-J4-A6G3-01A	-0.881514	3.31162	3.00318	5.43678	4.25025	8.14303	3.39656	4.35821	1.77457	3.16102	5.26333	-2.87664	3.60689	2.65058	3.6673	5.03913	3.03988	3.39618	-0.342834	0.662371	2.502	4.87361	-2.05673	2.24039	4.42796	2.35924	5.90814	0.732741	3.71622	2.09772	4.90156	0.421594	-6.05107	2.82776	-1.34719	1.93793	-4.49881	5.63631	3.29235	-0.136738	4.13302	-2.0283	4.75362	2.00221	3.06211	3.55291	6.67629	0.0904789	0.470586
TCGA-J4-A6M7-01A	-0.365191	3.97464	2.85959	5.45855	3.92651	8.42726	3.49866	4.11506	1.78739	2.85573	5.41048	-2.82876	3.07694	3.21451	3.95129	5.03712	3.28028	3.83498	-0.0338294	0.114425	1.92809	4.75827	-1.27744	2.46413	4.42299	2.48122	5.85302	0.979644	4.00685	3.19112	4.96538	0.72991	-4.39447	3.12324	-1.09892	2.3338	-3.67743	5.58965	3.24823	-0.0802371	4.81423	-0.980261	4.7827	3.40017	3.27059	3.85401	6.71278	0.240986	3.04167
TCGA-J4-A83I-01A	-0.664869	3.95037	3.00289	5.42354	4.29612	7.95433	3.5334	4.28115	1.78384	3.1109	5.28471	-2.85868	3.27584	3.63844	3.61486	4.83643	3.16952	3.71669	-0.169545	0.375558	2.17826	4.83635	-1.77963	2.57571	4.42205	2.58834	5.82271	1.14196	3.86105	2.84466	4.96011	1.41583	-4.63178	2.865	-1.12283	2.40628	-4.07276	5.57867	3.77047	-0.343297	4.37013	-1.58477	4.78261	2.74372	3.81165	3.71395	6.75864	0.162228	2.24748
TCGA-J4-A83J-01A	-0.729951	3.87175	3.08313	5.47445	4.41851	8.29771	3.12769	4.31434	1.79497	3.32945	5.44473	-2.80553	3.76893	3.61308	4.26522	5.13209	3.01562	3.37778	0.702221	0.447487	2.90176	4.66916	-1.5322	2.12284	4.34739	2.67546	5.90306	2.19901	3.95319	2.7769	4.98389	2.416	-5.27231	3.01009	-1.29966	2.44855	-3.43423	5.62586	3.08497	0.122741	4.39043	-1.58594	4.78268	2.43982	3.8473	3.80092	6.76098	0.813667	1.52587
TCGA-J4-A83K-01A	-0.451673	3.83142	2.97859	5.42899	4.04539	8.39135	3.75619	4.07566	1.76756	2.85953	5.33076	-2.85829	3.2251	2.75658	3.86385	4.99054	3.1192	3.63678	0.00256495	0.331373	2.24612	4.73581	-1.62185	2.35738	4.44453	2.55076	5.85851	1.24311	3.8044	2.66845	5.00275	0.606775	-5.22773	2.88945	-1.25041	2.35762	-3.62628	5.57787	3.13958	-0.262147	4.44215	-1.44674	4.76204	2.77802	3.57672	3.64329	6.67759	0.4734	2.04041
TCGA-J4-A83L-01A	-0.456575	3.71728	3.05167	5.48521	4.07075	8.22419	3.62559	4.1396	1.76237	3.07783	5.40115	-2.88931	3.34559	3.39056	3.82127	5.18702	3.08763	3.44533	0.400746	0.407303	2.54967	4.65425	-1.47899	2.38679	4.38256	2.78626	5.88108	1.69311	3.80309	2.61637	4.92224	1.43334	-5.26182	3.11253	-1.25669	2.39378	-3.44142	5.56105	3.26323	0.422191	4.42447	-1.42284	4.73137	3.02952	3.54829	3.7052	6.66038	0.882518	1.54423
TCGA-J4-A83M-01A	-0.601276	3.72119	3.10961	5.3917	4.32499	8.38122	3.65664	4.31216	1.78395	2.82558	5.43062	-2.83893	3.3642	2.96693	3.95042	5.08013	3.00092	3.51465	0.0811123	0.619731	2.25928	4.70962	-1.6984	2.23581	4.36114	2.73081	5.87952	1.80659	3.91295	2.55686	5.07438	1.38145	-5.11055	2.56238	-1.3219	2.22568	-3.67085	5.59883	3.11518	-0.22943	4.49046	-1.50942	4.77355	2.63626	3.70154	3.74953	6.69054	0.591756	1.68665
TCGA-J4-A83N-01A	-0.674041	3.70581	3.10485	5.46388	4.37588	8.45748	3.46944	4.2514	1.79525	3.14362	5.52516	-2.84754	3.33892	3.19852	4.03344	5.18075	3.05842	3.7058	-0.0372049	0.537532	2.56215	4.63856	-1.66766	2.32816	4.36923	2.61633	5.87226	1.17973	3.66563	2.49249	4.93617	1.355	-5.34148	2.9032	-1.33268	2.50946	-3.87459	5.63687	3.05674	-0.449387	4.39831	-1.52551	4.7894	2.68999	3.70924	3.71325	6.69664	0.426035	2.14092
TCGA-J4-AATV-01A	-0.578819	3.5675	3.12276	5.43943	4.03151	8.09113	3.76442	4.16214	1.74485	2.96913	5.32115	-2.93904	3.52182	2.40148	3.55906	4.7917	2.8788	3.25434	-0.0745132	0.57672	2.5968	4.6557	-1.79366	2.10846	4.40841	2.19722	5.88796	1.38276	3.75158	2.04388	4.89221	0.389399	-6.17245	2.67215	-1.54313	1.63377	-3.97367	5.58549	3.08399	-0.518407	4.18757	-1.99804	4.706	1.84175	3.33606	3.52386	6.68249	0.120826	0.275737
TCGA-J4-AATZ-01A	-0.718291	4.08593	2.99482	5.43974	4.5517	8.44853	3.19888	4.39291	1.81194	3.26433	5.43646	-2.78199	3.61491	4.2867	3.78881	5.18539	3.18771	3.62509	0.524028	0.687898	2.574	4.8124	-1.50557	2.00352	4.36688	2.74895	5.85266	1.57425	4.25041	3.38839	4.97647	2.36059	-4.1015	2.9973	-1.1013	3.20385	-3.28136	5.58513	3.60738	0.715029	4.46553	-1.41466	4.80053	3.24268	3.82187	3.87619	6.77254	1.39886	2.9005
TCGA-J4-AAU2-01A	-0.55684	3.61121	3.09401	5.47486	4.29383	8.56221	3.25117	4.20331	1.78234	3.24359	5.644	-2.8093	3.48921	3.39647	3.68083	5.37038	3.01554	3.44363	0.420617	0.40953	2.93333	4.44891	-1.34159	2.19621	4.34438	2.82796	5.92536	2.83142	3.70565	2.41089	5.00455	1.58923	-5.3317	3.32627	-1.32517	2.63222	-2.8238	5.60385	3.45074	0.150705	4.38912	-1.56477	4.77574	2.82898	4.00282	3.70308	6.70124	1.21282	1.24198
TCGA-J9-A52B-01A	-0.169052	5.23027	2.65286	5.28971	4.45192	8.3106	5.04759	3.95406	1.80572	3.86972	5.2216	-2.62464	3.76144	3.73189	5.22449	4.68358	3.27302	5.0454	0.661285	0.781104	3.36354	5.86356	-1.0719	2.57399	4.72196	1.9685	5.85917	4.65357	4.65373	3.74845	4.87425	1.84401	-4.28919	3.39839	-0.925377	3.08197	-4.10479	5.55901	3.04394	0.199279	5.09846	-1.15237	4.8842	2.43714	3.797	3.99141	6.97199	1.40969	3.66883
TCGA-J9-A52C-01A	-0.591063	2.86516	3.09733	5.46133	3.61483	7.94643	4.12278	4.05135	1.71462	2.79461	5.39584	-3.00474	3.58982	2.17621	2.90543	4.52035	2.89344	3.34334	-0.638697	0.3582	2.63409	4.56196	-1.86054	2.51213	4.42055	2.11561	5.91331	1.38764	3.47394	1.71748	4.82726	-0.534614	-6.56565	2.69495	-1.51002	1.2723	-4.47079	5.56364	3.12667	-1.10908	3.97013	-2.08979	4.67846	1.76137	2.69467	3.45365	6.65872	-0.0191431	-1.06564
TCGA-J9-A52D-01A	-0.745811	4.05171	2.97928	5.4985	4.57558	7.87602	3.16104	4.30754	1.8444	3.48348	5.39863	-2.74946	3.75061	4.05151	4.48565	5.56429	3.26197	4.37299	1.24024	0.535877	2.64063	4.89917	-1.38461	1.76321	4.42616	2.85977	5.86165	2.23271	3.93949	3.10892	4.96015	2.57671	-4.58576	3.37451	-1.03908	4.74793	-3.83497	5.65138	3.1702	1.02451	4.69201	-0.706163	4.86826	3.58502	3.41477	4.03146	6.71282	0.910543	3.77764
TCGA-J9-A52E-01A	-0.479148	3.20391	2.72501	5.38507	4.0518	8.36991	4.78932	3.94044	1.77603	3.33245	5.75712	-2.73959	3.83606	1.77559	3.92792	4.39803	3.21272	4.54781	-0.543254	0.820413	2.95615	5.13199	-1.39141	3.13481	4.58823	2.16506	5.95061	2.78568	3.80851	2.21885	5.05259	-0.110309	-5.94992	3.45255	-1.23591	1.90076	-3.78789	5.61996	3.77417	-0.602003	4.43283	-1.64052	4.81618	2.15792	3.31053	3.81396	6.67552	0.5954	0.644696
TCGA-J9-A8CK-01A	-0.520414	3.02506	2.97488	5.43675	3.94613	8.42803	3.97673	3.97464	1.74505	3.06593	5.47311	-2.87312	3.37995	2.27601	3.16297	4.79758	3.08131	3.67366	-0.407392	0.397508	2.88895	4.77516	-1.58622	2.6674	4.4409	2.27477	5.9014	1.84001	3.66119	2.19159	4.98974	0.486249	-5.84633	3.16206	-1.32874	1.72295	-4.13851	5.60154	3.46883	-0.788504	4.11197	-1.78714	4.73179	2.40075	3.13372	3.59665	6.67379	-0.000762933	-0.0560241
TCGA-J9-A8CL-01A	-0.680671	3.10949	2.92386	5.40898	4.24576	8.13518	3.73318	3.99837	1.75028	2.98238	5.45578	-2.86234	3.30702	2.95546	3.29944	4.75533	3.16586	3.03632	-0.653527	0.550038	2.30852	4.83019	-1.56063	2.65163	4.45501	2.75611	5.90392	1.15124	3.49775	2.09248	4.97046	-0.31748	-5.89132	2.98809	-1.17512	2.53396	-3.64009	5.58242	3.98648	0.205697	4.31111	-2.09183	4.75773	2.63912	3.2667	3.39227	6.7025	0.786785	0.577989
TCGA-J9-A8CM-01A	-0.733143	2.77171	2.97675	5.447	3.79187	8.26073	3.81212	4.12614	1.75211	2.89447	5.33534	-2.87856	3.47024	2.66327	3.04084	4.61517	3.17383	3.46897	-0.15963	0.322185	2.18172	4.65164	-1.7976	2.52919	4.43224	2.43809	5.89411	1.43235	3.4844	2.21938	5.06764	0.136175	-5.68967	3.30027	-1.29895	1.6815	-4.01144	5.58728	3.46072	-0.608631	3.91505	-1.88788	4.76827	2.64392	3.32511	3.55623	6.57909	0.182836	-0.22398
TCGA-J9-A8CN-01A	-0.46128	3.89719	3.08796	5.49272	4.12465	8.36424	3.56828	4.25857	1.80148	3.62985	5.68009	-2.79733	3.58619	3.37909	3.74829	5.33725	2.97978	4.02153	0.222545	0.674242	3.34356	4.65964	-1.09146	2.46422	4.31831	2.86623	5.92812	2.14537	3.82471	2.54503	4.85052	2.3631	-4.92245	3.3128	-1.29783	2.54831	-3.33351	5.6295	3.5664	0.0623681	4.54268	-1.27748	4.79022	2.62346	3.85772	3.87444	6.73418	1.01326	1.85984
TCGA-J9-A8CP-01A	-0.538169	3.53952	3.04683	5.47153	3.93714	8.87926	4.01057	4.04588	1.75708	3.33397	5.50741	-2.87694	3.55079	3.34284	3.85154	4.81105	3.02161	3.73092	0.48181	0.183728	3.02265	4.66646	-1.41247	2.78739	4.40665	2.34158	5.90465	2.64668	3.76656	2.5653	4.84796	1.47613	-5.19464	3.06652	-1.36739	2.07024	-3.93545	5.57798	3.14124	-0.674693	4.4015	-1.52351	4.74328	2.47449	3.49285	3.75153	6.73158	0.606842	1.0087
TCGA-KC-A4BL-01A	-0.818838	3.49251	3.02895	5.42287	3.94592	7.98023	3.63266	4.18208	1.75704	2.77864	4.94408	-2.92746	3.53299	2.55293	3.68753	4.57568	3.00746	3.43585	-0.104682	0.53171	2.26349	4.73607	-2.21753	1.91665	4.44691	2.3546	5.85441	0.873957	3.70501	2.19126	4.95381	0.483806	-6.15717	2.45938	-1.36915	1.9114	-4.27492	5.56926	3.03116	-0.0833783	4.04901	-1.82403	4.73809	2.12946	2.97369	3.55603	6.66578	0.177781	0.483347
TCGA-KC-A4BN-01A	-0.673798	4.17285	3.10503	5.48926	4.62781	8.52492	3.49699	4.3769	1.7924	3.30285	5.56688	-2.87125	3.55865	3.78933	4.20282	5.50168	3.0375	3.61622	0.636267	0.51716	2.823	4.62265	-1.56606	2.04031	4.32	2.58106	5.87683	2.12261	4.12913	2.92183	4.86417	2.15448	-4.75148	2.91091	-1.28238	2.48508	-3.4009	5.62868	3.12411	0.550039	4.5548	-1.402	4.7572	2.80209	4.08406	3.84917	6.72979	1.1714	2.67486
TCGA-KC-A4BR-01A	-0.326625	3.4715	3.01641	5.48595	3.71312	8.38296	4.24426	4.01458	1.72686	3.14077	5.50916	-2.92961	3.47803	2.34459	3.12367	5.04653	2.99587	3.46976	0.0319475	0.413353	2.88469	4.54535	-1.48314	2.72003	4.3707	2.11325	5.91985	1.82818	3.81557	2.3335	4.87814	0.464749	-5.66591	3.41348	-1.42376	1.21329	-3.45435	5.56902	3.55515	-0.443807	4.23394	-1.81384	4.67403	2.38706	3.77074	3.61753	6.65545	0.805575	0.178736
TCGA-KC-A4BV-01A	-0.620353	3.58641	2.8805	5.42502	3.76623	8.52392	3.58038	4.14907	1.76428	3.01665	5.24813	-2.84512	3.26756	3.39937	3.99881	4.38031	3.25574	3.36632	0.0412749	0.304075	2.2351	4.76349	-1.47381	2.70293	4.48581	2.74397	5.88655	1.27038	3.95505	3.00519	4.93579	1.11505	-4.49835	3.14791	-1.17395	1.82532	-4.12286	5.53318	3.41689	0.000478361	4.41811	-1.55214	4.75663	2.96792	3.07321	3.7844	6.70096	0.565819	1.79603
TCGA-KC-A7F3-01A	-0.755694	3.58442	3.13069	5.4805	4.16536	8.04033	3.48592	4.25158	1.78695	3.05038	5.3978	-2.89582	3.65314	3.12805	4.24659	4.91292	2.99031	3.69019	0.32435	0.499011	2.46258	4.72384	-1.79819	1.85162	4.38784	2.35837	5.87234	1.6839	3.71874	2.39352	4.87855	1.10249	-5.48333	2.84389	-1.37422	2.05181	-3.65146	5.64793	2.84738	0.0316414	4.38228	-1.4771	4.76635	2.41265	3.55633	3.67495	6.6504	0.617464	1.31923
TCGA-KC-A7F5-01A	-0.683663	3.86071	2.9999	5.38865	4.30676	9.00117	3.67901	4.09886	1.82807	3.44019	5.68025	-2.68117	3.50043	3.65134	4.33623	5.37302	3.24218	4.00249	1.03811	0.637721	3.13977	5.0689	-1.48348	2.25374	4.4596	2.58811	5.87774	3.34298	3.86961	2.94323	5.09908	2.72302	-5.04673	3.13402	-1.23268	3.8223	-3.00782	5.66453	3.30261	0.30942	4.46262	-1.41725	4.90394	3.45448	4.20047	3.71562	6.75939	1.40736	3.15444
TCGA-KC-A7F6-01A	-0.710786	3.65073	3.00626	5.40733	4.35194	7.9924	3.82804	4.1679	1.78487	2.68643	5.31763	-2.85922	3.44531	2.21527	3.94836	5.18438	3.09182	3.87733	-0.346305	0.550278	2.20027	4.70401	-1.93501	2.27582	4.47011	2.35225	5.84715	1.19723	3.6523	2.32757	4.99949	0.890868	-5.6224	2.59329	-1.29229	2.67218	-4.03913	5.64722	3.19988	-0.421378	4.32133	-1.60852	4.79458	2.49971	3.64171	3.61983	6.66345	0.162623	1.58028
TCGA-KC-A7FA-01A	-0.573085	3.58612	3.03635	5.44101	4.22128	8.35001	3.41965	4.11349	1.78069	3.1055	5.51498	-2.82362	3.47297	2.75269	3.99691	4.78656	3.08259	3.46631	-0.141553	0.527677	2.71054	4.60866	-1.51009	2.47188	4.44069	2.35291	5.88607	1.62854	3.59001	2.42426	4.981	1.33429	-5.91035	3.25752	-1.25318	1.87001	-3.92251	5.63014	3.75259	-0.546108	4.33239	-1.46345	4.7853	2.50682	3.65536	3.6781	6.73316	0.273281	1.50429
TCGA-KC-A7FD-01A	-0.859163	3.94232	3.07886	5.50952	4.51773	8.72332	3.54281	4.39051	1.79775	3.22745	5.69517	-2.90064	3.39751	3.51688	4.149	5.53564	3.15831	3.85147	0.216944	0.623146	2.52411	4.4922	-1.94295	2.63947	4.34443	2.23662	5.86023	1.22343	3.90191	2.84552	4.89106	1.58059	-4.99332	3.31161	-1.28585	2.47219	-3.86777	5.67359	2.93865	-0.153855	4.56096	-1.50385	4.78159	3.07729	3.81205	3.77764	6.6876	0.664818	3.10166
TCGA-KC-A7FE-01A	-0.585822	3.07021	3.00527	5.47661	3.75059	8.04536	3.77259	3.95257	1.73261	2.87045	5.25046	-2.9251	3.44293	2.81055	3.1335	4.759	3.06149	3.16763	0.0674524	0.266598	2.58396	4.49466	-1.84246	2.33797	4.43733	2.6357	5.91051	1.69211	3.48392	2.0681	4.97676	0.344823	-6.15875	3.2121	-1.31274	1.84931	-3.46686	5.54665	3.30822	0.00501119	4.07546	-1.80431	4.71564	2.66254	3.26241	3.45032	6.62063	0.633185	-0.234771
TCGA-KK-A59V-01A	-0.952777	4.14972	2.83103	5.26083	3.63165	6.51251	3.88141	4.29071	1.80992	3.35184	4.64424	-2.82496	3.30585	3.06207	5.00521	3.37648	3.18324	4.09777	-0.735194	0.0666151	1.9001	5.44975	-2.10978	2.01587	4.66921	1.7999	5.80465	0.150723	3.56419	2.3919	4.95512	0.150094	-5.79299	1.64576	-1.18003	1.8548	-6.47871	5.63817	2.6617	-1.31054	3.97245	-2.12596	4.87607	1.84645	1.71461	3.53127	6.73217	-0.615415	2.33562
TCGA-KK-A59X-01A	-0.86456	3.44394	3.07033	5.54012	4.66685	8.31729	3.54604	4.26094	1.80262	3.66272	5.72963	-2.81295	3.89928	4.53319	4.39846	4.93516	3.20954	3.61101	1.38461	-0.14025	3.1618	5.43741	-1.16216	1.85288	4.44891	2.44702	5.95987	2.07856	3.93275	2.98859	4.99879	3.39905	-5.56094	3.72427	-1.1616	2.94239	-3.60088	5.64689	3.69866	0.532397	4.46365	-1.46425	4.81802	3.34352	3.23005	3.6288	6.74407	1.55096	2.06539
TCGA-KK-A59Y-01A	-0.676535	3.76506	3.05795	5.44944	4.6658	9.06495	3.48827	4.20365	1.8001	3.2409	5.69361	-2.7968	3.63534	3.34075	4.00212	5.42624	3.13569	3.59836	0.0836857	0.615104	2.87813	4.82217	-1.53375	2.33074	4.44074	2.55154	5.89876	2.24631	3.956	2.82874	4.96605	2.09573	-4.95997	3.35285	-1.32204	3.54716	-3.17948	5.62123	3.09722	-0.324121	4.40658	-1.47875	4.81334	3.06613	4.06829	3.80414	6.71742	1.08144	2.50358
TCGA-KK-A59Z-01A	-0.497037	3.2523	3.007	5.49951	4.14019	8.64807	3.48895	4.23903	1.75113	3.32227	5.72302	-2.86899	3.75949	1.88784	3.18312	4.89465	2.95717	3.27993	-0.118934	0.57584	3.37204	4.68314	-1.19013	2.56771	4.34843	2.76988	5.97553	2.62102	3.8222	2.27581	4.8741	0.833334	-5.47746	3.31422	-1.40949	1.23345	-3.39765	5.58515	4.22426	0.0217921	4.36472	-1.6411	4.72435	1.73129	3.67974	3.64583	6.67449	1.25185	-0.012278
TCGA-KK-A5A1-01A	-0.757953	3.69444	2.7445	5.48917	4.12052	8.41783	3.13438	4.28711	1.80167	3.4173	5.3676	-2.80011	3.37696	3.33627	4.09099	4.93022	3.31504	3.78974	-0.142529	0.221003	2.08382	5.0391	-1.33851	2.29708	4.48594	2.41297	5.89885	0.843755	3.76548	2.85829	4.85779	0.849851	-5.37035	3.14804	-0.93251	1.95997	-4.74621	5.59598	3.60549	0.188516	4.55632	-1.27491	4.82601	2.6172	2.57876	3.73766	6.68266	0.0684623	1.84952
TCGA-KK-A6DY-01A	-0.713786	4.05502	3.0096	5.42905	4.20141	8.18615	3.4328	4.36167	1.78163	2.88913	5.18232	-2.89647	3.54115	3.43969	4.27552	5.00369	3.12442	3.34513	0.308258	0.343512	2.44556	4.80088	-1.75088	1.98023	4.44847	2.41477	5.8497	0.62887	4.08461	3.00767	4.96224	0.96057	-5.09805	2.73099	-1.24456	2.25636	-3.91585	5.59078	3.12155	-0.10588	4.55497	-1.38428	4.76729	2.75965	3.58365	3.71009	6.73575	0.53052	2.16985
TCGA-KK-A6E0-01A	-0.701239	4.07379	3.06146	5.52156	4.64656	8.6647	3.21265	4.30329	1.81171	3.49148	5.77403	-2.79778	3.76042	3.46613	4.41764	5.33278	3.11443	3.72718	1.00117	0.11509	2.96147	4.87731	-1.29884	1.98595	4.42059	2.78621	5.92283	2.92028	3.80054	2.84033	4.90084	1.70668	-5.40613	3.47649	-1.15549	3.79188	-3.48498	5.64709	3.47388	0.915461	4.57109	-1.23149	4.82609	2.91316	4.13646	3.65558	6.77015	1.35436	3.24276
TCGA-KK-A6E1-01A	-0.875189	3.96195	3.11232	5.50473	5.03404	8.80512	3.13638	4.35998	1.81078	3.63976	5.97324	-2.76237	3.8907	2.96501	4.19948	5.34865	3.106	3.5312	0.202997	0.692215	3.33558	4.84279	-1.75529	2.51235	4.39278	2.72913	5.94276	3.05922	4.01399	2.83864	5.07256	3.4497	-5.76592	4.05096	-1.27729	3.38799	-2.61563	5.67672	3.88628	0.0663643	4.31037	-1.63987	4.79262	2.92279	4.48736	3.72623	6.71449	1.61352	2.0713
TCGA-KK-A6E2-01A	-0.53135	4.38698	2.85498	5.41872	4.11001	8.24439	3.43125	4.29426	1.8035	2.91582	5.3809	-2.8195	3.10278	3.58453	4.37858	4.90159	3.30845	3.95991	-0.296886	0.0344103	1.90173	4.85775	-1.43373	2.3906	4.45331	2.58176	5.83259	0.609135	4.10151	3.54653	4.98543	1.80838	-3.82663	2.68712	-1.03958	2.10577	-4.23702	5.59144	2.91675	-0.436455	4.82264	-1.01772	4.81006	3.11608	3.22004	3.9122	6.74204	0.178192	3.65746
TCGA-KK-A6E3-01A	-0.776602	2.22147	3.13698	5.48539	4.01956	8.46508	3.5726	3.8473	1.75337	3.45813	5.64121	-2.87391	3.77215	2.86058	2.86342	4.82801	2.90678	3.66383	0.18565	0.0687019	3.69118	4.70129	-1.73108	2.15055	4.4413	2.35592	5.98414	3.1327	3.15592	1.21909	4.85722	1.08139	-7.29575	3.42742	-1.4982	2.03997	-4.09421	5.60658	3.18378	-0.815173	3.7278	-2.17644	4.77625	2.30552	2.9645	3.39052	6.65005	0.19107	-1.30482
TCGA-KK-A6E4-01A	-0.859893	3.20647	3.04723	5.44091	3.91321	8.20085	3.35627	3.99444	1.79971	3.12581	5.60825	-2.826	3.53238	3.40755	3.66037	4.69907	3.13937	4.43292	-0.00622093	-0.291373	2.68282	4.74371	-1.81873	2.13921	4.44489	2.01941	5.88831	2.21625	3.45158	2.18312	4.97062	1.2719	-6.17534	2.97653	-1.31485	2.37583	-4.90171	5.64029	2.99956	-1.09661	4.14513	-1.69066	4.86919	2.75078	3.10255	3.56886	6.71029	-0.34226	1.32707
TCGA-KK-A6E5-01A	-0.74736	3.47934	3.12896	5.4702	4.45023	8.2965	3.48729	4.12875	1.77696	3.04053	5.50669	-2.88574	3.46981	3.40529	4.12428	4.84926	3.04046	3.40619	0.359933	0.347323	2.58375	4.62807	-1.77555	2.06175	4.40874	2.49484	5.88767	1.83564	3.56995	2.26196	4.92068	1.44858	-5.63124	2.86573	-1.30949	2.44124	-4.11621	5.62232	3.20212	-0.251545	4.17091	-1.70266	4.78109	2.76183	3.42919	3.60549	6.66646	0.397214	1.49104
TCGA-KK-A6E6-01A	-0.725887	3.22435	3.01718	5.50179	3.90439	8.53902	3.47913	4.27674	1.76838	3.10232	5.47393	-2.91609	3.61709	2.92172	3.5169	4.68636	3.09744	3.42136	0.197171	-0.0159527	2.37603	4.74257	-1.47994	2.31064	4.39427	2.5892	5.92162	0.799701	3.67293	2.44056	4.83983	0.750677	-5.51883	3.20191	-1.29619	1.749	-4.56178	5.57733	3.37205	-0.335027	4.29929	-1.57207	4.75377	2.52569	3.15669	3.76411	6.69205	0.212172	0.978256
TCGA-KK-A6E7-01A	-0.788108	3.48967	2.95171	5.48811	4.34763	8.99737	3.96224	3.90107	1.79792	3.31978	5.56524	-2.77783	3.9568	4.28664	4.10537	5.01244	3.25877	4.01511	1.0698	0.142954	3.42301	4.73772	-1.50516	2.10383	4.46785	2.0532	5.91686	2.86558	3.90543	2.9736	5.04078	2.33557	-5.65415	3.50709	-1.25031	3.52473	-3.67716	5.63905	2.76105	0.178573	4.36424	-1.88646	4.8347	3.23701	3.45498	3.62123	6.7857	1.57407	1.80722
TCGA-KK-A6E8-01A	-0.466512	3.95646	3.06562	5.48119	4.18492	9.09902	3.09167	4.02984	1.81777	3.70841	5.758	-2.76065	3.68503	3.49252	4.4429	5.16124	3.08341	3.45082	1.06942	0.669852	3.30026	5.04295	-1.09513	2.08657	4.43564	2.95176	5.92141	3.03143	3.73115	2.75148	4.81273	3.10842	-4.84153	3.26207	-1.21567	3.28341	-3.2699	5.64102	3.80151	1.03355	4.4772	-1.1403	4.83563	2.86294	4.06327	3.84111	6.70291	1.40069	2.9048
TCGA-KK-A7AP-01A	-0.507827	4.81252	2.80674	5.35314	4.13523	8.66492	4.04794	4.28686	1.82345	3.08248	5.4226	-2.73361	3.47424	3.94168	5.11861	4.83097	3.30311	4.69674	7.27875e-05	0.670199	2.45505	5.34628	-1.38208	2.10261	4.50602	2.33292	5.7952	1.45568	4.32527	3.69092	5.0116	1.30771	-3.75152	3.0167	-1.06421	3.50056	-3.72697	5.56966	3.19718	0.144431	4.98489	-0.983727	4.8852	3.16311	4.1435	3.7713	6.85146	0.538341	4.55662
TCGA-KK-A7AQ-01A	-0.73951	3.02101	3.14968	5.41101	4.38546	8.74104	3.71811	3.96419	1.77783	3.35264	5.83091	-2.75042	3.73748	2.73781	3.57543	5.08818	2.91106	3.7447	0.0044985	0.426519	3.71704	4.51737	-1.62483	2.52219	4.38726	2.52913	5.9638	3.97768	3.6125	1.75734	5.13035	1.65565	-6.47546	3.21039	-1.51977	2.40268	-3.39501	5.65273	3.25972	-0.712579	4.03488	-2.11574	4.83215	2.16914	4.00401	3.52434	6.66705	0.821975	-0.2747
TCGA-KK-A7AU-01A	-0.713517	4.21536	2.92713	5.3891	4.71527	8.98835	3.30231	4.23939	1.82033	3.07979	5.27153	-2.74392	3.43912	3.9875	4.51551	5.23111	3.35175	4.0782	0.441313	0.38228	2.56207	4.83971	-1.58655	2.06682	4.52351	2.24807	5.82184	1.20104	4.16222	3.44984	5.07932	2.42207	-4.31729	3.07573	-1.13355	3.66902	-3.98294	5.63186	2.61459	-0.20684	4.53861	-1.34821	4.87847	3.59917	4.0531	3.85964	6.8234	0.882352	4.15479
TCGA-KK-A7AV-01A	-0.752782	3.78498	3.12242	5.37723	4.24467	7.81336	3.52307	4.18031	1.77145	2.92339	5.1	-2.89289	3.42855	2.67735	4.11464	4.43652	2.93491	3.55437	-0.34723	0.300115	2.28805	4.80621	-1.95279	1.99949	4.46852	2.48078	5.86547	0.982371	3.55445	1.95175	4.96252	0.560572	-6.19411	2.30617	-1.36952	2.2279	-4.66684	5.62164	3.0669	-0.7163	4.23253	-1.83352	4.77558	2.09811	3.14909	3.55765	6.71431	-0.0178545	1.09852
TCGA-KK-A7AW-01A	-0.736239	2.38636	3.24005	5.39308	4.28646	8.69647	3.70906	3.96344	1.78282	3.76923	6.03204	-2.77653	3.62718	2.35518	2.97768	4.67495	2.76286	4.46827	-0.321159	0.403146	3.9967	4.74082	-1.83358	2.42963	4.44461	2.17883	5.98842	4.32836	3.20167	1.13742	4.96724	1.8969	-6.81236	2.90344	-1.65569	1.85367	-4.50273	5.71125	3.16846	-1.76226	3.75439	-2.15323	4.85877	1.21777	3.16759	3.33423	6.66419	-0.0427056	-1.16022
TCGA-KK-A7AY-01A	-0.687811	3.18008	3.14073	5.48349	4.28936	8.61576	3.72635	4.1724	1.79149	3.22186	5.77742	-2.84609	3.7042	2.87151	3.96703	4.95735	3.00194	4.15175	0.00285382	0.230832	3.22775	4.8905	-1.57261	2.28875	4.42931	2.22704	5.92061	2.64521	3.59454	2.19327	4.94217	1.77352	-5.89559	2.99785	-1.45381	2.58626	-4.0375	5.64515	3.0534	-1.07774	4.25666	-1.64765	4.80611	2.30718	3.38256	3.70571	6.6526	0.267081	0.953998
TCGA-KK-A7AZ-01A	-0.494453	3.83931	2.97993	5.3735	3.91238	8.34705	3.73857	4.1402	1.81128	2.7771	5.4372	-2.76718	3.20131	1.92959	4.07769	4.94279	3.13223	4.3151	-0.152229	0.529063	2.27412	5.02799	-1.74395	2.85035	4.44435	2.12318	5.81243	1.38008	3.75191	2.48046	4.9102	0.90841	-4.9839	2.72791	-1.29109	2.87163	-4.56804	5.66744	3.11905	-0.873314	4.54428	-1.07377	4.85293	2.77196	3.64715	3.76888	6.68939	-0.382816	2.5878
TCGA-KK-A7B0-01A	-0.789725	2.67494	3.27737	5.40548	4.29226	7.96241	3.97773	3.94027	1.76279	3.24941	5.68279	-2.83633	3.88944	1.70801	3.45753	4.45389	2.70538	4.2946	-0.57341	0.268996	3.56879	4.71881	-1.97632	1.91024	4.44652	2.18735	5.96249	3.88314	3.21763	0.94279	5.02794	0.722773	-7.30409	2.52297	-1.71149	2.19216	-4.26968	5.67148	2.9476	-1.50547	3.68493	-2.15238	4.80971	1.39047	3.16341	3.29082	6.65293	-0.122848	-1.38822
TCGA-KK-A7B1-01A	-0.63781	3.3913	3.07853	5.45584	3.99706	8.44231	3.60561	4.10127	1.76373	2.90038	5.4428	-2.89089	3.49082	2.2605	3.52838	5.03264	3.03539	3.49129	0.0250451	0.307615	2.35981	4.57444	-1.80433	2.48902	4.42954	2.29345	5.88986	1.68964	3.59016	2.16816	4.92573	0.80723	-5.92669	3.05025	-1.39052	2.06619	-3.77567	5.63421	2.9974	-0.519928	4.29089	-1.61878	4.7537	2.36249	3.91456	3.67058	6.63926	0.219171	0.911622
TCGA-KK-A7B2-01A	-0.806102	3.02475	3.16339	5.43994	4.13198	7.85066	3.93145	4.02551	1.75378	3.15349	5.36655	-2.92335	3.72247	2.18797	3.39882	4.49662	2.83724	3.92728	-0.288506	0.126024	3.10048	4.74631	-1.99138	1.96296	4.44617	1.95755	5.91686	2.1327	3.38902	1.43976	4.89839	0.440581	-6.96696	2.62581	-1.5421	1.68329	-4.59294	5.64402	3.00606	-1.26136	3.90269	-2.07202	4.7586	1.6937	3.06389	3.47412	6.67883	-0.197884	-0.625652
TCGA-KK-A7B3-01A	-0.747593	3.5124	3.00637	5.38859	4.17525	8.62026	3.53168	4.06406	1.76251	2.70913	5.5236	-2.83288	3.28687	2.32553	3.55307	4.68416	3.06728	3.62972	-0.723308	0.110095	2.47488	4.7398	-1.92648	2.61084	4.41431	2.1179	5.88444	1.63852	3.71124	2.24193	5.09456	0.637264	-6.11439	2.85236	-1.34057	1.779	-4.13623	5.59838	3.31976	-0.963051	4.23028	-2.02846	4.78446	2.29687	3.63919	3.5426	6.70958	0.0256133	0.737359
TCGA-KK-A7B4-01A	-0.829005	3.91704	2.90792	5.38334	4.34961	8.20489	3.29557	4.26152	1.80247	3.03365	5.29139	-2.77062	3.51582	2.9336	4.21569	5.21388	3.31278	3.27583	-0.122626	0.429211	2.37412	4.94043	-1.84101	2.17118	4.4869	2.14707	5.86735	0.822737	4.0715	3.03021	5.09656	1.04293	-5.31365	3.02294	-1.15561	2.65627	-3.8737	5.6535	3.28015	-0.384295	4.27375	-1.45102	4.82995	3.26701	3.90517	3.65104	6.74052	0.444348	2.28043
TCGA-KK-A8I4-01A	-0.667979	3.51944	3.03587	5.38228	3.98331	7.66335	3.7952	4.03872	1.74993	3.11189	5.13997	-2.91153	3.59875	1.60637	3.59279	4.32455	2.97981	3.30172	-0.346893	0.284031	2.17084	4.98019	-1.54652	2.38945	4.45469	2.52447	5.88409	1.1645	3.56862	1.9028	4.94553	0.44851	-6.04173	2.70741	-1.36959	1.59707	-4.40348	5.5795	3.86882	-0.477001	4.00391	-1.99181	4.73043	1.82634	3.32667	3.69871	6.65336	-0.0146575	0.131612
TCGA-KK-A8I5-01A	-0.524854	3.608	3.12563	5.49727	4.45905	8.65919	3.9043	4.31914	1.77692	3.10174	5.63941	-2.87437	3.60008	2.60325	3.87811	5.12227	2.99812	3.79062	0.171822	0.409016	2.71678	4.64343	-1.44183	2.64063	4.35222	2.70075	5.90421	1.73199	3.80395	2.57007	4.85158	1.38312	-5.09157	3.3013	-1.31729	2.23149	-3.77268	5.62747	3.64805	-0.10765	4.4386	-1.47559	4.72888	2.56893	3.63747	3.80251	6.63625	0.606547	1.66106
TCGA-KK-A8I6-01A	-0.680062	4.01485	3.00917	5.42405	4.46173	8.50723	3.4545	4.26564	1.79998	3.08131	5.39339	-2.80611	3.58465	3.48113	4.32095	5.17305	3.14177	3.63201	0.4039	0.334367	2.52433	4.89503	-1.70725	2.15262	4.448	2.603	5.86677	1.93361	3.92384	2.8915	5.01026	1.41338	-5.12457	2.94604	-1.18159	3.0664	-3.56738	5.61935	3.03208	0.044835	4.38172	-1.4287	4.80676	2.85264	3.77386	3.75305	6.71915	0.752533	2.49377
TCGA-KK-A8I7-01A	-0.675492	3.30953	3.0847	5.4627	4.02363	8.34166	3.50822	4.06157	1.75218	2.92967	5.35124	-2.91076	3.58754	2.3757	3.52511	4.82974	2.97476	3.18702	-0.0311469	0.374502	2.38715	4.53303	-1.70423	2.32863	4.39389	2.66739	5.90618	1.18985	3.50898	2.13138	4.89615	0.516562	-5.83986	2.85985	-1.38831	2.01953	-3.86656	5.59176	3.24348	-0.575295	4.10396	-1.8602	4.72934	2.16617	3.45692	3.53603	6.66773	0.418669	0.347468
TCGA-KK-A8I8-01A	-0.593637	4.32381	2.8812	5.40413	3.99386	8.36656	3.88532	4.13783	1.80647	2.78294	5.01118	-2.83729	3.16624	2.61939	4.6259	4.52227	3.31468	4.26446	-0.413031	0.442485	1.78861	5.04568	-1.7525	2.18426	4.51065	2.14289	5.77848	0.106028	3.92508	3.34203	4.87041	1.01813	-4.45897	2.52698	-1.09638	2.40434	-4.69478	5.64201	2.83911	-0.581566	4.6185	-0.909234	4.83674	2.98911	3.23635	3.74891	6.71828	-0.298045	3.70833
TCGA-KK-A8I9-01A	-0.853507	3.35922	3.17082	5.42179	4.09296	7.86974	4.0693	4.20185	1.75839	2.94984	5.45382	-2.95443	3.73504	2.06431	3.75238	4.51236	2.90667	3.57263	-0.415657	0.356565	2.57305	4.76698	-2.03433	2.39664	4.42777	2.1928	5.88783	1.36404	3.62384	1.99791	4.93123	0.814347	-6.26695	2.74962	-1.50816	1.94667	-4.6672	5.66624	3.18235	-0.685957	4.10511	-1.97126	4.73564	1.80915	3.26312	3.46749	6.65369	0.200865	0.223468
TCGA-KK-A8IA-01A	-0.823228	4.1157	2.90231	5.41289	4.68449	8.67856	2.99745	4.23622	1.8067	2.98723	5.38063	-2.79004	3.58232	3.89593	4.42231	4.9453	3.32898	3.47548	0.223575	0.604708	2.34493	4.72223	-1.62108	2.29607	4.45443	2.57733	5.85078	0.761404	4.07868	3.46002	5.03418	2.2555	-4.86423	2.99509	-1.06916	3.16408	-3.53844	5.60105	3.4753	0.307206	4.36049	-1.3828	4.83838	3.24443	4.00324	3.72617	6.74592	1.15639	3.13154
TCGA-KK-A8IB-01A	-0.729056	3.54131	3.16862	5.49432	4.31152	7.95	3.66439	4.19003	1.77662	3.1157	5.66323	-2.88748	3.85931	2.08685	3.89675	4.9493	2.93838	3.9203	-0.091635	0.439433	2.75431	4.82441	-1.7532	2.27413	4.38475	2.18158	5.92096	2.02028	3.60523	1.94075	4.85117	0.880701	-5.94585	3.30226	-1.4764	1.78925	-3.54383	5.697	3.45399	-0.551347	4.18114	-1.62334	4.76448	2.18826	3.87247	3.56592	6.66207	0.477469	0.8516
TCGA-KK-A8IC-01A	-0.785877	3.30736	3.09087	5.48563	4.27834	7.9714	3.52695	4.20498	1.75236	2.83163	5.59033	-2.93997	3.82071	2.17676	3.30808	4.99801	2.97762	3.29346	-0.564442	0.786345	2.51489	4.50798	-1.8944	2.69459	4.37959	2.57939	5.90231	1.02485	3.70264	2.07028	4.90133	0.357346	-6.21037	3.09599	-1.35034	2.22233	-3.37348	5.60753	3.55941	-0.0373257	4.13442	-2.03155	4.69087	2.0293	3.55727	3.58521	6.64181	0.641129	0.241477
TCGA-KK-A8ID-01A	-0.643644	4.48553	2.83263	5.4456	4.81665	8.43897	3.20107	4.26385	1.82852	3.44996	5.49393	-2.71619	3.25705	4.83972	3.96318	5.52914	3.40385	3.67555	0.695206	0.87511	2.84413	4.90525	-1.33539	2.63313	4.38647	2.93049	5.86388	2.35745	4.129	3.46321	5.02237	2.0311	-4.31399	3.69741	-1.03112	3.72154	-2.85712	5.60349	3.70202	0.905813	4.81053	-1.37204	4.86018	3.79264	3.90159	3.8754	6.78294	2.30734	3.95333
TCGA-KK-A8IF-01A	-0.601693	4.35963	3.04843	5.453	4.47362	8.40333	2.77114	4.2635	1.80783	2.84864	5.81316	-2.77483	3.77082	3.30204	5.17326	5.11192	3.12116	3.35867	0.347863	0.691377	2.81934	4.99815	-1.31351	2.22286	4.45904	2.84941	5.87439	1.40799	4.15421	3.25428	4.98691	2.52581	-4.99685	2.8135	-1.19888	3.44506	-3.24265	5.62492	3.46386	1.04346	4.70996	-1.26333	4.80431	2.92115	3.7534	3.68889	6.69688	1.05031	3.16202
TCGA-KK-A8IG-01A	-0.502901	3.50669	2.99291	5.5147	3.8959	8.31656	3.75122	4.03705	1.75581	3.10973	5.58698	-2.86358	3.76302	3.19072	3.48057	5.03282	3.09964	3.39585	0.604191	0.471053	2.94218	4.57956	-1.42473	2.84564	4.40348	2.63284	5.93958	2.27434	3.69574	2.45447	4.92531	0.724626	-5.54103	3.60828	-1.27299	1.8329	-2.89573	5.55107	3.56891	0.144672	4.2815	-1.56332	4.74544	2.8203	3.80876	3.73555	6.65473	1.37649	0.785976
TCGA-KK-A8IH-01A	-0.72597	3.96864	3.08239	5.37734	4.39548	8.16416	3.38868	4.28948	1.79781	3.33166	5.34409	-2.82274	3.68343	3.10284	4.0754	4.82303	3.00373	3.91746	0.230911	0.131909	2.95159	4.99285	-1.81205	1.80974	4.45438	2.64929	5.89328	1.77946	3.88754	2.50323	5.05468	1.21592	-5.52953	2.66942	-1.34044	2.73694	-3.84233	5.60522	3.54922	-0.0908119	4.62266	-1.51163	4.80173	2.10738	3.64847	3.65129	6.78348	0.84771	1.8431
TCGA-KK-A8II-01A	-0.505305	4.92853	2.98922	5.41337	4.8642	8.898	3.17869	4.36283	1.81769	3.06868	5.48846	-2.77419	3.42639	3.91591	5.03141	5.3472	3.20757	4.14691	0.361279	0.786972	2.45562	4.94067	-1.359	2.26745	4.43126	2.78782	5.81783	1.19418	4.47143	3.70597	5.01864	2.66182	-3.79878	2.91556	-1.11963	3.7869	-3.83452	5.63015	2.99658	0.754125	4.95769	-1.0893	4.80247	3.12291	3.89384	3.97181	6.80292	0.745933	4.57891
TCGA-KK-A8IJ-01A	-0.666454	3.92491	3.13727	5.5197	4.67302	9.00965	3.56487	4.29505	1.78104	3.42862	5.58772	-2.88269	3.57475	3.61249	3.97263	5.37534	3.07558	3.51398	0.697564	0.498546	3.03553	4.46358	-1.482	2.32691	4.31906	2.88366	5.90488	2.04592	4.00281	2.88281	4.92378	2.1951	-4.88396	3.45888	-1.31816	2.7329	-2.98799	5.61186	3.35091	0.26668	4.41894	-1.50462	4.74638	2.8711	4.10663	3.78506	6.72593	1.66714	2.44639
TCGA-KK-A8IK-01A	-0.729512	4.33871	2.85615	5.44697	4.55216	8.8809	3.04095	4.27148	1.84175	3.48764	5.55058	-2.64327	4.13543	3.36789	4.7855	5.116	3.27053	4.01484	0.370316	0.906929	3.2171	5.23793	-1.31376	1.95463	4.56282	3.09574	5.85513	1.45231	3.94713	3.28024	5.1079	2.4473	-4.8445	3.29879	-1.01749	3.34743	-3.32815	5.66213	4.3196	0.699521	4.57209	-1.15438	4.88643	3.15664	4.14589	3.78532	6.81637	0.867982	3.36846
TCGA-KK-A8IL-01A	-0.861728	3.58996	3.13658	5.46589	4.44106	7.73186	3.8354	4.32172	1.76376	3.12761	5.28358	-2.98837	3.56098	2.62348	3.79453	4.86635	2.91039	3.60973	-0.137496	0.493452	2.39439	4.7502	-2.1528	1.9418	4.41272	1.95995	5.86309	1.06331	3.71111	2.00518	4.75487	1.09471	-6.1224	2.54801	-1.43022	1.78415	-4.8492	5.67843	2.99451	-0.37174	4.21483	-1.84095	4.72592	1.76611	2.99932	3.46261	6.66772	0.193037	0.627195
TCGA-KK-A8IM-01A	-0.660324	3.79485	2.95345	5.44246	4.23843	8.14293	3.61993	4.29277	1.77841	3.10657	5.23855	-2.87245	3.38196	3.28421	3.89775	4.97661	3.13595	3.53297	-0.0270069	0.602638	2.29838	4.87627	-1.69674	2.33077	4.47218	2.64432	5.85971	0.992271	3.89839	2.72332	4.90998	0.918019	-5.06794	2.87319	-1.21303	2.33034	-4.0799	5.566	3.22144	-0.0507329	4.43655	-1.38028	4.76432	2.57296	3.32382	3.69391	6.6825	0.414552	1.98534
TCGA-M7-A71Y-01A	-0.846172	3.30464	3.07231	5.46232	4.13103	8.21143	3.75423	4.10078	1.76589	2.87702	5.07019	-2.89882	3.46582	3.16984	3.76295	4.84996	3.04197	3.64875	0.208526	0.40513	2.78617	4.79497	-2.10797	1.83719	4.4355	2.32246	5.86241	1.70778	3.59376	2.11991	4.9806	0.662367	-6.0883	2.75999	-1.37848	2.2932	-4.08742	5.58298	2.84399	-0.322961	3.97676	-1.74991	4.76445	2.65099	2.9323	3.59635	6.66576	0.21048	0.785994
TCGA-M7-A71Z-01A	-0.271163	4.33755	2.94439	5.35757	4.37981	8.73436	4.3342	3.89137	1.82056	3.32657	5.66824	-2.68968	3.27499	2.92466	4.21793	5.01148	3.1997	5.08571	-0.456071	0.488659	2.69268	5.15903	-1.21536	2.77522	4.46767	2.14961	5.8291	2.70858	4.0015	2.94855	5.0109	1.40886	-4.42681	3.18947	-1.19273	3.64574	-4.04341	5.6736	2.87508	-0.8664	4.90587	-0.959672	4.8857	3.01368	3.75493	3.85149	6.84983	-0.106335	3.50781
TCGA-M7-A720-01A	-0.649594	3.35999	3.05676	5.47729	4.45659	8.21944	3.50884	4.1457	1.76339	3.10904	5.36042	-2.86093	3.64749	3.32748	3.35224	5.26903	2.96157	3.35004	0.645716	0.698925	3.03346	4.7763	-1.80103	2.02328	4.3992	2.77421	5.90002	2.79787	3.7933	2.22881	4.94338	0.986629	-5.59363	2.9579	-1.34225	2.52011	-2.96956	5.56531	3.17786	0.40087	4.23485	-1.69829	4.73902	2.42821	3.38235	3.60056	6.70208	1.28594	0.599392
TCGA-M7-A721-01A	-0.661249	3.58206	3.10502	5.47955	4.38651	8.62563	3.49709	4.25292	1.77753	3.24676	5.56698	-2.82771	3.67307	3.20768	3.88427	5.23112	3.00248	3.54819	0.284997	0.551229	2.88457	4.6325	-1.50569	2.32515	4.37769	2.96202	5.93009	2.9757	3.76298	2.43649	4.99278	1.75833	-5.38514	3.17984	-1.27951	2.48635	-2.93349	5.61395	3.37753	0.188376	4.33209	-1.69864	4.75914	2.61529	3.95743	3.68593	6.69305	1.03737	1.29046
TCGA-M7-A722-01A	-0.561793	3.15624	2.96699	5.41132	3.75028	8.31155	4.13958	3.81266	1.81198	3.61689	5.74054	-2.72956	3.2695	3.1743	3.53192	4.54827	3.06714	5.1336	0.275058	0.0560441	3.37961	5.0793	-1.32755	2.21723	4.44236	2.10811	5.89429	4.41527	3.53155	2.1964	4.92899	2.01683	-5.62842	2.82062	-1.34827	2.39541	-4.44412	5.65569	2.95809	-0.936871	4.44627	-1.35669	4.89673	2.04677	3.03299	3.54694	6.75237	0.316716	0.831534
TCGA-M7-A723-01A	-0.646706	2.94133	3.12719	5.49163	3.95591	8.26049	3.65591	4.04571	1.74373	3.37968	5.58493	-2.93234	3.67462	2.87221	3.31162	4.74457	2.88384	3.4187	-0.185204	0.167115	3.32303	4.80592	-1.54672	2.3639	4.41847	2.41927	5.9478	2.35498	3.31959	1.65738	4.77554	0.902269	-6.61277	3.19557	-1.44558	1.63868	-4.14448	5.59425	3.49413	-0.742604	4.02598	-1.96439	4.74109	1.82216	2.95319	3.48962	6.65154	0.423113	-0.455372
TCGA-M7-A724-01A	-0.61373	4.49608	2.94846	5.37107	4.24146	8.33904	3.86184	3.95474	1.84377	3.42061	5.37528	-2.68449	3.47666	3.48102	5.02859	4.91169	3.30185	4.38552	0.697452	0.576465	2.54629	5.11188	-1.32272	1.90018	4.44741	2.26419	5.83023	1.80148	3.81443	3.08179	5.03151	3.11693	-4.42522	3.13506	-1.18144	3.35396	-3.81995	5.73505	2.82886	-0.31725	4.63024	-1.12123	4.93191	3.47303	4.09265	3.7611	6.83014	0.726064	4.37781
TCGA-M7-A725-01A	-1.0091	3.52853	3.0254	5.50026	4.84377	8.60372	2.92979	4.39859	1.82241	3.7385	5.54171	-2.7545	3.93945	3.83552	3.8543	5.44979	3.20396	3.26025	1.33824	0.639475	3.23316	5.23426	-1.59666	1.98381	4.38655	2.84832	5.91503	2.48241	4.03743	3.01338	4.93317	2.85566	-4.65293	3.88485	-1.19163	3.7421	-2.7797	5.63427	3.99904	1.61679	4.29389	-1.50424	4.83151	3.14266	4.15844	3.78992	6.73287	2.13761	2.27765
TCGA-MG-AAMC-01A	-0.478854	4.12726	2.95908	5.43889	4.12731	8.80576	3.69006	4.19492	1.81766	3.46269	5.69319	-2.76415	3.5328	3.7294	4.20902	5.15169	3.12752	4.50989	0.514945	0.605854	3.28779	5.02648	-1.07286	2.44266	4.43898	2.55394	5.87752	2.12494	3.99269	2.89862	4.8236	2.18409	-4.57788	3.44423	-1.25368	2.93248	-3.90159	5.61354	3.21096	-0.0604346	4.71957	-1.3032	4.8283	2.67078	3.57314	3.98964	6.75468	0.823358	3.0722
TCGA-QU-A6IL-01A	-0.698653	3.12494	3.11613	5.36781	3.9613	8.15896	3.75186	4.01084	1.80758	3.39503	5.60123	-2.74349	3.85424	2.97087	3.78093	4.58038	2.96355	4.64869	0.330333	0.633778	3.6508	5.03643	-1.84486	2.08806	4.51184	2.24589	5.90791	3.01447	3.6277	2.09185	4.95783	2.57258	-6.06513	3.14603	-1.40686	2.60394	-4.29089	5.66164	3.11267	-0.626032	4.08197	-1.66193	4.87442	2.30318	3.29944	3.5198	6.71541	0.345312	0.812915
TCGA-QU-A6IM-01A	-0.724069	2.75414	3.22001	5.35897	4.15854	8.46166	3.85774	3.86191	1.77884	3.63151	5.72869	-2.77044	3.80391	2.58761	3.48998	4.76015	2.76742	4.36515	0.201679	0.369231	4.20067	4.72469	-1.87712	2.03288	4.49382	2.29562	5.97399	4.44845	3.40708	1.29315	5.01181	2.15574	-7.16459	2.88089	-1.67804	2.16364	-4.07833	5.67674	2.98678	-0.990639	3.8032	-2.10039	4.84621	1.51236	3.28697	3.29527	6.69282	0.335272	-0.983978
TCGA-QU-A6IN-01A	-0.641151	3.50348	3.06163	5.34853	4.10588	7.9793	4.1395	3.94269	1.81235	3.34461	5.54715	-2.75127	3.51361	2.60334	3.72122	4.79602	2.99448	5.24648	0.0223278	0.203919	3.34992	4.88242	-1.88047	1.94738	4.50057	2.02302	5.88107	3.18144	3.55387	2.12084	5.06613	2.20216	-6.11343	2.61283	-1.37982	2.71042	-4.48508	5.68402	2.98493	-1.47528	4.23601	-1.43479	4.88494	2.13443	3.4414	3.50932	6.72742	-0.305195	1.36489
TCGA-QU-A6IO-01A	-0.724411	2.96653	3.19364	5.3645	4.28101	8.58756	3.59497	3.87516	1.78416	3.38491	5.65538	-2.76084	3.72908	3.05646	3.55456	4.83454	2.82923	4.33296	0.304486	0.430408	3.87528	4.76066	-1.83448	1.79698	4.47281	2.27066	5.94423	3.98969	3.46602	1.53328	5.01761	2.06143	-6.83404	2.87082	-1.54402	2.67425	-4.08334	5.66393	3.0195	-0.970436	3.93814	-1.96802	4.8534	2.01704	3.56341	3.38166	6.72651	0.260495	-0.383216
TCGA-QU-A6IP-01A	-0.655712	3.40708	3.05912	5.42079	4.2255	8.34378	3.55169	4.05525	1.77971	2.99559	5.44169	-2.83738	3.40374	2.80434	3.86367	5.10578	3.02038	3.58965	-0.0384144	0.409651	2.62932	4.77561	-1.74559	2.01156	4.42849	2.47288	5.89065	1.68051	3.64483	2.21853	5.02449	1.23143	-5.88706	2.8843	-1.3556	2.502	-3.94745	5.6044	3.04728	-0.434135	4.25327	-1.66476	4.78741	2.54901	3.51152	3.60059	6.67678	0.287499	1.17236
TCGA-SU-A7E7-01A	-0.692294	3.80437	3.02422	5.42556	4.29409	8.34839	3.5068	4.31346	1.76905	2.99414	5.25482	-2.89083	3.32448	3.24099	3.87889	4.98707	3.06985	3.26289	-0.303692	0.616373	2.22949	4.64894	-1.8974	2.39519	4.41019	2.47122	5.8546	0.713858	3.90197	2.69871	4.95487	0.879593	-5.26771	2.53449	-1.29079	2.17965	-4.08226	5.57697	3.09713	-0.279602	4.37829	-1.77254	4.74611	2.52772	3.27943	3.61203	6.73245	0.341216	1.8355
TCGA-TK-A8OK-01A	-0.399292	2.6893	2.88647	5.49577	3.21193	8.27053	4.08414	3.80613	1.69426	2.80942	5.23592	-2.97293	3.37235	2.63149	2.20613	4.52209	3.08412	2.88079	-0.54792	0.336419	2.65729	4.35198	-1.54329	3.08065	4.42336	2.60926	5.91246	1.1085	3.60351	2.22494	4.87234	-0.123237	-5.78918	3.28347	-1.33208	0.887378	-3.82993	5.46744	4.22441	-0.393896	4.03459	-2.03098	4.63745	2.11964	2.7516	3.55384	6.59339	0.448727	-1.47842
TCGA-TP-A8TT-01A	-0.508187	4.00895	3.05158	5.42154	4.42377	8.31326	3.74605	4.2888	1.75815	3.23527	5.41438	-2.89147	3.36201	3.40263	3.73718	4.80903	2.9758	3.86509	-0.339745	0.631836	2.51376	4.6719	-1.45724	2.5533	4.42744	2.92304	5.88347	1.85603	3.87945	2.53213	4.87262	0.740976	-5.0389	2.54771	-1.22394	2.26326	-4.30732	5.58465	3.70935	0.0075332	4.57575	-1.63621	4.7324	2.21829	3.18797	3.69555	6.76062	0.592867	1.63135
TCGA-TP-A8TV-01A	-0.616273	4.10659	3.1046	5.44689	4.47925	8.52727	3.28519	4.111	1.80752	3.1222	5.67555	-2.77259	3.61924	3.33557	4.48582	5.31087	3.12912	3.83845	0.663491	0.67062	2.69476	4.5075	-1.48202	2.19978	4.37661	2.95008	5.88085	2.75083	3.82556	2.804	5.07125	2.13892	-4.98261	3.20799	-1.25511	3.7806	-2.87451	5.63702	3.19195	0.499599	4.50301	-1.29152	4.82505	3.16748	4.15165	3.74374	6.72197	1.3662	2.73506
TCGA-V1-A8MF-01A	-0.43678	3.68823	3.10593	5.44844	4.04806	8.22013	3.46878	4.15676	1.7795	3.37493	5.45305	-2.83984	3.69948	2.80936	3.72899	4.93782	2.90689	3.64574	0.458847	0.390516	3.10299	4.78593	-1.33221	2.31429	4.37127	2.67257	5.90873	2.96468	3.65371	2.20267	4.77477	1.44925	-5.51831	3.24078	-1.44566	2.18886	-3.71428	5.62	3.67348	0.132905	4.21379	-1.40885	4.77417	2.17888	3.6765	3.7022	6.6897	0.90991	1.01734
TCGA-V1-A8MG-01A	-0.544918	3.72027	2.96376	5.37772	3.95447	8.37379	3.67499	4.03123	1.76829	2.75208	5.11586	-2.84455	3.39315	2.86349	4.12237	4.5503	3.10619	3.5356	-0.0472798	0.404957	2.36318	4.80969	-1.64606	2.02497	4.47335	2.54816	5.84875	1.28908	3.80089	2.57288	5.00517	0.73075	-5.35061	2.49406	-1.23251	2.19339	-4.17309	5.5717	3.2672	-0.0285891	4.42355	-1.43011	4.77662	2.53056	3.21708	3.5913	6.71386	0.423888	1.38409
TCGA-V1-A8MK-01A	-0.600435	3.41208	3.03932	5.4759	4.12725	8.47589	3.66352	4.07611	1.7575	3.09738	5.35845	-2.8864	3.4402	3.15315	3.59404	4.96427	3.06403	3.36405	0.374209	0.273203	2.81503	4.62202	-1.65572	2.23788	4.41326	2.67226	5.90082	2.01555	3.6399	2.28927	4.96735	0.897125	-5.76649	3.08383	-1.33598	2.13232	-3.54963	5.56282	3.34986	0.0392743	4.23637	-1.68322	4.73675	2.6739	3.3294	3.61395	6.6586	0.743013	0.851096
TCGA-V1-A8ML-01A	-0.511095	3.71042	3.00468	5.46524	3.83232	8.98816	3.86146	4.12579	1.77475	3.40929	5.61521	-2.8429	3.27902	3.08132	4.0053	4.88843	3.10524	3.81329	0.0133855	0.170868	2.93958	4.73875	-1.37287	2.63129	4.41917	2.49332	5.91245	2.34232	3.75151	2.65704	4.87439	1.76491	-5.3282	3.21182	-1.27083	2.16483	-3.91643	5.58957	3.17469	-0.586533	4.34988	-1.32474	4.78295	2.71108	3.50789	3.709	6.69414	0.533876	1.60953
TCGA-V1-A8MM-01A	-0.538003	3.7095	3.0194	5.36424	3.93081	8.43433	4.00306	4.0107	1.77598	3.0205	5.47265	-2.80056	3.43938	3.02012	3.97	4.58407	3.03538	3.70692	-0.295362	0.358831	2.72251	4.90162	-1.49165	2.51139	4.44207	2.66765	5.88565	2.18724	3.68436	2.39653	4.99722	0.954694	-5.38262	2.5753	-1.32359	2.2331	-4.48769	5.58897	3.47123	-0.760066	4.3735	-1.67376	4.80111	2.37114	3.35615	3.56372	6.72211	0.372562	1.39617
TCGA-V1-A8MU-01A	-0.683208	3.31821	3.05083	5.41618	4.08639	8.26122	3.95251	4.05473	1.74827	2.91935	5.29834	-2.89727	3.51904	2.42931	3.61381	4.63418	2.99421	3.59355	-0.0298548	0.397981	2.60617	4.67945	-1.85424	2.38082	4.44405	2.61245	5.90384	1.58208	3.54798	1.99155	4.96948	0.571292	-6.04043	2.95282	-1.37912	1.85163	-3.90801	5.58612	3.31588	-0.458876	4.20255	-1.92702	4.73492	2.1783	3.43951	3.51444	6.67289	0.520043	0.37647
TCGA-V1-A8WL-01A	-0.692443	3.69137	3.07593	5.46393	4.34719	8.03849	3.69338	4.25062	1.77506	3.33714	5.24437	-2.8812	3.52894	3.18762	3.85111	4.83135	3.01942	3.5991	0.218812	0.42069	2.78733	4.76027	-1.76034	2.15898	4.43662	2.70294	5.89278	1.42417	3.61514	2.21834	4.89064	1.08235	-5.73152	3.08718	-1.3061	2.46222	-3.90188	5.58671	3.50218	0.0471054	4.29144	-1.55513	4.76621	2.51983	3.41479	3.6596	6.67902	0.630105	1.37601
TCGA-V1-A8WN-01A	-0.519067	3.7982	2.96611	5.47807	4.22206	8.60703	3.5623	4.24919	1.76447	3.07619	5.31318	-2.87479	3.38106	3.63327	3.64347	5.12941	3.10345	3.27675	0.352292	0.551469	2.61634	4.56707	-1.4854	2.21567	4.38289	2.79078	5.88493	1.54369	3.959	2.80043	4.95186	0.967886	-4.84083	2.84974	-1.23851	2.0983	-3.55994	5.53783	3.50327	0.433317	4.44541	-1.52301	4.71932	2.75561	3.39317	3.74145	6.70923	0.966184	1.55844
TCGA-V1-A8WS-01A	-0.503341	4.17599	2.83558	5.38497	4.23063	7.84945	3.68639	4.13472	1.80894	2.80782	5.19615	-2.80591	3.03091	3.08537	4.05058	5.00167	3.30978	3.86509	-0.224029	0.389384	1.88075	4.81626	-1.69711	2.39646	4.49179	2.33791	5.78626	0.637069	4.0578	3.30178	4.9981	0.793163	-4.35853	2.57057	-1.10728	2.39862	-3.83157	5.62401	3.08574	-0.129706	4.75113	-1.14097	4.81984	3.14324	3.25082	3.83814	6.6827	0.335443	3.20069
TCGA-V1-A8WV-01A	-0.724672	3.49537	2.90082	5.33702	4.23878	7.87944	3.16661	4.22212	1.78618	2.38925	5.08178	-2.79755	3.53238	1.6442	3.80046	4.26005	3.10832	3.43018	-0.31188	0.708986	2.08127	4.9004	-1.84445	1.84436	4.58086	2.19831	5.86618	0.384832	3.57446	2.12019	4.99938	-0.255209	-6.60783	2.23994	-1.23134	1.7333	-4.57208	5.62115	3.53919	-0.373844	4.19983	-1.75214	4.82841	1.91105	3.22486	3.47818	6.66988	0.123409	0.575748
TCGA-V1-A8WW-01A	-0.796407	3.80898	3.12597	5.44511	5.25549	8.69262	3.78293	4.41241	1.78752	3.56845	5.99475	-2.77237	4.18467	3.06975	3.99556	5.49595	2.98823	3.92969	0.29884	0.958001	3.5677	5.03573	-1.51685	2.39589	4.4618	3.24226	5.96482	3.34659	4.17379	2.63057	5.07331	1.73671	-5.63955	3.72173	-1.26936	3.96431	-2.62645	5.62518	3.66918	1.16856	4.47028	-1.93407	4.7673	2.53605	4.36382	3.71509	6.74306	1.54586	1.31549
TCGA-V1-A8X3-01A	-0.557553	3.42127	3.01169	5.47627	4.30562	8.75408	3.52487	4.22537	1.76174	2.96893	5.47649	-2.8796	3.21442	3.13138	3.88565	4.9878	3.12995	3.21695	0.419489	0.479183	2.32256	4.53693	-1.58682	2.72184	4.39503	2.63473	5.90278	1.694	3.70638	2.64513	4.94094	0.39171	-5.14124	3.2581	-1.23946	2.13468	-3.4904	5.58109	3.48626	0.0869283	4.28064	-1.56756	4.74195	2.87107	3.57973	3.65012	6.6477	0.817205	1.68045
TCGA-V1-A9O5-01A	-1.02346	3.39977	2.99105	5.40499	4.97157	8.85291	3.43215	4.39219	1.79176	3.40031	5.42975	-2.74779	4.0767	2.86088	4.11394	5.04583	3.22319	3.41301	0.840308	0.745883	3.02543	5.19638	-1.927	2.34465	4.47017	2.28282	5.92426	2.45781	4.20905	3.0059	5.16323	2.16994	-6.05731	3.22521	-1.23291	2.18482	-3.32247	5.68029	3.08221	0.744715	3.84712	-2.05706	4.84919	2.7549	3.55458	3.51867	6.65351	1.69778	0.2235
TCGA-V1-A9O7-01A	-0.57934	3.56691	2.95496	5.49045	3.68118	8.0662	3.71135	4.16399	1.74594	2.95688	5.09913	-2.89102	3.5883	2.62512	3.2455	4.95415	3.11422	3.27698	0.148874	0.458611	2.60306	4.64455	-1.76408	2.59558	4.45548	2.39603	5.90216	1.46087	3.79714	2.41992	4.934	-0.197418	-5.83462	3.61117	-1.36975	1.46506	-3.05416	5.5607	3.75462	0.390432	4.05578	-1.60667	4.73201	2.73142	3.64228	3.55959	6.63773	0.626837	0.20671
TCGA-V1-A9O9-01A	-0.72388	4.17153	2.97545	5.38232	4.2991	7.61191	3.56189	4.35109	1.78576	3.20331	5.2555	-2.84651	3.33108	3.08367	4.00393	4.73066	3.08288	3.78613	-0.454305	0.469468	2.00156	4.9148	-1.87099	2.552	4.46204	2.40528	5.86626	1.60079	3.79784	2.42141	4.91577	0.373038	-5.20852	2.60592	-1.20135	2.00594	-4.67859	5.6113	3.33023	-0.523278	4.40132	-1.71929	4.79499	2.29651	3.31757	3.67386	6.7344	0.1879	2.01467
TCGA-V1-A9OA-01A	-0.554128	3.20672	2.87478	5.43145	3.32997	8.32854	3.61659	4.1214	1.7394	2.85379	5.19059	-2.8894	3.21446	3.1708	2.90787	4.67281	3.07526	3.25849	-0.445358	0.346183	2.33648	4.71581	-1.58187	2.15974	4.43152	2.75104	5.88426	1.45572	3.69366	2.27826	4.93241	-0.353981	-5.42551	2.38609	-1.29985	1.45134	-4.0921	5.48642	3.5435	-0.57951	4.2643	-1.63746	4.72977	2.22838	2.74365	3.57867	6.65295	0.230514	-0.105046
TCGA-V1-A9OF-01A	-0.535434	4.0104	2.93876	5.44779	4.33807	8.16326	3.29917	4.21636	1.80741	3.2313	5.38066	-2.76614	3.50555	3.86692	4.21034	5.2675	3.15801	4.08814	0.352701	0.429176	2.79457	4.85841	-1.34461	1.86932	4.45371	3.01893	5.87485	2.23121	3.86261	2.86831	4.96366	2.18412	-4.74543	2.89342	-1.1089	3.50199	-3.46824	5.59136	3.15156	0.486747	4.77539	-1.03194	4.83293	3.00561	3.3506	3.82133	6.75063	0.894676	2.65461
TCGA-V1-A9OH-01A	-0.744257	3.16456	3.03185	5.47624	4.21734	8.40164	3.64092	4.15655	1.77228	3.16219	5.56017	-2.88743	3.43138	3.03018	3.49831	4.98311	3.07635	3.48041	-0.0881917	0.512288	2.4261	4.75079	-1.69678	2.45812	4.37943	2.67698	5.89695	1.4572	3.58469	2.34166	4.90425	1.14134	-5.19684	3.10955	-1.24276	2.00859	-3.70064	5.60486	3.59812	-0.20184	4.16763	-1.66581	4.76779	2.49933	3.36322	3.6196	6.64418	0.549779	1.20726
TCGA-V1-A9OL-01A	-0.89679	3.7297	2.93191	5.42404	4.4749	8.22498	3.33338	4.12169	1.79515	3.13762	5.23534	-2.79978	3.56933	4.09993	4.3502	5.09683	3.36417	3.27363	0.209207	0.601931	2.4347	4.85524	-1.73892	2.43494	4.42225	2.29504	5.85305	1.88043	3.88267	2.90389	5.1133	1.77486	-5.35806	3.47746	-1.13761	3.23245	-3.81482	5.63517	3.2939	0.749521	4.23342	-2.10356	4.83492	3.42043	4.09888	3.55325	6.75918	1.22988	2.12572
TCGA-V1-A9OQ-01A	-0.544944	3.24273	3.09249	5.51806	3.97366	8.18025	3.6251	4.11432	1.77891	3.41449	5.70901	-2.83954	3.68519	3.24359	3.54794	4.95803	2.98903	4.08018	0.529816	0.244101	3.08161	4.66907	-1.37752	2.40447	4.36748	2.83087	5.93693	3.14161	3.38738	2.06416	4.87298	1.56572	-5.67709	3.44829	-1.30633	1.95502	-3.25673	5.62268	3.36762	-0.125411	4.23459	-1.54032	4.78389	2.58212	3.73396	3.6451	6.62368	0.937218	0.832297
TCGA-V1-A9OT-01A	-0.286184	3.57448	2.81531	5.28934	3.33735	8.3708	3.7851	3.9212	1.77615	3.24125	5.33653	-2.73414	3.02375	2.66576	3.05364	4.5508	3.04184	4.1325	-0.654772	0.731343	2.75117	4.81269	-1.33617	2.31163	4.48429	2.59422	5.86962	2.14703	3.81334	2.41176	4.9459	0.700797	-5.21425	2.38086	-1.33779	1.71729	-4.44255	5.51876	3.27349	-1.10352	4.51356	-1.59565	4.8171	1.84826	3.07024	3.61764	6.75669	0.0868486	0.614325
TCGA-V1-A9OX-01A	-0.700535	3.39536	3.08547	5.4241	4.1709	8.36627	3.64797	4.08939	1.77608	3.18949	5.49656	-2.81267	3.71617	2.89955	3.80687	4.95185	2.94331	3.59113	0.146727	0.538786	3.26148	4.75937	-1.66767	2.06036	4.42862	2.65821	5.92235	2.83907	3.67031	2.05236	4.98829	1.56839	-6.05032	2.94573	-1.46778	2.3301	-3.65146	5.58471	3.00542	-0.33827	4.16605	-1.82768	4.78934	2.13582	3.49959	3.57707	6.70513	0.794346	0.608759
TCGA-V1-A9OY-01A	-0.757412	3.39287	3.02516	5.42979	4.16914	8.42114	3.75941	4.07784	1.76834	2.86277	5.3727	-2.87396	3.33955	2.68325	3.74379	4.79755	3.09088	3.63548	-0.365633	0.194645	2.3365	4.7382	-1.87823	2.24928	4.42816	2.41847	5.87844	1.1456	3.65321	2.26993	4.98862	0.361398	-5.82934	2.73912	-1.36093	2.21915	-4.13767	5.59488	2.96537	-0.802234	4.29179	-1.75176	4.77953	2.57319	3.47536	3.5928	6.7115	0.21532	1.23736
TCGA-V1-A9Z7-01A	-0.309069	3.70196	2.83666	5.46766	3.56053	8.81442	3.96631	4.03357	1.75898	3.31757	5.37437	-2.84452	3.27302	2.15729	3.60853	4.57388	3.18636	3.71744	-0.533437	0.127815	2.47477	4.69762	-1.11001	2.89985	4.47734	2.44895	5.90623	1.85657	3.58542	2.63249	4.8486	0.608048	-5.15507	3.42645	-1.10675	1.54202	-3.98329	5.61327	4.13001	-0.393233	4.43059	-1.14805	4.76985	2.56382	3.51736	3.69982	6.66504	0.424177	0.908304
TCGA-V1-A9Z8-01A	-0.79526	2.67927	3.03418	5.4804	3.81345	8.25879	3.75374	4.0488	1.74463	2.97906	5.37433	-2.91835	3.72888	2.63023	3.046	4.84083	3.05779	3.40636	-0.344806	0.4322	2.70579	4.66192	-2.00599	2.23857	4.45012	2.49874	5.91944	1.39684	3.40594	1.85126	4.95982	0.611679	-6.36195	3.02479	-1.31523	2.17126	-4.42212	5.59658	3.42318	-0.32135	4.03549	-2.02155	4.72788	2.37265	2.68621	3.48501	6.59237	0.0935176	-0.382166
TCGA-V1-A9Z9-01A	-0.689775	3.17189	3.0723	5.48916	4.12669	8.39889	3.67969	4.08439	1.76548	3.05524	5.48078	-2.8649	3.49995	3.17366	3.70783	4.97844	3.06719	3.54544	0.23498	0.310797	2.70312	4.54065	-1.60652	2.27779	4.39535	2.71414	5.92103	2.51785	3.62459	2.32896	4.99112	1.40569	-5.7933	3.18084	-1.31151	2.45962	-3.45732	5.60351	3.16693	-0.0550518	4.25233	-1.60323	4.76405	2.76264	3.66408	3.59857	6.66415	0.678309	0.707868
TCGA-V1-A9ZG-01A	-0.652873	3.34224	3.07208	5.50463	4.06046	8.80769	3.65737	4.18113	1.75307	3.04617	5.50421	-2.93836	3.43034	2.69947	3.40434	4.53854	3.03681	3.79954	-0.454211	0.0981091	2.35389	4.47633	-1.68198	2.39951	4.35494	2.44196	5.88059	1.42052	3.66228	2.38786	4.90477	1.03532	-5.51179	2.69778	-1.34637	1.6331	-3.99327	5.61953	3.09209	-0.45668	4.3992	-1.66594	4.71338	2.18304	3.158	3.73362	6.69606	0.0723762	0.867309
TCGA-V1-A9ZI-01A	-0.382193	3.90931	2.88429	5.33828	3.84482	8.85223	3.75547	4.07608	1.77926	3.09945	5.37087	-2.74901	3.56198	1.69233	4.06769	4.22825	3.12487	3.67216	-0.41912	0.561719	2.72427	5.0267	-1.38377	2.48528	4.56291	2.35195	5.88997	1.76394	3.83646	2.6059	4.91206	1.0438	-5.34794	2.70008	-1.2316	1.91789	-4.19731	5.58962	3.83627	-0.688953	4.33829	-1.41577	4.81119	2.22399	3.21982	3.73091	6.7196	0.294789	1.41958
TCGA-V1-A9ZK-01A	-0.720862	3.68592	3.03553	5.52108	4.52877	8.71489	3.2714	4.23	1.77947	3.22036	5.52579	-2.85284	3.7828	3.72928	3.83032	5.2869	3.08556	3.34191	0.56207	0.490592	2.94134	4.73227	-1.49189	2.16819	4.36361	2.84681	5.92589	2.15164	3.89947	2.71349	4.96917	1.53096	-5.06058	3.33647	-1.23469	2.75527	-2.91764	5.57517	3.49099	0.593679	4.38155	-1.56291	4.75724	2.84412	3.64519	3.72603	6.72535	1.55209	1.52698
TCGA-V1-A9ZR-01A	-0.525774	3.29084	2.973	5.39176	3.65684	7.60328	3.87712	3.94373	1.72676	2.48929	4.978	-2.96148	3.09824	1.97476	3.4152	4.17971	3.01461	3.46136	-0.591848	0.337401	1.91323	4.74181	-1.86954	2.39638	4.48496	2.51506	5.84903	0.74742	3.46096	2.1127	4.97784	-0.347636	-5.88254	2.31445	-1.35036	1.48459	-4.55501	5.52594	3.06656	-0.789821	4.10062	-1.87817	4.71054	1.9475	2.98251	3.4473	6.6155	-0.161843	0.190607
TCGA-VN-A88I-01A	-0.561697	2.53475	3.01124	5.41745	3.34297	7.9778	4.14999	3.81377	1.69031	2.60595	5.12567	-3.00608	3.41982	1.60602	2.36211	4.25498	2.92735	3.12511	-0.56648	0.359156	2.45961	4.47353	-2.10459	2.50605	4.47109	2.28931	5.91558	0.916238	3.33012	1.40306	4.94853	-1.35968	-6.8408	2.7892	-1.52777	1.14416	-4.0304	5.51751	3.19659	-0.734422	3.82009	-2.32723	4.6613	1.83655	2.92797	3.19506	6.59673	0.0221054	-2.15694
TCGA-VN-A88K-01A	-0.629022	3.95646	3.05958	5.45967	4.17269	8.3654	3.80357	4.09863	1.77891	2.47357	5.43771	-2.89608	3.36354	2.35806	4.11465	4.74291	3.18128	3.82337	-0.180405	0.132373	2.292	4.53848	-1.64022	2.75809	4.39564	2.35516	5.83106	0.0492614	3.6697	2.73912	5.08925	0.441451	-5.37032	3.1951	-1.27165	2.34448	-4.38045	5.62124	3.43089	-0.870539	4.16182	-1.62526	4.7682	2.92638	3.50209	3.78141	6.67642	0.198205	2.20755
TCGA-VN-A88L-01A	-0.43722	3.21203	2.95337	5.47598	4.07046	8.83978	3.80984	3.93096	1.76265	3.03225	5.68231	-2.83824	3.34842	2.39589	2.83954	5.02969	3.04886	4.02094	-0.500417	-0.039539	2.93144	4.5527	-1.27717	2.92779	4.39794	2.77906	5.91674	1.80709	3.69328	2.39515	4.90258	0.467853	-5.33853	3.17649	-1.30546	1.6417	-3.53949	5.58729	3.83127	-0.747898	4.56925	-1.5667	4.74599	2.24891	3.80727	3.76065	6.73939	0.264656	0.783096
TCGA-VN-A88M-01A	-0.492	3.81008	2.94966	5.39284	4.03165	8.57156	3.69875	4.09297	1.81252	3.26063	5.49101	-2.75087	3.31067	2.83739	3.6333	5.14469	3.06289	4.31031	-0.153172	0.505348	2.83152	4.97824	-1.35872	2.32564	4.42376	2.56793	5.87257	1.57065	3.84552	2.62699	4.88228	1.76692	-4.82077	2.80657	-1.28147	2.50241	-3.92684	5.63539	3.3106	-0.584408	4.56374	-1.3453	4.83268	2.52598	3.6744	3.8389	6.76204	0.3122	2.22643
TCGA-VN-A88N-01A	-0.782992	3.83108	3.04211	5.46178	4.4448	8.61629	3.30772	4.17124	1.80989	3.47713	5.46358	-2.78762	3.60624	4.43413	4.18635	5.27921	3.16522	3.67567	0.86358	0.482931	3.04428	4.72943	-1.48201	1.88254	4.38907	2.93868	5.88635	2.05724	3.91552	2.94142	5.02496	2.7067	-4.82523	2.98704	-1.20961	3.14878	-3.16583	5.59887	2.88952	0.435606	4.51704	-1.58082	4.81124	3.18703	3.92537	3.82093	6.75881	1.47973	2.89701
TCGA-VN-A88O-01A	-0.528361	4.03502	3.02597	5.44167	4.2723	8.22728	3.73041	4.21377	1.79187	3.31735	5.47239	-2.8084	3.56617	3.50833	3.98941	5.11555	3.08948	3.84857	0.483543	0.452211	2.95303	4.77403	-1.34197	2.24031	4.41616	2.63459	5.89972	2.06863	3.9116	2.73984	4.9486	2.06122	-5.04818	3.32636	-1.23652	2.79776	-3.53606	5.59582	3.27712	0.0536992	4.62334	-1.34288	4.79621	2.99309	3.85436	3.75686	6.75776	1.25234	2.14978
TCGA-VN-A88P-01A	-0.553749	3.82776	3.03812	5.48761	4.28673	7.96925	3.96715	4.24794	1.78354	3.0589	5.34543	-2.86321	3.40111	3.02265	3.88622	4.78884	3.11199	3.90268	0.307131	0.320972	2.50178	4.75687	-1.67111	2.47817	4.46862	2.36949	5.88092	1.36788	3.70289	2.53014	4.88079	0.770506	-5.56274	3.38453	-1.20256	2.04349	-3.55742	5.62749	3.6309	-0.0423079	4.33919	-1.33262	4.77104	2.86597	3.95891	3.72839	6.62015	0.815158	1.96276
TCGA-VN-A88Q-01A	-0.521428	4.55091	2.92741	5.42204	4.38526	8.74584	3.59159	4.34737	1.8065	3.07499	5.40112	-2.81515	3.22799	3.35038	4.33575	5.06302	3.19918	4.29597	0.22431	0.261662	2.19236	4.88713	-1.43423	2.31612	4.47981	2.20564	5.81976	0.835202	4.25931	3.4873	4.9387	1.55088	-4.29334	2.74714	-1.19319	2.34813	-3.97625	5.60719	2.85387	-0.523003	4.76012	-1.11122	4.80528	2.87229	3.30481	4.02041	6.73253	0.222476	3.53878
TCGA-VN-A88R-01A	-0.747004	3.7782	3.1675	5.51077	4.24245	9.0035	3.74886	4.00928	1.78173	3.20968	5.73504	-2.85235	3.73134	3.33355	4.7175	4.95603	3.11613	3.7966	0.82463	0.146017	3.0001	4.54007	-1.55307	2.59176	4.40041	2.24742	5.89984	3.08017	3.66734	2.58658	4.96361	2.15392	-5.57778	3.55441	-1.45235	2.79829	-3.81942	5.65216	2.9832	-0.621979	4.26725	-1.64258	4.80616	2.98842	3.88576	3.7256	6.68943	0.638698	2.17593
TCGA-VN-A943-01A	-0.517432	4.57457	3.09864	5.48677	4.55111	8.65923	3.43913	4.29048	1.82556	3.49255	5.60983	-2.77087	3.50886	4.37341	4.69376	5.66551	3.15218	4.14074	1.27267	0.535703	2.90752	4.71394	-1.26903	1.88833	4.37371	3.03341	5.88079	3.10222	4.08172	3.37645	4.99243	3.27461	-4.14438	3.23013	-1.15054	4.15079	-2.37944	5.63217	3.16282	1.03508	4.74401	-0.836597	4.82983	3.51656	4.42367	3.91512	6.7656	1.96473	4.12052
TCGA-VP-A872-01A	-0.858822	3.16515	3.2366	5.44082	4.9074	8.14048	3.40749	4.06808	1.76164	3.09154	5.48343	-2.85758	4.02001	2.49731	3.60347	5.28004	2.85647	3.43135	0.181985	0.4521	3.40282	4.66113	-1.92989	1.66767	4.45366	2.77029	5.94855	2.75853	3.60315	1.55601	5.07049	0.901454	-6.85939	3.24421	-1.47922	2.69824	-3.27542	5.66745	3.54035	0.480641	3.97735	-2.26696	4.74194	2.13331	4.14866	3.43065	6.68607	0.755448	-0.923568
TCGA-VP-A875-01A	-0.545411	4.68695	2.87241	5.39875	4.32747	8.29946	3.54109	4.37217	1.83085	2.79432	5.27573	-2.76907	3.36684	3.85804	4.52644	5.18721	3.30839	3.98715	0.363021	0.349847	1.90125	5.057	-1.30057	2.2122	4.42112	2.56455	5.80016	1.32709	4.16224	3.52597	5.03005	0.932476	-3.78472	2.72235	-1.02409	2.93172	-3.71347	5.57749	3.22361	0.166277	4.91205	-0.71191	4.85358	3.35354	4.17214	3.95031	6.77061	0.735158	4.3875
TCGA-VP-A876-01A	-0.467309	4.07782	2.74458	5.39341	4.24396	8.16264	3.65645	4.26792	1.83284	3.23753	5.17291	-2.72944	3.32114	3.42339	4.30297	5.13551	3.34731	4.22148	0.580927	0.413012	2.10169	4.98559	-1.32016	2.21172	4.51588	2.55324	5.82572	1.23562	4.00265	3.29582	4.95351	1.20558	-3.80637	3.41959	-1.00269	2.74641	-3.54251	5.61064	3.33833	0.0668467	4.95924	-0.668434	4.86375	3.49975	3.65706	4.00307	6.77181	1.05017	3.57951
TCGA-VP-A878-01A	-0.737619	3.30825	3.11945	5.45893	4.15897	7.87766	3.67195	4.08924	1.7624	2.9902	5.50127	-2.88795	3.68038	2.43299	3.6433	4.96564	2.92237	3.44213	-0.0244703	0.322494	2.82826	4.61358	-1.8847	2.37597	4.40452	2.62126	5.90029	2.25546	3.5829	1.98076	4.95395	0.828374	-6.06748	2.94377	-1.41759	2.36842	-3.72847	5.62073	3.19121	-0.279425	4.17183	-1.83599	4.74564	1.98774	3.55018	3.49975	6.6653	0.466895	0.294185
TCGA-VP-A879-01A	-0.465328	3.52406	2.99852	5.42465	4.25112	8.62243	3.58968	4.0583	1.75168	2.80649	5.41012	-2.85736	3.33195	3.28026	3.65277	5.08022	3.07193	3.30327	0.137644	0.521111	2.67086	4.65881	-1.55957	2.38626	4.41388	2.85392	5.88306	1.80247	3.88817	2.60281	5.0317	1.07501	-5.10581	2.92039	-1.29079	2.26053	-3.10201	5.53442	3.3046	-0.0244933	4.4017	-1.64472	4.73088	2.73922	3.72407	3.63437	6.6918	0.946189	1.25514
TCGA-VP-A87B-01A	-0.423761	4.0758	2.97173	5.39737	4.49161	8.37291	3.64482	4.20367	1.80646	3.34994	5.66931	-2.69407	3.52406	2.76527	4.27451	5.14761	3.04679	4.08486	0.050488	0.722532	3.08355	4.69822	-1.29101	2.36305	4.43489	2.83671	5.91913	3.46941	4.02929	2.66846	5.14896	2.06601	-4.67178	2.99992	-1.24251	2.66142	-2.89636	5.61135	3.70249	-0.105016	4.68562	-1.12475	4.8298	2.55843	3.9801	3.83102	6.73035	1.1896	2.33654
TCGA-VP-A87C-01A	-0.797761	3.48629	3.01732	5.38457	4.14253	7.28853	3.90993	4.36425	1.74892	3.18461	5.00571	-2.94333	3.43955	2.25925	3.58887	4.36719	2.94817	3.28166	-0.946894	0.421536	1.88875	4.80917	-2.11298	2.58439	4.50202	2.56174	5.88887	0.076478	3.56784	1.76918	4.93318	-0.788137	-5.91451	2.45754	-1.3403	1.50502	-5.13628	5.59381	3.63362	-0.744432	3.91085	-2.22508	4.73671	1.63837	2.66452	3.42326	6.68462	-0.308895	0.137314
TCGA-VP-A87D-01A	-0.501032	4.33049	2.84503	5.41643	4.39557	8.92012	3.40338	4.22001	1.80189	2.91854	5.36606	-2.80205	3.21977	3.72215	3.99721	5.48193	3.31205	4.07619	0.120331	0.481427	2.17896	4.75237	-1.4302	2.41849	4.43611	2.65353	5.82245	1.00971	4.17736	3.45145	4.93236	1.2979	-3.97091	3.04526	-1.08836	3.07724	-2.80026	5.54649	3.32686	0.461208	4.86253	-1.08332	4.81098	3.2933	4.25172	3.78541	6.76252	1.55055	3.75451
TCGA-VP-A87E-01A	-0.521359	3.61835	3.12478	5.4974	4.18887	7.53454	3.8178	4.20256	1.74854	3.30953	5.40852	-2.90184	3.62215	2.9855	3.35519	4.98705	2.86687	3.40204	0.179732	0.541735	2.98944	4.43957	-1.73385	2.46314	4.38154	2.56404	5.94591	2.06594	3.63386	1.93778	4.85254	0.130042	-5.74719	3.40808	-1.44525	1.51428	-2.69962	5.58741	3.56613	0.267315	3.96592	-1.94794	4.70815	2.29186	3.86093	3.52897	6.62492	1.24077	0.0891383
TCGA-VP-A87H-01A	-0.733054	3.55232	3.06756	5.4401	4.33402	8.48532	3.33471	4.28688	1.79869	2.68471	5.58715	-2.8088	3.68877	2.2255	4.23616	5.15518	3.02172	3.9079	-0.195573	0.715104	2.14379	4.72981	-1.66919	2.13159	4.34983	2.63321	5.90161	0.61774	3.90925	2.42417	5.04391	0.779562	-5.76932	2.65458	-1.34086	2.59075	-3.66913	5.66389	3.42052	0.267454	4.40663	-1.37465	4.79217	2.36101	3.74123	3.61923	6.66272	0.142876	1.49141
TCGA-VP-A87J-01A	-0.682745	3.89989	3.11097	5.51944	4.79925	9.15925	3.40287	4.41348	1.79869	3.61014	5.60075	-2.82582	3.48017	4.21198	4.24887	5.31882	3.10102	3.682	0.890194	0.777749	3.3343	4.62381	-1.45337	2.71999	4.34659	2.7503	5.89591	2.57474	4.0666	3.00572	4.88796	2.87572	-4.57199	3.46285	-1.29461	2.98808	-3.15965	5.61026	3.48082	1.0923	4.42716	-1.58195	4.76197	3.00016	4.06703	3.90129	6.68133	1.55744	2.87104
TCGA-VP-A87K-01A	-0.526962	4.66123	2.89959	5.3888	4.57287	8.77914	3.57348	4.20181	1.81308	2.88319	5.29273	-2.76432	3.34826	3.49881	4.89613	5.13809	3.28139	3.96585	0.368333	0.431333	2.19697	4.85285	-1.41538	2.55199	4.44412	2.34515	5.79799	0.875082	4.19851	3.48146	5.06933	1.14547	-4.3283	3.04305	-1.09785	3.21668	-3.82036	5.61857	3.08215	-0.00329034	4.90689	-1.03882	4.83944	3.51359	3.99671	3.92378	6.79905	0.606304	4.06024
TCGA-VP-AA1N-01A	-0.738878	3.74327	3.11625	5.55102	4.61377	8.61648	3.91407	4.23236	1.77924	3.33615	5.60709	-2.83215	4.08647	3.18168	4.46929	5.12325	3.0639	3.75482	0.81785	0.550277	3.50261	4.87928	-1.36058	2.30373	4.4173	2.7513	5.9651	2.69173	3.86927	2.60751	5.03255	2.38131	-5.72183	3.55434	-1.43285	2.80552	-2.93947	5.62219	3.34707	0.345335	4.23704	-1.63744	4.77296	2.60401	3.84172	3.71872	6.69893	1.45718	1.2784
TCGA-WW-A8ZI-01A	-0.256981	4.60971	2.84748	5.39375	4.31141	8.15886	3.60475	4.21642	1.80936	3.18508	5.18168	-2.74083	3.2831	3.83338	4.28919	5.07715	3.20938	3.92243	0.571611	0.579717	2.31852	5.14711	-1.0134	1.94446	4.44597	3.04812	5.85141	1.78074	4.13798	3.28793	4.94658	1.64181	-4.03233	2.86885	-1.00305	3.21987	-3.48094	5.56274	3.57376	1.07894	5.17901	-0.89509	4.81972	3.19757	3.67664	3.95473	6.79511	1.47724	3.52029
TCGA-X4-A8KQ-01A	-0.638847	3.00297	2.96833	5.41944	3.72655	8.10034	3.66495	4.00367	1.76076	2.90032	5.35518	-2.89676	3.79263	2.17231	3.32248	4.4937	2.96623	3.27911	-0.230262	0.563528	2.73309	4.906	-1.51307	2.34714	4.43586	2.16756	5.91686	0.691659	3.69787	2.02161	4.81368	-0.00617279	-5.89236	2.88569	-1.45522	1.55603	-4.34225	5.56405	3.30909	-0.661709	4.18083	-1.92834	4.74752	1.68678	2.95654	3.6546	6.69552	0.497269	0.0723135
TCGA-X4-A8KS-01A	-0.490918	2.92346	2.91122	5.36753	3.30445	8.13769	3.49444	4.02624	1.77626	3.70215	5.33339	-2.77991	3.33922	3.19591	2.70477	4.6408	2.89276	3.57222	-0.0645502	0.766686	3.32713	4.91577	-1.37734	1.91558	4.47648	2.59584	5.9192	2.54769	3.59073	1.91964	4.79129	0.975028	-5.67254	2.57582	-1.38035	1.33518	-4.3721	5.52661	3.46604	-0.505358	4.09083	-1.81201	4.79752	1.33383	2.69829	3.59525	6.68739	0.337502	-0.563486
TCGA-XA-A8JR-01A	-0.532039	3.40261	3.0964	5.48079	4.18362	8.27355	3.60066	4.2143	1.77054	3.12556	5.53762	-2.87177	3.62303	3.19116	3.66577	5.04514	2.9611	3.51093	0.176606	0.584396	2.79277	4.70347	-1.49492	2.17562	4.39344	2.74381	5.91664	1.75405	3.71906	2.28784	4.88234	1.29854	-5.55307	3.28443	-1.31032	2.38444	-3.68169	5.57756	3.38553	0.0989204	4.40846	-1.49524	4.73899	2.5658	3.58983	3.62639	6.67701	0.813151	1.14275
TCGA-XJ-A83F-01A	-0.640358	3.49848	3.03777	5.42651	4.19344	8.8411	3.49372	4.00711	1.78822	2.88133	5.62837	-2.83224	3.31581	2.81144	3.66814	5.09363	3.11724	4.09457	-0.154009	0.433875	2.65218	4.66646	-1.66642	2.60954	4.38878	2.58082	5.86725	1.30154	3.62902	2.37112	5.01688	0.956013	-5.52275	3.13988	-1.32871	2.44949	-3.92124	5.62712	3.33756	-0.736182	4.4193	-1.61238	4.80893	2.62379	3.51631	3.72804	6.67856	0.134558	1.86946
TCGA-XJ-A83G-01A	-0.744872	3.61411	3.14266	5.46967	4.61029	8.73555	3.27612	4.10797	1.80494	3.38169	5.72446	-2.75579	3.73428	3.60469	4.1418	5.23067	3.0376	3.777	0.802793	0.453647	3.38725	4.6604	-1.51952	1.92854	4.39041	2.67591	5.91685	3.38834	3.66838	2.39836	5.01093	2.32524	-5.49172	3.26997	-1.34151	3.19888	-2.9719	5.65322	3.19609	0.00733797	4.22902	-1.61428	4.83463	2.96794	4.12266	3.7325	6.7223	1.2395	1.63573
TCGA-XJ-A83H-01A	-0.7785	3.83359	3.08395	5.49386	4.54761	8.61339	3.20734	4.34712	1.7961	3.23601	5.47065	-2.84735	3.69285	3.57863	4.24303	5.03825	2.9926	3.22174	0.429631	0.59639	2.80537	4.76035	-1.55779	1.78704	4.33651	2.34558	5.89284	1.58888	3.97784	2.67914	4.91075	2.04667	-5.33583	2.66596	-1.35004	2.00712	-3.67565	5.61345	3.27051	0.253277	4.29907	-1.67752	4.76189	2.27806	3.84113	3.78157	6.73241	0.862071	1.68266
TCGA-XJ-A9DI-01A	-0.81575	3.33964	3.01513	5.36038	3.92161	7.77253	3.83998	4.15107	1.74041	2.55476	4.9249	-2.95845	3.58141	2.41458	3.39001	4.12763	2.95486	3.20614	-0.524392	0.555136	1.93435	4.72109	-2.25604	1.87716	4.48067	2.29638	5.84064	0.16625	3.67944	2.05112	5.00375	-0.642878	-6.13936	1.9393	-1.39132	1.68363	-4.65676	5.53712	2.99729	-0.558009	4.01537	-2.03681	4.72192	1.7294	2.87662	3.43408	6.68326	0.185109	-0.13015
TCGA-XJ-A9DK-01A	-0.664848	3.80276	2.97127	5.43064	4.21049	8.17815	3.72802	4.07789	1.7692	3.07193	4.96098	-2.87061	3.32903	3.20318	3.87848	4.97187	3.08299	3.74281	0.276656	0.506733	2.74466	4.93732	-1.85714	1.82726	4.47169	2.57184	5.85492	1.82727	3.825	2.46503	4.96452	0.711988	-5.80592	2.63133	-1.27996	2.48857	-4.05949	5.56406	3.01057	0.230361	4.30362	-1.5854	4.75924	2.43439	3.06297	3.63691	6.70861	0.347294	1.41981
TCGA-XJ-A9DQ-01A	-0.610168	3.55912	2.97151	5.41099	3.94773	8.33167	3.50764	3.99468	1.7721	2.92425	5.26459	-2.83579	3.36221	3.01466	3.62899	4.86369	3.06172	3.506	0.00954443	0.407235	2.81738	4.77658	-1.74426	2.13354	4.44763	2.60296	5.86022	1.65914	3.68736	2.34614	4.98231	0.545596	-5.63841	2.72248	-1.32317	2.41301	-3.93943	5.54628	3.04518	-0.338094	4.2701	-1.70599	4.7773	2.49384	3.20938	3.65533	6.71519	0.412922	1.19036
TCGA-XJ-A9DX-01A	-0.414355	4.63771	2.93964	5.34935	4.26301	8.50303	3.73835	4.12493	1.79426	2.73095	5.32118	-2.77927	3.24503	3.71529	4.61059	4.71057	3.20166	3.53223	-0.172735	0.525913	2.37502	4.8159	-0.977851	2.49264	4.44269	2.43172	5.79793	1.56886	4.32321	3.50145	5.01213	0.358893	-4.1673	2.28794	-1.23558	2.73177	-3.90481	5.52753	3.22811	-0.330675	4.5859	-1.66361	4.82796	2.95966	3.47477	3.92223	6.78674	0.904345	3.7225
TCGA-XK-AAIR-01A	-0.623492	3.51444	3.01237	5.4601	4.31545	8.20432	3.39533	4.16471	1.76751	3.10796	5.24368	-2.87688	3.40592	3.90318	3.7854	4.78534	3.04236	3.29107	0.183675	0.518078	2.48165	4.81111	-1.60526	1.917	4.43203	3.01665	5.87932	1.58542	3.70213	2.54593	4.90922	0.935244	-5.06025	2.59772	-1.197	2.25194	-3.66451	5.54162	3.31921	0.206095	4.41139	-1.58897	4.74142	2.36085	3.39537	3.63215	6.69222	0.831873	1.37866
TCGA-XK-AAIV-01A	-1.12685	3.35096	3.02728	5.41253	4.56449	7.42531	2.96621	4.24871	1.79398	3.57521	4.96499	-2.82457	3.68871	2.9274	3.69306	5.05803	3.15469	3.85428	0.0623384	0.443367	2.26138	4.99727	-2.16429	2.35566	4.46352	2.40153	5.86895	1.60459	3.66443	2.28534	5.03184	1.09607	-6.34046	2.62075	-1.16602	2.53783	-3.71908	5.69887	3.65642	0.859777	3.53271	-2.02176	4.84246	2.55909	3.37628	3.31193	6.62656	0.63265	0.247044
TCGA-XK-AAIW-01A	-0.706868	4.44706	2.72317	5.35992	4.06964	7.88154	3.46603	4.27431	1.83336	3.67402	5.24365	-2.7177	3.00949	3.07316	4.94878	5.09558	3.49031	4.33685	-0.346739	0.621849	1.72429	4.97456	-1.75446	2.61746	4.52196	2.10892	5.82367	1.19154	3.84737	3.27692	5.10826	1.73607	-4.4936	3.04194	-0.944864	2.36948	-4.90789	5.72368	2.58254	-0.056256	4.41072	-1.56305	4.90124	3.03021	2.76897	3.74084	6.71786	-0.151701	4.348
TCGA-XK-AAJ3-01A	-0.577575	3.74015	3.01616	5.43925	4.4984	8.89182	3.46405	4.07467	1.79088	3.15524	5.60257	-2.7542	3.60752	2.83111	4.34594	5.28481	3.12999	3.71348	0.421691	0.614849	3.0556	4.78173	-1.38432	2.24175	4.47503	2.90412	5.91227	3.20811	3.88555	2.66952	5.13897	1.96569	-5.36729	3.38722	-1.22784	3.31108	-3.21258	5.60661	3.17583	0.200874	4.50398	-1.25042	4.82217	2.91484	3.90648	3.74362	6.69461	1.14603	1.93212
TCGA-XK-AAJA-01A	-0.614382	4.1262	2.95719	5.3487	4.59169	8.35554	3.73736	4.23606	1.81401	3.11918	5.39969	-2.70453	3.50367	3.19637	4.41984	5.23232	3.11042	4.00573	0.734938	0.754094	2.93004	5.03371	-1.66229	2.23004	4.44772	2.82899	5.86664	2.33662	4.12303	2.82851	5.14611	1.87979	-4.87228	3.00308	-1.23668	3.40618	-3.17974	5.59525	3.16695	0.269761	4.56445	-1.49392	4.84342	2.7431	4.04705	3.8114	6.77603	1.27282	2.82154
TCGA-XK-AAJP-01A	-0.640505	3.9898	2.98576	5.4515	4.50568	8.49384	3.3827	4.21131	1.80474	3.5062	5.51359	-2.7702	3.45697	4.13155	4.5913	5.07599	3.14496	3.5973	0.253836	0.435977	2.82567	4.73777	-1.24659	2.22948	4.41995	2.85582	5.8857	2.323	3.85864	2.96206	4.97324	2.07831	-4.25458	3.25501	-1.18109	3.04553	-3.69019	5.63165	3.45295	-0.0984553	4.48016	-1.4236	4.82426	2.829	3.95306	3.71886	6.73819	0.79189	2.71052
TCGA-XK-AAJR-01A	-0.679301	3.69631	3.01595	5.48444	4.2129	9.10554	3.71331	4.17334	1.772	3.24001	5.48486	-2.83964	3.45795	3.58471	4.02527	4.96425	3.12774	3.7125	0.123138	0.467961	2.80838	4.54463	-1.64836	2.50372	4.39152	2.57185	5.9027	1.80577	3.81152	2.75247	4.96702	1.52809	-5.04367	3.08133	-1.25795	2.46808	-3.39241	5.61058	3.06423	-0.301576	4.32962	-1.65544	4.76634	2.79711	3.74276	3.71055	6.75713	0.776385	1.71707
TCGA-XK-AAJT-01A	-0.683634	2.94025	3.03052	5.44344	3.96618	8.27641	3.96099	3.93885	1.74187	3.12027	5.32479	-2.8982	3.62225	2.43645	2.95019	4.73272	2.97166	3.66718	-0.0419244	0.467329	3.034	4.73819	-1.88347	2.14778	4.44495	2.47473	5.91845	2.16513	3.57195	1.93023	4.96264	0.803082	-6.4878	3.20784	-1.42126	1.90031	-3.74826	5.55424	3.49437	-0.150843	3.94013	-1.93874	4.73937	2.04135	2.97249	3.41726	6.64698	0.707438	-0.557689
TCGA-XK-AAJU-01A	-0.745314	3.57204	3.05078	5.41741	4.33514	8.22885	3.70602	4.09465	1.76537	2.95797	5.08288	-2.88092	3.49787	3.13888	3.77417	4.94431	3.02774	3.58101	0.29162	0.510322	2.57224	4.77075	-1.96869	1.75591	4.44643	2.56627	5.86764	1.90105	3.74894	2.27588	5.02443	1.19416	-6.03089	2.59805	-1.3323	2.37494	-3.79211	5.56641	2.98712	0.0420505	4.19177	-1.80298	4.7577	2.4367	3.15263	3.5698	6.70562	0.581169	1.00213
TCGA-XK-AAK1-01A	-0.750898	3.60055	3.19056	5.48754	4.48567	8.62557	3.57735	4.07247	1.80153	3.34277	5.70611	-2.81311	3.67968	3.47324	4.12904	5.22658	3.02781	4.30693	0.547181	0.343616	3.03125	4.65474	-1.61471	2.10875	4.35683	2.56252	5.91774	3.53348	3.60998	2.3595	5.03329	2.57888	-5.73442	3.38062	-1.32492	3.22469	-3.52395	5.66285	2.88729	-0.0249242	4.27755	-1.44979	4.83128	2.93979	4.04379	3.7063	6.71933	1.04797	1.69493
TCGA-XQ-A8TA-01A	-0.770689	4.90751	2.39047	5.2934	4.73306	7.77953	3.857	4.20383	1.87191	3.69758	4.81668	-2.50215	3.26977	3.61942	5.01612	5.75974	3.73014	5.49434	-0.00127278	1.60062	2.41329	5.81989	-1.89388	2.33922	4.61685	2.49496	5.73213	2.43792	4.26192	3.69796	5.24349	0.583862	-4.31636	3.14119	-0.772559	4.87136	-3.17347	5.65595	3.13847	2.0897	4.4937	-1.35925	5.01844	3.35925	3.91068	3.57583	6.83441	1.27895	4.42551
TCGA-XQ-A8TB-01A	-0.436916	3.77923	2.92563	5.4746	3.9999	8.3415	3.9378	4.174	1.76382	2.89251	5.40327	-2.88581	3.21648	2.71247	3.31838	5.04017	3.13129	3.89086	-0.471564	0.502268	1.94974	4.66044	-1.33527	2.65655	4.38424	2.81073	5.86542	0.704823	3.86605	2.76648	4.91111	0.445519	-4.84388	2.84552	-1.19577	1.8281	-3.90831	5.56058	3.66399	-0.342136	4.60153	-1.31878	4.7287	2.55968	3.40875	3.77061	6.66653	-0.0649373	1.52601
TCGA-Y6-A8TL-01A	-0.606353	3.5643	3.05537	5.46905	4.15378	8.34352	3.59337	4.10957	1.7745	3.2028	5.5192	-2.85463	3.39641	3.06349	3.95624	5.15048	3.06718	3.72231	0.231107	0.367313	2.6573	4.61118	-1.6317	2.24287	4.39287	2.75652	5.89458	2.23979	3.63556	2.41872	5.00048	1.41488	-5.52732	3.18028	-1.26705	2.38871	-3.49123	5.6047	3.2981	0.0343151	4.42987	-1.42345	4.76886	2.68051	3.51483	3.6555	6.66174	0.65196	1.423
TCGA-Y6-A9XI-01A	-0.741646	4.23519	2.99017	5.42055	4.54921	8.66411	3.38497	4.18558	1.80864	3.29239	5.37762	-2.78189	3.52525	4.06184	4.43335	5.15822	3.1614	3.91643	0.769684	0.545172	2.60984	4.85295	-1.56893	2.16196	4.39512	2.97773	5.85773	1.58427	3.97725	3.08457	5.06059	2.19267	-4.64517	3.13425	-1.14829	3.48272	-3.21376	5.60329	3.2354	0.454219	4.64731	-1.35121	4.8189	3.03499	4.15501	3.76743	6.8145	1.34047	3.40681
TCGA-YJ-A8SW-01A	-0.736025	4.4754	2.94124	5.47311	4.64284	7.92721	3.5893	4.17773	1.80634	3.60989	5.59599	-2.74508	3.53725	4.41034	4.22418	5.48338	3.2875	3.97774	-0.00568776	0.854855	3.29512	4.99562	-1.49015	2.50266	4.39078	2.63123	5.87378	3.1721	4.46515	3.68517	5.03847	3.39667	-3.9985	2.88854	-1.02243	3.44768	-2.64451	5.62189	3.60528	1.21112	4.48363	-1.45731	4.80189	3.10628	3.39878	3.69193	6.7865	1.67311	3.31844
TCGA-YL-A8HJ-01A	-0.457458	3.22894	2.92258	5.43126	3.50074	7.76728	3.89599	4.07005	1.72525	2.84941	5.24287	-2.92593	3.21004	2.56158	2.86697	4.65969	3.04655	3.08638	-0.523529	0.491627	2.06699	4.46672	-1.69649	2.87176	4.42211	2.79705	5.91429	0.925358	3.57402	2.09346	4.89909	-0.726752	-5.40791	3.02395	-1.31097	1.08739	-3.56975	5.52845	3.58118	-0.368574	4.15957	-1.88481	4.69676	2.08429	3.3629	3.52983	6.6094	0.355437	-0.273925
TCGA-YL-A8HK-01A	-0.626396	3.73112	2.95978	5.45294	4.31539	8.05554	3.66124	4.23086	1.76105	2.89565	5.34643	-2.87043	3.61188	2.76441	3.57939	5.17101	3.10674	3.2186	-0.120432	0.743637	2.52734	4.71427	-1.75639	2.64884	4.44122	2.55089	5.8779	1.3638	3.88919	2.59663	5.01042	0.323257	-5.32812	3.30441	-1.30477	2.16951	-2.93837	5.58654	3.32956	0.0142812	4.20836	-1.85934	4.72858	2.60385	4.35129	3.52892	6.66297	0.956952	1.08791
TCGA-YL-A8HL-01A	-0.527607	4.47067	2.96214	5.46915	4.73675	9.0447	3.38935	4.3159	1.80236	3.30352	5.37707	-2.77546	3.58892	4.34266	4.14558	5.51591	3.2499	3.66651	0.7998	0.628364	3.16728	4.72154	-1.11565	2.27096	4.39697	2.92527	5.85798	1.80236	4.35234	3.61425	4.99186	2.76237	-4.06006	3.17623	-1.1007	3.43811	-2.84909	5.588	3.44179	0.777646	4.64922	-1.1845	4.78362	3.63707	4.53758	3.98744	6.83481	1.54429	3.31209
TCGA-YL-A8HM-01A	-0.707999	3.85587	2.98666	5.44022	4.42373	8.18025	2.93694	4.31367	1.82236	3.71623	5.43418	-2.72897	3.84957	3.391	4.78509	5.23615	3.184	3.73215	0.979454	0.888157	2.54814	5.12652	-1.46562	1.9894	4.54601	2.70042	5.91583	3.04561	3.75477	2.55078	4.93352	2.33414	-5.84416	3.24322	-1.11422	3.5395	-3.53809	5.66443	3.44791	0.967208	4.39309	-1.36585	4.86257	2.86483	3.52991	3.80715	6.63401	1.05972	2.27474
TCGA-YL-A8HO-01A	-0.586521	3.08887	2.94404	5.43537	3.80338	8.12735	3.58233	3.95544	1.74211	3.1131	5.27753	-2.87716	3.59291	2.0706	3.58181	4.50138	3.01221	2.96037	-0.0273226	0.271253	2.8967	4.77884	-1.54923	2.42917	4.51092	2.50551	5.94461	2.15255	3.44464	1.84768	4.97954	0.238223	-6.68822	3.02326	-1.36302	1.58003	-3.84949	5.56686	3.56397	-0.423218	4.1497	-1.87963	4.74273	1.94804	3.0108	3.43641	6.64507	0.399331	-0.429515
TCGA-YL-A8S8-01A	-0.567451	3.60391	2.91663	5.44545	4.2225	8.14471	3.89748	4.17985	1.78407	3.05046	5.47535	-2.77113	3.80085	2.51038	3.92033	5.03989	3.13693	3.6552	-0.0730736	0.806066	2.46211	4.62048	-1.35612	2.41238	4.46176	2.78805	5.90406	1.84545	4.00989	2.7155	5.0417	1.45741	-4.99337	3.02831	-1.24171	2.66245	-3.31037	5.59318	3.7523	0.271697	4.54113	-1.41873	4.78244	2.57855	4.02526	3.65317	6.72156	1.09771	1.50228
TCGA-YL-A8S9-01A	-0.528569	4.55251	2.87776	5.42471	4.03595	8.54847	2.70725	4.20915	1.83728	3.60954	5.52986	-2.70184	3.38487	4.67779	4.53475	5.13348	3.31489	3.69356	0.78417	0.682644	2.74699	5.15337	-1.17891	2.23619	4.44624	3.10288	5.8418	1.85617	4.15813	3.81828	4.88629	3.2637	-3.34603	2.89607	-0.909732	3.28189	-3.31964	5.60596	3.63627	0.912886	4.80737	-0.929134	4.86001	3.37966	3.61696	4.0189	6.79377	1.28009	4.28448
TCGA-YL-A8SA-01A	-0.667399	3.88276	3.11072	5.42801	5.37497	8.98375	2.95119	4.25918	1.79971	3.13403	5.75767	-2.78559	3.81241	4.11099	3.79974	5.64216	3.08646	3.48686	0.835414	1.04402	2.93658	4.56431	-1.4027	2.32857	4.34708	3.34886	5.90628	2.54082	4.15165	3.02979	5.07006	2.59487	-4.5277	3.43906	-1.26044	3.58717	-2.26357	5.59807	3.63156	1.03333	4.69738	-1.64784	4.78663	3.07764	4.52349	3.87726	6.77565	2.22528	2.94455
TCGA-YL-A8SB-01A	-0.618392	3.11118	2.9008	5.43886	3.71152	8.11918	3.55564	4.03133	1.7501	3.08621	5.21371	-2.88578	3.40837	3.05862	3.30871	4.99132	3.12112	3.09839	-0.165375	0.268217	2.61976	4.64165	-1.59778	2.23756	4.45125	2.84448	5.89913	1.28781	3.61095	2.3288	4.97255	0.569384	-5.81214	2.86317	-1.18398	1.76846	-3.87841	5.53151	3.49968	0.0889194	4.32317	-1.71384	4.7354	2.4025	3.16834	3.55537	6.66345	0.651406	0.268166
TCGA-YL-A8SC-01A	-0.582661	4.57477	2.96833	5.41442	4.56334	8.33959	3.72998	4.41572	1.79617	3.41439	5.42896	-2.83134	3.53994	3.6785	4.68359	4.91662	3.20259	3.67088	0.499495	0.819261	2.45967	5.15966	-1.52944	2.83844	4.49335	2.18143	5.86143	2.04162	4.18864	3.30563	4.90173	1.55237	-4.56042	3.23172	-1.20346	2.76608	-4.4759	5.60692	3.25788	0.165348	4.42407	-1.4766	4.79928	2.70098	3.85248	3.7732	6.78894	1.04314	3.613
TCGA-YL-A8SI-01A	-0.502529	3.3447	3.03814	5.49373	3.86806	8.12192	3.52047	4.06605	1.75004	3.10606	5.48081	-2.88806	3.51897	3.08656	3.49906	5.00779	3.04111	3.2662	0.460327	0.336969	2.73567	4.5512	-1.44269	2.33846	4.39274	2.72235	5.92371	2.14538	3.58202	2.29089	4.92809	0.695826	-5.61963	3.41899	-1.29393	2.16669	-3.1364	5.57377	3.34684	0.184306	4.25386	-1.63976	4.73111	2.81708	3.5579	3.57721	6.65055	1.05969	0.478532
TCGA-YL-A9WH-01A	-0.83482	3.64906	2.96033	5.43495	4.64315	7.9464	3.72207	4.15919	1.81001	3.51856	5.73972	-2.7588	3.79637	3.14737	4.04722	5.58606	3.14406	3.55691	0.178142	0.897354	2.57115	5.25448	-1.55201	2.04645	4.50273	2.48827	5.9269	2.77518	3.9989	2.53995	5.02092	1.72388	-5.82189	2.57444	-1.11478	4.12383	-3.57298	5.64697	3.21124	0.835252	4.58184	-1.74321	4.82078	2.58433	4.19386	3.54319	6.73769	1.03589	2.16489
TCGA-YL-A9WI-01A	-0.754806	3.78321	2.97629	5.44513	4.48333	8.13075	3.58438	4.22947	1.81792	3.14852	5.6359	-2.74086	3.64234	3.09692	4.62822	5.05814	3.20598	4.00377	0.344065	0.482484	2.38562	4.91248	-1.4994	2.30622	4.39074	2.58148	5.9002	2.8875	3.76388	2.79687	5.0553	2.98825	-5.13678	3.13093	-1.02509	2.7338	-3.24899	5.64471	3.81423	0.801784	4.38853	-1.23703	4.83049	2.91237	3.76221	3.75799	6.67914	1.10884	2.65138
TCGA-YL-A9WJ-01A	-0.742498	3.67295	3.13211	5.47775	4.2595	8.07797	3.39948	4.25798	1.7728	3.03519	5.33281	-2.87733	3.64866	2.75758	3.74463	5.19779	2.9628	3.28354	0.114516	0.654276	2.66885	4.66641	-1.82002	2.09914	4.37002	2.60259	5.89762	2.22854	3.76119	2.40534	4.97182	1.38809	-5.68473	3.00107	-1.34873	2.47693	-3.33323	5.61684	3.40301	0.0870074	4.03374	-1.82834	4.74142	2.38886	3.99838	3.53074	6.64857	0.735325	1.0175
TCGA-YL-A9WK-01A	-0.41348	3.65015	2.92625	5.41556	3.88222	8.57791	3.74618	3.93324	1.75955	2.84802	5.25689	-2.86094	3.53003	1.76767	3.90236	4.41511	3.12263	3.55644	0.228686	0.189651	2.25298	4.92967	-1.19172	2.72355	4.4389	2.37826	5.86748	1.0131	3.72397	2.70847	4.94331	0.390004	-5.26208	3.15325	-1.23647	1.59995	-3.81786	5.60484	4.17353	0.0769442	4.40109	-1.31756	4.78661	2.31129	3.77897	3.71614	6.68587	0.730675	1.18927
TCGA-YL-A9WL-01A	-0.49246	4.74783	2.77634	5.3929	4.44662	8.27295	4.23811	4.18115	1.82529	3.29499	5.55205	-2.68569	3.61029	2.81476	4.70909	5.2956	3.30977	4.74231	-0.18015	0.664555	2.79726	5.22792	-1.41407	2.44079	4.61937	2.43217	5.85505	2.15004	4.38522	3.77139	5.01501	1.92478	-3.73577	3.16797	-1.03365	3.57454	-3.50641	5.61561	2.86901	-0.102172	4.77624	-1.24894	4.86297	3.02379	4.16525	3.88196	6.8148	0.815644	4.41871
TCGA-YL-A9WX-01A	-0.718052	3.78597	3.04785	5.43025	4.26174	8.07923	3.60498	4.26346	1.75848	2.9946	5.13903	-2.89621	3.38707	3.20036	3.67887	4.94373	3.02491	3.14649	-0.137934	0.541864	2.45155	4.68654	-1.90254	2.3088	4.42974	2.63576	5.8646	1.21989	3.83789	2.37967	4.99551	0.433238	-5.6071	2.74435	-1.36885	1.92294	-3.71352	5.55226	3.33532	-0.220059	4.29464	-1.91558	4.72707	2.34143	3.65643	3.59824	6.72209	0.653589	1.12579
TCGA-YL-A9WY-01A	-0.758731	3.44851	2.97163	5.43827	4.18196	7.90536	3.67991	4.25339	1.75498	3.2375	5.12694	-2.88827	3.62022	2.82282	3.55337	4.7851	3.10112	3.23561	0.14236	0.531176	2.26877	4.79805	-1.96976	2.34626	4.52273	2.24957	5.89716	1.32092	3.5658	2.21293	4.93671	-0.0452201	-6.30794	2.99544	-1.25029	1.97265	-4.17275	5.6149	3.62083	-0.199118	3.88381	-2.0367	4.75961	2.40979	3.58743	3.41078	6.66449	0.684238	0.373957
TCGA-ZG-A8QW-01A	-0.738929	3.25195	3.02674	5.42892	4.19277	7.58767	3.9154	4.1695	1.77894	3.30575	5.17338	-2.83995	3.58349	2.7654	3.89997	4.61639	3.02826	3.97593	0.0796148	0.0356399	2.83804	5.01224	-1.7093	1.86304	4.46097	2.15463	5.9065	1.98884	3.61244	2.03575	4.90833	0.848417	-6.1433	2.7638	-1.2752	2.22096	-4.50091	5.65325	3.23746	0.154129	4.21132	-1.80544	4.79876	2.15209	3.08325	3.50781	6.66714	0.256196	0.250022
TCGA-ZG-A8QX-01A	-0.458288	3.68781	2.94817	5.51421	3.95787	7.97664	3.74941	4.08954	1.78257	3.41462	5.36065	-2.80781	3.69511	3.68012	3.72644	5.06088	3.1326	3.85648	0.806187	0.387027	2.9583	4.60991	-1.46272	2.32566	4.43254	2.58136	5.91483	1.95824	3.74566	2.59152	4.85819	0.984854	-5.26773	3.90154	-1.19057	2.47508	-2.88134	5.5794	3.25261	0.800203	4.17333	-1.35493	4.79807	3.18952	3.78998	3.69054	6.65647	1.29375	1.67266
TCGA-ZG-A8QY-01A	-0.301038	3.59836	2.88774	5.46207	3.80822	8.5976	4.08732	3.92171	1.76357	3.26701	5.48666	-2.8249	3.46433	3.25908	3.57205	5.14088	3.14553	3.84742	0.201701	0.638639	2.84043	4.80124	-1.20091	2.74976	4.42428	2.81318	5.8894	2.66615	3.8052	2.63397	4.92374	1.47881	-5.04766	3.61013	-1.20157	2.75741	-3.49468	5.55483	3.76766	0.431115	4.50474	-1.34323	4.76284	2.85432	3.13556	3.66122	6.72413	1.1517	1.34766
TCGA-ZG-A8QZ-01A	-0.693813	3.32689	2.9895	5.44462	3.85674	7.99322	3.62919	4.1332	1.76156	2.86712	5.10269	-2.92807	3.36977	3.11538	3.3576	4.57141	3.06455	3.42407	-0.286428	0.196862	2.31753	4.87107	-1.90776	2.2459	4.45516	2.40522	5.86198	0.696772	3.61295	2.25506	4.9063	0.186418	-5.79381	2.72693	-1.29555	1.65062	-4.76709	5.57505	3.36698	-0.592084	4.24926	-1.70977	4.74019	2.2174	2.89599	3.61207	6.654	-0.11068	0.631092
TCGA-ZG-A9KY-01A	-0.659708	4.65309	2.65019	5.3716	4.48657	8.17347	4.28363	4.35044	1.82379	3.55425	4.97957	-2.68248	3.17151	4.14987	4.41486	5.4266	3.43766	4.26552	-0.473014	1.09372	2.45418	5.40573	-1.4218	2.77153	4.50599	2.32718	5.83347	2.0541	4.26322	3.55748	4.98258	1.17144	-4.55143	2.672	-0.905021	2.7583	-3.70822	5.56904	3.0585	0.061381	4.49364	-1.74002	4.86625	3.02527	3.68609	3.60833	6.79753	1.26661	3.97698
TCGA-ZG-A9L0-01A	-0.837158	3.25575	2.98953	5.44983	4.03817	8.19081	3.65924	4.1776	1.76035	3.11769	5.4168	-2.9156	3.84146	2.68284	3.77261	4.60671	3.03634	3.26068	-0.0554254	0.584532	2.48274	4.85789	-1.77971	2.3563	4.44882	2.52045	5.91002	1.29169	3.53823	2.13627	4.90911	0.417032	-6.52936	3.01347	-1.27011	1.94143	-4.20113	5.60386	3.58728	-0.00259773	4.0653	-2.00829	4.75001	2.07638	3.47869	3.42999	6.66615	0.838056	0.0598589
TCGA-ZG-A9L1-01A	-0.47058	3.76767	2.62765	5.44059	3.63912	8.7855	3.30694	3.99725	1.77767	2.80367	4.98401	-2.79803	3.35764	3.68249	3.83919	4.92338	3.5229	3.00183	0.924674	-0.121544	2.06377	4.59363	-1.07306	2.5522	4.50451	2.15261	5.88724	1.88683	4.18859	3.60172	4.89867	0.265889	-4.47944	4.09819	-0.983802	1.99666	-3.26551	5.49399	3.47398	1.0194	4.60568	-1.16079	4.83527	4.07089	3.14015	3.97968	6.77613	1.84933	2.6139
TCGA-ZG-A9L2-01A	-0.65133	2.55826	2.97809	5.49698	3.3565	7.97899	3.80407	4.04758	1.72044	3.13759	5.47666	-2.95419	3.41453	2.4118	2.80941	4.60868	3.09935	3.29693	-0.298498	0.0708603	2.19906	4.35424	-1.76918	2.77158	4.41507	2.30514	5.94744	1.59976	3.29879	1.77266	4.89778	-0.26572	-6.1621	3.41861	-1.35689	1.02886	-4.19695	5.58203	3.42026	-0.831641	3.83895	-2.07343	4.70582	2.30889	2.79171	3.41739	6.55919	0.0348136	-1.16377
TCGA-ZG-A9L4-01A	-0.753902	2.85073	3.01346	5.52221	3.59759	8.56969	3.64258	4.19458	1.74202	2.92066	5.5445	-2.96944	3.69614	2.58194	3.21262	4.72111	3.06824	3.34222	-0.310267	-0.00508822	2.63301	4.52069	-1.65073	2.88264	4.36927	2.36737	5.94345	0.792879	3.62713	2.31166	4.88456	0.67705	-5.76834	3.17808	-1.37396	1.24255	-4.1856	5.5976	3.27995	-0.66141	4.08087	-1.98465	4.69865	2.18198	2.97619	3.68028	6.65458	0.219082	-0.340933
TCGA-ZG-A9L5-01A	-0.486459	4.3323	2.70072	5.44117	4.30903	8.98238	3.18014	4.04794	1.79372	3.01899	5.42144	-2.76493	3.25213	3.03405	4.07438	4.9027	3.39553	3.66715	0.641063	0.334371	1.92876	5.02614	-1.11983	2.79674	4.46255	2.30995	5.83326	1.5436	4.07229	3.4393	4.93739	0.871897	-4.82687	3.35667	-0.995013	2.21712	-3.73158	5.54578	3.37512	0.389359	4.54426	-1.27224	4.83561	3.01991	3.85125	3.78941	6.74958	1.04831	2.87934
TCGA-ZG-A9L6-01A	-0.561906	2.99861	2.98833	5.48024	3.71709	8.43597	3.7664	4.00142	1.72549	2.9577	5.26691	-2.94606	3.39268	2.43278	2.93144	4.71044	3.02102	3.15746	-0.0169021	0.16651	2.67885	4.50837	-1.70334	2.53701	4.43499	2.66567	5.91831	1.40143	3.53961	2.02608	4.94194	0.186855	-6.17473	3.16405	-1.37043	1.59346	-3.89614	5.52647	3.43892	-0.277921	4.05371	-1.89145	4.69757	2.24746	3.04111	3.47483	6.64579	0.479881	-0.437774
TCGA-ZG-A9L9-01A	-0.826704	2.72205	2.99825	5.49452	3.93585	8.14981	3.72705	4.06303	1.73645	3.18852	5.52802	-2.92547	3.63245	2.02056	3.30286	4.49399	3.12652	3.59251	-0.167327	0.196958	2.83065	4.55291	-1.86056	2.56714	4.46082	1.95568	5.95388	1.47003	3.36405	1.79782	4.89788	-0.239547	-6.7487	3.65377	-1.36816	1.1144	-4.30113	5.6248	3.91041	-0.506469	3.62831	-2.36875	4.72751	2.2187	2.92344	3.32921	6.6045	0.147772	-0.885875
TCGA-ZG-A9LB-01A	-0.556	2.68048	2.8973	5.4752	3.34958	8.76028	3.68718	3.99373	1.7793	3.64103	5.6146	-2.82569	3.78593	2.09614	2.95102	4.68716	2.97816	3.8454	-0.229591	0.672761	2.85983	5.17141	-1.26917	2.50963	4.38912	2.03405	5.94443	1.58332	3.49243	1.89369	4.70059	0.927024	-5.82287	3.02851	-1.39961	0.935665	-4.59018	5.66885	3.46844	-0.686088	4.20433	-1.60675	4.80886	1.38036	2.90999	3.59726	6.68904	-0.258353	-0.801159
TCGA-ZG-A9LM-01A	-0.755237	3.03537	2.98457	5.49118	3.88173	7.77714	3.04561	4.13674	1.77087	2.85499	5.49454	-2.88986	3.95533	3.26446	3.58382	4.78991	3.06319	2.68902	-0.0072886	0.559107	2.75413	4.93037	-1.35889	1.93021	4.47487	2.84242	5.92799	1.41685	3.73841	2.24687	4.88312	0.93469	-5.98152	2.98112	-1.29296	2.00516	-3.77536	5.52896	3.47854	0.629296	4.47104	-1.63431	4.74716	2.10017	3.0775	3.54836	6.68235	1.0397	0.304216
TCGA-ZG-A9LN-01A	-0.845332	2.77046	3.07332	5.47824	3.90271	7.54489	3.75929	4.33856	1.74856	3.18182	5.31276	-2.96611	3.61747	2.49346	3.20121	4.54854	2.96769	3.31708	-0.207956	0.511041	2.33797	4.72619	-1.9875	2.58338	4.41905	2.09742	5.93737	0.961474	3.29097	1.49581	4.79574	-0.984949	-6.5809	2.90435	-1.46324	1.35475	-4.77556	5.61024	3.2601	-0.617398	3.76474	-2.34779	4.73587	1.81187	2.64981	3.34783	6.60248	0.132921	-0.667082
TCGA-ZG-A9LS-01A	-0.65851	3.12782	3.12764	5.45841	3.98875	7.72097	3.96386	4.09485	1.72761	2.859	5.1966	-2.98925	3.37549	2.0265	3.30495	4.29409	2.95486	3.47211	-0.426708	0.30736	2.26791	4.51019	-1.85188	2.6622	4.4127	2.40524	5.89863	1.14507	3.34548	1.73008	5.00335	-0.713029	-6.36373	2.89163	-1.42328	1.32881	-4.56644	5.58854	3.64544	-0.58261	3.79737	-2.09129	4.70669	1.94805	2.68092	3.39344	6.59265	-0.0521543	-0.512964
TCGA-ZG-A9LU-01A	-0.914338	2.98084	3.07337	5.39042	4.2286	7.42061	3.94675	4.08315	1.77738	3.06604	5.12304	-2.85521	3.91487	2.41594	3.42449	4.73085	2.90715	3.95605	-0.0369623	0.646954	2.96148	5.13375	-2.23137	1.44346	4.46487	2.1066	5.85795	1.78635	3.62396	1.84093	5.01969	0.993225	-6.58153	2.20329	-1.46712	2.40424	-4.46324	5.61134	2.76031	-0.296191	3.75807	-1.91831	4.80521	1.83194	2.86481	3.31291	6.71187	0.37171	-0.361556
TCGA-ZG-A9LY-01A	-0.787445	3.3489	3.0527	5.45729	4.25758	8.15234	3.57603	4.2948	1.76474	3.0322	5.32228	-2.91732	3.56482	2.96367	3.35056	4.7456	3.03245	3.60891	-0.0705039	0.522576	2.26101	4.61673	-1.87611	2.28013	4.38139	2.62413	5.86918	1.05208	3.70906	2.39053	4.98614	0.493957	-5.38146	2.71739	-1.25358	2.08978	-3.9557	5.57922	3.5389	-0.0594771	4.10366	-1.63162	4.74347	2.26677	2.92025	3.6772	6.61732	0.251092	0.915916
TCGA-ZG-A9LZ-01A	-0.830351	3.93165	3.03055	5.47841	4.48913	8.02932	3.52586	4.37503	1.79775	3.0991	5.36239	-2.87941	3.59274	3.42084	4.21815	4.88454	3.13159	3.97421	0.0218229	0.147998	2.20319	5.0173	-1.60351	1.78775	4.49985	2.28813	5.87645	0.989663	3.89417	2.90464	4.95982	1.42473	-5.51634	2.83822	-1.13576	2.10026	-4.62592	5.63866	3.17631	-0.31112	4.36724	-1.42035	4.78033	2.2936	2.68698	3.68927	6.69926	0.0538627	2.24238
TCGA-ZG-A9M4-01A	-0.611648	4.58177	2.76523	5.31796	4.5169	6.90947	4.04798	4.29584	1.80409	3.43943	4.85504	-2.73381	3.60636	4.1316	4.56191	4.86348	3.21635	3.90919	0.653401	0.669443	2.73327	5.25226	-1.51663	1.60969	4.65483	2.29689	5.8529	2.16488	4.19772	3.22761	5.00599	0.936544	-5.40466	2.66936	-0.921275	2.48807	-4.18911	5.54039	3.84244	1.06395	4.47221	-1.51902	4.82243	2.5899	2.88374	3.74714	6.8083	1.22388	2.30222
TCGA-ZG-A9MC-01A	-0.952812	3.1177	3.09426	5.41371	3.94341	6.99777	3.82996	4.3966	1.73634	2.59061	4.9426	-2.99543	3.76972	2.39732	3.2035	4.21448	2.82284	3.49653	-1.21931	0.352943	2.04176	4.58465	-2.4728	1.84893	4.45796	2.21944	5.88108	-0.0499883	3.59722	1.73207	4.96171	-0.354074	-6.30679	1.95255	-1.45044	1.20316	-4.74816	5.57104	3.16178	-0.533106	3.65344	-2.28502	4.68833	1.44765	2.50352	3.31422	6.61044	-0.383125	-1.32256
TCGA-ZG-A9N3-01A	-1.254	3.4058	2.74513	5.41666	4.59581	7.72734	3.51429	4.396	1.83983	4.11685	5.09049	-2.68848	4.01457	3.45463	4.72171	5.00622	3.33488	3.86105	1.02366	0.999704	3.18359	5.50876	-2.3485	2.09241	4.62147	2.28566	5.90214	1.66542	3.71167	2.54683	5.10229	2.37204	-6.58238	3.83001	-0.995885	1.98133	-3.85863	5.69319	3.68829	1.53232	3.80012	-1.96868	4.86903	2.49123	3.06339	3.53344	6.61712	1.20975	1.04138
TCGA-ZG-A9ND-01A	-0.792565	3.78449	3.0931	5.513	4.49697	8.79761	3.3594	4.2158	1.80511	3.38742	5.62617	-2.80628	3.83271	3.67354	4.23994	5.33898	3.13662	3.80956	1.04017	0.408839	3.05464	4.63625	-1.54767	2.08727	4.34192	2.52611	5.91013	2.48963	3.90928	2.83842	4.97889	2.405	-5.18762	3.42902	-1.32941	3.36947	-2.98605	5.63147	3.11953	0.315044	4.23522	-1.40734	4.83273	3.21102	4.35175	3.78008	6.75885	1.44643	2.24487
TCGA-ZG-A9NI-01A	-0.705908	2.4959	2.99261	5.53942	3.72519	9.31506	3.74121	4.12545	1.74975	3.18183	5.69861	-2.86608	3.62895	2.01345	2.86821	4.85544	3.13164	3.23442	-0.0698343	0.252567	3.07877	4.62897	-1.52399	2.5848	4.37032	2.47484	5.97345	2.45779	3.52462	2.13034	4.94454	0.656114	-6.20974	4.1083	-1.37643	1.83183	-3.29936	5.58214	4.07253	-0.447662	3.89935	-1.66895	4.75223	2.63004	3.46953	3.48411	6.60541	0.655117	-0.622884
[truncated: 89 more columns]

## Sheet: sign_stat
pvalue	p.signif
4.90304e-06	****
0.12921
0.041047	*
7.2796e-08	****
0.457051
0.350418
0.000860803	***
0.372717
0.386365
0.044648	*
0.0669818
0.12821
0.0156676	*
5.49214e-06	****
0.017151	*
1.61365e-07	****
0.0154411	*
0.0670806
5.68294e-08	****
0.036611	*
0.000690327	***
3.13276e-05	****
0.0285668	*
1.20062e-07	****
1.81607e-07	****
1.63859e-08	****
0.0169973	*
0.00129434	**
0.167748
0.567643
2.19837e-05	****
0.0214102	*
0.181193
0.213605
0.713702
0.52969
7.08707e-07	****
1.87323e-05	****
0.0846157
0.0031742	**
0.265601
0.000854677	***
0.0100862	*
0.038001	*
0.344978
0.0371497	*
0.165313
0.000340798	***
0.949307
0.00121313	**
0.000130675	***
2.51707e-05	****
0.237945
0.0592813
0.000553039	***
0.0586595
0.000210578	***
0.0128431	*
0.00264156	**
0.000862854	***
0.871629
0.669267
0.509932
0.00161239	**
0.00847685	**
0.975169
0.220012
1.92972e-07	****
0.128376
2.06497e-11	****
1.50131e-05	****
0.413423
0.790575
4.75064e-05	****
0.582545
0.000409646	***
0.000883614	***
5.20575e-11	****
0.703354
0.00968813	**
0.191564
8.48524e-07	****
0.000117314	***
0.0217496	*
0.00276496	**
0.000338214	***
6.23441e-08	****
0.335256
1.20062e-07	****
0.0225992	*
0.393668
0.0863014
0.0776905
2.33784e-16	****
0.00208284	**
0.738548
0.656294
0.00397492	**
0.766703
0.83527
1.0636e-06	****
2.53838e-09	****
0.245939
0.450267
0.156611
0.0172438	*
0.0388689	*
0.379144
1.69766e-05	****
0.51676
0.0340164	*
2.83896e-06	****
0.0198512	*
0.515477
0.469161
0.569889
0.000185175	***
2.1269e-08	****
0.326692
0.0107617	*
0.0608144
0.00676984	**
1.07797e-06	****
0.0697928
0.202132
2.08703e-07	****
0.61754
0.00148213	**
2.46167e-06	****
0.000959976	***
0.57801
0.0105993	*
0.258837
0.0105389	*
0.883116
0.669749
0.238209
0.000367666	***

## Sheet: corr_IC50_ModelGene
A.443654	ABT.263	ABT.888	AKT.inhibitor.VIII	AS601245	Axitinib	AZ628	AZD.0530	AZD.2281	AZD6244	AZD7762	AZD8055	BAY.61.3606	Bexarotene	BI.2536	BIBW2992	Bicalutamide	BI.D1870	BIRB.0796	Bleomycin	BMS.708163	BMS.754807	Camptothecin	CCT007093	CEP.701	CGP.60474	CHIR.99021	CI.1040	CMK	Cytarabine	DMOG	Docetaxel	Doxorubicin	Embelin	Erlotinib	Etoposide	FH535	FTI.277	Gemcitabine	GNF.2	GW.441756	Imatinib	IPA.3	JNK.Inhibitor.VIII	KIN001.135	KU.55933	Lapatinib	LFM.A13	Methotrexate	MG.132
0.176384	0.0244101	0.356973	0.0652413	-0.336114	-0.155435	-0.222734	-0.631563	-0.208936	-0.319732	-0.207742	-0.164207	-0.115997	-0.508903	-0.195197	0.129861	-0.241463	0.195849	0.296919	-0.157753	-0.274368	-0.568199	0.108109	-0.638799	-0.0186582	-0.33294	-0.791905	-0.335504	-0.389732	-0.0489848	-0.746295	-0.420374	0.032402	-0.672925	-0.572006	-0.0613006	0.0306493	-0.344788	-0.0972561	-0.279274	0.393191	-0.697078	0.179903	-0.264766	-0.572246	-0.166413	-0.328481	-0.42841	0.0341424	-0.297693
0.130406	0.189363	0.172721	0.302298	-0.324077	-0.0614448	-0.504219	-0.646886	-0.431461	-0.50097	-0.386232	-0.264347	-0.0308073	-0.483258	-0.279514	0.203128	-0.0744152	-0.0327939	0.396856	-0.0565625	-0.216793	-0.658978	-0.0763709	-0.42804	-0.295847	-0.480727	-0.676923	-0.529192	-0.554953	-0.255881	-0.698703	-0.552001	0.124374	-0.527008	-0.595952	-0.011158	0.222063	-0.29031	-0.0814276	-0.399761	0.472904	-0.601197	0.220961	-0.175802	-0.480787	-0.412935	-0.31642	-0.59869	-0.090996	-0.392235
0.00793106	0.208572	-0.00626129	0.280802	-0.302059	-0.0540352	-0.494934	-0.592731	-0.421908	-0.533631	-0.381968	-0.364135	0.0647318	-0.27226	-0.359406	-0.0101292	0.0137175	-0.156835	0.288117	-0.0141909	-0.162363	-0.551023	-0.218897	-0.308492	-0.443735	-0.492117	-0.455749	-0.578054	-0.53264	-0.395129	-0.650365	-0.518728	0.0756977	-0.326123	-0.659212	-0.0516114	0.23942	-0.217742	-0.0838965	-0.447322	0.199869	-0.512439	0.337864	-0.121137	-0.37445	-0.396665	-0.4383	-0.585295	-0.202685	-0.471342
-0.205302	0.155131	-0.0868497	0.399351	-0.334049	0.112795	-0.629884	-0.457353	-0.568358	-0.39591	-0.565407	-0.151541	-0.109062	-0.208548	-0.471064	0.310817	0.133068	-0.322157	0.226779	-0.1755	-0.0226897	-0.636094	-0.332152	-0.157617	-0.429675	-0.657085	-0.482337	-0.624474	-0.599776	-0.396975	-0.519005	-0.685993	-0.0921119	-0.343409	-0.455992	-0.147722	0.249419	-0.457026	-0.2225	-0.286964	0.52774	-0.254547	0.133492	-0.395419	-0.319174	-0.500141	-0.111043	-0.413536	-0.323297	-0.271526
-0.111239	0.133098	-0.195657	0.510618	-0.375699	0.114422	-0.694256	-0.462223	-0.600139	-0.370035	-0.505313	-0.191122	-0.0180973	-0.144368	-0.401886	0.288148	0.259468	-0.396817	0.23756	-0.0820314	0.102883	-0.628066	-0.307669	-0.117729	-0.493525	-0.626582	-0.330705	-0.574268	-0.655366	-0.395118	-0.3905	-0.647946	-0.0370981	-0.130951	-0.387645	-0.065375	0.394935	-0.362619	-0.129693	-0.347689	0.49321	-0.226647	0.117219	-0.370945	-0.300881	-0.607045	-0.082467	-0.4459	-0.266629	-0.339846
0.100265	0.282186	0.279647	0.0802365	0.0109027	0.0913396	-0.159305	-0.390433	-0.0732722	-0.401587	0.0206825	-0.193952	0.216676	-0.324433	-0.0583844	-0.0623876	-0.183806	0.143	0.419106	0.168378	-0.230271	-0.220438	0.13503	-0.295073	-0.0281762	-0.252732	-0.392372	-0.254212	-0.268354	0.0653937	-0.44241	-0.207746	0.303176	-0.309499	-0.395376	0.180422	0.168076	-0.0289889	0.204352	-0.398203	0.0929223	-0.468498	0.331667	0.000773466	-0.475192	-0.141424	-0.404128	-0.478389	0.160373	-0.410263
-0.0897143	-0.132866	0.0471596	0.22547	-0.229245	0.0217069	-0.355675	-0.302859	-0.348103	0.0131894	-0.381563	-0.0252213	-0.211639	-0.177479	-0.16994	0.476724	0.0799049	-0.135426	0.170465	-0.203166	0.0310124	-0.471687	-0.0945374	-0.208317	-0.0827589	-0.353151	-0.363269	-0.232815	-0.342892	-0.103249	-0.264867	-0.446707	-0.114879	-0.22989	-0.0809716	-0.0490483	0.196603	-0.327979	-0.134173	-0.0438881	0.586161	-0.181585	-0.139143	-0.388361	-0.302381	-0.280786	0.180053	-0.122137	-0.117461	-0.0219331
-0.135898	-0.177644	0.0694808	0.0527411	-0.226237	-0.00804698	-0.240821	-0.203024	-0.342442	0.0692606	-0.385385	0.014163	-0.352764	-0.0974989	-0.177855	0.375268	0.0979632	-0.0706348	0.0809678	-0.327779	-0.067659	-0.445971	-0.152445	-0.180612	0.0145794	-0.280423	-0.382746	-0.236334	-0.268601	-0.115141	-0.271338	-0.402384	-0.224953	-0.304642	-0.0590093	-0.186012	0.0942649	-0.332121	-0.298824	0.0765119	0.633024	-0.0451025	-0.242202	-0.392648	-0.156322	-0.218265	0.233394	-0.0274557	-0.163215	0.124334
-0.042206	0.411465	0.18513	0.105399	0.177572	0.19222	-0.0874259	-0.176788	0.0645089	-0.374462	0.128981	-0.0908401	0.325566	-0.181322	-0.116868	-0.175125	-0.138624	0.0107857	0.312381	0.326301	-0.153284	0.0273453	0.0811911	0.0646522	-0.0301644	-0.165687	-0.110955	-0.138914	-0.237123	0.0369735	-0.172197	-0.0993319	0.351839	-0.091399	-0.320081	0.213184	0.0967812	0.11643	0.242315	-0.326089	-0.139594	-0.254273	0.37511	0.0805963	-0.29292	-0.159954	-0.404689	-0.331653	0.20077	-0.395694
-0.257964	-0.142608	-0.329764	0.215815	-0.12968	0.0983013	-0.27911	0.100433	-0.321685	0.146782	-0.340689	0.0758097	-0.201152	0.215862	-0.176092	0.304972	0.323304	-0.359637	-0.144329	-0.199928	0.24727	-0.16923	-0.306768	0.219773	-0.211812	-0.21945	0.125392	-0.138905	-0.142414	-0.231487	0.152827	-0.247441	-0.262754	0.170648	0.187244	-0.159881	0.162494	-0.215695	-0.21577	0.129699	0.302292	0.336603	-0.242228	-0.268727	0.183053	-0.230006	0.366901	0.137728	-0.302497	0.190952
[truncated: 29 more columns]

## Sheet: corr_pvalue
A.443654	ABT.263	ABT.888	AKT.inhibitor.VIII	AS601245	Axitinib	AZ628	AZD.0530	AZD.2281	AZD6244	AZD7762	AZD8055	BAY.61.3606	Bexarotene	BI.2536	BIBW2992	Bicalutamide	BI.D1870	BIRB.0796	Bleomycin	BMS.708163	BMS.754807	Camptothecin	CCT007093	CEP.701	CGP.60474	CHIR.99021	CI.1040	CMK	Cytarabine	DMOG	Docetaxel	Doxorubicin	Embelin	Erlotinib	Etoposide	FH535	FTI.277	Gemcitabine	GNF.2	GW.441756	Imatinib	IPA.3	JNK.Inhibitor.VIII	KIN001.135	KU.55933	Lapatinib	LFM.A13	Methotrexate	MG.132
0.038	0.0095	1.2e-07	0.028	0.00015	0.63	5.9e-05	2.3e-29	0.001	9.5e-10	0.00015	4.9e-05	0.37	2.4e-24	0.012	1.7e-05	2.3e-05	0.041	7.3e-10	0.85	8.3e-11	7.2e-14	0.11	1.7e-21	0.13	1e-09	1.2e-54	3.8e-10	5.9e-09	0.7	7.4e-44	6.7e-09	0.0076	1.8e-30	1.3e-18	0.13	0.031	1.8e-12	0.46	2.5e-07	1.2e-15	4.2e-29	4.9e-05	0.0047	1.7e-20	0.0016	2.3e-07	5.6e-16	0.19	1.2e-06
0.88	9.5e-05	0.007	7.8e-09	3e-05	0.071	5.4e-16	3.6e-47	9.2e-11	5.1e-18	1.8e-10	2.9e-10	0.079	7.9e-16	1.3e-07	4.9e-06	0.067	0.21	2.4e-12	0.47	8.1e-07	1.6e-22	0.32	6.3e-09	1.8e-07	1.6e-22	7.1e-30	8.7e-26	4.9e-23	0.00095	4.6e-50	5.2e-22	0.0061	2e-15	1.3e-33	0.22	1.5e-07	8.5e-12	0.73	2.7e-13	2.6e-20	3.8e-22	1.1e-07	0.00024	2.8e-18	2e-12	3.7e-09	6.6e-28	0.73	3.3e-12
0.3	1.7e-07	0.11	4.4e-12	0.001	0.0044	4.4e-20	2.2e-39	1.3e-11	1.1e-25	1.5e-09	1.2e-13	0.0023	1.2e-10	1.4e-10	0.02	0.29	0.016	8e-13	0.08	7.1e-05	9.6e-17	0.061	0.00014	2.7e-12	9e-28	5.2e-17	5.1e-34	6.1e-29	1.4e-05	3.1e-32	1.4e-23	0.00096	9.7e-09	2.2e-47	0.13	2e-10	7.7e-08	0.4	1.4e-18	6.1e-11	9.1e-18	9.5e-12	0.0049	1.5e-15	1.4e-16	2.8e-13	3.5e-34	0.51	9.2e-18
0.0095	0.021	0.25	5.4e-17	9.2e-10	0.15	9.8e-32	7.1e-18	1.8e-26	2.6e-10	2.6e-25	2.4e-07	0.84	0.00035	2.7e-19	1.6e-07	0.043	1.1e-07	0.00016	0.13	0.07	2.5e-33	1.4e-06	0.007	8.1e-16	7.3e-26	2.1e-11	3.1e-30	9.3e-30	4.7e-12	5.6e-20	3.9e-46	0.77	3.3e-06	2.5e-19	0.097	1.3e-11	4.5e-15	0.01	3e-07	8.1e-29	1.1e-05	0.0026	2.8e-12	6.4e-06	4.6e-23	0.0031	5.2e-13	8.1e-05	6.6e-07
0.0098	0.014	0.044	9.7e-25	2.5e-08	0.065	2.4e-42	3e-16	1e-30	1.4e-10	4.4e-24	1.1e-08	0.66	0.0046	4e-19	7.2e-07	0.004	1.4e-10	0.00012	0.42	0.39	3.5e-28	1.5e-07	0.074	4.4e-21	3.9e-27	7.3e-08	5.4e-31	2.4e-34	1e-13	3.6e-15	1.7e-47	0.94	0.0016	1.2e-17	0.23	6.1e-17	2.9e-10	0.043	2.8e-08	8.6e-22	6.2e-05	0.0009	1.1e-11	2e-05	2.9e-31	0.0037	2.4e-13	5.3e-05	5.6e-08
0.61	3.5e-12	4e-10	0.013	0.55	1.1e-05	0.00021	4.3e-27	0.16	3.5e-22	0.43	9.8e-08	5.9e-09	3.5e-23	0.05	0.59	1.9e-08	0.028	6.2e-26	6.3e-07	6e-08	0.00068	0.0021	2.3e-06	0.042	3.1e-12	3.4e-18	1.4e-10	4e-10	0.4	1.7e-18	9.4e-06	3.4e-13	6.9e-11	1.3e-21	3.5e-08	0.0018	0.004	7.9e-07	2.7e-21	0.00068	1.9e-37	8.8e-19	0.38	7.6e-34	0.00022	4e-24	1e-29	1.5e-05	9.9e-20
0.61	0.36	0.42	1.2e-07	3.9e-12	0.32	4.3e-12	5.1e-09	4e-16	0.014	2.7e-19	0.0026	0.0059	0.0037	1.7e-07	1.3e-17	0.037	0.00038	0.085	0.00035	0.094	9.2e-27	0.00022	2.7e-05	1.5e-05	2.9e-09	8.6e-10	6.4e-10	1.2e-10	2.2e-06	3.3e-12	4.5e-18	0.036	2e-06	2e-06	0.0067	7.2e-06	5.4e-14	0.00019	0.058	3.9e-39	0.0017	0.9	1.3e-17	0.0016	3.7e-09	0.85	0.00014	6.8e-05	0.099
0.62	0.014	0.25	0.00051	6.5e-15	0.016	1.9e-07	6.1e-05	1.7e-13	0.45	1.7e-18	0.084	1.2e-06	0.077	3.1e-06	6.7e-16	0.011	0.0016	0.95	9.7e-09	0.054	6.5e-23	2.6e-05	3e-05	0.0023	5.4e-05	9.5e-08	4.2e-06	5.2e-06	2.8e-06	4.1e-09	1.5e-12	5.2e-05	1.6e-06	0.0012	3.7e-06	0.0046	2.3e-14	1.1e-08	0.96	4.9e-35	0.12	0.043	1.1e-19	0.17	1.9e-05	0.079	0.056	5.7e-07	0.77
0.033	7.6e-26	3.2e-06	0.015	0.00016	3.1e-14	0.0029	8.7e-11	0.83	1.8e-22	0.16	2e-05	1e-20	1.5e-09	0.025	0.0034	1.8e-06	0.3	7.6e-23	7.5e-17	0.0087	0.96	0.0031	0.95	0.021	1.1e-09	0.00014	4.9e-07	6.2e-08	0.29	3.4e-05	0.0054	1.2e-20	0.016	3e-13	8.8e-13	0.0033	0.94	3.1e-12	1.3e-24	0.85	2.4e-13	1.7e-29	0.00076	3.4e-16	0.00024	2.5e-33	7.2e-19	6.4e-08	1.1e-25
0.0018	0.00037	7.9e-14	8.7e-06	6.9e-07	0.06	1.2e-05	0.18	1.2e-10	0.042	2.9e-11	0.88	2.3e-06	2.7e-06	2.9e-06	5.9e-05	1.3e-16	2.1e-15	9.2e-05	9.6e-08	0.00017	3.6e-05	1.6e-15	0.012	6.8e-06	0.13	0.048	0.055	0.027	1.7e-11	0.48	3.8e-05	4.6e-10	0.015	0.37	1e-09	0.0011	0.011	5.3e-11	0.017	3.8e-05	2.4e-06	7e-05	2.1e-12	4.7e-05	5.6e-05	6.1e-07	0.046	4.4e-16	0.016
[truncated: 29 more columns]
