# Supplementary material for: Single-cell RNA combined with bulk RNA analysis to explore oxidative stress and energy metabolism factors and found a new prostate cancer oncogene MXRA8
Source: Aging (Albany NY). 2024 Mar 4;16(5):4469–502. doi: 10.18632/aging.205599 (PMC10968713; doi:10.18632/aging.205599)
Supplement: Supplementary Table 10 [file aging-16-205599-s011.xlsx]

## Sheet: IMvigor210_res
Supplementary Table 10. Analysis results of immune therapy response between high and low risk groups.
sample	riskscore	riskgroup	status	time	Response	response
SAM0257bbbbd388	0.788397	Low	1	469.158	PD/SD	SD
SAM025b45c27e05	1.7606	High	1	263.162	PD/SD	PD
SAM032c642382a7	0.892176	Low	1	74.9076	PD/SD	PD
SAM0571f17f4045	1.2129	Low	1	136.016	PD/SD	SD
SAM065890737112	0.502444	Low	0	602.218	CR/PR	CR
SAM0684af734db1	1.83362	High	0	697.823	CR/PR	PR
SAM075e037d95bc	1.58311	High	0	639.671	CR/PR	PR
SAM07a93a28f801	1.06464	Low	0	385.38	CR/PR	PR
SAM08cce2fa88f2	1.09475	Low	0	663.326	PD/SD	SD
SAM09c84ec0cf34	2.77205	High	1	195.154	PD/SD	PD
SAM0a0f2bac4b20	1.55899	High	1	35.4825	PD/SD	PD
SAM0a7c2091dd56	1.84018	High	1	78.8501	PD/SD	PD
SAM0bdb3428bd13	2.21668	High	1	67.0226	PD/SD	PD
SAM0ce9c983b20f	1.46601	High	1	198.111	PD/SD	PD
SAM0d855cff64e6	1.07192	Low	1	85.7495	PD/SD	PD
SAM0f956e757453	1.4773	High	1	312.444	PD/SD	PD
SAM110501d0eedb	0.727102	Low	1	128.131	PD/SD	PD
SAM12502d970c10	1.51884	High	1	221.766	PD/SD	SD
SAM14938611a2d3	0.759993	Low	0	642.628	CR/PR	PR
SAM14df63a65411	1.80572	High	0	642.628	CR/PR	PR
SAM166a419a4e5a	1.1934	Low	1	161.643	PD/SD	PD
SAM18039827e1b9	1.59591	High	1	44.3532	PD/SD	PD
SAM181b638b8248	1.56146	High	1	326.242	PD/SD	PD
SAM187e056d6a2a	1.69161	High	1	68.9938	PD/SD	PD
SAM18a4dabbc557	2.36279	High	1	493.799	PD/SD	PD
SAM18b9351e265a	1.06564	Low	1	476.057	PD/SD	PD
SAM18bc1078bc15	1.00235	Low	1	206.982	PD/SD	PD
SAM18be5b395318	1.17059	Low	1	270.062	PD/SD	PD
SAM19fec8f3b3bd	2.00406	High	1	296.674	PD/SD	PD
SAM1a87df750b9d	1.33359	Low	1	161.643	PD/SD	SD
SAM1ab1b28d9f2b	0.780201	Low	1	63.0801	PD/SD	PD
SAM1abf01dd4544	0.655573	Low	0	505.626	CR/PR	PR
SAM1ac4e3dee297	1.91205	High	1	165.585	PD/SD	PD
SAM1c0ecfb3eb63	1.49213	High	1	175.441	PD/SD	PD
SAM1c8b086175ca	1.80968	High	1	622.916	PD/SD	PD
SAM1dda30f1c5be	1.62816	High	0	637.7	PD/SD	PD
SAM1e9c4d1d39ae	0.781164	Low	1	372.567	PD/SD	PD
SAM1f66db567eb5	1.9254	High	0	497.741	CR/PR	PR
SAM1f83ebd6be9b	1.15472	Low	1	105.462	PD/SD	PD
SAM1fa6bcb7fc48	1.16096	Low	0	682.053	PD/SD	PD
SAM203dcf14f927	0.947793	Low	0	580.534	CR/PR	CR
SAM2070b416069c	1.11544	Low	1	240.493	PD/SD	SD
SAM23095936e611	1.50858	High	1	67.0226	PD/SD	PD
SAM23aa15d4a0b0	1.65233	High	1	171.499	PD/SD	PD
SAM25510f300d79	1.68791	High	0	620.945	CR/PR	CR
SAM2570ff4aae6e	1.58215	High	0	671.211	CR/PR	PR
SAM26104d5adc89	1.70394	High	1	161.643	PD/SD	SD
SAM2624229effe8	1.28074	Low	1	76.8789	PD/SD	PD
SAM27299aed7681	1.42205	High	0	565.749	CR/PR	PR
SAM28687037e4ff	1.63485	High	0	647.556	PD/SD	SD
SAM28e6031ac18b	1.71077	High	1	276.961	PD/SD	SD
SAM297c0301e861	1.57208	High	1	242.464	PD/SD	PD
SAM29da928587ad	1.59834	High	1	77.8645	PD/SD	PD
SAM2b672f4336c7	1.67316	High	1	459.302	PD/SD	SD
SAM2bba8cb35e48	1.19416	Low	1	314.415	PD/SD	PD
SAM2c9586161ce6	1.29794	Low	1	338.07	PD/SD	PD
SAM2dc3f04e45e9	1.14013	Low	1	305.544	PD/SD	PD
SAM2e7aa8fa0ab3	0.695503	Low	1	231.622	PD/SD	PD
SAM2e9ac0b1b250	1.34859	Low	0	664.312	CR/PR	CR
SAM2eb07dedf07f	1.24153	Low	0	615.031	CR/PR	PR
SAM2f228939632f	1.7004	High	1	236.55	PD/SD	PD
SAM30b5c6c54cf7	1.11227	Low	1	277.947	CR/PR	CR
SAM30cf07d4874f	0.846762	Low	1	349.897	PD/SD	SD
SAM31d9176e11fb	1.93754	High	0	513.511	CR/PR	CR
SAM31f41dd0d6ca	1.92587	High	1	248.378	PD/SD	SD
SAM3330c03fdf00	1.1715	Low	0	575.606	PD/SD	PD
SAM34430ef08e5b	0.764727	Low	0	545.051	PD/SD	PD
SAM36851bc8b9ae	1.55083	High	1	106.448	PD/SD	SD
SAM36a9225b0222	1.04941	Low	0	714.579	PD/SD	SD
SAM36d87392593b	1.56642	High	0	710.637	PD/SD	SD
SAM3894ac3956a5	1.33691	Low	0	63.0801	PD/SD	PD
SAM39eb94fa504d	1.78055	High	1	537.166	PD/SD	PD
SAM3a1c9632ff7b	2.1979	High	0	480.986	PD/SD	SD
SAM3b1066e5801b	0.488251	Low	0	469.158	PD/SD	SD
SAM3b15b4c6311d	1.57707	High	0	643.614	CR/PR	CR
SAM3cb94b0d5297	1.40645	High	1	151.786	PD/SD	PD
SAM3e04eb914f3d	1.80514	High	0	518.439	CR/PR	PR
SAM3e8baff50d7a	0.616314	Low	1	208.953	PD/SD	SD
SAM3ee5dcd894f0	1.33398	Low	1	261.191	PD/SD	PD
SAM415f36ad349e	1.55453	High	1	539.138	PD/SD	PD
SAM4305ab968b90	1.42218	High	1	42.3819	PD/SD	PD
SAM4501e41e4751	1.45291	High	1	33.5113	PD/SD	PD
SAM45c8e6412c66	1.24047	Low	1	104.476	PD/SD	PD
SAM468a9e1dc821	1.56889	High	1	116.304	PD/SD	PD
SAM47fc46c3d6be	1.62043	High	0	561.807	PD/SD	SD
SAM49d48750e294	1.88494	High	1	295.688	PD/SD	PD
SAM49f9b2e57aa5	1.33552	Low	1	223.737	PD/SD	PD
SAM4b0175e8db6e	1.21994	Low	1	62.0945	PD/SD	PD
SAM4b7ea015fd9e	1.37705	High	1	398.193	PD/SD	PD
SAM4caabd64e7fd	1.14733	Low	0	471.129	CR/PR	PR
SAM5234688806a7	1.32228	Low	1	176.427	PD/SD	PD
SAM52500cabdd36	0.305776	Low	0	614.045	PD/SD	SD
SAM52e3fa3ad574	1.30701	Low	1	238.522	PD/SD	PD
SAM548551ef782c	0.881518	Low	0	518.439	CR/PR	PR
SAM54e58f1b0230	2.03547	High	1	131.088	PD/SD	PD
SAM553c3c35b847	1.61642	High	1	201.068	PD/SD	PD
SAM557dde1b9f3e	0.997816	Low	1	201.068	PD/SD	PD
SAM560f23d6a3ad	1.50949	High	0	641.643	CR/PR	CR
SAM563d6233dfa2	2.00404	High	1	64.0657	PD/SD	PD
SAM568ce160abd9	0.404838	Low	1	385.38	PD/SD	SD
SAM572f19794c96	1.52102	High	0	504.641	CR/PR	CR
SAM5767dd75d142	0.983755	Low	0	545.051	CR/PR	PR
SAM58e7832f4e7d	1.59371	High	0	493.799	CR/PR	PR
SAM59f392864f5d	0.590992	Low	1	533.224	PD/SD	SD
SAM59fda9035d1d	2.20555	High	1	112.361	PD/SD	PD
SAM5a2347c0498a	0.383117	Low	1	146.858	PD/SD	SD
SAM5b57e47fdcb3	0.881234	Low	1	115.318	PD/SD	PD
SAM5c139c5c1c4f	0.876851	Low	1	216.838	PD/SD	PD
SAM5cc2d9036053	1.30696	Low	1	170.513	PD/SD	PD
SAM5cfa1699bdb7	2.06471	High	0	475.072	PD/SD	PD
SAM5d1dfd5207f5	1.56067	High	1	327.228	PD/SD	PD
SAM5d989c86255e	1.43269	High	1	103.491	PD/SD	PD
SAM5e3bae090b8c	1.62004	High	1	202.053	PD/SD	PD
SAM5fe7a81a39dd	0.361327	Low	1	512.526	PD/SD	PD
SAM6083aac8db99	1.16714	Low	0	618.973	CR/PR	PR
SAM6157c8f38b72	1.23084	Low	0	497.741	CR/PR	PR
SAM61b9d4d84c64	0.657678	Low	0	641.643	PD/SD	SD
SAM61baf919bb01	2.07201	High	1	468.172	PD/SD	SD
SAM62fb1388c871	0.338949	Low	0	675.154	PD/SD	PD
SAM63405b04ab2d	1.66225	High	1	204.025	PD/SD	PD
SAM63b2189c36d7	0.948243	Low	1	119.261	PD/SD	PD
SAM65afda25b920	1.14917	Low	1	242.464	PD/SD	SD
SAM6662f5181f87	1.42847	High	0	578.563	PD/SD	PD
SAM670649e105b5	1.4566	High	0	662.341	CR/PR	CR
SAM675a12a09c15	1.0348	Low	1	86.7351	PD/SD	PD
SAM6780ed436b55	0.996731	Low	1	187.269	PD/SD	PD
SAM6792d6e98068	1.94552	High	1	180.37	PD/SD	PD
SAM681e4bf7cf85	1.34916	Low	0	701.766	CR/PR	PR
SAM6964a6d7b967	0.832998	Low	1	487.885	PD/SD	PD
SAM6cb230f208a8	1.28989	Low	0	696.838	CR/PR	PR
SAM6cbc10abddb0	1.31439	Low	1	178.398	PD/SD	PD
SAM6d2ae0c39b96	1.23616	Low	0	663.326	PD/SD	PD
SAM6dd7ad1d797d	1.98646	High	1	578.563	PD/SD	PD
SAM6f2a102a99df	1.83729	High	0	578.563	CR/PR	CR
SAM6ff654a20f98	1.32273	Low	0	556.879	CR/PR	CR
SAM7114d99032ec	0.908418	Low	1	325.257	PD/SD	PD
SAM716f54e468f4	1.17248	Low	0	635.729	PD/SD	SD
SAM727c0e92a2a7	1.52484	High	0	561.807	CR/PR	PR
SAM73663ee4a96e	1.3243	Low	0	637.7	CR/PR	CR
SAM75142fcab9df	1.32757	Low	1	357.782	PD/SD	PD
SAM7538ad9ff524	1.25552	Low	0	573.634	PD/SD	SD
SAM753d4bb52dbe	0.661834	Low	1	341.027	PD/SD	SD
SAM75f12d1a55fc	1.27775	Low	0	442.546	PD/SD	SD
SAM76a431ba6ce1	1.64966	High	1	423.819	PD/SD	PD
SAM771445e92421	1.32999	Low	0	582.505	CR/PR	CR
SAM7829a341b9f3	1.10467	Low	1	116.304	PD/SD	PD
SAM7893196e0e89	1.13025	Low	1	79.8357	PD/SD	PD
SAM7aa01fc49a80	0.986085	Low	1	64.0657	PD/SD	PD
SAM7b40007f4aa4	1.15357	Low	0	649.528	CR/PR	PR
SAM7bff231634e9	1.40671	High	1	307.515	PD/SD	SD
SAM7c67b05aa109	2.02312	High	1	247.392	PD/SD	SD
SAM7d2dfba6cd84	1.54453	High	1	381.437	PD/SD	SD
SAM7d7c54623618	0.697779	Low	0	636.715	CR/PR	PR
SAM7f0d9cc7f001	0.716144	Low	1	138.973	PD/SD	PD
SAM7fb6987514a4	1.12233	Low	0	685.01	PD/SD	PD
SAM7fb7a13c096b	1.34225	Low	1	50.2669	PD/SD	PD
SAM80c6183220e6	1.73329	High	0	442.546	PD/SD	PD
SAM81b71522417a	1.47112	High	1	64.0657	PD/SD	PD
SAM822b226466a1	0.945452	Low	0	518.439	PD/SD	SD
SAM8533e5e261d6	1.36155	High	1	384.394	CR/PR	PR
SAM85f0a3ac1c45	1.6344	High	1	175.441	PD/SD	PD
SAM87a8e18eb45b	1.57063	High	1	82.7926	PD/SD	PD
SAM8884fe446d20	1.57586	High	0	694.867	CR/PR	PR
SAM8a1b0e02ee42	0.988504	Low	0	617.002	CR/PR	CR
SAM8b4b8b0f9e73	1.5278	High	0	470.144	PD/SD	SD
SAM8e469834acc1	1.36729	High	1	111.376	PD/SD	PD
SAM8e8ef2368dfa	1.50628	High	1	135.031	PD/SD	PD
SAM8f2275c36e8c	1.73138	High	0	621.93	PD/SD	SD
SAM91c47b054ffb	0.572423	Low	1	510.554	CR/PR	PR
SAM9306c5c92444	0.387442	Low	0	463.244	PD/SD	PD
SAM9410b866974a	2.47969	High	1	202.053	PD/SD	SD
SAM943df5cf15df	2.16398	High	1	64.0657	PD/SD	PD
SAM94859b440b1d	1.47368	High	1	400.164	PD/SD	PD
SAM9539a4f19ebc	1.73052	High	1	238.522	PD/SD	SD
SAM957378bd907f	1.17762	Low	1	67.0226	PD/SD	PD
SAM961d04c42bd9	0.980038	Low	1	176.427	PD/SD	PD
SAM9725303dce0c	0.381757	Low	0	267.105	PD/SD	PD
SAM978a587b207e	1.66267	High	1	63.0801	PD/SD	PD
SAM97a00e0929fb	0.301343	Low	0	381.437	CR/PR	PR
SAM99a46b9eec27	1.68082	High	1	108.419	PD/SD	PD
SAM9a2cf3c06fb3	1.04066	Low	1	169.528	PD/SD	PD
SAM9aa6a095a9d6	1.5025	High	1	265.133	PD/SD	PD
SAM9cafb905b36a	1.96933	High	1	228.665	PD/SD	PD
SAM9d2494119c05	0.948529	Low	1	43.3676	PD/SD	PD
SAM9daccafc18db	2.11953	High	0	493.799	PD/SD	PD
SAM9e11ec6bea80	2.08866	High	1	462.259	PD/SD	SD
SAM9fb814c22bdb	1.50888	High	1	573.634	PD/SD	SD
SAMa1871f491b02	1.13992	Low	1	52.2382	PD/SD	PD
SAMa1e62d323e1d	1.06412	Low	1	317.372	PD/SD	SD
SAMa321770ac31c	2.00812	High	0	211.91	PD/SD	PD
SAMa424c75831b4	0.988418	Low	1	106.448	PD/SD	PD
SAMa535fcdf18a0	1.36025	High	0	518.439	CR/PR	PR
SAMa90d73f8d891	1.10733	Low	1	30.5544	PD/SD	PD
SAMa913c6139ec8	0.8368	Low	1	153.758	PD/SD	SD
SAMa9ca8536d2b1	0.870683	Low	0	655.441	PD/SD	SD
SAMaabf4afe4213	1.20801	Low	1	78.8501	PD/SD	PD
SAMaaf505c36f93	1.35212	High	0	617.002	CR/PR	PR
SAMab8052a03398	1.87868	High	1	399.179	PD/SD	SD
SAMabc151b01ea3	0.980443	Low	1	16.7556	PD/SD	PD
SAMad83c9c53537	1.74664	High	0	449.446	PD/SD	PD
SAMae02629a97f7	0.961656	Low	1	97.577	PD/SD	PD
SAMae1690469964	1.33524	Low	1	634.743	PD/SD	SD
SAMae4da274eded	1.18976	Low	1	149.815	PD/SD	PD
SAMaec7380f9ab0	0.347628	Low	0	625.873	CR/PR	PR
SAMaf42c1541269	1.08295	Low	0	165.585	PD/SD	SD
SAMb0a83e5fbde9	1.50714	High	0	699.795	PD/SD	SD
SAMb0d11db9aa79	1.64105	High	1	316.386	PD/SD	PD
SAMb15ac6e4c4ef	1.35106	High	0	600.246	CR/PR	PR
SAMb15ad09d6e24	1.5148	High	1	116.304	PD/SD	PD
SAMb2e4a082541a	1.46605	High	1	131.088	PD/SD	PD
SAMb2f1d0e54ece	1.60295	High	1	342.012	CR/PR	PR
SAMb3c02294aba7	1.2881	Low	0	672.197	CR/PR	PR
SAMb419a8fcbfcd	0.826962	Low	0	682.053	CR/PR	PR
SAMb470eb8f04be	1.12551	Low	0	602.218	CR/PR	CR
SAMb4c7a001537d	1.23094	Low	1	95.6057	PD/SD	PD
SAMb8070b7937e7	1.03037	Low	1	630.801	PD/SD	SD
SAMb8101c538753	1.74616	High	1	402.136	PD/SD	SD
SAMb963dda93cfd	1.50263	High	1	82.7926	PD/SD	PD
SAMba1a34b5a060	1.75289	High	1	385.38	PD/SD	PD
SAMba7176afe070	1.0175	Low	0	103.491	PD/SD	PD
SAMbc8dc3a7b54e	0.309012	Low	1	442.546	PD/SD	PD
SAMbcb07ba81cee	0.968006	Low	1	75.8932	PD/SD	PD
SAMbcbc7957c264	1.69623	High	1	125.175	PD/SD	PD
SAMbda79f955628	1.03649	Low	0	618.973	PD/SD	SD
SAMbe83eae4026e	1.55981	High	1	81.807	PD/SD	PD
SAMbf1a3ae828e6	0.950642	Low	0	621.93	CR/PR	CR
SAMbfdffb97c446	1.36006	High	1	201.068	PD/SD	SD
SAMc0d625a50eb8	1.29328	Low	1	398.193	PD/SD	SD
SAMc0da5d48686d	1.76979	High	1	284.846	PD/SD	PD
SAMc0ef41aa6c8b	1.84413	High	1	286.817	PD/SD	PD
SAMc1251c7bfee2	0.803449	Low	0	648.542	CR/PR	PR
SAMc1b27bc16435	0.832117	Low	0	725.421	CR/PR	PR
SAMc2a1820d4e6b	0.997672	Low	0	621.93	CR/PR	CR
SAMc57eadb2d82b	1.42389	High	1	240.493	PD/SD	PD
SAMc692536a795a	1.33969	Low	1	169.528	PD/SD	PD
SAMc6eff056c89a	1.69023	High	1	54.2094	PD/SD	PD
SAMc919aebc7fdd	0.840988	Low	0	621.93	CR/PR	PR
SAMcabb6d58ff55	2.74777	High	0	608.131	PD/SD	SD
SAMcb132b0cdd2c	0.936885	Low	1	75.8932	PD/SD	PD
SAMcc4675f394a1	1.55116	High	1	93.6345	PD/SD	PD
SAMcc7a42d87e9c	0.783553	Low	0	516.468	CR/PR	PR
SAMce39dd79b441	1.29367	Low	1	188.255	PD/SD	PD
SAMcf018fee2acd	1.14521	Low	1	486.899	PD/SD	PD
SAMd027124354ce	1.61667	High	0	705.708	CR/PR	CR
SAMd135d5867fe3	1.4952	High	1	108.419	PD/SD	PD
SAMd1bd63734394	0.988047	Low	1	58.152	PD/SD	PD
SAMd215b503f99a	2.14764	High	0	51.2526	PD/SD	SD
SAMd2492b2a31bb	2.09673	High	1	235.565	PD/SD	PD
SAMd35318127278	0.666717	Low	0	647.556	CR/PR	CR
SAMd3601288319e	0.690021	Low	0	693.881	CR/PR	CR
SAMd3bd67996035	1.24155	Low	0	624.887	CR/PR	CR
SAMd43f8933066b	0.96262	Low	0	600.246	CR/PR	PR
SAMd4c0837b0997	1.37424	High	1	161.643	PD/SD	PD
SAMd636e3461955	1.61278	High	1	314.415	PD/SD	PD
SAMd697ba701077	0.798992	Low	1	634.743	PD/SD	SD
SAMd7d57ee3a863	1.80283	High	0	608.131	CR/PR	CR
SAMd86389d0d768	1.04921	Low	1	66.037	PD/SD	PD
SAMd98bac0a070f	1.0648	Low	1	62.0945	PD/SD	PD
SAMda4d892fddc8	1.43714	High	0	423.819	PD/SD	PD
SAMdab9ca8fb5de	1.44271	High	0	5.91376	PD/SD	PD
SAMdad5c29dc105	1.34212	Low	1	72.9363	PD/SD	PD
SAMdb3f50c9129c	0.440376	Low	1	474.086	PD/SD	PD
SAMdcae54fcd7fa	0.937555	Low	1	187.269	PD/SD	SD
SAMdee1011782cd	1.4501	High	1	117.29	PD/SD	PD
SAMdf3e42c8672a	1.45455	High	1	219.795	PD/SD	PD
SAMe07c4560772d	2.02068	High	0	63.0801	PD/SD	PD
SAMe0c49ea0df5d	2.21872	High	1	124.189	PD/SD	SD
SAMe1eb5d988760	1.10035	Low	0	631.786	CR/PR	CR
SAMe3210d3632b4	1.70497	High	1	65.0513	PD/SD	PD
SAMe3d4266775a9	1.37448	High	0	419.877	PD/SD	PD
SAMe41b1e773582	1.78736	High	1	25.6263	PD/SD	PD
SAMe50d15fde368	1.34438	Low	0	566.735	CR/PR	PR
SAMe56c96c51190	1.51652	High	1	292.731	PD/SD	PD
SAMe5bc41772bc9	2.23227	High	1	183.326	PD/SD	PD
SAMe712352fb82a	0.863803	Low	0	663.326	CR/PR	PR
SAMe7bcab05402e	1.31195	Low	1	237.536	PD/SD	SD
SAMe7bf6c015192	1.59569	High	1	93.6345	PD/SD	PD
SAMe7e4f7c076a7	2.01347	High	1	59.1376	PD/SD	PD
SAMe9475f77504b	0.961335	Low	0	559.836	PD/SD	SD
SAMe94c30c30616	1.54549	High	1	461.273	PD/SD	SD
SAMe97af0feefdf	1.57129	High	1	333.142	PD/SD	PD
SAMe9ae8beb82fa	1.68346	High	1	164.6	PD/SD	PD
SAMeaa477a5384b	0.911015	Low	0	647.556	CR/PR	CR
SAMeb29625f76a5	1.61068	High	1	93.6345	PD/SD	PD
SAMeb587a68006b	1.59507	High	0	620.945	PD/SD	SD
SAMee3844cc0b9f	1.78952	High	1	96.5914	PD/SD	PD
SAMef0e3d2415fd	1.57342	High	1	303.573	PD/SD	SD
SAMeff2ce356ccb	1.7518	High	1	242.464	PD/SD	PD
SAMf20b827dca51	1.01325	Low	1	131.088	PD/SD	PD
SAMf275eb859a39	1.06745	Low	0	734.292	CR/PR	PR
SAMf28c01545593	1.52948	High	1	192.197	PD/SD	SD
SAMf2aae1443f67	1.95439	High	1	310.472	PD/SD	PD
SAMf3a9bce50099	1.43066	High	0	63.0801	PD/SD	PD
SAMf82bbdc267c8	1.35078	Low	1	93.6345	PD/SD	PD
SAMfb7aec7cb0e2	1.27356	Low	0	676.14	CR/PR	PR
SAMfd947610629d	1.78378	High	1	271.047	PD/SD	PD
SAMfed609955db9	1.2764	Low	0	617.002	PD/SD	PD
SAMffa5c7cad0e5	1.56444	High	1	466.201	CR/PR	PR

## Sheet: TIDE_res
sample	Riskgroup	Cluster
TCGA-2A-A8VL-01A	Low	C1
TCGA-2A-A8VO-01A	Low	C2
TCGA-2A-A8VT-01A	High	C2
TCGA-2A-A8VV-01A	Low	C1
TCGA-2A-A8VX-01A	Low	C2
TCGA-2A-A8W1-01A	Low	C2
TCGA-2A-A8W3-01A	High	C2
TCGA-2A-AAYF-01A	Low	C2
TCGA-2A-AAYO-01A	Low	C1
TCGA-2A-AAYU-01A	Low	C2
TCGA-4L-AA1F-01A	High	C1
TCGA-CH-5737-01A	High	C2
TCGA-CH-5738-01A	High	C1
TCGA-CH-5739-01A	High	C1
TCGA-CH-5740-01A	Low	C2
TCGA-CH-5741-01A	High	C2
TCGA-CH-5743-01A	Low	C1
TCGA-CH-5744-01A	High	C2
TCGA-CH-5745-01A	High	C1
TCGA-CH-5746-01A	Low	C1
TCGA-CH-5748-01A	Low	C2
TCGA-CH-5750-01A	Low	C2
TCGA-CH-5751-01A	High	C2
TCGA-CH-5752-01A	High	C2
TCGA-CH-5753-01A	High	C2
TCGA-CH-5754-01A	High	C2
TCGA-CH-5761-01A	High	C2
TCGA-CH-5762-01A	Low	C1
TCGA-CH-5763-01A	Low	C1
TCGA-CH-5764-01A	Low	C1
TCGA-CH-5765-01A	Low	C2
TCGA-CH-5766-01A	Low	C1
TCGA-CH-5767-01A	Low	C2
TCGA-CH-5768-01A	Low	C2
TCGA-CH-5769-01A	High	C1
TCGA-CH-5771-01A	High	C1
TCGA-CH-5772-01A	Low	C2
TCGA-CH-5788-01A	High	C2
TCGA-CH-5789-01A	Low	C1
TCGA-CH-5790-01A	High	C2
TCGA-CH-5791-01A	High	C2
TCGA-CH-5792-01A	High	C1
TCGA-CH-5794-01A	Low	C2
TCGA-EJ-5494-01A	Low	C1
TCGA-EJ-5495-01A	High	C1
TCGA-EJ-5496-01A	Low	C2
TCGA-EJ-5497-01A	Low	C1
TCGA-EJ-5498-01A	Low	C1
TCGA-EJ-5499-01A	Low	C1
TCGA-EJ-5501-01A	Low	C1
TCGA-EJ-5502-01A	Low	C1
TCGA-EJ-5503-01A	Low	C1
TCGA-EJ-5504-01A	Low	C1
TCGA-EJ-5505-01A	Low	C1
TCGA-EJ-5506-01A	Low	C1
TCGA-EJ-5507-01A	Low	C2
TCGA-EJ-5508-01A	Low	C1
TCGA-EJ-5509-01A	Low	C1
TCGA-EJ-5510-01A	Low	C1
TCGA-EJ-5511-01A	Low	C2
TCGA-EJ-5512-01A	Low	C1
TCGA-EJ-5514-01A	High	C1
TCGA-EJ-5515-01A	Low	C1
TCGA-EJ-5516-01A	Low	C1
TCGA-EJ-5517-01A	Low	C1
TCGA-EJ-5518-01A	High	C1
TCGA-EJ-5519-01A	High	C2
TCGA-EJ-5521-01A	Low	C1
TCGA-EJ-5522-01A	Low	C1
TCGA-EJ-5524-01A	High	C1
TCGA-EJ-5525-01A	High	C1
TCGA-EJ-5526-01A	High	C1
TCGA-EJ-5527-01A	High	C1
TCGA-EJ-5530-01A	Low	C1
TCGA-EJ-5531-01A	Low	C1
TCGA-EJ-5532-01A	Low	C1
TCGA-EJ-5542-01A	Low	C1
TCGA-EJ-7115-01A	High	C1
TCGA-EJ-7123-01A	Low	C2
TCGA-EJ-7125-01A	Low	C2
TCGA-EJ-7314-01A	Low	C2
TCGA-EJ-7315-01A	High	C1
TCGA-EJ-7317-01A	Low	C2
TCGA-EJ-7321-01A	Low	C2
TCGA-EJ-7327-01A	High	C1
TCGA-EJ-7328-01A	High	C1
TCGA-EJ-7330-01A	Low	C1
TCGA-EJ-7331-01A	Low	C1
TCGA-EJ-7781-01A	Low	C1
TCGA-EJ-7782-01A	High	C2
TCGA-EJ-7783-01A	Low	C1
TCGA-EJ-7784-01A	High	C2
TCGA-EJ-7785-01A	Low	C1
TCGA-EJ-7786-01A	Low	C1
TCGA-EJ-7788-01A	High	C1
TCGA-EJ-7789-01A	High	C2
TCGA-EJ-7791-01A	High	C1
TCGA-EJ-7792-01A	Low	C1
TCGA-EJ-7793-01A	Low	C1
TCGA-EJ-7794-01A	Low	C1
TCGA-EJ-7797-01A	Low	C1
TCGA-EJ-8468-01A	Low	C1
TCGA-EJ-8469-01A	High	C2
TCGA-EJ-8470-01A	High	C1
TCGA-EJ-8472-01A	High	C2
TCGA-EJ-8474-01A	Low	C1
TCGA-EJ-A46B-01A	Low	C1
TCGA-EJ-A46D-01A	Low	C1
TCGA-EJ-A46E-01A	Low	C1
TCGA-EJ-A46F-01A	High	C2
TCGA-EJ-A46G-01A	High	C1
TCGA-EJ-A46H-01A	High	C1
TCGA-EJ-A46I-01A	Low	C1
TCGA-EJ-A65B-01A	High	C1
TCGA-EJ-A65D-01A	High	C2
TCGA-EJ-A65E-01A	Low	C2
TCGA-EJ-A65F-01A	High	C2
TCGA-EJ-A65G-01A	Low	C2
TCGA-EJ-A65J-01A	High	C2
TCGA-EJ-A65M-01A	Low	C1
TCGA-EJ-A6RA-01A	Low	C1
TCGA-EJ-A6RC-01A	Low	C1
TCGA-EJ-A7NF-01A	Low	C2
TCGA-EJ-A7NG-01A	Low	C1
TCGA-EJ-A7NH-01A	Low	C1
TCGA-EJ-A7NJ-01A	Low	C1
TCGA-EJ-A7NK-01A	Low	C1
TCGA-EJ-A7NM-01A	High	C1
TCGA-EJ-A7NN-01A	High	C1
TCGA-EJ-A8FN-01A	Low	C1
TCGA-EJ-A8FO-01A	Low	C1
TCGA-EJ-A8FP-01A	Low	C1
TCGA-EJ-A8FS-01A	Low	C2
TCGA-EJ-A8FU-01A	Low	C1
TCGA-EJ-AB20-01A	Low	C1
TCGA-EJ-AB27-01A	Low	C1
TCGA-FC-7708-01A	High	C1
TCGA-FC-7961-01A	High	C1
TCGA-FC-A4JI-01A	High	C2
TCGA-FC-A5OB-01A	Low	C2
TCGA-FC-A66V-01A	Low	C1
TCGA-FC-A6HD-01A	Low	C2
TCGA-FC-A8O0-01A	Low	C1
TCGA-G9-6329-01A	Low	C1
TCGA-G9-6332-01A	Low	C2
TCGA-G9-6333-01A	Low	C1
TCGA-G9-6336-01A	Low	C1
TCGA-G9-6338-01A	High	C1
TCGA-G9-6339-01A	Low	C2
TCGA-G9-6342-01A	Low	C1
TCGA-G9-6343-01A	Low	C2
TCGA-G9-6347-01A	Low	C1
TCGA-G9-6348-01A	High	C1
TCGA-G9-6351-01A	Low	C1
TCGA-G9-6353-01A	Low	C1
TCGA-G9-6354-01A	Low	C2
TCGA-G9-6356-01A	Low	C1
TCGA-G9-6361-01A	Low	C1
TCGA-G9-6362-01A	Low	C2
TCGA-G9-6363-01A	Low	C1
TCGA-G9-6364-01A	Low	C1
TCGA-G9-6365-01A	Low	C1
TCGA-G9-6366-01A	Low	C2
TCGA-G9-6367-01A	Low	C1
TCGA-G9-6369-01A	Low	C2
TCGA-G9-6370-01A	Low	C1
TCGA-G9-6371-01A	Low	C2
TCGA-G9-6373-01A	Low	C1
TCGA-G9-6377-01A	High	C2
TCGA-G9-6378-01A	Low	C1
TCGA-G9-6379-01A	High	C1
TCGA-G9-6384-01A	Low	C1
TCGA-G9-6385-01A	Low	C1
TCGA-G9-6494-01A	Low	C1
TCGA-G9-6496-01A	High	C2
TCGA-G9-6498-01A	Low	C1
TCGA-G9-6499-01A	Low	C2
TCGA-G9-7509-01A	Low	C1
TCGA-G9-7510-01A	High	C1
TCGA-G9-7519-01A	Low	C1
TCGA-G9-7521-01A	High	C1
TCGA-G9-7522-01A	Low	C1
TCGA-G9-7523-01A	High	C1
TCGA-G9-7525-01A	High	C2
TCGA-G9-A9S0-01A	High	C2
TCGA-G9-A9S7-01A	Low	C2
TCGA-H9-7775-01A	Low	C1
TCGA-H9-A6BX-01A	Low	C1
TCGA-H9-A6BY-01A	Low	C2
TCGA-HC-7075-01A	Low	C2
TCGA-HC-7077-01A	Low	C2
TCGA-HC-7078-01A	Low	C2
TCGA-HC-7079-01A	High	C1
TCGA-HC-7080-01A	High	C2
TCGA-HC-7081-01A	High	C1
TCGA-HC-7209-01A	High	C2
TCGA-HC-7210-01A	High	C1
TCGA-HC-7211-01A	Low	C2
TCGA-HC-7212-01A	High	C2
TCGA-HC-7213-01A	High	C2
TCGA-HC-7230-01A	Low	C2
TCGA-HC-7231-01A	High	C2
TCGA-HC-7232-01A	High	C1
TCGA-HC-7233-01A	High	C1
TCGA-HC-7736-01A	High	C1
TCGA-HC-7737-01A	High	C1
TCGA-HC-7738-01A	Low	C2
TCGA-HC-7740-01A	Low	C1
TCGA-HC-7742-01A	Low	C1
TCGA-HC-7744-01A	Low	C2
TCGA-HC-7745-01A	High	C1
TCGA-HC-7747-01A	Low	C1
TCGA-HC-7748-01A	High	C1
TCGA-HC-7749-01A	High	C2
TCGA-HC-7750-01A	Low	C1
TCGA-HC-7752-01A	High	C2
TCGA-HC-7818-01A	Low	C1
TCGA-HC-7819-01A	Low	C2
TCGA-HC-7820-01A	Low	C1
TCGA-HC-7821-01A	High	C2
TCGA-HC-8213-01A	Low	C2
TCGA-HC-8216-01A	High	C1
TCGA-HC-8256-01A	Low	C2
TCGA-HC-8257-01A	Low	C2
TCGA-HC-8258-01A	Low	C1
TCGA-HC-8259-01A	Low	C2
TCGA-HC-8260-01A	Low	C1
TCGA-HC-8261-01A	Low	C2
TCGA-HC-8262-01A	Low	C2
TCGA-HC-8265-01A	High	C1
TCGA-HC-8266-01A	Low	C1
TCGA-HC-A48F-01A	High	C2
TCGA-HC-A4ZV-01A	High	C1
TCGA-HC-A631-01A	High	C2
TCGA-HC-A632-01A	High	C2
TCGA-HC-A6AL-01A	High	C2
TCGA-HC-A6AN-01A	High	C2
TCGA-HC-A6AO-01A	High	C2
TCGA-HC-A6AP-01A	High	C1
TCGA-HC-A6AQ-01A	Low	C2
TCGA-HC-A6AS-01A	High	C1
TCGA-HC-A6HX-01A	High	C1
TCGA-HC-A6HY-01A	Low	C2
TCGA-HC-A76W-01A	High	C1
TCGA-HC-A76X-01A	Low	C2
TCGA-HC-A8CY-01A	High	C2
TCGA-HC-A8D0-01A	High	C1
TCGA-HC-A8D1-01A	Low	C1
TCGA-HC-A9TE-01A	High	C1
TCGA-HC-A9TH-01A	High	C2
TCGA-HI-7168-01A	High	C1
TCGA-HI-7169-01A	Low	C1
TCGA-HI-7170-01A	Low	C1
TCGA-HI-7171-01A	High	C2
TCGA-J4-8198-01A	Low	C1
TCGA-J4-8200-01A	Low	C1
TCGA-J4-A67K-01A	High	C2
TCGA-J4-A67L-01A	High	C2
TCGA-J4-A67M-01A	High	C1
TCGA-J4-A67N-01A	High	C2
TCGA-J4-A67O-01A	Low	C1
TCGA-J4-A67Q-01A	Low	C1
TCGA-J4-A67R-01A	Low	C1
TCGA-J4-A67S-01A	Low	C2
TCGA-J4-A67T-01A	Low	C1
TCGA-J4-A6G1-01A	High	C1
TCGA-J4-A6G3-01A	High	C1
TCGA-J4-A6M7-01A	Low	C2
TCGA-J4-A83I-01A	High	C2
TCGA-J4-A83J-01A	Low	C2
TCGA-J4-A83K-01A	Low	C1
TCGA-J4-A83L-01A	Low	C1
TCGA-J4-A83M-01A	High	C2
TCGA-J4-A83N-01A	Low	C2
TCGA-J4-AATV-01A	Low	C1
TCGA-J4-AATZ-01A	High	C2
TCGA-J4-AAU2-01A	Low	C2
TCGA-J9-A52B-01A	High	C1
TCGA-J9-A52C-01A	High	C1
TCGA-J9-A52D-01A	Low	C2
TCGA-J9-A52E-01A	High	C1
TCGA-J9-A8CK-01A	High	C1
TCGA-J9-A8CL-01A	High	C1
TCGA-J9-A8CM-01A	High	C1
TCGA-J9-A8CN-01A	Low	C2
TCGA-J9-A8CP-01A	High	C2
TCGA-KC-A4BL-01A	High	C1
TCGA-KC-A4BN-01A	Low	C1
TCGA-KC-A4BR-01A	Low	C1
TCGA-KC-A4BV-01A	High	C1
TCGA-KC-A7F3-01A	Low	C1
TCGA-KC-A7F5-01A	High	C2
TCGA-KC-A7F6-01A	Low	C1
TCGA-KC-A7FA-01A	Low	C2
TCGA-KC-A7FD-01A	Low	C2
TCGA-KC-A7FE-01A	Low	C1
TCGA-KK-A59V-01A	High	C2
TCGA-KK-A59X-01A	High	C2
TCGA-KK-A59Y-01A	Low	C2
TCGA-KK-A59Z-01A	High	C1
TCGA-KK-A5A1-01A	High	C2
TCGA-KK-A6DY-01A	Low	C1
TCGA-KK-A6E0-01A	Low	C2
TCGA-KK-A6E1-01A	High	C2
TCGA-KK-A6E2-01A	High	C2
TCGA-KK-A6E3-01A	Low	C1
TCGA-KK-A6E4-01A	Low	C2
TCGA-KK-A6E5-01A	Low	C2
TCGA-KK-A6E6-01A	High	C1
TCGA-KK-A6E7-01A	High	C2
TCGA-KK-A6E8-01A	Low	C2
TCGA-KK-A7AP-01A	High	C2
TCGA-KK-A7AQ-01A	High	C2
TCGA-KK-A7AU-01A	High	C2
TCGA-KK-A7AV-01A	High	C1
TCGA-KK-A7AW-01A	High	C2
TCGA-KK-A7AY-01A	High	C2
TCGA-KK-A7AZ-01A	High	C2
TCGA-KK-A7B0-01A	High	C1
TCGA-KK-A7B1-01A	High	C1
TCGA-KK-A7B2-01A	High	C1
TCGA-KK-A7B3-01A	High	C1
TCGA-KK-A7B4-01A	High	C2
TCGA-KK-A8I4-01A	High	C1
TCGA-KK-A8I5-01A	Low	C2
TCGA-KK-A8I6-01A	High	C2
TCGA-KK-A8I7-01A	High	C1
TCGA-KK-A8I8-01A	High	C2
TCGA-KK-A8I9-01A	High	C1
TCGA-KK-A8IA-01A	High	C2
TCGA-KK-A8IB-01A	High	C2
TCGA-KK-A8IC-01A	High	C1
TCGA-KK-A8ID-01A	High	C2
TCGA-KK-A8IF-01A	High	C2
TCGA-KK-A8IG-01A	High	C1
TCGA-KK-A8IH-01A	High	C2
TCGA-KK-A8II-01A	High	C2
TCGA-KK-A8IJ-01A	Low	C2
TCGA-KK-A8IK-01A	High	C2
TCGA-KK-A8IL-01A	High	C1
TCGA-KK-A8IM-01A	High	C1
TCGA-M7-A71Y-01A	Low	C1
TCGA-M7-A71Z-01A	High	C2
TCGA-M7-A720-01A	Low	C1
TCGA-M7-A721-01A	High	C1
TCGA-M7-A722-01A	High	C2
TCGA-M7-A723-01A	Low	C1
TCGA-M7-A724-01A	High	C2
TCGA-M7-A725-01A	High	C2
TCGA-MG-AAMC-01A	Low	C2
TCGA-QU-A6IL-01A	Low	C2
TCGA-QU-A6IM-01A	Low	C2
TCGA-QU-A6IN-01A	High	C2
TCGA-QU-A6IO-01A	Low	C2
TCGA-QU-A6IP-01A	Low	C1
TCGA-SU-A7E7-01A	High	C1
TCGA-TK-A8OK-01A	High	C1
TCGA-TP-A8TT-01A	High	C1
TCGA-TP-A8TV-01A	High	C2
TCGA-V1-A8MF-01A	Low	C1
TCGA-V1-A8MG-01A	High	C1
TCGA-V1-A8MK-01A	Low	C1
TCGA-V1-A8ML-01A	Low	C1
TCGA-V1-A8MM-01A	High	C2
TCGA-V1-A8MU-01A	Low	C1
TCGA-V1-A8WL-01A	Low	C1
TCGA-V1-A8WN-01A	Low	C1
TCGA-V1-A8WS-01A	Low	C2
TCGA-V1-A8WV-01A	High	C1
TCGA-V1-A8WW-01A	High	C2
TCGA-V1-A8X3-01A	Low	C1
TCGA-V1-A9O5-01A	High	C1
TCGA-V1-A9O7-01A	High	C1
TCGA-V1-A9O9-01A	High	C1
TCGA-V1-A9OA-01A	High	C1
TCGA-V1-A9OF-01A	Low	C2
TCGA-V1-A9OH-01A	Low	C1
TCGA-V1-A9OL-01A	High	C2
TCGA-V1-A9OQ-01A	Low	C2
TCGA-V1-A9OT-01A	Low	C2
TCGA-V1-A9OX-01A	Low	C1
TCGA-V1-A9OY-01A	Low	C1
TCGA-V1-A9Z7-01A	High	C1
TCGA-V1-A9Z8-01A	High	C1
TCGA-V1-A9Z9-01A	High	C1
TCGA-V1-A9ZG-01A	High	C1
TCGA-V1-A9ZI-01A	High	C1
TCGA-V1-A9ZK-01A	Low	C1
TCGA-V1-A9ZR-01A	High	C1
TCGA-VN-A88I-01A	High	C1
TCGA-VN-A88K-01A	High	C1
TCGA-VN-A88L-01A	Low	C1
TCGA-VN-A88M-01A	Low	C2
TCGA-VN-A88N-01A	High	C2
TCGA-VN-A88O-01A	Low	C2
TCGA-VN-A88P-01A	High	C1
TCGA-VN-A88Q-01A	Low	C2
TCGA-VN-A88R-01A	High	C2
TCGA-VN-A943-01A	Low	C2
TCGA-VP-A872-01A	High	C1
TCGA-VP-A875-01A	High	C2
TCGA-VP-A876-01A	Low	C2
TCGA-VP-A878-01A	High	C1
TCGA-VP-A879-01A	Low	C1
TCGA-VP-A87B-01A	High	C2
TCGA-VP-A87C-01A	High	C1
TCGA-VP-A87D-01A	High	C2
TCGA-VP-A87E-01A	Low	C1
TCGA-VP-A87H-01A	High	C2
TCGA-VP-A87J-01A	High	C2
TCGA-VP-A87K-01A	High	C2
TCGA-VP-AA1N-01A	High	C1
TCGA-WW-A8ZI-01A	Low	C2
TCGA-X4-A8KQ-01A	High	C1
TCGA-X4-A8KS-01A	Low	C1
TCGA-XA-A8JR-01A	Low	C1
TCGA-XJ-A83F-01A	Low	C2
TCGA-XJ-A83G-01A	Low	C2
TCGA-XJ-A83H-01A	Low	C2
TCGA-XJ-A9DI-01A	High	C1
TCGA-XJ-A9DK-01A	Low	C1
TCGA-XJ-A9DQ-01A	Low	C1
TCGA-XJ-A9DX-01A	High	C2
TCGA-XK-AAIR-01A	Low	C1
TCGA-XK-AAIV-01A	High	C1
TCGA-XK-AAIW-01A	High	C2
TCGA-XK-AAJA-01A	High	C2
TCGA-XK-AAJP-01A	High	C2
TCGA-XK-AAJR-01A	High	C1
TCGA-XK-AAJT-01A	Low	C1
TCGA-XK-AAJU-01A	Low	C1
TCGA-XQ-A8TA-01A	High	C2
TCGA-XQ-A8TB-01A	High	C1
TCGA-Y6-A8TL-01A	Low	C1
TCGA-Y6-A9XI-01A	High	C2
TCGA-YJ-A8SW-01A	Low	C2
TCGA-YL-A8HJ-01A	High	C1
TCGA-YL-A8HK-01A	High	C1
TCGA-YL-A8HL-01A	High	C2
TCGA-YL-A8HM-01A	High	C2
TCGA-YL-A8HO-01A	Low	C1
TCGA-YL-A8S8-01A	High	C2
TCGA-YL-A8S9-01A	High	C2
TCGA-YL-A8SA-01A	High	C2
TCGA-YL-A8SB-01A	Low	C1
TCGA-YL-A8SC-01A	High	C2
TCGA-YL-A8SI-01A	Low	C1
TCGA-YL-A9WH-01A	High	C2
TCGA-YL-A9WI-01A	High	C2
TCGA-YL-A9WJ-01A	High	C1
TCGA-YL-A9WK-01A	High	C1
TCGA-YL-A9WL-01A	High	C2
TCGA-YL-A9WX-01A	High	C1
TCGA-YL-A9WY-01A	High	C1
TCGA-ZG-A8QW-01A	High	C1
TCGA-ZG-A8QX-01A	Low	C1
TCGA-ZG-A8QY-01A	High	C1
TCGA-ZG-A8QZ-01A	High	C1
TCGA-ZG-A9KY-01A	High	C2
TCGA-ZG-A9L0-01A	High	C1
TCGA-ZG-A9L1-01A	Low	C1
TCGA-ZG-A9L2-01A	High	C1
TCGA-ZG-A9L4-01A	High	C1
TCGA-ZG-A9L5-01A	High	C2
TCGA-ZG-A9L6-01A	Low	C1
TCGA-ZG-A9L9-01A	High	C1
TCGA-ZG-A9LB-01A	High	C1
TCGA-ZG-A9LM-01A	High	C1
TCGA-ZG-A9LN-01A	High	C1
TCGA-ZG-A9LS-01A	High	C1
TCGA-ZG-A9LU-01A	High	C1
TCGA-ZG-A9LY-01A	High	C1
TCGA-ZG-A9LZ-01A	High	C2
TCGA-ZG-A9M4-01A	High	C2
TCGA-ZG-A9MC-01A	High	C1
TCGA-ZG-A9N3-01A	Low	C2
TCGA-ZG-A9ND-01A	High	C2
TCGA-ZG-A9NI-01A	High	C1

## Sheet: IPS_res
sample	Riskgroup	ips_ctla4_neg_pd1_neg	ips_ctla4_neg_pd1_pos	ips_ctla4_pos_pd1_neg	ips_ctla4_pos_pd1_pos
